# Supplementary material
Source: PubMed Central journal article supplement (PMC3612679)
Supplement: 1216375110_sd01.pdf [file 1216375110_sd01.pdf]

**Supplemental Dataset Table 1. Peptides Identified Containing Modifications Corresponding to AnI Incorporation**

|                                                 |
|-------------------------------------------------|
| Legend:                                         |
| N-terminal Peptide (amino acid start index = 1) |
| N-terminal Peptide (amino acid start index = 2) |
| Internal Peptide                                |
| C-terminal Peptide                              |

|    | Protein name                                               | Protein accession numbers           | Protein molecular weight (Da) | Peptide start index | Peptide stop index | Peptide sequence      | Previous amino acid | Next amino acid | Calculated +1H peptide mass (AMU) | AnI position | Probe            |
|----|------------------------------------------------------------|-------------------------------------|-------------------------------|---------------------|--------------------|-----------------------|---------------------|-----------------|-----------------------------------|--------------|------------------|
| 1  | GRB2 Isoform 1 of Growth factor receptor-bound protein 2   | IPI00021327                         | 25,188.80                     | 1                   | 6                  | MEAIK                 | -                   | Y               | 1,148.56                          | 1            | DIBAC-S-S-biotin |
| 2  | SYNGR2 Synaptogyrin-2                                      | IPI00013946,IPI00654744,IPI00789763 | 24,792.20                     | 1                   | 10                 | MESGAYGAAK            | -                   | A               | 1,470.65                          | 1            | DIBAC-S-S-biotin |
| 3  | HIST1H1C Histone H1.2                                      | IPI00217465                         | 21,347.80                     | 1                   | 21                 | MSETAPAAPAAAPPAEKAPVK | -                   | K               | 2,449.23                          | 1            | DIBAC-S-S-biotin |
| 4  | YWHAB Isoform Short of 14-3-3 protein beta/alpha           | IPI00759832                         | 27,832.80                     | 1                   | 9                  | MDKSELVQK             | -                   | A               | 1,563.76                          | 1            | DIBAC-S-S-biotin |
| 5  | YWHAE 14-3-3 protein epsilon                               | IPI00000816                         | 29,157.00                     | 1                   | 12                 | MDDREDLVYQAK          | -                   | L               | 1,968.89                          | 1            | DIBAC-S-S-biotin |
| 6  | YWHAZ 14-3-3 protein zeta/delta                            | IPI00021263                         | 27,727.90                     | 1                   | 9                  | MDKNELVQK             | -                   | A               | 1,590.77                          | 1            | DIBAC-S-S-biotin |
| 7  | SLC25A5 ADP/ATP translocase 2                              | IPI00007188                         | 32,878.50                     | 1                   | 10                 | MTDAAVSFAK            | -                   | D               | 1,484.70                          | 1            | DIBAC-S-S-biotin |
| 8  | EIF3I Eukaryotic translation initiation factor 3 subunit I | IPI00012795                         | 36,484.00                     | 1                   | 11                 | MKPILLQGHER           | -                   | S               | 1,765.93                          | 1            | DIBAC-S-S-biotin |
| 9  | TUBB2C Tubulin beta-2C chain                               | IPI00007752                         | 49,812.70                     | 1                   | 19                 | MREIVHLQAGQCGNQIGAK   | -                   | F               | 2,554.26                          | 1            | DIBAC-S-S-biotin |
| 10 | STIP1 Stress-induced-phosphoprotein 1                      | IPI00013894,IPI00871856             | 62,624.10                     | 1                   | 10                 | MEQVNELKEK            | -                   | G               | 1,733.83                          | 1            | DIBAC-S-S-biotin |
| 11 | EEF2 Elongation factor 2                                   | IPI00186290                         | 95,322.10                     | 1                   | 10                 | MVNFTVDQIR            | -                   | A               | 1,666.82                          | 1            | DIBAC-S-S-biotin |
| 12 | PTBP1 polypyrimidine tract-binding protein 1 isoform a     | IPI00183626,IPI00334175             | 59,616.40                     | 1                   | 14                 | MDGIVPDIAVGTKR        | -                   | G               | 2,190.05                          | 1            | DIBAC-biotin     |

**Supplemental Dataset Table 2. Unmodified Peptides Identified Following An1-labeling and DIBAC-Biotin Enrichment**

|                                                 |
|-------------------------------------------------|
| Legend:                                         |
| N-terminal Peptide (amino acid start index = 1) |
| N-terminal Peptide (amino acid start index = 2) |
| Internal Peptide                                |
| C-terminal Peptide                              |

|    | Protein name                                                  | Protein accession numbers                                                                                                                                                                                                                                                           | Protein molecular weight (Da) | Peptide start index | Peptide stop index | Peptide sequence       | Previous amino acid | Next amino acid | Calculated +1H peptide mass (AMU) |
|----|---------------------------------------------------------------|-------------------------------------------------------------------------------------------------------------------------------------------------------------------------------------------------------------------------------------------------------------------------------------|-------------------------------|---------------------|--------------------|------------------------|---------------------|-----------------|-----------------------------------|
| 1  | KPNB1 Importin subunit beta-1                                 | IPI00001639                                                                                                                                                                                                                                                                         | 97,153.30                     | 1                   | 9                  | MELITILEK              | -                   | T               | 1,131.63                          |
| 2  | ACACA Isoform 1 of Acetyl-CoA carboxylase 1                   | IPI00011569                                                                                                                                                                                                                                                                         | 265,538.40                    | 1                   | 18                 | MDEPSPLAQPLELNQHSR     | -                   | F               | 2,104.01                          |
| 3  | FASN Fatty acid synthase                                      | IPI00026781                                                                                                                                                                                                                                                                         | 273,382.00                    | 1                   | 12                 | MEEVVIAGMSGK           | -                   | L               | 1,292.62                          |
| 4  | UBB;RPS27A;UBC ubiquitin and ribosomal protein S27a precursor | IPI00179330,IPI00397808,IPI00456429,IPI00719280,IPI00743241,IPI00743650,IPI00744274,IPI00784990,IPI00789107,IPI00789823,IPI00790633,IPI00792712,IPI00793330,IPI00793729,IPI00793810,IPI00794211,IPI00794925,IPI00795527,IPI00796007,IPI00796600,IPI00797400,IPI00798127,IPI00798155 | 17,947.60                     | 1                   | 6                  | MQIFVK                 | -                   | T               | 765.4328                          |
| 5  | UBB;RPS27A;UBC ubiquitin and ribosomal protein S27a precursor | IPI00179330,IPI00397808,IPI00456429,IPI00719280,IPI00743241,IPI00743650,IPI00744274,IPI00784990,IPI00789107,IPI00789823,IPI00790633,IPI00792712,IPI00793330,IPI00793729,IPI00793810,IPI00794211,IPI00794925,IPI00795527,IPI00796007,IPI00796600,IPI00797400,IPI00798127,IPI00798155 | 17,947.60                     | 1                   | 6                  | MQIFVK                 | -                   | T               | 765.4328                          |
| 6  | UBB;RPS27A;UBC ubiquitin and ribosomal protein S27a precursor | IPI00179330,IPI00397808,IPI00456429,IPI00719280,IPI00743241,IPI00743650,IPI00744274,IPI00784990,IPI00789107,IPI00789823,IPI00790633,IPI00792712,IPI00793330,IPI00793729,IPI00793810,IPI00794211,IPI00794925,IPI00795527,IPI00796007,IPI00796600,IPI00797400,IPI00798127,IPI00798155 | 17,947.60                     | 1                   | 8                  | MQIFVKTL               | -                   | T               | 979.5646                          |
| 7  | UBB;RPS27A;UBC ubiquitin and ribosomal protein S27a precursor | IPI00179330,IPI00397808,IPI00456429,IPI00719280,IPI00743241,IPI00743650,IPI00744274,IPI00784990,IPI00789107,IPI00789823,IPI00790633,IPI00792712,IPI00793330,IPI00793729,IPI00793810,IPI00794211,IPI00794925,IPI00795527,IPI00796007,IPI00796600,IPI00797400,IPI00798127,IPI00798155 | 17,947.60                     | 1                   | 8                  | MQIFVKTL               | -                   | T               | 979.5646                          |
| 8  | FAM46C Protein FAM46C                                         | IPI00646224                                                                                                                                                                                                                                                                         | 44,926.90                     | 1                   | 19                 | MAEESSTRDCMSFSVLNW     | -                   | D               | 3,044.18                          |
| 9  | SLC25A5 ADP/ATP translocase 2                                 | IPI00007188                                                                                                                                                                                                                                                                         | 32,878.50                     | 2                   | 10                 | TDAAVSFAK              | M                   | D               | 951.4782                          |
| 10 | CFL1 Cofilin-1                                                | IPI00012011,IPI00909841                                                                                                                                                                                                                                                             | 18,485.10                     | 2                   | 13                 | ASGVAVSDGVIK           | M                   | V               | 1,144.62                          |
| 11 | ACTG1 Actin, cytoplasmic 2                                    | IPI00021440                                                                                                                                                                                                                                                                         | 41,775.90                     | 2                   | 18                 | EEEEIALVIDNGSGMCK      | M                   | A               | 1,877.86                          |
| 12 | HNRNPM Isoform 1 of Heterogeneous nuclear ribonucleoprotein M | IPI00171903,IPI00383296                                                                                                                                                                                                                                                             | 77,499.30                     | 2                   | 17                 | AAGVEAAAEVAATEIK       | M                   | M               | 1,542.80                          |
| 13 | CCT2 T-complex protein 1 subunit beta                         | IPI00297779                                                                                                                                                                                                                                                                         | 57,471.90                     | 2                   | 13                 | ASLSLAPVNIFK           | M                   | A               | 1,301.75                          |
| 14 | HSPA1A;HSPA1B Heat shock 70 kDa protein 1                     | IPI00304925                                                                                                                                                                                                                                                                         | 70,036.00                     | 2                   | 15                 | AKAAAIGIDLGTTY         | M                   | S               | 1,406.75                          |
| 15 | PARP1 Poly [ADP-ribose] polymerase 1                          | IPI00449049                                                                                                                                                                                                                                                                         | 113,069.80                    | 2                   | 10                 | AESSDKLYR              | M                   | V               | 1,110.54                          |
| 16 | TUBB2C Tubulin beta-2C chain                                  | IPI00007752                                                                                                                                                                                                                                                                         | 49,812.70                     | 3                   | 19                 | EIVHLQAGQCQGNQIGAK     | R                   | F               | 1,822.92                          |
| 17 | MARS Methionyl-tRNA synthetase, cytoplasmic                   | IPI00008240                                                                                                                                                                                                                                                                         | 101,099.50                    | 3                   | 21                 | LFVSDGVPGCLPVLAAAGR    | R                   | A               | 1,899.02                          |
| 18 | TUBB Tubulin beta chain                                       | IPI00011654                                                                                                                                                                                                                                                                         | 49,652.60                     | 3                   | 19                 | EIVHIQAGQCQGNQIGAK     | R                   | F               | 1,822.92                          |
| 19 | TUBB4 Tubulin beta-4 chain                                    | IPI00023598                                                                                                                                                                                                                                                                         | 49,567.40                     | 3                   | 19                 | EIVHLQAGQCQGNQIGAK     | R                   | F               | 1,822.92                          |
| 20 | TUBB2B Tubulin beta-2B chain                                  | IPI00031370                                                                                                                                                                                                                                                                         | 49,935.10                     | 3                   | 19                 | EIVHIQAGQCQGNQIGAK     | R                   | F               | 1,822.92                          |
| 21 | IGF2BP1 Insulin-like growth factor 2 mRNA-binding protein 1   | IPI00008557                                                                                                                                                                                                                                                                         | 63,438.30                     | 4                   | 20                 | LYIGNLINESVTPADLEK     | K                   | V               | 1,875.97                          |
| 22 | SFRS3 Splicing factor, arginine/serine-rich 3                 | IPI00010204,IPI00843996                                                                                                                                                                                                                                                             | 19,312.00                     | 4                   | 11                 | DSCPLDCK               | R                   | V               | 994.3971                          |
| 23 | RPL17;LOC100133931 60S ribosomal protein L17                  | IPI00413324,IPI00478208,IPI00514874,IPI00887088                                                                                                                                                                                                                                     | 21,379.40                     | 4                   | 13                 | YSLDPENPTK             | R                   | S               | 1,163.56                          |
| 24 | TPT1 Tumor protein, translationally-controlled 1              | IPI00009943,IPI00550900,IPI00908553                                                                                                                                                                                                                                                 | 21,508.50                     | 6                   | 19                 | DLISHDEMFSDIYK         | R                   | I               | 1,712.78                          |
| 25 | UNG Isoform 2 of Uracil-DNA glycosylase                       | IPI00011069                                                                                                                                                                                                                                                                         | 34,627.40                     | 6                   | 17                 | TLYFFSPSPAR            | K                   | K               | 1,372.69                          |
| 26 | RAP1B Ras-related protein Rap-1b                              | IPI00015148,IPI00908754,IPI00910592                                                                                                                                                                                                                                                 | 20,806.90                     | 6                   | 16                 | LVLVLSGGVGK            | K                   | S               | 985.6042                          |
| 27 | CDC42 Isoform 2 of Cell division control protein 42 homolog   | IPI00016786,IPI00909484                                                                                                                                                                                                                                                             | 21,240.70                     | 6                   | 16                 | CVVVG DGAVGK           | K                   | T               | 1,060.55                          |
| 28 | NAT13 Isoform 1 of N-acetyltransferase 13                     | IPI00018627                                                                                                                                                                                                                                                                         | 19,380.90                     | 6                   | 17                 | IELGDVTPHNIK           | R                   | Q               | 1,335.73                          |
| 29 | PRPS1 Ribose-phosphate pyrophosphokinase 1                    | IPI00219616,IPI00917169                                                                                                                                                                                                                                                             | 34,816.70                     | 6                   | 18                 | IFSGSSHQDLSQK          | K                   | I               | 1,433.70                          |
| 30 | EEF1A1 Elongation factor 1-alpha 1                            | IPI00396485                                                                                                                                                                                                                                                                         | 50,123.20                     | 6                   | 20                 | THINIVIGHVDSGK         | K                   | S               | 1,588.88                          |
| 31 | PSMD2 26S proteasome non-ATPase regulatory subunit 2          | IPI00012268                                                                                                                                                                                                                                                                         | 100,184.20                    | 7                   | 31                 | DKAPVQPQQSPAAAPGGTDE   | R                   | E               | 2,461.23                          |
| 32 | TFRC Transferrin receptor protein 1                           | IPI00022462                                                                                                                                                                                                                                                                         | 84,855.60                     | 7                   | 22                 | KPSGK SAFSNLFGGEPLSYTR | R                   | F               | 1,745.85                          |

|    |                                                                                            |                                                                         |            |    |    |                                |   |   |          |
|----|--------------------------------------------------------------------------------------------|-------------------------------------------------------------------------|------------|----|----|--------------------------------|---|---|----------|
| 33 | ATP1A1 Isoform Long of Sodium/potassium-transporting ATPase subunit alpha-1                | UPI00006482,UPI00646182                                                 | 112,881.50 | 8  | 22 | DKYEPAAVSEQGDKK                | R | G | 1,664.81 |
| 34 | HSDL2 Isoform 2 of Hydroxysteroid dehydrogenase-like protein 2                             | UPI00031107,UPI00414384                                                 | 37,303.60  | 8  | 20 | LAGCTVFITGASR                  | R | G | 1,352.70 |
| 35 | LDHB L-lactate dehydrogenase B chain                                                       | UPI00219217                                                             | 36,620.60  | 8  | 23 | LIAPVAEEETVPNNK                | K | I | 1,694.90 |
| 36 | SPTAN1 cDNA FLJ61399, highly similar to Spectrin alpha chain, brain                        | UPI00744706,UPI00843765,UPI00844215,UPI00871535,UPI00879810             | 282,131.80 | 8  | 18 | VLETAEDIQER                    | K | R | 1,302.65 |
| 37 | SLC25A5 ADP/ATP translocase 2                                                              | UPI00007188                                                             | 32,878.50  | 9  | 34 | AKDFLAGGVAAAISKTAVAPIE<br>RVKL | F | L | 2,596.52 |
| 38 | PPP2CA Serine/threonine-protein phosphatase 2A catalytic subunit alpha isoform             | UPI00008380,UPI00815784                                                 | 35,576.50  | 9  | 21 | ELDQWIEQLNECK                  | K | Q | 1,704.79 |
| 39 | HNRNPA0 Heterogeneous nuclear ribonucleoprotein A0                                         | UPI00011913                                                             | 30,822.50  | 9  | 24 | LFIGGLNVQTSSEGLR               | K | G | 1,690.91 |
| 40 | SLC25A6 ADP/ATP translocase 3                                                              | UPI00291467                                                             | 32,849.10  | 9  | 34 | AKDFLAGGIAAAISKTAVAPIE<br>RVKL | F | L | 2,610.53 |
| 41 | PPIA Peptidyl-prolyl cis-trans isomerase A                                                 | UPI00419585,UPI00887678                                                 | 17,994.90  | 9  | 22 | DIAVDGEPLGRVSF                 | F | E | 1,474.75 |
| 42 | AK1 Adenylate kinase isoenzyme 1                                                           | UPI00018342,UPI00640817                                                 | 21,617.10  | 10 | 21 | IIFVVGPGPSGK                   | K | G | 1,130.66 |
| 43 | CDC2 Putative uncharacterized protein DKFZp686L20222                                       | UPI00026689                                                             | 34,762.10  | 10 | 20 | IGEGTYGVVYK                    | K | G | 1,185.62 |
| 44 | RPL7 60S ribosomal protein L7                                                              | UPI00030179,UPI00472171,UPI00871827,UPI00872387                         | 29,209.70  | 10 | 19 | EVPVPETLK                      | K | K | 1,082.61 |
| 45 | RBMX Heterogeneous nuclear ribonucleoprotein G                                             | UPI00304692                                                             | 42,315.70  | 10 | 22 | LFIGGLNTETNEK                  | K | A | 1,435.74 |
| 46 | SLC25A5 ADP/ATP translocase 2                                                              | UPI00007188                                                             | 32,878.50  | 11 | 23 | DFLAGGVAAAISK                  | K | T | 1,219.67 |
| 47 | RAB1B Ras-related protein Rab-1B                                                           | UPI00008964,UPI00871366                                                 | 22,154.00  | 11 | 21 | LLLIGDSGVGK                    | K | S | 1,071.64 |
| 48 | RAB7A Ras-related protein Rab-7a                                                           | UPI00016342                                                             | 23,472.00  | 11 | 21 | VILGDSGVGK                     | K | T | 1,057.63 |
| 49 | RANBP2 E3 SUMO-protein ligase RanBP2                                                       | UPI00221325                                                             | 358,180.20 | 11 | 23 | YIASVQGSTPSPR                  | R | Q | 1,362.70 |
| 50 | PSMA5 Proteasome subunit alpha type-5                                                      | UPI00291922                                                             | 26,393.30  | 11 | 20 | GVNTFSPEGR                     | R | L | 1,063.52 |
| 51 | SFRS3 Splicing factor, arginine/serine-rich 3                                              | UPI00010204,UPI00843996                                                 | 19,312.00  | 12 | 28 | VYVGNLGNNGNKTELER              | K | A | 1,876.95 |
| 52 | HNRNPH1 Heterogeneous nuclear ribonucleoprotein H                                          | UPI00013881,UPI00479191                                                 | 49,211.80  | 12 | 20 | VVKVRGLPW                      | F | S | 1,053.66 |
| 53 | YWHAQ 14-3-3 protein theta                                                                 | UPI00018146                                                             | 27,747.40  | 12 | 18 | LAEQAER                        | K | Y | 816.421  |
| 54 | YWHAZ 14-3-3 protein zeta/delta                                                            | UPI00021263                                                             | 27,727.90  | 12 | 18 | LAEQAER                        | K | Y | 816.421  |
| 55 | LMNA Isoform A of Lamin-A/C                                                                | UPI00021405,UPI00216952,UPI00216953,UPI00514204,UPI00644087,UPI00655812 | 74,122.60  | 12 | 25 | SGAQASSTPLSPTR                 | R | I | 1,359.69 |
| 56 | TKT transketolase isoform 2                                                                | UPI00792641                                                             | 58,965.00  | 12 | 21 | LQALKDTANR                     | K | L | 1,129.63 |
| 57 | YWHAE 14-3-3 protein epsilon                                                               | UPI00000816                                                             | 29,157.00  | 13 | 19 | LAEQAER                        | K | Y | 816.421  |
| 58 | TXNDC9 Thioredoxin domain-containing protein 9                                             | UPI00022386,UPI00917664                                                 | 26,517.00  | 13 | 23 | VLEHQLLQTTK                    | K | L | 1,309.75 |
| 59 | YWHAG 14-3-3 protein gamma                                                                 | UPI00220642                                                             | 28,285.10  | 13 | 19 | LAEQAER                        | R | Y | 816.421  |
| 60 | SFRS3 Splicing factor, arginine/serine-rich 3                                              | UPI00010204,UPI00843996                                                 | 19,312.00  | 14 | 30 | VGNLGNNGNKTELERAF              | Y | G | 1,832.93 |
| 61 | STIP1 Stress-induced-phosphoprotein 1                                                      | UPI00013894,UPI00871856                                                 | 62,624.10  | 14 | 32 | ALSVGNIDDALQCYSEAIK            | K | L | 2,067.01 |
| 62 | STIP1 Stress-induced-phosphoprotein 1                                                      | UPI00013894,UPI00871856                                                 | 62,624.10  | 14 | 32 | ALSVGNIDDALQCYSEAIK            | K | L | 2,067.01 |
| 63 | RAB11B Ras-related protein Rab-11B                                                         | UPI00020436,UPI00429190,UPI00795676                                     | 24,471.00  | 14 | 24 | VVLIGDSGVGK                    | K | S | 1,043.61 |
| 64 | YWHAB Isoform Long of 14-3-3 protein beta/alpha                                            | UPI00216318,UPI00759832                                                 | 28,065.10  | 14 | 20 | LAEQAER                        | K | Y | 816.421  |
| 65 | TTL3 cDNA FLJ14048 fis, clone HEMBA1006650, weakly similar to ARP2/3 COMPLEX 20 KD SUBUNIT | UPI00386354,UPI00554811,UPI00790262                                     | 19,649.40  | 14 | 32 | ATLQAALCLENFSSQVVER            | R | H | 2,136.08 |
| 66 | ST13 Hsc70-interacting protein                                                             | UPI00032826                                                             | 41,314.40  | 15 | 29 | MCKQDPSVLHTEEMR                | K | F | 1,860.84 |
| 67 | ALDOA Fructose-bisphosphate aldolase A                                                     | UPI00465439,UPI00796333                                                 | 39,402.60  | 15 | 22 | ELSDIAHR                       | K | I | 940.4847 |
| 68 | HNRNPA1 Isoform A1-B of Heterogeneous nuclear ribonucleoprotein A1                         | UPI00215965,UPI00465365                                                 | 38,828.10  | 16 | 31 | LFIGGLSFETTDESLR               | K | S | 1,784.91 |
| 69 | RNASEH2A Ribonuclease H2 subunit A                                                         | UPI00290192                                                             | 33,377.00  | 16 | 25 | LSSPVPVAVCR                    | R | K | 1,085.58 |
| 70 | HSP90AB1 Heat shock protein HSP 90-beta                                                    | UPI00414676                                                             | 83,249.30  | 16 | 24 | AFQAEIAQL                      | F | M | 990.5255 |
| 71 | ENO1 Isoform alpha-enolase of Alpha-enolase                                                | UPI00465248                                                             | 47,152.20  | 16 | 28 | GNPTVEVDLFTSK                  | R | G | 1,406.72 |
| 72 | HNRNPH1 Heterogeneous nuclear ribonucleoprotein H                                          | UPI00013881,UPI00479191                                                 | 49,211.80  | 17 | 29 | GLPWSCSADEVQR                  | R | F | 1,504.69 |
| 73 | RPL12 Isoform 1 of 60S ribosomal protein L12                                               | UPI00024933                                                             | 17,801.10  | 17 | 31 | CTGGVEVGATSALAPK               | R | I | 1,418.69 |
| 74 | ATP1B3 Sodium/potassium-transporting ATPase subunit beta-3                                 | UPI00008167                                                             | 31,495.70  | 18 | 31 | LFYNPPTTGEFLGR                 | K | T | 1,627.85 |

|     |                                                                                                  |                                                                                                 |            |    |    |                                 |   |   |          |
|-----|--------------------------------------------------------------------------------------------------|-------------------------------------------------------------------------------------------------|------------|----|----|---------------------------------|---|---|----------|
| 75  | KHDRBS1 Isoform 1 of KH domain-containing, RNA-binding, signal transduction-associated protein 1 | IP100008575,IP100385834,IP100479209                                                             | 48,210.20  | 18 | 31 | SGSMDPSSGAHPSVR                 | R | Q | 1,384.63 |
| 76  | CUGBP1 Isoform 1 of CUG-BP- and ETR-3-like factor 1                                              | IP100034015,IP100218388,IP100218389,IP100853009                                                 | 52,046.00  | 18 | 25 | MFVGVQVPR                       | K | T | 933.4975 |
| 77  | ACACA Isoform 1 of Acetyl-CoA carboxylase 1                                                      | IP100011569                                                                                     | 265,538.40 | 19 | 38 | FIIGSVSEDNSEDEISNLVK            | R | L | 2,195.07 |
| 78  | YWHAZ 14-3-3 protein zeta/delta                                                                  | IP100021263                                                                                     | 27,727.90  | 19 | 27 | YDDMAACMK                       | R | S | 1,104.42 |
| 79  | ACTG1 Actin, cytoplasmic 2                                                                       | IP100021440                                                                                     | 41,775.90  | 19 | 28 | AGFAGDDAPR                      | K | A | 976.4484 |
| 80  | ACTG1 Actin, cytoplasmic 2                                                                       | IP100021440                                                                                     | 41,775.90  | 19 | 28 | AGFAGDDAPR                      | K | A | 976.4484 |
| 81  | GSTP1 Glutathione S-transferase P                                                                | IP100219757                                                                                     | 23,338.70  | 19 | 29 | RMLLADQGGQSW                    | L | K | 1,304.64 |
| 82  | TCP1 T-complex protein 1 subunit alpha                                                           | IP100290566                                                                                     | 60,327.20  | 19 | 33 | SQNVMAAASIANIVK                 | R | S | 1,516.82 |
| 83  | PC Pyruvate carboxylase, mitochondrial                                                           | IP100299402                                                                                     | 129,616.70 | 19 | 30 | TSTAPAASPNVR                    | R | R | 1,171.61 |
| 84  | HSPA4 Heat shock 70 kDa protein 4                                                                | IP100002966                                                                                     | 94,313.90  | 20 | 33 | AGGIETIANEYSR                   | R | C | 1,495.70 |
| 85  | TPT1 Tumor protein, translationally-controlled 1                                                 | IP100009943,IP100550900,IP100908553                                                             | 21,508.50  | 20 | 34 | IREIADGLCLEVEGK                 | K | M | 1,701.88 |
| 86  | TUBB Tubulin beta chain                                                                          | IP100011654                                                                                     | 49,652.60  | 20 | 46 | FWEVISDEHGIDPTGTYHGDS<br>DLQLDR | K | I | 3,102.41 |
| 87  | ARF1 ADP-ribosylation factor 1                                                                   | IP100215914,IP100215917                                                                         | 20,679.60  | 20 | 30 | ILMVGLDAAGK                     | R | T | 1,087.62 |
| 88  | GSTP1 Glutathione S-transferase P                                                                | IP100219757                                                                                     | 23,338.70  | 20 | 45 | MLLADQGGQSWKEEVTVET<br>WQEGSLK  | R | A | 2,991.48 |
| 89  | NCAPD2 Condensin complex subunit 1                                                               | IP100299524                                                                                     | 157,155.30 | 20 | 35 | SGGVNQYVVQEVLSIK                | K | H | 1,719.93 |
| 90  | HNRNPH1 Heterogeneous nuclear ribonucleoprotein H                                                | IP100013881,IP100479191                                                                         | 49,211.80  | 21 | 31 | SCSADEVQRFF                     | W | S | 1,345.58 |
| 91  | EEF2 Elongation factor 2                                                                         | IP100186290                                                                                     | 95,322.10  | 21 | 32 | NMSVIAHVVDHGK                   | R | S | 1,307.65 |
| 92  | PSMA5 Proteasome subunit alpha type-5                                                            | IP100291922                                                                                     | 26,393.30  | 21 | 32 | LFQVEYAIK                       | R | L | 1,423.78 |
| 93  | HNRNPA3 Isoform 1 of Heterogeneous nuclear ribonucleoprotein A3                                  | IP100419373                                                                                     | 39,577.10  | 21 | 35 | RGEEGHDPKEPEQLR                 | R | K | 1,776.86 |
| 94  | TPT1 Tumor protein, translationally-controlled 1                                                 | IP100009943,IP100550900,IP100908553                                                             | 21,508.50  | 22 | 34 | EIADGLCLEVEGK                   | R | M | 1,432.70 |
| 95  | BAX Isoform Epsilon of Apoptosis regulator BAX                                                   | IP100071059,IP100443773,IP100444945,IP100845474,IP100885203                                     | 18,111.40  | 22 | 34 | TGALLLQGFQDR                    | K | A | 1,431.80 |
| 96  | HIST1H2AH Histone H2A type 1-H                                                                   | IP100081836,IP100216457,IP100220855,IP100255316,IP100291764,IP100339274,IP100552873,IP100902514 | 13,888.80  | 22 | 30 | AGLQFPVGR                       | R | V | 944.5313 |
| 97  | DCXR L-xylulose reductase                                                                        | IP100448095,IP100797249,IP100797917                                                             | 25,894.20  | 22 | 33 | GTVQALHATGAR                    | R | V | 1,181.64 |
| 98  | RPS5 40S ribosomal protein S5                                                                    | IP100008433                                                                                     | 22,859.00  | 23 | 42 | WSTDDVQINDISLQDYIAVK            | K | E | 2,323.15 |
| 99  | TUBA4B Putative tubulin-like protein alpha-4B                                                    | IP100017454                                                                                     | 27,533.90  | 23 | 42 | RQIFHPEQLITGKEDAANNY            | Y | A | 2,344.17 |
| 100 | ATIC Bifunctional purine biosynthesis protein PURH                                               | IP100289499                                                                                     | 64,598.50  | 23 | 39 | NLTALGLNLVASGGTAK               | R | A | 1,599.91 |
| 101 | RBMX Heterogeneous nuclear ribonucleoprotein G                                                   | IP100304692                                                                                     | 42,315.70  | 23 | 30 | ALEAVFGK                        | K | Y | 834.472  |
| 102 | PREP Prolyl endopeptidase                                                                        | IP100008164                                                                                     | 80,683.50  | 24 | 40 | ICDPYAWLEDPDSEQTK               | K | A | 2,066.90 |
| 103 | IPO4 Isoform 1 of Importin-4                                                                     | IP100156374,IP100398009                                                                         | 118,700.70 | 24 | 33 | ATEQLQIVLR                      | R | A | 1,170.68 |
| 104 | RPL14 Ribosomal protein L14 variant                                                              | IP100555744                                                                                     | 23,769.70  | 24 | 35 | LVAIVDVIDQNR                    | K | A | 1,354.77 |
| 105 | PFKP 6-phosphofructokinase type C                                                                | IP100009790                                                                                     | 85,579.40  | 26 | 44 | AIGVLTSGGDAQGMNAAVR             | K | A | 1,787.91 |
| 106 | CCT2 T-complex protein 1 subunit beta                                                            | IP100297779                                                                                     | 57,471.90  | 26 | 40 | LTSFIGAIAIGDLVK                 | R | S | 1,517.89 |
| 107 | SNAP23 Isoform SNAP-23a of Synaptosomal-associated protein 23                                    | IP100010438,IP100216231,IP100794966,IP100795000,IP100796942                                     | 23,336.80  | 27 | 40 | ILGLAIESQDAGIK                  | R | T | 1,427.81 |
| 108 | TUBA4B Putative tubulin-like protein alpha-4B                                                    | IP100017454                                                                                     | 27,533.90  | 27 | 42 | HPEQLITGKEDAANNY                | F | A | 1,799.86 |
| 109 | PRDX1 Peroxiredoxin-1                                                                            | IP100000874,IP100640741                                                                         | 22,092.90  | 28 | 35 | DISLSDYK                        | K | G | 940.4623 |
| 110 | RAB1B Ras-related protein Rab-1B                                                                 | IP100008964,IP100871366                                                                         | 22,154.00  | 28 | 46 | FADDTYTESYISTIGVDFK             | R | I | 2,172.00 |
| 111 | RAB18 Ras-related protein Rab-18                                                                 | IP100014577                                                                                     | 22,959.50  | 28 | 46 | FTDDTFDPELAATIGVDFK             | R | V | 2,102.00 |
| 112 | YWHAQ 14-3-3 protein theta                                                                       | IP100018146                                                                                     | 27,747.40  | 28 | 41 | AVTEQGAELSNEER                  | K | N | 1,532.72 |
| 113 | YWHAZ 14-3-3 protein zeta/delta                                                                  | IP100021263                                                                                     | 27,727.90  | 28 | 41 | SVTEQGAELSNEER                  | K | N | 1,548.71 |
| 114 | YWHAG 14-3-3 protein gamma                                                                       | IP100220642                                                                                     | 28,285.10  | 29 | 42 | NVTELNEPLSNEER                  | K | N | 1,643.79 |
| 115 | ALDOA Fructose-bisphosphate aldolase A                                                           | IP100465439,IP100796333                                                                         | 39,402.60  | 29 | 43 | GILAADESTGSIKR                  | K | L | 1,488.80 |
| 116 | ALDOA Fructose-bisphosphate aldolase A                                                           | IP100465439,IP100796333                                                                         | 39,402.60  | 29 | 42 | GILAADESTGSIK                   | K | R | 1,332.70 |
| 117 | YWHAE 14-3-3 protein epsilon                                                                     | IP100000816                                                                                     | 29,157.00  | 30 | 42 | VAGMDVELTVEER                   | K | N | 1,447.71 |
| 118 | HNRNPH1 Heterogeneous nuclear ribonucleoprotein H                                                | IP100013881,IP100479191                                                                         | 49,211.80  | 30 | 35 | FFSDCK                          | R | I | 803.3393 |

|     |                                                                |                                                                                                                                                                                                                                                                                     |            |    |    |                       |   |   |          |
|-----|----------------------------------------------------------------|-------------------------------------------------------------------------------------------------------------------------------------------------------------------------------------------------------------------------------------------------------------------------------------|------------|----|----|-----------------------|---|---|----------|
| 119 | UBB;RPS27A;UBC ubiquitin and ribosomal protein S27a precursor  | UPI00179330,UPI00397808,UPI00456429,UPI00719280,UPI00743241,UPI00743650,UPI00744274,UPI00784990,UPI00789107,UPI00789823,UPI00790633,UPI00792712,UPI00793330,UPI00793729,UPI00793810,UPI00794211,UPI00794925,UPI00795527,UPI00796007,UPI00796600,UPI00797400,UPI00798127,UPI00798155 | 17,947.60  | 30 | 42 | IQDKEGIPPDQQR         | K | L | 1,523.78 |
| 120 | UBB;RPS27A;UBC ubiquitin and ribosomal protein S27a precursor  | UPI00179330,UPI00397808,UPI00456429,UPI00719280,UPI00743241,UPI00743650,UPI00744274,UPI00784990,UPI00789107,UPI00789823,UPI00790633,UPI00792712,UPI00793330,UPI00793729,UPI00793810,UPI00794211,UPI00794925,UPI00795527,UPI00796007,UPI00796600,UPI00797400,UPI00798127,UPI00798155 | 17,949.70  | 30 | 42 | IQDKEGIPPDQQR         | K | L | 1,523.78 |
| 121 | UBB;RPS27A;UBC ubiquitin and ribosomal protein S27a precursor  | UPI00179330,UPI00397808,UPI00456429,UPI00719280,UPI00743241,UPI00743650,UPI00744274,UPI00784990,UPI00789107,UPI00789823,UPI00790633,UPI00792712,UPI00793330,UPI00793729,UPI00793810,UPI00794211,UPI00794925,UPI00795527,UPI00796007,UPI00796600,UPI00797400,UPI00798127,UPI00798155 | 17,947.60  | 30 | 42 | IQDKEGIPPDQQR         | K | L | 1,523.78 |
| 122 | UBB;RPS27A;UBC ubiquitin and ribosomal protein S27a precursor  | UPI00179330,UPI00397808,UPI00456429,UPI00719280,UPI00743241,UPI00743650,UPI00744274,UPI00784990,UPI00789107,UPI00789823,UPI00790633,UPI00792712,UPI00793330,UPI00793729,UPI00793810,UPI00794211,UPI00794925,UPI00795527,UPI00796007,UPI00796600,UPI00797400,UPI00798127,UPI00798155 | 17,947.60  | 30 | 42 | IQDKEGIPPDQQR         | K | L | 1,523.78 |
| 123 | PTBP1 polypyrimidine tract-binding protein 1 isoform a         | UPI00183626,UPI00334175                                                                                                                                                                                                                                                             | 59,616.40  | 30 | 47 | IMSSNSASAANGNDSKKF    | F | K | 1,828.85 |
| 124 | YWHAB Isoform Long of 14-3-3 protein beta/alpha                | UPI00216318,UPI00759832                                                                                                                                                                                                                                                             | 28,065.10  | 30 | 43 | AVTEQGHLSNEER         | K | N | 1,598.74 |
| 125 | XPOT Exportin-T                                                | UPI00306290                                                                                                                                                                                                                                                                         | 109,948.60 | 30 | 45 | ISPDQVQVCAEALAQR      | K | T | 1,814.89 |
| 126 | SURF4 Isoform 1 of Surfeit locus protein 4                     | UPI00005737,UPI00399142,UPI00641719                                                                                                                                                                                                                                                 | 30,377.40  | 31 | 43 | LCLISTFLEDGIR         | R | M | 1,536.81 |
| 127 | UBB;RPS27A;UBC ubiquitin and ribosomal protein S27a precursor  | UPI00179330,UPI00397808,UPI00456429,UPI00719280,UPI00743241,UPI00743650,UPI00744274,UPI00784990,UPI00789107,UPI00789823,UPI00790633,UPI00792712,UPI00793330,UPI00793729,UPI00793810,UPI00794211,UPI00794925,UPI00795527,UPI00796007,UPI00796600,UPI00797400,UPI00798127,UPI00798155 | 12,234.60  | 31 | 43 | IQDKEGIPPDQQR         | K | L | 1,523.78 |
| 128 | RPL12 Isoform 1 of 60S ribosomal protein L12                   | UPI00024933                                                                                                                                                                                                                                                                         | 17,801.10  | 32 | 40 | IGPLGLSPK             | K | K | 881.5457 |
| 129 | NUP107 Nuclear pore complex protein Nup107                     | UPI00028005                                                                                                                                                                                                                                                                         | 106,358.70 | 32 | 48 | VLLQASQDENFGNTTPR     | R | N | 1,889.94 |
| 130 | COPZ1 Coatomer subunit zeta-1                                  | UPI00032851,UPI00790808,UPI00791413,UPI00792095,UPI00792696                                                                                                                                                                                                                         | 6,653.30   | 32 | 47 | RGEDVPLTEQTVSQVL      | L | Q | 1,770.92 |
| 131 | NUP93 Nuclear pore complex protein Nup93                       | UPI00397904                                                                                                                                                                                                                                                                         | 93,473.20  | 32 | 42 | NLQEIQQAGER           | R | L | 1,285.65 |
| 132 | ENO1 Isoform alpha-enolase of Alpha-enolase                    | UPI00465248                                                                                                                                                                                                                                                                         | 47,152.20  | 32 | 44 | RAAVPSGASTGIY         | F | E | 1,249.65 |
| 133 | CORO1C cDNA FLJ50992, highly similar to Coronin 1C             | UPI00798401,UPI00867509                                                                                                                                                                                                                                                             | 49,361.90  | 32 | 44 | VTWDSDFCAVNPR         | R | F | 1,538.71 |
| 134 | EEF2 Elongation factor 2                                       | UPI00186290                                                                                                                                                                                                                                                                         | 95,322.10  | 33 | 42 | STLTDLSLVCK           | K | A | 1,123.57 |
| 135 | NPM1 Isoform 2 of Nucleophosmin                                | UPI00220740,UPI00549248                                                                                                                                                                                                                                                             | 29,446.90  | 33 | 45 | VDNDENHQLSLR          | K | T | 1,568.73 |
| 136 | PARK7 Protein DJ-1                                             | UPI00298547                                                                                                                                                                                                                                                                         | 19,873.10  | 33 | 48 | VTVAGLAGKDPVQCSR      | K | D | 1,657.87 |
| 137 | TCEA1 Isoform 1 of Transcription elongation factor A protein 1 | UPI00333215                                                                                                                                                                                                                                                                         | 33,952.60  | 33 | 45 | NIPMTLELLQSTR         | K | I | 1,515.82 |
| 138 | ENO1 Isoform alpha-enolase of Alpha-enolase                    | UPI00465248                                                                                                                                                                                                                                                                         | 47,152.20  | 33 | 50 | AAVPSGASTGIYEALRLR    | R | D | 1,804.94 |
| 139 | PTGES3 Prostaglandin E synthase 3                              | UPI00015029,UPI00789101,UPI00789698,UPI00790462,UPI00908647                                                                                                                                                                                                                         | 18,679.90  | 34 | 48 | SKLTFSCLLGGSDNFK      | K | H | 1,660.80 |
| 140 | SEC23A Protein transport protein Sec23A                        | UPI00017375                                                                                                                                                                                                                                                                         | 86,144.60  | 34 | 46 | MVVPVAALFTPLK         | R | E | 1,385.82 |
| 141 | IPO4 Isoform 1 of Importin-4                                   | UPI00156374,UPI00398009                                                                                                                                                                                                                                                             | 118,700.70 | 34 | 54 | APAALPALCDLLASAADPQIR | R | Q | 2,134.13 |
| 142 | HIST1H1C Histone H1.2                                          | UPI00217465,UPI00217466,UPI00217467                                                                                                                                                                                                                                                 | 21,347.80  | 34 | 46 | KASGPPVSELITK         | R | A | 1,326.76 |
| 143 | HIST1H1C Histone H1.2                                          | UPI00217465,UPI00217466,UPI00217467                                                                                                                                                                                                                                                 | 21,848.90  | 34 | 46 | KASGPPVSELITK         | R | A | 1,326.76 |
| 144 | SLC25A5 ADP/ATP translocase 2                                  | UPI00007188                                                                                                                                                                                                                                                                         | 32,878.50  | 35 | 51 | LLQVQHASKQITADKQY     | L | K | 1,971.07 |
| 145 | HIST1H1C Histone H1.2                                          | UPI00217465,UPI00217466,UPI00217467                                                                                                                                                                                                                                                 | 21,347.80  | 35 | 46 | ASGPPVSELITK          | K | A | 1,198.67 |
| 146 | SLC25A6 ADP/ATP translocase 3                                  | UPI00291467                                                                                                                                                                                                                                                                         | 32,849.10  | 35 | 51 | LLQVQHASKQIADKQY      | L | K | 1,941.06 |
| 147 | DHX9 ATP-dependent RNA helicase A                              | UPI00844578                                                                                                                                                                                                                                                                         | 140,943.50 | 35 | 43 | MCEVQVEGY             | F | N | 1,114.45 |
| 148 | HNRNPH1 Heterogeneous nuclear ribonucleoprotein H              | UPI00013881,UPI00479191                                                                                                                                                                                                                                                             | 49,211.80  | 36 | 44 | IQNGAQQGIR            | K | F | 956.5273 |
| 149 | HSPA8 Isoform 1 of Heat shock cognate 71 kDa protein           | UPI00003865                                                                                                                                                                                                                                                                         | 70,881.80  | 37 | 49 | TTPSYVAFTDTER         | R | L | 1,487.70 |
| 150 | TUBB2C Tubulin beta-2C chain                                   | UPI00007752                                                                                                                                                                                                                                                                         | 49,812.70  | 37 | 50 | HGSDSLQLERINVY        | Y | Y | 1,658.81 |
| 151 | TUBB Tubulin beta chain                                        | UPI00011654                                                                                                                                                                                                                                                                         | 49,652.60  | 37 | 50 | HGSDSLQLDRISVY        | Y | Y | 1,617.79 |
| 152 | CDC2 Putative uncharacterized protein DKFZp686L20222           | UPI00026689                                                                                                                                                                                                                                                                         | 34,762.10  | 37 | 52 | IRLESEEEGVPSTAIR      | K | E | 1,785.93 |
| 153 | RPL9 60S ribosomal protein L9                                  | UPI00031691,UPI00795717                                                                                                                                                                                                                                                             | 21,845.70  | 37 | 50 | DFNHINVELSLLGK        | R | K | 1,598.85 |
| 154 | XRCC5 ATP-dependent DNA helicase 2 subunit 2                   | UPI00220834,UPI00871391                                                                                                                                                                                                                                                             | 82,689.10  | 37 | 44 | VITMFVQR              | K | Q | 993.555  |
| 155 | HSPA1A;HSPA1B Heat shock 70 kDa protein 1                      | UPI00304925                                                                                                                                                                                                                                                                         | 70,036.00  | 37 | 49 | TTPSYVAFTDTER         | R | L | 1,487.70 |

|     |                                                                                            |                                                                                                                                                                                                                                                                                     |            |    |    |                                  |   |   |          |
|-----|--------------------------------------------------------------------------------------------|-------------------------------------------------------------------------------------------------------------------------------------------------------------------------------------------------------------------------------------------------------------------------------------|------------|----|----|----------------------------------|---|---|----------|
| 156 | HNRNPK Isoform 1 of Heterogeneous nuclear ribonucleoprotein K                              | IP100216049,IP100216746,IP100514561,IP100807545,IP100910458                                                                                                                                                                                                                         | 50,960.50  | 38 | 46 | NTDEMVELR                        | R | I | 1,106.51 |
| 157 | EEF1A1 Elongation factor 1-alpha 1                                                         | IP100396485                                                                                                                                                                                                                                                                         | 50,123.20  | 38 | 51 | TIEKFEKEAAEMGK                   | R | G | 1,610.81 |
| 158 | HSPD1 60 kDa heat shock protein, mitochondrial                                             | IP100784154                                                                                                                                                                                                                                                                         | 61,037.70  | 38 | 58 | ALMLQGVDLLADAVAVTMGP<br>K        | R | G | 2,113.14 |
| 159 | RPL11 Isoform 1 of 60S ribosomal protein L11                                               | IP100376798                                                                                                                                                                                                                                                                         | 20,235.20  | 39 | 52 | VLEQLTGQTPVFSK                   | K | A | 1,546.85 |
| 160 | TFRC Transferrin receptor protein 1                                                        | IP100022462                                                                                                                                                                                                                                                                         | 84,855.60  | 40 | 53 | LAVDEEENADNNTK                   | K | A | 1,561.70 |
| 161 | PFKM Isoform 2 of 6-phosphofructokinase, muscle type                                       | IP100219585,IP100465179,IP100743142                                                                                                                                                                                                                                                 | 81,758.50  | 40 | 47 | VGIFTGAR                         | R | V | 820.4676 |
| 162 | TUBA1A Tubulin alpha-1A chain                                                              | IP100180675                                                                                                                                                                                                                                                                         | 50,117.70  | 41 | 60 | TIGGGDDSFNTFFSETGAGK             | K | H | 2,007.89 |
| 163 | GEMIN5 Gem-associated protein 5                                                            | IP100291783                                                                                                                                                                                                                                                                         | 168,544.60 | 41 | 55 | VGPGAGESPGTPPFR                  | R | V | 1,425.71 |
| 164 | PSMB2 Proteasome subunit beta type-2                                                       | IP100028006                                                                                                                                                                                                                                                                         | 22,819.50  | 42 | 62 | ILLLCVGEAGDTVQFAEYIQK            | K | N | 2,367.23 |
| 165 | HSP90AB1 Heat shock protein HSP 90-beta                                                    | IP100414676                                                                                                                                                                                                                                                                         | 83,249.30  | 42 | 55 | ELISNASDALDKIR                   | R | Y | 1,544.83 |
| 166 | CNPB Isoform 1 of Cellular nucleic acid-binding protein                                    | IP100430812,IP100430813,IP100895785,IP100895806,IP100895852,IP100895911                                                                                                                                                                                                             | 19,444.10  | 42 | 56 | GFQFVSSSLPDICYR                  | R | C | 1,775.84 |
| 167 | KPNB1 Importin subunit beta-1                                                              | IP100001639                                                                                                                                                                                                                                                                         | 97,153.30  | 43 | 54 | VLANPGENSQVAR                    | R | V | 1,225.66 |
| 168 | KPNB1 Importin subunit beta-1                                                              | IP100001639                                                                                                                                                                                                                                                                         | 97,153.30  | 43 | 54 | VLANPGENSQVAR                    | R | V | 1,225.66 |
| 169 | KPNB1 Importin subunit beta-1                                                              | IP100001639                                                                                                                                                                                                                                                                         | 97,153.30  | 43 | 54 | VLANPGENSQVAR                    | R | V | 1,225.66 |
| 170 | UBB;RPS27A;UBC ubiquitin and ribosomal protein S27a precursor                              | IP100179330,IP100397808,IP100456429,IP100719280,IP100743241,IP100743650,IP100744274,IP100784990,IP100789107,IP100789823,IP100790633,IP100792712,IP100793330,IP100793729,IP100793810,IP100794211,IP100794925,IP100795527,IP100796007,IP100796600,IP100797400,IP100798127,IP100798155 | 17,947.60  | 43 | 48 | LIFAGK                           | R | Q | 648.408  |
| 171 | UBB;RPS27A;UBC ubiquitin and ribosomal protein S27a precursor                              | IP100179330,IP100397808,IP100456429,IP100719280,IP100743241,IP100743650,IP100744274,IP100784990,IP100789107,IP100789823,IP100790633,IP100792712,IP100793330,IP100793729,IP100793810,IP100794211,IP100794925,IP100795527,IP100796007,IP100796600,IP100797400,IP100798127,IP100798155 | 17,947.60  | 44 | 56 | IFAGKQLEDGRTL                    | L | S | 1,447.79 |
| 172 | UBB;RPS27A;UBC ubiquitin and ribosomal protein S27a precursor                              | IP100179330,IP100397808,IP100456429,IP100719280,IP100743241,IP100743650,IP100744274,IP100784990,IP100789107,IP100789823,IP100790633,IP100792712,IP100793330,IP100793729,IP100793810,IP100794211,IP100794925,IP100795527,IP100796007,IP100796600,IP100797400,IP100798127,IP100798155 | 17,947.60  | 44 | 56 | IFAGKQLEDGRTL                    | L | S | 1,447.79 |
| 173 | TCP1 T-complex protein 1 subunit alpha                                                     | IP100290566                                                                                                                                                                                                                                                                         | 60,327.20  | 44 | 63 | MLVDDIGDVTITNDGATILK             | K | L | 2,104.08 |
| 174 | TP11 Isoform 1 of Triosephosphate isomerase                                                | IP100465028                                                                                                                                                                                                                                                                         | 30,772.80  | 44 | 51 | FFVGGNWK                         | K | M | 954.4832 |
| 175 | PKM2 cDNA FLJ53368, highly similar to Pyruvate kinase isozymes M1/M2                       | IP100847989                                                                                                                                                                                                                                                                         | 49,880.20  | 44 | 56 | NTGIICIGPASR                     | R | S | 1,359.71 |
| 176 | ATP6V1A V-type proton ATPase catalytic subunit A                                           | IP100007682                                                                                                                                                                                                                                                                         | 68,287.40  | 45 | 56 | VGHSELVGEIIR                     | R | L | 1,308.73 |
| 177 | LOC442497;SLC3A2 4F2 cell-surface antigen heavy chain                                      | IP100027493,IP100554481,IP100554611,IP100554702,IP100554722,IP100604710                                                                                                                                                                                                             | 57,929.40  | 45 | 59 | IKVAEDEAEAAAAAK                  | K | F | 1,486.77 |
| 178 | HSPA1A;HSPA1B Heat shock 70 kDa protein 1                                                  | IP100304925                                                                                                                                                                                                                                                                         | 70,036.00  | 45 | 68 | TDTERLIGDAAKNQVALNPQN<br>TVF     | F | D | 2,615.34 |
| 179 | TTL3 cDNA FLJ14048 fis, clone HEMBA1006650, weakly similar to ARP2/3 COMPLEX 20 KD SUBUNIT | IP100386354,IP100554811,IP100790262                                                                                                                                                                                                                                                 | 19,649.40  | 45 | 55 | ELLLQPVITISR                     | K | N | 1,268.76 |
| 180 | CFL1 Cofilin-1                                                                             | IP100012011,IP100909841                                                                                                                                                                                                                                                             | 18,485.10  | 46 | 73 | NIILEEGKEILVGDVGQTVDDP<br>YATFVK | K | M | 3,062.59 |
| 181 | UBB;RPS27A;UBC ubiquitin and ribosomal protein S27a precursor                              | IP100179330,IP100397808,IP100456429,IP100719280,IP100743241,IP100743650,IP100744274,IP100784990,IP100789107,IP100789823,IP100790633,IP100792712,IP100793330,IP100793729,IP100793810,IP100794211,IP100794925,IP100795527,IP100796007,IP100796600,IP100797400,IP100798127,IP100798155 | 17,947.60  | 46 | 59 | AGKQLEDGRTLSDY                   | F | N | 1,552.76 |
| 182 | GAPDH Glyceraldehyde-3-phosphate dehydrogenase                                             | IP100219018,IP100795257                                                                                                                                                                                                                                                             | 36,035.30  | 46 | 56 | MFQYDSTHGKF                      | Y | H | 1,376.59 |
| 183 | GSTP1 Glutathione S-transferase P                                                          | IP100219757                                                                                                                                                                                                                                                                         | 23,338.70  | 46 | 55 | ASCLYQLPK                        | K | F | 1,136.58 |
| 184 | TUBB2C Tubulin beta-2C chain                                                               | IP100007752                                                                                                                                                                                                                                                                         | 49,812.70  | 47 | 58 | INVYYNEATGGK                     | R | Y | 1,328.65 |
| 185 | TUBB Tubulin beta chain                                                                    | IP100011654                                                                                                                                                                                                                                                                         | 49,652.60  | 47 | 58 | ISVYYNEATGGK                     | R | Y | 1,301.64 |
| 186 | PCBP2 poly(rC) binding protein 2 isoform b                                                 | IP100012066,IP100470509,IP100791223,IP100796337                                                                                                                                                                                                                                     | 38,204.50  | 47 | 57 | INISEGNCPER                      | R | I | 1,288.60 |
| 187 | PCBP2 poly(rC) binding protein 2 isoform b                                                 | IP100012066,IP100470509,IP100791223,IP100796337                                                                                                                                                                                                                                     | 38,204.50  | 47 | 57 | INISEGNCPER                      | R | I | 1,288.60 |
| 188 | PCBP2 poly(rC) binding protein 2 isoform b                                                 | IP100012066,IP100470509,IP100791223,IP100796337                                                                                                                                                                                                                                     | 38,204.50  | 47 | 57 | INISEGNCPER                      | R | I | 1,288.60 |
| 189 | OCIAD1 Isoform 1 of OCIA domain-containing protein 1                                       | IP100016405,IP100816371,IP100816523                                                                                                                                                                                                                                                 | 27,608.80  | 47 | 64 | SVPLAATSMILITQGLISK              | R | G | 1,830.04 |
| 190 | PCBP1 Poly(rC)-binding protein 1                                                           | IP100016610                                                                                                                                                                                                                                                                         | 37,480.20  | 47 | 57 | INISEGNCPER                      | R | I | 1,288.60 |

|     |                                                                                                                    |                                                                                                                                                                                                                                                                                     |            |    |    |                      |   |   |          |
|-----|--------------------------------------------------------------------------------------------------------------------|-------------------------------------------------------------------------------------------------------------------------------------------------------------------------------------------------------------------------------------------------------------------------------------|------------|----|----|----------------------|---|---|----------|
| 191 | LOC442497;SLC3A2 4F2 cell-surface antigen heavy chain                                                              | IPI00027493,IPI00554481,IPI00554611,IPI00554702,IPI00554722,IPI00604710                                                                                                                                                                                                             | 57,929.40  | 47 | 59 | VAEDEAEAAAAAK        | K | F | 1,245.60 |
| 192 | ACTR1A Alpha-centractin                                                                                            | IPI00029468,IPI00908883                                                                                                                                                                                                                                                             | 42,597.20  | 47 | 61 | VMAGALEGDIFIGPK      | R | A | 1,517.80 |
| 193 | TUBB2B Tubulin beta-2B chain                                                                                       | IPI00031370                                                                                                                                                                                                                                                                         | 49,935.10  | 47 | 62 | INVYYNEATGNKYVPR     | R | A | 1,900.96 |
| 194 | CDC123 Cell division cycle protein 123 homolog                                                                     | IPI00005670,IPI00514175,IPI00514360                                                                                                                                                                                                                                                 | 35,847.50  | 48 | 62 | VQEAINSLGGSVFPK      | K | L | 1,545.83 |
| 195 | NAT13 Isoform 1 of N-acetyltransferase 13                                                                          | IPI00018627                                                                                                                                                                                                                                                                         | 19,380.90  | 48 | 62 | LAYFNDAVAVCCR        | K | V | 1,728.82 |
| 196 | AASDHPPT L-aminoadipate-semialdehyde dehydrogenase-phosphopantetheinyl transferase RPL24 60S ribosomal protein L24 | IPI00250297                                                                                                                                                                                                                                                                         | 35,759.10  | 48 | 55 | IGQFVFAR             | R | D | 937.5254 |
| 197 | CCT3 chaperonin containing TCP1, subunit 3 isoform b                                                               | IPI00306332,IPI00791426,IPI00793696,IPI00873403                                                                                                                                                                                                                                     | 17,761.50  | 48 | 56 | QINWTVLYR            | R | R | 1,192.65 |
| 198 | HSDL2 Isoform 2 of Hydroxysteroid dehydrogenase-like protein 2                                                     | IPI00290770,IPI00553185                                                                                                                                                                                                                                                             | 60,446.30  | 49 | 68 | MLLDPMGGIVMTNDGNAILR | K | E | 2,131.07 |
| 199 | RBMX Heterogeneous nuclear ribonucleoprotein G                                                                     | IPI00031107,IPI00414384                                                                                                                                                                                                                                                             | 37,303.60  | 50 | 67 | LLGTIYTAAEEIEAVGGK   | K | A | 1,834.98 |
| 200 | PABPC1 Isoform 1 of Polyadenylate-binding protein 1                                                                | IPI00304692                                                                                                                                                                                                                                                                         | 42,315.70  | 50 | 63 | GFAFVTFESPADAK       | R | D | 1,486.72 |
| 201 | ACTG1 Actin, cytoplasmic 2                                                                                         | IPI00008524,IPI00410017                                                                                                                                                                                                                                                             | 70,653.30  | 51 | 67 | SLGYAYVNFQQPADAER    | R | A | 1,928.91 |
| 202 | TIMM23 Mitochondrial import inner membrane translocase subunit Tim23                                               | IPI00021440                                                                                                                                                                                                                                                                         | 41,775.90  | 51 | 62 | DSYVGDEAQSQR         | K | G | 1,354.62 |
| 203 | CKB Creatine kinase B-type                                                                                         | IPI00007309                                                                                                                                                                                                                                                                         | 21,926.20  | 52 | 68 | YLVQDTEFILPTGANK     | R | T | 1,923.97 |
| 204 | TROVE2 Isoform Long of 60 kDa SS-A/Ro ribonucleoprotein                                                            | IPI00022977,IPI00908811                                                                                                                                                                                                                                                             | 42,627.10  | 52 | 68 | TLDDVIQGTVDNPGHPY    | F | I | 1,840.87 |
| 205 | FDFT1 Squalene synthetase                                                                                          | IPI00019450,IPI00642416,IPI00646322,IPI00646813                                                                                                                                                                                                                                     | 60,654.10  | 53 | 63 | LGLENAEALIR          | K | L | 1,198.68 |
| 206 | CCT7 T-complex protein 1 subunit eta                                                                               | IPI00020944,IPI00797743,IPI00908715                                                                                                                                                                                                                                                 | 48,098.40  | 53 | 66 | SFAAVIQALDGEMR       | R | N | 1,507.76 |
| 207 | NUDC Nuclear migration protein nudC                                                                                | IPI00018465                                                                                                                                                                                                                                                                         | 59,349.80  | 54 | 67 | GKATISNDGATILK       | R | L | 1,388.77 |
| 208 | IPO4 Isoform 1 of Importin-4                                                                                       | IPI00550746,IPI00871312                                                                                                                                                                                                                                                             | 38,225.70  | 54 | 68 | LITQTFSHHNQLAQK      | K | T | 1,765.93 |
| 209 | UBB;RPS27A;UBC ubiquitin and ribosomal protein S27a precursor                                                      | IPI00156374,IPI00398009                                                                                                                                                                                                                                                             | 118,700.70 | 55 | 62 | QFAAVLTR             | R | R | 905.5203 |
| 210 | RPS10 40S ribosomal protein S10                                                                                    | IPI00179330,IPI00397808,IPI00456429,IPI00719280,IPI00743241,IPI00743650,IPI00744274,IPI00784990,IPI00789107,IPI00789823,IPI00790633,IPI00792712,IPI00793330,IPI00793729,IPI00793810,IPI00794211,IPI00794925,IPI00795527,IPI00796007,IPI00796600,IPI00797400,IPI00798127,IPI00798155 | 17,947.60  | 55 | 63 | TLSDYNIQK            | R | E | 1,081.55 |
| 211 | HNRNPH3 Isoform 1 of Heterogeneous nuclear ribonucleoprotein H3                                                    | IPI00008438,IPI00749512                                                                                                                                                                                                                                                             | 18,880.30  | 56 | 65 | GYVKEQFAWR           | R | H | 1,283.65 |
| 212 | RAB7A Ras-related protein Rab-7a                                                                                   | IPI00013877,IPI00216492,IPI00216493                                                                                                                                                                                                                                                 | 36,909.60  | 56 | 67 | STGEAFVQFASK         | R | E | 1,271.63 |
| 213 | STUB1 Isoform 1 of STIP1 homology and U box-containing protein 1                                                   | IPI00016342                                                                                                                                                                                                                                                                         | 23,472.00  | 56 | 69 | LVTMQIWDTAGQER       | R | F | 1,647.82 |
| 214 | GNPNAT1 Glucosamine 6-phosphate N-acetyltransferase                                                                | IPI00025156                                                                                                                                                                                                                                                                         | 34,839.00  | 56 | 66 | NPLVAVYYTNR          | R | A | 1,309.69 |
| 215 | GSTP1 Glutathione S-transferase P                                                                                  | IPI00061525                                                                                                                                                                                                                                                                         | 20,731.30  | 56 | 73 | VLGQLTETGVVSPEQFMK   | K | S | 1,963.02 |
| 216 | HSP90AB1 Heat shock protein HSP 90-beta                                                                            | IPI00219757                                                                                                                                                                                                                                                                         | 23,338.70  | 56 | 71 | FQDGDLTLYQSNTILR     | K | H | 1,883.95 |
| 217 | TPI1 Isoform 1 of Triosephosphate isomerase                                                                        | IPI00414676                                                                                                                                                                                                                                                                         | 83,249.30  | 56 | 69 | YESLTDPSKLD SGK      | R | E | 1,539.75 |
| 218 | HSPA8 Isoform 1 of Heat shock cognate 71 kDa protein                                                               | IPI00465028                                                                                                                                                                                                                                                                         | 30,772.80  | 56 | 70 | KQSLGELIGTLNAAK      | R | V | 1,542.89 |
| 219 | RPL18A 60S ribosomal protein L18a                                                                                  | IPI00003865                                                                                                                                                                                                                                                                         | 70,881.80  | 57 | 71 | NQVAMNPTNTV F DAK    | K | R | 1,649.80 |
| 220 | HSPA1A;HSPA1B Heat shock 70 kDa protein 1                                                                          | IPI00026202,IPI00847774,IPI00872093                                                                                                                                                                                                                                                 | 20,744.60  | 57 | 70 | SSGEIVYCGQVFEK       | K | S | 1,602.75 |
| 221 | HSPA1A;HSPA1B Heat shock 70 kDa protein 1                                                                          | IPI00304925                                                                                                                                                                                                                                                                         | 70,036.00  | 57 | 72 | NQVALNPQNTV F DAKR   | K | L | 1,814.95 |
| 222 | TPI1 Isoform 1 of Triosephosphate isomerase                                                                        | IPI00304925                                                                                                                                                                                                                                                                         | 70,036.00  | 57 | 71 | NQVALNPQNTV F DAK    | K | R | 1,658.85 |
| 223 | TPI1 Isoform 1 of Triosephosphate isomerase                                                                        | IPI00465028                                                                                                                                                                                                                                                                         | 30,772.80  | 57 | 70 | QSLGELIGTLNAAK       | K | V | 1,414.79 |
| 224 | TPI1 Isoform 1 of Triosephosphate isomerase                                                                        | IPI00465028                                                                                                                                                                                                                                                                         | 30,772.80  | 57 | 70 | QSLGELIGTLNAAK       | K | V | 1,414.79 |
| 225 | RAB1B Ras-related protein Rab-1B                                                                                   | IPI00008964,IPI00871366                                                                                                                                                                                                                                                             | 22,154.00  | 59 | 69 | LQIWDTAGQER          | K | F | 1,316.66 |
| 226 | RPS7 40S ribosomal protein S7                                                                                      | IPI00013415                                                                                                                                                                                                                                                                         | 22,109.50  | 59 | 70 | AIIIFVVPVQLK         | K | S | 1,337.86 |
| 227 | RAB18 Ras-related protein Rab-18                                                                                   | IPI00014577                                                                                                                                                                                                                                                                         | 22,959.50  | 59 | 69 | LAIWDTAGQER          | K | F | 1,259.64 |
| 228 | FASN Fatty acid synthase                                                                                           | IPI00026781                                                                                                                                                                                                                                                                         | 273,382.00 | 60 | 70 | FDASFFGVHPK          | R | Q | 1,251.62 |
| 229 | FASN Fatty acid synthase                                                                                           | IPI00026781                                                                                                                                                                                                                                                                         | 273,382.00 | 60 | 70 | FDASFFGVHPK          | R | Q | 1,251.62 |
| 230 | ARF1 ADP-ribosylation factor 1                                                                                     | IPI00215914,IPI00215917                                                                                                                                                                                                                                                             | 20,679.60  | 60 | 73 | NISFTVWDVGGQDK       | K | I | 1,565.76 |
| 231 | RPP40 Ribonuclease P 40kDa subunit                                                                                 | IPI00332091,IPI00478496                                                                                                                                                                                                                                                             | 39,310.30  | 60 | 67 | VMNTGPYY             | L | F | 944.4182 |
| 232 | IPO5 importin 5                                                                                                    | IPI00793443                                                                                                                                                                                                                                                                         | 125,529.30 | 60 | 68 | ITFLLQAIR            | K | N | 1,074.67 |

|     |                                                                                         |                                                                                                                                                                                                                                                                                     |            |    |    |                           |   |   |          |
|-----|-----------------------------------------------------------------------------------------|-------------------------------------------------------------------------------------------------------------------------------------------------------------------------------------------------------------------------------------------------------------------------------------|------------|----|----|---------------------------|---|---|----------|
| 233 | YWHAE 14-3-3 protein epsilon                                                            | IPI00000816                                                                                                                                                                                                                                                                         | 29,157.00  | 61 | 85 | RIISSIEQKEENKGGEDKMKI REY | W | R | 2,993.57 |
| 234 | ILF2 Interleukin enhancer-binding factor 2                                              | IPI00005198                                                                                                                                                                                                                                                                         | 43,044.70  | 61 | 80 | NQDLAPNSAEQASILSLVTK      | R | I | 2,099.10 |
| 235 | SSB Lupus La protein                                                                    | IPI00009032,IPI00916802                                                                                                                                                                                                                                                             | 46,821.00  | 61 | 74 | LTTDFNVIVEALSK            | R | S | 1,549.85 |
| 236 | YWHAZ 14-3-3 protein zeta/delta                                                         | IPI00021263                                                                                                                                                                                                                                                                         | 27,727.90  | 61 | 74 | VVSSIEQKTEGAEK            | R | K | 1,504.79 |
| 237 | YWHAZ 14-3-3 protein zeta/delta                                                         | IPI00021263                                                                                                                                                                                                                                                                         | 27,727.90  | 61 | 75 | VVSSIEQKTEGAEKK           | R | Q | 1,632.88 |
| 238 | YWHAE 14-3-3 protein epsilon                                                            | IPI00000816                                                                                                                                                                                                                                                                         | 29,157.00  | 62 | 73 | IISSIEQKEENK              | R | G | 1,417.75 |
| 239 | MAT2A S-adenosylmethionine synthetase isoform type-2                                    | IPI00010157                                                                                                                                                                                                                                                                         | 43,642.80  | 62 | 74 | TGMILLAGEITSR             | K | A | 1,361.75 |
| 240 | RAB11B Ras-related protein Rab-11B                                                      | IPI00020436,IPI00429190,IPI00795676                                                                                                                                                                                                                                                 | 24,471.00  | 62 | 72 | AQIWDTAGQER               | K | Y | 1,274.61 |
| 242 | RRM2 Ribonucleoside-diphosphate reductase M2 subunit                                    | IPI00011118                                                                                                                                                                                                                                                                         | 51,076.50  | 63 | 77 | SLRVPLAPITDPQQL           | L | Q | 1,647.94 |
| 243 | TUBB Tubulin beta chain                                                                 | IPI00011654                                                                                                                                                                                                                                                                         | 49,652.60  | 63 | 77 | AILDVLEPGTMDSVR           | R | S | 1,615.84 |
| 244 | TUBB Tubulin beta chain                                                                 | IPI00011654                                                                                                                                                                                                                                                                         | 49,652.60  | 63 | 77 | AILDVLEPGTMDSVR           | R | S | 1,615.84 |
| 245 | LMNA Isoform A of Lamin-A/C                                                             | IPI00021405,IPI00216952,IPI00216953,IPI00514204,IPI00644087,IPI00655812                                                                                                                                                                                                             | 74,122.60  | 63 | 72 | ITESEEVVSR                | R | E | 1,148.58 |
| 246 | YWHAB Isoform Long of 14-3-3 protein beta/alpha                                         | IPI00216318,IPI00759832                                                                                                                                                                                                                                                             | 28,065.10  | 63 | 73 | VISSIEQKTER               | R | N | 1,289.71 |
| 247 | PEBP1 Phosphatidylethanolamine-binding protein 1                                        | IPI00219446                                                                                                                                                                                                                                                                         | 21,038.90  | 63 | 76 | LYTLVLTDPDAPSR            | K | K | 1,560.83 |
| 248 | CCT8 59 kDa protein                                                                     | IPI00302925,IPI00784090                                                                                                                                                                                                                                                             | 59,460.90  | 63 | 74 | LFVTNDAATILR              | K | E | 1,333.75 |
| 249 | AK1 Adenylate kinase isoenzyme 1                                                        | IPI00018342,IPI00640817                                                                                                                                                                                                                                                             | 21,617.10  | 64 | 77 | GQLVPLETVLDMRLR           | K | D | 1,583.88 |
| 250 | UBB;RPS27A;UBC ubiquitin and ribosomal protein S27a precursor                           | IPI00179330,IPI00397808,IPI00456429,IPI00719280,IPI00743241,IPI00743650,IPI00744274,IPI00784990,IPI00789107,IPI00789823,IPI00790633,IPI00792712,IPI00793330,IPI00793729,IPI00793810,IPI00794211,IPI00794925,IPI00795527,IPI00796007,IPI00796600,IPI00797400,IPI00798127,IPI00798155 | 17,947.60  | 64 | 72 | ESTLHLVLR                 | K | L | 1,067.62 |
| 251 | UBB;RPS27A;UBC ubiquitin and ribosomal protein S27a precursor                           | IPI00179330,IPI00397808,IPI00456429,IPI00719280,IPI00743241,IPI00743650,IPI00744274,IPI00784990,IPI00789107,IPI00789823,IPI00790633,IPI00792712,IPI00793330,IPI00793729,IPI00793810,IPI00794211,IPI00794925,IPI00795527,IPI00796007,IPI00796600,IPI00797400,IPI00798127,IPI00798155 | 17,949.70  | 64 | 72 | ESTLHLVLR                 | K | L | 1,067.62 |
| 252 | UBE2S Ubiquitin-conjugating enzyme E2 S                                                 | IPI00217949,IPI00878120                                                                                                                                                                                                                                                             | 23,828.40  | 64 | 76 | LLLGKDFPASPPK             | K | G | 1,382.80 |
| 253 | DHX9 ATP-dependent RNA helicase A                                                       | IPI00844578                                                                                                                                                                                                                                                                         | 140,943.50 | 64 | 71 | DFVNYLVR                  | R | I | 1,025.54 |
| 254 | PCNA Proliferating cell nuclear antigen                                                 | IPI00021700                                                                                                                                                                                                                                                                         | 28,751.30  | 65 | 77 | NLAMGVNLTSMK              | R | I | 1,365.69 |
| 255 | TRAPP5 Trafficking protein particle complex subunit 5                                   | IPI00177509                                                                                                                                                                                                                                                                         | 20,765.40  | 65 | 72 | VLDALVAR                  | R | E | 856.5251 |
| 256 | TUBA1A Tubulin alpha-1A chain                                                           | IPI00180675                                                                                                                                                                                                                                                                         | 50,117.70  | 65 | 79 | AVFVDLEPTVIDEVR           | R | T | 1,701.91 |
| 257 | PTBP1 polypyrimidine tract-binding protein 1 isoform a                                  | IPI00183626,IPI00334175                                                                                                                                                                                                                                                             | 59,616.40  | 65 | 84 | KLPIDVTEGEVISLGLPFGK      | R | V | 2,112.20 |
| 258 | HIST1H1C Histone H1.2                                                                   | IPI00217465,IPI00217466,IPI00217467                                                                                                                                                                                                                                                 | 21,347.80  | 65 | 79 | ALAAAGYDVEKNNSR           | K | I | 1,578.79 |
| 259 | HIST1H1C Histone H1.2                                                                   | IPI00217465,IPI00217466,IPI00217467                                                                                                                                                                                                                                                 | 21,848.90  | 65 | 79 | ALAAAGYDVEKNNSR           | K | I | 1,578.79 |
| 260 | HIST1H1C Histone H1.2                                                                   | IPI00217465,IPI00217466,IPI00217467                                                                                                                                                                                                                                                 | 21,848.90  | 65 | 75 | ALAAAGYDVEK               | K | N | 1,107.57 |
| 261 | TUBB2C Tubulin beta-2C chain                                                            | IPI00007752                                                                                                                                                                                                                                                                         | 49,812.70  | 66 | 81 | VDLEPGTMDSVRSGPF          | L | G | 1,706.81 |
| 262 | TUBB Tubulin beta chain                                                                 | IPI00011654                                                                                                                                                                                                                                                                         | 49,652.60  | 66 | 81 | VDLEPGTMDSVRSGPF          | L | G | 1,706.81 |
| 263 | BAX Isoform Epsilon of Apoptosis regulator BAX                                          | IPI00071059,IPI00443773,IPI00444945,IPI00845474,IPI00885203                                                                                                                                                                                                                         | 18,111.40  | 66 | 78 | IGDELDSNMELQR             | R | M | 1,519.71 |
| 264 | PRDX4 Peroxiredoxin-4                                                                   | IPI00011937                                                                                                                                                                                                                                                                         | 30,523.10  | 67 | 78 | VSVADHSLHLSK              | R | A | 1,292.70 |
| 265 | CCT7 T-complex protein 1 subunit eta                                                    | IPI00018465                                                                                                                                                                                                                                                                         | 59,349.80  | 67 | 79 | KLLDVVHPPAAKTL            | L | V | 1,404.86 |
| 266 | ARF1 ADP-ribosylation factor 1                                                          | IPI00215914,IPI00215917                                                                                                                                                                                                                                                             | 20,679.60  | 67 | 77 | DVGGQDKIRPL               | W | W | 1,197.66 |
| 267 | GAPDH Glyceraldehyde-3-phosphate dehydrogenase                                          | IPI00219018,IPI00795257                                                                                                                                                                                                                                                             | 36,035.30  | 67 | 80 | LVINGNPITIFQER            | K | D | 1,613.90 |
| 268 | TPI1 Isoform 1 of Triosephosphate isomerase                                             | IPI00465028                                                                                                                                                                                                                                                                         | 30,772.80  | 67 | 85 | NAAKVPADTEVVCAPPTAY       | L | I | 1,973.96 |
| 269 | PABPC1 Isoform 1 of Polyadenylate-binding protein 1                                     | IPI00008524,IPI00410017                                                                                                                                                                                                                                                             | 70,653.30  | 68 | 78 | ALDTMNFVVIK               | R | G | 1,282.64 |
| 270 | SEC23A Protein transport protein Sec23A                                                 | IPI00017375                                                                                                                                                                                                                                                                         | 86,144.60  | 68 | 79 | AVLNPLCQVDYR              | R | A | 1,447.74 |
| 271 | NP cDNA FLJ25678 fis, clone TST04067, highly similar to PURINE NUCLEOSIDE PHOSPHORYLASE | IPI00017672,IPI00871140                                                                                                                                                                                                                                                             | 32,533.50  | 68 | 76 | LVFGFLNGR                 | R | A | 1,022.58 |
| 272 | HNRNPD Isoform 1 of Heterogeneous nuclear ribonucleoprotein D0                          | IPI00028888,IPI00220684                                                                                                                                                                                                                                                             | 38,416.50  | 68 | 85 | IDASKNEEDEGHNSNSPR        | K | H | 1,971.86 |
| 273 | NUP93 Nuclear pore complex protein Nup93                                                | IPI00397904                                                                                                                                                                                                                                                                         | 93,473.20  | 68 | 77 | GLDISHISQR                | R | L | 1,125.60 |



|     |                                                                                |                                                             |            |    |     |                                |   |   |          |
|-----|--------------------------------------------------------------------------------|-------------------------------------------------------------|------------|----|-----|--------------------------------|---|---|----------|
| 274 | DDX5 Probable ATP-dependent RNA helicase DDX5                                  | IPI00017617                                                 | 69,131.70  | 69 | 77  | TAQEVETYR                      | R | R | 1,096.53 |
| 275 | ACLY ATP-citrate synthase                                                      | IPI00021290,IPI00394838                                     | 120,824.80 | 69 | 82  | LGLVGVNLTLDGVK                 | K | S | 1,397.84 |
| 276 | EIF4A1 Eukaryotic initiation factor 4A-I                                       | IPI00025491,IPI00871852                                     | 46,137.30  | 69 | 82  | GVDVIAQAQSGTGK                 | K | T | 1,394.69 |
| 277 | FSCN1 Fascin                                                                   | IPI00163187,IPI00747810                                     | 54,512.30  | 69 | 82  | YLAADKDGNTTCER                 | R | E | 1,611.74 |
| 278 | CDC123 Cell division cycle protein 123 homolog                                 | IPI00005670,IPI00514175,IPI00514360                         | 35,847.50  | 70 | 81  | DAYWIAMNSSLK                   | R | C | 1,398.67 |
| 279 | PSMB2 Proteasome subunit beta type-2                                           | IPI00028006                                                 | 22,819.50  | 71 | 85  | NGYELSPTAAANFTR                | R | R | 1,611.78 |
| 280 | TP11 Isoform 1 of Triosephosphate isomerase                                    | IPI00465028                                                 | 30,772.80  | 71 | 90  | VPADTEVVCAPPTAYIDFAR           | K | Q | 2,192.07 |
| 281 | TP11 Isoform 1 of Triosephosphate isomerase                                    | IPI00465028                                                 | 30,772.80  | 71 | 90  | VPADTEVVCAPPTAYIDFAR           | K | Q | 2,192.07 |
| 282 | RPS5 40S ribosomal protein S5                                                  | IPI00008433                                                 | 22,859.00  | 72 | 81  | LTNSMMMMHGR                    | R | N | 1,177.53 |
| 283 | DHFR Dihydrofolate reductase                                                   | IPI00030357,IPI00887771                                     | 21,435.30  | 72 | 78  | INLVLSR                        | R | E | 814.5145 |
| 284 | AK2 Isoform 1 of Adenylate kinase isoenzyme 2, mitochondrial                   | IPI00215901,IPI00218988                                     | 26,461.00  | 73 | 85  | LVSDEMVELIEK                   | K | N | 1,503.80 |
| 285 | AK2 Isoform 1 of Adenylate kinase isoenzyme 2, mitochondrial                   | IPI00215901,IPI00218988                                     | 26,461.00  | 73 | 85  | LVSDEMVELIEK                   | K | N | 1,503.80 |
| 286 | HSP90AB1 Heat shock protein HSP 90-beta                                        | IPI00414676                                                 | 83,249.30  | 73 | 82  | IDIIPNPQER                     | K | T | 1,194.65 |
| 287 | LASP1 Isoform 1 of LIM and SH3 domain protein 1                                | IPI00000861,IPI00386803,IPI00883946,IPI00909481,IPI00909939 | 29,698.80  | 74 | 85  | LKQQSELQSQVR                   | R | Y | 1,443.79 |
| 288 | PPP2CA Serine/threonine-protein phosphatase 2A catalytic subunit alpha isoform | IPI00008380,IPI00815784                                     | 35,576.50  | 75 | 89  | SPDNTYLFMGDYVDR                | K | G | 1,792.78 |
| 289 | UCHL3 Ubiquitin carboxyl-terminal hydrolase isozyme L3                         | IPI00011250                                                 | 26,164.80  | 75 | 88  | SQGQDVTSSVYFMK                 | K | Q | 1,576.73 |
| 290 | UBE2S Ubiquitin-conjugating enzyme E2 S                                        | IPI00217949,IPI00878120                                     | 17,102.00  | 75 | 86  | LLLENYEEYAAR                   | R | A | 1,483.74 |
| 291 | EIF2B1 Translation initiation factor eIF-2B subunit alpha                      | IPI00221300                                                 | 33,695.20  | 75 | 88  | FISLASLEYSYDYSK                | R | C | 1,622.79 |
| 292 | SFRS3 Splicing factor, arginine/serine-rich 3                                  | IPI00010204,IPI00843996                                     | 19,312.00  | 76 | 86  | VRVELSNGEKR                    | R | S | 1,286.72 |
| 293 | CSE1L Isoform 1 of Exportin-2                                                  | IPI00022744,IPI00219994                                     | 110,403.90 | 76 | 89  | IVEDEPNKICEADR                 | R | V | 1,687.80 |
| 294 | ANP32A Acidic leucine-rich nuclear phosphoprotein 32 family member A           | IPI00025849,IPI00449263                                     | 28,568.10  | 76 | 86  | VSGGLEVLAEK                    | R | C | 1,101.62 |
| 295 | GSTP1 Glutathione S-transferase P                                              | IPI00219757                                                 | 23,338.70  | 76 | 101 | TLGLYGKDKQEAALVDMVND<br>GVEDLR | R | C | 2,849.40 |
| 296 | NONO Non-POU domain-containing octamer-binding protein                         | IPI00304596                                                 | 54,213.60  | 76 | 91  | LFVGNLPPDITEEEMR               | R | K | 1,859.92 |
| 297 | HSPA8 Isoform 1 of Heat shock cognate 71 kDa protein                           | IPI00003865                                                 | 70,881.80  | 77 | 88  | RFDDAVVQSDMK                   | R | H | 1,410.67 |
| 298 | RUVBL1 Isoform 1 of RuvB-like 1                                                | IPI00021187                                                 | 50,211.40  | 77 | 90  | TALALAIQELGSK                  | K | V | 1,385.80 |
| 299 | PPIA Peptidyl-prolyl cis-trans isomerase A                                     | IPI00419585,IPI00887678                                     | 17,994.90  | 77 | 91  | SIYGKFEDEFILK                  | K | H | 1,831.91 |
| 300 | TUBB2C Tubulin beta-2C chain                                                   | IPI00007752                                                 | 49,812.70  | 78 | 103 | SGPFGQIFRPDNFVFGQSGA<br>GNNWAK | R | G | 2,798.34 |
| 301 | TUBB Tubulin beta chain                                                        | IPI00011654                                                 | 49,652.60  | 78 | 103 | SGPFGQIFRPDNFVFGQSGA<br>GNNWAK | R | G | 2,798.34 |
| 302 | TUBB4 Tubulin beta-4 chain                                                     | IPI00023598                                                 | 49,567.40  | 78 | 103 | SGPFGQIFRPDNFVFGQSGA<br>GNNWAK | R | G | 2,798.34 |
| 303 | TUBB2B Tubulin beta-2B chain                                                   | IPI00031370                                                 | 49,935.10  | 78 | 103 | SGPFGQIFRPDNFVFGQSGA<br>GNNWAK | R | G | 2,798.34 |
| 304 | RPS8 40S ribosomal protein S8                                                  | IPI00216587,IPI00645201,IPI00872430                         | 24,188.40  | 78 | 92  | IIDVVYNASNNELVR                | R | T | 1,718.91 |
| 305 | LDHB L-lactate dehydrogenase B chain                                           | IPI00219217                                                 | 36,620.60  | 78 | 91  | IVADKDYSVTANSK                 | K | I | 1,510.77 |
| 306 | UHRF1 ubiquitin-like with PHD and ring finger domains 1 isoform 2              | IPI00797279,IPI00797945                                     | 91,082.30  | 78 | 87  | LNDTIQLLVR                     | R | Q | 1,184.70 |
| 307 | STIP1 Stress-induced-phosphoprotein 1                                          | IPI00013894,IPI00871856                                     | 62,624.10  | 79 | 87  | AAALEFLNR                      | K | F | 1,004.55 |
| 308 | PTGES3 Prostaglandin E synthase 3                                              | IPI00015029,IPI00789101,IPI00789698,IPI00790462,IPI00908647 | 18,679.90  | 79 | 88  | KGESGQSWPR                     | R | L | 1,131.55 |
| 309 | CDK6 Cell division protein kinase 6                                            | IPI00023529                                                 | 36,920.80  | 79 | 87  | LFDVCTVSR                      | R | T | 1,096.55 |
| 310 | FAR1 cDNA: FLJ22728 fis, clone HSI15617 (Fragment)                             | IPI00386139,IPI00478838                                     | 38,361.30  | 79 | 90  | IIAINSELTQPK                   | K | L | 1,326.76 |
| 311 | RAB18 Ras-related protein Rab-18                                               | IPI00014577                                                 | 22,959.50  | 80 | 92  | GAQGVLVYDVTR                   | R | R | 1,390.77 |
| 312 | NSDHL Sterol-4-alpha-carboxylate 3-dehydrogenase, decarboxylating              | IPI00019407,IPI00646262                                     | 41,882.80  | 80 | 88  | FFLGLDCSR                      | R | Q | 1,114.54 |
| 313 | PCNA Proliferating cell nuclear antigen                                        | IPI00021700                                                 | 28,751.30  | 80 | 90  | KCAGNEDIITL                    | L | R | 1,233.61 |
| 314 | SLC25A5 ADP/ATP translocase 2                                                  | IPI00007188                                                 | 32,878.50  | 81 | 92  | YFPTQALNFAFK                   | R | D | 1,446.74 |

|     |                                                                     |                                                                                                 |            |    |     |                                  |   |   |          |
|-----|---------------------------------------------------------------------|-------------------------------------------------------------------------------------------------|------------|----|-----|----------------------------------|---|---|----------|
| 315 | NPM1 Isoform 2 of Nucleophosmin                                     | IPI00220740,IPI00549248                                                                         | 29,446.90  | 81 | 101 | MSVQPTVSLGGFEITPPVVL R           | K | L | 2,243.21 |
| 316 | RPL24 60S ribosomal protein L24                                     | IPI00306332,IPI00791426,IPI00793696,IPI00873403                                                 | 17,761.50  | 81 | 93  | AITGASLADIMAK                    | R | R | 1,277.68 |
| 317 | ENO1 Isoform alpha-enolase of Alpha-enolase                         | IPI00465248                                                                                     | 47,152.20  | 81 | 92  | KLNVTEQEKIDK                     | K | L | 1,444.80 |
| 318 | TUBB2C Tubulin beta-2C chain                                        | IPI00007752                                                                                     | 49,812.70  | 82 | 92  | GQIFRPDNFVF                      | F | G | 1,339.68 |
| 319 | TUBB Tubulin beta chain                                             | IPI00011654                                                                                     | 49,652.60  | 82 | 92  | GQIFRPDNFVF                      | F | G | 1,339.68 |
| 320 | RAB11B Ras-related protein Rab-11B                                  | IPI00020436,IPI00429190,IPI00795676                                                             | 24,471.00  | 83 | 95  | GAVGALLVYDIAK                    | R | H | 1,289.75 |
| 321 | GSTP1 Glutathione S-transferase P                                   | IPI00219757                                                                                     | 23,338.70  | 83 | 101 | DQQE AALVDMVNDGVEDLR             | K | C | 2,116.98 |
| 322 | HSP90AB1 Heat shock protein HSP 90-beta                             | IPI00414676                                                                                     | 83,249.30  | 83 | 95  | TLTLVDTGIGMTK                    | R | A | 1,349.73 |
| 323 | HSP90AB1 Heat shock protein HSP 90-beta                             | IPI00414676                                                                                     | 83,249.30  | 83 | 95  | TLTLVDTGIGMTK                    | R | A | 1,349.73 |
| 324 | HSP90AB1 Heat shock protein HSP 90-beta                             | IPI00414676                                                                                     | 83,249.30  | 83 | 95  | TLTLVDTGIGMTK                    | R | A | 1,365.73 |
| 325 | CDC123 Cell division cycle protein 123 homolog                      | IPI00005670,IPI00514175,IPI00514360                                                             | 35,847.50  | 84 | 93  | TLSDIFLLFK                       | K | S | 1,196.69 |
| 326 | TOP2A Isoform 3 of DNA topoisomerase 2-alpha                        | IPI00218753,IPI00414101,IPI00478232,IPI00879004                                                 | 178,700.70 | 84 | 96  | IFDEILVNAADNK                    | K | Q | 1,461.76 |
| 327 | TOP2A Isoform 3 of DNA topoisomerase 2-alpha                        | IPI00218753,IPI00414101,IPI00478232,IPI00879004                                                 | 178,700.70 | 84 | 96  | IFDEILVNAADNK                    | K | Q | 1,461.76 |
| 328 | OLA1 Isoform 1 of Olg-like ATPase 1                                 | IPI00290416,IPI00916410,IPI00916847                                                             | 44,727.40  | 84 | 98  | IPAFNLVVDIAGLVK                  | K | G | 1,568.94 |
| 329 | HNRNPA2B1 43 kDa protein                                            | IPI00874030                                                                                     | 43,234.30  | 84 | 99  | LFIGGLSFETTEESLR                 | K | N | 1,798.92 |
| 330 | HNRNPA2B1 43 kDa protein                                            | IPI00874030                                                                                     | 43,234.30  | 84 | 99  | LFIGGLSFETTEESLR                 | K | N | 1,798.92 |
| 331 | HSPA4 Heat shock 70 kDa protein 4                                   | IPI00002966                                                                                     | 94,313.90  | 85 | 102 | SNLAYDIVQLPTGLTG I K             | K | V | 1,903.05 |
| 332 | CCT7 T-complex protein 1 subunit eta                                | IPI00018465                                                                                     | 59,349.80  | 85 | 106 | SQDAEVDGDTTSVTL LAAEFL K         | K | Q | 2,252.13 |
| 333 | TUBA1A Tubulin alpha-1A chain                                       | IPI00180675                                                                                     | 50,117.70  | 85 | 105 | QLFHPEQLITGKEDAANN YAR           | R | G | 2,415.21 |
| 334 | MTHFD1 C-1-tetrahydrofolate synthase, cytoplasmic                   | IPI00218342,IPI00794900                                                                         | 101,543.50 | 85 | 97  | ITSLNEDSTVHGF                    | Y | L | 1,419.68 |
| 335 | EEF1A1 Elongation factor 1-alpha 1                                  | IPI00396485                                                                                     | 50,123.20  | 85 | 96  | YYVTIADAPGHR                     | K | D | 1,404.73 |
| 336 | TUBB2C Tubulin beta-2C chain                                        | IPI00007752                                                                                     | 49,812.70  | 86 | 101 | RPDNFVFGQSGAGNNW                 | F | A | 1,765.80 |
| 337 | TUBB Tubulin beta chain                                             | IPI00011654                                                                                     | 49,652.60  | 86 | 101 | RPDNFVFGQSGAGNNW                 | F | A | 1,765.80 |
| 338 | RPL17;LOC100133931 60S ribosomal protein L17                        | IPI00413324,IPI00478208,IPI00514874,IPI00887088                                                 | 21,379.40  | 86 | 96  | KSAEFLHMLK                       | K | N | 1,316.74 |
| 339 | SF3B3 Isoform 1 of Splicing factor 3B subunit 3                     | IPI00300371                                                                                     | 135,561.40 | 87 | 96  | IVILEYQPSK                       | R | N | 1,189.68 |
| 340 | DIS3 Isoform 1 of Exosome complex exonuclease RRP44                 | IPI00746351                                                                                     | 108,987.70 | 87 | 99  | NVIVLQTVLQEV R                   | R | N | 1,510.90 |
| 341 | PDS5A Isoform 2 of Sister chromatid cohesion protein PDS5 homolog A | IPI00303063,IPI00854642                                                                         | 150,817.50 | 88 | 99  | LLVACCLADIFR                     | R | I | 1,450.75 |
| 342 | BAT3 Isoform 1 of Large proline-rich protein BAT3                   | IPI00465128,IPI00640922,IPI00641333,IPI00641784,IPI00642962,IPI00645431,IPI00894269,IPI00894467 | 119,389.30 | 88 | 118 | APPQTHLPSGASSGTGSASA THGGGSPPGTR | R | G | 2,785.33 |
| 343 | UBE2S Ubiquitin-conjugating enzyme E2 S                             | IPI00217949,IPI00878120                                                                         | 17,102.00  | 89 | 103 | LLTEIHGGAGGSPSGR                 | R | A | 1,421.75 |
| 344 | PC Pyruvate carboxylase, mitochondrial                              | IPI00299402                                                                                     | 129,616.70 | 89 | 104 | GLAPVQAYLHIPDI K                 | R | V | 1,748.01 |
| 345 | PPIA Peptidyl-prolyl cis-trans isomerase A                          | IPI00419585,IPI00887678                                                                         | 17,994.90  | 89 | 98  | ILKHTGPGIL                       | F | S | 1,048.65 |
| 346 | RARS Isoform Complexed of Arginyl-tRNA synthetase, cytoplasmic      | IPI00004860                                                                                     | 75,364.00  | 90 | 109 | AAYPDLENPPLLVTSPQQAK             | K | F | 2,152.13 |
| 347 | HIST1H2AH Histone H2A type 1-H                                      | IPI00081836,IPI00216457,IPI00220855,IPI00255316,IPI00291764,IPI00339274,IPI00552873,IPI00902514 | 13,888.80  | 90 | 100 | NDEELNKL LK                      | R | V | 1,272.68 |
| 348 | UBA1 Ubiquitin-like modifier-activating enzyme 1                    | IPI00645078                                                                                     | 117,832.30 | 90 | 97  | NIILGGVK                         | K | A | 813.5194 |
| 349 | RPS7 40S ribosomal protein S7                                       | IPI00013415                                                                                     | 22,109.50  | 91 | 98  | HVVFIAQR                         | K | R | 969.5628 |
| 350 | RUVBL1 Isoform 1 of RuvB-like 1                                     | IPI00021187                                                                                     | 50,211.40  | 91 | 107 | VPFCPMVGSEVYSTEIK                | K | K | 1,942.93 |
| 351 | ATIC Bifunctional purine biosynthesis protein PURH                  | IPI00289499                                                                                     | 64,598.50  | 91 | 97  | LDNFLIR                          | R | V | 890.5095 |
| 352 | YWHAQ 14-3-3 protein theta                                          | IPI00018146                                                                                     | 27,747.40  | 92 | 103 | SICTTVLELLDK                     | R | Y | 1,391.75 |
| 353 | YWHAZ 14-3-3 protein zeta/delta                                     | IPI00021263                                                                                     | 27,727.90  | 92 | 103 | DICNDVLSLLEK                     | R | F | 1,418.72 |
| 354 | DNM1L Isoform 5 of Dynamin-1-like protein                           | IPI00037283,IPI00146935,IPI00235412,IPI00473085,IPI00555883,IPI00871742                         | 85,362.60  | 92 | 101 | SSVLESLVGR                       | K | D | 1,046.58 |
| 355 | FSCN1 Fascin                                                        | IPI00163187,IPI00747810                                                                         | 54,512.30  | 92 | 101 | LIVAHDDGRW                       | F | S | 1,181.61 |
| 356 | PPIA Peptidyl-prolyl cis-trans isomerase A                          | IPI00419585,IPI00887678                                                                         | 17,994.90  | 92 | 118 | HTGPGILSMANAGPNTNGSQ FFICTAK     | K | T | 2,791.33 |
| 357 | TKT transketolase isoform 2                                         | IPI00792641                                                                                     | 58,965.00  | 92 | 103 | LDNLVAILDINR                     | K | L | 1,368.78 |
| 358 | PFAS Phosphoribosylformylglycinamide synthase                       | IPI00004534                                                                                     | 144,645.60 | 94 | 109 | LNFSTPTSTNIVSVCR                 | R | A | 1,795.90 |

|     |                                                                           |                                                                                                 |            |     |     |                         |   |   |          |
|-----|---------------------------------------------------------------------------|-------------------------------------------------------------------------------------------------|------------|-----|-----|-------------------------|---|---|----------|
| 359 | GDI2 cDNA FLJ60299, highly similar to Rab GDP dissociation inhibitor beta | IPI00031461                                                                                     | 51,138.50  | 94  | 102 | MLLYTEVTR               | K | Y | 1,125.60 |
| 360 | RPL9 60S ribosomal protein L9                                             | IPI00031691,IPI00795717                                                                         | 21,845.70  | 94  | 115 | SVYAHFPINNVVIQENGLSVEIR | R | N | 2,484.32 |
| 361 | AK2 Isoform 1 of Adenylate kinase isoenzyme 2, mitochondrial              | IPI00215901,IPI00218988                                                                         | 26,461.00  | 94  | 103 | NGFLLDGFPR              | K | T | 1,135.59 |
| 362 | PEBP1 Phosphatidylethanolamine-binding protein 1                          | IPI00219446                                                                                     | 21,038.90  | 94  | 113 | GNDISSGTVLSDYVGSPPK     | K | G | 1,949.95 |
| 363 | YWHAE 14-3-3 protein epsilon                                              | IPI00000816                                                                                     | 29,157.00  | 95  | 106 | LICCDILDVLDK            | K | H | 1,476.74 |
| 364 | PABPC1 Isoform 1 of Polyadenylate-binding protein 1                       | IPI00008524,IPI00410017                                                                         | 70,653.30  | 96  | 104 | SGVGNIFIK               | K | N | 934.5357 |
| 365 | ACTN1 Alpha-actinin-1                                                     | IPI00013508,IPI00759776,IPI00909239                                                             | 103,043.00 | 96  | 103 | ALDFIASK                | K | G | 864.4826 |
| 366 | SRM Spermidine synthase                                                   | IPI00292020                                                                                     | 33,806.50  | 96  | 109 | KVLIIGGGDGGVLR          | R | E | 1,353.82 |
| 367 | HSP90AB1 Heat shock protein HSP 90-beta                                   | IPI00414676                                                                                     | 83,249.30  | 96  | 107 | ADLINNLGTIAK            | K | S | 1,242.71 |
| 368 | HSP90AB1 Heat shock protein HSP 90-beta                                   | IPI00414676                                                                                     | 83,249.30  | 96  | 107 | ADLINNLGTIAK            | K | S | 1,242.71 |
| 369 | PSAT1 cDNA FLJ56437, highly similar to Phosphoserine aminotransferase     | IPI00001734,IPI00219478                                                                         | 45,338.10  | 97  | 106 | IINNTENLVR              | K | E | 1,185.66 |
| 370 | TPI1 Isoform 1 of Triosephosphate isomerase                               | IPI00465028                                                                                     | 30,772.80  | 97  | 106 | IAVAAQNCYK              | K | V | 1,137.57 |
| 371 | TPI1 Isoform 1 of Triosephosphate isomerase                               | IPI00465028                                                                                     | 30,772.80  | 97  | 106 | IAVAAQNCYK              | K | V | 1,137.57 |
| 372 | ATP1B3 Sodium/potassium-transporting ATPase subunit beta-3                | IPI00008167                                                                                     | 31,495.70  | 98  | 112 | SDPTS YAGYIEDLKK        | R | F | 1,686.82 |
| 373 | EIF5A Isoform 2 of Eukaryotic translation initiation factor 5A-1          | IPI00376005,IPI00411704,IPI00855924                                                             | 20,152.80  | 98  | 116 | KYEDICPSTHNMDVPNIKR     | K | N | 2,317.11 |
| 374 | HNRNPF Heterogeneous nuclear ribonucleoprotein F                          | IPI00003881                                                                                     | 45,653.80  | 99  | 114 | HSGPNSADSANDGFVR        | K | L | 1,630.72 |
| 375 | HNRNPH1 Heterogeneous nuclear ribonucleoprotein H                         | IPI00013881,IPI00479191                                                                         | 49,211.80  | 99  | 114 | HTGPNSPDTANDGFVR        | K | L | 1,684.77 |
| 376 | HNRNPH1 Heterogeneous nuclear ribonucleoprotein H                         | IPI00013881,IPI00479191                                                                         | 49,211.80  | 99  | 114 | HTGPNSPDTANDGFVR        | K | L | 1,684.77 |
| 377 | RAB18 Ras-related protein Rab-18                                          | IPI00014577                                                                                     | 22,959.50  | 99  | 112 | LDNWLNELEYCTR           | K | N | 1,826.84 |
| 378 | RPL18A 60S ribosomal protein L18a                                         | IPI00026202,IPI00847774,IPI00872093                                                             | 20,744.60  | 99  | 111 | DLTTAGAVTQCYR           | R | D | 1,455.69 |
| 379 | EEF2 Elongation factor 2                                                  | IPI00186290                                                                                     | 95,322.10  | 99  | 111 | LINLIDSPGHVDF           | F | S | 1,439.75 |
| 380 | RPS8 40S ribosomal protein S8                                             | IPI00216587,IPI00645201,IPI00872430                                                             | 24,188.40  | 99  | 110 | NCIVLIDSTPYR            | K | Q | 1,450.74 |
| 381 | RPL12 Isoform 1 of 60S ribosomal protein L12                              | IPI00024933                                                                                     | 17,801.10  | 100 | 114 | HSGNITFDEIVNIAR         | K | Q | 1,685.86 |
| 382 | ANP32A Acidic leucine-rich nuclear phosphoprotein 32 family member A      | IPI00025849,IPI00449263                                                                         | 28,568.10  | 100 | 110 | IKDLSTIEPLK             | K | K | 1,256.75 |
| 383 | ANP32E Acidic leucine-rich nuclear phosphoprotein 32 family member E      | IPI00165393,IPI00640833                                                                         | 30,675.30  | 100 | 113 | IKDLSTVEALQNLK          | K | N | 1,571.90 |
| 384 | PKM2 cDNA FLJ53368, highly similar to Pyruvate kinase isozymes M1/M2      | IPI00847989                                                                                     | 49,880.20  | 100 | 112 | IYVDDGLISLQVK           | K | Q | 1,462.82 |
| 385 | HIST1H2AH Histone H2A type 1-H                                            | IPI00081836,IPI00216457,IPI00220855,IPI00255316,IPI00291764,IPI00339274,IPI00552873,IPI00902514 | 13,888.80  | 101 | 119 | VTIAQGGVLPNIQAVLLPK     | K | K | 1,931.17 |
| 386 | HIST1H2AH Histone H2A type 1-H                                            | IPI00081836,IPI00216457,IPI00220855,IPI00255316,IPI00291764,IPI00339274,IPI00552873,IPI00902514 | 13,888.80  | 101 | 119 | VTIAQGGVLPNIQAVLLPK     | K | K | 1,931.17 |
| 387 | PCBP2 poly(rC) binding protein 2 isoform b                                | IPI00012066,IPI00470509,IPI00791223,IPI00796337                                                 | 38,204.50  | 102 | 115 | LVPASQCGSLIGK           | R | G | 1,428.79 |
| 388 | PCBP2 poly(rC) binding protein 2 isoform b                                | IPI00012066,IPI00470509,IPI00791223,IPI00796337                                                 | 38,204.50  | 102 | 115 | LVPASQCGSLIGK           | R | G | 1,428.79 |
| 389 | RFC5 Replication factor C subunit 5                                       | IPI00031514,IPI00373883,IPI00908568                                                             | 38,480.40  | 103 | 112 | GPILSFASTR              | R | T | 1,048.58 |
| 390 | HSPA1A;HSPA1B Heat shock 70 kDa protein 1                                 | IPI00304925                                                                                     | 70,036.00  | 103 | 112 | VQVSYKGETK              | K | A | 1,138.61 |
| 391 | TUBB2C Tubulin beta-2C chain                                              | IPI00007752                                                                                     | 49,812.70  | 104 | 122 | GHYTEGAELVDSVLDVVRK     | K | E | 2,087.08 |
| 392 | TUBB2C Tubulin beta-2C chain                                              | IPI00007752                                                                                     | 49,812.70  | 104 | 121 | GHYTEGAELVDSVLDVVR      | K | K | 1,958.98 |
| 393 | TUBB Tubulin beta chain                                                   | IPI00011654                                                                                     | 49,652.60  | 104 | 122 | GHYTEGAELVDSVLDVVRK     | K | E | 2,087.08 |
| 394 | TUBB Tubulin beta chain                                                   | IPI00011654                                                                                     | 49,652.60  | 104 | 121 | GHYTEGAELVDSVLDVVR      | K | K | 1,958.98 |
| 395 | OCIAD1 Isoform 1 of OCIA domain-containing protein 1                      | IPI00016405,IPI00816371,IPI00816523                                                             | 27,608.80  | 104 | 115 | KLENSPLGEALR            | K | S | 1,326.74 |
| 396 | PSMA7 Isoform 1 of Proteasome subunit alpha type-7                        | IPI00024175,IPI00154509,IPI00218372,IPI00219950,IPI00748423                                     | 28,512.20  | 104 | 117 | LTVEDPVTVEYITR          | K | F | 1,634.86 |
| 397 | TUBB2B Tubulin beta-2B chain                                              | IPI00031370                                                                                     | 49,935.10  | 104 | 122 | GHYTEGAELVDSVLDVVRK     | K | E | 2,087.08 |
| 398 | TUBB2B Tubulin beta-2B chain                                              | IPI00031370                                                                                     | 49,935.10  | 104 | 121 | GHYTEGAELVDSVLDVVR      | K | K | 1,958.98 |
| 399 | MCTS1 Isoform 1 of Malignant T cell amplified sequence 1                  | IPI00179026,IPI00645446,IPI00900380                                                             | 20,537.90  | 104 | 122 | FVLSGANIMCPGLTSPGAK     | K | L | 1,919.97 |

|     |                                                                           |                                     |            |     |     |                       |   |   |          |
|-----|---------------------------------------------------------------------------|-------------------------------------|------------|-----|-----|-----------------------|---|---|----------|
| 400 | ENO1 Isoform alpha-enolase of Alpha-enolase                               | IPI00465248                         | 47,152.20  | 106 | 120 | FGANAILGVSLAVCK       | K | A | 1,519.83 |
| 401 | NUDC Nuclear migration protein nudC                                       | IPI00550746,IPI00871312             | 38,225.70  | 106 | 114 | ELTDEEAER             | K | L | 1,091.49 |
| 402 | RAB7A Ras-related protein Rab-7a                                          | IPI00016342                         | 23,472.00  | 107 | 120 | LIQASPRDPENFFP        | F | V | 1,630.82 |
| 403 | PGK1 Phosphoglycerate kinase 1                                            | IPI00169383                         | 44,597.30  | 107 | 123 | ACANPAAGSVILLENLR     | K | F | 1,768.94 |
| 404 | CMPK1 cytidine monophosphate (UMP-CMP) kinase 1. cytosolic isoform a      | IPI00219953                         | 25,837.80  | 107 | 118 | EMDQTMAANAQK          | R | N | 1,337.58 |
| 405 | NUP93 Nuclear pore complex protein Nup93                                  | IPI00397904                         | 93,473.20  | 107 | 118 | DNALLSAIEESR          | K | K | 1,317.66 |
| 406 | TP11 Isoform 1 of Triosephosphate isomerase                               | IPI00465028                         | 30,772.80  | 107 | 122 | VTNGAFTGEISPGMIK      | K | D | 1,621.83 |
| 407 | TP11 Isoform 1 of Triosephosphate isomerase                               | IPI00465028                         | 30,772.80  | 107 | 122 | VTNGAFTGEISPGMIK      | K | D | 1,621.83 |
| 408 | PFKP 6-phosphofructokinase type C                                         | IPI00009790                         | 85,579.40  | 108 | 117 | LKAACNLLQR            | R | G | 1,186.67 |
| 409 | G3BP1 Ras GTPase-activating protein-binding protein 1                     | IPI00012442                         | 52,144.80  | 108 | 123 | FMQTFVLAPEGSVANK      | R | F | 1,738.88 |
| 410 | CDC42 Isoform 2 of Cell division control protein 42 homolog               | IPI00016786,IPI00909484             | 21,240.70  | 108 | 120 | TPFLLVGTQIDLR         | K | D | 1,472.85 |
| 411 | MCM6 DNA replication licensing factor MCM6                                | IPI00031517                         | 92,872.60  | 109 | 120 | DFYVAFQDLPTR          | K | H | 1,471.72 |
| 412 | DIS3 Isoform 1 of Exosome complex exonuclease RRP44                       | IPI00746351                         | 108,987.70 | 109 | 118 | IRDVTNNQEK            | R | H | 1,216.63 |
| 413 | PFKP 6-phosphofructokinase type C                                         | IPI00009790                         | 85,579.40  | 110 | 117 | AACNLLQR              | K | G | 945.4935 |
| 414 | ARF1 ADP-ribosylation factor 1                                            | IPI00215914,IPI00215917             | 20,679.60  | 110 | 127 | MLAEDELRDVLLVFANK     | R | Q | 2,047.09 |
| 415 | BTF3 Isoform 1 of Transcription factor BTF3                               | IPI00221035,IPI00419473             | 22,150.30  | 110 | 118 | TNQGTVIHF             | F | N | 1,016.52 |
| 416 | PRDX1 Peroxiredoxin-1                                                     | IPI00000874,IPI00640741             | 22,092.90  | 111 | 128 | TIAQDYGVLKADEGISFR    | R | G | 1,983.02 |
| 417 | PREP Prolyl endopeptidase                                                 | IPI00008164                         | 80,683.50  | 112 | 128 | VFLDPNLSDDGTVALR      | R | G | 1,844.98 |
| 418 | CCT7 T-complex protein 1 subunit eta                                      | IPI00018465                         | 59,349.80  | 112 | 125 | VEEGLHPQIIIRAF        | Y | R | 1,621.91 |
| 419 | TIMM23 Mitochondrial import inner membrane translocase subunit Tim23      | IPI00007309                         | 21,926.20  | 113 | 122 | NVQILNMVTR            | R | Q | 1,187.66 |
| 420 | DRG1 Developmentally-regulated GTP-binding protein 1                      | IPI00031836,IPI00877819             | 40,525.80  | 113 | 126 | IQLLDLPGIIEGAK        | K | D | 1,479.88 |
| 421 | PABPC1 Isoform 1 of Polyadenylate-binding protein 1                       | IPI00008524,IPI00410017             | 70,653.30  | 114 | 129 | ALYDTFSAFGNILSCK      | K | V | 1,806.87 |
| 422 | RAB7A Ras-related protein Rab-7a                                          | IPI00016342                         | 23,472.00  | 114 | 126 | DPENFFPVVLGNK         | R | I | 1,475.75 |
| 423 | ACTN4 Alpha-actinin-4                                                     | IPI00013808                         | 104,839.20 | 115 | 122 | ALDFIASK              | K | G | 864.4826 |
| 424 | IARS Isoleucyl-tRNA synthetase, cytoplasmic                               | IPI00644127,IPI00877938             | 144,944.40 | 115 | 125 | MGITEYNNQCR           | K | A | 1,385.59 |
| 425 | TSN Translin                                                              | IPI00018768,IPI00917623             | 26,165.40  | 117 | 131 | EAVTEILGIEPDREK       | R | G | 1,698.89 |
| 426 | ANP32A Acidic leucine-rich nuclear phosphoprotein 32 family member A      | IPI00025849,IPI00449263             | 28,568.10  | 117 | 132 | SLDLFNCEVTNLNDYR      | K | E | 1,972.91 |
| 427 | HN1L Isoform 1 of Hematological and neurological expressed 1-like protein | IPI00027397,IPI00607884,IPI00909195 | 20,045.60  | 117 | 127 | LCEGEEPKSDL           | F | K | 1,276.57 |
| 428 | AARS Alanyl-tRNA synthetase, cytoplasmic                                  | IPI00027442,IPI00910701             | 106,795.20 | 117 | 132 | MALELLTQEFGIPIER      | K | L | 1,859.99 |
| 429 | ZNF326 Isoform 1 of Zinc finger protein 326                               | IPI00373877,IPI00872597             | 65,635.50  | 117 | 125 | NSLDSFGGR             | R | N | 952.4483 |
| 430 | ENO1 Isoform alpha-enolase of Alpha-enolase                               | IPI00465248                         | 47,152.20  | 117 | 130 | AVCKAGAVEKGVPL        | L | Y | 1,398.78 |
| 431 | PFKP 6-phosphofructokinase type C                                         | IPI00009790                         | 85,579.40  | 118 | 138 | GITNLCVIGGDGSLTGANLFR | R | K | 2,135.09 |
| 432 | RPL23A;hCG_16001 60S ribosomal protein L23a                               | IPI00021266                         | 17,678.20  | 118 | 127 | DIDVAKVNTL            | Y | I | 1,087.60 |
| 433 | GRB2 Isoform 1 of Growth factor receptor-bound protein 2                  | IPI00021327,IPI00792746             | 25,188.80  | 118 | 124 | YFLWVVK               | K | F | 954.5447 |
| 434 | GNB2L1 38 kDa protein                                                     | IPI00641950,IPI00848226             | 37,740.10  | 118 | 128 | LWDLTTGTTR            | R | R | 1,264.65 |
| 435 | PAFAH1B3 Platelet-activating factor acetylhydrolase IB subunit gamma      | IPI00014808                         | 25,715.60  | 119 | 127 | AIVQLVNER             | K | Q | 1,041.61 |
| 436 | ST13 Hsc70-interacting protein                                            | IPI00032826                         | 41,314.40  | 119 | 132 | VAAIEALNDGELQK        | K | A | 1,470.78 |
| 437 | BTF3 Isoform 1 of Transcription factor BTF3                               | IPI00221035,IPI00419473             | 22,150.30  | 119 | 132 | NNPKVQASLAANTF        | F | T | 1,474.76 |
| 438 | NCAPD2 Condensin complex subunit 1                                        | IPI00299524                         | 157,155.30 | 119 | 126 | MNCYALIR              | K | L | 1,040.50 |
| 439 | SURF4 Isoform 1 of Surfeit locus protein 4                                | IPI00005737,IPI00399142,IPI00641719 | 30,377.40  | 120 | 135 | NLALGGGLLLLLAESR      | R | S | 1,609.96 |
| 440 | NONO Non-POU domain-containing octamer-binding protein                    | IPI00304596                         | 54,213.60  | 120 | 135 | TLAEIAKVELDNMPLR      | R | G | 1,812.99 |
| 441 | PRDX1 Peroxiredoxin-1                                                     | IPI00000874,IPI00640741             | 22,092.90  | 121 | 128 | ADEGISFR              | K | G | 894.4316 |
| 442 | NOP5/NOP58 Nucleolar protein 5                                            | IPI00006379                         | 59,562.20  | 121 | 133 | SQMDGLIPGVEPR         | R | E | 1,398.70 |
| 443 | ATP6V1A V-type proton ATPase catalytic subunit A                          | IPI00007682                         | 68,287.40  | 121 | 129 | GVNVSALS              | R | D | 902.5053 |

|     |                                                                           |                                                 |            |     |     |                                          |   |          |
|-----|---------------------------------------------------------------------------|-------------------------------------------------|------------|-----|-----|------------------------------------------|---|----------|
| 444 | RPS7 40S ribosomal protein S7                                             | IPI00013415                                     | 22,109.50  | 121 | 143 | TLTAVHDAILEDLVFPSEIVGK R                 | I | 2,523.38 |
| 445 | RPS7 40S ribosomal protein S7                                             | IPI00013415                                     | 22,109.50  | 121 | 142 | TLTAVHDAILEDLVFPSEIVGK R                 | R | 2,367.28 |
| 446 | GSTP1 Glutathione S-transferase P                                         | IPI00219757                                     | 23,338.70  | 122 | 141 | ALPGQLKPFETLLSQNQGGK K                   | T | 2,126.16 |
| 447 | TUBB2C Tubulin beta-2C chain                                              | IPI00007752                                     | 49,812.70  | 123 | 154 | EAESCDCLQGFQLTHSLGGG K                   | I | 3,311.53 |
| 448 | TUBB Tubulin beta chain                                                   | IPI00011654                                     | 49,652.60  | 123 | 154 | TGSGMGTLTLLISK<br>EAESCDCLQGFQLTHSLGGG K | I | 3,311.53 |
| 449 | TUBB4 Tubulin beta-4 chain                                                | IPI00023598                                     | 49,567.40  | 123 | 154 | TGSGMGTLTLLISK<br>EAESCDCLQGFQLTHSLGGG K | I | 3,311.53 |
| 450 | GDI2 cDNA FLJ60299, highly similar to Rab GDP dissociation inhibitor beta | IPI00031461                                     | 51,138.50  | 123 | 141 | TGSGMGTLTLLISK<br>VPSTEAEALASSLMGLFEK K  | R | 1,980.00 |
| 451 | MCTS1 Isoform 1 of Malignant T cell amplified sequence 1                  | IPI00179026,IPI00645446,IPI00900380             | 20,537.90  | 123 | 139 | LYPAAVDTVAIMAEGK K                       | Q | 1,761.95 |
| 452 | PTBP1 polypyrimidine tract-binding protein 1 isoform a                    | IPI00183626,IPI00334175                         | 59,616.40  | 123 | 134 | GQPIYIQFSNHK R                           | E | 1,431.74 |
| 453 | BTF3 Isoform 1 of Transcription factor BTF3                               | IPI00221035,IPI00419473                         | 22,150.30  | 123 | 141 | VQASLAANTFTITGHAETK K                    | Q | 1,960.01 |
| 454 | TP11 Isoform 1 of Triosephosphate isomerase                               | IPI00465028                                     | 30,772.80  | 123 | 136 | DCGATWVVLGHSER K                         | R | 1,586.74 |
| 455 | TP11 Isoform 1 of Triosephosphate isomerase                               | IPI00465028                                     | 30,772.80  | 123 | 136 | DCGATWVVLGHSER K                         | R | 1,586.74 |
| 456 | STIP1 Stress-induced-phosphoprotein 1                                     | IPI00013894,IPI00871856                         | 62,624.10  | 124 | 136 | FMNPFNMPNLYQK K                          | L | 1,643.77 |
| 457 | IRS4 Insulin receptor substrate 4                                         | IPI00020729                                     | 133,751.30 | 124 | 146 | AAAAAAAAAASGAAIPLIPPR R                  | V | 2,055.18 |
| 458 | TCEA1 Isoform 1 of Transcription elongation factor A protein 1            | IPI00333215                                     | 33,952.60  | 124 | 132 | DTYVSSFPR R                              | A | 1,071.51 |
| 459 | GNL3 Isoform 2 of Guanine nucleotide-binding protein-like 3               | IPI00003886,IPI00306380,IPI00896526             | 60,527.60  | 125 | 139 | VIEASDVVLEVLDR K                         | D | 1,627.89 |
| 460 | PCBP2 poly(rC) binding protein 2 isoform b                                | IPI00012066,IPI00470509,IPI00791223,IPI00796337 | 38,204.50  | 125 | 144 | ESTGAQVQVAGDMLPNSTER R                   | A | 2,089.98 |
| 461 | PCBP2 poly(rC) binding protein 2 isoform b                                | IPI00012066,IPI00470509,IPI00791223,IPI00796337 | 38,204.50  | 125 | 144 | ESTGAQVQVAGDMLPNSTER R                   | A | 2,089.98 |
| 462 | PCBP1 Poly(rC)-binding protein 1                                          | IPI00016610                                     | 37,480.20  | 125 | 144 | ESTGAQVQVAGDMLPNSTER R                   | A | 2,089.98 |
| 463 | TUBA4B Putative tubulin-like protein alpha-4B                             | IPI00017454                                     | 27,533.90  | 125 | 141 | NSILTHTTLEHSDCAF Y                       | M | 1,946.89 |
| 464 | GRB2 Isoform 1 of Growth factor receptor-bound protein 2                  | IPI00021327,IPI00792746                         | 25,188.80  | 125 | 136 | FNSLNELVDYHR K                           | S | 1,506.73 |
| 465 | PC Pyruvate carboxylase, mitochondrial                                    | IPI00299402                                     | 129,616.70 | 125 | 137 | ADFAQACQDAGVR R                          | F | 1,408.63 |
| 466 | ACTN4 Alpha-actinin-4                                                     | IPI00013808                                     | 104,839.20 | 126 | 140 | LVSIGAEIIVDGNK K                         | M | 1,514.81 |
| 467 | CUGBP1 Isoform 1 of CUG-BP- and ETR-3-like factor 1                       | IPI00034015,IPI00218388,IPI00218389,IPI00853009 | 52,046.00  | 126 | 138 | VMFSSFGQIEECR R                          | I | 1,589.71 |
| 468 | MDH1 Malate dehydrogenase, cytoplasmic                                    | IPI00291005,IPI00915869                         | 36,408.90  | 126 | 142 | VIVVGNPANTNCLTASK K                      | S | 1,757.92 |
| 469 | HSPA8 Isoform 1 of Heat shock cognate 71 kDa protein                      | IPI00003865                                     | 70,881.80  | 127 | 137 | MKEIAEAYLGK K                            | T | 1,252.66 |
| 470 | NAT13 Isoform 1 of N-acetyltransferase 13                                 | IPI00018627                                     | 19,380.90  | 127 | 135 | FGFEIETK K                               | K | 1,083.57 |
| 471 | NAT13 Isoform 1 of N-acetyltransferase 13                                 | IPI00018627                                     | 19,380.90  | 127 | 136 | FGFEIETKK K                              | N | 1,211.67 |
| 472 | BUB3 budding uninhibited by benzimidazoles 3 isoform b                    | IPI00514701                                     | 36,936.50  | 127 | 139 | TPCNAGTFSQPEK R                          | V | 1,436.65 |
| 473 | BUB3 budding uninhibited by benzimidazoles 3 isoform b                    | IPI00514701                                     | 36,936.50  | 127 | 139 | TPCNAGTFSQPEK R                          | V | 1,436.65 |
| 474 | YWHAQ 14-3-3 protein theta                                                | IPI00018146                                     | 27,747.40  | 128 | 138 | YLAEVACGDDR R                            | K | 1,268.56 |
| 475 | YWHAQ 14-3-3 protein theta                                                | IPI00018146                                     | 27,747.40  | 128 | 139 | YLAEVACGDDRK R                           | Q | 1,396.65 |
| 476 | YWHAZ 14-3-3 protein zeta/delta                                           | IPI00021263                                     | 27,727.90  | 128 | 139 | YLAEVAAGDDKK R                           | G | 1,279.65 |
| 477 | RPL7 60S ribosomal protein L7                                             | IPI00030179,IPI00472171,IPI00871827,IPI00872387 | 29,209.70  | 128 | 134 | ASINMLR K                                | I | 804.4396 |
| 478 | PRDX1 Peroxiredoxin-1                                                     | IPI00000874,IPI00640741                         | 22,092.90  | 129 | 136 | GLFIIDDK R                               | G | 920.509  |
| 479 | STAG2 stromal antigen 2 isoform a                                         | IPI00470883,IPI00552978,IPI00872562,IPI00902944 | 145,738.60 | 129 | 137 | GVVTAEMFR K                              | H | 1,009.51 |
| 480 | PFKM Isoform 2 of 6-phosphofructokinase, muscle type                      | IPI00219585,IPI00465179,IPI00743142             | 81,758.50  | 130 | 141 | SEWSDLLSDLQK R                           | A | 1,420.70 |
| 481 | SNRNP200 Isoform 1 of U5 small nuclear ribonucleoprotein 200 kDa helicase | IPI00420014                                     | 244,495.80 | 130 | 144 | DILCGAADEVLAFLK R                        | N | 1,586.85 |
| 482 | COPG2 Coatomer subunit gamma-2                                            | IPI00002557                                     | 97,606.50  | 131 | 142 | ITDGTMLQAIE R                            | Y | 1,347.69 |

|     |                                                                                                           |                                                             |            |     |     |                        |   |   |          |
|-----|-----------------------------------------------------------------------------------------------------------|-------------------------------------------------------------|------------|-----|-----|------------------------|---|---|----------|
| 483 | RPL12 Isoform 1 of 60S ribosomal protein L12                                                              | IPI00024933                                                 | 17,801.10  | 131 | 146 | EILGTAQSVGCNV DGR      | K | H | 1,675.81 |
| 484 | HNRNPA1 Isoform A1-B of Heterogeneous nuclear ribonucleoprotein A1                                        | IPI00215965,IPI00465365                                     | 38,828.10  | 131 | 140 | IEVIEIMTDR             | K | G | 1,218.64 |
| 485 | SFRS6 Isoform SRP55-1 of Splicing factor, arginine/serine-rich 6                                          | IPI00012345,IPI00215879,IPI00556297                         | 39,570.40  | 132 | 145 | QAGEVTYADAHKER         | R | T | 1,574.76 |
| 486 | TCP1 T-complex protein 1 subunit alpha                                                                    | IPI00290566                                                 | 60,327.20  | 132 | 148 | INENLIVNTDELGRDCL      | Y | I | 1,987.98 |
| 487 | PPIA Peptidyl-prolyl cis-trans isomerase A                                                                | IPI00419585,IPI00887678                                     | 17,994.90  | 132 | 144 | VKEGMNIVEAMER          | K | F | 1,505.75 |
| 488 | CCT5 T-complex protein 1 subunit epsilon                                                                  | IPI00010720,IPI00910316                                     | 59,654.30  | 133 | 142 | IADGYEQAAR             | R | V | 1,093.53 |
| 489 | PAFAH1B3 Platelet-activating factor acetylhydrolase IB subunit gamma                                      | IPI00014808                                                 | 25,715.60  | 133 | 141 | VVVLGLLPR              | R | G | 965.6507 |
| 490 | DDX17 DEAD box polypeptide 17 isoform 1                                                                   | IPI00023785,IPI00651653                                     | 80,256.00  | 133 | 143 | NFYVEHPEVAR            | K | L | 1,360.66 |
| 491 | PPIA Peptidyl-prolyl cis-trans isomerase A                                                                | IPI00419585,IPI00887678                                     | 17,994.90  | 134 | 144 | EGMNIVEAMER            | K | F | 1,278.58 |
| 492 | PTRH2 Peptidyl-tRNA hydrolase 2, mitochondrial                                                            | IPI00032903,IPI00555597                                     | 19,175.70  | 135 | 148 | MLGLTVSLIQDAGR         | K | T | 1,473.81 |
| 493 | EEF1A1 Elongation factor 1-alpha 1                                                                        | IPI00396485                                                 | 50,123.20  | 135 | 146 | EHALLAYTLGVK           | R | Q | 1,314.74 |
| 494 | TPT1 Tumor protein, translationally-controlled 1                                                          | IPI00009943,IPI00550900,IPI00908553                         | 21,508.50  | 136 | 149 | IGENMNP DGMVALL        | F | D | 1,473.71 |
| 495 | ARL2BP Isoform 1 of ADP-ribosylation factor-like protein 2-binding protein                                | IPI00015866,IPI00845377                                     | 18,805.20  | 136 | 150 | GLDLSSGLVVTSLCK        | R | S | 1,548.83 |
| 496 | GNPNAT1 Glucosamine 6-phosphate N-acetyltransferase                                                       | IPI00061525                                                 | 20,731.30  | 136 | 146 | LLLSTLTLLSK            | K | K | 1,201.78 |
| 497 | PLS3 plastin 3                                                                                            | IPI00216694                                                 | 70,795.90  | 136 | 144 | ALENDPDCR              | K | H | 1,089.46 |
| 498 | UBE2S Ubiquitin-conjugating enzyme E2 S                                                                   | IPI00217949,IPI00878120                                     | 23,828.40  | 136 | 147 | LLLENYEEYAAR           | R | A | 1,483.74 |
| 499 | GNB2L1 38 kDa protein                                                                                     | IPI00641950,IPI00848226                                     | 37,740.10  | 136 | 147 | DVLSVAFSSDNR           | K | Q | 1,309.64 |
| 500 | TPI1 Isoform 1 of Triosephosphate isomerase                                                               | IPI00465028                                                 | 30,772.80  | 138 | 150 | HVFGESDELIGQK          | R | V | 1,458.72 |
| 501 | RPS10 40S ribosomal protein S10                                                                           | IPI00008438,IPI00749512                                     | 18,880.30  | 139 | 153 | KAEAGAGSATEFQFR        | K | G | 1,569.77 |
| 502 | CCT3 chaperonin containing TCP1, subunit 3 isoform b                                                      | IPI00290770,IPI00553185                                     | 60,446.30  | 139 | 162 | ISIPVDISDSMMLNIINSSITT | K | A | 2,607.33 |
| 503 | PFKP 6-phosphofructokinase type C                                                                         | IPI00009790                                                 | 85,579.40  | 140 | 150 | EWSQLLEELAR            | K | N | 1,302.67 |
| 504 | YWHAZ 14-3-3 protein zeta/delta                                                                           | IPI00021263                                                 | 27,727.90  | 140 | 157 | GIVDQSQQAYQEAFEISK     | K | K | 2,040.99 |
| 505 | RPL23A;hCG_16001 60S ribosomal protein L23a                                                               | IPI00021266                                                 | 17,678.20  | 140 | 152 | LAPDYDALDVANK          | R | I | 1,404.70 |
| 506 | HNRNPK Isoform 1 of Heterogeneous nuclear ribonucleoprotein K                                             | IPI00216049,IPI00216746,IPI00514561,IPI00807545,IPI00910458 | 50,960.50  | 140 | 148 | GSDFDCELR              | K | L | 1,098.45 |
| 507 | UFD1L Isoform Short of Ubiquitin fusion degradation protein 1 homolog                                     | IPI00218292,IPI00654779,IPI00655754,IPI00873326             | 34,483.20  | 140 | 147 | AVLENALR               | K | N | 885.5152 |
| 508 | BUB3 budding uninhibited by benzimidazoles 3 isoform b                                                    | IPI00514701                                                 | 36,936.50  | 140 | 149 | VYTLVSVSGDR            | K | L | 1,096.56 |
| 509 | HNRNPU cDNA FLJ44920 fis, clone BRAMY3011501, highly similar to Heterogeneous nuclear ribonucleoprotein U | IPI00640106,IPI00644079                                     | 83,067.80  | 140 | 163 | KAEGGGGGGRPGAPAAGDG    | K | G | 2,153.07 |
| 510 | PRDX1 Peroxiredoxin-1                                                                                     | IPI00000874,IPI00640741                                     | 22,092.90  | 141 | 151 | QITVNDLPVGR            | R | S | 1,211.67 |
| 511 | NAT13 Isoform 1 of N-acetyltransferase 13                                                                 | IPI00018627                                                 | 19,380.90  | 141 | 152 | RIEPADAHVLQK           | K | N | 1,376.76 |
| 512 | YWHAE 14-3-3 protein epsilon                                                                              | IPI00000816                                                 | 29,157.00  | 142 | 153 | KEAAENSLVAYK           | R | A | 1,322.70 |
| 513 | SLC25A6 ADP/ATP translocase 3                                                                             | IPI00291467                                                 | 32,849.10  | 142 | 154 | AADVKGSGTEREF          | L | R | 1,366.66 |
| 514 | NONO Non-POU domain-containing octamer-binding protein                                                    | IPI00304596                                                 | 54,213.60  | 143 | 153 | FACHSASLTVR            | R | N | 1,248.62 |
| 515 | HSP90AA1 heat shock protein 90kDa alpha (cytosolic), class A member 1 isoform 1                           | IPI00382470,IPI00784295                                     | 98,147.10  | 143 | 151 | AFQAEIAQL              | F | M | 990.5255 |
| 516 | SMC3 Structural maintenance of chromosomes protein 3                                                      | IPI00219420                                                 | 141,529.10 | 144 | 155 | INQMATAPDSQR           | K | L | 1,331.64 |
| 517 | PCNA Proliferating cell nuclear antigen                                                                   | IPI00021700                                                 | 28,751.30  | 145 | 169 | ARICRDLSHIGDAVVISCAKDG | F | S | 2,787.44 |
| 518 | CLTC Isoform 1 of Clathrin heavy chain 1                                                                  | IPI00024067,IPI00455383                                     | 191,600.90 | 145 | 157 | VKF<br>HSSLAGCQIINYR   | R | T | 1,518.75 |
| 519 | RPS5 40S ribosomal protein S5                                                                             | IPI00008433                                                 | 22,859.00  | 146 | 159 | RVNQAIWLLCTGAR         | R | E | 1,657.90 |
| 520 | TFRC Transferrin receptor protein 1                                                                       | IPI00022462                                                 | 84,855.60  | 146 | 155 | LLNENSYVPR             | K | E | 1,204.63 |
| 521 | EIF4EBP3;ANKHD1-EIF4EBP3 ANKHD1-EIF4EBP3 protein                                                          | IPI00217442,IPI00797397,IPI00798060,IPI00867587             | 277,154.80 | 146 | 157 | LEALLEAAGIGK           | R | L | 1,184.69 |
| 522 | GAPDH Glyceraldehyde-3-phosphate dehydrogenase                                                            | IPI00219018,IPI00795257                                     | 36,035.30  | 146 | 162 | IISNASCTTNCLAPLAK      | K | V | 1,833.92 |
| 523 | ILF2 Interleukin enhancer-binding factor 2                                                                | IPI00005198                                                 | 43,044.70  | 147 | 155 | RAQDPSEVL              | L | T | 1,014.52 |

|     |                                                                           |                                                 |            |     |     |                                             |   |   |          |
|-----|---------------------------------------------------------------------------|-------------------------------------------------|------------|-----|-----|---------------------------------------------|---|---|----------|
| 524 | RPS5 40S ribosomal protein S5                                             | IPI00008433                                     | 22,859.00  | 147 | 159 | VNQAIWLLCTGAR                               | R | E | 1,501.79 |
| 525 | RAB7A Ras-related protein Rab-7a                                          | IPI00016342                                     | 23,472.00  | 147 | 157 | NNIPYFETSAK                                 | K | E | 1,283.63 |
| 526 | HN1L Isoform 1 of Hematological and neurological expressed 1-like protein | IPI00027397,IPI00607884,IPI00909195             | 20,045.60  | 147 | 166 | KAGPAKEQEPMPVDSHEPR                         | R | L | 2,204.08 |
| 527 | PTBP1 polypyrimidine tract-binding protein 1 isoform a                    | IPI00183626,IPI00334175                         | 59,616.40  | 147 | 185 | AQAALQAVNSVQSGNLALAA<br>SAAAVDAGMAMAGQSPVLR | R | I | 3,680.88 |
| 528 | ILF2 Interleukin enhancer-binding factor 2                                | IPI00005198                                     | 43,044.70  | 148 | 174 | AQDPSEVLTLMLNETGFEISS<br>SDATVK             | R | I | 2,870.36 |
| 529 | RPL14 Ribosomal protein L14 variant                                       | IPI00555744                                     | 23,769.70  | 148 | 165 | GTAAAAAAAAAAAAAAAAAK                        | K | V | 1,370.74 |
| 530 | PTRH2 Peptidyl-tRNA hydrolase 2, mitochondrial                            | IPI00032903,IPI00555597                         | 19,175.70  | 149 | 177 | TQIAPGSQTVLIGIGPGPADLID<br>KVTGHLK          | R | L | 2,883.59 |
| 531 | CUGBP1 Isoform 1 of CUG-BP- and ETR-3-like factor 1                       | IPI00034015,IPI00218388,IPI00218389,IPI00853009 | 52,046.00  | 149 | 158 | GCAFVTFTR                                   | R | A | 1,159.56 |
| 532 | RRBP1 Isoform 3 of Ribosome-binding protein 1                             | IPI00215743,IPI00220967,IPI00744135,IPI00856098 | 165,696.10 | 149 | 166 | VEPAVSSVVNSIQVLTSK                          | K | A | 1,857.03 |
| 533 | RAP1B Ras-related protein Rap-1b                                          | IPI00015148,IPI00908754,IPI00910592             | 20,806.90  | 150 | 163 | SKINVNEIFYDLVR                              | K | Q | 1,709.92 |
| 534 | CDC2 Putative uncharacterized protein DKFZp686L2022                       | IPI00026689                                     | 34,762.10  | 150 | 157 | LADFLGAR                                    | K | A | 862.4782 |
| 535 | UBE2S Ubiquitin-conjugating enzyme E2 S                                   | IPI00217949,IPI00878120                         | 23,828.40  | 150 | 164 | LLTEIHGGAGGPGSGR                            | R | A | 1,421.75 |
| 536 | QPRT Nicotinate-nucleotide pyrophosphorylase [carboxylatinal]             | IPI00300086,IPI00853023,IPI00872692             | 30,797.30  | 150 | 161 | YGLLVGGAASHR                                | K | Y | 1,200.65 |
| 537 | JUP Junction plakoglobin                                                  | IPI00554711                                     | 81,727.90  | 150 | 161 | LLNDEDPVVVTK                                | K | A | 1,341.73 |
| 538 | UHRF1 ubiquitin-like with PHD and ring finger domains 1 isoform 2         | IPI00797279,IPI00797945                         | 91,082.30  | 150 | 157 | VNEYVDAR                                    | K | D | 965.4686 |
| 539 | HNRNPF Heterogeneous nuclear ribonucleoprotein F                          | IPI00003881                                     | 45,653.80  | 151 | 167 | ITGEAFVQFASQEIAEK                           | K | A | 1,867.94 |
| 540 | HNRNPH1 Heterogeneous nuclear ribonucleoprotein H                         | IPI00013881,IPI00479191                         | 49,211.80  | 151 | 167 | STGEAFVQFASQEIAEK                           | R | A | 1,841.89 |
| 541 | HNRNPH1 Heterogeneous nuclear ribonucleoprotein H                         | IPI00013881,IPI00479191                         | 49,211.80  | 151 | 167 | STGEAFVQFASQEIAEK                           | R | A | 1,841.89 |
| 542 | GDI2 cDNA FLJ60299, highly similar to Rab GDP dissociation inhibitor beta | IPI00031461                                     | 51,138.50  | 151 | 162 | VANFDEKDPRTF                                | Y | E | 1,438.70 |
| 543 | TPI1 Isoform 1 of Triosephosphate isomerase                               | IPI00465028                                     | 30,772.80  | 151 | 172 | VAHALAEGLGVIACIGEKLDE<br>R                  | K | E | 2,321.23 |
| 544 | TPI1 Isoform 1 of Triosephosphate isomerase                               | IPI00465028                                     | 30,772.80  | 151 | 168 | VAHALAEGLGVIACIGEK                          | K | L | 1,807.97 |
| 545 | TPI1 Isoform 1 of Triosephosphate isomerase                               | IPI00465028                                     | 30,772.80  | 151 | 168 | VAHALAEGLGVIACIGEK                          | K | L | 1,807.97 |
| 546 | RCC1 regulator of chromosome condensation 1 isoform a                     | IPI00001661,IPI00747309,IPI00787306             | 48,126.30  | 152 | 170 | VVQVSAGDSHTAALDDGR                          | K | V | 1,898.92 |
| 547 | TUBB2C Tubulin beta-2C chain                                              | IPI00007752                                     | 49,812.70  | 152 | 167 | ISKIREEYPDRIMNTF                            | L | S | 2,012.03 |
| 548 | TUBB Tubulin beta chain                                                   | IPI00011654                                     | 49,652.60  | 152 | 167 | ISKIREEYPDRIMNTF                            | L | S | 2,012.03 |
| 549 | RAP1B Ras-related protein Rap-1b                                          | IPI00015148,IPI00908754,IPI00910592             | 20,806.90  | 152 | 163 | INVNEIFYDLVR                                | K | Q | 1,494.80 |
| 550 | BTF3 Isoform 1 of Transcription factor BTF3                               | IPI00221035,IPI00419473                         | 22,150.30  | 152 | 162 | NQLGADSLTSL                                 | L | R | 1,118.57 |
| 551 | HNRNPA3 Isoform 1 of Heterogeneous nuclear ribonucleoprotein A3           | IPI00419373                                     | 39,577.10  | 152 | 161 | IETIEVMEDR                                  | K | Q | 1,234.60 |
| 552 | HNRNPA3 Isoform 1 of Heterogeneous nuclear ribonucleoprotein A3           | IPI00419373                                     | 39,577.10  | 152 | 161 | IETIEVMEDR                                  | K | Q | 1,234.60 |
| 553 | ACACA Isoform 1 of Acetyl-CoA carboxylase 1                               | IPI00011569                                     | 265,538.40 | 153 | 163 | FVVMVTPEDLK                                 | R | A | 1,277.68 |
| 554 | ACACA Isoform 1 of Acetyl-CoA carboxylase 1                               | IPI00011569                                     | 265,538.40 | 153 | 163 | FVVMVTPEDLK                                 | R | A | 1,277.68 |
| 555 | NAT13 Isoform 1 of N-acetyltransferase 13                                 | IPI00018627                                     | 19,380.90  | 153 | 169 | NLKVPSGQNADVQKTDN                           | K | - | 1,827.92 |
| 556 | YWHAE 14-3-3 protein epsilon                                              | IPI00000816                                     | 29,157.00  | 154 | 170 | AASDIAMTELPPTHPIR                           | K | L | 1,819.94 |
| 557 | RAB1B Ras-related protein Rab-1B                                          | IPI00008964,IPI00871366                         | 22,154.00  | 154 | 170 | NATNVEQAFMTMAAEIK                           | K | K | 1,868.89 |
| 558 | STIP1 Stress-induced-phosphoprotein 1                                     | IPI00013894,IPI00871856                         | 62,624.10  | 154 | 160 | ELIEQLR                                     | R | N | 900.515  |
| 559 | RAB18 Ras-related protein Rab-18                                          | IPI00014577                                     | 22,959.50  | 154 | 168 | TCDGVQCAFEELVEK                             | K | I | 1,784.78 |
| 560 | CDC42 Isoform 2 of Cell division control protein 42 homolog               | IPI00016786,IPI00909484                         | 21,240.70  | 154 | 163 | YVECSALTQK                                  | K | G | 1,198.58 |
| 561 | COPB1 Coatomer subunit beta                                               | IPI00295851                                     | 107,128.00 | 154 | 164 | NAVLAITYIYR                                 | R | N | 1,296.73 |
| 562 | ALDOA Fructose-bisphosphate aldolase A                                    | IPI00465439,IPI00796333                         | 39,402.60  | 154 | 173 | IGEHTPSALAIMENANVLAR                        | K | Y | 2,107.10 |
| 563 | CDC42 Isoform 2 of Cell division control protein 42 homolog               | IPI00016786,IPI00909484                         | 21,240.70  | 155 | 165 | VECSALTQKGL                                 | Y | K | 1,205.62 |

|     |                                                                   |                                                             |            |     |     |                                |   |   |          |
|-----|-------------------------------------------------------------------|-------------------------------------------------------------|------------|-----|-----|--------------------------------|---|---|----------|
| 564 | AK1 Adenylate kinase isoenzyme 1                                  | IPI00018342,IPI00640817                                     | 21,617.10  | 155 | 164 | KATEPVIAFY                     | Y | E | 1,138.61 |
| 565 | NAT13 Isoform 1 of N-acetyltransferase 13                         | IPI00018627                                                 | 19,380.90  | 155 | 169 | KVPSGQNADVQKTDN                | L | - | 1,600.79 |
| 566 | HSPH1 Isoform Beta of Heat shock protein 105 kDa                  | IPI00218993,IPI00513743,IPI00514983,IPI00910755             | 92,099.00  | 155 | 169 | SVLDAAQIVGLNCLR                | R | L | 1,628.88 |
| 567 | EEF1A1 Elongation factor 1-alpha 1                                | IPI00396485                                                 | 50,123.20  | 155 | 165 | MDSTPEPPYSQK                   | K | R | 1,282.56 |
| 568 | PPIA Peptidyl-prolyl cis-trans isomerase A                        | IPI00419585,IPI00887678                                     | 17,994.90  | 155 | 165 | KITIADCGQLE                    | K | - | 1,247.63 |
| 569 | HSD17B12 Estradiol 17-beta-dehydrogenase 12                       | IPI00007676                                                 | 34,307.40  | 157 | 167 | MININILSVCK                    | K | M | 1,304.71 |
| 570 | CKB Creatine kinase B-type                                        | IPI00022977,IPI00908811                                     | 42,627.10  | 157 | 172 | LAVEALSSLDGDLAGR               | K | Y | 1,586.84 |
| 571 | PTPN1 Tyrosine-protein phosphatase non-receptor type 1            | IPI00297261                                                 | 49,949.70  | 157 | 169 | QLELENLTTQETR                  | R | E | 1,574.80 |
| 572 | PARK7 Protein DJ-1                                                | IPI00298547                                                 | 19,873.10  | 157 | 182 | GPGTSFEFALAIVEALNGKEV<br>AAQVK | R | A | 2,646.41 |
| 573 | RAB7A Ras-related protein Rab-7a                                  | IPI00016342                                                 | 23,472.00  | 158 | 171 | EAINVEQAFQTIAR                 | K | N | 1,589.83 |
| 574 | PLS3 plastin 3                                                    | IPI00216694                                                 | 70,795.90  | 158 | 166 | KAVGDGIVL                      | F | C | 871.5249 |
| 575 | YWHAQ 14-3-3 protein theta                                        | IPI00018146                                                 | 27,747.40  | 159 | 167 | EMQPTHPIR                      | K | L | 1,108.56 |
| 576 | YWHAZ 14-3-3 protein zeta/delta                                   | IPI00021263                                                 | 27,727.90  | 159 | 167 | EMQPTHPIR                      | K | L | 1,108.56 |
| 577 | PLS3 plastin 3                                                    | IPI00216694                                                 | 70,795.90  | 159 | 168 | AVGDGIVLCK                     | K | M | 1,031.56 |
| 578 | LDHB L-lactate dehydrogenase B chain                              | IPI00219217                                                 | 36,620.60  | 159 | 170 | VIGSGCNLDSAR                   | R | F | 1,248.60 |
| 579 | PEBP1 Phosphatidylethanolamine-binding protein 1                  | IPI00219446                                                 | 21,038.90  | 159 | 169 | ELRAPVAGTCY                    | Y | Q | 1,236.60 |
| 580 | NUDC Nuclear migration protein nudC                               | IPI00550746,IPI00871312                                     | 38,225.70  | 159 | 173 | LKPNLNGADLPNYR                 | K | W | 1,641.87 |
| 581 | HNRNPF Heterogeneous nuclear ribonucleoprotein F                  | IPI00003881                                                 | 45,653.80  | 160 | 169 | ASQELAEKAL                     | F | G | 1,059.57 |
| 582 | HNRNPH1 Heterogeneous nuclear ribonucleoprotein H                 | IPI00013881,IPI00479191                                     | 49,211.80  | 160 | 169 | ASQEIAEKAL                     | F | K | 1,059.57 |
| 583 | FAM62A Isoform 1 of Extended synaptotagmin-1                      | IPI00022143,IPI00746655,IPI00902463                         | 122,841.10 | 160 | 170 | LLAETVAPAVR                    | K | G | 1,139.68 |
| 584 | DRG1 Developmentally-regulated GTP-binding protein 1              | IPI00031836,IPI00877819                                     | 40,525.80  | 160 | 171 | IIENELEGFGIR                   | K | L | 1,389.74 |
| 585 | HSPA1A;HSPA1B Heat shock 70 kDa protein 1                         | IPI00304925                                                 | 70,036.00  | 160 | 171 | DAGVIAGLNVLR                   | K | I | 1,197.70 |
| 586 | HSPA1A;HSPA1B Heat shock 70 kDa protein 1                         | IPI00304925                                                 | 70,036.00  | 160 | 171 | DAGVIAGLNVLR                   | K | I | 1,197.70 |
| 587 | PSMD10 26S proteasome non-ATPase regulatory subunit 10            | IPI00003565,IPI00027699,IPI00552190                         | 24,410.20  | 161 | 176 | YKASTNIQDTEGNTPL               | Y | H | 1,751.84 |
| 588 | ADD1 Isoform 1 of Alpha-adducin                                   | IPI00019901,IPI00220158,IPI00253279,IPI00376220,IPI00794741 | 45,931.60  | 161 | 178 | TLASAGGPDNLVLLNPEK             | R | Y | 1,808.98 |
| 589 | CDK6 Cell division protein kinase 6                               | IPI00023529                                                 | 36,920.80  | 161 | 168 | LADFLGAR                       | K | I | 862.4782 |
| 590 | YWHAB Isoform Long of 14-3-3 protein beta/alpha                   | IPI00216318,IPI00759832                                     | 28,065.10  | 161 | 169 | EMQPTHPIR                      | K | L | 1,108.56 |
| 591 | COPA Isoform 1 of Coatamer subunit alpha                          | IPI00295857,IPI00646493                                     | 138,331.30 | 161 | 168 | VWDISGLR                       | R | K | 945.5153 |
| 592 | PSMD10 26S proteasome non-ATPase regulatory subunit 10            | IPI00003565,IPI00027699,IPI00552190                         | 24,410.20  | 162 | 176 | KASTNIQDTEGNTPL                | Y | H | 1,588.78 |
| 593 | TUBB2C Tubulin beta-2C chain                                      | IPI00007752                                                 | 49,812.70  | 163 | 174 | IMNTFSVVPSPK                   | R | V | 1,335.70 |
| 594 | TUBB Tubulin beta chain                                           | IPI00011654                                                 | 49,652.60  | 163 | 174 | IMNTFSVVPSPK                   | R | V | 1,319.70 |
| 595 | TUBB Tubulin beta chain                                           | IPI00011654                                                 | 49,652.60  | 163 | 174 | IMNTFSVVPSPK                   | R | V | 1,319.70 |
| 596 | TUBB Tubulin beta chain                                           | IPI00011654                                                 | 49,652.60  | 163 | 174 | IMNTFSVVPSPK                   | R | V | 1,335.70 |
| 597 | TUBB4 Tubulin beta-4 chain                                        | IPI00023598                                                 | 49,567.40  | 163 | 174 | IMNTFSVVPSPK                   | R | V | 1,335.70 |
| 598 | TUBB2B Tubulin beta-2B chain                                      | IPI00031370                                                 | 49,935.10  | 163 | 174 | IMNTFSVMPSPK                   | R | V | 1,351.67 |
| 599 | IPO4 Isoform 1 of Importin-4                                      | IPI00156374,IPI00398009                                     | 118,700.70 | 163 | 182 | LLNETLGEVGSPPGLLFYSLR          | R | T | 2,178.18 |
| 600 | EEF2 Elongation factor 2                                          | IPI00186290                                                 | 95,322.10  | 163 | 180 | ALLELQLEPEELYQTFQR             | R | I | 2,220.15 |
| 601 | ENO1 Isoform alpha-enolase of Alpha-enolase                       | IPI00465248                                                 | 47,152.20  | 163 | 179 | LAMQEFMILPVGAAANFR             | K | E | 1,923.98 |
| 602 | ACACA Isoform 1 of Acetyl-CoA carboxylase 1                       | IPI00011569                                                 | 265,538.40 | 164 | 170 | ANAAYIK                        | K | M | 808.4199 |
| 603 | EEF1B2 Elongation factor 1-beta                                   | IPI00178440                                                 | 24,746.20  | 164 | 176 | SIQADGLVWGSSK                  | R | L | 1,347.69 |
| 604 | CDC42 Isoform 2 of Cell division control protein 42 homolog       | IPI00016786,IPI00909484                                     | 21,240.70  | 166 | 174 | KNVFDEAIL                      | L | A | 1,048.57 |
| 605 | PSMD1 Isoform 1 of 26S proteasome non-ATPase regulatory subunit 1 | IPI00299608,IPI00456695                                     | 105,821.20 | 166 | 182 | TILESDNVPGLMAYSLK              | K | L | 1,850.96 |
| 606 | CDC42 Isoform 2 of Cell division control protein 42 homolog       | IPI00016786,IPI00909484                                     | 21,240.70  | 167 | 183 | NVFDEAILAALPEPEPK              | K | K | 1,852.97 |



|     |                                                                                                                                         |                                                             |            |     |     |                            |   |   |          |
|-----|-----------------------------------------------------------------------------------------------------------------------------------------|-------------------------------------------------------------|------------|-----|-----|----------------------------|---|---|----------|
| 607 | CDC2 Putative uncharacterized protein<br>DKFZp686L20222                                                                                 | IPI00026689                                                 | 34,762.10  | 167 | 174 | THEVVTWLW                  | Y | Y | 984.5149 |
| 608 | RPL7 60S ribosomal protein L7                                                                                                           | IPI00030179,IPI00472171,IPI00871827,IPI00872387             | 29,209.70  | 167 | 177 | IALTDNALIAR                | R | S | 1,170.68 |
| 609 | CCT3 chaperonin containing TCP1, subunit 3<br>isoform b                                                                                 | IPI00290770,IPI00553185                                     | 60,446.30  | 167 | 180 | WSSLACNIALDAVK             | R | M | 1,547.79 |
| 610 | EEF1A1 Elongation factor 1-alpha 1                                                                                                      | IPI00396485                                                 | 50,123.20  | 167 | 172 | YEEIVK                     | R | E | 780.4138 |
| 611 | RPS5 40S ribosomal protein S5                                                                                                           | IPI00008433                                                 | 22,859.00  | 168 | 182 | TIAECLADELINA AK           | K | G | 1,631.83 |
| 612 | NAPA Alpha-soluble NSF attachment protein                                                                                               | IPI00009253                                                 | 33,216.10  | 168 | 180 | VAGYAAALLEQYQK             | K | A | 1,453.77 |
| 613 | NUDT4;NUDT4P1 Isoform 2 of Diphosphoinositol<br>polyphosphate phosphohydrolase 2                                                        | IPI00021408,IPI00396090,IPI00607685                         | 20,416.00  | 168 | 181 | VTAAQTSGLPSSVR             | F | - | 1,373.74 |
| 614 | RNASEH2A Ribonuclease H2 subunit A                                                                                                      | IPI00290192                                                 | 33,377.00  | 168 | 183 | ADALYPVVSAA S ICAK         | K | V | 1,635.84 |
| 615 | HSPA1A;HSPA1B Heat shock 70 kDa protein 1                                                                                               | IPI00304925                                                 | 70,036.00  | 168 | 183 | NVLR IINEPTAAAIAY          | L | G | 1,728.96 |
| 616 | RAB18 Ras-related protein Rab-18                                                                                                        | IPI00014577                                                 | 22,959.50  | 169 | 183 | IIQTPGLWESENQNK            | K | G | 1,756.89 |
| 617 | PCNA Proliferating cell nuclear antigen                                                                                                 | IPI00021700                                                 | 28,751.30  | 169 | 181 | FSASGELGNGNIK              | K | L | 1,293.64 |
| 618 | HSP90AA1 heat shock protein 90kDa alpha<br>(cytosolic), class A member 1 isoform 1                                                      | IPI00382470,IPI00784295                                     | 98,147.10  | 169 | 182 | ELISNSSDALDKIR             | R | Y | 1,560.82 |
| 619 | ENO1 Isoform alpha-enolase of Alpha-enolase                                                                                             | IPI00465248                                                 | 47,152.20  | 169 | 178 | MILPVGAAANF                | F | R | 1,032.55 |
| 620 | ISYNA1 cDNA FLJ34860 fis, clone NT2NE2012790,<br>highly similar to Homo sapiens myo-inositol 1-<br>phosphate synthase A1 (ISYNA1), mRNA | IPI00478861,IPI00549569,IPI00640098,IPI00644161,IPI00645069 | 55,118.10  | 169 | 179 | VIVLWTANTER                | K | F | 1,301.72 |
| 621 | GNB2L1 38 kDa protein                                                                                                                   | IPI00641950,IPI00848226                                     | 37,740.10  | 169 | 184 | YTVQDESHSEWVSCVR           | K | F | 1,981.87 |
| 622 | CACYBP Isoform 1 of Calcyclin-binding protein                                                                                           | IPI00395627,IPI00552308                                     | 23,144.80  | 170 | 181 | KIYEDGDDDMKR               | K | T | 1,484.67 |
| 623 | PSMB2 Proteasome subunit beta type-2                                                                                                    | IPI00028006                                                 | 22,819.50  | 171 | 181 | FILNLPTFSVR                | R | I | 1,306.75 |
| 624 | RPS8 40S ribosomal protein S8                                                                                                           | IPI00216587,IPI00645201,IPI00872430                         | 24,188.40  | 171 | 184 | LLACIASRPGQCGR             | K | A | 1,558.79 |
| 625 | CACYBP Isoform 1 of Calcyclin-binding protein                                                                                           | IPI00395627,IPI00552308                                     | 23,144.80  | 171 | 181 | IYEDGDDDMKR                | K | T | 1,356.57 |
| 626 | HSPA8 Isoform 1 of Heat shock cognate 71 kDa<br>protein                                                                                 | IPI00003865                                                 | 70,881.80  | 172 | 187 | IINEPTAAAIAYGLDK           | R | K | 1,659.90 |
| 627 | HSPA8 Isoform 1 of Heat shock cognate 71 kDa<br>protein                                                                                 | IPI00003865                                                 | 70,881.80  | 172 | 188 | IINEPTAAAIAYGLDKK          | R | V | 1,787.99 |
| 628 | HNRNPA0 Heterogeneous nuclear<br>ribonucleoprotein A0                                                                                   | IPI00011913                                                 | 30,822.50  | 172 | 189 | KAVPKEDIYSGGGGGGSR         | K | S | 1,734.88 |
| 629 | DDX5 Probable ATP-dependent RNA helicase<br>DDX5                                                                                        | IPI00017617                                                 | 69,131.70  | 172 | 190 | VLAPTRELAQQVQQVAEY         | L | C | 2,114.12 |
| 630 | RUVBL1 Isoform 1 of RuvB-like 1                                                                                                         | IPI00021187                                                 | 50,211.40  | 172 | 182 | LDPSIFESLQK                | K | E | 1,276.68 |
| 631 | HSPA1A;HSPA1B Heat shock 70 kDa protein 1                                                                                               | IPI00304925                                                 | 70,036.00  | 172 | 187 | IINEPTAAAIAYGLDR           | R | T | 1,687.90 |
| 632 | RAB1B Ras-related protein Rab-1B                                                                                                        | IPI00008964,IPI00871366                                     | 22,154.00  | 173 | 187 | MGPGAASGGGERPNLK           | R | I | 1,441.72 |
| 633 | HNRNPA0 Heterogeneous nuclear<br>ribonucleoprotein A0                                                                                   | IPI00011913                                                 | 30,822.50  | 173 | 189 | AVPKEDIYSGGGGGGSR          | K | S | 1,606.78 |
| 634 | USO1 Putative uncharacterized protein<br>DKFZp451D234                                                                                   | IPI00031583                                                 | 109,171.10 | 175 | 183 | LMDLLADSR                  | R | E | 1,033.53 |
| 635 | RPL9 60S ribosomal protein L9                                                                                                           | IPI00031691,IPI00795717                                     | 21,845.70  | 175 | 184 | FLDGIYVSEK                 | K | G | 1,170.60 |
| 636 | KIF20B Isoform 1 of M-phase phosphoprotein 1                                                                                            | IPI00044751,IPI00412862,IPI00827503                         | 210,671.10 | 175 | 186 | TLNVLFDSLQER               | R | L | 1,434.76 |
| 637 | EIF4EBP3;ANKHD1-EIF4EBP3 ANKHD1-<br>EIF4EBP3 protein                                                                                    | IPI00217442,IPI00797397,IPI00798060,IPI00867587             | 277,154.80 | 175 | 192 | LTSSVSCALDEAAAAALTR        | R | M | 1,835.92 |
| 638 | UBA1 Ubiquitin-like modifier-activating enzyme 1                                                                                        | IPI00645078                                                 | 117,832.30 | 175 | 182 | VGEFCHNR                   | R | G | 1,018.45 |
| 639 | KHDRBS1 Isoform 1 of KH domain-containing, RNA-<br>binding, signal transduction-associated protein 1                                    | IPI00008575,IPI00385834,IPI00479209                         | 48,210.20  | 176 | 186 | ILGPQGN TIKR               | K | L | 1,196.71 |
| 640 | CDC2 Putative uncharacterized protein<br>DKFZp686L20222                                                                                 | IPI00026689                                                 | 34,762.10  | 177 | 186 | SPEVLLGSAR                 | R | Y | 1,028.57 |
| 641 | ATP1B3 Sodium/potassium-transporting ATPase<br>subunit beta-3                                                                           | IPI00008167                                                 | 31,495.70  | 178 | 188 | IIGLKPEGVPR                | R | I | 1,178.73 |
| 642 | PCBP1 Poly(rC)-binding protein 1                                                                                                        | IPI00016610                                                 | 37,480.20  | 178 | 200 | VMTIPYQMPASSPVICAGGQ<br>DR | R | C | 2,475.18 |
| 643 | DDX5 Probable ATP-dependent RNA helicase<br>DDX5                                                                                        | IPI00017617                                                 | 69,131.70  | 178 | 192 | ELAQQVQQVAEYCR             | R | A | 1,792.86 |
| 644 | TMCO1 Isoform 1 of Transmembrane and coiled-<br>coil domain-containing protein 1                                                        | IPI00026111,IPI00761107                                     | 21,158.30  | 178 | 188 | LGPPPPSGKFS                | F | - | 1,083.58 |

|     |                                                                                                           |                                                                         |            |     |     |                         |   |   |          |
|-----|-----------------------------------------------------------------------------------------------------------|-------------------------------------------------------------------------|------------|-----|-----|-------------------------|---|---|----------|
| 645 | TOP2A Isoform 3 of DNA topoisomerase 2-alpha                                                              | IPI00218753,IPI00414101,IPI00478232,IPI00879004                         | 178,700.70 | 178 | 186 | TVETASREY               | F | K | 1,055.50 |
| 646 | JUP Junction plakoglobin                                                                                  | IPI00554711                                                             | 81,727.90  | 178 | 191 | ALMGSPQLVAAVVR          | R | T | 1,411.81 |
| 647 | SLC1A5 Neutral amino acid transporter B(0)                                                                | IPI00019472                                                             | 56,581.80  | 179 | 189 | EVLDSFLDLAR             | K | N | 1,277.67 |
| 648 | BAT1 Isoform 2 of Spliceosome RNA helicase BAT1                                                           | IPI00641829,IPI00792043,IPI00848161,IPI00893580                         | 50,662.10  | 179 | 190 | NCPHIVVGTGPR            | K | I | 1,306.67 |
| 649 | GDI2 cDNA FLJ60299, highly similar to Rab GDP dissociation inhibitor beta                                 | IPI00031461                                                             | 51,138.50  | 180 | 193 | DLGQDVIDFTGHAL          | F | A | 1,500.73 |
| 650 | HNRNPK Isoform 1 of Heterogeneous nuclear ribonucleoprotein K                                             | IPI00216049,IPI00216746,IPI00514561,IPI00807545,IPI00910458             | 50,960.50  | 180 | 191 | LFQECCPHSTDR            | K | V | 1,549.65 |
| 651 | POLD1 DNA polymerase delta catalytic subunit                                                              | IPI00002894,IPI00556021,IPI00655631                                     | 123,615.50 | 181 | 195 | ELTGPAVLAVELCSR         | R | E | 1,614.85 |
| 652 | NAPA Alpha-soluble NSF attachment protein                                                                 | IPI00009253                                                             | 33,216.10  | 181 | 199 | AIDIYEQVGTNAMDSPLLK     | K | Y | 2,078.05 |
| 653 | RPS7 40S ribosomal protein S7                                                                             | IPI00013415                                                             | 22,109.50  | 181 | 194 | TGKDVNFEPFQQL           | L | - | 1,670.81 |
| 654 | RPL9 60S ribosomal protein L9                                                                             | IPI00031691,IPI00795717                                                 | 21,845.70  | 181 | 192 | VSEKGTVQQADE            | Y | - | 1,290.62 |
| 655 | APEH Acylamino-acid-releasing enzyme                                                                      | IPI00337741                                                             | 81,206.00  | 181 | 193 | ALDVSASDDEIAR           | K | L | 1,361.65 |
| 656 | HSP90AB1 Heat shock protein HSP 90-beta                                                                   | IPI00414676                                                             | 83,249.30  | 181 | 196 | VILHLKEDQTEYLEER        | K | R | 2,015.04 |
| 657 | HNRNPU cDNA FLJ44920 fis, clone BRAMY3011501, highly similar to Heterogeneous nuclear ribonucleoprotein U | IPI00640106,IPI00644079                                                 | 83,067.80  | 181 | 193 | GYFEYIEENKYSR           | R | A | 1,697.78 |
| 658 | MAT2A S-adenosylmethionine synthetase isoform type-2                                                      | IPI00010157                                                             | 43,642.80  | 182 | 192 | TQVTVQYMQDR             | K | G | 1,368.66 |
| 659 | PSMB2 Proteasome subunit beta type-2                                                                      | IPI00028006                                                             | 22,819.50  | 182 | 198 | IIDKNGIHDLDNISFPK       | R | Q | 1,939.03 |
| 660 | CCT2 T-complex protein 1 subunit beta                                                                     | IPI00297779                                                             | 57,471.90  | 182 | 189 | LAVEAVLR                | K | L | 870.5407 |
| 661 | ILF3 Isoform 5 of Interleukin enhancer-binding factor 3                                                   | IPI00219330,IPI00298788,IPI00298789,IPI00414335,IPI00418313,IPI00556173 | 74,589.90  | 183 | 200 | VLAGETLSVNDPPDVLDR      | K | Q | 1,909.99 |
| 662 | HSP90AA1 heat shock protein 90kDa alpha (cytosolic), class A member 1 isoform 1                           | IPI00382470,IPI00784295                                                 | 98,147.10  | 183 | 196 | YESLTDPSKLDSGK          | R | E | 1,539.75 |
| 663 | RPS7 40S ribosomal protein S7                                                                             | IPI00013415                                                             | 22,109.50  | 184 | 194 | DVNFEFPEFQL             | K | - | 1,384.64 |
| 664 | ACTG1 Actin, cytoplasmic 2                                                                                | IPI00021440                                                             | 41,775.90  | 184 | 191 | DLTDYLMK                | R | I | 998.4865 |
| 665 | HNRNPD Isoform 1 of Heterogeneous nuclear ribonucleoprotein D0                                            | IPI00028888,IPI00220684                                                 | 38,416.50  | 184 | 197 | IFVGGLSPTDPEEK          | K | I | 1,488.76 |
| 666 | IPO7 Importin-7                                                                                           | IPI00007402                                                             | 119,501.50 | 185 | 201 | FIQLLSDQSDQSVLIQK       | R | Q | 1,962.05 |
| 667 | GNB2L1 38 kDa protein                                                                                     | IPI00641950,IPI00848226                                                 | 37,740.10  | 185 | 201 | FSPNSSNPIIVSCGWDK       | R | L | 1,907.90 |
| 668 | ACTN1 Alpha-actinin-1                                                                                     | IPI00013508,IPI00759776,IPI00909239                                     | 103,043.00 | 186 | 195 | HRPELIDYGK              | R | L | 1,227.65 |
| 669 | AK2 Isoform 1 of Adenylate kinase isoenzyme 2, mitochondrial                                              | IPI00215901,IPI00218988                                                 | 26,461.00  | 187 | 202 | LQAYHTQTTPLEIYYR        | R | K | 1,997.01 |
| 670 | TP11 Isoform 1 of Triosephosphate isomerase                                                               | IPI00465028                                                             | 30,772.80  | 187 | 197 | VIADNVKDWSK             | K | V | 1,274.67 |
| 671 | CORO1C cDNA FLJ50992, highly similar to Coronin 1C                                                        | IPI00798401,IPI00867509                                                 | 49,361.90  | 187 | 202 | AIFLADGNVFTTGFSR        | R | M | 1,715.88 |
| 672 | TUBB2C Tubulin beta-2C chain                                                                              | IPI00007752                                                             | 49,812.70  | 188 | 200 | SVHQLVENTDETY           | L | C | 1,534.70 |
| 673 | TUBB Tubulin beta chain                                                                                   | IPI00011654                                                             | 49,652.60  | 188 | 200 | SVHQLVENTDETY           | L | C | 1,534.70 |
| 674 | USO1 Putative uncharacterized protein DKFZp451D234                                                        | IPI00031583                                                             | 109,171.10 | 188 | 199 | NDGVLLLQALTR            | R | S | 1,312.76 |
| 675 | SLC25A5 ADP/ATP translocase 2                                                                             | IPI00007188                                                             | 32,878.50  | 189 | 199 | AAYFGIYDTAK             | R | G | 1,219.60 |
| 676 | LAP3 Isoform 1 of Cytosol aminopeptidase                                                                  | IPI00419237,IPI00789806                                                 | 56,149.70  | 189 | 200 | GVLFASGQNLAR            | K | Q | 1,232.67 |
| 677 | IGF2BP1 Insulin-like growth factor 2 mRNA-binding protein 1                                               | IPI00008557                                                             | 63,438.30  | 191 | 199 | QQQVDIPLR               | K | L | 1,096.61 |
| 678 | NCL cDNA FLJ45706 fis, clone FEBRA2028457, highly similar to Nucleolin                                    | IPI00444262,IPI00604620,IPI00827674                                     | 65,945.80  | 191 | 211 | VEGTEPTTAFNLFVGNLNFNK   | K | S | 2,312.16 |
| 679 | KPNB1 Importin subunit beta-1                                                                             | IPI00001639                                                             | 97,153.30  | 192 | 206 | LAATNALLNSLEFTK         | K | A | 1,605.88 |
| 680 | KPNB1 Importin subunit beta-1                                                                             | IPI00001639                                                             | 97,153.30  | 192 | 206 | LAATNALLNSLEFTK         | K | A | 1,605.88 |
| 681 | GSTP1 Glutathione S-transferase P                                                                         | IPI00219757                                                             | 23,338.70  | 192 | 210 | AFLASPEYVNLPIPINGNGKQ   | K | - | 2,032.05 |
| 682 | JUP Junction plakoglobin                                                                                  | IPI00554711                                                             | 81,727.90  | 192 | 203 | TMQNTSDLDTAR            | R | C | 1,352.61 |
| 683 | EEF2 Elongation factor 2                                                                                  | IPI00186290                                                             | 95,322.10  | 193 | 214 | GEGESGPMGNIMIDPVLGTV GF | Y | G | 2,177.03 |
| 684 | PFKP 6-phosphofructokinase type C                                                                         | IPI00009790                                                             | 85,579.40  | 194 | 210 | IIEVVDAIMTTAQSHQR       | R | T | 1,912.00 |
| 685 | ACTN4 Alpha-actinin-4                                                                                     | IPI00013808                                                             | 104,839.20 | 194 | 204 | DGLAFNALIHR             | K | H | 1,226.66 |

|     |                                                                                 |                                                                         |            |     |     |                     |   |   |          |
|-----|---------------------------------------------------------------------------------|-------------------------------------------------------------------------|------------|-----|-----|---------------------|---|---|----------|
| 686 | CNOT1 Isoform 1 of CCR4-NOT transcription complex subunit 1                     | IPI00166010,IPI00880052                                                 | 266,926.70 | 194 | 208 | GAFGVGQEIQIDAFK     | K | T | 1,579.81 |
| 687 | NDFIP2 NEDD4 family-interacting protein 2                                       | IPI00385038,IPI00910797,IPI00911105                                     | 36,372.50  | 194 | 207 | AAAMAAAAAETSQR      | K | I | 1,335.63 |
| 688 | RRM2 Ribonucleoside-diphosphate reductase M2 subunit                            | IPI00011118                                                             | 51,076.50  | 195 | 209 | AASDGIVNENLVERF     | F | S | 1,633.82 |
| 689 | GRB2 Isoform 1 of Growth factor receptor-bound protein 2                        | IPI00021327,IPI00792746                                                 | 25,188.80  | 196 | 207 | GACHGQTGMFPR        | K | N | 1,318.58 |
| 690 | YWHAE 14-3-3 protein epsilon                                                    | IPI00000816                                                             | 29,157.00  | 197 | 215 | AAFDDAIAELDTLSEESYK | K | D | 2,087.97 |
| 691 | ILF2 Interleukin enhancer-binding factor 2                                      | IPI00005198                                                             | 43,044.70  | 197 | 206 | VLQSALAAIR          | K | H | 1,041.64 |
| 692 | SMC2 Isoform 1 of Structural maintenance of chromosomes protein 2               | IPI00007927,IPI00232806                                                 | 135,642.70 | 197 | 209 | TILEEEITPTIQK       | K | L | 1,514.83 |
| 693 | HNRNPA2B1 43 kDa protein                                                        | IPI00874030                                                             | 43,234.30  | 197 | 216 | GKIDTIEITDRQSGKKRGF | Y | G | 2,262.26 |
| 694 | GDI2 cDNA FLJ60299, highly similar to Rab GDP dissociation inhibitor beta       | IPI00031461                                                             | 51,138.50  | 198 | 212 | TDDYLDQPCYETINR     | R | I | 1,902.82 |
| 695 | TP11 Isoform 1 of Triosephosphate isomerase                                     | IPI00465028                                                             | 30,772.80  | 198 | 212 | VVLAYEPVWAIGTGK     | K | T | 1,602.89 |
| 696 | TP11 Isoform 1 of Triosephosphate isomerase                                     | IPI00465028                                                             | 30,772.80  | 198 | 212 | VVLAYEPVWAIGTGK     | K | T | 1,602.89 |
| 697 | PAFAH1B3 Platelet-activating factor acetylhydrolase IB subunit gamma            | IPI00014808                                                             | 25,715.60  | 199 | 206 | LGYPVCR             | R | A | 965.4874 |
| 698 | PAFAH1B3 Platelet-activating factor acetylhydrolase IB subunit gamma            | IPI00014808                                                             | 25,715.60  | 199 | 206 | LGYPVCR             | R | A | 965.4874 |
| 699 | KIF4A Isoform 1 of Chromosome-associated kinesin KIF4A                          | IPI00178150,IPI00556059                                                 | 139,865.70 | 199 | 211 | TVASTAMNSQSSR       | R | S | 1,339.63 |
| 700 | HSP90AA1 heat shock protein 90kDa alpha (cytosolic), class A member 1 isoform 1 | IPI00382470,IPI00784295                                                 | 98,147.10  | 199 | 211 | HINLIPNKQDRTL       | L | T | 1,561.88 |
| 701 | HNRNPA2B1 43 kDa protein                                                        | IPI00874030                                                             | 43,234.30  | 199 | 208 | IDTIEITDR           | K | Q | 1,188.65 |
| 702 | HNRNPA2B1 43 kDa protein                                                        | IPI00874030                                                             | 43,234.30  | 199 | 208 | IDTIEITDR           | K | Q | 1,188.65 |
| 703 | POLR2B DNA-directed RNA polymerase II subunit RPB2                              | IPI00027808                                                             | 133,883.00 | 200 | 210 | MATNTVYVFAK         | K | K | 1,244.63 |
| 704 | CCT3 chaperonin containing TCP1, subunit 3 isoform b                            | IPI00290770,IPI00553185                                                 | 60,446.30  | 200 | 215 | VEKIPGGIIEDSCVLR    | R | G | 1,784.96 |
| 705 | PRDX4 Peroxiredoxin-4                                                           | IPI00011937                                                             | 30,523.10  | 201 | 208 | GLFIIDDK            | R | G | 920.509  |
| 706 | GAPDH Glyceraldehyde-3-phosphate dehydrogenase                                  | IPI00219018,IPI00795257                                                 | 36,035.30  | 201 | 215 | GALQNIIPASTGAAK     | R | A | 1,411.79 |
| 707 | TKT transketolase isoform 2                                                     | IPI00792641                                                             | 58,965.00  | 201 | 219 | ILATPPQEDAPSVDIANIR | K | M | 2,020.07 |
| 708 | PSMA7 Isoform 1 of Proteasome subunit alpha type-7                              | IPI00024175,IPI00154509,IPI00218372,IPI00219950,IPI00748423             | 28,512.20  | 202 | 212 | ALLEVVQSGGK         | K | N | 1,100.63 |
| 709 | LOC442497;SLC3A2 4F2 cell-surface antigen heavy chain                           | IPI00027493,IPI00554481,IPI00554611,IPI00554702,IPI00554722,IPI00604710 | 57,929.40  | 203 | 212 | VILDLPNYR           | R | G | 1,203.67 |
| 710 | BUB3 budding uninhibited by benzimidazoles 3 isoform b                          | IPI00514701                                                             | 36,936.50  | 203 | 216 | VAVEYLDPSPEVQK      | R | K | 1,573.81 |
| 711 | BUB3 budding uninhibited by benzimidazoles 3 isoform b                          | IPI00514701                                                             | 36,936.50  | 203 | 216 | VAVEYLDPSPEVQK      | R | K | 1,573.81 |
| 712 | MTR Methionine synthase                                                         | IPI00743284                                                             | 140,514.40 | 204 | 216 | AALFALQNLFE EK      | K | Y | 1,493.80 |
| 713 | HSP90AB1 Heat shock protein HSP 90-beta                                         | IPI00414676                                                             | 83,249.30  | 205 | 219 | HSQFIGYPITLYLEK     | K | E | 1,808.96 |
| 714 | HSP90AB1 Heat shock protein HSP 90-beta                                         | IPI00414676                                                             | 83,249.30  | 205 | 221 | HSQFIGYPITLYLEKER   | K | E | 2,094.10 |
| 715 | GNB2L1 38 kDa protein                                                           | IPI00641950,IPI00848226                                                 | 37,740.10  | 205 | 212 | VWNLANCK            | K | L | 1,004.50 |
| 716 | HNRNPH3 Isoform 1 of Heterogeneous nuclear ribonucleoprotein H3                 | IPI00013877,IPI00216492,IPI00216493                                     | 36,909.60  | 206 | 222 | ATENDIANFFSPLNPIR   | R | V | 1,918.97 |
| 717 | IPO4 Isoform 1 of Importin-4                                                    | IPI00156374,IPI00398009                                                 | 118,700.70 | 206 | 220 | LIMAMQTLIPIDEAK     | K | A | 1,686.92 |
| 718 | PC Pyruvate carboxylase, mitochondrial                                          | IPI00299402                                                             | 129,616.70 | 206 | 219 | VVHSYEELEENYTR      | R | A | 1,767.82 |
| 719 | HNRNPR Heterogeneous nuclear ribonucleoprotein R                                | IPI00012074,IPI00644055,IPI00856037,IPI00856038,IPI00910614             | 70,925.80  | 207 | 216 | GYAFITFCGK          | R | E | 1,163.56 |
| 720 | HNRNPA1 Isoform A1-B of Heterogeneous nuclear ribonucleoprotein A1              | IPI00215965,IPI00465365                                                 | 38,828.10  | 207 | 218 | GGGFGGNDNFGR        | R | G | 1,154.50 |
| 721 | HNRNPK Isoform 1 of Heterogeneous nuclear ribonucleoprotein K                   | IPI00216049,IPI00216746,IPI00514561,IPI00807545,IPI00910458             | 50,960.50  | 208 | 221 | IILDLISESPIKGR      | K | A | 1,553.93 |
| 722 | TFRC Transferrin receptor protein 1                                             | IPI00022462                                                             | 84,855.60  | 209 | 224 | LVYLVENPGGYVAYSK    | R | A | 1,771.93 |
| 723 | FAR1 cDNA: FLJ22728 fis, clone HSI15617 (Fragment)                              | IPI00386139,IPI00478838                                                 | 38,361.30  | 209 | 221 | ALAEYVVQEGAK        | K | L | 1,405.73 |
| 724 | MYH9 Isoform 1 of Myosin-9                                                      | IPI00019502                                                             | 226,519.50 | 210 | 225 | QLLQANPILEAFGNAK    | R | T | 1,726.95 |

|     |                                                                                         |                         |            |     |     |                                  |   |   |          |
|-----|-----------------------------------------------------------------------------------------|-------------------------|------------|-----|-----|----------------------------------|---|---|----------|
| 725 | DDX17 DEAD box polypeptide 17 isoform 1                                                 | IPI00023785,IPI00651653 | 80,256.00  | 210 | 221 | DMVGIAGTGSQK                     | R | T | 1,163.57 |
| 726 | EIF2B1 Translation initiation factor eIF-2B subunit alpha                               | IPI00221300             | 33,695.20  | 210 | 220 | IGTNQMAVCAK                      | K | A | 1,192.58 |
| 727 | HSP90AA1 heat shock protein 90kDa alpha (cytosolic), class A member 1 isoform 1         | IPI00382470,IPI00784295 | 98,147.10  | 210 | 222 | TLTIVDTGIGMTK                    | R | A | 1,365.73 |
| 728 | PCNA Proliferating cell nuclear antigen                                                 | IPI00021700             | 28,751.30  | 211 | 217 | YLNFFTK                          | R | A | 932.4876 |
| 729 | PFAS Phosphoribosylformylglycinamide synthase                                           | IPI00004534             | 144,645.60 | 213 | 231 | NPSTVEAFDLAQSNSEHSR              | R | H | 2,088.96 |
| 730 | ATP1A1 Isoform Long of Sodium/potassium-transporting ATPase subunit alpha-1             | IPI00006482,IPI00646182 | 112,881.50 | 213 | 227 | VDNSSLTGESEPQTR                  | K | S | 1,619.75 |
| 731 | YWHAQ 14-3-3 protein theta                                                              | IPI00018146             | 27,747.40  | 213 | 222 | DSTLIMQLLR                       | K | D | 1,189.66 |
| 732 | YWHAZ 14-3-3 protein zeta/delta                                                         | IPI00021263             | 27,727.90  | 213 | 222 | DSTLIMQLLR                       | K | D | 1,189.66 |
| 733 | TP11 Isoform 1 of Triosephosphate isomerase                                             | IPI00465028             | 30,772.80  | 213 | 225 | TATPQQAQEVHEK                    | K | L | 1,466.72 |
| 734 | TP11 Isoform 1 of Triosephosphate isomerase                                             | IPI00465028             | 30,772.80  | 213 | 225 | TATPQQAQEVHEK                    | K | L | 1,466.72 |
| 735 | RARS Isoform Complexed of Arginyl-tRNA synthetase, cytoplasmic                          | IPI00004860             | 75,364.00  | 214 | 223 | STIIGESISR                       | R | L | 1,062.58 |
| 736 | TUBB2C Tubulin beta-2C chain                                                            | IPI00007752             | 49,812.70  | 214 | 241 | TLKLTTPTYGDLNHLVSATMS<br>GVTTCLR | R | F | 3,050.57 |
| 737 | TUBB Tubulin beta chain                                                                 | IPI00011654             | 49,652.60  | 214 | 241 | TLKLTTPTYGDLNHLVSATMS<br>GVTTCLR | R | F | 3,050.57 |
| 738 | UCHL1 Ubiquitin carboxyl-terminal hydrolase isozyne L1                                  | IPI00018352             | 24,806.30  | 214 | 221 | FSAVALCK                         | R | A | 895.4706 |
| 739 | TUBB4 Tubulin beta-4 chain                                                              | IPI00023598             | 49,567.40  | 214 | 241 | TLKLTTPTYGDLNHLVSATMS<br>GVTTCLR | R | F | 3,050.57 |
| 740 | TUBB2B Tubulin beta-2B chain                                                            | IPI00031370             | 49,935.10  | 214 | 241 | TLKLTTPTYGDLNHLVSATMS<br>GVTTCLR | R | F | 3,050.57 |
| 741 | SLC25A5 ADP/ATP translocase 2                                                           | IPI00007188             | 32,878.50  | 215 | 231 | MIAQTVTAVAGLTSYPF                | W | D | 1,769.91 |
| 742 | SLC25A5 ADP/ATP translocase 2                                                           | IPI00007188             | 32,878.50  | 215 | 226 | MIAQTVTAVAGL                     | W | T | 1,174.65 |
| 743 | YWHAB Isoform Long of 14-3-3 protein beta/alpha                                         | IPI00216318,IPI00759832 | 28,065.10  | 215 | 224 | DSTLIMQLLR                       | K | D | 1,189.66 |
| 744 | SLC25A6 ADP/ATP translocase 3                                                           | IPI00291467             | 32,849.10  | 215 | 231 | MIAQTVTAVAGVVSYPF                | W | D | 1,753.92 |
| 745 | EEF1A1 Elongation factor 1-alpha 1                                                      | IPI00396485             | 50,123.20  | 215 | 229 | KVTRKDGNASGTTLL                  | W | E | 1,560.87 |
| 746 | HNRNPA2B1 43 kDa protein                                                                | IPI00874030             | 43,234.30  | 215 | 229 | GFGFVTFDDHDPVVK                  | R | I | 1,695.77 |
| 747 | YWHAE 14-3-3 protein epsilon                                                            | IPI00000816             | 29,157.00  | 216 | 225 | DSTLIMQLLR                       | K | D | 1,189.66 |
| 748 | NP cDNA FLJ25678 fis, clone TST04067, highly similar to PURINE NUCLEOSIDE PHOSPHORYLASE | IPI00017672,IPI00871140 | 32,533.50  | 216 | 233 | LGADAVGMSTVPEVIVAR               | K | H | 1,800.95 |
| 749 | ACTG1 Actin, cytoplasmic 2                                                              | IPI00021440             | 41,775.90  | 216 | 238 | LCYVALDFEQEMATAASSSSL<br>EK      | K | S | 2,550.17 |
| 750 | CCT3 chaperonin containing TCP1, subunit 3 isoform b                                    | IPI00290770,IPI00553185 | 60,446.30  | 216 | 227 | GVMINKDVTHPR                     | R | M | 1,366.73 |
| 751 | TUBB2C Tubulin beta-2C chain                                                            | IPI00007752             | 49,812.70  | 217 | 241 | LTTPTYGDLNHLVSATMSGVT<br>TCLR    | K | F | 2,708.34 |
| 752 | TUBB Tubulin beta chain                                                                 | IPI00011654             | 49,652.60  | 217 | 241 | LTTPTYGDLNHLVSATMSGVT<br>TCLR    | K | F | 2,708.34 |
| 753 | TUBB4 Tubulin beta-4 chain                                                              | IPI00023598             | 49,567.40  | 217 | 241 | LTTPTYGDLNHLVSATMSGVT<br>TCLR    | K | F | 2,708.34 |
| 754 | TUBB2B Tubulin beta-2B chain                                                            | IPI00031370             | 49,935.10  | 217 | 241 | LTTPTYGDLNHLVSATMSGVT<br>TCLR    | K | F | 2,708.34 |
| 755 | YWHAG 14-3-3 protein gamma                                                              | IPI00220642             | 28,285.10  | 218 | 227 | DSTLIMQLLR                       | K | D | 1,189.66 |
| 756 | CCT7 T-complex protein 1 subunit eta                                                    | IPI00018465             | 59,349.80  | 219 | 230 | TFSYAGFEMQPK                     | K | K | 1,405.65 |
| 757 | PTBP1 polypyrimidine tract-binding protein 1 isoform a                                  | IPI00183626,IPI00334175 | 59,616.40  | 219 | 238 | NNQFQALLQYADPVSAQHAK             | K | L | 2,243.12 |
| 758 | HNRNPF Heterogeneous nuclear ribonucleoprotein F                                        | IPI00003881             | 45,653.88  | 220 | 228 | IGIVKQAGL                        | Y | E | 898.5722 |
| 759 | PTPN23 Tyrosine-protein phosphatase non-receptor type 23                                | IPI00034006             | 178,956.60 | 220 | 232 | ALENPDTASLLGR                    | R | I | 1,356.71 |
| 760 | GAPDH Glyceraldehyde-3-phosphate dehydrogenase                                          | IPI00219018,IPI00795257 | 36,035.30  | 220 | 227 | VIPELNGK                         | K | L | 869.5092 |
| 761 | PC Pyruvate carboxylase, mitochondrial                                                  | IPI00299402             | 129,616.70 | 220 | 237 | AYSEALAAFGNGALFVEK               | R | F | 1,857.94 |
| 762 | HSPA8 Isoform 1 of Heat shock cognate 71 kDa protein                                    | IPI00003865             | 70,881.80  | 221 | 236 | STAGDTHLGGEDFDNR                 | K | M | 1,691.73 |

|     |                                                                                 |                                                 |            |     |     |                            |   |   |          |
|-----|---------------------------------------------------------------------------------|-------------------------------------------------|------------|-----|-----|----------------------------|---|---|----------|
| 763 | HSPA1A;HSPA1B Heat shock 70 kDa protein 1                                       | IPI00304925                                     | 70,036.00  | 221 | 236 | ATAGDTHLGGEDFDNR           | K | L | 1,675.73 |
| 764 | HSPA4 Heat shock 70 kDa protein 4                                               | IPI00002966                                     | 94,313.90  | 222 | 234 | VLATAFDTTLGGR              | K | K | 1,321.71 |
| 765 | UCHL3 Ubiquitin carboxyl-terminal hydrolase isozyme L3                          | IPI00011250                                     | 26,164.80  | 222 | 230 | FNAIALSAA                  | R | - | 877.4777 |
| 766 | HNRNPA2B1 43 kDa protein                                                        | IPI00874030                                     | 43,234.30  | 222 | 235 | DDHDPVKIVLQKY              | F | H | 1,684.85 |
| 767 | HSP90AA1 heat shock protein 90kDa alpha (cytosolic), class A member 1 isoform 1 | IPI00382470,IPI00784295                         | 98,147.10  | 223 | 234 | ADLNNLGTIAK                | K | S | 1,242.71 |
| 768 | RARS Isoform Complexed of Arginyl-tRNA synthetase. cytoplasmic                  | IPI00004860                                     | 75,364.00  | 224 | 234 | LFEFAGYDVLRL               | R | L | 1,329.68 |
| 769 | CDC2 Putative uncharacterized protein DKFZp686L20222                            | IPI00026689                                     | 34,762.10  | 224 | 243 | RALGTPNNEVWPEVESLQDY       | F | K | 2,317.11 |
| 770 | RPL7 60S ribosomal protein L7                                                   | IPI00030179,IPI00472171,IPI00871827,IPI00872387 | 29,209.70  | 224 | 242 | TTFVVEGGDAGNREDQINR        | K | L | 2,115.98 |
| 771 | FASN Fatty acid synthase                                                        | IPI00026781                                     | 273,382.00 | 225 | 235 | SEGVVAVLLTK                | R | K | 1,115.67 |
| 772 | GDI2 cDNA FLJ60299, highly similar to Rab GDP dissociation inhibitor beta       | IPI00031461                                     | 51,138.50  | 226 | 244 | SPYLYPLYGLGELPQGFAR        | K | L | 2,141.11 |
| 773 | UBA1 Ubiquitin-like modifier-activating enzyme 1                                | IPI00645078                                     | 117,832.30 | 227 | 239 | DNPGVVTCLEEAR              | K | H | 1,445.67 |
| 774 | KPNA2;LOC728860 Importin subunit alpha-2                                        | IPI00002214,IPI00789457                         | 57,844.50  | 228 | 238 | NLTWTLNSLNR                | R | N | 1,377.69 |
| 775 | ATP1A1 Isoform Long of Sodium/potassium-transporting ATPase subunit alpha-1     | IPI00006482,IPI00646182                         | 112,881.50 | 228 | 240 | SPDFTNENPLETR              | R | N | 1,519.70 |
| 776 | ATP1A1 Isoform Long of Sodium/potassium-transporting ATPase subunit alpha-1     | IPI00006482,IPI00646182                         | 112,881.50 | 228 | 240 | SPDFTNENPLETR              | R | N | 1,519.70 |
| 777 | DDX5 Probable ATP-dependent RNA helicase DDX5                                   | IPI00017617                                     | 69,131.70  | 228 | 236 | LIDFLECGK                  | R | T | 1,094.56 |
| 778 | YWHAZ 14-3-3 protein zeta/delta                                                 | IPI00021263                                     | 27,727.90  | 229 | 245 | TSDTQGDAAEAGEGGEN          | W | - | 1,666.63 |
| 779 | G3BP1 Ras GTPase-activating protein-binding protein 1                           | IPI00012442                                     | 52,144.80  | 230 | 247 | SSSPADIAQTQVEDLR           | K | T | 1,884.93 |
| 780 | TUBA1A Tubulin alpha-1A chain                                                   | IPI00180675                                     | 50,117.70  | 230 | 243 | LIGQIVSSITASLR             | R | F | 1,457.87 |
| 781 | EIF3B Isoform 1 of Eukaryotic translation initiation factor 3 subunit B         | IPI00396370,IPI00719752                         | 92,464.80  | 231 | 248 | GYIFLEYASPAHAVDAVK         | K | N | 1,951.00 |
| 782 | PABPC1 Isoform 1 of Polyadenylate-binding protein 1                             | IPI00008524,IPI00410017                         | 70,653.30  | 232 | 240 | GFGFVVSFER                 | K | H | 1,045.51 |
| 783 | TPI1 Isoform 1 of Triosephosphate isomerase                                     | IPI00465028                                     | 30,772.80  | 232 | 243 | SNVSDAVAQSTR               | K | I | 1,234.60 |
| 784 | TPI1 Isoform 1 of Triosephosphate isomerase                                     | IPI00465028                                     | 30,772.80  | 232 | 243 | SNVSDAVAQSTR               | K | I | 1,234.60 |
| 785 | CAND1 Isoform 1 of Cullin-associated NEDD8-dissociated protein 1                | IPI00100160,IPI00915424                         | 136,363.10 | 233 | 243 | TYIQCAAISR                 | R | Q | 1,295.68 |
| 786 | GAPDH Glyceraldehyde-3-phosphate dehydrogenase                                  | IPI00219018,IPI00795257                         | 36,035.30  | 234 | 255 | RVPTANVSVVDLTCRLEKPAK<br>Y | F | D | 2,516.37 |
| 787 | KPNB1 Importin subunit beta-1                                                   | IPI00001639                                     | 97,153.30  | 235 | 243 | VAALQNLVK                  | R | I | 955.5935 |
| 788 | ATP2A2 Isoform SERCA2A of Sarcoplasmic/endoplasmic reticulum calcium ATPase 2   | IPI00177817,IPI00219078,IPI00747443,IPI00914019 | 109,674.90 | 235 | 246 | IRDEMVAEQER                | K | T | 1,476.71 |
| 789 | GAPDH Glyceraldehyde-3-phosphate dehydrogenase                                  | IPI00219018,IPI00795257                         | 36,035.30  | 235 | 248 | VPTANVSVVDLTCR             | R | L | 1,530.79 |
| 790 | HNRNPA2B1 43 kDa protein                                                        | IPI00874030                                     | 43,234.30  | 235 | 246 | YHTINGHNAEVR               | K | K | 1,410.69 |
| 791 | PSAT1 cDNA FLJ56437, highly similar to Phosphoserine aminotransferase           | IPI00001734,IPI00219478                         | 45,338.10  | 236 | 245 | FGVIFAGAQK                 | K | N | 1,037.58 |
| 792 | EEF2 Elongation factor 2                                                        | IPI00186290                                     | 95,322.10  | 236 | 249 | FAAKGEGQLGPAER             | K | A | 1,430.74 |
| 793 | HNRNPA2B1 43 kDa protein                                                        | IPI00874030                                     | 43,234.30  | 236 | 249 | HTINGHNAEVRKAL             | Y | S | 1,559.84 |
| 794 | HSPA8 Isoform 1 of Heat shock cognate 71 kDa protein                            | IPI00003865                                     | 70,881.80  | 237 | 246 | MVNHFIAEFK                 | R | R | 1,235.62 |
| 795 | CCT3 chaperonin containing TCP1, subunit 3 isoform b                            | IPI00290770,IPI00553185                         | 60,446.30  | 237 | 247 | IVLLDSSLEYK                | R | K | 1,279.71 |
| 796 | HSPA1A;HSPA1B Heat shock 70 kDa protein 1                                       | IPI00304925                                     | 70,036.00  | 237 | 246 | LVNHFVEEFK                 | R | R | 1,261.66 |
| 797 | DHX9 ATP-dependent RNA helicase A                                               | IPI00844578                                     | 140,943.50 | 237 | 248 | LAAQSCALSLVR               | K | Q | 1,288.70 |
| 798 | MSN Moesin                                                                      | IPI00219365,IPI00872814                         | 67,803.80  | 238 | 246 | IGFPWSEIR                  | K | N | 1,104.58 |
| 799 | ACACA Isoform 1 of Acetyl-CoA carboxylase 1                                     | IPI00011569                                     | 265,538.40 | 239 | 260 | ALGDKIASSIVAQTAGIPTLPW     | W | S | 2,209.22 |
| 800 | ACTG1 Actin, cytoplasmic 2                                                      | IPI00021440                                     | 41,775.90  | 239 | 254 | SYELPDGQVITIGNER           | K | F | 1,790.89 |

|     |                                                                                |                                                             |            |     |     |                          |   |   |          |
|-----|--------------------------------------------------------------------------------|-------------------------------------------------------------|------------|-----|-----|--------------------------|---|---|----------|
| 801 | PTBP1 polypyrimidine tract-binding protein 1 isoform a                         | IPI00183626,IPI00334175                                     | 59,616.40  | 239 | 254 | LSLDGQNIYNACCTLR         | K | I | 1,897.89 |
| 802 | PPP2CA Serine/threonine-protein phosphatase 2A catalytic subunit alpha isoform | IPI00008380,IPI00815784                                     | 35,576.50  | 240 | 254 | AHQLVMEGYNWCHDR          | R | N | 1,915.83 |
| 803 | STIP1 Stress-induced-phosphoprotein 1                                          | IPI00013894,IPI00871856                                     | 62,624.10  | 240 | 246 | DFDTALK                  | K | H | 809.4041 |
| 804 | NPM1 Isoform 2 of Nucleophosmin                                                | IPI00220740,IPI00549248                                     | 29,446.90  | 240 | 247 | INYVKNCF                 | F | R | 1,057.51 |
| 805 | ENO1 Isoform alpha-enolase of Alpha-enolase                                    | IPI00465248                                                 | 47,152.20  | 240 | 253 | VVIGMDVAASEFFR           | K | S | 1,540.78 |
| 806 | TUBB2C Tubulin beta-2C chain                                                   | IPI00007752                                                 | 49,812.70  | 241 | 253 | RFPGQLNADLRKL            | L | A | 1,527.88 |
| 807 | TUBB Tubulin beta chain                                                        | IPI00011654                                                 | 49,652.60  | 241 | 253 | RFPGQLNADLRKL            | L | A | 1,527.88 |
| 808 | TUBB Tubulin beta chain                                                        | IPI00011654                                                 | 49,652.60  | 241 | 253 | RFPGQLNADLRKL            | L | A | 1,527.88 |
| 809 | ACTG1 Actin, cytoplasmic 2                                                     | IPI00021440                                                 | 41,775.90  | 241 | 255 | ELPDGQVITIGNERF          | Y | R | 1,687.87 |
| 810 | TUBB2C Tubulin beta-2C chain                                                   | IPI00007752                                                 | 49,812.70  | 242 | 251 | FPGQLNADLR               | R | K | 1,130.60 |
| 811 | PSMD3 26S proteasome non-ATPase regulatory subunit 3                           | IPI00011603                                                 | 60,961.60  | 242 | 256 | HDADGQATLLNLLLR          | R | N | 1,649.90 |
| 812 | TUBB Tubulin beta chain                                                        | IPI00011654                                                 | 49,652.60  | 242 | 251 | FPGQLNADLR               | R | K | 1,130.60 |
| 813 | TUBB4 Tubulin beta-4 chain                                                     | IPI00023598                                                 | 49,567.40  | 242 | 251 | FPGQLNADLR               | R | K | 1,130.60 |
| 814 | TUBB2B Tubulin beta-2B chain                                                   | IPI00031370                                                 | 49,935.10  | 242 | 251 | FPGQLNADLR               | R | K | 1,130.60 |
| 815 | NCL cDNA FLJ45706 fis, clone FEBRA2028457, highly similar to Nucleolin         | IPI00444262,IPI00604620,IPI00827674                         | 65,945.80  | 242 | 255 | FGYVDFESAEDLEK           | K | A | 1,648.74 |
| 816 | GNB2L1 38 kDa protein                                                          | IPI00641950,IPI00848226                                     | 37,740.10  | 242 | 254 | DGQAMLWDLNEGK            | K | H | 1,476.68 |
| 817 | ACTR1A Alpha-centractin                                                        | IPI00029468,IPI00908883                                     | 42,597.20  | 243 | 256 | LPDGSTIEIGPSRF           | Y | R | 1,488.77 |
| 818 | TUBA1A Tubulin alpha-1A chain                                                  | IPI00180675                                                 | 50,117.70  | 244 | 264 | FDGALNVDLTEFQTNLVPYPR    | R | I | 2,409.21 |
| 819 | TPI1 Isoform 1 of Triosephosphate isomerase                                    | IPI00465028                                                 | 30,772.80  | 244 | 256 | IYGGSVTGATCK             | R | E | 1,326.67 |
| 820 | TPI1 Isoform 1 of Triosephosphate isomerase                                    | IPI00465028                                                 | 30,772.80  | 244 | 256 | IYGGSVTGATCK             | R | E | 1,326.67 |
| 821 | GDI2 cDNA FLJ60299, highly similar to Rab GDP dissociation inhibitor beta      | IPI00031461                                                 | 51,138.50  | 245 | 268 | LSAIYGGTYMLNKPIEEIIVQN   | R | V | 2,651.41 |
| 822 | CCT4 T-complex protein 1 subunit delta                                         | IPI00302927,IPI00873222,IPI00893358                         | 57,907.90  | 246 | 257 | IGLIQFCLSAPK             | K | T | 1,346.75 |
| 823 | TALDO1 Transaldolase                                                           | IPI00744692,IPI00888654                                     | 37,523.70  | 246 | 258 | ALAGCDFLTISPK            | K | L | 1,392.72 |
| 824 | COPA Isoform 1 of Coatomer subunit alpha                                       | IPI00295857,IPI00646493                                     | 138,331.30 | 247 | 260 | GHYNNVSCAVFHPR           | R | Q | 1,657.77 |
| 825 | TIMELESS Isoform 1 of Protein timeless homolog                                 | IPI00335541,IPI00554678,IPI00909597                         | 138,615.50 | 247 | 257 | SADFAELEVLR              | R | Q | 1,249.64 |
| 826 | SLC1A5 Neutral amino acid transporter B(0)                                     | IPI00019472                                                 | 56,581.80  | 248 | 257 | LGPEGELLIR               | K | F | 1,096.64 |
| 827 | NPM1 Isoform 2 of Nucleophosmin                                                | IPI00220740,IPI00549248                                     | 29,446.90  | 248 | 259 | RMTDQEAIQDLW             | F | Q | 1,505.71 |
| 828 | HNRNPA2B1 43 kDa protein                                                       | IPI00874030                                                 | 43,234.30  | 248 | 261 | ALSRQEMQEVQSSR           | K | S | 1,648.81 |
| 829 | STIP1 Stress-induced-phosphoprotein 1                                          | IPI00013894,IPI00871856                                     | 62,624.10  | 249 | 261 | DKAKELDPTNMTY            | Y | I | 1,525.72 |
| 830 | NPM1 Isoform 2 of Nucleophosmin                                                | IPI00220740,IPI00549248                                     | 29,446.90  | 249 | 262 | MTDQEAIQDLWQWR           | R | K | 1,819.84 |
| 831 | MAT2A S-adenosylmethionine synthetase isoform type-2                           | IPI00010157                                                 | 43,642.80  | 250 | 264 | FVIGGPQGDAGLTGR          | R | K | 1,444.75 |
| 832 | NUP107 Nuclear pore complex protein Nup107                                     | IPI00028005                                                 | 106,358.70 | 251 | 259 | TVVEALFQR                | K | D | 1,062.59 |
| 833 | MTHFD1 C-1-tetrahydrofolate synthase, cytoplasmic                              | IPI00218342,IPI00794900                                     | 101,543.50 | 251 | 264 | KVVGDVAYDEAKER           | R | A | 1,578.81 |
| 834 | SPTAN1 cDNA FLJ61399, highly similar to Spectrin alpha chain, brain            | IPI00744706,IPI00843765,IPI00844215,IPI00871535,IPI00879810 | 282,131.80 | 251 | 259 | LFGAAEVQR                | K | F | 990.5367 |
| 835 | PSMC4 Isoform 1 of 26S protease regulatory subunit 6B                          | IPI00020042,IPI00216770,IPI00738042                         | 47,349.70  | 252 | 275 | RLAKENAPAIIFIDEIDAIATKRF | F | D | 2,715.52 |
| 836 | CSE1L Isoform 1 of Exportin-2                                                  | IPI00022744,IPI00219994                                     | 110,403.90 | 252 | 268 | LLQTDDEEEAGLLELLK        | K | S | 1,929.01 |
| 837 | TKT transketolase isoform 2                                                    | IPI00792641                                                 | 58,965.00  | 252 | 260 | IILDGDTK                 | R | N | 945.5254 |
| 838 | HNRNPA2B1 43 kDa protein                                                       | IPI00874030                                                 | 43,234.30  | 252 | 261 | QEMQEVQSSR               | R | S | 1,221.55 |
| 839 | HNRNPA2B1 43 kDa protein                                                       | IPI00874030                                                 | 43,234.30  | 252 | 261 | QEMQEVQSSR               | R | S | 1,221.55 |
| 840 | HNRNPA2B1 43 kDa protein                                                       | IPI00874030                                                 | 43,234.30  | 252 | 261 | QEMQEVQSSR               | R | S | 1,221.55 |
| 841 | TUBB2C Tubulin beta-2C chain                                                   | IPI00007752                                                 | 49,812.70  | 253 | 262 | LAVNMVPFPR               | K | L | 1,143.63 |
| 842 | TUBB Tubulin beta chain                                                        | IPI00011654                                                 | 49,652.60  | 253 | 262 | LAVNMVPFPR               | K | L | 1,143.63 |
| 843 | TUBB Tubulin beta chain                                                        | IPI00011654                                                 | 49,652.60  | 253 | 262 | LAVNMVPFPR               | K | L | 1,143.63 |
| 844 | TUBB4 Tubulin beta-4 chain                                                     | IPI00023598                                                 | 49,567.40  | 253 | 262 | LAVNMVPFPR               | K | L | 1,143.63 |
| 845 | TUBB2B Tubulin beta-2B chain                                                   | IPI00031370                                                 | 49,935.10  | 253 | 262 | LAVNMVPFPR               | K | L | 1,143.63 |

|     |                                                                                                                                  |                                                             |            |     |     |                       |   |   |          |
|-----|----------------------------------------------------------------------------------------------------------------------------------|-------------------------------------------------------------|------------|-----|-----|-----------------------|---|---|----------|
| 846 | AASDHPT L-aminoadipate-semialdehyde dehydrogenase-phosphopantetheinyl transferase                                                | IPI00250297                                                 | 35,759.10  | 253 | 267 | HQDVPSQDDSKPTQR       | R | Q | 1,737.82 |
| 847 | ENO1 Isoform alpha-enolase of Alpha-enolase                                                                                      | IPI00465248                                                 | 47,152.20  | 254 | 269 | SGKYDLDFKSPDDPSR      | R | Y | 1,826.86 |
| 848 | PPP2CA Serine/threonine-protein phosphatase 2A catalytic subunit alpha isoform                                                   | IPI00008380,IPI00815784                                     | 35,576.50  | 255 | 268 | NVVTIFSAPNYCYR        | R | C | 1,703.82 |
| 849 | DDX17 DEAD box polypeptide 17 isoform 1                                                                                          | IPI00023785,IPI00651653                                     | 80,256.00  | 255 | 269 | ELAQQVQQVADDYQK       | R | C | 1,691.82 |
| 850 | PRPF6 Pre-mRNA-processing factor 6                                                                                               | IPI00305068                                                 | 106,909.70 | 255 | 271 | LSQVSDSVSGQTVVDPK     | R | G | 1,745.89 |
| 851 | PSMD13 proteasome 26S non-ATPase subunit 13 isoform 2                                                                            | IPI00375380,IPI00549672                                     | 42,924.90  | 255 | 272 | TAWGQQPDLAANEAQLLR    | K | K | 1,982.01 |
| 852 | PSMC4 Isoform 1 of 26S protease regulatory subunit 6B                                                                            | IPI00020042,IPI00216770,IPI00738042                         | 47,349.70  | 256 | 273 | ENAPAIIFIDEIDAIATK    | K | R | 1,944.03 |
| 853 | IRS4 Insulin receptor substrate 4                                                                                                | IPI00020729                                                 | 133,751.30 | 256 | 267 | LCLTDEEVVFR           | R | L | 1,479.75 |
| 854 | EEF1A1 Elongation factor 1-alpha 1                                                                                               | IPI00396485                                                 | 50,123.20  | 256 | 266 | IGGIGTVPVGR           | K | V | 1,025.61 |
| 855 | ARS2 Isoform 2 of Arsenite-resistance protein 2                                                                                  | IPI00220038,IPI00375144,IPI00888085,IPI00888510             | 100,261.00 | 257 | 266 | MEGGTENDLR            | K | I | 1,121.49 |
| 856 | RANBP2 E3 SUMO-protein ligase RanBP2                                                                                             | IPI00221325                                                 | 358,180.20 | 257 | 270 | ELLQSFDSALQSVK        | R | S | 1,564.82 |
| 857 | EXOSC9 Isoform 2 of Exosome complex exonuclease RRP45                                                                            | IPI00029697,IPI00654592                                     | 50,786.00  | 258 | 267 | VAEITELILK            | K | A | 1,128.69 |
| 858 | NP cDNA FLJ25678 fis, clone TST04067, highly similar to PURINE NUCLEOSIDE PHOSPHORYLASE                                          | IPI00017672,IPI00871140                                     | 32,533.50  | 259 | 269 | ANHEEVLAAGK           | K | Q | 1,138.59 |
| 859 | PSMC5 26S protease regulatory subunit 8                                                                                          | IPI00023919,IPI00555749,IPI00745502                         | 45,609.10  | 259 | 271 | LEGGSGGDSEVQR         | R | T | 1,290.59 |
| 860 | ISYNA1 cDNA FLJ34860 fis, clone NT2NE2012790, highly similar to Homo sapiens myo-inositol 1-phosphate synthase A1 (ISYNA1), mRNA | IPI00478861,IPI00549569,IPI00640098,IPI00644161,IPI00645069 | 55,118.10  | 259 | 271 | SVLVDFLIGSGLK         | K | T | 1,347.79 |
| 861 | TALDO1 Transaldolase                                                                                                             | IPI00744692,IPI00888654                                     | 37,523.70  | 259 | 269 | LLGELLQDNAK           | K | L | 1,213.68 |
| 862 | RARS Isoform Complexed of Arginyl-tRNA synthetase, cytoplasmic                                                                   | IPI00004860                                                 | 75,364.00  | 261 | 273 | TVSPPIGDLQVYF         | L | K | 1,435.75 |
| 863 | CDC2 Putative uncharacterized protein DKFZp686L20222                                                                             | IPI00026689                                                 | 34,762.10  | 261 | 272 | NLDENGLDLLSK          | K | M | 1,330.69 |
| 864 | PCBP2 poly(rC) binding protein 2 isoform b                                                                                       | IPI00012066,IPI00470509,IPI00791223,IPI00796337             | 38,204.50  | 262 | 274 | SGIESSSPEVKGY         | F | W | 1,339.64 |
| 865 | PCBP2 poly(rC) binding protein 2 isoform b                                                                                       | IPI00012066,IPI00470509,IPI00791223,IPI00796337             | 38,204.50  | 262 | 274 | SGIESSSPEVKGY         | F | W | 1,339.64 |
| 866 | SNRNP200 Isoform 1 of U5 small nuclear ribonucleoprotein 200 kDa helicase                                                        | IPI00420014                                                 | 244,495.80 | 262 | 270 | DIDAFWLQR             | R | Q | 1,163.58 |
| 867 | TUBB2C Tubulin beta-2C chain                                                                                                     | IPI00007752                                                 | 49,812.70  | 263 | 276 | LHFFMPGFAPLTSR        | R | G | 1,620.84 |
| 868 | TUBB Tubulin beta chain                                                                                                          | IPI00011654                                                 | 49,652.60  | 263 | 276 | LHFFMPGFAPLTSR        | R | G | 1,620.84 |
| 869 | TUBB4 Tubulin beta-4 chain                                                                                                       | IPI00023598                                                 | 49,567.40  | 263 | 276 | LHFFMPGFAPLTSR        | R | G | 1,620.84 |
| 870 | TUBB2B Tubulin beta-2B chain                                                                                                     | IPI00031370                                                 | 49,935.10  | 263 | 276 | LHFFMPGFAPLTSR        | R | G | 1,620.84 |
| 871 | MSN Moesin                                                                                                                       | IPI00219365,IPI00872814                                     | 67,803.80  | 264 | 273 | APDFVYFAPR            | K | L | 1,182.59 |
| 872 | TUBA1A Tubulin alpha-1A chain                                                                                                    | IPI00180675                                                 | 50,117.70  | 265 | 280 | IHFPLATYAPVISA EK     | R | A | 1,756.96 |
| 873 | HNRNPU cDNA FLJ44920 fis, clone BRAMY3011501, highly similar to Heterogeneous nuclear ribonucleoprotein U                        | IPI00640106,IPI00644079                                     | 83,067.80  | 265 | 272 | VTEKIPVR              | K | H | 941.5779 |
| 874 | RPLP0 60S acidic ribosomal protein P0                                                                                            | IPI00008530,IPI00556485,IPI00791448                         | 34,256.30  | 267 | 297 | AFLADPSAFVAAAPVAAATTA | K | V | 2,752.47 |
| 875 | ACACA Isoform 1 of Acetyl-CoA carboxylase 1                                                                                      | IPI00011569                                                 | 265,538.40 | 267 | 276 | APAAAAAPAK            | R | R | 1,267.56 |
| 876 | PLS3 platin 3                                                                                                                    | IPI00216694                                                 | 70,795.90  | 267 | 275 | LSPEELLR              | K | W | 1,069.63 |
| 877 | EEF1A1 Elongation factor 1-alpha 1                                                                                               | IPI00396485                                                 | 50,123.20  | 267 | 290 | VETGVLPKGMVVFAPVNV    | R | S | 2,515.38 |
| 878 | IRS4 Insulin receptor substrate 4                                                                                                | IPI00020729                                                 | 133,751.30 | 268 | 283 | LNTEVASVVVQLLSIR      | R | R | 1,741.02 |
| 879 | CSE1L Isoform 1 of Exportin-2                                                                                                    | IPI00022744,IPI00219994                                     | 110,403.90 | 269 | 281 | SQICDNAALYAQK         | K | Y | 1,481.71 |
| 880 | PTPN1 Tyrosine-protein phosphatase non-receptor type 1                                                                           | IPI00297261                                                 | 49,949.70  | 269 | 279 | FSYLAVIEGAK           | R | F | 1,197.65 |
| 881 | HNRNPA2B1 43 kDa protein                                                                                                         | IPI00874030                                                 | 43,234.30  | 269 | 288 | GFGDSRGGGGNFGPGPGSN   | F | R | 1,840.80 |
| 882 | MCM6 DNA replication licensing factor MCM6                                                                                       | IPI00031517                                                 | 92,872.60  | 270 | 282 | VSGVDGYETEGIR         | R | G | 1,381.66 |
| 883 | PSMC5 26S protease regulatory subunit 8                                                                                          | IPI00023919,IPI00555749,IPI00745502                         | 45,609.10  | 272 | 287 | TMLELLNQLDGF EATK     | R | N | 1,822.93 |
| 884 | SLC25A5 ADP/ATP translocase 2                                                                                                    | IPI00007188                                                 | 32,878.50  | 273 | 280 | GAWSNVLR              | K | G | 902.4842 |



|     |                                                                                                           |                                                                         |            |     |     |                              |   |   |          |
|-----|-----------------------------------------------------------------------------------------------------------|-------------------------------------------------------------------------|------------|-----|-----|------------------------------|---|---|----------|
| 885 | IGF2BP1 Insulin-like growth factor 2 mRNA-binding protein 1                                               | IPI00008557                                                             | 63,438.30  | 273 | 280 | TADDEVPLK                    | K | T | 872.4725 |
| 886 | NONO Non-POU domain-containing octamer-binding protein                                                    | IPI00304596                                                             | 54,213.60  | 273 | 287 | ALIEMEKQQQDQVDR              | K | N | 1,830.90 |
| 887 | CDC37 Hsp90 co-chaperone Cdc37                                                                            | IPI00113122                                                             | 44,450.20  | 274 | 283 | AMKEYEEEEER                  | K | K | 1,313.57 |
| 888 | EEF2 Elongation factor 2                                                                                  | IPI00186290                                                             | 95,322.10  | 274 | 289 | SKSATSPEGKKLPRTF             | F | C | 1,733.95 |
| 889 | HSP90AB1 Heat shock protein HSP 90-beta                                                                   | IPI00414676                                                             | 83,249.30  | 274 | 284 | EKYIDQEELNK                  | K | T | 1,408.70 |
| 890 | PCBP2 poly(rC) binding protein 2 isoform b                                                                | IPI00012066,IPI00470509,IPI00791223,IPI00796337                         | 38,204.50  | 275 | 289 | WAGLDASAQTTSHEL              | Y | T | 1,586.74 |
| 891 | FASN Fatty acid synthase                                                                                  | IPI00026781                                                             | 273,382.00 | 275 | 298 | SLYQSAGVAPESFEYIEAHGT<br>GTK | R | V | 2,542.21 |
| 892 | HSP90AB1 Heat shock protein HSP 90-beta                                                                   | IPI00414676                                                             | 83,249.30  | 276 | 284 | YIDQEELNK                    | K | T | 1,151.56 |
| 893 | NUDC Nuclear migration protein nudC                                                                       | IPI00550746,IPI00871312                                                 | 38,225.70  | 276 | 284 | LSDLDSETR                    | K | S | 1,035.50 |
| 894 | G3BP2 Isoform A of Ras GTPase-activating protein-binding protein 2                                        | IPI00009057,IPI00179890                                                 | 54,102.30  | 278 | 290 | VEAKPEVQSQPPR                | R | V | 1,464.78 |
| 895 | TCP1 T-complex protein 1 subunit alpha                                                                    | IPI00290566                                                             | 60,327.20  | 278 | 298 | ILATGANVILTTGGIDDMCLK        | K | Y | 2,176.14 |
| 896 | TIMELESS Isoform 1 of Protein timeless homolog                                                            | IPI00335541,IPI00554678,IPI00909597                                     | 138,615.50 | 278 | 288 | FGGSYIVQGLK                  | R | S | 1,168.64 |
| 897 | HNRNPU cDNA FLJ44920 fis, clone BRAMY3011501, highly similar to Heterogeneous nuclear ribonucleoprotein U | IPI00640106,IPI00644079                                                 | 83,067.80  | 278 | 285 | DIDIHEVR                     | K | I | 996.511  |
| 898 | POR NADPH--cytochrome P450 reductase                                                                      | IPI00470467,IPI00792395,IPI00880028,IPI00903331,IPI00908675,IPI00910178 | 76,672.90  | 280 | 290 | NPFLAAVTTNR                  | K | K | 1,203.65 |
| 899 | TKT transketolase isoform 2                                                                               | IPI00792641                                                             | 58,965.00  | 281 | 302 | IAEQNMVSIIVGCATRNRTVP<br>F   | Y | C | 2,434.23 |
| 900 | TUBB Tubulin beta chain                                                                                   | IPI00011654                                                             | 49,652.60  | 282 | 294 | RALTVPELTQQVF                | Y | D | 1,501.84 |
| 901 | ACTN1 Alpha-actinin-1                                                                                     | IPI00013508,IPI00759776,IPI00909239                                     | 103,043.00 | 282 | 291 | LASDLLEWIR                   | K | R | 1,215.67 |
| 902 | TUBB2C Tubulin beta-2C chain                                                                              | IPI00007752                                                             | 49,812.70  | 283 | 297 | ALTVPELTQQMFDAK              | R | N | 1,691.87 |
| 903 | TUBB Tubulin beta chain                                                                                   | IPI00011654                                                             | 49,652.60  | 283 | 297 | ALTVPELTQQVFDK               | R | N | 1,659.90 |
| 904 | TUBB4 Tubulin beta-4 chain                                                                                | IPI00023598                                                             | 49,567.40  | 283 | 297 | ALTVPELTQQMFDAK              | R | N | 1,691.87 |
| 905 | AARS Alanyl-tRNA synthetase, cytoplasmic                                                                  | IPI00027442,IPI00910701                                                 | 106,795.20 | 283 | 296 | VGAEDADGIDMAYR               | K | V | 1,482.65 |
| 906 | IPO7 Importin-7                                                                                           | IPI00007402                                                             | 119,501.50 | 284 | 294 | EYNEFAEVFLK                  | K | A | 1,388.67 |
| 907 | PPP2CA Serine/threonine-protein phosphatase 2A catalytic subunit alpha isoform                            | IPI00008380,IPI00815784                                                 | 35,576.50  | 284 | 294 | YSFLQFDPAPR                  | K | R | 1,340.66 |
| 908 | COPG Coatomer subunit gamma                                                                               | IPI00783982                                                             | 97,701.40  | 284 | 300 | ELAPAVSVLQLFCSSPK            | K | A | 1,845.98 |
| 909 | ARMC6 Armadillo repeat-containing protein 6                                                               | IPI00020196,IPI00470847,IPI00871811                                     | 54,123.50  | 285 | 302 | AFLDNPGLSELGTLR              | K | L | 1,963.00 |
| 910 | PSMC2 26S protease regulatory subunit 7                                                                   | IPI00021435                                                             | 48,617.60  | 285 | 297 | FDDGAGGDNEVQR                | R | T | 1,379.58 |
| 911 | NAPA Alpha-soluble NSF attachment protein                                                                 | IPI00009253                                                             | 33,216.10  | 286 | 295 | TIQGDEEDLR                   | K | - | 1,175.55 |
| 912 | SPTAN1 cDNA FLJ61399, highly similar to Spectrin alpha chain, brain                                       | IPI00744706,IPI00843765,IPI00844215,IPI00871535,IPI00879810             | 282,131.80 | 286 | 295 | DLASVQALLR                   | R | K | 1,085.63 |
| 913 | CDC37 Hsp90 co-chaperone Cdc37                                                                            | IPI00013122                                                             | 44,450.20  | 287 | 307 | LGPGLDPVEVYESLPEELQ<br>K     | R | C | 2,269.16 |
| 914 | HNRNPH3 Isoform 1 of Heterogeneous nuclear ribonucleoprotein H3                                           | IPI00013877,IPI00216492,IPI00216493                                     | 36,909.60  | 288 | 301 | DGMDNQGGYGSVGR               | R | M | 1,412.59 |
| 915 | PSMC4 Isoform 1 of 26S protease regulatory subunit 6B                                                     | IPI00020042,IPI00216770,IPI00738042                                     | 47,349.70  | 288 | 306 | ILLELLNQMDGFDQNVNVK          | R | V | 2,203.14 |
| 916 | EEF2 Elongation factor 2                                                                                  | IPI00186290                                                             | 95,322.10  | 288 | 299 | TFCQLILDPIFK                 | R | V | 1,494.80 |
| 917 | EEF2 Elongation factor 2                                                                                  | IPI00186290                                                             | 95,322.10  | 288 | 299 | TFCQLILDPIFK                 | R | V | 1,494.80 |
| 918 | EEF2 Elongation factor 2                                                                                  | IPI00186290                                                             | 95,322.10  | 288 | 299 | TFCQLILDPIFK                 | R | V | 1,494.80 |
| 919 | PLS3 plastin 3                                                                                            | IPI00216694                                                             | 70,795.90  | 289 | 300 | INNFSADIKDSK                 | K | A | 1,351.69 |
| 920 | RARS Isoform Complexed of Arginyl-tRNA synthetase, cytoplasmic                                            | IPI00004860                                                             | 75,364.00  | 290 | 300 | AYQCVVLLQGK                  | R | N | 1,278.69 |
| 921 | HSP90AB1 Heat shock protein HSP 90-beta                                                                   | IPI00414676                                                             | 83,249.30  | 290 | 301 | TRNPDDITQEEY                 | W | G | 1,480.66 |
| 922 | HSP90AB1 Heat shock protein HSP 90-beta                                                                   | IPI00414676                                                             | 83,249.30  | 290 | 305 | TRNPDDITQEEYGEFY             | W | K | 1,976.85 |
| 923 | CCT7 T-complex protein 1 subunit eta                                                                      | IPI00018465                                                             | 59,349.80  | 291 | 302 | SKLPIGDVATQY                 | L | F | 1,291.69 |
| 924 | ACTG1 Actin, cytoplasmic 2                                                                                | IPI00021440                                                             | 41,775.90  | 292 | 312 | DLYANTVLSGGTTMYPGIADR        | K | M | 2,215.07 |
| 925 | DNM1L Isoform 5 of Dynamin-1-like protein                                                                 | IPI00037283,IPI00146935,IPI00235412,IPI00473085,IPI00555883,IPI00871742 | 85,362.60  | 292 | 300 | LGIIGVVNR                    | K | S | 940.5939 |
| 926 | HSP90AB1 Heat shock protein HSP 90-beta                                                                   | IPI00414676                                                             | 83,249.30  | 292 | 306 | NPDDITQEEYGEFYK              | R | S | 1,847.80 |



|     |                                                                                 |                                                 |            |     |     |                                  |   |   |          |
|-----|---------------------------------------------------------------------------------|-------------------------------------------------|------------|-----|-----|----------------------------------|---|---|----------|
| 927 | HSP90AB1 Heat shock protein HSP 90-beta                                         | IPI00414676                                     | 83,249.30  | 292 | 306 | NPDDITQEEYGEFYK                  | R | S | 1,847.80 |
| 928 | KPNA6 cDNA FLJ53229, highly similar to Importin alpha-7 subunit                 | IPI00747764                                     | 60,563.50  | 292 | 302 | IQAVIDSGVCR                      | K | R | 1,217.63 |
| 929 | SPTBN1 Isoform Long of Spectrin beta chain, brain 1                             | IPI00005614,IPI00871932                         | 274,595.40 | 293 | 302 | VLDNAIETEK                       | K | M | 1,131.59 |
| 930 | CCT7 T-complex protein 1 subunit eta                                            | IPI00018465                                     | 59,349.80  | 293 | 306 | LPIGDVATQYFADR                   | K | D | 1,565.80 |
| 931 | ACTR1A Alpha-centractin                                                         | IPI00029468,IPI00908883                         | 42,597.20  | 293 | 308 | TLFSNIVLSGGSTLTK                 | R | G | 1,683.93 |
| 932 | CCT3 chaperonin containing TCP1, subunit 3 isoform b                            | IPI00290770,IPI00553185                         | 60,446.30  | 294 | 305 | GISDLAQHYLMR                     | K | A | 1,403.71 |
| 933 | GNB2L1 38 kDa protein                                                           | IPI00641950,IPI00848226                         | 37,740.10  | 294 | 309 | IIVDELKQEVISTSSK                 | K | A | 1,789.00 |
| 934 | IPO7 Importin-7                                                                 | IPI00007402                                     | 119,501.50 | 295 | 306 | AFAVGVQQVLLK                     | K | V | 1,272.77 |
| 935 | MCM6 DNA replication licensing factor MCM6                                      | IPI00031517                                     | 92,872.60  | 296 | 309 | LVFLACCVAPTNPR                   | R | F | 1,617.82 |
| 936 | HNRNPA2B1 43 kDa protein                                                        | IPI00874030                                     | 43,234.30  | 296 | 308 | GSGRFGDGYNGY                     | Y | G | 1,306.54 |
| 937 | NCL cDNA FLJ45706 fis, clone FEBRA2028457, highly similar to Nucleolin          | IPI00444262,IPI00604620,IPI00827674             | 65,945.80  | 297 | 313 | VTQDELKEVFEDAAEIR                | K | L | 1,991.99 |
| 938 | TUBB2C Tubulin beta-2C chain                                                    | IPI00007752                                     | 49,812.70  | 298 | 306 | NMMAACDPR                        | K | H | 1,081.42 |
| 939 | SMC2 Isoform 1 of Structural maintenance of chromosomes protein 2               | IPI00007927,IPI00232806                         | 135,642.70 | 298 | 308 | SLEDALAEAQR                      | R | V | 1,202.60 |
| 940 | TUBB Tubulin beta chain                                                         | IPI00011654                                     | 49,652.60  | 298 | 306 | NMMAACDPR                        | K | H | 1,081.42 |
| 941 | PCBP1 Poly(rC)-binding protein 1                                                | IPI00016610                                     | 37,480.20  | 298 | 306 | QGANINEIR                        | R | Q | 1,014.53 |
| 942 | PSMC2 26S protease regulatory subunit 7                                         | IPI00021435                                     | 48,617.60  | 298 | 312 | TMLELINQLDGFDPDR                 | R | G | 1,761.88 |
| 943 | TUBB4 Tubulin beta-4 chain                                                      | IPI00023598                                     | 49,567.40  | 298 | 306 | NMMAACDPR                        | K | H | 1,081.42 |
| 944 | TUBB2B Tubulin beta-2B chain                                                    | IPI00031370                                     | 49,935.10  | 298 | 306 | NMMAACDPR                        | K | H | 1,081.42 |
| 945 | SFPQ Isoform Long of Splicing factor, proline- and glutamine-rich               | IPI00010740                                     | 76,131.50  | 299 | 315 | LFVGNLPPADITEDEFKR               | R | L | 1,964.01 |
| 946 | EIF3I Eukaryotic translation initiation factor 3 subunit I                      | IPI00012795                                     | 36,484.00  | 299 | 310 | SYSSGGEDGYVR                     | K | I | 1,276.54 |
| 947 | FASN Fatty acid synthase                                                        | IPI00026781                                     | 273,382.00 | 299 | 310 | VGDPQELNGITR                     | K | A | 1,298.67 |
| 948 | FASN Fatty acid synthase                                                        | IPI00026781                                     | 273,382.00 | 299 | 310 | VGDPQELNGITR                     | K | A | 1,298.67 |
| 949 | FASN Fatty acid synthase                                                        | IPI00026781                                     | 273,382.00 | 299 | 310 | VGDPQELNGITR                     | K | A | 1,298.67 |
| 950 | NCAPD2 Condensin complex subunit 1                                              | IPI00299524                                     | 157,155.30 | 299 | 310 | GFAAFLTELAER                     | K | V | 1,324.69 |
| 951 | HSPA8 Isoform 1 of Heat shock cognate 71 kDa protein                            | IPI00003865                                     | 70,881.80  | 300 | 311 | ARFEELNADLFR                     | R | G | 1,480.75 |
| 952 | HNRNPF Heterogeneous nuclear ribonucleoprotein F                                | IPI00003881                                     | 45,653.80  | 300 | 316 | ATENDIYNFFSPLNPVR                | K | V | 1,996.98 |
| 953 | HNRNPH1 Heterogeneous nuclear ribonucleoprotein H                               | IPI00013881,IPI00479191                         | 49,211.80  | 300 | 316 | ATENDIYNFFSPLNPVR                | R | V | 1,996.98 |
| 954 | LDHB L-lactate dehydrogenase B chain                                            | IPI00219217                                     | 36,620.60  | 300 | 308 | GLTSVINQK                        | R | L | 959.5521 |
| 955 | HNRNPA2B1 43 kDa protein                                                        | IPI00874030                                     | 43,234.30  | 300 | 327 | GFGDGYNGYGGGPGGGNFG<br>GSPGYGGGR | R | G | 2,495.04 |
| 956 | ACTN4 Alpha-actinin-4                                                           | IPI00013808                                     | 104,839.20 | 301 | 310 | LASDLLEWIR                       | K | R | 1,215.67 |
| 957 | AOF2 Isoform 2 of Lysine-specific histone demethylase 1                         | IPI00217540,IPI00456631                         | 95,137.70  | 301 | 315 | VIIIGSGVSGLAAAR                  | K | Q | 1,383.83 |
| 958 | PSMD13 proteasome 26S non-ATPase subunit 13 isoform 2                           | IPI00375380,IPI00549672                         | 42,924.90  | 304 | 315 | ITVNEVELLMK                      | K | A | 1,387.79 |
| 959 | GNB1 Guanine nucleotide-binding protein G(I)/G(S)/G(T) subunit beta-1           | IPI00026268,IPI00642117                         | 37,359.50  | 305 | 314 | AGVLAGHDNR                       | R | V | 1,009.52 |
| 960 | TOP2A Isoform 3 of DNA topoisomerase 2-alpha                                    | IPI00218753,IPI00414101,IPI00478232,IPI00879004 | 178,700.70 | 307 | 321 | GFQQISFVNSIATSK                  | K | S | 1,626.85 |
| 961 | CCT4 T-complex protein 1 subunit delta                                          | IPI00302927,IPI00873222,IPI00893358             | 57,907.90  | 307 | 319 | DALSDLALHFLNK                    | R | M | 1,456.78 |
| 962 | HSP90AB1 Heat shock protein HSP 90-beta                                         | IPI00414676                                     | 83,249.30  | 307 | 319 | SLTNDWEDHLAVK                    | K | H | 1,527.74 |
| 963 | ENO1 Isoform alpha-enolase of Alpha-enolase                                     | IPI00465248                                     | 47,152.20  | 307 | 327 | FTASAGIQVVGDDLTVTNPKR            | K | I | 2,189.16 |
| 964 | ENO1 Isoform alpha-enolase of Alpha-enolase                                     | IPI00465248                                     | 47,152.20  | 307 | 326 | FTASAGIQVVGDDLTVTNPK             | K | R | 2,033.06 |
| 965 | FAM62A Isoform 1 of Extended synaptotagmin-1                                    | IPI00022143,IPI00746655,IPI00902463             | 122,841.10 | 308 | 323 | LLVPLVPDLQDVAQLR                 | R | S | 1,789.06 |
| 966 | PSMD1 Isoform 1 of 26S proteasome non-ATPase regulatory subunit 1               | IPI00299608,IPI00456695                         | 105,821.20 | 308 | 323 | VGKTPASPEPKDQTL                  | F | K | 1,696.88 |
| 967 | HSP90AA1 heat shock protein 90kDa alpha (cytosolic), class A member 1 isoform 1 | IPI00382470,IPI00784295                         | 98,147.10  | 308 | 323 | VILHLKEDQTEYLEER                 | K | R | 2,015.04 |

|      |                                                                              |                                                                         |            |     |     |                             |   |   |          |
|------|------------------------------------------------------------------------------|-------------------------------------------------------------------------|------------|-----|-----|-----------------------------|---|---|----------|
| 968  | ATP6V1A V-type proton ATPase catalytic subunit A                             | IPI00007682                                                             | 68,287.40  | 309 | 323 | TALVANTSNMMPVAAR            | R | E | 1,515.79 |
| 969  | PTBP1 polypyrimidine tract-binding protein 1 isoform a                       | IPI00183626,IPI00334175                                                 | 59,616.40  | 309 | 325 | AGAGFPPTFAIPQAAGL           | Y | S | 1,585.84 |
| 970  | LDHB L-lactate dehydrogenase B chain                                         | IPI00219217                                                             | 36,620.60  | 309 | 319 | LKDDEVAQLKK                 | K | S | 1,286.73 |
| 971  | HNRNPA2B1 43 kDa protein                                                     | IPI00874030                                                             | 43,234.30  | 309 | 330 | GGGPGGGNFGGSPGYGGG<br>RGGY  | Y | G | 1,841.80 |
| 972  | TUBB2C Tubulin beta-2C chain                                                 | IPI00007752                                                             | 49,812.70  | 310 | 318 | YLTVAAVFR                   | R | G | 1,039.59 |
| 973  | TUBB Tubulin beta chain                                                      | IPI00011654                                                             | 49,652.60  | 310 | 318 | YLTVAAVFR                   | R | G | 1,039.59 |
| 974  | TUBB4 Tubulin beta-4 chain                                                   | IPI00023598                                                             | 49,567.40  | 310 | 318 | YLTVAAVFR                   | R | G | 1,039.59 |
| 975  | GAPDH Glyceraldehyde-3-phosphate dehydrogenase                               | IPI00219018,IPI00795257                                                 | 36,035.30  | 310 | 323 | LISWYDNEFGYSNR              | K | V | 1,763.80 |
| 976  | YARS Tyrosyl-tRNA synthetase, cytoplasmic                                    | IPI00007074                                                             | 59,127.10  | 311 | 319 | NSVEVALNK                   | K | L | 973.5312 |
| 977  | ATIC Bifunctional purine biosynthesis protein PURH                           | IPI00289499                                                             | 64,598.50  | 312 | 331 | MSSFGDFVALSDVCDVPTAK        | R | I | 2,145.98 |
| 978  | CDC37 Hsp90 co-chaperone Cdc37                                               | IPI00013122                                                             | 44,450.20  | 313 | 323 | DVQMLQDAISK                 | K | M | 1,247.63 |
| 979  | PCBP1 Poly(rC)-binding protein 1                                             | IPI00016610                                                             | 37,480.20  | 315 | 325 | IANPVEGSSGR                 | K | Q | 1,086.55 |
| 980  | GAPDH Glyceraldehyde-3-phosphate dehydrogenase                               | IPI00219018,IPI00795257                                                 | 36,035.30  | 315 | 320 | DNEFGY                      | Y | S | 744.2835 |
| 981  | PCCA propionyl-Coenzyme A carboxylase, alpha polypeptide isoform a precursor | IPI00744115,IPI00796978,IPI00895869                                     | 80,041.20  | 315 | 325 | AMGEQAVALAR                 | R | A | 1,116.58 |
| 982  | STIP1 Stress-induced-phosphoprotein 1                                        | IPI00013894,IPI00871856                                                 | 62,624.10  | 316 | 325 | YKDAIHFYNK                  | K | S | 1,298.65 |
| 983  | ACTG1 Actin, cytoplasmic 2                                                   | IPI00021440                                                             | 41,775.90  | 316 | 326 | EITALAPSTMK                 | K | I | 1,161.62 |
| 984  | NUDC Nuclear migration protein nudC                                          | IPI00550746,IPI00871312                                                 | 38,225.70  | 316 | 327 | FMDQHPMDFSK                 | K | A | 1,511.63 |
| 985  | HNRNPF Heterogeneous nuclear ribonucleoprotein F                             | IPI00003881                                                             | 45,653.80  | 317 | 326 | VHIEIGPDGR                  | R | V | 1,092.58 |
| 986  | HNRNPH1 Heterogeneous nuclear ribonucleoprotein H                            | IPI00013881,IPI00479191                                                 | 49,211.80  | 317 | 326 | VHIEIGPDGR                  | R | V | 1,092.58 |
| 987  | XPOT Exportin-T                                                              | IPI00306290                                                             | 109,948.60 | 317 | 328 | NAQEALQAIETK                | K | V | 1,315.69 |
| 988  | SSB Lupus La protein                                                         | IPI00009032,IPI00916802                                                 | 46,821.00  | 318 | 328 | IIEDQQESLNK                 | K | W | 1,316.67 |
| 989  | RUVBL1 Isoform 1 of RuvB-like 1                                              | IPI00021187                                                             | 50,211.40  | 318 | 333 | ALESSIAPIVIFASNR            | R | G | 1,687.94 |
| 990  | FKBP4 FK506-binding protein 4                                                | IPI00219005                                                             | 51,787.90  | 319 | 331 | LASHLNLAMCHLK               | R | L | 1,507.79 |
| 991  | NCAPD3 Condensin-2 complex subunit D3                                        | IPI00747787                                                             | 168,876.10 | 319 | 331 | APLAVTSQVINCR               | R | N | 1,428.76 |
| 992  | GARS Glycyl-tRNA synthetase                                                  | IPI00783097,IPI00915808                                                 | 83,123.50  | 319 | 331 | LPFAAAQIGNSFR               | K | N | 1,391.74 |
| 993  | PCBP2 poly(rC) binding protein 2 isoform b                                   | IPI00012066,IPI00470509,IPI00791223,IPI00796337                         | 38,204.50  | 320 | 330 | IANPVEGSTDR                 | K | Q | 1,158.58 |
| 994  | LMNA Isoform A of Lamin-A/C                                                  | IPI00021405,IPI00216952,IPI00216953,IPI00514204,IPI00644087,IPI00655812 | 74,122.60  | 320 | 329 | LRDLEDLAR                   | K | E | 1,187.64 |
| 995  | TUBB2C Tubulin beta-2C chain                                                 | IPI00007752                                                             | 49,812.70  | 321 | 336 | MSMKEVDEQMLNVQNK            | R | N | 1,923.90 |
| 996  | TUBB Tubulin beta chain                                                      | IPI00011654                                                             | 49,652.60  | 321 | 336 | MSMKEVDEQMLNVQNK            | R | N | 1,923.90 |
| 997  | G3BP1 Ras GTPase-activating protein-binding protein 1                        | IPI00012442                                                             | 52,144.80  | 321 | 331 | EAGEQGDIEPR                 | R | R | 1,200.55 |
| 998  | G3BP1 Ras GTPase-activating protein-binding protein 1                        | IPI00012442                                                             | 52,144.80  | 321 | 331 | EAGEQGDIEPR                 | R | R | 1,200.55 |
| 999  | TUBB2B Tubulin beta-2B chain                                                 | IPI00031370                                                             | 49,935.10  | 321 | 336 | MSMKEVDEQMLNVQNK            | R | N | 1,923.90 |
| 1000 | TUBA1A Tubulin alpha-1A chain                                                | IPI00180675                                                             | 50,117.70  | 321 | 326 | GDVVPK                      | R | D | 614.3509 |
| 1001 | CCT7 T-complex protein 1 subunit eta                                         | IPI00018465                                                             | 59,349.80  | 322 | 344 | TMMACGGSIQTSVNALSADV<br>LGR | R | C | 2,339.12 |
| 1002 | ACACA Isoform 1 of Acetyl-CoA carboxylase 1                                  | IPI00011569                                                             | 265,538.40 | 323 | 335 | KVNNADDFPNLFR               | R | Q | 1,549.78 |
| 1003 | ALDOA Fructose-bisphosphate aldolase A                                       | IPI00465439,IPI00796333                                                 | 39,402.60  | 323 | 331 | AAQEEYVKR                   | K | A | 1,093.56 |
| 1004 | CCT5 T-complex protein 1 subunit epsilon                                     | IPI00010720,IPI00910316                                                 | 59,654.30  | 324 | 340 | WVGGPEIELIAIATGGR           | R | I | 1,738.95 |
| 1005 | GAPDH Glyceraldehyde-3-phosphate dehydrogenase                               | IPI00219018,IPI00795257                                                 | 36,035.30  | 324 | 335 | VVDLMAHMASKE                | R | - | 1,330.65 |
| 1006 | TUBB2C Tubulin beta-2C chain                                                 | IPI00007752                                                             | 49,812.70  | 325 | 336 | EVDEQMLNVQNK                | K | N | 1,446.69 |
| 1007 | TUBB Tubulin beta chain                                                      | IPI00011654                                                             | 49,652.60  | 325 | 336 | EVDEQMLNVQNK                | K | N | 1,446.69 |
| 1008 | EIF4A1 Eukaryotic initiation factor 4A-I                                     | IPI00025491,IPI00871852                                                 | 46,137.30  | 325 | 334 | VLITDILLAR                  | R | G | 1,114.68 |
| 1009 | TUBB2B Tubulin beta-2B chain                                                 | IPI00031370                                                             | 49,935.10  | 325 | 336 | EVDEQMLNVQNK                | K | N | 1,446.69 |
| 1010 | NONO Non-POU domain-containing octamer-binding protein                       | IPI00304596                                                             | 54,213.60  | 325 | 337 | RMEELHNQEVQKR               | R | K | 1,696.85 |

|      |                                                                      |                                                                                                 |            |     |     |                        |   |   |          |
|------|----------------------------------------------------------------------|-------------------------------------------------------------------------------------------------|------------|-----|-----|------------------------|---|---|----------|
| 1011 | NONO Non-POU domain-containing octamer-binding protein               | IPI00304596                                                                                     | 54,213.60  | 325 | 336 | RMEELHNQEVQK           | R | R | 1,540.75 |
| 1012 | EFTUD2 116 kDa U5 small nuclear ribonucleoprotein component          | IPI00003519,IPI00917777                                                                         | 109,420.10 | 326 | 341 | IYADTFGDINYQEFAK       | K | R | 1,894.89 |
| 1013 | HSPA1A;HSPA1B Heat shock 70 kDa protein 1                            | IPI00304925                                                                                     | 70,036.00  | 326 | 342 | LDKAQIHLDLVLVGGSTR     | K | I | 1,822.02 |
| 1014 | TUBA1A Tubulin alpha-1A chain                                        | IPI00180675                                                                                     | 50,117.70  | 327 | 336 | DVNAAIATIK             | K | T | 1,015.58 |
| 1015 | PKM2 cDNA FLJ53368, highly similar to Pyruvate kinase isozymes M1/M2 | IPI00847989                                                                                     | 49,880.20  | 327 | 348 | LAPITSDPTEATAVGAVEASFK | R | C | 2,175.12 |
| 1016 | HSPA8 Isoform 1 of Heat shock cognate 71 kDa protein                 | IPI00003865                                                                                     | 70,881.80  | 329 | 342 | SQIHDIIVLVGGSTR        | K | I | 1,481.81 |
| 1017 | CKAP5 Isoform 1 of Cytoskeleton-associated protein 5                 | IPI00028275,IPI00472887                                                                         | 225,483.70 | 331 | 342 | DTNVMLVALAAK           | K | C | 1,245.69 |
| 1018 | CSE1L Isoform 1 of Exportin-2                                        | IPI00022744,IPI00219994                                                                         | 110,403.90 | 332 | 346 | NLFEDQNTLTSICEK        | K | V | 1,811.85 |
| 1019 | FKBP4 FK506-binding protein 4                                        | IPI00219005                                                                                     | 51,787.90  | 332 | 344 | LQAFSAAIESCNK          | K | A | 1,438.70 |
| 1020 | BAT3 Isoform 1 of Large proline-rich protein BAT3                    | IPI00465128,IPI00640922,IPI00641333,IPI00641784,IPI00642962,IPI00645431,IPI00894269,IPI00894467 | 119,389.30 | 332 | 344 | LLGNTFVALSDLR          | R | C | 1,418.80 |
| 1021 | ALDOA Fructose-bisphosphate aldolase A                               | IPI00465439,IPI00796333                                                                         | 39,402.60  | 332 | 342 | ALANSLACQ GK           | R | Y | 1,132.58 |
| 1022 | ALDOA Fructose-bisphosphate aldolase A                               | IPI00465439,IPI00796333                                                                         | 39,402.60  | 332 | 342 | ALANSLACQ GK           | R | Y | 1,132.58 |
| 1023 | RFC5 Replication factor C subunit 5                                  | IPI00031514,IPI00373883,IPI00908568                                                             | 38,480.40  | 334 | 340 | DLIVAEA                | R | - | 730.3982 |
| 1024 | YARS Tyrosyl-tRNA synthetase, cytoplasmic                            | IPI00007074                                                                                     | 59,127.10  | 336 | 346 | LASAAYDPDSK            | K | Q | 1,119.57 |
| 1025 | HNRNPA1 Isoform A1-B of Heterogeneous nuclear ribonucleoprotein A1   | IPI00215965,IPI00465365                                                                         | 38,828.10  | 337 | 352 | SSGPYGGGGQYFAKPR       | R | N | 1,628.78 |
| 1026 | PLS3 plastin 3                                                       | IPI00216694                                                                                     | 70,795.90  | 337 | 346 | AESMLQQADK             | R | L | 1,120.53 |
| 1027 | MTHFD1 C-1-tetrahydrofolate synthase, cytoplasmic                    | IPI00218342,IPI00794900                                                                         | 101,543.50 | 337 | 352 | EIGLLSEEVLYGETK        | R | A | 1,808.92 |
| 1028 | PTBP1 polypyrimidine tract-binding protein 1 isoform a               | IPI00183626,IPI00334175                                                                         | 59,616.40  | 338 | 365 | AIPSAAAAAAGRIAIPGLAG   | L | L | 2,402.35 |
| 1029 | HSP90AB1 Heat shock protein HSP 90-beta                              | IPI00414676                                                                                     | 83,249.30  | 338 | 348 | AGNSVL<br>RAPFDLFENKK  | R | K | 1,364.73 |
| 1030 | GNB2L1 38 kDa protein                                                | IPI00641950,IPI00848226                                                                         | 37,740.10  | 338 | 346 | VWQVTIGTR              | R | - | 1,059.59 |
| 1031 | COPG2 Coatomer subunit gamma-2                                       | IPI00002557                                                                                     | 97,606.50  | 339 | 350 | SIATLAITTLK            | R | T | 1,244.78 |
| 1032 | RRM2 Ribonucleoside-diphosphate reductase M2 subunit                 | IPI00011118                                                                                     | 51,076.50  | 339 | 348 | HLVHKPSEER             | K | V | 1,231.65 |
| 1033 | TBC1D4 TBC1D4 protein                                                | IPI00220901                                                                                     | 146,592.30 | 339 | 355 | HASAPSHVQPSDSEKNR      | R | T | 1,846.88 |
| 1034 | COPG Coatomer subunit gamma                                          | IPI00783982                                                                                     | 97,701.40  | 339 | 350 | SIATLAITTLK            | R | T | 1,244.78 |
| 1035 | RUVBL1 Isoform 1 of RuvB-like 1                                      | IPI00021187                                                                                     | 50,211.40  | 340 | 357 | GTEDITSPHGIPLDLLDR     | R | V | 1,949.00 |
| 1036 | TUBA1A Tubulin alpha-1A chain                                        | IPI00180675                                                                                     | 50,117.70  | 340 | 352 | TIQFVDWCPTGFK          | R | V | 1,598.77 |
| 1037 | COPB1 Coatomer subunit beta                                          | IPI00295851                                                                                     | 107,128.00 | 340 | 351 | TLQLALDLVSSR           | K | N | 1,315.76 |
| 1038 | TUBB2C Tubulin beta-2C chain                                         | IPI00007752                                                                                     | 49,812.70  | 341 | 361 | FVEWIPNNVKTAVCDIPPRGL  | Y | K | 2,425.27 |
| 1039 | TUBB Tubulin beta chain                                              | IPI00011654                                                                                     | 49,652.60  | 341 | 361 | FVEWIPNNVKTAVCDIPPRGL  | Y | K | 2,425.27 |
| 1040 | EEF1A1 Elongation factor 1-alpha 1                                   | IPI00396485                                                                                     | 50,123.20  | 341 | 357 | TAQVIILNHPGQISAGY      | F | A | 1,781.95 |
| 1041 | ENO1 Isoform alpha-enolase of Alpha-enolase                          | IPI00465248                                                                                     | 47,152.20  | 341 | 354 | LLKVNQIGSVTESL         | L | Q | 1,500.86 |
| 1042 | CKB Creatine kinase B-type                                           | IPI00022977,IPI00908811                                                                         | 42,627.10  | 342 | 358 | LGFSEVELVQMVVDGVK      | R | L | 1,848.98 |
| 1043 | PRPF6 Pre-mRNA-processing factor 6                                   | IPI00305068                                                                                     | 106,909.70 | 342 | 351 | SEDVWLEAAR             | K | L | 1,175.57 |
| 1044 | - 69 kDa protein                                                     | IPI00172590,IPI00658145                                                                         | 69,299.70  | 343 | 354 | DSALEFLTQLSR           | R | H | 1,379.72 |
| 1045 | ENO1 Isoform alpha-enolase of Alpha-enolase                          | IPI00465248                                                                                     | 47,152.20  | 344 | 358 | VNQIGSVTESLQACK        | K | L | 1,633.82 |
| 1046 | CCT7 T-complex protein 1 subunit eta                                 | IPI00018465                                                                                     | 59,349.80  | 345 | 357 | CQVFEETQIGGER          | R | Y | 1,552.71 |
| 1047 | ILF2 Interleukin enhancer-binding factor 2                           | IPI00005198                                                                                     | 43,044.70  | 347 | 358 | DGVIVTPSEKAY           | W | E | 1,278.66 |
| 1048 | PCBP2 poly(rC) binding protein 2 isoform b                           | IPI00012066,IPI00470509,IPI00791223,IPI00796337                                                 | 38,204.50  | 347 | 362 | LINVRLSSETGGMGSS       | Y | - | 1,607.81 |
| 1049 | PCBP2 poly(rC) binding protein 2 isoform b                           | IPI00012066,IPI00470509,IPI00791223,IPI00796337                                                 | 38,204.50  | 347 | 362 | LINVRLSSETGGMGSS       | Y | - | 1,607.81 |
| 1050 | HNRNPR Heterogeneous nuclear ribonucleoprotein R                     | IPI00012074,IPI00644055,IPI00856037,IPI00856038,IPI00910614                                     | 70,925.80  | 347 | 359 | NLATTVTEEILEK          | R | S | 1,460.78 |
| 1051 | ACSL3 Long-chain-fatty-acid--CoA ligase 3                            | IPI00031397                                                                                     | 80,405.10  | 349 | 363 | IGYSSPQTLDQSSK         | R | I | 1,581.78 |
| 1052 | NAMPT Isoform 1 of Nicotinamide phosphoribosyltransferase            | IPI00018873,IPI00472879                                                                         | 55,504.50  | 350 | 369 | VIQGDGVDINTLQEIVGMK    | R | Q | 2,158.11 |
| 1053 | TUBB2C Tubulin beta-2C chain                                         | IPI00007752                                                                                     | 49,812.70  | 351 | 359 | TAVCDIPPR              | K | G | 1,028.52 |
| 1054 | TUBB Tubulin beta chain                                              | IPI00011654                                                                                     | 49,652.60  | 351 | 359 | TAVCDIPPR              | K | G | 1,028.52 |

|      |                                                                               |                                                                                                                                                                                                    |            |     |     |                          |   |   |          |
|------|-------------------------------------------------------------------------------|----------------------------------------------------------------------------------------------------------------------------------------------------------------------------------------------------|------------|-----|-----|--------------------------|---|---|----------|
| 1055 | TUBB4 Tubulin beta-4 chain                                                    | UPI00023598                                                                                                                                                                                        | 49,567.40  | 351 | 359 | TAVCDIPPR                | K | G | 1,028.52 |
| 1056 | TUBB2B Tubulin beta-2B chain                                                  | UPI00031370                                                                                                                                                                                        | 49,935.10  | 351 | 359 | TAVCDIPPR                | K | G | 1,028.52 |
| 1057 | NCL cDNA FLJ45706 fis, clone FEBRA2028457, highly similar to Nucleolin        | UPI00444262,UPI00604620,UPI00827674                                                                                                                                                                | 65,945.80  | 351 | 360 | SISLYYTGEK               | R | G | 1,160.58 |
| 1058 | UBA1 Ubiquitin-like modifier-activating enzyme 1                              | UPI00645078                                                                                                                                                                                        | 117,832.30 | 351 | 368 | NEEDAAELVALAQAVNAR       | R | A | 1,883.95 |
| 1059 | STIP1 Stress-induced-phosphoprotein 1                                         | UPI00013894,UPI00871856                                                                                                                                                                            | 62,624.10  | 352 | 364 | LAYINPDLALEEK            | R | N | 1,488.79 |
| 1060 | PTBP1 polypyrimidine tract-binding protein 1 isoform a                        | UPI00183626,UPI00334175                                                                                                                                                                            | 59,616.40  | 352 | 374 | IAIPGLAGAGNSVLLVSNLNPE R | R | V | 2,275.28 |
| 1061 | CCT5 T-complex protein 1 subunit epsilon                                      | UPI00010720,UPI00910316                                                                                                                                                                            | 59,654.30  | 353 | 368 | LGFAGLVQEISFGTTK         | K | D | 1,667.90 |
| 1062 | ARMC6 Armadillo repeat-containing protein 6                                   | UPI00020196,UPI00470847,UPI00871811                                                                                                                                                                | 54,123.50  | 353 | 366 | AIAGNDDVKDAIVR           | R | A | 1,456.78 |
| 1063 | ATP2A2 Isoform SERCA2A of Sarcoplasmic/endoplasmic reticulum calcium ATPase 2 | UPI00177817,UPI00219078,UPI00747443,UPI00914019                                                                                                                                                    | 109,674.90 | 353 | 365 | TGTLTTNQMSVCR            | K | M | 1,468.69 |
| 1064 | TUBA1A Tubulin alpha-1A chain                                                 | UPI00180675                                                                                                                                                                                        | 50,117.70  | 353 | 370 | VGINYQPPTVVPGGDLAK       | K | V | 1,824.99 |
| 1065 | HNRNPA1 Isoform A1-B of Heterogeneous nuclear ribonucleoprotein A1            | UPI00215965,UPI00465365                                                                                                                                                                            | 38,828.10  | 353 | 370 | NQGGYGGSSSSSYGSGR        | R | R | 1,694.70 |
| 1066 | PSMD4 Isoform Rpn10A of 26S proteasome non-ATPase regulatory subunit 4        | UPI00022694,UPI00216247                                                                                                                                                                            | 40,719.20  | 354 | 365 | NAMGSLASQATK             | R | D | 1,178.58 |
| 1067 | PFKP 6-phosphofructokinase type C                                             | UPI00009790                                                                                                                                                                                        | 85,579.40  | 355 | 369 | LPLMECVQMTQDVQK          | R | A | 1,819.88 |
| 1068 | CSE1L Isoform 1 of Exportin-2                                                 | UPI00022744,UPI00219994                                                                                                                                                                            | 110,403.90 | 355 | 369 | RAADEEFEDNSEEY           | F | I | 1,774.70 |
| 1069 | HNRNPA3 Isoform 1 of Heterogeneous nuclear ribonucleoprotein A3               | UPI00419373                                                                                                                                                                                        | 39,577.10  | 355 | 376 | SSGSPYGGGYGSGGGSGGY R    | R | R | 1,910.79 |
| 1070 | HNRNPA3 Isoform 1 of Heterogeneous nuclear ribonucleoprotein A3               | UPI00419373                                                                                                                                                                                        | 39,577.10  | 355 | 376 | SSGSPYGGGYGSGGGSGGY R    | R | R | 1,910.79 |
| 1071 | BAT1 Isoform 2 of Spliceosome RNA helicase BAT1                               | UPI00641829,UPI00792043,UPI00848161,UPI00893580                                                                                                                                                    | 50,662.10  | 355 | 364 | ILVATNLFGR               | R | G | 1,103.66 |
| 1072 | PSMD3 26S proteasome non-ATPase regulatory subunit 3                          | UPI00011603                                                                                                                                                                                        | 60,961.60  | 356 | 368 | SLMPYFLLTQAVR            | R | T | 1,538.84 |
| 1073 | TCP1 T-complex protein 1 subunit alpha                                        | UPI00290566                                                                                                                                                                                        | 60,327.20  | 356 | 365 | ICDDELILIK               | R | N | 1,231.66 |
| 1074 | TKT transketolase isoform 2                                                   | UPI00792641                                                                                                                                                                                        | 58,965.00  | 356 | 373 | SVPTSTVFYPSDGVATEK       | R | A | 1,884.92 |
| 1075 | LAP3 Isoform 1 of Cytosol aminopeptidase                                      | UPI00419237,UPI00789806                                                                                                                                                                            | 56,149.70  | 357 | 368 | TIQVDNTDAEGR             | K | L | 1,318.62 |
| 1076 | PSMD2 26S proteasome non-ATPase regulatory subunit 2                          | UPI00012268                                                                                                                                                                                        | 100,184.20 | 358 | 369 | FGGSGSQVDSAR             | R | M | 1,167.54 |
| 1077 | CCT7 T-complex protein 1 subunit eta                                          | UPI00018465                                                                                                                                                                                        | 59,349.80  | 358 | 366 | YNFFTGCPK                | R | A | 1,133.51 |
| 1078 | EEF1A1 Elongation factor 1-alpha 1                                            | UPI00396485                                                                                                                                                                                        | 50,123.20  | 358 | 372 | APVLDCHTAHIACKF          | Y | A | 1,739.84 |
| 1079 | RRM2 Ribonucleoside-diphosphate reductase M2 subunit                          | UPI00011118                                                                                                                                                                                        | 51,076.50  | 359 | 371 | IEQFLTEALPVK             | R | L | 1,516.83 |
| 1080 | FKBP4 FK506-binding protein 4                                                 | UPI00219005                                                                                                                                                                                        | 51,787.90  | 359 | 373 | RGEAHLAVNDFELAR          | R | A | 1,697.87 |
| 1081 | ENO1 Isoform alpha-enolase of Alpha-enolase                                   | UPI00465248                                                                                                                                                                                        | 47,152.20  | 359 | 372 | LAQANGWGVMSHR            | K | S | 1,525.77 |
| 1082 | SPTBN1 Isoform Long of Spectrin beta chain, brain 1                           | UPI00005614,UPI00871932                                                                                                                                                                            | 274,595.40 | 360 | 372 | GNLEVLLFTIQSK            | K | M | 1,461.83 |
| 1083 | SAAL1 Similar to Protein SAAL1. Isoform 2                                     | UPI00304935                                                                                                                                                                                        | 53,637.60  | 360 | 369 | VLQNMEECQCK              | R | K | 1,277.60 |
| 1084 | TOP2A Isoform 3 of DNA topoisomerase 2-alpha                                  | UPI00218753,UPI00414101,UPI00478232,UPI00879004                                                                                                                                                    | 178,700.70 | 361 | 372 | HVDYVADQIVTK             | R | L | 1,387.72 |
| 1085 | TUBB2C Tubulin beta-2C chain                                                  | UPI00007752                                                                                                                                                                                        | 49,812.70  | 363 | 379 | MSATFIGNSTAIQELFK        | K | R | 1,873.94 |
| 1086 | TUBB Tubulin beta chain                                                       | UPI00011654                                                                                                                                                                                        | 49,652.60  | 363 | 380 | MAVTFIGNSTAIQELFKR       | K | I | 2,026.08 |
| 1087 | TUBB Tubulin beta chain                                                       | UPI00011654                                                                                                                                                                                        | 49,652.60  | 363 | 379 | MAVTFIGNSTAIQELFK        | K | R | 1,885.97 |
| 1088 | STAG3 Isoform 1 of Cohesin subunit SA-3                                       | UPI00018353,UPI00177925,UPI00216104,UPI00216704,UPI00237806,UPI00303402,UPI00384172,UPI00413244,UPI00456705,UPI00556151,UPI00783228,UPI00878533,UPI00914949,REV_1291,REV_22366,REV_27206,REV_43329 | 139,019.40 | 363 | 368 | CVKALK                   | K | G | 718.4281 |
| 1089 | TUBB4 Tubulin beta-4 chain                                                    | UPI00023598                                                                                                                                                                                        | 49,567.40  | 363 | 380 | MAATFIGNSTAIQELFKR       | K | I | 2,014.04 |
| 1090 | TUBB2B Tubulin beta-2B chain                                                  | UPI00031370                                                                                                                                                                                        | 49,935.10  | 363 | 379 | MSATFIGNSTAIQELFK        | K | R | 1,873.94 |
| 1091 | TBC1D4 TBC1D4 protein                                                         | UPI00220901                                                                                                                                                                                        | 146,592.30 | 364 | 374 | FEINLISPDTK              | R | S | 1,276.68 |
| 1092 | TKT transketolase isoform 2                                                   | UPI00792641                                                                                                                                                                                        | 58,965.00  | 364 | 377 | YPSDGVATEKAVEL           | F | A | 1,478.74 |
| 1093 | ATP6V1A V-type proton ATPase catalytic subunit A                              | UPI00007682                                                                                                                                                                                        | 68,287.40  | 365 | 381 | LAEMPADSGYPAYLGAR        | R | L | 1,781.85 |
| 1094 | SMC3 Structural maintenance of chromosomes protein 3                          | UPI00219420                                                                                                                                                                                        | 141,529.10 | 365 | 372 | LAQATQER                 | R | T | 916.4847 |
| 1095 | MTR Methionine synthase                                                       | UPI00743284                                                                                                                                                                                        | 140,514.40 | 365 | 377 | IGPYTNFVNIGER            | R | C | 1,479.76 |

|      |                                                                        |                                                             |            |     |     |                                |   |   |          |
|------|------------------------------------------------------------------------|-------------------------------------------------------------|------------|-----|-----|--------------------------------|---|---|----------|
| 1096 | SFPQ Isoform Long of Splicing factor, proline- and glutamine-rich      | IPI00010740                                                 | 76,131.50  | 366 | 376 | FATHAAALSVR                    | R | N | 1,143.63 |
| 1097 | TARS Threonyl-tRNA synthetase, cytoplasmic                             | IPI00329633                                                 | 83,419.80  | 368 | 381 | GFQEVVTPNIFNSR                 | R | L | 1,607.82 |
| 1098 | PC Pyruvate carboxylase, mitochondrial                                 | IPI00299402                                                 | 129,616.70 | 369 | 377 | INGCAIQCR                      | R | V | 1,091.51 |
| 1099 | UBA1 Ubiquitin-like modifier-activating enzyme 1                       | IPI00645078                                                 | 117,832.30 | 369 | 384 | ALPAVQQNNLDEDLIR               | R | K | 1,808.95 |
| 1100 | XPOT Exportin-T                                                        | IPI00306290                                                 | 109,948.60 | 370 | 381 | ANVEAIMLAVMK                   | K | K | 1,289.70 |
| 1101 | G3BP2 Isoform A of Ras GTPase-activating protein-binding protein 2     | IPI00009057,IPI00179890                                     | 54,102.30  | 371 | 387 | LPNFGFVVFDSEPVQR               | K | I | 1,965.97 |
| 1102 | FASN Fatty acid synthase                                               | IPI00026781                                                 | 273,382.00 | 371 | 393 | DGRLQVVDQPLPVRGGNVGI<br>NSF    | L | G | 2,437.29 |
| 1103 | CSE1L Isoform 1 of Exportin-2                                          | IPI00022744,IPI00219994                                     | 110,403.90 | 373 | 382 | DLEGSIDTR                      | R | R | 1,120.51 |
| 1104 | FASN Fatty acid synthase                                               | IPI00026781                                                 | 273,382.00 | 374 | 384 | LQVVDQPLPVR                    | R | G | 1,263.74 |
| 1105 | FASN Fatty acid synthase                                               | IPI00026781                                                 | 273,382.00 | 374 | 384 | LQVVDQPLPVR                    | R | G | 1,263.74 |
| 1106 | TUBA1A Tubulin alpha-1A chain                                          | IPI00180675                                                 | 50,117.70  | 374 | 390 | AVCMLSNTTAIAEAWAR              | R | L | 1,864.90 |
| 1107 | TKT transketolase isoform 2                                            | IPI00792641                                                 | 58,965.00  | 374 | 382 | AVEAANTK                       | K | G | 916.5098 |
| 1108 | RCC1 regulator of chromosome condensation 1 isoform a                  | IPI00001661,IPI00747309,IPI00787306                         | 48,126.30  | 375 | 393 | LPAVSSVACGASVGYAVTK            | R | D | 1,836.95 |
| 1109 | MARS Methionyl-tRNA synthetase, cytoplasmic                            | IPI00008240                                                 | 101,099.50 | 377 | 388 | GFVLQDTVEQLR                   | R | C | 1,404.75 |
| 1110 | G3BP1 Ras GTPase-activating protein-binding protein 1                  | IPI00012442                                                 | 52,144.80  | 377 | 393 | LPNFGFVVFDSEPVQK               | K | V | 1,937.96 |
| 1111 | ACTN1 Alpha-actinin-1                                                  | IPI00013508,IPI00759776,IPI00909239                         | 103,043.00 | 377 | 387 | GYEEWLLNEIR                    | K | R | 1,421.71 |
| 1112 | EIF3A Eukaryotic translation initiation factor 3 subunit A             | IPI00029012                                                 | 166,556.90 | 377 | 388 | FNVLQYVVPEVK                   | R | D | 1,434.80 |
| 1113 | CCT3 chaperonin containing TCP1, subunit 3 isoform b                   | IPI00290770,IPI00553185                                     | 60,446.30  | 377 | 388 | GASKEILSEVER                   | R | N | 1,317.70 |
| 1114 | HSP90AB1 Heat shock protein HSP 90-beta                                | IPI00414676                                                 | 83,249.30  | 377 | 388 | IRGVVDSIDLPL                   | F | N | 1,312.71 |
| 1115 | HNRNPK Isoform 1 of Heterogeneous nuclear ribonucleoprotein K          | IPI00216049,IPI00216746,IPI00514561,IPI00807545,IPI00910458 | 50,960.50  | 378 | 396 | GSYDGLGGPIITQVTIPK             | R | D | 1,917.03 |
| 1116 | FKBP4 FK506-binding protein 4                                          | IPI00219005                                                 | 51,787.90  | 379 | 387 | VLQLYPNNK                      | K | A | 1,088.61 |
| 1117 | HSP90AB1 Heat shock protein HSP 90-beta                                | IPI00414676                                                 | 83,249.30  | 379 | 392 | GVVDSIDLPLNISR                 | R | E | 1,513.79 |
| 1118 | EFTUD2 116 kDa U5 small nuclear ribonucleoprotein component            | IPI00003519,IPI00917777                                     | 109,420.10 | 380 | 394 | ILAQVVGVDVDTSLPR               | K | T | 1,582.88 |
| 1119 | NCL cDNA FLJ45706 fis, clone FEBRA2028457, highly similar to Nucleolin | IPI00444262,IPI00604620,IPI00827674                         | 65,945.80  | 380 | 401 | TLVLSNLSYSATEETLQEVFE<br>K     | K | A | 2,501.27 |
| 1120 | TUBB2C Tubulin beta-2C chain                                           | IPI00007752                                                 | 49,812.70  | 381 | 390 | ISEQFTAMFR                     | R | R | 1,245.59 |
| 1121 | TUBB Tubulin beta chain                                                | IPI00011654                                                 | 49,652.60  | 381 | 390 | ISEQFTAMFR                     | R | R | 1,229.60 |
| 1122 | TUBB Tubulin beta chain                                                | IPI00011654                                                 | 49,652.60  | 381 | 390 | ISEQFTAMFR                     | R | R | 1,229.60 |
| 1123 | TUBB Tubulin beta chain                                                | IPI00011654                                                 | 49,652.60  | 381 | 390 | ISEQFTAMFR                     | R | R | 1,245.59 |
| 1124 | TUBB4 Tubulin beta-4 chain                                             | IPI00023598                                                 | 49,567.40  | 381 | 390 | ISEQFTAMFR                     | R | R | 1,245.59 |
| 1125 | TUBB2B Tubulin beta-2B chain                                           | IPI00031370                                                 | 49,935.10  | 381 | 390 | ISEQFTAMFR                     | R | R | 1,245.59 |
| 1126 | ATP6V1A V-type proton ATPase catalytic subunit A                       | IPI00007682                                                 | 68,287.40  | 382 | 388 | LASFYER                        | R | A | 885.4464 |
| 1127 | SPTAN1 cDNA FLJ61399, highly similar to Spectrin alpha chain, brain    | IPI00744706,IPI00843765,IPI00844215,IPI00871535,IPI00879810 | 282,131.80 | 382 | 402 | ALINADELASDVAGAEALLDR          | K | H | 2,127.09 |
| 1128 | COPA Isoform 1 of Coatomer subunit alpha                               | IPI00295857,IPI00646493                                     | 138,331.30 | 383 | 398 | ASNLENSTYDLYTIPK               | R | D | 1,828.90 |
| 1129 | HNRNPA2B1 43 kDa protein                                               | IPI00874030                                                 | 43,234.30  | 383 | 408 | GGSRNMGGPYGGGNYGPG<br>GSGGSGGY | F | G | 2,276.94 |
| 1130 | IRS4 Insulin receptor substrate 4                                      | IPI00020729                                                 | 133,751.30 | 385 | 397 | AIGDGEDEMLFTR                  | R | R | 1,453.66 |
| 1131 | PFKP 6-phosphofructokinase type C                                      | IPI00009790                                                 | 85,579.40  | 386 | 396 | SFAGNLNTYKR                    | R | L | 1,270.65 |
| 1132 | TFRC Transferrin receptor protein 1                                    | IPI00022462                                                 | 84,855.60  | 386 | 394 | ILNIFGVK                       | K | G | 1,016.65 |
| 1133 | UBA1 Ubiquitin-like modifier-activating enzyme 1                       | IPI00645078                                                 | 117,832.30 | 386 | 411 | LAYVAAGDLAPINAFIGGLAAQ<br>EVMK | K | A | 2,619.39 |
| 1134 | HNRNPA2B1 43 kDa protein                                               | IPI00874030                                                 | 43,234.30  | 387 | 411 | NMGGPYGGGNYGPGGSGG<br>SGGYGGR  | R | S | 2,189.91 |
| 1135 | IQGAP1 Ras GTPase-activating-like protein IQGAP1                       | IPI00009342                                                 | 189,240.60 | 389 | 401 | LAVALINAAIQK                   | R | G | 1,295.80 |
| 1136 | TUBA1A Tubulin alpha-1A chain                                          | IPI00180675                                                 | 50,117.70  | 391 | 401 | LDHKFDLMYAK                    | R | R | 1,380.70 |
| 1137 | PDS5A Isoform 2 of Sister chromatid cohesion protein PDS5 homolog A    | IPI00303063,IPI00854642                                     | 150,817.50 | 391 | 404 | DLALVNDQLLGFVR                 | R | E | 1,572.87 |

|      |                                                                                           |                                                                         |            |     |     |                            |   |   |          |
|------|-------------------------------------------------------------------------------------------|-------------------------------------------------------------------------|------------|-----|-----|----------------------------|---|---|----------|
| 1138 | DDX5 Probable ATP-dependent RNA helicase DDX5                                             | IPI00017617                                                             | 69,131.70  | 392 | 403 | APILIATDVASR               | K | G | 1,226.71 |
| 1139 | DDX5 Probable ATP-dependent RNA helicase DDX5                                             | IPI00017617                                                             | 69,131.70  | 392 | 403 | APILIATDVASR               | K | G | 1,226.71 |
| 1140 | CCT4 T-complex protein 1 subunit delta                                                    | IPI00302927,IPI00873222,IPI00893358                                     | 57,907.90  | 392 | 403 | GSNKLVIEEAER               | R | S | 1,344.71 |
| 1141 | NAMPT Isoform 1 of Nicotinamide phosphoribosyltransferase                                 | IPI00018873,IPI00472879                                                 | 55,504.50  | 393 | 400 | DLLNCSFK                   | R | C | 996.482  |
| 1142 | HSP90AB1 Heat shock protein HSP 90-beta                                                   | IPI00414676                                                             | 83,249.30  | 393 | 399 | EMLQQSK                    | R | I | 863.4292 |
| 1143 | HNRNPA2B1 43 kDa protein                                                                  | IPI00874030                                                             | 43,234.30  | 393 | 408 | GGGNYGPGGSGGSGGY           | Y | G | 1,300.52 |
| 1144 | GDI2 cDNA FLJ60299, highly similar to Rab GDP dissociation inhibitor beta                 | IPI00031461                                                             | 51,138.50  | 395 | 406 | DLGTESQIFISR               | K | T | 1,365.70 |
| 1145 | PFAS Phosphoribosylformylglycinamide synthase                                             | IPI00004534                                                             | 144,645.60 | 396 | 406 | FGPEVLAGFAR                | K | S | 1,163.62 |
| 1146 | ACTN4 Alpha-actinin-4                                                                     | IPI00013808                                                             | 104,839.20 | 396 | 406 | GYEEWLLNEIR                | K | R | 1,421.71 |
| 1147 | ACSL3 Long-chain-fatty-acid--CoA ligase 3                                                 | IPI00031397                                                             | 80,405.10  | 398 | 406 | VSEMSFQR                   | K | N | 1,070.49 |
| 1148 | EEF2 Elongation factor 2                                                                  | IPI00186290                                                             | 95,322.10  | 398 | 411 | ISKMVPTSDKGRFY             | Y | A | 1,628.85 |
| 1149 | DIS3 Isoform 1 of Exosome complex exonuclease RRP44                                       | IPI00746351                                                             | 108,987.70 | 398 | 407 | IIVAIIDGWPR                | R | N | 1,139.66 |
| 1150 | COPA Isoform 1 of Coatomer subunit alpha                                                  | IPI00295857,IPI00646493                                                 | 138,331.30 | 399 | 412 | DADSQNPDAPEGKR             | K | S | 1,499.67 |
| 1151 | BAT1 Isoform 2 of Spliceosome RNA helicase BAT1                                           | IPI00641829,IPI00792043,IPI00848161,IPI00893580                         | 50,662.10  | 400 | 413 | GLAITFVSDENDAK             | K | I | 1,479.73 |
| 1152 | IPO4 Isoform 1 of Importin-4                                                              | IPI00156374,IPI00398009                                                 | 118,700.70 | 402 | 411 | GLEDPQSQVVR                | K | N | 1,099.57 |
| 1153 | PRIM2 Isoform 1 of DNA primase large subunit                                              | IPI00027705                                                             | 58,791.20  | 403 | 416 | ISPGGISQILDLVK             | K | G | 1,439.85 |
| 1154 | DDX5 Probable ATP-dependent RNA helicase DDX5                                             | IPI00017617                                                             | 69,131.70  | 404 | 411 | GLDVEDVK                   | R | F | 874.4518 |
| 1155 | HSP90AA1 heat shock protein 90kDa alpha (cytosolic), class A member 1 isoform 1           | IPI00382470,IPI00784295                                                 | 98,147.10  | 404 | 414 | EKYIDQEELNK                | K | T | 1,408.70 |
| 1156 | ETF1 Eukaryotic peptide chain release factor subunit 1                                    | IPI00429191                                                             | 49,014.60  | 405 | 414 | GFGGIGGILR                 | K | Y | 946.5471 |
| 1157 | EIF4G2 cDNA FLJ59571, highly similar to Eukaryotic translation initiation factor 4gamma 2 | IPI00015952,IPI00782985                                                 | 110,247.70 | 406 | 420 | DLGVFIPAPMAQGM             | K | S | 1,602.81 |
| 1158 | HSP90AA1 heat shock protein 90kDa alpha (cytosolic), class A member 1 isoform 1           | IPI00382470,IPI00784295                                                 | 98,147.10  | 406 | 414 | YIDQEELNK                  | K | T | 1,151.56 |
| 1159 | ARMC6 Armadillo repeat-containing protein 6                                               | IPI00020196,IPI00470847,IPI00871811                                     | 54,123.50  | 407 | 422 | IIVEGGGAVALQAMK            | R | A | 1,527.86 |
| 1160 | DNM1L Isoform 5 of Dynamin-1-like protein                                                 | IPI00037283,IPI00146935,IPI00235412,IPI00473085,IPI00555883,IPI00871742 | 85,362.60  | 407 | 418 | YIETSELGGAR                | K | I | 1,355.63 |
| 1161 | PGK1 Phosphoglycerate kinase 1                                                            | IPI00169383                                                             | 44,597.30  | 407 | 417 | VLPQVDALSNI                | K | - | 1,097.62 |
| 1162 | PC Pyruvate carboxylase, mitochondrial                                                    | IPI00299402                                                             | 129,616.70 | 407 | 428 | LDNASAFQGAIVSPHYDSSLV<br>K | R | V | 2,345.21 |
| 1163 | MYH9 Isoform 1 of Myosin-9                                                                | IPI00019502                                                             | 226,519.50 | 408 | 419 | EQADFAIEALAK               | K | A | 1,305.67 |
| 1164 | PRPF6 Pre-mRNA-processing factor 6                                                        | IPI00305068                                                             | 106,909.70 | 409 | 420 | AAVELEPEDAR                | K | I | 1,328.63 |
| 1165 | FKBP4 FK506-binding protein 4                                                             | IPI00219005                                                             | 51,787.90  | 410 | 417 | LYANMFER                   | K | L | 1,043.50 |
| 1166 | ENO1 Isoform alpha-enolase of Alpha-enolase                                               | IPI00465248                                                             | 47,152.20  | 412 | 423 | RIEEELGSKAKF               | L | A | 1,406.76 |
| 1167 | MSN Moesin                                                                                | IPI00219365,IPI00872814                                                 | 67,803.80  | 413 | 427 | TQEQLALEMAELTAR            | K | I | 1,703.86 |
| 1168 | COPA Isoform 1 of Coatomer subunit alpha                                                  | IPI00295857,IPI00646493                                                 | 138,331.30 | 413 | 423 | SSGLTAVWVAR                | R | N | 1,146.63 |
| 1169 | EEF2 Elongation factor 2                                                                  | IPI00186290                                                             | 95,322.10  | 416 | 426 | VFSGLVSTGLK                | R | V | 1,107.64 |
| 1170 | EEF2 Elongation factor 2                                                                  | IPI00186290                                                             | 95,322.10  | 416 | 426 | VFSGLVSTGLK                | R | V | 1,107.64 |
| 1171 | CSE1L Isoform 1 of Exportin-2                                                             | IPI00022744,IPI00219994                                                 | 110,403.90 | 417 | 424 | AKNPSVNW                   | Y | K | 915.4682 |
| 1172 | CDC7 Cell division cycle 7-related protein kinase                                         | IPI00448121                                                             | 63,871.70  | 417 | 431 | ASDDLTLAQIMTIR             | K | G | 1,618.85 |
| 1173 | DHX9 ATP-dependent RNA helicase A                                                         | IPI00844578                                                             | 140,943.50 | 418 | 434 | TTQVPQFILDDFIQNDR          | K | A | 2,050.02 |
| 1174 | HSP90AA1 heat shock protein 90kDa alpha (cytosolic), class A member 1 isoform 1           | IPI00382470,IPI00784295                                                 | 98,147.10  | 420 | 435 | TRNPDDITNEEYGEFY           | W | K | 1,962.84 |
| 1175 | RARS Isoform Complexed of Arginyl-tRNA synthetase, cytoplasmic                            | IPI00004860                                                             | 75,364.00  | 421 | 437 | AAAQMIGWYDPKVTRVF          | F | H | 1,953.01 |
| 1176 | FANCI Isoform 3 of Fanconi anemia group I protein                                         | IPI00306518                                                             | 149,310.90 | 421 | 431 | LGANILLETFK                | K | I | 1,218.71 |
| 1177 | HSPD1 60 kDa heat shock protein, mitochondrial                                            | IPI00784154                                                             | 61,037.70  | 421 | 429 | VTDALNATR                  | R | A | 960.5109 |
| 1178 | HSP90AA1 heat shock protein 90kDa alpha (cytosolic), class A member 1 isoform 1           | IPI00382470,IPI00784295                                                 | 98,147.10  | 422 | 436 | NPDDITNEEYGEFYK            | R | S | 1,833.78 |
| 1179 | IARS Isoleucyl-tRNA synthetase, cytoplasmic                                               | IPI00644127,IPI00877938                                                 | 144,944.40 | 423 | 432 | VENMVDQLLR                 | R | N | 1,216.64 |

|      |                                                                                                           |                                                             |            |     |     |                            |   |   |          |
|------|-----------------------------------------------------------------------------------------------------------|-------------------------------------------------------------|------------|-----|-----|----------------------------|---|---|----------|
| 1180 | PSMD3 26S proteasome non-ATPase regulatory subunit 3                                                      | IPI00011603                                                 | 60,961.60  | 426 | 440 | LQLDSPEDAEIFIVAK           | K | A | 1,674.86 |
| 1181 | CCT7 T-complex protein 1 subunit eta                                                                      | IPI00018465                                                 | 59,349.80  | 426 | 440 | TIPGKQQLLIGAYAK            | R | A | 1,600.94 |
| 1182 | CSE1L Isoform 1 of Exportin-2                                                                             | IPI00022744,IPI00219994                                     | 110,403.90 | 426 | 440 | HKDAAIYLVTSLSASK           | K | A | 1,616.90 |
| 1183 | NUP107 Nuclear pore complex protein Nup107                                                                | IPI00028005                                                 | 106,358.70 | 426 | 436 | AIYAALSGNLK                | R | Q | 1,120.64 |
| 1184 | FKBP4 FK506-binding protein 4                                                                             | IPI00219005                                                 | 51,787.90  | 427 | 445 | AEASSGDHPTDTEMKEEQK        | K | S | 2,089.90 |
| 1185 | ATIC Bifunctional purine biosynthesis protein PURH                                                        | IPI00289499                                                 | 64,598.50  | 427 | 437 | YTQNSVVCYAK                | K | N | 1,320.59 |
| 1186 | CCT3 chaperonin containing TCP1, subunit 3 isoform b                                                      | IPI00290770,IPI00553185                                     | 60,446.30  | 427 | 437 | AMTGVQWQWYR                | K | A | 1,337.63 |
| 1187 | CSE1L Isoform 1 of Exportin-2                                                                             | IPI00022744,IPI00219994                                     | 110,403.90 | 428 | 440 | DAAIYLVTSLSASK             | K | A | 1,351.75 |
| 1188 | GDI2 cDNA FLJ60299, highly similar to Rab GDP dissociation inhibitor beta                                 | IPI00031461                                                 | 51,138.50  | 428 | 440 | MTGSEFDFEEMKR              | R | K | 1,606.69 |
| 1189 | TFRC Transferrin receptor protein 1                                                                       | IPI00022462                                                 | 84,855.60  | 429 | 439 | LAQMFSDMVLK                | K | D | 1,282.65 |
| 1190 | TFRC Transferrin receptor protein 1                                                                       | IPI00022462                                                 | 84,855.60  | 429 | 439 | LAQMFSDMVLK                | K | D | 1,282.65 |
| 1191 | HSPD1 60 kDa heat shock protein, mitochondrial                                                            | IPI00784154                                                 | 61,037.70  | 430 | 446 | AAVEEGIVLGGGCALLR          | R | C | 1,684.91 |
| 1192 | NAT10 N-acetyltransferase 10                                                                              | IPI00300127                                                 | 115,690.20 | 433 | 447 | QQSAQSQVSTTAENK            | R | T | 1,606.77 |
| 1193 | STIP1 Stress-induced-phosphoprotein 1                                                                     | IPI00013894,IPI00871856                                     | 62,624.10  | 434 | 446 | KAAALEAMKDYTK              | R | A | 1,439.76 |
| 1194 | AMOT Isoform 1 of Angiomotin                                                                              | IPI00163085,IPI00642249,IPI00644547                         | 118,066.40 | 434 | 446 | AQQMVEILSDENR              | R | N | 1,532.74 |
| 1195 | TARS Threonyl-tRNA synthetase, cytoplasmic                                                                | IPI00329633                                                 | 83,419.80  | 434 | 442 | LADFGVLHR                  | R | N | 1,027.57 |
| 1196 | PFKP 6-phosphofructokinase type C                                                                         | IPI00009790                                                 | 85,579.40  | 435 | 442 | VGIADGHR                   | R | M | 824.4374 |
| 1197 | NONO Non-POU domain-containing octamer-binding protein                                                    | IPI00304596                                                 | 54,213.60  | 435 | 456 | FGQAATMEGIGAIGGTPPAFN R    | R | A | 2,163.07 |
| 1198 | DHX9 ATP-dependent RNA helicase A                                                                         | IPI00844578                                                 | 140,943.50 | 435 | 446 | AAECNIVVTQPR               | R | R | 1,357.69 |
| 1199 | ATP2A2 Isoform SERCA2A of Sarcoplasmic/endoplasmic reticulum calcium ATPase 2                             | IPI00177817,IPI00219078,IPI00747443,IPI00914019             | 109,674.90 | 437 | 451 | VGEATETALTCLVEK            | K | M | 1,620.82 |
| 1200 | HSP90AA1 heat shock protein 90kDa alpha (cytosolic), class A member 1 isoform 1                           | IPI00382470,IPI00784295                                     | 98,147.10  | 437 | 449 | SLTNDWEDHLAVK              | K | H | 1,527.74 |
| 1201 | RAD21 Double-strand-break repair protein rad21 homolog                                                    | IPI00006715                                                 | 71,673.60  | 438 | 450 | DVIDEPIIEECSR              | R | L | 1,511.76 |
| 1202 | ATIC Bifunctional purine biosynthesis protein PURH                                                        | IPI00289499                                                 | 64,598.50  | 438 | 451 | NGQVIGIGAGQQSR             | K | I | 1,384.73 |
| 1203 | CCT3 chaperonin containing TCP1, subunit 3 isoform b                                                      | IPI00290770,IPI00553185                                     | 60,446.30  | 438 | 448 | AVAQALEVIPR                | R | T | 1,166.69 |
| 1204 | CCT3 chaperonin containing TCP1, subunit 3 isoform b                                                      | IPI00290770,IPI00553185                                     | 60,446.30  | 438 | 448 | AVAQALEVIPR                | R | T | 1,166.69 |
| 1205 | HNRNPU cDNA FLJ44920 fis, clone BRAMY3011501, highly similar to Heterogeneous nuclear ribonucleoprotein U | IPI00640106,IPI00644079                                     | 83,067.80  | 439 | 450 | VTKHAAENPGKY               | W | N | 1,314.68 |
| 1206 | CCT8 59 kDa protein                                                                                       | IPI00302925,IPI00784090                                     | 59,460.90  | 440 | 449 | FAEAFEAIR                  | K | A | 1,150.59 |
| 1207 | PSMD3 26S proteasome non-ATPase regulatory subunit 3                                                      | IPI00011603                                                 | 60,961.60  | 441 | 455 | AIRDGVIASINHEK             | K | G | 1,651.88 |
| 1208 | HNRNPU cDNA FLJ44920 fis, clone BRAMY3011501, highly similar to Heterogeneous nuclear ribonucleoprotein U | IPI00640106,IPI00644079                                     | 83,067.80  | 442 | 461 | HAAENPGKYNILGTNTIMDK       | K | M | 2,187.09 |
| 1209 | SPTAN1 cDNA FLJ61399, highly similar to Spectrin alpha chain, brain                                       | IPI00744706,IPI00843765,IPI00844215,IPI00871535,IPI00879810 | 282,131.80 | 442 | 449 | LTVLSEER                   | K | A | 946.5204 |
| 1210 | KPNA6 cDNA FLJ53229, highly similar to Importin alpha-7 subunit                                           | IPI00747764                                                 | 60,563.50  | 442 | 455 | IVQVALNGLLENILR            | K | L | 1,551.92 |
| 1211 | PFKP 6-phosphofructokinase type C                                                                         | IPI00009790                                                 | 85,579.40  | 443 | 455 | MLAIYDGFDFGFAK             | R | G | 1,447.69 |
| 1212 | TARS Threonyl-tRNA synthetase, cytoplasmic                                                                | IPI00329633                                                 | 83,419.80  | 443 | 454 | NELSGALTGLTR               | R | V | 1,231.66 |
| 1213 | SPTBN1 Isoform Long of Spectrin beta chain, brain 1                                                       | IPI00005614,IPI00871932                                     | 274,595.40 | 444 | 462 | LVSQDNFGFDLPAVEAATK        | R | K | 2,022.02 |
| 1214 | TCP1 T-complex protein 1 subunit alpha                                                                    | IPI00290566                                                 | 60,327.20  | 444 | 466 | SLLVIPNTLAVNAAQDSTDLVA R K | R | L | 2,353.30 |
| 1215 | ZNF326 Isoform 1 of Zinc finger protein 326                                                               | IPI00373877,IPI00872597                                     | 65,635.50  | 444 | 459 | ESVLTATSILNNPIVK           | R | A | 1,698.96 |
| 1216 | PTBP1 polypyrimidine tract-binding protein 1 isoform a                                                    | IPI00183626,IPI00334175                                     | 59,616.40  | 445 | 463 | EGQEDQGLTKDYGNSPLHR        | R | F | 2,144.00 |



|      |                                                                                 |                                                                         |            |     |     |                               |   |   |          |
|------|---------------------------------------------------------------------------------|-------------------------------------------------------------------------|------------|-----|-----|-------------------------------|---|---|----------|
| 1217 | ATP1A1 Isoform Long of Sodium/potassium-transporting ATPase subunit alpha-1     | IPI00006482,IPI00646182                                                 | 112,881.50 | 446 | 458 | AVAGDASESALLK                 | R | C | 1,231.65 |
| 1218 | ATP1A1 Isoform Long of Sodium/potassium-transporting ATPase subunit alpha-1     | IPI00006482,IPI00646182                                                 | 112,881.50 | 446 | 458 | AVAGDASESALLK                 | R | C | 1,231.65 |
| 1219 | FKBP4 FK506-binding protein 4                                                   | IPI00219005                                                             | 51,787.90  | 446 | 459 | SNTAGSQSQVETEA                | K | - | 1,408.62 |
| 1220 | ACSL3 Long-chain-fatty-acid--CoA ligase 3                                       | IPI00031397                                                             | 80,405.10  | 447 | 461 | LLLCGGAPLSATTQR               | R | F | 1,557.84 |
| 1221 | TCP1 T-complex protein 1 subunit alpha                                          | IPI00290566                                                             | 60,327.20  | 447 | 467 | VIPNTLAVNAAQDSTDLVAKL         | L | R | 2,153.18 |
| 1222 | CCT7 T-complex protein 1 subunit eta                                            | IPI00018465                                                             | 59,349.80  | 448 | 463 | QLCDNAGFDATNILNK              | R | L | 1,793.85 |
| 1223 | COPA Isoform 1 of Coatomer subunit alpha                                        | IPI00295857,IPI00646493                                                 | 138,331.30 | 448 | 467 | VQVPCNCEIFYAGTGNNLLR          | K | D | 2,279.15 |
| 1224 | TKT transketolase isoform 2                                                     | IPI00792641                                                             | 58,965.00  | 448 | 459 | VLDPFTIKPLDR                  | R | K | 1,413.81 |
| 1225 | CCT3 chaperonin containing TCP1, subunit 3 isoform b                            | IPI00290770,IPI00553185                                                 | 60,446.30  | 449 | 460 | TLIQNCGASTIR                  | R | L | 1,333.69 |
| 1226 | EEF1D Elongation factor 1-delta                                                 | IPI00023048,IPI00064086,IPI00642971,IPI00789435                         | 71,390.30  | 450 | 461 | IASLEVENQSLR                  | R | G | 1,358.73 |
| 1227 | CNOT1 Isoform 1 of CCR4-NOT transcription complex subunit 1                     | IPI00166010,IPI00880052                                                 | 266,926.70 | 450 | 459 | SLDLIESLLR                    | K | L | 1,158.67 |
| 1228 | CCT3 chaperonin containing TCP1, subunit 3 isoform b                            | IPI00290770,IPI00553185                                                 | 60,446.30  | 451 | 462 | IQNCGASTIRLL                  | L | T | 1,345.73 |
| 1229 | POLD1 DNA polymerase delta catalytic subunit                                    | IPI00002894,IPI00556021,IPI00655631                                     | 123,615.50 | 455 | 465 | VQMDMLQVLLR                   | R | E | 1,345.73 |
| 1230 | CKAP5 Isoform 1 of Cytoskeleton-associated protein 5                            | IPI00028275,IPI00472887                                                 | 225,483.70 | 457 | 468 | DAAFEALGTALK                  | R | V | 1,206.64 |
| 1231 | EEF2 Elongation factor 2                                                        | IPI00186290                                                             | 95,322.10  | 457 | 481 | YVEPIEDVPCGNIVGLVGVDQ<br>FLVK | R | T | 2,759.43 |
| 1232 | HSP90AB1 Heat shock protein HSP 90-beta                                         | IPI00414676                                                             | 83,249.30  | 457 | 475 | YHTSQSGDEMTSLSEYVSR           | R | M | 2,176.95 |
| 1233 | IPO4 Isoform 1 of Importin-4                                                    | IPI00156374,IPI00398009                                                 | 118,700.70 | 458 | 472 | ACYALENFVENLGPK               | K | V | 1,724.83 |
| 1234 | EEF2 Elongation factor 2                                                        | IPI00186290                                                             | 95,322.10  | 458 | 478 | VEPIEDVPCGNIVGLVGVDQF         | Y | L | 2,256.12 |
| 1235 | SLC2A1 Solute carrier family 2, facilitated glucose transporter member 1        | IPI00220194,IPI00872375,IPI00909237                                     | 54,067.30  | 459 | 468 | TFDEIASGFR                    | R | Q | 1,142.55 |
| 1236 | PFKP 6-phosphofructokinase type C                                               | IPI00009790                                                             | 85,579.40  | 460 | 480 | EIGWTDVGGWTGQGGGSILGT<br>K    | K | R | 2,119.05 |
| 1237 | DDX5 Probable ATP-dependent RNA helicase DDX5                                   | IPI00017617                                                             | 69,131.70  | 461 | 472 | REANQAINPKLL                  | L | Q | 1,366.78 |
| 1238 | ILF3 Isoform 5 of Interleukin enhancer-binding factor 3                         | IPI00219330,IPI00298788,IPI00298789,IPI00414335,IPI00418313,IPI00556173 | 74,589.90  | 461 | 474 | VLQDMGLPTGAEGR                | K | D | 1,443.73 |
| 1239 | ILF3 Isoform 5 of Interleukin enhancer-binding factor 3                         | IPI00219330,IPI00298788,IPI00298789,IPI00414335,IPI00418313,IPI00556173 | 74,589.90  | 461 | 474 | VLQDMGLPTGAEGR                | K | D | 1,443.73 |
| 1240 | EEF1D Elongation factor 1-delta                                                 | IPI00023048,IPI00064086,IPI00642971,IPI00789435                         | 71,390.30  | 462 | 473 | GVVQELQQAISK                  | R | L | 1,299.73 |
| 1241 | GATAD2A Isoform 1 of Transcriptional repressor p66-alpha                        | IPI00410330,IPI00444526,IPI00478128                                     | 68,044.80  | 465 | 475 | ALQQEQEIEQR                   | K | L | 1,371.69 |
| 1242 | TCP1 T-complex protein 1 subunit alpha                                          | IPI00290566                                                             | 60,327.20  | 468 | 483 | RAFHNEAQVNPERKNL              | L | K | 1,922.99 |
| 1243 | HSP90AA1 heat shock protein 90kDa alpha (cytosolic), class A member 1 isoform 1 | IPI00382470,IPI00784295                                                 | 98,147.10  | 468 | 477 | RAPFDLFENR                    | R | K | 1,264.64 |
| 1244 | DDX17 DEAD box polypeptide 17 isoform 1                                         | IPI00023785,IPI00651653                                                 | 80,256.00  | 469 | 480 | APILIATDVASR                  | K | G | 1,226.71 |
| 1245 | CLTC Isoform 1 of Clathrin heavy chain 1                                        | IPI00024067,IPI00455383                                                 | 191,600.90 | 469 | 481 | SVDPTLALSVYLR                 | K | A | 1,433.80 |
| 1246 | FASN Fatty acid synthase                                                        | IPI00026781                                                             | 273,382.00 | 469 | 477 | GYAVLGGER                     | R | G | 921.4789 |
| 1247 | TCP1 T-complex protein 1 subunit alpha                                          | IPI00290566                                                             | 60,327.20  | 469 | 480 | AFHNEAQVNPER                  | R | K | 1,411.67 |
| 1248 | HSP90AA1 heat shock protein 90kDa alpha (cytosolic), class A member 1 isoform 1 | IPI00382470,IPI00784295                                                 | 98,147.10  | 469 | 477 | APFDLFENR                     | R | K | 1,108.54 |
| 1249 | DDX5 Probable ATP-dependent RNA helicase DDX5                                   | IPI00017617                                                             | 69,131.70  | 471 | 478 | LLQLVEDR                      | K | G | 985.5678 |
| 1250 | ATP1A1 Isoform Long of Sodium/potassium-transporting ATPase subunit alpha-1     | IPI00006482,IPI00646182                                                 | 112,881.50 | 475 | 482 | AKIVEIPF                      | Y | N | 916.5503 |
| 1251 | GATAD2A Isoform 1 of Transcriptional repressor p66-alpha                        | IPI00410330,IPI00444526,IPI00478128                                     | 68,044.80  | 476 | 487 | LLQQGTAPAQAK                  | R | A | 1,225.69 |
| 1252 | TOP2A Isoform 3 of DNA topoisomerase 2-alpha                                    | IPI00218753,IPI00414101,IPI00478232,IPI00879004                         | 178,700.70 | 477 | 486 | LDDANDAGGR                    | K | N | 1,003.44 |
| 1253 | ARS2 Isoform 2 of Arsenite-resistance protein 2                                 | IPI00220038,IPI00375144,IPI00888085,IPI00888510                         | 100,261.00 | 477 | 486 | EICWNLQNIR                    | K | L | 1,345.67 |
| 1254 | SPTBN1 Isoform Long of Spectrin beta chain, brain 1                             | IPI00005614,IPI00871932                                                 | 274,595.40 | 478 | 486 | VQAVVAVAR                     | R | E | 912.5624 |
| 1255 | DDX17 DEAD box polypeptide 17 isoform 1                                         | IPI00023785,IPI00651653                                                 | 80,256.00  | 481 | 488 | GLDVEDVK                      | R | F | 874.4518 |



|      |                                                                                                           |                                                 |            |     |     |                               |   |   |          |
|------|-----------------------------------------------------------------------------------------------------------|-------------------------------------------------|------------|-----|-----|-------------------------------|---|---|----------|
| 1256 | EEF2 Elongation factor 2                                                                                  | IPi00186290                                     | 95,322.10  | 482 | 495 | TGTTTTFEHAHNMR                | K | V | 1,615.76 |
| 1257 | HSP90AB1 Heat shock protein HSP 90-beta                                                                   | IPi00414676                                     | 83,249.30  | 482 | 491 | SIYYITGESK                    | K | E | 1,160.58 |
| 1258 | PFKP 6-phosphofructokinase type C                                                                         | IPi00009790                                     | 85,579.40  | 487 | 496 | YLEEIATQMR                    | K | T | 1,253.62 |
| 1259 | TOP2A Isoform 3 of DNA topoisomerase 2-alpha                                                              | IPi00218753,IPi00414101,IPi00478232,IPi00879004 | 178,700.70 | 487 | 502 | NSTECTLILTEGDSAK              | R | T | 1,738.82 |
| 1260 | CLTC Isoform 1 of Clathrin heavy chain 1                                                                  | IPi00024067,IPi00455383                         | 191,600.90 | 488 | 500 | VIQCFaETGQVQK                 | K | I | 1,507.76 |
| 1261 | CLTC Isoform 1 of Clathrin heavy chain 1                                                                  | IPi00024067,IPi00455383                         | 191,600.90 | 488 | 500 | VIQCFaETGQVQK                 | K | I | 1,507.76 |
| 1262 | XRCC5 ATP-dependent DNA helicase 2 subunit 2                                                              | IPi00220834,IPi00871391                         | 82,689.10  | 490 | 497 | LFQCLLHR                      | R | A | 1,086.59 |
| 1263 | QRICH1 Glutamine-rich protein 1                                                                           | IPi00328200,IPi00791466                         | 86,415.20  | 490 | 500 | NAELEKDAQNR                   | K | L | 1,287.63 |
| 1264 | SMC2 Isoform 1 of Structural maintenance of chromosomes protein 2                                         | IPi00007927,IPi00232806                         | 135,642.70 | 492 | 502 | LKETYEALLAR                   | R | F | 1,306.74 |
| 1265 | HSP90AB1 Heat shock protein HSP 90-beta                                                                   | IPi00414676                                     | 83,249.30  | 492 | 502 | EQVANSaFVER                   | K | V | 1,249.62 |
| 1266 | EIF3B Isoform 1 of Eukaryotic translation initiation factor 3 subunit B                                   | IPi00396370,IPi00719752                         | 92,464.80  | 493 | 501 | VTLMQLPTR                     | R | Q | 1,058.60 |
| 1267 | TFRC Transferrin receptor protein 1                                                                       | IPi00022462                                     | 84,855.60  | 496 | 508 | VSASPLLYTLIEK                 | K | T | 1,433.83 |
| 1268 | PSMD1 Isoform 1 of 26S proteasome non-ATPase regulatory subunit 1                                         | IPi00299608,IPi00456695                         | 105,821.20 | 499 | 524 | TNLYQDDAVTGaAGLALGLV<br>MLGSK | K | N | 2,607.33 |
| 1269 | CCT7 T-complex protein 1 subunit eta                                                                      | IPi00018465                                     | 59,349.80  | 500 | 524 | INALTAaSEAACLIVSVDETIKN<br>PR | R | S | 2,656.40 |
| 1270 | RANGAP1 Ran GTPase-activating protein 1                                                                   | IPi00294879                                     | 63,525.30  | 501 | 515 | AFNSSSFNSNTFLTR               | K | L | 1,692.80 |
| 1271 | HNRNPU cDNA FLJ44920 fis, clone BRAMY3011501, highly similar to Heterogeneous nuclear ribonucleoprotein U | IPi00640106,IPi00644079                         | 83,067.80  | 501 | 515 | NFIELDQTNVSAaAQR              | R | R | 1,647.84 |
| 1272 | TOP2A Isoform 3 of DNA topoisomerase 2-alpha                                                              | IPi00218753,IPi00414101,IPi00478232,IPi00879004 | 178,700.70 | 503 | 514 | TLaVSGLGVVGR                  | K | D | 1,128.67 |
| 1273 | TOP2A Isoform 3 of DNA topoisomerase 2-alpha                                                              | IPi00218753,IPi00414101,IPi00478232,IPi00879004 | 178,700.70 | 503 | 514 | TLaVSGLGVVGR                  | K | D | 1,128.67 |
| 1274 | DHX9 ATP-dependent RNA helicase A                                                                         | IPi00844578                                     | 140,943.50 | 504 | 516 | GISHVIVDEIHER                 | R | D | 1,503.79 |
| 1275 | PLS3 plastin 3                                                                                            | IPi00216694                                     | 70,795.90  | 505 | 518 | YTLNVLEDLGDGQK                | R | A | 1,564.79 |
| 1276 | MTHFD1 C-1-tetrahydrofolate synthase, cytoplasmic                                                         | IPi00218342,IPi00794900                         | 101,543.50 | 505 | 517 | TDPTTLTDEEINR                 | K | F | 1,504.71 |
| 1277 | CCT3 chaperonin containing TCP1, subunit 3 isoform b                                                      | IPi00290770,IPi00553185                         | 60,446.30  | 507 | 517 | TAVETAVLLLRL                  | K | I | 1,185.72 |
| 1278 | CCT3 chaperonin containing TCP1, subunit 3 isoform b                                                      | IPi00290770,IPi00553185                         | 60,446.30  | 507 | 517 | TAVETAVLLLRL                  | K | I | 1,185.72 |
| 1279 | HSP90AA1 heat shock protein 90kDa alpha (cytosolic), class A member 1 isoform 1                           | IPi00382470,IPi00784295                         | 98,147.10  | 507 | 518 | IRGVVDSaDLPL                  | F | N | 1,312.71 |
| 1280 | IGF2BP1 Insulin-like growth factor 2 mRNA-binding protein 1                                               | IPi00008557                                     | 63,438.30  | 509 | 525 | TVNELQNLTAaEVVVR              | K | D | 1,853.01 |
| 1281 | HSP90AA1 heat shock protein 90kDa alpha (cytosolic), class A member 1 isoform 1                           | IPi00382470,IPi00784295                         | 98,147.10  | 509 | 522 | GVVDSaDLPLNISR                | R | E | 1,513.79 |
| 1282 | HSPA8 Isoform 1 of Heat shock cognate 71 kDa protein                                                      | IPi00003865                                     | 70,881.80  | 510 | 517 | LSKEDIER                      | R | M | 989.5263 |
| 1283 | ACACA Isoform 1 of Acetyl-CoA carboxylase 1                                                               | IPi00011569                                     | 265,538.40 | 510 | 532 | ITSENPDaEGFKPSSaGTVQELN<br>FR | R | S | 2,552.23 |
| 1284 | POLR2A DNA-directed RNA polymerase II subunit RPB1                                                        | IPi00031627                                     | 217,193.10 | 513 | 523 | AEIQELAMVPR                   | R | M | 1,272.66 |
| 1285 | GEMIN5 Gem-associated protein 5                                                                           | IPi00291783                                     | 168,544.60 | 515 | 524 | LSGaEAFDINK                   | K | L | 1,093.55 |
| 1286 | TCP1 T-complex protein 1 subunit alpha                                                                    | IPi00290566                                     | 60,327.20  | 516 | 526 | FATEAAITILR                   | K | I | 1,205.69 |
| 1287 | RRM1 Ribonucleoside-diphosphate reductase large subunit                                                   | IPi00013871                                     | 90,055.50  | 517 | 529 | YPFESAaAQLLNK                 | R | Q | 1,509.76 |
| 1288 | COPA Isoform 1 of Coatomer subunit alpha                                                                  | IPi00295857,IPi00646493                         | 138,331.30 | 517 | 529 | KLDALCNiHENIR                 | R | V | 1,595.83 |
| 1289 | PLS3 plastin 3                                                                                            | IPi00216694                                     | 70,795.90  | 519 | 530 | ANDDIIVNWVNR                  | K | T | 1,428.72 |
| 1290 | MTHFD1 C-1-tetrahydrofolate synthase, cytoplasmic                                                         | IPi00218342,IPi00794900                         | 101,543.50 | 521 | 532 | LDIDPETITWQR                  | R | V | 1,486.75 |
| 1291 | KNTC1 Kinetochore-associated protein 1                                                                    | IPi00001458                                     | 250,741.10 | 522 | 533 | LTTFYGaFGPEK                  | K | F | 1,330.67 |
| 1292 | HNRNPU cDNA FLJ44920 fis, clone BRAMY3011501, highly similar to Heterogeneous nuclear ribonucleoprotein U | IPi00640106,IPi00644079                         | 83,067.80  | 522 | 538 | AGFQRKaVVVCPKDEDY             | F | K | 1,981.98 |
| 1293 | HSP90AA1 heat shock protein 90kDa alpha (cytosolic), class A member 1 isoform 1                           | IPi00382470,IPi00784295                         | 98,147.10  | 523 | 529 | EMLQQSK                       | R | I | 863.4292 |
| 1294 | HSPA1A;HSPA1B Heat shock 70 kDa protein 1                                                                 | IPi00304925                                     | 70,036.00  | 525 | 533 | YKaEDEVQR                     | K | E | 1,137.55 |

|      |                                                                                 |                                                                         |            |     |     |                       |   |   |          |
|------|---------------------------------------------------------------------------------|-------------------------------------------------------------------------|------------|-----|-----|-----------------------|---|---|----------|
| 1295 | IPO5 importin 5                                                                 | IPI00793443                                                             | 125,529.30 | 525 | 544 | LVLEQVVTSIASVADTAE EK | K | F | 2,102.12 |
| 1296 | KPNB1 Importin subunit beta-1                                                   | IPI00001639                                                             | 97,153.30  | 526 | 537 | SSAYESLMEIVK          | R | N | 1,356.67 |
| 1297 | JUP Junction plakoglobin                                                        | IPI00554711                                                             | 81,727.90  | 527 | 533 | LVQLLVK               | R | A | 812.5605 |
| 1298 | RARS Isoform Complexed of Arginyl-tRNA synthetase, cytoplasmic                  | IPI00004860                                                             | 75,364.00  | 528 | 540 | GNTAAYLLYAFTR         | R | I | 1,460.75 |
| 1299 | PLS3 plastin 3                                                                  | IPI00216694                                                             | 70,795.90  | 528 | 544 | VNRTLSEAGKSTSIQSF     | W | K | 1,824.95 |
| 1300 | DHX9 ATP-dependent RNA helicase A                                               | IPI00844578                                                             | 140,943.50 | 529 | 538 | DVVQAYPEVR            | R | I | 1,175.61 |
| 1301 | STIP1 Stress-induced-phosphoprotein 1                                           | IPI00013894,IPI00871856                                                 | 62,624.10  | 534 | 543 | LMDVGLIAIR            | K | - | 1,100.65 |
| 1302 | DDX17 DEAD box polypeptide 17 isoform 1                                         | IPI00023785,IPI00651653                                                 | 80,256.00  | 536 | 547 | VLEEANQAINPK          | K | L | 1,325.71 |
| 1303 | TOP2A Isoform 3 of DNA topoisomerase 2-alpha                                    | IPI00218753,IPI00414101,IPI00478232,IPI00879004                         | 178,700.70 | 536 | 548 | QIMENAEINNIK          | K | I | 1,545.79 |
| 1304 | IQGAP1 Ras GTPase-activating-like protein IQGAP1                                | IPI00009342                                                             | 189,240.60 | 539 | 556 | ILAIGLINEALDEGDAQK    | R | T | 1,883.01 |
| 1305 | HSPA8 Isoform 1 of Heat shock cognate 71 kDa protein                            | IPI00003865                                                             | 70,881.80  | 540 | 550 | NSLESYAFNMK           | K | A | 1,303.60 |
| 1306 | HSPA1A;HSPA1B Heat shock 70 kDa protein 1                                       | IPI00304925                                                             | 70,036.00  | 540 | 550 | NALESYAFNMK           | K | S | 1,287.60 |
| 1307 | HSPA1A;HSPA1B Heat shock 70 kDa protein 1                                       | IPI00304925                                                             | 70,036.00  | 540 | 550 | NALESYAFNMK           | K | S | 1,303.60 |
| 1308 | ACACA Isoform 1 of Acetyl-CoA carboxylase 1                                     | IPI00011569                                                             | 265,538.40 | 542 | 552 | SVAAGGLHEF            | F | A | 1,058.53 |
| 1309 | SNRNP200 Isoform 1 of U5 small nuclear ribonucleoprotein 200 kDa helicase       | IPI00420014                                                             | 244,495.80 | 546 | 557 | SLVQEMVGSFGK          | R | R | 1,281.65 |
| 1310 | RARS Isoform Complexed of Arginyl-tRNA synthetase, cytoplasmic                  | IPI00004860                                                             | 75,364.00  | 547 | 557 | LANIDEEMLQK           | R | A | 1,303.66 |
| 1311 | RRM1 Ribonucleoside-diphosphate reductase large subunit                         | IPI00013871                                                             | 90,055.50  | 549 | 563 | EQGPYETIEGSPVSK       | K | G | 1,670.75 |
| 1312 | ATP2A2 Isoform SERCA2A of Sarcoplasmic/endoplasmic reticulum calcium ATPase 2   | IPI00177817,IPI00219078,IPI00747443,IPI00914019                         | 109,674.90 | 550 | 559 | EWGSGSDTLR            | R | C | 1,107.51 |
| 1313 | IPO7 Importin-7                                                                 | IPI00007402                                                             | 119,501.50 | 552 | 564 | ETENDDLTNVIQK         | R | M | 1,518.73 |
| 1314 | PARP1 Poly [ADP-ribose] polymerase 1                                            | IPI00449049                                                             | 113,069.80 | 552 | 564 | VFSATLGLVDIVK         | K | G | 1,361.80 |
| 1315 | AGL Isoform 5 of Glycogen debranching enzyme                                    | IPI00219065,IPI00219066,IPI00328318,IPI00514126,IPI00878798             | 172,612.00 | 554 | 561 | LGISSLIR              | R | E | 858.5408 |
| 1316 | CKAP5 Isoform 1 of Cytoskeleton-associated protein 5                            | IPI00028275,IPI00472887                                                 | 225,483.70 | 557 | 572 | KGKPAAPGGAGNTGTK      | K | N | 1,411.77 |
| 1317 | CKAP5 Isoform 1 of Cytoskeleton-associated protein 5                            | IPI00028275,IPI00472887                                                 | 225,483.70 | 558 | 572 | GKPAAPGGAGNTGTK       | K | N | 1,283.67 |
| 1318 | ACSL3 Long-chain-fatty-acid--CoA ligase 3                                       | IPI00031397                                                             | 80,405.10  | 559 | 575 | WLCTGDIGEFEPDGCLK     | R | I | 1,996.88 |
| 1319 | HSP90AA1 heat shock protein 90kDa alpha (cytosolic), class A member 1 isoform 1 | IPI00382470,IPI00784295                                                 | 98,147.10  | 559 | 565 | FYEQFSK               | K | N | 948.4461 |
| 1320 | PSMD1 Isoform 1 of 26S proteasome non-ATPase regulatory subunit 1               | IPI00299608,IPI00456695                                                 | 105,821.20 | 560 | 572 | MEEADALIESLCR         | R | D | 1,536.70 |
| 1321 | STAG2 stromal antigen 2 isoform a                                               | IPI00470883,IPI00552978,IPI00872562,IPI00902944                         | 145,738.60 | 563 | 577 | ITELFAVALPQLLAK       | K | Y | 1,626.98 |
| 1322 | - 69 kDa protein                                                                | IPI00172590,IPI00658145                                                 | 69,299.70  | 566 | 579 | GSPNTASAEATLPR        | R | W | 1,371.69 |
| 1323 | GCN1L1 Translational activator GCN1                                             | IPI00001159                                                             | 292,732.30 | 568 | 576 | ALVAVLLSR             | R | T | 941.6142 |
| 1324 | IKBKAP Elongator complex protein 1                                              | IPI00293735                                                             | 150,237.40 | 568 | 580 | SVVLQLADGQIFK         | K | Y | 1,417.81 |
| 1325 | IGF2BP3 Isoform 1 of Insulin-like growth factor 2 mRNA-binding protein 3        | IPI00658000                                                             | 63,702.90  | 568 | 577 | ALQSGPPQSR            | K | R | 1,040.55 |
| 1326 | PLS3 plastin 3                                                                  | IPI00216694                                                             | 70,795.90  | 570 | 588 | DLVKSGLNLTEDDKHNNAKY  | Y | A | 2,161.05 |
| 1327 | EIF4G1 eukaryotic translation initiation factor 4 gamma. 1 isoform 2            | IPI00384463,IPI00386533,IPI00479262,IPI00552639,IPI00759560,IPI00798400 | 166,574.80 | 570 | 588 | LQGINCGPDFTPSFANLGR   | R | T | 2,064.00 |
| 1328 | CLTC Isoform 1 of Clathrin heavy chain 1                                        | IPI00024067,IPI00455383                                                 | 191,600.90 | 572 | 583 | NNRPSGQLQTR           | K | L | 1,368.70 |
| 1329 | MTR Methionine synthase                                                         | IPI00743284                                                             | 140,514.40 | 573 | 585 | ISGGLSNLSFSFR         | R | G | 1,384.72 |
| 1330 | COPG2 Coatomer subunit gamma-2                                                  | IPI00002557                                                             | 97,606.50  | 578 | 590 | SIPLAMAPVFEQK         | K | A | 1,430.77 |
| 1331 | ILF3 Isoform 5 of Interleukin enhancer-binding factor 3                         | IPI00219330,IPI00298788,IPI00298789,IPI00414335,IPI00418313,IPI00556173 | 74,589.90  | 578 | 587 | AYAALAALAEK           | K | L | 1,020.57 |
| 1332 | EEF2 Elongation factor 2                                                        | IPI00186290                                                             | 95,322.10  | 581 | 594 | ETVSEESNVLCLSK        | R | S | 1,594.76 |
| 1333 | EEF2 Elongation factor 2                                                        | IPI00186290                                                             | 95,322.10  | 581 | 594 | ETVSEESNVLCLSK        | R | S | 1,594.76 |
| 1334 | NCAPD2 Condensin complex subunit 1                                              | IPI00299524                                                             | 157,155.30 | 584 | 597 | ESTGNMVTGQTVCK        | R | N | 1,511.68 |
| 1335 | HSP90AB1 Heat shock protein HSP 90-beta                                         | IPI00414676                                                             | 83,249.30  | 584 | 604 | LVSSPCCIVTSTYGWTANMER | R | I | 2,448.10 |

|      |                                                                                 |                                                                         |            |     |     |                                                  |        |   |                      |
|------|---------------------------------------------------------------------------------|-------------------------------------------------------------------------|------------|-----|-----|--------------------------------------------------|--------|---|----------------------|
| 1336 | AARS Alanyl-tRNA synthetase, cytoplasmic                                        | IPI00027442,IPI00910701                                                 | 106,795.20 | 585 | 597 | VGDQVWLFIDEPR                                    | K      | R | 1,573.80             |
| 1337 | DIS3 Isoform 1 of Exosome complex exonuclease RRP44                             | IPI00746351                                                             | 108,987.70 | 586 | 596 | ASLTYAEAQLR                                      | K      | I | 1,222.64             |
| 1338 | IARS Isoleucyl-tRNA synthetase, cytoplasmic                                     | IPI00644127,IPI00877938                                                 | 144,944.40 | 590 | 604 | NVIVNGLVLASDGQK                                  | K      | M | 1,526.85             |
| 1339 | HSPH1 Isoform Beta of Heat shock protein 105 kDa                                | IPI00218993,IPI00513743,IPI00514983,IPI00910755                         | 92,099.00  | 592 | 602 | NAVEEYVYEFR                                      | K      | D | 1,418.66             |
| 1340 | UBA1 Ubiquitin-like modifier-activating enzyme 1                                | IPI00645078                                                             | 117,832.30 | 593 | 604 | KPLLESGTLGTK                                     | R      | G | 1,243.73             |
| 1341 | LRRFIP1 Isoform 2 of Leucine-rich repeat flightless-interacting protein 1       | IPI00006207,IPI00382733,IPI00785113                                     | 86,385.20  | 594 | 607 | SAVEAQNEVTENPK                                   | K      | Q | 1,515.73             |
| 1342 | ACACA Isoform 1 of Acetyl-CoA carboxylase 1                                     | IPI00011569                                                             | 265,538.40 | 597 | 607 | LLETESFQMNR                                      | K      | I | 1,367.66             |
| 1343 | HSPA1A;HSPA1B Heat shock 70 kDa protein 1                                       | IPI00304925                                                             | 70,036.00  | 598 | 628 | ELEQVCNPIISGLYQGAGGPG<br>PGGFGAQQPK<br>GGPGGELPR | K<br>R | G | 3,055.49<br>839.4372 |
| 1344 | EIF4G1 eukaryotic translation initiation factor 4 gamma, 1 isoform 2            | IPI00384463,IPI00386533,IPI00479262,IPI00552639,IPI00759560,IPI00798400 | 166,574.80 | 599 | 607 | GGPGGELPR                                        | R      | G | 839.4372             |
| 1345 | EIF4G1 eukaryotic translation initiation factor 4 gamma, 1 isoform 2            | IPI00384463,IPI00386533,IPI00479262,IPI00552639,IPI00759560,IPI00798400 | 166,574.80 | 599 | 607 | GGPGGELPR                                        | R      | G | 839.4372             |
| 1346 | PLS3 plastin 3                                                                  | IPI00216694                                                             | 70,795.90  | 600 | 613 | VYALPEDLVEVKPK                                   | R      | M | 1,599.90             |
| 1347 | SF3B3 Isoform 1 of Splicing factor 3B subunit 3                                 | IPI00300371                                                             | 135,561.40 | 604 | 615 | FLAVGLVDNTR                                      | R      | I | 1,303.74             |
| 1348 | ACTN4 Alpha-actinin-4                                                           | IPI00013808                                                             | 104,839.20 | 605 | 622 | LSGSNPYTTVTPQIINSK                               | K      | W | 1,920.01             |
| 1349 | EEF2 Elongation factor 2                                                        | IPI00186290                                                             | 95,322.10  | 606 | 625 | ARPPFDGLAEDIDKGEVSAR                             | K      | Q | 2,143.08             |
| 1350 | PRPF6 Pre-mRNA-processing factor 6                                              | IPI00305068                                                             | 106,909.70 | 607 | 616 | AEVLWLMGAK                                       | K      | S | 1,117.61             |
| 1351 | ACACA Isoform 1 of Acetyl-CoA carboxylase 1                                     | IPI00011569                                                             | 265,538.40 | 608 | 615 | IDTGWLDR                                         | R      | L | 975.4896             |
| 1352 | TARS Threonyl-tRNA synthetase, cytoplasmic                                      | IPI00329633                                                             | 83,419.80  | 612 | 619 | WPFWLSR                                          | K      | Q | 1,088.57             |
| 1353 | HSP90AB1 Heat shock protein HSP 90-beta                                         | IPI00414676                                                             | 83,249.30  | 613 | 623 | DNSTMGYMMAK                                      | R      | K | 1,248.51             |
| 1354 | PFKP 6-phosphofructokinase type C                                               | IPI00009790                                                             | 85,579.40  | 614 | 625 | DLQSNVEHLTEK                                     | R      | M | 1,412.70             |
| 1355 | ACTN1 Alpha-actinin-1                                                           | IPI00013508,IPI00759776,IPI00909239                                     | 103,043.00 | 614 | 624 | RDQALTEEHAR                                      | R      | Q | 1,325.66             |
| 1356 | GEMIN5 Gem-associated protein 5                                                 | IPI00291783                                                             | 168,544.60 | 616 | 633 | TVIESPESPVTITEPYR                                | K      | T | 2,005.01             |
| 1357 | FANCI Isoform 3 of Fanconi anemia group I protein                               | IPI00306518                                                             | 149,310.90 | 616 | 632 | NSQLANSVMQTLSQLK                                 | R      | Q | 1,875.00             |
| 1358 | GCN1L1 Translational activator GCN1                                             | IPI00001159                                                             | 292,732.30 | 617 | 635 | VLPLEALVTDAGEVTEAGK                              | K      | A | 1,912.03             |
| 1359 | PSMD1 Isoform 1 of 26S proteasome non-ATPase regulatory subunit 1               | IPI00299608,IPI00456695                                                 | 105,821.20 | 617 | 628 | AAVESLGFILFR                                     | R      | T | 1,322.75             |
| 1360 | MYH9 Isoform 1 of Myosin-9                                                      | IPI00019502                                                             | 226,519.50 | 618 | 637 | IIGLDQVAGMSETALPGAFK                             | R      | T | 2,018.06             |
| 1361 | CSE1L Isoform 1 of Exportin-2                                                   | IPI00022744,IPI00219994                                                 | 110,403.90 | 618 | 624 | MFEAICL                                          | Y      | S | 883.4053             |
| 1362 | HSPA4 Heat shock 70 kDa protein 4                                               | IPI00002966                                                             | 94,313.90  | 619 | 629 | NAVEEYVYEMR                                      | K      | D | 1,418.63             |
| 1363 | COPA Isoform 1 of Coatamer subunit alpha                                        | IPI00295857,IPI00646493                                                 | 138,331.30 | 620 | 631 | LVGQSIAYLQK                                      | K      | K | 1,332.79             |
| 1364 | ACACA Isoform 1 of Acetyl-CoA carboxylase 1                                     | IPI00011569                                                             | 265,538.40 | 621 | 645 | VQAERPDTMLGVVCGALHVA<br>DVSLR                    | K      | N | 2,693.39<br>1,235.60 |
| 1365 | HSP90AA1 heat shock protein 90kDa alpha (cytosolic), class A member 1 isoform 1 | IPI00382470,IPI00784295                                                 | 98,147.10  | 622 | 632 | DQVANSAFVER                                      | K      | L | 1,235.60             |
| 1366 | IQGAP1 Ras GTPase-activating-like protein IQGAP1                                | IPI00009342                                                             | 189,240.60 | 623 | 641 | FALGIFAINAEVESGDVGK                              | K      | T | 1,937.00             |
| 1367 | IARS Isoleucyl-tRNA synthetase, cytoplasmic                                     | IPI00644127,IPI00877938                                                 | 144,944.40 | 623 | 630 | GADALRLY                                         | Y      | L | 878.4731             |
| 1368 | PSMD1 Isoform 1 of 26S proteasome non-ATPase regulatory subunit 1               | IPI00299608,IPI00456695                                                 | 105,821.20 | 629 | 649 | TPEQCPSVSVLLSESYNPHV<br>R                        | R      | Y | 2,399.17<br>1,191.64 |
| 1369 | POLD1 DNA polymerase delta catalytic subunit                                    | IPI00002894,IPI00556021,IPI00655631                                     | 123,615.50 | 630 | 639 | LGLTEDQFIR                                       | K      | T | 1,191.64             |
| 1370 | ATP1A1 Isoform Long of Sodium/potassium-transporting ATPase subunit alpha-1     | IPI00006482,IPI00646182                                                 | 112,881.50 | 630 | 647 | GVGIISEGNETVEDIAAR                               | K      | L | 1,829.92             |
| 1371 | ATP1A1 Isoform Long of Sodium/potassium-transporting ATPase subunit alpha-1     | IPI00006482,IPI00646182                                                 | 112,881.50 | 630 | 647 | GVGIISEGNETVEDIAAR                               | K      | L | 1,829.92             |
| 1372 | XRCC5 ATP-dependent DNA helicase 2 subunit 2                                    | IPI00220834,IPI00871391                                                 | 82,689.10  | 632 | 642 | FMKSIDCIRAF                                      | Y      | R | 1,387.69             |
| 1373 | MCM6 DNA replication licensing factor MCM6                                      | IPI00031517                                                             | 92,872.60  | 634 | 643 | MHCCDEVQPK                                       | R      | H | 1,303.52             |
| 1374 | EEF2 Elongation factor 2                                                        | IPI00186290                                                             | 95,322.10  | 634 | 647 | YLAKEYEWDVAEAR                                   | R      | K | 1,742.84             |
| 1375 | RARS Isoform Complexed of Arginyl-tRNA synthetase, cytoplasmic                  | IPI00004860                                                             | 75,364.00  | 635 | 647 | MLLCEAAVMAK                                      | R      | G | 1,406.72             |
| 1376 | SMC3 Structural maintenance of chromosomes protein 3                            | IPI00219420                                                             | 141,529.10 | 635 | 644 | SMEVSTQLAR                                       | R      | A | 1,121.56             |
| 1377 | JUP Junction plakoglobin                                                        | IPI00554711                                                             | 81,727.90  | 638 | 651 | NEGATYAAAVLFR                                    | R      | I | 1,483.75             |

|      |                                                                                           |                                                                                                 |            |     |     |                              |   |   |          |
|------|-------------------------------------------------------------------------------------------|-------------------------------------------------------------------------------------------------|------------|-----|-----|------------------------------|---|---|----------|
| 1378 | DHX9 ATP-dependent RNA helicase A                                                         | IPI00844578                                                                                     | 140,943.50 | 642 | 654 | KYIETLNVPGAVL                | L | V | 1,416.81 |
| 1379 | PC Pyruvate carboxylase, mitochondrial                                                    | IPI00299402                                                                                     | 129,616.70 | 645 | 661 | GANAVGYTNPYDNNVFK            | R | F | 1,828.89 |
| 1380 | ACACA Isoform 1 of Acetyl-CoA carboxylase 1                                               | IPI00011569                                                                                     | 265,538.40 | 646 | 657 | NSVSNFLHSLER                 | R | G | 1,402.71 |
| 1381 | ACACA Isoform 1 of Acetyl-CoA carboxylase 1                                               | IPI00011569                                                                                     | 265,538.40 | 646 | 657 | NSVSNFLHSLER                 | R | G | 1,402.71 |
| 1382 | RARS Isoform Complexed of Arginyl-tRNA synthetase, cytoplasmic                            | IPI00004860                                                                                     | 75,364.00  | 648 | 659 | GFDILGIKPVQR                 | K | - | 1,342.78 |
| 1383 | WDR6 WD repeat-containing protein 6                                                       | IPI00013953,IPI00797612                                                                         | 121,705.90 | 648 | 658 | LHIVNCGGGHR                  | K | S | 1,219.61 |
| 1384 | AARS Alanyl-tRNA synthetase, cytoplasmic                                                  | IPI00027442,IPI00910701                                                                         | 106,795.20 | 651 | 664 | KAEEIANEMIEAAK               | K | A | 1,546.78 |
| 1385 | NCAPG2 Isoform 2 of Condensin-2 complex subunit G2                                        | IPI00396058,IPI00797030,IPI00871611,IPI00917442                                                 | 132,181.70 | 652 | 662 | ASVLPEYLKVF                  | F | K | 1,265.71 |
| 1386 | ACTN4 Alpha-actinin-4                                                                     | IPI00013808                                                                                     | 104,839.20 | 653 | 668 | QFASQANVVGWPWIQTK            | R | M | 1,773.93 |
| 1387 | PCCA propionyl-Coenzyme A carboxylase, alpha polypeptide isoform a precursor              | IPI00744115,IPI00796978,IPI00895869                                                             | 80,041.20  | 654 | 663 | VTEDTSSVLR                   | K | S | 1,106.57 |
| 1388 | ATP2A2 Isoform SERCA2A of Sarcoplasmic/endoplasmic reticulum calcium ATPase 2             | IPI00177817,IPI00219078,IPI00747443,IPI00914019                                                 | 109,674.90 | 656 | 666 | EFDELNPSAQR                  | R | D | 1,305.61 |
| 1389 | ACACA Isoform 1 of Acetyl-CoA carboxylase 1                                               | IPI00011569                                                                                     | 265,538.40 | 658 | 680 | GQVLPAAHTLLNTVDVELIYEG<br>VK | R | Y | 2,508.37 |
| 1390 | DDX17 DEAD box polypeptide 17 isoform 1                                                   | IPI00023785,IPI00651653                                                                         | 80,256.00  | 661 | 679 | GASSTTSTGRSSQSSSQF           | Y | S | 1,890.84 |
| 1391 | SMC3 Structural maintenance of chromosomes protein 3                                      | IPI00219420                                                                                     | 141,529.10 | 662 | 672 | GALTGGYYDTR                  | R | K | 1,173.55 |
| 1392 | RNF160 Zinc finger protein 294                                                            | IPI00783835,IPI00793009                                                                         | 205,167.50 | 662 | 674 | FLSTLLDSFSSSR                | R | V | 1,459.74 |
| 1393 | AARS Alanyl-tRNA synthetase, cytoplasmic                                                  | IPI00027442,IPI00910701                                                                         | 106,795.20 | 665 | 677 | AVYTQDCPLAAAK                | K | A | 1,407.69 |
| 1394 | APEH Acylamino-acid-releasing enzyme                                                      | IPI00337741                                                                                     | 81,206.00  | 665 | 676 | TPLLLMLGQEDR                 | K | R | 1,385.75 |
| 1395 | SFPQ Isoform Long of Splicing factor, proline- and glutamine-rich                         | IPI00010740                                                                                     | 76,131.50  | 667 | 681 | FGQGGAGPVGGQGPR              | R | G | 1,341.67 |
| 1396 | DDX17 DEAD box polypeptide 17 isoform 1                                                   | IPI00023785,IPI00651653                                                                         | 80,256.00  | 671 | 684 | SSQSSSQQFSGIGR               | R | S | 1,455.68 |
| 1397 | EEF2 Elongation factor 2                                                                  | IPI00186290                                                                                     | 95,322.10  | 672 | 683 | LNEIKDSVAVGF                 | Y | Q | 1,291.69 |
| 1398 | TOP2A Isoform 3 of DNA topoisomerase 2-alpha                                              | IPI00218753,IPI00414101,IPI00478232,IPI00879004                                                 | 178,700.70 | 676 | 691 | YSGPEDDAAISLAFSK             | K | K | 1,670.79 |
| 1399 | CKAP5 Isoform 1 of Cytoskeleton-associated protein 5                                      | IPI00028275,IPI00472887                                                                         | 225,483.70 | 677 | 689 | TSAQVVLGGLVVK                | K | I | 1,344.74 |
| 1400 | SF3B3 Isoform 1 of Splicing factor 3B subunit 3                                           | IPI00300371                                                                                     | 135,561.40 | 677 | 690 | TVLDPVTGDLSDTR               | R | T | 1,488.75 |
| 1401 | UBA1 Ubiquitin-like modifier-activating enzyme 1                                          | IPI00645078                                                                                     | 117,832.30 | 679 | 693 | LAGTQPLEVLEAVQR              | R | S | 1,623.91 |
| 1402 | ACSL3 Long-chain-fatty-acid--CoA ligase 3                                                 | IPI00031397                                                                                     | 80,405.10  | 682 | 699 | LSPEPWTPETGLVTDFAK           | R | L | 1,988.00 |
| 1403 | EEF2 Elongation factor 2                                                                  | IPI00186290                                                                                     | 95,322.10  | 689 | 698 | EGALCEENMR                   | K | G | 1,208.50 |
| 1404 | EEF2 Elongation factor 2                                                                  | IPI00186290                                                                                     | 95,322.10  | 689 | 698 | EGALCEENMR                   | K | G | 1,208.50 |
| 1405 | XRCC5 ATP-dependent DNA helicase 2 subunit 2                                              | IPI00220834,IPI00871391                                                                         | 82,689.10  | 689 | 702 | EEASGSSVTAEAAK               | K | K | 1,394.63 |
| 1406 | NCAPD2 Condensin complex subunit 1                                                        | IPI00299524                                                                                     | 157,155.30 | 691 | 698 | EAVLNAYR                     | R | Q | 935.4944 |
| 1407 | AMOT Isoform 1 of Angiomotin                                                              | IPI00163085,IPI00642249,IPI00644547                                                             | 118,066.40 | 693 | 706 | HFALDAAATVAAQR               | R | D | 1,441.75 |
| 1408 | EIF4G1 eukaryotic translation initiation factor 4 gamma. 1 isoform 2                      | IPI00384463,IPI00386533,IPI00479262,IPI00552639,IPI00759560,IPI00798400                         | 166,574.80 | 695 | 706 | QVTQLAIDTEER                 | K | L | 1,402.72 |
| 1409 | CSE1L Isoform 1 of Exportin-2                                                             | IPI00022744,IPI00219994                                                                         | 110,403.90 | 698 | 706 | TGNIPALVR                    | R | L | 940.5575 |
| 1410 | SF3B3 Isoform 1 of Splicing factor 3B subunit 3                                           | IPI00300371                                                                                     | 135,561.40 | 706 | 718 | MQGQEAVLAMSSR                | R | S | 1,407.67 |
| 1411 | EIF4G1 eukaryotic translation initiation factor 4 gamma. 1 isoform 2                      | IPI00384463,IPI00386533,IPI00479262,IPI00552639,IPI00759560,IPI00798400                         | 166,574.80 | 709 | 717 | GVIDLIFEK                    | K | A | 1,033.59 |
| 1412 | EIF4G2 cDNA FLJ59571, highly similar to Eukaryotic translation initiation factor 4gamma 2 | IPI00015952,IPI00782985                                                                         | 110,247.70 | 714 | 722 | SYLAQFAAR                    | K | A | 1,026.54 |
| 1413 | HSP90AA1 heat shock protein 90kDa alpha (cytosolic). class A member 1 isoform 1           | IPI00382470,IPI00784295                                                                         | 98,147.10  | 714 | 734 | LVTSPCCIVTSTYGWTANMER        | R | I | 2,446.12 |
| 1414 | ACTN1 Alpha-actinin-1                                                                     | IPI00013508,IPI00759776,IPI00909239                                                             | 103,043.00 | 715 | 726 | VGWEQLLTIAR                  | R | T | 1,386.77 |
| 1415 | CSE1L Isoform 1 of Exportin-2                                                             | IPI00022744,IPI00219994                                                                         | 110,403.90 | 715 | 736 | GSNTIASAAADKIPGLLVGFQ<br>K   | R | L | 2,158.19 |
| 1416 | DDX17 DEAD box polypeptide 17 isoform 1                                                   | IPI00023785,IPI00651653                                                                         | 80,256.00  | 716 | 729 | QYPPPPPPPPSRK                | Y | - | 1,554.84 |
| 1417 | EIF4G1 eukaryotic translation initiation factor 4 gamma. 1 isoform 2                      | IPI00384463,IPI00386533,IPI00479262,IPI00552639,IPI00759560,IPI00798400                         | 166,574.80 | 718 | 733 | AISEPNFVAVYANMCR             | K | C | 1,829.83 |
| 1418 | NUP93 Nuclear pore complex protein Nup93                                                  | IPI00397904                                                                                     | 93,473.20  | 719 | 730 | LVPLNQESVEER                 | K | V | 1,412.74 |
| 1419 | BAT3 Isoform 1 of Large proline-rich protein BAT3                                         | IPI00465128,IPI00640922,IPI00641333,IPI00641784,IPI00642962,IPI00645431,IPI00894269,IPI00894467 | 119,389.30 | 720 | 732 | AGSSSIAAFIQR                 | R | L | 1,336.69 |

|      |                                                                                 |                                                                                                 |            |     |     |                     |   |   |          |
|------|---------------------------------------------------------------------------------|-------------------------------------------------------------------------------------------------|------------|-----|-----|---------------------|---|---|----------|
| 1420 | MTHFD1 C-1-tetrahydrofolate synthase, cytoplasmic                               | IPI00218342,IPI00794900                                                                         | 101,543.50 | 722 | 733 | AYIQENLELVEK        | K | G | 1,448.76 |
| 1421 | IPO7 Importin-7                                                                 | IPI00007402                                                                                     | 119,501.50 | 725 | 740 | VLTVGAGEDAECHAAK    | K | L | 1,627.77 |
| 1422 | ACTN1 Alpha-actinin-1                                                           | IPI00013508,IPI00759776,IPI00909239                                                             | 103,043.00 | 727 | 738 | TINEVENQILTR        | R | D | 1,429.76 |
| 1423 | IARS Isoleucyl-tRNA synthetase, cytoplasmic                                     | IPI00644127,IPI00877938                                                                         | 144,944.40 | 730 | 740 | FVDILTWNWYVR        | K | M | 1,425.75 |
| 1424 | CKAP5 Isoform 1 of Cytoskeleton-associated protein 5                            | IPI00028275,IPI00472887                                                                         | 225,483.70 | 731 | 744 | NQSETLNWLSNAIK      | K | E | 1,617.82 |
| 1425 | FLII Protein flightless-1 homolog                                               | IPI00031023,IPI00908582                                                                         | 144,737.40 | 731 | 746 | VGLGLGYLELPQINYK    | K | L | 1,776.99 |
| 1426 | MCM6 DNA replication licensing factor MCM6                                      | IPI00031517                                                                                     | 92,872.60  | 733 | 745 | KVEEEEDESALKR       | R | S | 1,561.77 |
| 1427 | ACTN4 Alpha-actinin-4                                                           | IPI00013808                                                                                     | 104,839.20 | 734 | 745 | VGWEQLLTTIAR        | R | T | 1,386.77 |
| 1428 | PWP2 Periodic tryptophan protein 2 homolog                                      | IPI00300078                                                                                     | 102,436.00 | 734 | 749 | VLFDPFELDTSVTPGR    | R | V | 1,792.91 |
| 1429 | GCN1L1 Translational activator GCN1                                             | IPI00001159                                                                                     | 292,732.30 | 738 | 756 | VLPQLISTITASVQNPALR | R | L | 2,021.18 |
| 1430 | BRD2 Isoform 1 of Bromodomain-containing protein 2                              | IPI00014414,IPI00440502,IPI00797929,IPI00892847,IPI00893088,IPI00893622,IPI00894013,IPI00894118 | 88,045.30  | 740 | 751 | LQDVSQGQLNSTK       | R | K | 1,289.67 |
| 1431 | IPO7 Importin-7                                                                 | IPI00007402                                                                                     | 119,501.50 | 741 | 750 | LLEVIILQCK          | K | G | 1,228.73 |
| 1432 | HSP90AA1 heat shock protein 90kDa alpha (cytosolic), class A member 1 isoform 1 | IPI00382470,IPI00784295                                                                         | 98,147.10  | 743 | 753 | DNSTMGYMAAK         | R | K | 1,188.50 |
| 1433 | ACTN4 Alpha-actinin-4                                                           | IPI00013808                                                                                     | 104,839.20 | 746 | 757 | TINEVENQILTR        | R | D | 1,429.76 |
| 1434 | MTHFD1 C-1-tetrahydrofolate synthase, cytoplasmic                               | IPI00218342,IPI00794900                                                                         | 101,543.50 | 749 | 759 | GIPVVVAVNAF         | F | K | 1,085.64 |
| 1435 | POLD1 DNA polymerase delta catalytic subunit                                    | IPI00002894,IPI00556021,IPI00655631                                                             | 123,615.50 | 751 | 762 | VVYGDTDSVMCR        | K | F | 1,401.61 |
| 1436 | IPO7 Importin-7                                                                 | IPI00007402                                                                                     | 119,501.50 | 753 | 768 | GIDQCIPLFVEAALER    | R | L | 1,830.94 |
| 1437 | HSP90AA1 heat shock protein 90kDa alpha (cytosolic), class A member 1 isoform 1 | IPI00382470,IPI00784295                                                                         | 98,147.10  | 755 | 769 | HLEINPDHSIIETLR     | K | Q | 1,786.94 |
| 1438 | DYNC1H1 Cytoplasmic dynein 1 heavy chain 1                                      | IPI00456969                                                                                     | 532,387.60 | 760 | 767 | VPLAIVNK            | R | A | 853.5506 |
| 1439 | ACTN4 Alpha-actinin-4                                                           | IPI00013808                                                                                     | 104,839.20 | 761 | 771 | GISQEQMQEFR         | K | A | 1,352.63 |
| 1440 | MTHFD1 C-1-tetrahydrofolate synthase, cytoplasmic                               | IPI00218342,IPI00794900                                                                         | 101,543.50 | 761 | 772 | TDTESELDLISR        | K | L | 1,378.67 |
| 1441 | CKAP5 Isoform 1 of Cytoskeleton-associated protein 5                            | IPI00028275,IPI00472887                                                                         | 225,483.70 | 762 | 772 | TALAATNPAVR         | K | T | 1,084.61 |
| 1442 | POLD1 DNA polymerase delta catalytic subunit                                    | IPI00002894,IPI00556021,IPI00655631                                                             | 123,615.50 | 763 | 776 | FGVSSVAEAMALGR      | R | E | 1,394.71 |
| 1443 | UHRF1 ubiquitin-like with PHD and ring finger domains 1 isoform 2               | IPI00797279,IPI00797945                                                                         | 91,082.30  | 767 | 776 | AQVFSCPACR          | R | Y | 1,195.53 |
| 1444 | DHX9 ATP-dependent RNA helicase A                                               | IPI00844578                                                                                     | 140,943.50 | 768 | 779 | VRPGFCFHLCSR        | R | A | 1,535.74 |
| 1445 | SF3B3 Isoform 1 of Splicing factor 3B subunit 3                                 | IPI00300371                                                                                     | 135,561.40 | 770 | 786 | LGAVFNQVAFPLQYTPR   | K | K | 1,921.03 |
| 1446 | PWP2 Periodic tryptophan protein 2 homolog                                      | IPI00300078                                                                                     | 102,436.00 | 774 | 784 | LVQEALAVPR          | K | G | 1,224.69 |
| 1447 | EIF4G1 eukaryotic translation initiation factor 4 gamma, 1 isoform 2            | IPI00384463,IPI00386533,IPI00479262,IPI00552639,IPI00759560,IPI00798400                         | 166,574.80 | 780 | 790 | EMDEAATAEER         | K | G | 1,251.52 |
| 1448 | EIF4G1 eukaryotic translation initiation factor 4 gamma, 1 isoform 2            | IPI00384463,IPI00386533,IPI00479262,IPI00552639,IPI00759560,IPI00798400                         | 166,574.80 | 780 | 790 | EMDEAATAEER         | K | G | 1,251.52 |
| 1449 | AARS Alanyl-tRNA synthetase, cytoplasmic                                        | IPI00027442,IPI00910701                                                                         | 106,795.20 | 783 | 793 | AQTAPNKDVQR         | K | E | 1,227.64 |
| 1450 | UBA1 Ubiquitin-like modifier-activating enzyme 1                                | IPI00645078                                                                                     | 117,832.30 | 785 | 802 | AAVATFLQSVQVPEFTPK  | R | S | 1,933.04 |
| 1451 | EEF2 Elongation factor 2                                                        | IPI00186290                                                                                     | 95,322.10  | 786 | 801 | AYLPVNESFGFTADLR    | K | S | 1,799.90 |
| 1452 | EFTUD2 116 kDa U5 small nuclear ribonucleoprotein component                     | IPI00003519,IPI00917777                                                                         | 109,420.10 | 791 | 803 | ILDVAVQAQEPLHR      | K | G | 1,460.82 |
| 1453 | FASN Fatty acid synthase                                                        | IPI00026781                                                                                     | 273,382.00 | 791 | 802 | DNLEFFLAGIGR        | R | L | 1,351.70 |
| 1454 | FASN Fatty acid synthase                                                        | IPI00026781                                                                                     | 273,382.00 | 791 | 802 | DNLEFFLAGIGR        | R | L | 1,351.70 |
| 1455 | MTHFD1 C-1-tetrahydrofolate synthase, cytoplasmic                               | IPI00218342,IPI00794900                                                                         | 101,543.50 | 794 | 804 | GALALAQAVQR         | K | A | 1,097.64 |
| 1456 | KIF4A Isoform 1 of Chromosome-associated kinesin KIF4A                          | IPI00178150,IPI00556059                                                                         | 139,865.70 | 799 | 806 | TFSLTEVR            | R | G | 952.5098 |
| 1457 | GBF1 Golgi-specific brefeldin A-resistance guanine nucleotide exchange factor 1 | IPI00021954                                                                                     | 206,432.60 | 801 | 808 | LLEAFTER            | R | W | 978.5255 |
| 1458 | CSE1L Isoform 1 of Exportin-2                                                   | IPI00022744,IPI00219994                                                                         | 110,403.90 | 801 | 816 | YGALALQEIFDGIQPK    | K | M | 1,762.94 |
| 1459 | FANCI Isoform 3 of Fanconi anemia group I protein                               | IPI00306518                                                                                     | 149,310.90 | 809 | 819 | FVSSLLTALFR         | K | D | 1,253.73 |
| 1460 | CLTC Isoform 1 of Clathrin heavy chain 1                                        | IPI00024067,IPI00455383                                                                         | 191,600.90 | 812 | 830 | LPVVIGLLDVCSEDVIK   | R | N | 2,041.09 |
| 1461 | WDR36 WD repeat-containing protein 36                                           | IPI00169325                                                                                     | 105,307.90 | 815 | 824 | VVNLGVLAQK          | K | S | 1,040.65 |

|      |                                                                      |                                                                         |            |     |     |                                  |   |   |          |
|------|----------------------------------------------------------------------|-------------------------------------------------------------------------|------------|-----|-----|----------------------------------|---|---|----------|
| 1462 | ACACA Isoform 1 of Acetyl-CoA carboxylase 1                          | IPI00011569                                                             | 265,538.40 | 826 | 838 | VQQAELHTGSLPR                    | K | I | 1,435.77 |
| 1463 | MYBBP1A Isoform 1 of Myb-binding protein 1A                          | IPI00005024,IPI00607584                                                 | 148,840.30 | 828 | 838 | VLDLVEVLVTK                      | R | Q | 1,227.76 |
| 1464 | PSMD1 Isoform 1 of 26S proteasome non-ATPase regulatory subunit 1    | IPI00299608,IPI00456695                                                 | 105,821.20 | 828 | 838 | VSTAVLSITAK                      | K | A | 1,089.65 |
| 1465 | PARP1 Poly [ADP-ribose] polymerase 1                                 | IPI00449049                                                             | 113,069.80 | 830 | 837 | DLEVIDIF                         | Y | K | 963.5035 |
| 1466 | PC Pyruvate carboxylase, mitochondrial                               | IPI00299402                                                             | 129,616.70 | 831 | 842 | VFDYSEYWEGAR                     | R | G | 1,521.66 |
| 1467 | COPG2 Coatomer subunit gamma-2                                       | IPI00002557                                                             | 97,606.50  | 833 | 840 | GGYDLLVR                         | R | S | 892.4888 |
| 1468 | RRBP1 Isoform 3 of Ribosome-binding protein 1                        | IPI00215743,IPI00220967,IPI00744135,IPI00856098                         | 165,696.10 | 838 | 850 | LLATEQEDAAVAK                    | K | S | 1,358.72 |
| 1469 | DHX9 ATP-dependent RNA helicase A                                    | IPI00844578                                                             | 140,943.50 | 838 | 853 | ELDALDANDELTPLGR                 | R | I | 1,741.86 |
| 1470 | EIF4G1 eukaryotic translation initiation factor 4 gamma. 1 isoform 2 | IPI00384463,IPI00386533,IPI00479262,IPI00552639,IPI00759560,IPI00798400 | 166,574.80 | 839 | 850 | NHDEESLECLCR                     | K | L | 1,561.64 |
| 1471 | TOP2A Isoform 3 of DNA topoisomerase 2-alpha                         | IPI00218753,IPI00414101,IPI00478232,IPI00879004                         | 178,700.70 | 841 | 851 | YIFTMLSSLAR                      | R | L | 1,301.69 |
| 1472 | FANCI Isoform 3 of Fanconi anemia group I protein                    | IPI00306518                                                             | 149,310.90 | 841 | 849 | YAVNVALQK                        | R | V | 1,005.57 |
| 1473 | SF3B1 Splicing factor 3B subunit 1                                   | IPI00026089                                                             | 145,802.30 | 844 | 852 | VGAAEISR                         | K | I | 915.5258 |
| 1474 | PSMD2 26S proteasome non-ATPase regulatory subunit 2                 | IPI00012268                                                             | 100,184.20 | 846 | 860 | VGQAVDVVGQAGKPK                  | R | T | 1,452.82 |
| 1475 | EIF3CL;EIF3C Eukaryotic translation initiation factor 3 subunit C    | IPI00016910,IPI00646839,IPI00873286,IPI00910003                         | 105,329.20 | 847 | 862 | TEPTAQNLALQLAEK                  | R | L | 1,754.93 |
| 1476 | GEMIN5 Gem-associated protein 5                                      | IPI00291783                                                             | 168,544.60 | 847 | 858 | SLLPLSTSLDHR                     | R | S | 1,338.74 |
| 1477 | DIAPH1 diaphanous 1 isoform 2                                        | IPI00030876,IPI00852685,IPI00884341                                     | 140,500.00 | 848 | 860 | TAQNLSIFLGSFR                    | K | M | 1,453.78 |
| 1478 | MTR Methionine synthase                                              | IPI00743284                                                             | 140,514.40 | 854 | 865 | IPLLIGGATTSK                     | R | T | 1,170.71 |
| 1479 | NCAPD3 Condensin-2 complex subunit D3                                | IPI00747787                                                             | 168,876.10 | 856 | 870 | YIFTLGDIAQLCPAR                  | K | V | 1,737.90 |
| 1480 | SF3B3 Isoform 1 of Splicing factor 3B subunit 3                      | IPI00300371                                                             | 135,561.40 | 857 | 867 | AGNGQWASVIR                      | K | V | 1,158.60 |
| 1481 | PFAS Phosphoribosylformylglycinamide synthase                        | IPI00004534                                                             | 144,645.60 | 863 | 890 | LGGTALAQCFSQLGHEPPDL<br>DLPENLVR | R | A | 3,047.53 |
| 1482 | FASN Fatty acid synthase                                             | IPI00026781                                                             | 273,382.00 | 863 | 874 | NIDTSSESPDHY                     | Y | L | 1,364.56 |
| 1483 | SF3B3 Isoform 1 of Splicing factor 3B subunit 3                      | IPI00300371                                                             | 135,561.40 | 863 | 877 | ASVIRVMNPIQGNTL                  | W | D | 1,612.88 |
| 1484 | PARP1 Poly [ADP-ribose] polymerase 1                                 | IPI00449049                                                             | 113,069.80 | 866 | 878 | TTNFAGILSQGLR                    | R | I | 1,377.75 |
| 1485 | MTHFD1 C-1-tetrahydrofolate synthase, cytoplasmic                    | IPI00218342,IPI00794900                                                 | 101,543.50 | 867 | 878 | THLSLSHNPEQK                     | K | G | 1,390.71 |
| 1486 | EIF4G1 eukaryotic translation initiation factor 4 gamma. 1 isoform 2 | IPI00384463,IPI00386533,IPI00479262,IPI00552639,IPI00759560,IPI00798400 | 166,574.80 | 868 | 877 | MDQYFNQMEK                       | R | I | 1,333.56 |
| 1487 | EFTUD2 116 kDa U5 small nuclear ribonucleoprotein component          | IPI00003519,IPI00917777                                                 | 109,420.10 | 873 | 888 | AFIPAIDSFGFETDLR                 | K | T | 1,798.90 |
| 1488 | FLII Protein flightless-1 homolog                                    | IPI00031023,IPI00908582                                                 | 144,737.40 | 875 | 884 | ADLTALFLPR                       | K | Q | 1,116.64 |
| 1489 | POLD1 DNA polymerase delta catalytic subunit                         | IPI00002894,IPI00556021,IPI00655631                                     | 123,615.50 | 876 | 885 | IDISQLVITK                       | R | E | 1,129.68 |
| 1490 | IPO4 Isoform 1 of Importin-4                                         | IPI00156374,IPI00398009                                                 | 118,700.70 | 876 | 899 | SFAVGTLAETIQGLGAASAQF<br>VSR     | K | L | 2,381.25 |
| 1491 | IPO4 Isoform 1 of Importin-4                                         | IPI00156374,IPI00398009                                                 | 118,700.70 | 878 | 896 | AVGTLAETIQGLGAASAQF              | F | V | 1,804.94 |
| 1492 | POLR2A DNA-directed RNA polymerase II subunit RPB1                   | IPI00031627                                                             | 217,193.10 | 881 | 890 | NSINQVVQLR                       | R | Y | 1,170.66 |
| 1493 | ACTN4 Alpha-actinin-4                                                | IPI00013808                                                             | 104,839.20 | 883 | 899 | MAPYQGPDAVPGALDYK                | R | S | 1,792.86 |
| 1494 | COPB1 Coatomer subunit beta                                          | IPI00295851                                                             | 107,128.00 | 883 | 898 | ALSGYCGFMAANLYAR                 | K | S | 1,764.82 |
| 1495 | ACACA Isoform 1 of Acetyl-CoA carboxylase 1                          | IPI00011569                                                             | 265,538.40 | 888 | 909 | TLRDPSSLPLELQDIMTSVSG<br>R       | K | I | 2,457.30 |
| 1496 | EIF4G1 eukaryotic translation initiation factor 4 gamma. 1 isoform 2 | IPI00384463,IPI00386533,IPI00479262,IPI00552639,IPI00759560,IPI00798400 | 166,574.80 | 890 | 899 | FMLQDVLDLR                       | R | G | 1,249.66 |
| 1497 | AARS Alanyl-tRNA synthetase, cytoplasmic                             | IPI00027442,IPI00910701                                                 | 106,795.20 | 891 | 902 | TVDNEAGKITCL                     | F | C | 1,320.65 |
| 1498 | SF3B3 Isoform 1 of Splicing factor 3B subunit 3                      | IPI00300371                                                             | 135,561.40 | 896 | 911 | FSNTGEDWYVLGVAK                  | R | D | 1,784.89 |
| 1499 | AARS Alanyl-tRNA synthetase, cytoplasmic                             | IPI00027442,IPI00910701                                                 | 106,795.20 | 899 | 912 | ITCLCQVPQNAANR                   | K | G | 1,644.79 |
| 1500 | IPO4 Isoform 1 of Importin-4                                         | IPI00156374,IPI00398009                                                 | 118,700.70 | 900 | 916 | LLPVLLSTAQEADPEVR                | R | S | 1,851.02 |
| 1501 | EIF4G1 eukaryotic translation initiation factor 4 gamma. 1 isoform 2 | IPI00384463,IPI00386533,IPI00479262,IPI00552639,IPI00759560,IPI00798400 | 166,574.80 | 900 | 906 | GSNWVPR                          | R | R | 815.4158 |
| 1502 | PC Pyruvate carboxylase, mitochondrial                               | IPI00299402                                                             | 129,616.70 | 913 | 928 | IVGDLAQFMVQNGLSR                 | K | A | 1,747.92 |
| 1503 | PRKDC Isoform 1 of DNA-dependent protein kinase catalytic subunit    | IPI00296337,IPI00376215,IPI00786995                                     | 469,077.50 | 914 | 924 | VTELALTASDR                      | R | Q | 1,175.63 |

|      |                                                                              |                                                                         |            |      |      |                                 |   |   |          |
|------|------------------------------------------------------------------------------|-------------------------------------------------------------------------|------------|------|------|---------------------------------|---|---|----------|
| 1504 | CKAP5 Isoform 1 of Cytoskeleton-associated protein 5                         | IPI00028275,IPI00472887                                                 | 225,483.70 | 915  | 936  | ILVQQLNILQQLAVAMGPNIK           | K | Q | 2,421.39 |
| 1505 | FANCI Isoform 3 of Fanconi anemia group I protein                            | IPI00306518                                                             | 149,310.90 | 915  | 926  | IFSAVQQFYQPK                    | K | I | 1,455.76 |
| 1506 | AARS Alanyl-tRNA synthetase, cytoplasmic                                     | IPI00027442,IPI00910701                                                 | 106,795.20 | 916  | 930  | ASEWVQQVSGMLMDGK                | K | G | 1,634.78 |
| 1507 | ACLY ATP-citrate synthase                                                    | IPI00021290,IPI00394838                                                 | 120,824.80 | 919  | 934  | DLVSSLTSGLLTIGDR                | K | F | 1,646.90 |
| 1508 | FASN Fatty acid synthase                                                     | IPI00026781                                                             | 273,382.00 | 928  | 936  | TGTVSLEVR                       | K | L | 961.5313 |
| 1509 | FASN Fatty acid synthase                                                     | IPI00026781                                                             | 273,382.00 | 928  | 936  | TGTVSLEVR                       | K | L | 961.5313 |
| 1510 | PC Pyruvate carboxylase, mitochondrial                                       | IPI00299402                                                             | 129,616.70 | 929  | 942  | AEAEAQAEELSFPR                  | R | S | 1,547.73 |
| 1511 | DHX9 ATP-dependent RNA helicase A                                            | IPI00844578                                                             | 140,943.50 | 930  | 938  | MGGEEAEIR                       | R | F | 991.4514 |
| 1512 | GEMIN5 Gem-associated protein 5                                              | IPI00291783                                                             | 168,544.60 | 934  | 942  | GVLQTAER                        | K | G | 944.516  |
| 1513 | FASN Fatty acid synthase                                                     | IPI00026781                                                             | 273,382.00 | 943  | 957  | AFEVSENGNLVVSGK                 | R | V | 1,549.79 |
| 1514 | KIAA0368 KIAA0368 protein                                                    | IPI00157790                                                             | 223,681.10 | 943  | 951  | MSEQQDLER                       | R | N | 1,135.50 |
| 1515 | SF3B3 Isoform 1 of Splicing factor 3B subunit 3                              | IPI00300371                                                             | 135,561.40 | 943  | 958  | TPVEEVPAAIAPFQGR                | K | V | 1,681.89 |
| 1516 | AARS Alanyl-tRNA synthetase, cytoplasmic                                     | IPI00027442,IPI00910701                                                 | 106,795.20 | 944  | 962  | NVGCLQEALQLATSFAQLR             | K | L | 2,119.10 |
| 1517 | EIF4G1 eukaryotic translation initiation factor 4 gamma. 1 isoform 2         | IPI00384463,IPI00386533,IPI00479262,IPI00552639,IPI00759560,IPI00798400 | 166,574.80 | 956  | 972  | GLPLVDDGGWNTVPIISK              | R | G | 1,767.93 |
| 1518 | ACACA Isoform 1 of Acetyl-CoA carboxylase 1                                  | IPI00011569                                                             | 265,538.40 | 959  | 974  | EVFFMNTQSIQVLVQR                | R | Y | 1,955.01 |
| 1519 | ACACA Isoform 1 of Acetyl-CoA carboxylase 1                                  | IPI00011569                                                             | 265,538.40 | 962  | 975  | FMNTQSIQVLVQRY                  | F | R | 1,742.89 |
| 1520 | DYNC1H1 Cytoplasmic dynein 1 heavy chain 1                                   | IPI00456969                                                             | 532,387.60 | 964  | 979  | ITNQVIYLNPPIEECR                | R | Y | 1,959.00 |
| 1521 | FASN Fatty acid synthase                                                     | IPI00026781                                                             | 273,382.00 | 968  | 992  | LFDHPESPTPNPTEPLFLAQA<br>EVYK   | R | E | 2,840.41 |
| 1522 | PRKDC Isoform 1 of DNA-dependent protein kinase catalytic subunit            | IPI00296337,IPI00376215,IPI00786995                                     | 469,077.50 | 972  | 981  | LACDVDQVTR                      | R | Q | 1,176.57 |
| 1523 | IRS4 Insulin receptor substrate 4                                            | IPI00020729                                                             | 133,751.30 | 985  | 994  | ANPLSLDSAR                      | R | W | 1,043.55 |
| 1524 | SF3B3 Isoform 1 of Splicing factor 3B subunit 3                              | IPI00300371                                                             | 135,561.40 | 985  | 999  | HIANYISGIQTIGHR                 | K | V | 1,679.90 |
| 1525 | HEATR1 HEAT repeat-containing protein 1                                      | IPI00024279,IPI00641437                                                 | 242,360.80 | 1002 | 1016 | NLLSCVYSCPSYIAK                 | K | D | 1,774.85 |
| 1526 | EIF4G1 eukaryotic translation initiation factor 4 gamma. 1 isoform 2         | IPI00384463,IPI00386533,IPI00479262,IPI00552639,IPI00759560,IPI00798400 | 166,574.80 | 1009 | 1035 | GSSGGSGAKPSDAASEAARP<br>ATSTLNR | K | F | 2,503.21 |
| 1527 | CLTC Isoform 1 of Clathrin heavy chain 1                                     | IPI00024067,IPI00455383                                                 | 191,600.90 | 1011 | 1022 | IVLDNSVFSEHR                    | K | N | 1,415.73 |
| 1528 | SF3B3 Isoform 1 of Splicing factor 3B subunit 3                              | IPI00300371                                                             | 135,561.40 | 1017 | 1031 | NENQLIIFADDTYPR                 | R | W | 1,808.88 |
| 1529 | PC Pyruvate carboxylase, mitochondrial                                       | IPI00299402                                                             | 129,616.70 | 1022 | 1036 | DFTATFGPLDSLNR                  | K | L | 1,654.81 |
| 1530 | CLTC Isoform 1 of Clathrin heavy chain 1                                     | IPI00024067,IPI00455383                                                 | 191,600.90 | 1023 | 1034 | NLQNLLILTAIK                    | R | A | 1,353.85 |
| 1531 | CLTC Isoform 1 of Clathrin heavy chain 1                                     | IPI00024067,IPI00455383                                                 | 191,600.90 | 1023 | 1034 | NLQNLLILTAIK                    | R | A | 1,353.85 |
| 1532 | MKI67 Isoform Long of Antigen KI-67                                          | IPI00004233,IPI00413173                                                 | 358,677.80 | 1032 | 1043 | VGVKEELLAVGK                    | K | F | 1,241.75 |
| 1533 | PC Pyruvate carboxylase, mitochondrial                                       | IPI00299402                                                             | 129,616.70 | 1037 | 1043 | LFLQGPK                         | R | I | 802.4823 |
| 1534 | ACACA Isoform 1 of Acetyl-CoA carboxylase 1                                  | IPI00011569                                                             | 265,538.40 | 1038 | 1051 | NLLVTMLIDQLCGR                  | K | D | 1,661.87 |
| 1535 | GCN1L1 Translational activator GCN1                                          | IPI00001159                                                             | 292,732.30 | 1043 | 1054 | LLTWVIGTGSPR                    | R | L | 1,299.74 |
| 1536 | PC Pyruvate carboxylase, mitochondrial                                       | IPI00299402                                                             | 129,616.70 | 1044 | 1054 | IAEEFEVELER                     | K | G | 1,363.67 |
| 1537 | FASN Fatty acid synthase                                                     | IPI00026781                                                             | 273,382.00 | 1052 | 1063 | VTAIHIDPATHR                    | R | Q | 1,330.72 |
| 1538 | KIAA0368 KIAA0368 protein                                                    | IPI00157790                                                             | 223,681.10 | 1052 | 1064 | LLLQGLMDSVEAK                   | K | Q | 1,416.78 |
| 1539 | DHX9 ATP-dependent RNA helicase A                                            | IPI00844578                                                             | 140,943.50 | 1058 | 1073 | GMTLVTPQLLLFASK                 | K | K | 1,748.00 |
| 1540 | FASN Fatty acid synthase                                                     | IPI00026781                                                             | 273,382.00 | 1068 | 1083 | TLQDKAQVADVVSRRW                | Y | L | 1,814.98 |
| 1541 | SPTBN1 Isoform Long of Spectrin beta chain, brain 1                          | IPI00005614,IPI00871932                                                 | 274,595.40 | 1070 | 1080 | DLDDFQSWLSR                     | R | T | 1,381.64 |
| 1542 | GEMIN5 Gem-associated protein 5                                              | IPI00291783                                                             | 168,544.60 | 1070 | 1090 | TAAELAAIVGEDELSASLALR           | R | C | 2,100.12 |
| 1543 | FASN Fatty acid synthase                                                     | IPI00026781                                                             | 273,382.00 | 1073 | 1082 | AQVADVVSRR                      | K | W | 1,043.58 |
| 1544 | PC Pyruvate carboxylase, mitochondrial                                       | IPI00299402                                                             | 129,616.70 | 1075 | 1085 | QVFFELNGQLR                     | R | S | 1,350.72 |
| 1545 | FANCI Isoform 3 of Fanconi anemia group I protein                            | IPI00306518                                                             | 149,310.90 | 1079 | 1094 | TAAPTVCLLVLSQAEK                | R | V | 1,700.93 |
| 1546 | ACACA Isoform 1 of Acetyl-CoA carboxylase 1                                  | IPI00011569                                                             | 265,538.40 | 1083 | 1096 | QVLIASHLPSYELR                  | R | H | 1,625.90 |
| 1547 | FASN Fatty acid synthase                                                     | IPI00026781                                                             | 273,382.00 | 1086 | 1104 | VTVAGGVHISGLHTESAPR             | R | R | 1,888.00 |
| 1548 | STAU1 Isoform Short of Double-stranded RNA-binding protein Staufen homolog 1 | IPI00218609,IPI00641873,IPI00643664,IPI_WendyP53Mut                     | 124,563.80 | 1089 | 1102 | LLSELDQQSTEMPR                  | K | T | 1,646.81 |
| 1549 | FASN Fatty acid synthase                                                     | IPI00026781                                                             | 273,382.00 | 1105 | 1116 | RQQEQQVPILEK                    | R | F | 1,495.82 |
| 1550 | DHX9 ATP-dependent RNA helicase A                                            | IPI00844578                                                             | 140,943.50 | 1105 | 1116 | AAMEALVVEVTK                    | R | Q | 1,260.69 |

|      |                                                                                 |                                                                         |            |      |      |                             |   |   |          |
|------|---------------------------------------------------------------------------------|-------------------------------------------------------------------------|------------|------|------|-----------------------------|---|---|----------|
| 1551 | PFAS Phosphoribosylformylglycinamide synthase                                   | IPI00004534                                                             | 144,645.60 | 1110 | 1127 | GVAFVGGFSYADVLGSAK          | R | G | 1,744.89 |
| 1552 | FASN Fatty acid synthase                                                        | IPI00026781                                                             | 273,382.00 | 1117 | 1131 | FCFTPHTTEEGCLSER            | K | A | 1,869.79 |
| 1553 | EIF4G1 eukaryotic translation initiation factor 4 gamma, 1 isoform 2            | IPI00384463,IPI00386533,IPI00479262,IPI00552639,IPI00759560,IPI00798400 | 166,574.80 | 1119 | 1129 | KAASLTEDRDR                 | R | G | 1,261.65 |
| 1554 | GBF1 Golgi-specific brefeldin A-resistance guanine nucleotide exchange factor 1 | IPI00021954                                                             | 206,432.60 | 1125 | 1136 | FLQLESLQELMK                | K | A | 1,478.79 |
| 1555 | FASN Fatty acid synthase                                                        | IPI00026781                                                             | 273,382.00 | 1132 | 1142 | AALQEELQLCK                 | R | G | 1,302.67 |
| 1556 | EIF4EBP3;ANKHD1-EIF4EBP3 ANKHD1-EIF4EBP3 protein                                | IPI00217442,IPI00797397,IPI00798060,IPI00867587                         | 277,154.80 | 1135 | 1144 | QEVVDLLLAR                  | R | G | 1,155.67 |
| 1557 | IRS4 Insulin receptor substrate 4                                               | IPI00020729                                                             | 133,751.30 | 1141 | 1162 | AAAPGIGAAAAAAGFDSASAR L W   | L | F | 1,959.97 |
| 1558 | EIF4EBP3;ANKHD1-EIF4EBP3 ANKHD1-EIF4EBP3 protein                                | IPI00217442,IPI00797397,IPI00798060,IPI00867587                         | 277,154.80 | 1152 | 1172 | NVSDYTPLSLAASGGYVNIIR       | R | I | 2,182.14 |
| 1559 | ACACA Isoform 1 of Acetyl-CoA carboxylase 1                                     | IPI00011569                                                             | 265,538.40 | 1156 | 1169 | RAYIAYELNSVQHR              | R | Q | 1,719.89 |
| 1560 | ACACA Isoform 1 of Acetyl-CoA carboxylase 1                                     | IPI00011569                                                             | 265,538.40 | 1157 | 1169 | AYIAYELNSVQHR               | R | Q | 1,563.79 |
| 1561 | FASN Fatty acid synthase                                                        | IPI00026781                                                             | 273,382.00 | 1158 | 1182 | KMVVPLDGAQIPRDPSQQE L LPRLL | L | S | 2,757.51 |
| 1562 | NCAPD2 Condensin complex subunit 1                                              | IPI00299524                                                             | 157,155.30 | 1160 | 1173 | GNAIYNLLPDIISR              | K | L | 1,558.86 |
| 1563 | CLTC Isoform 1 of Clathrin heavy chain 1                                        | IPI00024067,IPI00455383                                                 | 191,600.90 | 1166 | 1179 | ESYVETELIFALAK              | R | T | 1,612.85 |
| 1564 | GEMIN5 Gem-associated protein 5                                                 | IPI00291783                                                             | 168,544.60 | 1166 | 1182 | SIFSLDTPEQYQEAQFK           | K | L | 2,030.97 |
| 1565 | MTR Methionine synthase                                                         | IPI00743284                                                             | 140,514.40 | 1192 | 1202 | LADIEQSTGIR                 | R | L | 1,202.64 |
| 1566 | GCC2 Isoform 1 of GRIP and coiled-coil domain-containing protein 2              | IPI00005631,IPI00333197,IPI00872239                                     | 184,642.20 | 1198 | 1206 | VTALQEECR                   | R | A | 1,105.53 |
| 1567 | IRS4 Insulin receptor substrate 4                                               | IPI00020729                                                             | 133,751.30 | 1199 | 1218 | GDNQAGGAAAAAAPEPPPR         | R | S | 1,788.86 |
| 1568 | COPA Isoform 1 of Coatomer subunit alpha                                        | IPI00295857,IPI00646493                                                 | 138,331.30 | 1203 | 1217 | VTTVTEIGKDVIGLR             | R | I | 1,600.93 |
| 1569 | SPTAN1 cDNA FLJ61399, highly similar to Spectrin alpha chain, brain             | IPI00744706,IPI00843765,IPI00844215,IPI00871535,IPI00879810             | 282,131.80 | 1206 | 1217 | SQLLGSHEVQR                 | R | F | 1,324.70 |
| 1570 | FASN Fatty acid synthase                                                        | IPI00026781                                                             | 273,382.00 | 1209 | 1225 | LPEDPLLSGLLDSPALK           | K | A | 1,778.00 |
| 1571 | FASN Fatty acid synthase                                                        | IPI00026781                                                             | 273,382.00 | 1209 | 1225 | LPEDPLLSGLLDSPALK           | K | A | 1,778.00 |
| 1572 | CLTC Isoform 1 of Clathrin heavy chain 1                                        | IPI00024067,IPI00455383                                                 | 191,600.90 | 1216 | 1226 | LLYNNVSNFGR                 | K | L | 1,296.67 |
| 1573 | CLTC Isoform 1 of Clathrin heavy chain 1                                        | IPI00024067,IPI00455383                                                 | 191,600.90 | 1216 | 1226 | LLYNNVSNFGR                 | K | L | 1,296.67 |
| 1574 | USP9X ubiquitin specific protease 9, X-linked isoform 4                         | IPI00003964,IPI00221012                                                 | 290,449.30 | 1221 | 1231 | LAQQISDEASR                 | R | Y | 1,217.61 |
| 1575 | GCN1L1 Translational activator GCN1                                             | IPI00001159                                                             | 292,732.30 | 1222 | 1234 | VISESPDQWEAR                | R | C | 1,513.73 |
| 1576 | FASN Fatty acid synthase                                                        | IPI00026781                                                             | 273,382.00 | 1226 | 1239 | ACLDTAVENMPSLK              | K | M | 1,548.74 |
| 1577 | FASN Fatty acid synthase                                                        | IPI00026781                                                             | 273,382.00 | 1226 | 1239 | ACLDTAVENMPSLK              | K | M | 1,548.74 |
| 1578 | CNOT1 Isoform 1 of CCR4-NOT transcription complex subunit 1                     | IPI00166010,IPI00880052                                                 | 266,926.70 | 1228 | 1241 | GQQELLYVVPFVAK              | K | V | 1,590.89 |
| 1579 | TBC1D4 TBC1D4 protein                                                           | IPI00220901                                                             | 146,592.30 | 1228 | 1241 | IQALESNLENLLTR              | K | E | 1,613.89 |
| 1580 | IARS Isoleucyl-tRNA synthetase, cytoplasmic                                     | IPI00644127,IPI00877938                                                 | 144,944.40 | 1231 | 1248 | LFLNETQTQEITEDIPVK          | K | T | 2,118.10 |
| 1581 | ACACA Isoform 1 of Acetyl-CoA carboxylase 1                                     | IPI00011569                                                             | 265,538.40 | 1233 | 1240 | MGGMVSFR                    | R | T | 916.4016 |
| 1582 | SPTBN1 Isoform Long of Spectrin beta chain, brain 1                             | IPI00005614,IPI00871932                                                 | 274,595.40 | 1235 | 1245 | LVSDGNINSDR                 | R | I | 1,189.58 |
| 1583 | EIF4EBP3;ANKHD1-EIF4EBP3 ANKHD1-EIF4EBP3 protein                                | IPI00217442,IPI00797397,IPI00798060,IPI00867587                         | 277,154.80 | 1237 | 1246 | AEVVSLLDR                   | R | K | 1,114.65 |
| 1584 | PDS5A Isoform 2 of Sister chromatid cohesion protein PDS5 homolog A             | IPI00303063,IPI00854642                                                 | 150,817.50 | 1240 | 1252 | TVTAAGAENIQQK               | R | T | 1,330.70 |
| 1585 | FASN Fatty acid synthase                                                        | IPI00026781                                                             | 273,382.00 | 1242 | 1255 | VVEVLAGHGHLYSR              | K | I | 1,536.83 |
| 1586 | FASN Fatty acid synthase                                                        | IPI00026781                                                             | 273,382.00 | 1254 | 1265 | SRIPGLLSPHPL                | Y | L | 1,286.76 |
| 1587 | FASN Fatty acid synthase                                                        | IPI00026781                                                             | 273,382.00 | 1256 | 1275 | IPGLLSPHPLLQLSYATDR         | R | H | 2,192.21 |
| 1588 | GEMIN5 Gem-associated protein 5                                                 | IPI00291783                                                             | 168,544.60 | 1275 | 1284 | SLEAFFLYGR                  | K | L | 1,202.62 |
| 1589 | PRKDC Isoform 1 of DNA-dependent protein kinase catalytic subunit               | IPI00296337,IPI00376215,IPI00786995                                     | 469,077.50 | 1275 | 1292 | TVGALQVLGTEAQSSLLK          | R | A | 1,815.02 |
| 1590 | PRPF8 Pre-mRNA-processing-splicing factor 8                                     | IPI00007928                                                             | 273,590.60 | 1276 | 1290 | EAVVNTQELLDLLVK             | R | C | 1,683.95 |
| 1591 | ACACA Isoform 1 of Acetyl-CoA carboxylase 1                                     | IPI00011569                                                             | 265,538.40 | 1283 | 1294 | DEPIHILNVAIK                | R | T | 1,361.78 |
| 1592 | KTN1 Isoform 1 of Kinetin                                                       | IPI00328753,IPI00337736,IPI00783726,IPI00909030                         | 156,258.20 | 1286 | 1296 | AQQSLELIQSK                 | K | I | 1,244.68 |



|      |                                                                           |                                                             |            |      |      |                       |   |   |          |
|------|---------------------------------------------------------------------------|-------------------------------------------------------------|------------|------|------|-----------------------|---|---|----------|
| 1593 | SF3B1 Splicing factor 3B subunit 1                                        | IPI00026089                                                 | 145,802.30 | 1298 | 1304 | YELDYIL               | R | - | 928.4663 |
| 1594 | MKI67 Isoform Long of Antigen KI-67                                       | IPI00004233,IPI00413173                                     | 358,677.80 | 1320 | 1330 | LDLTENLTGSK           | K | R | 1,190.63 |
| 1595 | SPTAN1 cDNA FLJ61399, highly similar to Spectrin alpha chain, brain       | IPI00744706,IPI00843765,IPI00844215,IPI00871535,IPI00879810 | 282,131.80 | 1350 | 1360 | DVTGAEALLER           | K | H | 1,173.61 |
| 1596 | SNRNP200 Isoform 1 of U5 small nuclear ribonucleoprotein 200 kDa helicase | IPI00420014                                                 | 244,495.80 | 1357 | 1366 | TICAEFAILR            | K | M | 1,193.63 |
| 1597 | GEMIN5 Gem-associated protein 5                                           | IPI00291783                                                 | 168,544.60 | 1373 | 1386 | TVAEVQETLAEMIR        | R | Q | 1,589.82 |
| 1598 | RANBP2 E3 SUMO-protein ligase RanBP2                                      | IPI00221325                                                 | 358,180.20 | 1384 | 1398 | ELVGPPLAETVFTPK       | K | T | 1,597.88 |
| 1599 | FASN Fatty acid synthase                                                  | IPI00026781                                                 | 273,382.00 | 1394 | 1404 | SFYGSTLFLCR           | K | R | 1,350.65 |
| 1600 | MDN1 Midasin                                                              | IPI00167941                                                 | 632,808.30 | 1397 | 1410 | TTICQVFAALANQK        | K | L | 1,564.82 |
| 1601 | CLTC Isoform 1 of Clathrin heavy chain 1                                  | IPI00024067,IPI00455383                                     | 191,600.90 | 1398 | 1406 | VANVELYYR             | K | A | 1,126.59 |
| 1602 | SNRNP200 Isoform 1 of U5 small nuclear ribonucleoprotein 200 kDa helicase | IPI00420014                                                 | 244,495.80 | 1405 | 1417 | VVLLTGETSTDLK         | K | L | 1,375.77 |
| 1603 | FRAP1 FKBP12-rapamycin complex-associated protein                         | IPI00031410                                                 | 288,878.40 | 1407 | 1422 | GPTPAILESLISINNK      | K | L | 1,666.94 |
| 1604 | ACACA Isoform 1 of Acetyl-CoA carboxylase 1                               | IPI00011569                                                 | 265,538.40 | 1410 | 1420 | VEVGTEVTDYR           | K | F | 1,267.62 |
| 1605 | KNTC1 Kinetochores-associated protein 1                                   | IPI00001458                                                 | 250,741.10 | 1414 | 1423 | LGISFQPVFR            | K | Q | 1,163.66 |
| 1606 | CAD CAD protein                                                           | IPI00301263,IPI00893035                                     | 242,964.50 | 1418 | 1431 | LAADFSVPLIIDIK        | R | C | 1,514.88 |
| 1607 | FASN Fatty acid synthase                                                  | IPI00026781                                                 | 273,382.00 | 1430 | 1444 | GILADESSRPVWLK        | K | A | 1,685.89 |
| 1608 | ACACA Isoform 1 of Acetyl-CoA carboxylase 1                               | IPI00011569                                                 | 265,538.40 | 1436 | 1448 | EASFEYLNQNEGER        | K | L | 1,571.70 |
| 1609 | CKAP5 Isoform 1 of Cytoskeleton-associated protein 5                      | IPI00028275,IPI00472887                                     | 225,483.70 | 1442 | 1453 | AQNISSNANMLR          | R | K | 1,318.65 |
| 1610 | FASN Fatty acid synthase                                                  | IPI00026781                                                 | 273,382.00 | 1444 | 1460 | KAINCATSGVVGLVNCL     | L | R | 1,775.91 |
| 1611 | FASN Fatty acid synthase                                                  | IPI00026781                                                 | 273,382.00 | 1445 | 1461 | AINCATSGVVGLVNCLR     | K | R | 1,803.92 |
| 1612 | TOP2A Isoform 3 of DNA topoisomerase 2-alpha                              | IPI00218753,IPI00414101,IPI00478232,IPI00879004             | 178,700.70 | 1476 | 1495 | GTKRDPALNSGVSQKPDPAK  | K | T | 2,066.10 |
| 1613 | TOP2A Isoform 3 of DNA topoisomerase 2-alpha                              | IPI00218753,IPI00414101,IPI00478232,IPI00879004             | 178,700.70 | 1479 | 1495 | RDPALNSGVSQKPDPAK     | K | T | 1,779.94 |
| 1614 | SPTAN1 cDNA FLJ61399, highly similar to Spectrin alpha chain, brain       | IPI00744706,IPI00843765,IPI00844215,IPI00871535,IPI00879810 | 282,131.80 | 1481 | 1499 | IAALQAFADQLIAAGHYAK   | K | G | 1,972.07 |
| 1615 | SNRNP200 Isoform 1 of U5 small nuclear ribonucleoprotein 200 kDa helicase | IPI00420014                                                 | 244,495.80 | 1487 | 1498 | IVALSSSLNAK           | R | D | 1,189.68 |
| 1616 | FASN Fatty acid synthase                                                  | IPI00026781                                                 | 273,382.00 | 1496 | 1507 | VLQGDLMNVYR           | K | D | 1,406.75 |
| 1617 | FLNA Isoform 2 of Filamin-A                                               | IPI00302592,IPI00333541,IPI00644576,IPI00909642             | 279,990.70 | 1520 | 1535 | SISVLYGDEEVPSPF       | Y | K | 1,794.89 |
| 1618 | SPTAN1 cDNA FLJ61399, highly similar to Spectrin alpha chain, brain       | IPI00744706,IPI00843765,IPI00844215,IPI00871535,IPI00879810 | 282,131.80 | 1527 | 1538 | LGESQTLQQFSR          | K | D | 1,393.71 |
| 1619 | GCC2 Isoform 1 of GRIP and coiled-coil domain-containing protein 2        | IPI00005631,IPI00333197,IPI00872239                         | 184,642.20 | 1537 | 1552 | LLPVINTMLQLSPEEK      | R | G | 1,825.01 |
| 1620 | SPTAN1 cDNA FLJ61399, highly similar to Spectrin alpha chain, brain       | IPI00744706,IPI00843765,IPI00844215,IPI00871535,IPI00879810 | 282,131.80 | 1539 | 1550 | DVDEIEAWISEK          | R | L | 1,433.68 |
| 1621 | BCOR Isoform 2 of BCL-6 corepressor                                       | IPI00100291,IPI00439548,IPI00514505                         | 188,186.40 | 1544 | 1555 | FLTDYLNLDLQGR         | K | N | 1,454.73 |
| 1622 | SPTBN1 Isoform Long of Spectrin beta chain, brain 1                       | IPI00005614,IPI00871932                                     | 274,595.40 | 1548 | 1564 | SQNIIVTDSSSLSAEAIK    | R | Q | 1,777.89 |
| 1623 | GCC2 Isoform 1 of GRIP and coiled-coil domain-containing protein 2        | IPI00005631,IPI00333197,IPI00872239                         | 184,642.20 | 1555 | 1568 | LAAVAQGEENASR         | K | S | 1,444.70 |
| 1624 | GCN1L1 Translational activator GCN1                                       | IPI00001159                                                 | 292,732.30 | 1571 | 1590 | NPEILAIAPVLLDALTDPSPR | R | K | 2,118.18 |
| 1625 | SNRNP200 Isoform 1 of U5 small nuclear ribonucleoprotein 200 kDa helicase | IPI00420014                                                 | 244,495.80 | 1571 | 1586 | LTAIDILTTCAADIQR      | R | Q | 1,774.94 |
| 1626 | FASN Fatty acid synthase                                                  | IPI00026781                                                 | 273,382.00 | 1575 | 1582 | DIMLATGK              | R | L | 848.4548 |
| 1627 | ACACA Isoform 1 of Acetyl-CoA carboxylase 1                               | IPI00011569                                                 | 265,538.40 | 1588 | 1606 | FQAQSLGTTYIYDIPMFRR   | R | Q | 2,280.10 |
| 1628 | SPTAN1 cDNA FLJ61399, highly similar to Spectrin alpha chain, brain       | IPI00744706,IPI00843765,IPI00844215,IPI00871535,IPI00879810 | 282,131.80 | 1588 | 1599 | GVIDMGNSLIER          | R | G | 1,303.67 |
| 1629 | SPTAN1 cDNA FLJ61399, highly similar to Spectrin alpha chain, brain       | IPI00744706,IPI00843765,IPI00844215,IPI00871535,IPI00879810 | 282,131.80 | 1613 | 1626 | LAALADQWQFLVQK        | R | S | 1,630.90 |
| 1630 | CNOT1 Isoform 1 of CCR4-NOT transcription complex subunit 1               | IPI00166010,IPI00880052                                     | 266,926.70 | 1641 | 1650 | SLLEVVLRSR            | R | N | 1,114.68 |
| 1631 | HEATR1 HEAT repeat-containing protein 1                                   | IPI00024279,IPI00641437                                     | 242,360.80 | 1644 | 1654 | LVPDLLAIVQR           | K | K | 1,236.77 |
| 1632 | CKAP5 Isoform 1 of Cytoskeleton-associated protein 5                      | IPI00028275,IPI00472887                                     | 225,483.70 | 1655 | 1666 | IEDLEEGQQVIR          | R | S | 1,428.73 |

|      |                                                             |                                     |            |      |      |                            |   |   |          |
|------|-------------------------------------------------------------|-------------------------------------|------------|------|------|----------------------------|---|---|----------|
| 1633 | SPTBN1 Isoform Long of Spectrin beta chain, brain 1         | IPI00005614,IPI00871932             | 274,595.40 | 1657 | 1668 | ALVADSHPESE                | R | I | 1,310.63 |
| 1634 | CNOT1 Isoform 1 of CCR4-NOT transcription complex subunit 1 | IPI00166010,IPI00880052             | 266,926.70 | 1665 | 1683 | AVEGLLDATSGADADLLLR        | K | Y | 1,900.00 |
| 1635 | ACACA Isoform 1 of Acetyl-CoA carboxylase 1                 | IPI00011569                         | 265,538.40 | 1687 | 1698 | RIGSFGPQEDLL               | Y | F | 1,331.70 |
| 1636 | FASN Fatty acid synthase                                    | IPI00026781                         | 273,382.00 | 1712 | 1724 | FPQLDSTSFANSR              | R | D | 1,469.70 |
| 1637 | CAD CAD protein                                             | IPI00301263,IPI00893035             | 242,964.50 | 1723 | 1731 | LSLDDLLQFR                 | R | L | 1,072.60 |
| 1638 | ACACA Isoform 1 of Acetyl-CoA carboxylase 1                 | IPI00011569                         | 265,538.40 | 1724 | 1731 | IGLAEIIR                   | R | H | 900.515  |
| 1639 | FASN Fatty acid synthase                                    | IPI00026781                         | 273,382.00 | 1740 | 1758 | GVDLVNLNSLAEKQLQASVR       | K | C | 2,041.13 |
| 1640 | ACACA Isoform 1 of Acetyl-CoA carboxylase 1                 | IPI00011569                         | 265,538.40 | 1759 | 1780 | KRVSALNSVHCEHVEDEGES<br>RY | Y | K | 2,601.21 |
| 1641 | KIF20B Isoform 1 of M-phase phosphoprotein 1                | IPI00044751,IPI00412862,IPI00827503 | 210,671.10 | 1760 | 1774 | LSNVEASKENVSQPK            | K | R | 1,629.84 |
| 1642 | ACACA Isoform 1 of Acetyl-CoA carboxylase 1                 | IPI00011569                         | 265,538.40 | 1761 | 1779 | VSALNSVHCEHVEDEGESR        | R | Y | 2,153.95 |
| 1643 | KIAA0368 KIAA0368 protein                                   | IPI00157790                         | 223,681.10 | 1763 | 1777 | AIACVVTACSAELEK            | K | S | 1,621.79 |
| 1644 | ACACA Isoform 1 of Acetyl-CoA carboxylase 1                 | IPI00011569                         | 265,538.40 | 1765 | 1780 | NSVHCEHVEDEGESRY           | L | K | 1,946.79 |
| 1645 | ACACA Isoform 1 of Acetyl-CoA carboxylase 1                 | IPI00011569                         | 265,538.40 | 1782 | 1798 | ITDIIGKEEGIGPENLR          | K | G | 1,854.00 |
| 1646 | GCN1L1 Translational activator GCN1                         | IPI00001159                         | 292,732.30 | 1785 | 1794 | ALADENEFVR                 | K | D | 1,163.57 |
| 1647 | FASN Fatty acid synthase                                    | IPI00026781                         | 273,382.00 | 1809 | 1819 | EVWALVQAGIR                | R | D | 1,241.70 |
| 1648 | ACACA Isoform 1 of Acetyl-CoA carboxylase 1                 | IPI00011569                         | 265,538.40 | 1824 | 1833 | AIGIGAYLVR                 | R | L | 1,032.62 |
| 1649 | FASN Fatty acid synthase                                    | IPI00026781                         | 273,382.00 | 1828 | 1841 | CTVFHGAQVEDAFR             | K | Y | 1,636.75 |
| 1650 | FASN Fatty acid synthase                                    | IPI00026781                         | 273,382.00 | 1832 | 1842 | HGAQVEDAFRY                | F | M | 1,292.60 |
| 1651 | ACACA Isoform 1 of Acetyl-CoA carboxylase 1                 | IPI00011569                         | 265,538.40 | 1838 | 1856 | TIQVENSILITGAGALNK         | R | V | 1,979.09 |
| 1652 | FASN Fatty acid synthase                                    | IPI00026781                         | 273,382.00 | 1852 | 1866 | VVVQVLAEEPEAVLK            | K | G | 1,622.94 |
| 1653 | CKAP5 Isoform 1 of Cytoskeleton-associated protein 5        | IPI00028275,IPI00472887             | 225,483.70 | 1860 | 1870 | YSDADIEPFLK                | K | N | 1,297.63 |
| 1654 | CKAP5 Isoform 1 of Cytoskeleton-associated protein 5        | IPI00028275,IPI00472887             | 225,483.70 | 1871 | 1882 | NSSQFFQSYVER               | K | G | 1,491.69 |
| 1655 | GCN1L1 Translational activator GCN1                         | IPI00001159                         | 292,732.30 | 1872 | 1881 | AIITALGVER                 | K | R | 1,042.63 |
| 1656 | MKI67 Isoform Long of Antigen KI-67                         | IPI00004233,IPI00413173             | 358,677.80 | 1928 | 1938 | LDLLGNLPGSK                | K | R | 1,126.65 |
| 1657 | HEATR1 HEAT repeat-containing protein 1                     | IPI00024279,IPI00641437             | 242,360.80 | 1933 | 1946 | LLTFYNLADCIAEK             | R | L | 1,670.85 |
| 1658 | FASN Fatty acid synthase                                    | IPI00026781                         | 273,382.00 | 1956 | 1969 | IAEAAQLGPVGGVF             | L | N | 1,328.72 |
| 1659 | FASN Fatty acid synthase                                    | IPI00026781                         | 273,382.00 | 1970 | 1975 | NLAVVL                     | F | R | 628.4028 |
| 1660 | ACACA Isoform 1 of Acetyl-CoA carboxylase 1                 | IPI00011569                         | 265,538.40 | 1978 | 1991 | LGGIPVGVVAVETR             | R | T | 1,366.81 |
| 1661 | FASN Fatty acid synthase                                    | IPI00026781                         | 273,382.00 | 1996 | 2004 | YSGTLNLDR                  | K | V | 1,038.52 |
| 1662 | FASN Fatty acid synthase                                    | IPI00026781                         | 273,382.00 | 2008 | 2026 | EACPELDYFVVFSSVSCGR        | R | G | 2,221.99 |
| 1663 | ACACA Isoform 1 of Acetyl-CoA carboxylase 1                 | IPI00011569                         | 265,538.40 | 2010 | 2025 | IIQQAGQVWFPSAFK            | K | T | 1,834.95 |
| 1664 | FASN Fatty acid synthase                                    | IPI00026781                         | 273,382.00 | 2020 | 2034 | SSVSCGRGNAGQSNY            | F | G | 1,543.66 |
| 1665 | ACACA Isoform 1 of Acetyl-CoA carboxylase 1                 | IPI00011569                         | 265,538.40 | 2026 | 2035 | TYQAIKDFNR                 | K | E | 1,255.64 |
| 1666 | FASN Fatty acid synthase                                    | IPI00026781                         | 273,382.00 | 2027 | 2043 | GNAGQSNYGFANSAMER          | R | I | 1,773.76 |
| 1667 | ACACA Isoform 1 of Acetyl-CoA carboxylase 1                 | IPI00011569                         | 265,538.40 | 2036 | 2047 | EGLPLMVFANWR               | R | G | 1,448.74 |
| 1668 | TLN1 Talin-1                                                | IPI00298994                         | 269,747.10 | 2044 | 2057 | LAQAAQSSVATITR             | K | L | 1,416.78 |
| 1669 | ACACA Isoform 1 of Acetyl-CoA carboxylase 1                 | IPI00011569                         | 265,538.40 | 2063 | 2072 | FGAYIVDGLR                 | K | E | 1,110.59 |
| 1670 | SPTBN1 Isoform Long of Spectrin beta chain, brain 1         | IPI00005614,IPI00871932             | 274,595.40 | 2079 | 2088 | LTTLELLEVR                 | R | R | 1,186.70 |
| 1671 | HEATR1 HEAT repeat-containing protein 1                     | IPI00024279,IPI00641437             | 242,360.80 | 2082 | 2094 | FAALITVLALAEK              | R | L | 1,359.82 |
| 1672 | ACACA Isoform 1 of Acetyl-CoA carboxylase 1                 | IPI00011569                         | 265,538.40 | 2090 | 2103 | GGSWVIDSSINPR              | R | H | 1,486.76 |
| 1673 | GCN1L1 Translational activator GCN1                         | IPI00001159                         | 292,732.30 | 2093 | 2107 | VLAFLSSVAGDALTR            | R | H | 1,519.85 |
| 1674 | GCN1L1 Translational activator GCN1                         | IPI00001159                         | 292,732.30 | 2151 | 2161 | IIIEDLLEATR                | R | S | 1,285.74 |
| 1675 | FASN Fatty acid synthase                                    | IPI00026781                         | 273,382.00 | 2169 | 2177 | ELNLVLSVR                  | R | E | 1,042.63 |
| 1676 | SPTBN1 Isoform Long of Spectrin beta chain, brain 1         | IPI00005614,IPI00871932             | 274,595.40 | 2178 | 2191 | TALPAQSAATLTPAR            | K | T | 1,367.76 |
| 1677 | CNOT1 Isoform 1 of CCR4-NOT transcription complex subunit 1 | IPI00166010,IPI00880052             | 266,926.70 | 2188 | 2197 | SPVTFLSDLR                 | R | S | 1,134.62 |
| 1678 | FASN Fatty acid synthase                                    | IPI00026781                         | 273,382.00 | 2194 | 2206 | ADEASELACPTPK              | K | E | 1,388.64 |

|             |                                                                     |                                                             |            |      |      |                            |   |   |          |
|-------------|---------------------------------------------------------------------|-------------------------------------------------------------|------------|------|------|----------------------------|---|---|----------|
| <b>1679</b> | FASN Fatty acid synthase                                            | IPI00026781                                                 | 273,382.00 | 2207 | 2220 | EDGLAQQQTQLNLR             | K | S | 1,613.82 |
| <b>1680</b> | FASN Fatty acid synthase                                            | IPI00026781                                                 | 273,382.00 | 2221 | 2233 | SLLVNPEGPTLMR              | R | L | 1,442.77 |
| <b>1681</b> | ACACA Isoform 1 of Acetyl-CoA carboxylase 1                         | IPI00011569                                                 | 265,538.40 | 2232 | 2249 | IHNANPELTDGQIQAMLR         | K | R | 2,037.02 |
| <b>1682</b> | FASN Fatty acid synthase                                            | IPI00026781                                                 | 273,382.00 | 2276 | 2294 | AAPLDSIHSLAAYYIDCIR        | R | Q | 2,149.07 |
| <b>1683</b> | FASN Fatty acid synthase                                            | IPI00026781                                                 | 273,382.00 | 2289 | 2302 | YIDCIRQVQPEGPY             | Y | R | 1,737.83 |
| <b>1684</b> | FASN Fatty acid synthase                                            | IPI00026781                                                 | 273,382.00 | 2383 | 2391 | VLEALLPLK                  | R | G | 995.6501 |
| <b>1685</b> | FASN Fatty acid synthase                                            | IPI00026781                                                 | 273,382.00 | 2397 | 2406 | VAAAVDLIIK                 | R | S | 1,012.64 |
| <b>1686</b> | FASN Fatty acid synthase                                            | IPI00026781                                                 | 273,382.00 | 2429 | 2436 | AAEQYTPK                   | R | A | 907.452  |
| <b>1687</b> | SPTAN1 cDNA FLJ61399, highly similar to Spectrin alpha chain, brain | IPI00744706,IPI00843765,IPI00844215,IPI00871535,IPI00879810 | 282,131.80 | 2435 | 2447 | ELPTAFDYVEFTR              | R | S | 1,587.77 |
| <b>1688</b> | FASN Fatty acid synthase                                            | IPI00026781                                                 | 273,382.00 | 2450 | 2471 | TGGAYGEDLGADYNLSQVCD<br>GK | K | V | 2,289.99 |
| <b>1689</b> | DYNC1H1 Cytoplasmic dynein 1 heavy chain 1                          | IPI00456969                                                 | 532,387.60 | 3924 | 3937 | IQGLTVEQAEAVVR             | R | L | 1,512.84 |
| <b>1690</b> | DYNC1H1 Cytoplasmic dynein 1 heavy chain 1                          | IPI00456969                                                 | 532,387.60 | 4264 | 4271 | LLNTFLER                   | R | L | 1,005.57 |

**Supplemental Dataset Table 3. Heavy-Lys Containing Peptides Identified Following Heavy-Lys and Ani-labeling and DIBAC-Biotin Enrichment**

Legend:

N-terminal Peptide (amino acid start index = 1)

N-terminal Peptide (amino acid start index = 2)

Internal Peptide

C-terminal Peptide

|    | Protein name                                                                   | Protein accession numbers                                   | Protein molecular weight (Da) | Peptide start index | Peptide stop index | Peptide sequence  | Previous amino acid | Next amino acid | Calculated +1H peptide mass (AMU) |
|----|--------------------------------------------------------------------------------|-------------------------------------------------------------|-------------------------------|---------------------|--------------------|-------------------|---------------------|-----------------|-----------------------------------|
| 1  | CFL1 Cofilin-1                                                                 | IPI00012011                                                 | 18,485.10                     | 2                   | 13                 | ASGVAVSDGVIK      | M                   | V               | 1,152.64                          |
| 2  | TUBB Tubulin beta chain                                                        | IPI00011654                                                 | 49652.6                       | 3                   | 19                 | EIVHIQAGQCGNQIGAK | R                   | F               | 1830.9373                         |
| 3  | TUBB2B Tubulin beta-2B chain                                                   | IPI00031370                                                 | 49935.1                       | 3                   | 19                 | EIVHIQAGQCGNQIGAK | R                   | F               | 1830.9373                         |
| 4  | TUBB Tubulin beta chain                                                        | IPI00011654                                                 | 49,652.60                     | 3                   | 19                 | EIVHIQAGQCGNQIGAK | R                   | F               | 1,830.94                          |
| 5  | TUBB2C Tubulin beta-2C chain                                                   | IPI00007752                                                 | 49,812.70                     | 3                   | 19                 | EIVHLQAGQCGNQIGAK | R                   | F               | 1,830.94                          |
| 6  | GAPDH Glyceraldehyde-3-phosphate dehydrogenase                                 | IPI00219018                                                 | 36,035.30                     | 4                   | 13                 | VKVGVNGFGR        | K                   | I               | 1,040.61                          |
| 7  | GAPDH Glyceraldehyde-3-phosphate dehydrogenase                                 | IPI00219018                                                 | 36,035.30                     | 4                   | 13                 | VKVGVNGFGR        | K                   | I               | 1,040.61                          |
| 8  | HNRNPA1 Isoform A1-B of Heterogeneous nuclear ribonucleoprotein A1             | IPI00215965,IPI00465365                                     | 38,828.10                     | 4                   | 15                 | SESPKEPEQLRK      | K                   | L               | 1,443.78                          |
| 9  | RPL17;LOC100133931 60S ribosomal protein L17                                   | IPI00413324                                                 | 21,379.40                     | 4                   | 13                 | YSLDPENPTK        | R                   | S               | 1,171.57                          |
| 10 | SFRS3 Splicing factor, arginine/serine-rich 3                                  | IPI00010204,IPI00843996                                     | 19,312.00                     | 4                   | 11                 | DSCPLDCK          | R                   | V               | 1,002.41                          |
| 11 | SFRS3 Splicing factor, arginine/serine-rich 3                                  | IPI00010204,IPI00843996                                     | 19,312.00                     | 4                   | 11                 | DSCPLDCK          | R                   | V               | 1,002.41                          |
| 12 | SFRS3 Splicing factor, arginine/serine-rich 3                                  | IPI00010204,IPI00843996                                     | 19,312.00                     | 4                   | 11                 | DSCPLDCK          | R                   | V               | 1,002.41                          |
| 13 | TPT1 Tumor protein, translationally-controlled 1                               | IPI00009943,IPI00384863,IPI00550900,IPI00908553,IPI00910288 | 21,508.50                     | 6                   | 19                 | DLISHDEMFSDIYK    | R                   | I               | 1,736.79                          |
| 14 | TPT1 Tumor protein, translationally-controlled 1                               | IPI00009943,IPI00384863,IPI00550900,IPI00908553,IPI00910288 | 21,508.50                     | 6                   | 19                 | DLISHDEMFSDIYK    | R                   | I               | 1,736.79                          |
| 15 | NAT13 Isoform 1 of N-acetyltransferase 13                                      | IPI00018627                                                 | 19,380.90                     | 6                   | 17                 | IELGDVTPHNIK      | R                   | Q               | 1,343.74                          |
| 16 | NAT13 Isoform 1 of N-acetyltransferase 13                                      | IPI00018627                                                 | 19,380.90                     | 6                   | 17                 | IELGDVTPHNIK      | R                   | Q               | 1,343.74                          |
| 17 | RAP1B Ras-related protein Rap-1b                                               | IPI00015148,IPI00796349,IPI00908754,IPI00910592             | 20,806.90                     | 6                   | 16                 | LVVLGSGGVGK       | K                   | S               | 993.6184                          |
| 18 | HRAS GTPase HRas                                                               | IPI00000006                                                 | 21,280.10                     | 6                   | 16                 | LVVVGAGGVGK       | K                   | S               | 963.6078                          |
| 19 | EEF1A1 Elongation factor 1-alpha 1                                             | IPI00396485,IPI00472724                                     | 50,123.20                     | 6                   | 20                 | THINIVVIGHVDSGK   | K                   | S               | 1,596.89                          |
| 20 | RAP1B Ras-related protein Rap-1b                                               | IPI00015148,IPI00796349,IPI00908754,IPI00910592             | 20,806.90                     | 6                   | 16                 | LVVLGSGGVGK       | K                   | S               | 993.6184                          |
| 21 | HRAS GTPase HRas                                                               | IPI00000006                                                 | 21,280.10                     | 6                   | 16                 | LVVVGAGGVGK       | K                   | S               | 963.6078                          |
| 22 | EEF1A2 Elongation factor 1-alpha 2                                             | IPI00014424                                                 | 50,452.60                     | 6                   | 20                 | THINIVVIGHVDSGK   | K                   | S               | 1,596.89                          |
| 23 | EEF1A1 Elongation factor 1-alpha 1                                             | IPI00396485,IPI00472724                                     | 50,123.20                     | 6                   | 20                 | THINIVVIGHVDSGK   | K                   | S               | 1,596.89                          |
| 24 | PCNA Proliferating cell nuclear antigen                                        | IPI00021700                                                 | 28,751.30                     | 6                   | 14                 | LVQGSILKK         | R                   | V               | 1,001.67                          |
| 25 | PCNA Proliferating cell nuclear antigen                                        | IPI00021700                                                 | 28,751.30                     | 6                   | 14                 | LVQGSILKK         | R                   | V               | 1,001.67                          |
| 26 | PCNA Proliferating cell nuclear antigen                                        | IPI00021700                                                 | 28,751.30                     | 6                   | 14                 | LVQGSILKK         | R                   | V               | 1,001.67                          |
| 27 | RPL23A;hCG_16001 60S ribosomal protein L23a                                    | IPI00021266                                                 | 17,678.20                     | 7                   | 18                 | KEAPAPPKAEAK      | K                   | A               | 1,260.74                          |
| 28 | RPL23A;hCG_16001 60S ribosomal protein L23a                                    | IPI00021266                                                 | 17,678.20                     | 7                   | 18                 | KEAPAPPKAEAK      | K                   | A               | 1,260.74                          |
| 29 | ATP1A1 Isoform Long of Sodium/potassium-transporting ATPase subunit alpha-1    | IPI00006482,IPI00646182                                     | 112,881.50                    | 8                   | 22                 | DKYEPAVSEQGDKK    | R                   | G               | 1,688.86                          |
| 30 | CHMP2A Charged multivesicular body protein 2a                                  | IPI00004416                                                 | 25,087.00                     | 8                   | 16                 | RKTPEELLR         | R                   | Q               | 1,149.68                          |
| 31 | CHMP2A Charged multivesicular body protein 2a                                  | IPI00004416                                                 | 25,087.00                     | 8                   | 16                 | RKTPEELLR         | R                   | Q               | 1,149.68                          |
| 32 | EEF1B2 Elongation factor 1-beta                                                | IPI00178440                                                 | 24,746.20                     | 8                   | 22                 | SPAGLQVLNDYLADK   | K                   | S               | 1,611.85                          |
| 33 | RPS10 40S ribosomal protein S10                                                | IPI00008438                                                 | 18,880.30                     | 9                   | 17                 | IAIYELLFK         | R                   | E               | 1,117.67                          |
| 34 | RPS10 40S ribosomal protein S10                                                | IPI00008438                                                 | 18,880.30                     | 9                   | 17                 | IAIYELLFK         | R                   | E               | 1,117.67                          |
| 35 | RPS10 40S ribosomal protein S10                                                | IPI00008438                                                 | 18,880.30                     | 9                   | 17                 | IAIYELLFK         | R                   | E               | 1,117.67                          |
| 36 | RPS10 40S ribosomal protein S10                                                | IPI00008438                                                 | 18,880.30                     | 9                   | 17                 | IAIYELLFK         | R                   | E               | 1,117.67                          |
| 37 | RPS10 40S ribosomal protein S10                                                | IPI00008438                                                 | 18,880.30                     | 9                   | 17                 | IAIYELLFK         | R                   | E               | 1,117.67                          |
| 38 | BUB3 Mitotic checkpoint protein BUB3                                           | IPI00013468,IPI00514701,IPI00644108                         | 37,136.70                     | 9                   | 21                 | LNQPPEDGISSVK     | K                   | F               | 1,391.73                          |
| 39 | PPP2CA Serine/threonine-protein phosphatase 2A catalytic subunit alpha isoform | IPI00008380                                                 | 35,576.50                     | 9                   | 21                 | ELDQWIEQLNECK     | K                   | Q               | 1,712.80                          |
| 40 | PPP2CA Serine/threonine-protein phosphatase 2A catalytic subunit alpha isoform | IPI00008380                                                 | 35,576.50                     | 9                   | 21                 | ELDQWIEQLNECK     | K                   | Q               | 1,712.80                          |

|    |                                                               |                                                                                                                                                                                                                                                                         |           |    |    |                  |   |   |          |
|----|---------------------------------------------------------------|-------------------------------------------------------------------------------------------------------------------------------------------------------------------------------------------------------------------------------------------------------------------------|-----------|----|----|------------------|---|---|----------|
| 41 | RBMX Heterogeneous nuclear ribonucleoprotein G                | IPI00304692                                                                                                                                                                                                                                                             | 42,315.70 | 10 | 22 | LFIGGLNTETNEK    | K | A | 1,443.76 |
| 42 | RBMX Heterogeneous nuclear ribonucleoprotein G                | IPI00304692                                                                                                                                                                                                                                                             | 42,315.70 | 10 | 22 | LFIGGLNTETNEK    | K | A | 1,443.76 |
| 43 | RBMX Heterogeneous nuclear ribonucleoprotein G                | IPI00304692                                                                                                                                                                                                                                                             | 42,315.70 | 10 | 22 | LFIGGLNTETNEK    | K | A | 1,443.76 |
| 44 | RBMX Heterogeneous nuclear ribonucleoprotein G                | IPI00304692                                                                                                                                                                                                                                                             | 42,315.70 | 10 | 22 | LFIGGLNTETNEK    | K | A | 1,443.76 |
| 45 | RBMX Heterogeneous nuclear ribonucleoprotein G                | IPI00304692                                                                                                                                                                                                                                                             | 42,315.70 | 10 | 22 | LFIGGLNTETNEK    | K | A | 1,443.76 |
| 46 | RBMX Heterogeneous nuclear ribonucleoprotein G                | IPI00304692                                                                                                                                                                                                                                                             | 42,315.70 | 10 | 22 | LFIGGLNTETNEK    | K | A | 1,443.76 |
| 47 | RBMX Heterogeneous nuclear ribonucleoprotein G                | IPI00304692                                                                                                                                                                                                                                                             | 42,315.70 | 10 | 22 | LFIGGLNTETNEK    | K | A | 1,443.76 |
| 48 | RBMX Heterogeneous nuclear ribonucleoprotein G                | IPI00304692                                                                                                                                                                                                                                                             | 42,315.70 | 10 | 22 | LFIGGLNTETNEK    | K | A | 1,443.76 |
| 49 | AK1 Adenylate kinase isoenzyme 1                              | IPI00018342,IPI00640817                                                                                                                                                                                                                                                 | 21,617.10 | 10 | 21 | IIFVVGPGGSGK     | K | G | 1,138.67 |
| 50 | CDC2 Putative uncharacterized protein DKFZp686L20222          | IPI00026689,IPI00908424                                                                                                                                                                                                                                                 | 34,762.10 | 10 | 20 | IGEGTYGVVYK      | K | G | 1,193.63 |
| 51 | AK1 Adenylate kinase isoenzyme 1                              | IPI00018342,IPI00640817                                                                                                                                                                                                                                                 | 21,617.10 | 10 | 21 | IIFVVGPGGSGK     | K | G | 1,138.67 |
| 52 | CDC2 Putative uncharacterized protein DKFZp686L20222          | IPI00026689,IPI00908424                                                                                                                                                                                                                                                 | 34,762.10 | 10 | 20 | IGEGTYGVVYK      | K | G | 1,193.63 |
| 53 | RPL7 60S ribosomal protein L7                                 | IPI00030179,IPI00472171,IPI00871827,IPI00872387                                                                                                                                                                                                                         | 29,209.70 | 10 | 19 | EVPAVPETLK       | K | K | 1,090.62 |
| 54 | BAX Isoform Epsilon of Apoptosis regulator BAX                | IPI00071059,IPI00443773,IPI00444945,IPI00845474                                                                                                                                                                                                                         | 18,111.40 | 10 | 21 | GGGPTSSEQIMK     | R | T | 1,215.58 |
| 55 | BAX Isoform Epsilon of Apoptosis regulator BAX                | IPI00071059,IPI00443773,IPI00444945,IPI00845474                                                                                                                                                                                                                         | 18,111.40 | 10 | 21 | GGGPTSSEQIMK     | R | T | 1,215.58 |
| 56 | YWHAZ 14-3-3 protein zeta/delta                               | IPI00021263                                                                                                                                                                                                                                                             | 27,727.90 | 10 | 18 | AKLAEQAER        | K | Y | 1,023.57 |
| 57 | YWHAQ 14-3-3 protein theta                                    | IPI00018146                                                                                                                                                                                                                                                             | 27,747.40 | 10 | 18 | AKLAEQAER        | K | Y | 1,023.57 |
| 58 | YWHAZ 14-3-3 protein zeta/delta                               | IPI00021263                                                                                                                                                                                                                                                             | 27,727.90 | 10 | 18 | AKLAEQAER        | K | Y | 1,023.57 |
| 59 | YWHAQ 14-3-3 protein theta                                    | IPI00018146                                                                                                                                                                                                                                                             | 27,747.40 | 10 | 18 | AKLAEQAER        | K | Y | 1,023.57 |
| 60 | YWHAZ 14-3-3 protein zeta/delta                               | IPI00021263                                                                                                                                                                                                                                                             | 27,727.90 | 10 | 18 | AKLAEQAER        | K | Y | 1,023.57 |
| 61 | YWHAQ 14-3-3 protein theta                                    | IPI00018146                                                                                                                                                                                                                                                             | 27,747.40 | 10 | 18 | AKLAEQAER        | K | Y | 1,023.57 |
| 62 | MARCKSL1 MARCKS-related protein                               | IPI00641181                                                                                                                                                                                                                                                             | 19,510.60 | 11 | 25 | GDVTAEEAAGASPAK  | R | A | 1,381.67 |
| 63 | MARCKSL1 MARCKS-related protein                               | IPI00641181                                                                                                                                                                                                                                                             | 19,510.60 | 11 | 25 | GDVTAEEAAGASPAK  | R | A | 1,381.67 |
| 64 | ARF3 ADP-ribosylation factor 3                                | IPI00215917                                                                                                                                                                                                                                                             | 20,583.70 | 11 | 16 | SLIGKK           | K | E | 661.4579 |
| 65 | GRB2 Isoform 1 of Growth factor receptor-bound protein 2      | IPI00021327                                                                                                                                                                                                                                                             | 25,188.80 | 11 | 21 | ATADDELSFKR      | K | G | 1,260.63 |
| 66 | GRB2 Isoform 1 of Growth factor receptor-bound protein 2      | IPI00021327                                                                                                                                                                                                                                                             | 25,188.80 | 11 | 20 | ATADDELSFK       | K | R | 1,104.53 |
| 67 | GRB2 Isoform 1 of Growth factor receptor-bound protein 2      | IPI00021327                                                                                                                                                                                                                                                             | 25,188.80 | 11 | 20 | ATADDELSFK       | K | R | 1,104.53 |
| 68 | RAB1B Ras-related protein Rab-1B                              | IPI00008964,IPI00871366,IPI00896425                                                                                                                                                                                                                                     | 22,154.00 | 11 | 21 | LLLIGDSGVGK      | K | S | 1,079.66 |
| 69 | RAB18 Ras-related protein Rab-18                              | IPI00014577                                                                                                                                                                                                                                                             | 22,959.50 | 11 | 21 | ILIIGESGVGK      | K | S | 1,093.67 |
| 70 | RAB1B Ras-related protein Rab-1B                              | IPI00008964,IPI00871366,IPI00896425                                                                                                                                                                                                                                     | 22,154.00 | 11 | 21 | LLLIGDSGVGK      | K | S | 1,079.66 |
| 71 | RAB18 Ras-related protein Rab-18                              | IPI00014577                                                                                                                                                                                                                                                             | 22,959.50 | 11 | 21 | ILIIGESGVGK      | K | S | 1,093.67 |
| 72 | SLC25A5 ADP/ATP translocase 2                                 | IPI00007188                                                                                                                                                                                                                                                             | 32,878.50 | 11 | 23 | DFLAGGVAAAISK    | K | T | 1,227.68 |
| 73 | SLC25A5 ADP/ATP translocase 2                                 | IPI00007188                                                                                                                                                                                                                                                             | 32,878.50 | 11 | 23 | DFLAGGVAAAISK    | K | T | 1,227.68 |
| 74 | SLC25A5 ADP/ATP translocase 2                                 | IPI00007188                                                                                                                                                                                                                                                             | 32,878.50 | 11 | 23 | DFLAGGVAAAISK    | K | T | 1,227.68 |
| 75 | RAB7A Ras-related protein Rab-7a                              | IPI00016342                                                                                                                                                                                                                                                             | 23,472.00 | 11 | 21 | VIIIGDSGVGK      | K | T | 1,065.64 |
| 76 | SLC25A5 ADP/ATP translocase 2                                 | IPI00007188                                                                                                                                                                                                                                                             | 32,878.50 | 11 | 23 | DFLAGGVAAAISK    | K | T | 1,227.68 |
| 77 | YWHAQ 14-3-3 protein theta                                    | IPI00018146                                                                                                                                                                                                                                                             | 27,747.40 | 12 | 27 | LAEQAERYDDMATCMK | K | A | 1,971.83 |
| 78 | UBB;RPS27A;UBC ubiquitin and ribosomal protein S27a precursor | IPI00179330,IPI00456429,IPI00719280,IPI00743241,IPI00743650,IPI00744274,IPI00784990,IPI00789107,IPI00789823,IPI00790633,IPI00792712,IPI00793330,IPI00793729,IPI00793810,IPI00794211,IPI00794925,IPI00795527,IPI00796007,IPI00796600,IPI00797400,IPI00798127,IPI00798155 | 17,947.60 | 12 | 27 | TITLEVEPSDTIENVK | K | A | 1,795.94 |
| 79 | YWHAQ 14-3-3 protein theta                                    | IPI00018146                                                                                                                                                                                                                                                             | 27,747.40 | 12 | 27 | LAEQAERYDDMATCMK | K | A | 1,971.83 |
| 80 | UBB;RPS27A;UBC ubiquitin and ribosomal protein S27a precursor | IPI00179330,IPI00456429,IPI00719280,IPI00743241,IPI00743650,IPI00744274,IPI00784990,IPI00789107,IPI00789823,IPI00790633,IPI00792712,IPI00793330,IPI00793729,IPI00793810,IPI00794211,IPI00794925,IPI00795527,IPI00796007,IPI00796600,IPI00797400,IPI00798127,IPI00798155 | 17,947.60 | 12 | 27 | TITLEVEPSDTIENVK | K | A | 1,795.94 |
| 81 | UBB;RPS27A;UBC ubiquitin and ribosomal protein S27a precursor | IPI00179330,IPI00456429,IPI00719280,IPI00743241,IPI00743650,IPI00744274,IPI00784990,IPI00789107,IPI00789823,IPI00790633,IPI00792712,IPI00793330,IPI00793729,IPI00793810,IPI00794211,IPI00794925,IPI00795527,IPI00796007,IPI00796600,IPI00797400,IPI00798127,IPI00798155 | 17,947.60 | 12 | 27 | TITLEVEPSDTIENVK | K | A | 1,795.94 |

|     |                                                                      |                                                                                                                                                                                                                                                                         |           |    |    |                      |   |   |          |
|-----|----------------------------------------------------------------------|-------------------------------------------------------------------------------------------------------------------------------------------------------------------------------------------------------------------------------------------------------------------------|-----------|----|----|----------------------|---|---|----------|
| 82  | UBB;RPS27A;UBC ubiquitin and ribosomal protein S27a precursor        | IPI00179330,IPI00456429,IPI00719280,IPI00743241,IPI00743650,IPI00744274,IPI00784990,IPI00789107,IPI00789823,IPI00790633,IPI00792712,IPI00793330,IPI00793729,IPI00793810,IPI00794211,IPI00794925,IPI00795527,IPI00796007,IPI00796600,IPI00797400,IPI00798127,IPI00798155 | 17,947.60 | 12 | 27 | TITLEVEPSDTIENVK     | K | A | 1,795.94 |
| 83  | UBB;RPS27A;UBC ubiquitin and ribosomal protein S27a precursor        | IPI00179330,IPI00456429,IPI00719280,IPI00743241,IPI00743650,IPI00744274,IPI00784990,IPI00789107,IPI00789823,IPI00790633,IPI00792712,IPI00793330,IPI00793729,IPI00793810,IPI00794211,IPI00794925,IPI00795527,IPI00796007,IPI00796600,IPI00797400,IPI00798127,IPI00798155 | 17,947.60 | 12 | 27 | TITLEVEPSDTIENVK     | K | A | 1,795.94 |
| 84  | UBB;RPS27A;UBC ubiquitin and ribosomal protein S27a precursor        | IPI00179330,IPI00456429,IPI00719280,IPI00743241,IPI00743650,IPI00744274,IPI00784990,IPI00789107,IPI00789823,IPI00790633,IPI00792712,IPI00793330,IPI00793729,IPI00793810,IPI00794211,IPI00794925,IPI00795527,IPI00796007,IPI00796600,IPI00797400,IPI00798127,IPI00798155 | 17,947.60 | 12 | 27 | TITLEVEPSDTIENVK     | K | A | 1,795.94 |
| 85  | UBB;RPS27A;UBC ubiquitin and ribosomal protein S27a precursor        | IPI00179330,IPI00456429,IPI00719280,IPI00743241,IPI00743650,IPI00744274,IPI00784990,IPI00789107,IPI00789823,IPI00790633,IPI00792712,IPI00793330,IPI00793729,IPI00793810,IPI00794211,IPI00794925,IPI00795527,IPI00796007,IPI00796600,IPI00797400,IPI00798127,IPI00798155 | 17,947.60 | 12 | 27 | TITLEVEPSDTIENVK     | K | A | 1,795.94 |
| 86  | UBB;RPS27A;UBC ubiquitin and ribosomal protein S27a precursor        | IPI00179330,IPI00456429,IPI00719280,IPI00743241,IPI00743650,IPI00744274,IPI00784990,IPI00789107,IPI00789823,IPI00790633,IPI00792712,IPI00793330,IPI00793729,IPI00793810,IPI00794211,IPI00794925,IPI00795527,IPI00796007,IPI00796600,IPI00797400,IPI00798127,IPI00798155 | 17,947.60 | 12 | 27 | TITLEVEPSDTIENVK     | K | A | 1,795.94 |
| 87  | TCEB2 Transcription elongation factor B polypeptide 2                | IPI00026670,IPI00410162,IPI00917694                                                                                                                                                                                                                                     | 13,115.20 | 12 | 29 | TTIFDAKESSTVFLKLR    | K | I | 2,089.11 |
| 88  | RARS Isoform Complexed of Arginyl-tRNA synthetase, cytoplasmic       | IPI00004860                                                                                                                                                                                                                                                             | 75,364.00 | 12 | 20 | LLQQEEEIK            | R | S | 1,137.62 |
| 89  | YWHAB Isoform Long of 14-3-3 protein beta/alpha                      | IPI00216318,IPI00759832                                                                                                                                                                                                                                                 | 28,065.10 | 12 | 20 | AKLAEQAER            | K | Y | 1,023.57 |
| 90  | YWHAB Isoform Long of 14-3-3 protein beta/alpha                      | IPI00216318,IPI00759832                                                                                                                                                                                                                                                 | 28,065.10 | 12 | 20 | AKLAEQAER            | K | Y | 1,023.57 |
| 91  | YWHAB Isoform Long of 14-3-3 protein beta/alpha                      | IPI00216318,IPI00759832                                                                                                                                                                                                                                                 | 28,065.10 | 12 | 20 | AKLAEQAER            | K | Y | 1,023.57 |
| 92  | YWHAE 14-3-3 protein epsilon                                         | IPI00000816                                                                                                                                                                                                                                                             | 29,157.00 | 13 | 28 | LAEQAERYDEMVESMK     | K | K | 1,968.88 |
| 93  | TXNDC9 Thioredoxin domain-containing protein 9                       | IPI00022386                                                                                                                                                                                                                                                             | 26,517.00 | 13 | 23 | VLEHQLLQTTK          | K | L | 1,317.76 |
| 94  | TXNDC9 Thioredoxin domain-containing protein 9                       | IPI00022386                                                                                                                                                                                                                                                             | 26,517.00 | 13 | 23 | VLEHQLLQTTK          | K | L | 1,317.76 |
| 95  | YWHAE 14-3-3 protein epsilon                                         | IPI00000816                                                                                                                                                                                                                                                             | 29,157.00 | 13 | 29 | LAEQAERYDEMVESMKK    | K | V | 2,104.99 |
| 96  | YWHAE 14-3-3 protein epsilon                                         | IPI00000816                                                                                                                                                                                                                                                             | 29,157.00 | 13 | 29 | LAEQAERYDEMVESMKK    | K | V | 2,104.99 |
| 97  | STIP1 Stress-induced-phosphoprotein 1                                | IPI00013894,IPI00871856                                                                                                                                                                                                                                                 | 62,624.10 | 14 | 32 | ALSVGNIDDALQCYSEAIK  | K | L | 2,075.02 |
| 98  | RAB1A Isoform 1 of Ras-related protein Rab-1A                        | IPI00005719,IPI00873902                                                                                                                                                                                                                                                 | 22,660.40 | 14 | 24 | LLLIGDSGVGK          | K | S | 1,079.66 |
| 99  | RAB11B Ras-related protein Rab-11B                                   | IPI00020436,IPI00429190,IPI00795676                                                                                                                                                                                                                                     | 24,471.00 | 14 | 24 | VVLIGDSGVGK          | K | S | 1,051.62 |
| 100 | RAB11B Ras-related protein Rab-11B                                   | IPI00020436,IPI00429190,IPI00795676                                                                                                                                                                                                                                     | 24,471.00 | 14 | 24 | VVLIGDSGVGK          | K | S | 1,051.62 |
| 101 | TAF9B;LOC728198 Transcription initiation factor TFIID subunit 9B     | IPI00642105                                                                                                                                                                                                                                                             | 27,604.50 | 15 | 24 | DALVMAQILK           | R | D | 1,109.65 |
| 102 | COMMD8 COMM domain-containing protein 8                              | IPI00016447,IPI00871891                                                                                                                                                                                                                                                 | 21,072.90 | 15 | 26 | LPAELGPQLLHK         | K | I | 1,323.79 |
| 103 | ANP32A Acidic leucine-rich nuclear phosphoprotein 32 family member A | IPI00025849                                                                                                                                                                                                                                                             | 28,568.10 | 15 | 28 | TPSDVKELVLDNSR       | R | S | 1,580.84 |
| 104 | NUDT5 ADP-sugar pyrophosphatase                                      | IPI00296913,IPI00646261,IPI00646762,IPI00647797                                                                                                                                                                                                                         | 24,309.80 | 15 | 27 | QYIISEELISEGK        | K | W | 1,516.80 |
| 105 | COPZ1 Coatomer subunit zeta-1                                        | IPI00032851                                                                                                                                                                                                                                                             | 20,180.90 | 15 | 29 | AILILDNDGDRLFAK      | K | Y | 1,681.94 |
| 106 | COPZ1 Coatomer subunit zeta-1                                        | IPI00032851                                                                                                                                                                                                                                                             | 20,180.90 | 15 | 29 | AILILDNDGDRLFAK      | K | Y | 1,681.94 |
| 107 | ENO1 Isoform alpha-enolase of Alpha-enolase                          | IPI00465248                                                                                                                                                                                                                                                             | 47,152.20 | 16 | 28 | GNPTVEVDLFTSK        | R | G | 1,414.73 |
| 108 | ENO1 Isoform alpha-enolase of Alpha-enolase                          | IPI00465248                                                                                                                                                                                                                                                             | 47,152.20 | 16 | 28 | GNPTVEVDLFTSK        | R | G | 1,414.73 |
| 109 | ENO1 Isoform alpha-enolase of Alpha-enolase                          | IPI00465248                                                                                                                                                                                                                                                             | 47,152.20 | 16 | 28 | GNPTVEVDLFTSK        | R | G | 1,414.73 |
| 110 | ENO1 Isoform alpha-enolase of Alpha-enolase                          | IPI00465248                                                                                                                                                                                                                                                             | 47,152.20 | 16 | 28 | GNPTVEVDLFTSK        | R | G | 1,414.73 |
| 111 | RPL23 60S ribosomal protein L23                                      | IPI00010153,IPI00795408                                                                                                                                                                                                                                                 | 14,847.90 | 16 | 35 | ISLGLPVGAVINCADNTGAK | R | N | 1,978.05 |
| 112 | RPL23 60S ribosomal protein L23                                      | IPI00010153,IPI00795408                                                                                                                                                                                                                                                 | 14,847.90 | 16 | 35 | ISLGLPVGAVINCADNTGAK | R | N | 1,978.05 |
| 113 | RPLP0 60S acidic ribosomal protein P0                                | IPI00008530                                                                                                                                                                                                                                                             | 34,256.30 | 17 | 26 | IIQLDDYPK            | K | C | 1,225.69 |
| 114 | RPLP0 60S acidic ribosomal protein P0                                | IPI00008530                                                                                                                                                                                                                                                             | 34,256.30 | 17 | 26 | IIQLDDYPK            | K | C | 1,225.69 |
| 115 | RPLP0 60S acidic ribosomal protein P0                                | IPI00008530                                                                                                                                                                                                                                                             | 34,256.30 | 17 | 26 | IIQLDDYPK            | K | C | 1,225.69 |
| 116 | RPL12 Isoform 1 of 60S ribosomal protein L12                         | IPI00024933                                                                                                                                                                                                                                                             | 17,801.10 | 17 | 31 | CTGGEVGATSALAPK      | R | I | 1,426.71 |
| 117 | RPL12 Isoform 1 of 60S ribosomal protein L12                         | IPI00024933                                                                                                                                                                                                                                                             | 17,801.10 | 17 | 31 | CTGGEVGATSALAPK      | R | I | 1,426.71 |
| 118 | RPL12 Isoform 1 of 60S ribosomal protein L12                         | IPI00024933                                                                                                                                                                                                                                                             | 17,801.10 | 17 | 31 | CTGGEVGATSALAPK      | R | I | 1,426.71 |
| 119 | RPL12 Isoform 1 of 60S ribosomal protein L12                         | IPI00024933                                                                                                                                                                                                                                                             | 17,801.10 | 17 | 31 | CTGGEVGATSALAPK      | R | I | 1,426.71 |
| 120 | YARS Tyrosyl-tRNA synthetase, cytoplasmic                            | IPI00007074                                                                                                                                                                                                                                                             | 59,127.10 | 17 | 26 | NLQEVLGEEK           | R | L | 1,166.61 |
| 121 | RPS19 40S ribosomal protein S19                                      | IPI00215780                                                                                                                                                                                                                                                             | 16,042.50 | 17 | 24 | ALAAFLKK             | R | S | 877.5841 |

|     |                                                                 |                                                             |           |    |    |                   |   |   |          |
|-----|-----------------------------------------------------------------|-------------------------------------------------------------|-----------|----|----|-------------------|---|---|----------|
| 122 | RPS19 40S ribosomal protein S19                                 | IPI00215780                                                 | 16,042.50 | 17 | 24 | ALA AFLKK         | R | S | 877.5841 |
| 123 | CTPS CTP synthase 1                                             | IPI00290142                                                 | 66,672.70 | 17 | 28 | GIASSVGTILK       | K | S | 1,166.72 |
| 124 | AK2 Isoform 1 of Adenylate kinase isoenzyme 2, mitochondrial    | IPI00215901,IPI00218988                                     | 26,461.00 | 18 | 28 | AVLLGPPGAGK       | R | G | 987.6079 |
| 125 | AK2 Isoform 1 of Adenylate kinase isoenzyme 2, mitochondrial    | IPI00215901,IPI00218988                                     | 26,461.00 | 18 | 28 | AVLLGPPGAGK       | R | G | 987.6079 |
| 126 | AK2 Isoform 1 of Adenylate kinase isoenzyme 2, mitochondrial    | IPI00215901,IPI00218988                                     | 26,461.00 | 18 | 28 | AVLLGPPGAGK       | R | G | 987.6079 |
| 127 | AK2 Isoform 1 of Adenylate kinase isoenzyme 2, mitochondrial    | IPI00215901,IPI00218988                                     | 26,461.00 | 18 | 28 | AVLLGPPGAGK       | R | G | 987.6079 |
| 128 | PDLIM1 PDZ and LIM domain protein 1                             | IPI00010414                                                 | 36,053.30 | 18 | 32 | LVGGKDFEQPLAISR   | R | V | 1,637.91 |
| 129 | YWHAQ 14-3-3 protein theta                                      | IPI00018146                                                 | 27,747.40 | 19 | 27 | YDDMATCMK         | R | A | 1,174.43 |
| 130 | YWHAQ 14-3-3 protein theta                                      | IPI00018146                                                 | 27,747.40 | 19 | 27 | YDDMATCMK         | R | A | 1,174.43 |
| 131 | PSMD10 26S proteasome non-ATPase regulatory subunit 10          | IPI00003565,IPI00027699                                     | 24,410.20 | 19 | 30 | LEELKESILADK      | K | S | 1,403.80 |
| 132 | YWHAZ 14-3-3 protein zeta/delta                                 | IPI00021263                                                 | 27,727.90 | 19 | 27 | YDDMAACMK         | R | S | 1,144.42 |
| 133 | YWHAZ 14-3-3 protein zeta/delta                                 | IPI00021263                                                 | 27,727.90 | 19 | 27 | YDDMAACMK         | R | S | 1,144.42 |
| 134 | TCP1 T-complex protein 1 subunit alpha                          | IPI00290566                                                 | 60,327.20 | 19 | 33 | SQNVMMAASIANIVK   | R | S | 1,540.82 |
| 135 | TCP1 T-complex protein 1 subunit alpha                          | IPI00290566                                                 | 60,327.20 | 19 | 33 | SQNVMMAASIANIVK   | R | S | 1,540.82 |
| 136 | PSMB2 Proteasome subunit beta type-2                            | IPI00028006                                                 | 22,819.50 | 20 | 29 | VAASNIVQMK        | R | D | 1,084.59 |
| 137 | TPT1 Tumor protein, translationally-controlled 1                | IPI00009943,IPI00384863,IPI00550900,IPI00908553,IPI00910288 | 21,508.50 | 20 | 34 | IREIADGLCLEVEGK   | K | M | 1,709.90 |
| 138 | YWHAG 14-3-3 protein gamma                                      | IPI00220642                                                 | 28,285.10 | 20 | 28 | YDDMAAMK          | R | N | 1,055.43 |
| 139 | YWHAG 14-3-3 protein gamma                                      | IPI00220642                                                 | 28,285.10 | 20 | 28 | YDDMAAMK          | R | N | 1,055.43 |
| 140 | YWHAG 14-3-3 protein gamma                                      | IPI00220642                                                 | 28,285.10 | 20 | 28 | YDDMAAMK          | R | N | 1,055.43 |
| 141 | PPIA Peptidyl-prolyl cis-trans isomerase A                      | IPI00419585,IPI00887678                                     | 17,994.90 | 20 | 31 | VSFELFADKVPK      | R | T | 1,395.79 |
| 142 | ARF3 ADP-ribosylation factor 3                                  | IPI00215917                                                 | 20,583.70 | 20 | 30 | ILMVGLDAAGK       | R | T | 1,111.63 |
| 143 | PPIA Peptidyl-prolyl cis-trans isomerase A                      | IPI00419585,IPI00887678                                     | 17,994.90 | 20 | 31 | VSFELFADKVPK      | R | T | 1,395.79 |
| 144 | PPIA Peptidyl-prolyl cis-trans isomerase A                      | IPI00419585,IPI00887678                                     | 17,994.90 | 20 | 31 | VSFELFADKVPK      | R | T | 1,395.79 |
| 145 | ARF3 ADP-ribosylation factor 3                                  | IPI00215917                                                 | 20,583.70 | 20 | 30 | ILMVGLDAAGK       | R | T | 1,111.63 |
| 146 | PPIA Peptidyl-prolyl cis-trans isomerase A                      | IPI00419585,IPI00887678                                     | 17,994.90 | 20 | 28 | VSFELFADK         | R | V | 1,063.56 |
| 147 | PPIA Peptidyl-prolyl cis-trans isomerase A                      | IPI00419585,IPI00887678                                     | 17,994.90 | 20 | 28 | VSFELFADK         | R | V | 1,063.56 |
| 148 | PPIA Peptidyl-prolyl cis-trans isomerase A                      | IPI00419585,IPI00887678                                     | 17,994.90 | 20 | 28 | VSFELFADK         | R | V | 1,063.56 |
| 149 | YWHAB Isoform Long of 14-3-3 protein beta/alpha                 | IPI00216318,IPI00759832                                     | 28,065.10 | 21 | 29 | YDDMAAMK          | R | A | 1,055.43 |
| 150 | YWHAB Isoform Long of 14-3-3 protein beta/alpha                 | IPI00216318,IPI00759832                                     | 28,065.10 | 21 | 29 | YDDMAAMK          | R | A | 1,055.43 |
| 151 | YWHAB Isoform Long of 14-3-3 protein beta/alpha                 | IPI00216318,IPI00759832                                     | 28,065.10 | 21 | 29 | YDDMAAMK          | R | A | 1,055.43 |
| 152 | EEF1A1 Elongation factor 1-alpha 1                              | IPI00396485,IPI00472724                                     | 50,123.20 | 21 | 30 | STTTGHLIYK        | K | C | 1,128.61 |
| 153 | EEF1A2 Elongation factor 1-alpha 2                              | IPI00014424                                                 | 50,452.60 | 21 | 30 | STTTGHLIYK        | K | C | 1,128.61 |
| 154 | EEF1A1 Elongation factor 1-alpha 1                              | IPI00396485,IPI00472724                                     | 50,123.20 | 21 | 30 | STTTGHLIYK        | K | C | 1,128.61 |
| 155 | HNRNPA3 Isoform 1 of Heterogeneous nuclear ribonucleoprotein A3 | IPI00419373                                                 | 39,577.10 | 21 | 35 | RGEEGHDPKEPEQLR   | R | K | 1,784.88 |
| 156 | HNRNPA3 Isoform 1 of Heterogeneous nuclear ribonucleoprotein A3 | IPI00419373                                                 | 39,577.10 | 21 | 35 | RGEEGHDPKEPEQLR   | R | K | 1,784.88 |
| 157 | PSMA5 Proteasome subunit alpha type-5                           | IPI00291922                                                 | 26,393.30 | 21 | 32 | LFQVEYAIEAIK      | R | L | 1,431.80 |
| 158 | PSMA5 Proteasome subunit alpha type-5                           | IPI00291922                                                 | 26,393.30 | 21 | 32 | LFQVEYAIEAIK      | R | L | 1,431.80 |
| 159 | CCT3 chaperonin containing TCP1, subunit 3 isoform b            | IPI00290770,IPI00552715,IPI00553185                         | 60,446.30 | 21 | 31 | KVQSGNINAAK       | R | T | 1,145.66 |
| 160 | CCT3 chaperonin containing TCP1, subunit 3 isoform b            | IPI00290770,IPI00552715,IPI00553185                         | 60,446.30 | 21 | 31 | KVQSGNINAAK       | R | T | 1,145.66 |
| 161 | SRP14 Signal recognition particle 14 kDa protein                | IPI00293434                                                 | 14,552.60 | 22 | 31 | TSGSVYITLK        | R | K | 1,076.61 |
| 162 | TPT1 Tumor protein, translationally-controlled 1                | IPI00009943,IPI00384863,IPI00550900,IPI00908553,IPI00910288 | 21,508.50 | 22 | 34 | EIADGLCLEVEGK     | R | M | 1,440.71 |
| 163 | TPT1 Tumor protein, translationally-controlled 1                | IPI00009943,IPI00384863,IPI00550900,IPI00908553,IPI00910288 | 21,508.50 | 22 | 34 | EIADGLCLEVEGK     | R | M | 1,440.71 |
| 164 | NHP2L1 NHP2-like protein 1                                      | IPI00026167,IPI00893746                                     | 14,155.80 | 22 | 33 | LLDLVQSCSNYK      | K | Q | 1,488.76 |
| 165 | ATIC Bifunctional purine biosynthesis protein PURH              | IPI00289499                                                 | 64,598.50 | 23 | 39 | NLTALGLNLVASGGTAK | R | A | 1,607.92 |
| 166 | ATIC Bifunctional purine biosynthesis protein PURH              | IPI00289499                                                 | 64,598.50 | 23 | 39 | NLTALGLNLVASGGTAK | R | A | 1,607.92 |

|     |                                                                                                                         |                                                             |           |    |    |                           |   |   |          |
|-----|-------------------------------------------------------------------------------------------------------------------------|-------------------------------------------------------------|-----------|----|----|---------------------------|---|---|----------|
| 167 | ATIC Bifunctional purine biosynthesis protein PURH                                                                      | IPI00289499                                                 | 64,598.50 | 23 | 39 | NLTALGLNLVASGGTAK         | R | A | 1,607.92 |
| 168 | ATIC Bifunctional purine biosynthesis protein PURH                                                                      | IPI00289499                                                 | 64,598.50 | 23 | 39 | NLTALGLNLVASGGTAK         | R | A | 1,607.92 |
| 169 | NAPA Alpha-soluble NSF attachment protein                                                                               | IPI00009253                                                 | 33,216.10 | 23 | 37 | NSQSFFSGLFGGSSK           | K | I | 1,557.74 |
| 170 | NAPA Alpha-soluble NSF attachment protein                                                                               | IPI00009253                                                 | 33,216.10 | 23 | 37 | NSQSFFSGLFGGSSK           | K | I | 1,557.74 |
| 171 | NAPA Alpha-soluble NSF attachment protein                                                                               | IPI00009253                                                 | 33,216.10 | 23 | 37 | NSQSFFSGLFGGSSK           | K | I | 1,557.74 |
| 172 | NP cDNA FLJ25678 fis, clone TST04067, highly similar to PURINE NUCLEOSIDE PHOSPHORYLASE RUVBL1 Isoform 1 of RuvB-like 1 | IPI00017672,IPI00871140                                     | 32,533.50 | 23 | 41 | HRPQVAICGSLGGLTDK         | K | L | 1,987.06 |
| 173 | RUVBL1 Isoform 1 of RuvB-like 1                                                                                         | IPI00021187                                                 | 50,211.40 | 23 | 33 | GLGLDESGLAK               | K | Q | 1,067.58 |
| 174 | RUVBL1 Isoform 1 of RuvB-like 1                                                                                         | IPI00021187                                                 | 50,211.40 | 23 | 33 | GLGLDESGLAK               | K | Q | 1,067.58 |
| 175 | RUVBL1 Isoform 1 of RuvB-like 1                                                                                         | IPI00021187                                                 | 50,211.40 | 23 | 33 | GLGLDESGLAK               | K | Q | 1,067.58 |
| 176 | RBMX Heterogeneous nuclear ribonucleoprotein G                                                                          | IPI00304692                                                 | 42,315.70 | 23 | 30 | ALEAVFGK                  | K | Y | 842.4862 |
| 177 | RPL9 60S ribosomal protein L9                                                                                           | IPI00031691,IPI00795717                                     | 21,845.70 | 24 | 31 | TVIVKGPR                  | R | G | 877.571  |
| 178 | NPM1 Isoform 1 of Nucleophosmin                                                                                         | IPI00549248                                                 | 32,557.40 | 25 | 45 | ADKDYHFKVDNDENEHQLSL<br>R | K | T | 2,589.23 |
| 179 | NPM1 Isoform 1 of Nucleophosmin                                                                                         | IPI00549248                                                 | 32,557.40 | 25 | 32 | ADKDYHFK                  | K | V | 1,039.52 |
| 180 | GRB2 Isoform 1 of Growth factor receptor-bound protein 2                                                                | IPI00021327                                                 | 25,188.80 | 27 | 38 | VLNEECDQNWYK              | K | A | 1,605.71 |
| 181 | GRB2 Isoform 1 of Growth factor receptor-bound protein 2                                                                | IPI00021327                                                 | 25,188.80 | 27 | 38 | VLNEECDQNWYK              | K | A | 1,605.71 |
| 182 | SNAP23 Isoform SNAP-23a of Synaptosomal-associated protein 23                                                           | IPI00010438                                                 | 23,336.80 | 27 | 40 | ILGLAIESQDAGIK            | R | T | 1,435.82 |
| 183 | SNAP23 Isoform SNAP-23a of Synaptosomal-associated protein 23                                                           | IPI00010438                                                 | 23,336.80 | 27 | 40 | ILGLAIESQDAGIK            | R | T | 1,435.82 |
| 184 | RPL24 60S ribosomal protein L24                                                                                         | IPI00306332,IPI00791426,IPI00793696,IPI00873403             | 17,761.50 | 28 | 35 | VFQFLNAK                  | K | C | 974.5549 |
| 185 | RPS13 40S ribosomal protein S13                                                                                         | IPI00221089                                                 | 17,205.30 | 28 | 39 | LTSDDVKEQIYK              | K | L | 1,454.77 |
| 186 | ALDOA Fructose-bisphosphate aldolase A                                                                                  | IPI00465439,IPI00796333                                     | 39,402.60 | 29 | 42 | GILAADESTGSIK             | K | R | 1,340.71 |
| 187 | RPS19 40S ribosomal protein S19                                                                                         | IPI00215780                                                 | 16,042.50 | 30 | 38 | VPEWVDTVK                 | K | L | 1,080.58 |
| 188 | RPL12 Isoform 1 of 60S ribosomal protein L12                                                                            | IPI00024933                                                 | 17,801.10 | 32 | 40 | IGPLGLSPK                 | K | K | 889.5599 |
| 189 | RPL12 Isoform 1 of 60S ribosomal protein L12                                                                            | IPI00024933                                                 | 17,801.10 | 32 | 40 | IGPLGLSPK                 | K | K | 889.5599 |
| 190 | RPL12 Isoform 1 of 60S ribosomal protein L12                                                                            | IPI00024933                                                 | 17,801.10 | 32 | 40 | IGPLGLSPK                 | K | K | 889.5599 |
| 191 | RPS10 40S ribosomal protein S10                                                                                         | IPI00008438                                                 | 18,880.30 | 32 | 38 | HPELADK                   | K | N | 817.4295 |
| 192 | RPS10 40S ribosomal protein S10                                                                                         | IPI00008438                                                 | 18,880.30 | 32 | 38 | HPELADK                   | K | N | 817.4295 |
| 193 | SLC25A5 ADP/ATP translocase 2                                                                                           | IPI00007188                                                 | 32,878.50 | 32 | 43 | VKLLLQVQHASK              | R | Q | 1,379.87 |
| 194 | EEF2 Elongation factor 2                                                                                                | IPI00186290                                                 | 95,322.10 | 33 | 42 | STLTDLSLVCK               | K | A | 1,131.58 |
| 195 | FSCN1 Fascin                                                                                                            | IPI00163187,IPI00747810                                     | 54,512.30 | 33 | 41 | VNASASSLK                 | K | K | 884.4926 |
| 196 | HIST1H1C Histone H1.2                                                                                                   | IPI00217465,IPI00217466,IPI00217467                         | 21,347.80 | 34 | 46 | KASGPPVSELITK             | R | A | 1,342.79 |
| 197 | PTGES3 Prostaglandin E synthase 3                                                                                       | IPI00015029,IPI00789101,IPI00789698,IPI00790462,IPI00908647 | 18,679.90 | 34 | 48 | SKLTFSCGGSDNFK            | K | H | 1,676.83 |
| 198 | PTGES3 Prostaglandin E synthase 3                                                                                       | IPI00015029,IPI00789101,IPI00789698,IPI00790462,IPI00908647 | 18,679.90 | 34 | 48 | SKLTFSCGGSDNFK            | K | H | 1,676.83 |
| 199 | RPS17 40S ribosomal protein S17                                                                                         | IPI00221093,IPI00791157                                     | 15,532.50 | 34 | 44 | VCEEIAIIPSK               | R | K | 1,266.69 |
| 200 | RPS17 40S ribosomal protein S17                                                                                         | IPI00221093,IPI00791157                                     | 15,532.50 | 34 | 45 | VCEEIAIIPSKK              | R | L | 1,402.79 |
| 201 | DDX5 Probable ATP-dependent RNA helicase DDX5                                                                           | IPI00017617                                                 | 69,131.70 | 34 | 40 | FGNPGEK                   | K | L | 756.3767 |
| 202 | TCP1 T-complex protein 1 subunit alpha                                                                                  | IPI00290566                                                 | 60,327.20 | 34 | 43 | SSLGPVGLDK                | K | M | 980.5504 |
| 203 | TCP1 T-complex protein 1 subunit alpha                                                                                  | IPI00290566                                                 | 60,327.20 | 34 | 43 | SSLGPVGLDK                | K | M | 980.5504 |
| 204 | SLC25A5 ADP/ATP translocase 2                                                                                           | IPI00007188                                                 | 32,878.50 | 34 | 43 | LLLQVQHASK                | K | Q | 1,144.69 |
| 205 | SLC25A5 ADP/ATP translocase 2                                                                                           | IPI00007188                                                 | 32,878.50 | 34 | 43 | LLLQVQHASK                | K | Q | 1,144.69 |
| 206 | SLC25A5 ADP/ATP translocase 2                                                                                           | IPI00007188                                                 | 32,878.50 | 34 | 43 | LLLQVQHASK                | K | Q | 1,144.69 |
| 207 | HIST1H1C Histone H1.2                                                                                                   | IPI00217465,IPI00217466,IPI00217467                         | 21,347.80 | 35 | 46 | ASGPPVSELITK              | K | A | 1,206.68 |
| 208 | HIST1H1C Histone H1.2                                                                                                   | IPI00217465,IPI00217466,IPI00217467                         | 21,347.80 | 35 | 46 | ASGPPVSELITK              | K | A | 1,206.68 |
| 209 | PPP2CA Serine/threonine-protein phosphatase 2A catalytic subunit alpha isoform                                          | IPI00008380                                                 | 35,576.50 | 35 | 41 | AKEILTK                   | K | E | 818.5318 |
| 210 | HIST1H2BL Histone H2B type 1-L                                                                                          | IPI00018534                                                 | 13,934.70 | 35 | 44 | KESYSVYVYK                | R | V | 1,281.67 |
| 211 | PTGES3 Prostaglandin E synthase 3                                                                                       | IPI00015029,IPI00789101,IPI00789698,IPI00790462,IPI00908647 | 18,679.90 | 36 | 48 | LTFSCGGSDNFK              | K | H | 1,453.69 |



|     |                                                                                    |                                      |           |    |    |                      |   |   |          |
|-----|------------------------------------------------------------------------------------|--------------------------------------|-----------|----|----|----------------------|---|---|----------|
| 212 | PSMA7 Isoform 1 of Proteasome subunit alpha type-7                                 | IPI00024175                          | 27,869.10 | 37 | 48 | GRDIVLVGVEKK         | R | S | 1,328.82 |
| 213 | PPIA Peptidyl-prolyl cis-trans isomerase A                                         | IPI00419585,IPI00887678              | 17,994.90 | 38 | 44 | ALSTGEK              | R | G | 713.392  |
| 214 | PPIA Peptidyl-prolyl cis-trans isomerase A                                         | IPI00419585,IPI00887678              | 17,994.90 | 38 | 44 | ALSTGEK              | R | G | 713.392  |
| 215 | PPIA Peptidyl-prolyl cis-trans isomerase A                                         | IPI00419585,IPI00887678              | 17,994.90 | 38 | 49 | ALSTGEKGFQYK         | R | G | 1,273.68 |
| 216 | DHFR Dihydrofolate reductase                                                       | IPI00030357,IPI00887771              | 21,435.30 | 38 | 47 | MTTSSVEGK            | R | Q | 1,064.50 |
| 217 | DHFR Dihydrofolate reductase                                                       | IPI00030357,IPI00887771              | 21,435.30 | 38 | 47 | MTTSSVEGK            | R | Q | 1,064.50 |
| 218 | CLIC1 Chloride intracellular channel protein 1                                     | IPI00010896                          | 26,905.30 | 38 | 49 | GVTFNVTVDTK          | K | R | 1,289.68 |
| 219 | CLIC1 Chloride intracellular channel protein 1                                     | IPI00010896                          | 26,905.30 | 38 | 49 | GVTFNVTVDTK          | K | R | 1,289.68 |
| 220 | RPL11 Isoform 1 of 60S ribosomal protein L11                                       | IPI00376798                          | 20,235.20 | 39 | 52 | VLEQLTGQTPVFSK       | K | A | 1,554.86 |
| 221 | RPL11 Isoform 1 of 60S ribosomal protein L11                                       | IPI00376798                          | 20,235.20 | 39 | 52 | VLEQLTGQTPVFSK       | K | A | 1,554.86 |
| 222 | RAB7A Ras-related protein Rab-7a                                                   | IPI00016342                          | 23,472.00 | 39 | 48 | ATIGADFLTK           | K | E | 1,044.58 |
| 223 | RAB7A Ras-related protein Rab-7a                                                   | IPI00016342                          | 23,472.00 | 39 | 48 | ATIGADFLTK           | K | E | 1,044.58 |
| 224 | AASDHPPT L-aminoadipate-semialdehyde dehydrogenase-phosphopantetheinyl transferase | IPI00250297                          | 35,759.10 | 39 | 47 | SIQPEEKER            | R | I | 1,123.58 |
| 225 | TFRC Transferrin receptor protein 1                                                | IPI00022462                          | 84,855.60 | 40 | 53 | LAVDEENADNNTK        | K | A | 1,569.71 |
| 226 | NUDC Nuclear migration protein nudC                                                | IPI00550746                          | 38,225.70 | 40 | 53 | TDFFIGGEEGMAEK       | K | L | 1,554.69 |
| 227 | PEBP1 Phosphatidylethanolamine-binding protein 1                                   | IPI00219446                          | 21,038.90 | 40 | 47 | VLTPQVK              | K | N | 893.5547 |
| 228 | RPL12 Isoform 1 of 60S ribosomal protein L12                                       | IPI00024933                          | 17,801.10 | 41 | 48 | KVGDDIAK             | K | A | 861.5013 |
| 229 | RPL12 Isoform 1 of 60S ribosomal protein L12                                       | IPI00024933                          | 17,801.10 | 41 | 48 | KVGDDIAK             | K | A | 861.5013 |
| 230 | RPL12 Isoform 1 of 60S ribosomal protein L12                                       | IPI00024933                          | 17,801.10 | 41 | 48 | KVGDDIAK             | K | A | 861.5013 |
| 231 | RPL12 Isoform 1 of 60S ribosomal protein L12                                       | IPI00024933                          | 17,801.10 | 41 | 48 | KVGDDIAK             | K | A | 861.5013 |
| 232 | (Bos taurus) similar to alpha-tubulin I isoform 1                                  | CON_00700865,IPI00387144,IPI00792677 | 50,133.70 | 41 | 60 | TIGGGDDSFNTFFSETGAGK | K | H | 2,015.91 |
| 233 | (Bos taurus) similar to alpha-tubulin I isoform 1                                  | CON_00700865,IPI00387144,IPI00792677 | 50,133.70 | 41 | 60 | TIGGGDDSFNTFFSETGAGK | K | H | 2,015.91 |
| 234 | (Bos taurus) similar to alpha-tubulin I isoform 1                                  | CON_00700865,IPI00387144,IPI00792677 | 50,133.70 | 41 | 60 | TIGGGDDSFNTFFSETGAGK | K | H | 2,015.91 |
| 235 | (Bos taurus) similar to alpha-tubulin I isoform 1                                  | CON_00700865,IPI00387144,IPI00792677 | 50,133.70 | 41 | 60 | TIGGGDDSFNTFFSETGAGK | K | H | 2,015.91 |
| 236 | (Bos taurus) similar to alpha-tubulin I isoform 1                                  | CON_00700865,IPI00387144,IPI00792677 | 50,133.70 | 41 | 60 | TIGGGDDSFNTFFSETGAGK | K | H | 2,015.91 |
| 237 | (Bos taurus) similar to alpha-tubulin I isoform 1                                  | CON_00700865,IPI00387144,IPI00792677 | 50,133.70 | 41 | 60 | TIGGGDDSFNTFFSETGAGK | K | H | 2,015.91 |
| 238 | (Bos taurus) similar to alpha-tubulin I isoform 1                                  | CON_00700865,IPI00387144,IPI00792677 | 50,133.70 | 41 | 60 | TIGGGDDSFNTFFSETGAGK | K | H | 2,015.91 |
| 239 | (Bos taurus) similar to alpha-tubulin I isoform 1                                  | CON_00700865,IPI00387144,IPI00792677 | 50,133.70 | 41 | 60 | TIGGGDDSFNTFFSETGAGK | K | H | 2,015.91 |
| 240 | (Bos taurus) similar to alpha-tubulin I isoform 1                                  | CON_00700865,IPI00387144,IPI00792677 | 50,133.70 | 41 | 60 | TIGGGDDSFNTFFSETGAGK | K | H | 2,015.91 |
| 241 | (Bos taurus) similar to alpha-tubulin I isoform 1                                  | CON_00700865,IPI00387144,IPI00792677 | 50,133.70 | 41 | 60 | TIGGGDDSFNTFFSETGAGK | K | H | 2,015.91 |
| 242 | (Bos taurus) similar to alpha-tubulin I isoform 1                                  | CON_00700865,IPI00387144,IPI00792677 | 50,133.70 | 41 | 60 | TIGGGDDSFNTFFSETGAGK | K | H | 2,015.91 |
| 243 | LRRC59 Leucine-rich repeat-containing protein 59                                   | IPI00396321                          | 34,913.40 | 41 | 50 | ATILDLSCNK           | K | L | 1,142.60 |
| 244 | RPS25 40S ribosomal protein S25                                                    | IPI00012750                          | 13,725.00 | 42 | 52 | DKLNNLVLFDK          | R | A | 1,334.77 |
| 245 | PSMA1 Isoform Short of Proteasome subunit alpha type-1                             | IPI00016832,IPI00472442              | 29,538.00 | 42 | 51 | THAVLVALKR           | K | A | 1,115.71 |
| 246 | RPS25 40S ribosomal protein S25                                                    | IPI00012750                          | 13,725.00 | 42 | 52 | DKLNNLVLFDK          | R | A | 1,334.77 |
| 247 | RPS7 40S ribosomal protein S7                                                      | IPI00013415                          | 22,109.50 | 42 | 49 | ELNITAAK             | R | E | 867.5026 |
| 248 | RPS7 40S ribosomal protein S7                                                      | IPI00013415                          | 22,109.50 | 42 | 49 | ELNITAAK             | R | E | 867.5026 |
| 249 | HSP90AB1 Heat shock protein HSP 90-beta                                            | IPI00414676                          | 83,249.30 | 42 | 53 | ELISNASDALDK         | R | I | 1,283.66 |
| 250 | HSP90AB1 Heat shock protein HSP 90-beta                                            | IPI00414676                          | 83,249.30 | 42 | 53 | ELISNASDALDK         | R | I | 1,283.66 |
| 251 | YWHAZ 14-3-3 protein zeta/delta                                                    | IPI00021263                          | 27,727.90 | 42 | 49 | NLLSVAYK             | R | N | 915.5389 |
| 252 | YWHAQ 14-3-3 protein theta                                                         | IPI00018146                          | 27,747.40 | 42 | 49 | NLLSVAYK             | R | N | 915.5389 |
| 253 | YWHAZ 14-3-3 protein zeta/delta                                                    | IPI00021263                          | 27,727.90 | 42 | 49 | NLLSVAYK             | R | N | 915.5389 |
| 254 | YWHAQ 14-3-3 protein theta                                                         | IPI00018146                          | 27,747.40 | 42 | 49 | NLLSVAYK             | R | N | 915.5389 |
| 255 | YWHAZ 14-3-3 protein zeta/delta                                                    | IPI00021263                          | 27,727.90 | 42 | 49 | NLLSVAYK             | R | N | 915.5389 |
| 256 | YWHAQ 14-3-3 protein theta                                                         | IPI00018146                          | 27,747.40 | 42 | 49 | NLLSVAYK             | R | N | 915.5389 |
| 257 | HSP90AB1 Heat shock protein HSP 90-beta                                            | IPI00414676                          | 83,249.30 | 42 | 55 | ELISNASDALDKIR       | R | Y | 1,552.84 |
| 258 | HSP90AB1 Heat shock protein HSP 90-beta                                            | IPI00414676                          | 83,249.30 | 42 | 55 | ELISNASDALDKIR       | R | Y | 1,552.84 |
| 259 | SRP14 Signal recognition particle 14 kDa protein                                   | IPI00293434                          | 14,552.60 | 43 | 55 | KGTVEGFEPADNK        | K | C | 1,407.71 |
| 260 | SRP14 Signal recognition particle 14 kDa protein                                   | IPI00293434                          | 14,552.60 | 43 | 55 | KGTVEGFEPADNK        | K | C | 1,407.71 |
| 261 | SEC22B Vesicle-trafficking protein SEC22b                                          | IPI00006865                          | 24,723.40 | 43 | 51 | KLNEQSPTR            | R | C | 1,080.59 |

|     |                                                                           |                                                             |           |    |    |                   |   |   |          |
|-----|---------------------------------------------------------------------------|-------------------------------------------------------------|-----------|----|----|-------------------|---|---|----------|
| 262 | RPS13 40S ribosomal protein S13                                           | IPI00221089                                                 | 17,205.30 | 43 | 55 | KGLTPSQIGVILR     | K | D | 1,389.87 |
| 263 | TPI1 Isoform 1 of Triosephosphate isomerase                               | IPI00465028                                                 | 30,772.80 | 43 | 51 | KFFVGGNWK         | R | M | 1,098.61 |
| 264 | YWHAG 14-3-3 protein gamma                                                | IPI00220642                                                 | 28,285.10 | 43 | 50 | NLLSVAYK          | R | N | 915.5389 |
| 265 | YWHAE 14-3-3 protein epsilon                                              | IPI00000816                                                 | 29,157.00 | 43 | 50 | NLLSVAYK          | R | N | 915.5389 |
| 266 | YWHAG 14-3-3 protein gamma                                                | IPI00220642                                                 | 28,285.10 | 43 | 50 | NLLSVAYK          | R | N | 915.5389 |
| 267 | YWHAE 14-3-3 protein epsilon                                              | IPI00000816                                                 | 29,157.00 | 43 | 50 | NLLSVAYK          | R | N | 915.5389 |
| 268 | HN1L Isoform 1 of Hematological and neurological expressed 1-like protein | IPI00027397,IPI00909195                                     | 20,045.60 | 43 | 59 | MASNIFGPTEEPQNIPK | R | R | 1,896.93 |
| 269 | HN1L Isoform 1 of Hematological and neurological expressed 1-like protein | IPI00027397,IPI00909195                                     | 20,045.60 | 43 | 59 | MASNIFGPTEEPQNIPK | R | R | 1,896.93 |
| 270 | YWHAE 14-3-3 protein epsilon                                              | IPI00000816                                                 | 29,157.00 | 43 | 56 | NLLSVAYKNVIGAR    | R | R | 1,525.89 |
| 271 | RPS25 40S ribosomal protein S25                                           | IPI00012750                                                 | 13,725.00 | 44 | 52 | LNMLVLFDK         | K | A | 1,083.63 |
| 272 | SRP14 Signal recognition particle 14 kDa protein                          | IPI00293434                                                 | 14,552.60 | 44 | 55 | GTVEGFEPADNK      | K | C | 1,271.60 |
| 273 | YWHAB Isoform Long of 14-3-3 protein beta/alpha                           | IPI00216318,IPI00759832                                     | 28,065.10 | 44 | 51 | NLLSVAYK          | R | N | 915.5389 |
| 274 | YWHAB Isoform Long of 14-3-3 protein beta/alpha                           | IPI00216318,IPI00759832                                     | 28,065.10 | 44 | 51 | NLLSVAYK          | R | N | 915.5389 |
| 275 | FIS1 Mitochondrial fission 1 protein                                      | IPI00007052                                                 | 16,920.30 | 45 | 53 | SKYNDDIRK         | R | G | 1,154.61 |
| 276 | RPL31 60S ribosomal protein L31                                           | IPI00026302                                                 | 14,445.20 | 45 | 50 | ALKEIR            | R | K | 737.476  |
| 277 | GLUL Glutamine synthetase                                                 | IPI00010130                                                 | 42,046.90 | 46 | 52 | TLDSEPK           | R | C | 797.4132 |
| 278 | GSTP1 Glutathione S-transferase P                                         | IPI00219757                                                 | 23,338.70 | 46 | 55 | ASCLYQLPK         | K | F | 1,144.59 |
| 279 | GSTP1 Glutathione S-transferase P                                         | IPI00219757                                                 | 23,338.70 | 46 | 55 | ASCLYQLPK         | K | F | 1,144.59 |
| 280 | ACTR1A Alpha-centractin                                                   | IPI00029468,IPI00908883                                     | 42,597.20 | 47 | 61 | VMAGALEGDIFIGPK   | R | A | 1,541.81 |
| 281 | ACTR1A Alpha-centractin                                                   | IPI00029468,IPI00908883                                     | 42,597.20 | 47 | 61 | VMAGALEGDIFIGPK   | R | A | 1,541.81 |
| 282 | OCIAD1 Isoform 1 of OCIA domain-containing protein 1                      | IPI00016405                                                 | 27,608.80 | 47 | 64 | SVPLAATSMITQGLISK | R | G | 1,854.05 |
| 283 | OCIAD1 Isoform 1 of OCIA domain-containing protein 1                      | IPI00016405                                                 | 27,608.80 | 47 | 64 | SVPLAATSMITQGLISK | R | G | 1,838.05 |
| 284 | OCIAD1 Isoform 1 of OCIA domain-containing protein 1                      | IPI00016405                                                 | 27,608.80 | 47 | 64 | SVPLAATSMITQGLISK | R | G | 1,854.05 |
| 285 | DNAJA1 DnaJ homolog subfamily A member 1                                  | IPI00012535                                                 | 44,850.60 | 47 | 59 | QISQAYEVLSDAK     | K | K | 1,459.75 |
| 286 | TUBB Tubulin beta chain                                                   | IPI00011654                                                 | 49,652.60 | 47 | 58 | ISVYYNEATGGK      | R | Y | 1,309.65 |
| 287 | TUBB Tubulin beta chain                                                   | IPI00011654                                                 | 49,652.60 | 47 | 58 | ISVYYNEATGGK      | R | Y | 1,309.65 |
| 288 | TUBB2C Tubulin beta-2C chain                                              | IPI00007752                                                 | 49,812.70 | 47 | 58 | INVYYNEATGGK      | R | Y | 1,336.66 |
| 289 | TUBB Tubulin beta chain                                                   | IPI00011654                                                 | 49,652.60 | 47 | 58 | ISVYYNEATGGK      | R | Y | 1,309.65 |
| 290 | TUBB2C Tubulin beta-2C chain                                              | IPI00007752                                                 | 49,812.70 | 47 | 58 | INVYYNEATGGK      | R | Y | 1,336.66 |
| 291 | TUBB Tubulin beta chain                                                   | IPI00011654                                                 | 49,652.60 | 47 | 58 | ISVYYNEATGGK      | R | Y | 1,309.65 |
| 292 | TUBB Tubulin beta chain                                                   | IPI00011654                                                 | 49,652.60 | 47 | 58 | ISVYYNEATGGK      | R | Y | 1,309.65 |
| 293 | TUBB2B Tubulin beta-2B chain                                              | IPI00031370                                                 | 49,935.10 | 47 | 58 | INVYYNEATGNK      | R | Y | 1,393.68 |
| 294 | TUBB Tubulin beta chain                                                   | IPI00011654                                                 | 49,652.60 | 47 | 58 | ISVYYNEATGGK      | R | Y | 1,309.65 |
| 295 | HIST1H2BL Histone H2B type 1-L                                            | IPI00018534                                                 | 13,934.70 | 48 | 58 | QVHPDTGISSK       | K | A | 1,176.61 |
| 296 | HIST1H2BL Histone H2B type 1-L                                            | IPI00018534                                                 | 13,934.70 | 48 | 58 | QVHPDTGISSK       | K | A | 1,176.61 |
| 297 | DNAJB6 Isoform A of DnaJ homolog subfamily B member 6                     | IPI00024523,IPI00098523,IPI00556073,IPI00910456             | 26,882.70 | 48 | 60 | QVAEAYEVLSDAK     | K | K | 1,430.73 |
| 298 | DNAJB6 Isoform A of DnaJ homolog subfamily B member 6                     | IPI00024523,IPI00098523,IPI00556073,IPI00910456             | 36,070.20 | 48 | 60 | QVAEAYEVLSDAK     | K | K | 1,430.73 |
| 299 | PEBP1 Phosphatidylethanolamine-binding protein 1                          | IPI00219446                                                 | 21,038.90 | 48 | 62 | NRPTSISWDGLDSGK   | K | L | 1,640.81 |
| 300 | PEBP1 Phosphatidylethanolamine-binding protein 1                          | IPI00219446                                                 | 21,038.90 | 48 | 62 | NRPTSISWDGLDSGK   | K | L | 1,640.81 |
| 301 | PTGES3 Prostaglandin E synthase 3                                         | IPI00015029,IPI00789101,IPI00789698,IPI00790462,IPI00908647 | 18,679.90 | 49 | 65 | HLNEIDLFHCIDPNDSK | K | H | 2,074.97 |
| 302 | RBMX Heterogeneous nuclear ribonucleoprotein G                            | IPI00304692                                                 | 42,315.70 | 50 | 63 | GFAFVTFESPADAK    | R | D | 1,494.74 |
| 303 | RBMX Heterogeneous nuclear ribonucleoprotein G                            | IPI00304692                                                 | 42,315.70 | 50 | 63 | GFAFVTFESPADAK    | R | D | 1,494.74 |
| 304 | RBMX Heterogeneous nuclear ribonucleoprotein G                            | IPI00304692                                                 | 42,315.70 | 50 | 63 | GFAFVTFESPADAK    | R | D | 1,494.74 |
| 305 | RBMX Heterogeneous nuclear ribonucleoprotein G                            | IPI00304692                                                 | 42,315.70 | 50 | 63 | GFAFVTFESPADAK    | R | D | 1,494.74 |
| 306 | RBMX Heterogeneous nuclear ribonucleoprotein G                            | IPI00304692                                                 | 42,315.70 | 50 | 63 | GFAFVTFESPADAK    | R | D | 1,494.74 |
| 307 | RBMX Heterogeneous nuclear ribonucleoprotein G                            | IPI00304692                                                 | 42,315.70 | 50 | 63 | GFAFVTFESPADAK    | R | D | 1,494.74 |
| 308 | RBMX Heterogeneous nuclear ribonucleoprotein G                            | IPI00304692                                                 | 42,315.70 | 50 | 63 | GFAFVTFESPADAK    | R | D | 1,494.74 |

|     |                                                                           |                                                                                                                                                                                                                                                                         |           |    |    |                           |   |   |          |
|-----|---------------------------------------------------------------------------|-------------------------------------------------------------------------------------------------------------------------------------------------------------------------------------------------------------------------------------------------------------------------|-----------|----|----|---------------------------|---|---|----------|
| 309 | SNRNP2 U2 small nuclear ribonucleoprotein B"                              | IPI00029267                                                                                                                                                                                                                                                             | 25,469.50 | 50 | 57 | GQAFVIFK                  | R | E | 917.5335 |
| 310 | SNRNP2 U2 small nuclear ribonucleoprotein B"                              | IPI00029267                                                                                                                                                                                                                                                             | 25,469.50 | 50 | 57 | GQAFVIFK                  | R | E | 917.5335 |
| 311 | SNRNP2 U2 small nuclear ribonucleoprotein B"                              | IPI00029267                                                                                                                                                                                                                                                             | 25,469.50 | 50 | 57 | GQAFVIFK                  | R | E | 917.5335 |
| 312 | HNRNPH1 Heterogeneous nuclear ribonucleoprotein H                         | IPI00013881,IPI00479191                                                                                                                                                                                                                                                 | 49,211.80 | 50 | 68 | EGRPSGEAFVELESEDEVK       | R | L | 2,115.00 |
| 313 | HNRNPH1 Heterogeneous nuclear ribonucleoprotein H                         | IPI00013881,IPI00479191                                                                                                                                                                                                                                                 | 49,211.80 | 50 | 68 | EGRPSGEAFVELESEDEVK       | R | L | 2,115.00 |
| 314 | HNRNPH1 Heterogeneous nuclear ribonucleoprotein H                         | IPI00013881,IPI00479191                                                                                                                                                                                                                                                 | 49,211.80 | 50 | 68 | EGRPSGEAFVELESEDEVK       | R | L | 2,115.00 |
| 315 | RPS16 40S ribosomal protein S16                                           | IPI00221092                                                                                                                                                                                                                                                             | 16,427.90 | 51 | 60 | LLEPVLLL GK               | K | E | 1,102.73 |
| 316 | RPS16 40S ribosomal protein S16                                           | IPI00221092                                                                                                                                                                                                                                                             | 16,427.90 | 51 | 60 | LLEPVLLL GK               | K | E | 1,102.73 |
| 317 | ACTG1 Actin, cytoplasmic 2                                                | IPI00021440                                                                                                                                                                                                                                                             | 41,775.90 | 51 | 62 | DSYVGDEA QSKR             | K | G | 1,362.64 |
| 318 | ACTG1 Actin, cytoplasmic 2                                                | IPI00021440                                                                                                                                                                                                                                                             | 41,775.90 | 51 | 62 | DSYVGDEA QSKR             | K | G | 1,362.64 |
| 319 | CACYBP Isoform 1 of Calcyclin-binding protein                             | IPI00395627,IPI00552308                                                                                                                                                                                                                                                 | 26,192.30 | 51 | 74 | KAELLDNEKPAAVVAPITGGYTKVK | K | I | 2,552.44 |
| 320 | PSAT1 cDNA FLJ56437, highly similar to Phosphoserine aminotransferase     | IPI00001734                                                                                                                                                                                                                                                             | 45,338.10 | 51 | 61 | QVWNFGPGPAK               | R | L | 1,121.62 |
| 321 | ACTG1 Actin, cytoplasmic 2                                                | IPI00021440                                                                                                                                                                                                                                                             | 41,775.90 | 51 | 61 | DSYVGDEA QSK              | K | R | 1,206.54 |
| 322 | ACTG1 Actin, cytoplasmic 2                                                | IPI00021440                                                                                                                                                                                                                                                             | 41,775.90 | 51 | 61 | DSYVGDEA QSK              | K | R | 1,206.54 |
| 323 | MAGOHB Protein mago nashi homolog 2                                       | IPI00059292,IPI00219306                                                                                                                                                                                                                                                 | 17,258.60 | 51 | 56 | EAYVHK                    | K | S | 754.3973 |
| 324 | PDZD11 Isoform 1 of PDZ domain-containing protein 11                      | IPI00550841,IPI00641523                                                                                                                                                                                                                                                 | 16,113.50 | 52 | 63 | KPPGAQLGFNIR              | K | G | 1,305.75 |
| 325 | RPL23 60S ribosomal protein L23                                           | IPI00010153,IPI00795408                                                                                                                                                                                                                                                 | 14,847.90 | 52 | 66 | LPAAGVGDMMATVK            | R | K | 1,499.77 |
| 326 | AK2 Isoform 1 of Adenylate kinase isoenzyme 2, mitochondrial              | IPI00215901,IPI00218988                                                                                                                                                                                                                                                 | 26,461.00 | 52 | 62 | AMVASGSELGK               | R | K | 1,073.54 |
| 327 | RPL23 60S ribosomal protein L23                                           | IPI00010153,IPI00795408                                                                                                                                                                                                                                                 | 14,847.90 | 52 | 66 | LPAAGVGDMMATVK            | R | K | 1,499.77 |
| 328 | AK2 Isoform 1 of Adenylate kinase isoenzyme 2, mitochondrial              | IPI00215901,IPI00218988                                                                                                                                                                                                                                                 | 26,461.00 | 52 | 63 | AMVASGSELGKK              | R | L | 1,209.65 |
| 329 | AK2 Isoform 1 of Adenylate kinase isoenzyme 2, mitochondrial              | IPI00215901,IPI00218988                                                                                                                                                                                                                                                 | 26,461.00 | 52 | 63 | AMVASGSELGKK              | R | L | 1,209.65 |
| 330 | TIMM23 Mitochondrial import inner membrane translocase subunit Tim23      | IPI00007309                                                                                                                                                                                                                                                             | 21,926.20 | 52 | 68 | YLVQDTEFILPTGANK          | R | T | 1,931.98 |
| 331 | TIMM23 Mitochondrial import inner membrane translocase subunit Tim23      | IPI00007309                                                                                                                                                                                                                                                             | 21,926.20 | 52 | 68 | YLVQDTEFILPTGANK          | R | T | 1,931.98 |
| 332 | HNRNPF Heterogeneous nuclear ribonucleoprotein F                          | IPI00003881                                                                                                                                                                                                                                                             | 45,653.80 | 53 | 68 | QSGEAFVELGSEDDVK          | R | M | 1,717.80 |
| 333 | HNRNPF Heterogeneous nuclear ribonucleoprotein F                          | IPI00003881                                                                                                                                                                                                                                                             | 45,653.80 | 53 | 68 | QSGEAFVELGSEDDVK          | R | M | 1,717.80 |
| 334 | HNRNPF Heterogeneous nuclear ribonucleoprotein F                          | IPI00003881                                                                                                                                                                                                                                                             | 45,653.80 | 53 | 68 | QSGEAFVELGSEDDVK          | R | M | 1,717.80 |
| 335 | SERBP1 Isoform 1 of Plasminogen activator inhibitor 1 RNA-binding protein | IPI00410693,IPI00412714,IPI00470497,IPI00470498                                                                                                                                                                                                                         | 44,947.80 | 53 | 68 | SAAQAAAQTSNAAGK           | K | Q | 1,468.72 |
| 336 | FIS1 Mitochondrial fission 1 protein                                      | IPI00007052                                                                                                                                                                                                                                                             | 16,920.30 | 54 | 64 | GIVLLELLPK                | K | G | 1,231.78 |
| 337 | FIS1 Mitochondrial fission 1 protein                                      | IPI00007052                                                                                                                                                                                                                                                             | 16,920.30 | 54 | 64 | GIVLLELLPK                | K | G | 1,231.78 |
| 338 | PSMA5 Proteasome subunit alpha type-5                                     | IPI00291922                                                                                                                                                                                                                                                             | 26,393.30 | 54 | 66 | ITSPLEMPSSIEK             | R | I | 1,455.75 |
| 339 | HIST1H1C Histone H1.2                                                     | IPI00217465,IPI00217466,IPI00217467                                                                                                                                                                                                                                     | 21,347.80 | 55 | 64 | SGVSLAALKK                | R | A | 989.6325 |
| 340 | HIST1H1C Histone H1.2                                                     | IPI00217465,IPI00217466,IPI00217467                                                                                                                                                                                                                                     | 21,347.80 | 55 | 64 | SGVSLAALKK                | R | A | 989.6325 |
| 341 | UBB;RPS27A;UBC ubiquitin and ribosomal protein S27a precursor             | IPI00179330,IPI00456429,IPI00719280,IPI00743241,IPI00743650,IPI00744274,IPI00784990,IPI00789107,IPI00789823,IPI00790633,IPI00792712,IPI00793330,IPI00793729,IPI00793810,IPI00794211,IPI00794925,IPI00795527,IPI00796007,IPI00796600,IPI00797400,IPI00798127,IPI00798155 | 17,947.60 | 55 | 63 | TLSDYNIQK                 | R | E | 1,089.57 |
| 342 | UBB;RPS27A;UBC ubiquitin and ribosomal protein S27a precursor             | IPI00179330,IPI00456429,IPI00719280,IPI00743241,IPI00743650,IPI00744274,IPI00784990,IPI00789107,IPI00789823,IPI00790633,IPI00792712,IPI00793330,IPI00793729,IPI00793810,IPI00794211,IPI00794925,IPI00795527,IPI00796007,IPI00796600,IPI00797400,IPI00798127,IPI00798155 | 17,947.60 | 55 | 63 | TLSDYNIQK                 | R | E | 1,089.57 |
| 343 | HNRNPH3 Isoform 1 of Heterogeneous nuclear ribonucleoprotein H3           | IPI00013877,IPI00216492                                                                                                                                                                                                                                                 | 36,909.60 | 56 | 67 | STGEAFVQFASK              | R | E | 1,279.64 |
| 344 | HNRNPH3 Isoform 1 of Heterogeneous nuclear ribonucleoprotein H3           | IPI00013877,IPI00216492                                                                                                                                                                                                                                                 | 36,909.60 | 56 | 67 | STGEAFVQFASK              | R | E | 1,279.64 |
| 345 | HNRNPH3 Isoform 1 of Heterogeneous nuclear ribonucleoprotein H3           | IPI00013877,IPI00216492                                                                                                                                                                                                                                                 | 36,909.60 | 56 | 67 | STGEAFVQFASK              | R | E | 1,279.64 |

|     |                                                                  |                          |            |    |    |                      |   |   |          |
|-----|------------------------------------------------------------------|--------------------------|------------|----|----|----------------------|---|---|----------|
| 346 | HNRNPH3 Isoform 1 of Heterogeneous nuclear ribonucleoprotein H3  | IPI00013877,IPI000216492 | 36,909.60  | 56 | 67 | STGEAFVQFASK         | R | E | 1,279.64 |
| 347 | HSP90AB1 Heat shock protein HSP 90-beta                          | IPI00414676              | 83,249.30  | 56 | 69 | YESLTDPSKLDGSK       | R | E | 1,555.78 |
| 348 | CCT7 T-complex protein 1 subunit eta                             | IPI00018465              | 59,349.80  | 56 | 67 | ATISNDGATILK         | K | L | 1,211.67 |
| 349 | CCT7 T-complex protein 1 subunit eta                             | IPI00018465              | 59,349.80  | 56 | 67 | ATISNDGATILK         | K | L | 1,211.67 |
| 350 | CCT7 T-complex protein 1 subunit eta                             | IPI00018465              | 59,349.80  | 56 | 67 | ATISNDGATILK         | K | L | 1,211.67 |
| 351 | GNPNAT1 Glucosamine 6-phosphate N-acetyltransferase              | IPI00061525              | 20,731.30  | 56 | 73 | VLGQLTETGVVSPEQFMK   | K | S | 1,987.03 |
| 352 | GNPNAT1 Glucosamine 6-phosphate N-acetyltransferase              | IPI00061525              | 20,731.30  | 56 | 73 | VLGQLTETGVVSPEQFMK   | K | S | 1,987.03 |
| 353 | TCEA1 Isoform 1 of Transcription elongation factor A protein 1   | IPI00333215              | 33,952.60  | 56 | 67 | QSTDEEVTSLAK         | K | S | 1,315.65 |
| 354 | TPI1 Isoform 1 of Triosephosphate isomerase                      | IPI00465028              | 30,772.80  | 56 | 70 | KQSLGELIGTLNAAK      | R | V | 1,558.91 |
| 355 | TPI1 Isoform 1 of Triosephosphate isomerase                      | IPI00465028              | 30,772.80  | 56 | 70 | KQSLGELIGTLNAAK      | R | V | 1,558.91 |
| 356 | TPI1 Isoform 1 of Triosephosphate isomerase                      | IPI00465028              | 30,772.80  | 56 | 70 | KQSLGELIGTLNAAK      | R | V | 1,558.91 |
| 357 | HSPA8 Isoform 1 of Heat shock cognate 71 kDa protein             | IPI00003865              | 70,881.80  | 57 | 71 | NQVAMNPTNTVFDK       | K | R | 1,673.80 |
| 358 | HSPA1A;HSPA1B Heat shock 70 kDa protein 1                        | IPI00304925              | 70,036.00  | 57 | 71 | NQVALNPQNTVFDK       | K | R | 1,666.86 |
| 359 | HSPA8 Isoform 1 of Heat shock cognate 71 kDa protein             | IPI00003865              | 70,881.80  | 57 | 71 | NQVAMNPTNTVFDK       | K | R | 1,673.80 |
| 360 | HSPA8 Isoform 1 of Heat shock cognate 71 kDa protein             | IPI00003865              | 70,881.80  | 57 | 71 | NQVAMNPTNTVFDK       | K | R | 1,673.80 |
| 361 | HSPA8 Isoform 1 of Heat shock cognate 71 kDa protein             | IPI00003865              | 70,881.80  | 57 | 71 | NQVAMNPTNTVFDK       | K | R | 1,673.80 |
| 362 | HSPA1A;HSPA1B Heat shock 70 kDa protein 1                        | IPI00304925              | 70,036.00  | 57 | 71 | NQVALNPQNTVFDK       | K | R | 1,666.86 |
| 363 | RPL18A 60S ribosomal protein L18a                                | IPI00026202              | 20,744.60  | 57 | 70 | SSGEIVYCGQVFEK       | K | S | 1,610.76 |
| 364 | RPL18A 60S ribosomal protein L18a                                | IPI00026202              | 20,744.60  | 57 | 70 | SSGEIVYCGQVFEK       | K | S | 1,610.76 |
| 365 | TPI1 Isoform 1 of Triosephosphate isomerase                      | IPI00465028              | 30,772.80  | 57 | 70 | QSLGELIGTLNAAK       | K | V | 1,422.80 |
| 366 | TPI1 Isoform 1 of Triosephosphate isomerase                      | IPI00465028              | 30,772.80  | 57 | 70 | QSLGELIGTLNAAK       | K | V | 1,422.80 |
| 367 | TPI1 Isoform 1 of Triosephosphate isomerase                      | IPI00465028              | 30,772.80  | 57 | 70 | QSLGELIGTLNAAK       | K | V | 1,422.80 |
| 368 | TPI1 Isoform 1 of Triosephosphate isomerase                      | IPI00465028              | 30,772.80  | 57 | 70 | QSLGELIGTLNAAK       | K | V | 1,422.80 |
| 369 | TPI1 Isoform 1 of Triosephosphate isomerase                      | IPI00465028              | 30,772.80  | 57 | 70 | QSLGELIGTLNAAK       | K | V | 1,422.80 |
| 370 | RNASEH2A Ribonuclease H2 subunit A                               | IPI00290192              | 33,377.00  | 57 | 64 | LADLEALK             | R | V | 880.5231 |
| 371 | PCBP1 Poly(rC)-binding protein 1                                 | IPI00016610              | 37,480.20  | 58 | 70 | IITLTGPTNAIFK        | R | A | 1,396.83 |
| 372 | PCBP1 Poly(rC)-binding protein 1                                 | IPI00016610              | 37,480.20  | 58 | 70 | IITLTGPTNAIFK        | R | A | 1,396.83 |
| 373 | PCBP2 Poly(rC)-binding protein 2                                 | IPI00216689,IPI00796337  | 38,562.90  | 58 | 70 | IITLAGPTNAIFK        | R | A | 1,366.82 |
| 374 | PCBP1 Poly(rC)-binding protein 1                                 | IPI00016610              | 37,480.20  | 58 | 70 | IITLTGPTNAIFK        | R | A | 1,396.83 |
| 375 | PCBP1 Poly(rC)-binding protein 1                                 | IPI00016610              | 37,480.20  | 58 | 70 | IITLTGPTNAIFK        | R | A | 1,396.83 |
| 376 | PCBP1 Poly(rC)-binding protein 1                                 | IPI00016610              | 37,480.20  | 58 | 70 | IITLTGPTNAIFK        | R | A | 1,396.83 |
| 377 | PCBP1 Poly(rC)-binding protein 1                                 | IPI00016610              | 37,480.20  | 58 | 70 | IITLTGPTNAIFK        | R | A | 1,396.83 |
| 378 | PCBP2 Poly(rC)-binding protein 2                                 | IPI00216689,IPI00796337  | 38,562.90  | 58 | 70 | IITLAGPTNAIFK        | R | A | 1,366.82 |
| 379 | EIF5A Isoform 2 of Eukaryotic translation initiation factor 5A-1 | IPI00376005,IPI00411704  | 20,152.80  | 58 | 64 | NGFVVLK              | K | G | 784.4807 |
| 380 | EIF5A Isoform 2 of Eukaryotic translation initiation factor 5A-1 | IPI00376005,IPI00411704  | 20,152.80  | 58 | 64 | NGFVVLK              | K | G | 784.4807 |
| 381 | RPS7 40S ribosomal protein S7                                    | IPI00013415              | 22,109.50  | 58 | 70 | KAIIFVVPVQLK         | R | S | 1,481.98 |
| 382 | FAM32A Protein FAM32A                                            | IPI00022402              | 13,160.80  | 59 | 67 | TPAQAAFEK            | R | M | 970.5084 |
| 383 | RPS7 40S ribosomal protein S7                                    | IPI00013415              | 22,109.50  | 59 | 70 | AIIIFVVPVQLK         | K | S | 1,345.87 |
| 384 | RPS7 40S ribosomal protein S7                                    | IPI00013415              | 22,109.50  | 59 | 70 | AIIIFVVPVQLK         | K | S | 1,345.87 |
| 385 | RPS7 40S ribosomal protein S7                                    | IPI00013415              | 22,109.50  | 59 | 70 | AIIIFVVPVQLK         | K | S | 1,345.87 |
| 386 | RPS7 40S ribosomal protein S7                                    | IPI00013415              | 22,109.50  | 59 | 70 | AIIIFVVPVQLK         | K | S | 1,345.87 |
| 387 | RPS7 40S ribosomal protein S7                                    | IPI00013415              | 22,109.50  | 59 | 70 | AIIIFVVPVQLK         | K | S | 1,345.87 |
| 388 | ARF3 ADP-ribosylation factor 3                                   | IPI00215917              | 20,583.70  | 60 | 73 | NISFTVWDVGGQDK       | K | I | 1,573.77 |
| 389 | ARF3 ADP-ribosylation factor 3                                   | IPI00215917              | 20,583.70  | 60 | 73 | NISFTVWDVGGQDK       | K | I | 1,573.77 |
| 390 | FASN Fatty acid synthase                                         | IPI00026781              | 273,382.00 | 60 | 70 | FDASFFGVHPK          | R | Q | 1,259.63 |
| 391 | ILF2 Interleukin enhancer-binding factor 2                       | IPI00005198,IPI000872107 | 43,044.70  | 61 | 80 | NQDLAPNSAEQASILSLVTK | R | I | 2,107.11 |

|     |                                                             |                                                 |           |    |    |                      |   |   |          |
|-----|-------------------------------------------------------------|-------------------------------------------------|-----------|----|----|----------------------|---|---|----------|
| 392 | ILF2 Interleukin enhancer-binding factor 2                  | IPI00005198,IPI00872107                         | 43,044.70 | 61 | 80 | NQDLAPNSAEQASILSLVTK | R | I | 2,107.11 |
| 393 | YWHAZ 14-3-3 protein zeta/delta                             | IPI00021263                                     | 27,727.90 | 61 | 74 | VVSSIEQKTEGAEK       | R | K | 1,520.81 |
| 394 | YWHAQ 14-3-3 protein theta                                  | IPI00018146                                     | 27,747.40 | 61 | 68 | VISSIEQK             | R | T | 911.5288 |
| 395 | YWHAQ 14-3-3 protein theta                                  | IPI00018146                                     | 27,747.40 | 61 | 68 | VISSIEQK             | R | T | 911.5288 |
| 396 | YWHAZ 14-3-3 protein zeta/delta                             | IPI00021263                                     | 27,727.90 | 61 | 68 | VVSSIEQK             | R | T | 897.5131 |
| 397 | YWHAQ 14-3-3 protein theta                                  | IPI00018146                                     | 27,747.40 | 61 | 68 | VISSIEQK             | R | T | 911.5288 |
| 398 | YWHAQ 14-3-3 protein theta                                  | IPI00018146                                     | 27,747.40 | 61 | 68 | VISSIEQK             | R | T | 911.5288 |
| 399 | YWHAZ 14-3-3 protein zeta/delta                             | IPI00021263                                     | 27,727.90 | 61 | 68 | VVSSIEQK             | R | T | 897.5131 |
| 400 | YWHAQ 14-3-3 protein theta                                  | IPI00018146                                     | 27,747.40 | 61 | 68 | VISSIEQK             | R | T | 911.5288 |
| 401 | YWHAE 14-3-3 protein epsilon                                | IPI00000816                                     | 29,157.00 | 62 | 69 | IISSIEQK             | R | E | 925.5445 |
| 402 | YWHAE 14-3-3 protein epsilon                                | IPI00000816                                     | 29,157.00 | 62 | 69 | IISSIEQK             | R | E | 925.5445 |
| 403 | YWHAE 14-3-3 protein epsilon                                | IPI00000816                                     | 29,157.00 | 62 | 73 | IISSIEQKKEENK        | R | G | 1,433.78 |
| 404 | YWHAG 14-3-3 protein gamma                                  | IPI00220642                                     | 28,285.10 | 62 | 69 | VISSIEQK             | R | T | 911.5288 |
| 405 | YWHAG 14-3-3 protein gamma                                  | IPI00220642                                     | 28,285.10 | 62 | 69 | VISSIEQK             | R | T | 911.5288 |
| 406 | YWHAH 14-3-3 protein eta                                    | IPI00216319                                     | 28,201.60 | 62 | 69 | VISSIEQK             | R | T | 911.5288 |
| 407 | YWHAG 14-3-3 protein gamma                                  | IPI00220642                                     | 28,285.10 | 62 | 69 | VISSIEQK             | R | T | 911.5288 |
| 408 | YWHAH 14-3-3 protein eta                                    | IPI00216319                                     | 28,201.60 | 62 | 69 | VISSIEQK             | R | T | 911.5288 |
| 409 | YWHAG 14-3-3 protein gamma                                  | IPI00220642                                     | 28,285.10 | 62 | 69 | VISSIEQK             | R | T | 911.5288 |
| 410 | RPS5 40S ribosomal protein S5                               | IPI00008433                                     | 22,859.00 | 63 | 71 | KAQCPIVER            | R | L | 1,108.60 |
| 411 | RPS5 40S ribosomal protein S5                               | IPI00008433                                     | 22,859.00 | 63 | 71 | KAQCPIVER            | R | L | 1,108.60 |
| 412 | PSMB2 Proteasome subunit beta type-2                        | IPI00028006                                     | 22,819.50 | 63 | 68 | NVQLYK               | K | M | 772.4443 |
| 413 | YWHAB Isoform Long of 14-3-3 protein beta/alpha             | IPI00216318,IPI00759832                         | 28,065.10 | 63 | 70 | VISSIEQK             | R | T | 911.5288 |
| 414 | YWHAB Isoform Long of 14-3-3 protein beta/alpha             | IPI00216318,IPI00759832                         | 28,065.10 | 63 | 70 | VISSIEQK             | R | T | 911.5288 |
| 415 | YWHAB Isoform Long of 14-3-3 protein beta/alpha             | IPI00216318,IPI00759832                         | 28,065.10 | 63 | 70 | VISSIEQK             | R | T | 911.5288 |
| 416 | YWHAB Isoform Long of 14-3-3 protein beta/alpha             | IPI00216318,IPI00759832                         | 28,065.10 | 63 | 70 | VISSIEQK             | R | T | 911.5288 |
| 417 | UBE2S Ubiquitin-conjugating enzyme E2 S                     | IPI00217949                                     | 23,828.40 | 64 | 76 | LLLGKDFPASPPK        | K | G | 1,398.83 |
| 418 | STIP1 Stress-induced-phosphoprotein 1                       | IPI00013894,IPI00871856                         | 62,624.10 | 64 | 73 | TVDLKPDWVK           | K | G | 1,174.64 |
| 419 | RPL21;LOC729402 60S ribosomal protein L21                   | IPI00247583,IPI00480032,IPI00887074,IPI00888913 | 18,547.00 | 64 | 78 | VYNVTQHAVGIVVVK      | R | Q | 1,648.93 |
| 420 | HIST1H1C Histone H1.2                                       | IPI00217465,IPI00217466,IPI00217467             | 21,347.80 | 65 | 79 | ALAAAGYDVEKNSR       | K | I | 1,586.80 |
| 421 | PCNA Proliferating cell nuclear antigen                     | IPI00021700                                     | 28,751.30 | 65 | 77 | NLAMGVNLTSMK         | R | I | 1,373.70 |
| 422 | PCNA Proliferating cell nuclear antigen                     | IPI00021700                                     | 28,751.30 | 65 | 77 | NLAMGVNLTSMK         | R | I | 1,373.70 |
| 423 | ELAVL1 cDNA FLJ60076, highly similar to ELAV-like protein 1 | IPI00301936                                     | 38,979.00 | 65 | 77 | SLFSSIGEVEK          | R | L | 1,361.70 |
| 424 | HIST1H1C Histone H1.2                                       | IPI00217465,IPI00217466,IPI00217467             | 21,347.80 | 65 | 75 | ALAAAGYDVEK          | K | N | 1,115.58 |
| 425 | HIST1H1C Histone H1.2                                       | IPI00217465,IPI00217466,IPI00217467             | 21,347.80 | 65 | 75 | ALAAAGYDVEK          | K | N | 1,115.58 |
| 426 | RUVBL1 Isoform 1 of RuvB-like 1                             | IPI00021187                                     | 50,211.40 | 65 | 76 | AVLLAGPPGTGK         | R | T | 1,088.66 |
| 427 | RUVBL1 Isoform 1 of RuvB-like 1                             | IPI00021187                                     | 50,211.40 | 65 | 76 | AVLLAGPPGTGK         | R | T | 1,088.66 |
| 428 | ENO1 Isoform alpha-enolase of Alpha-enolase                 | IPI00465248                                     | 47,152.20 | 65 | 71 | AVEHINK              | K | T | 818.461  |
| 429 | RUVBL1 Isoform 1 of RuvB-like 1                             | IPI00021187                                     | 50,211.40 | 65 | 76 | AVLLAGPPGTGK         | R | T | 1,088.66 |
| 430 | RUVBL1 Isoform 1 of RuvB-like 1                             | IPI00021187                                     | 50,211.40 | 65 | 76 | AVLLAGPPGTGK         | R | T | 1,088.66 |
| 431 | ENO1 Isoform alpha-enolase of Alpha-enolase                 | IPI00465248                                     | 47,152.20 | 65 | 71 | AVEHINK              | K | T | 818.461  |
| 432 | RRM2 Ribonucleoside-diphosphate reductase M2 subunit        | IPI00011118                                     | 51,076.50 | 66 | 83 | VPLAPITDPQQLSPLK     | R | G | 1,966.15 |
| 433 | RRM2 Ribonucleoside-diphosphate reductase M2 subunit        | IPI00011118                                     | 51,076.50 | 66 | 83 | VPLAPITDPQQLSPLK     | R | G | 1,966.15 |
| 434 | SELS Selenoprotein S                                        | IPI00020468,IPI00793181,IPI00916735             | 21,098.40 | 66 | 77 | AAAAVEPDVVVK         | R | R | 1,176.67 |
| 435 | SELS Selenoprotein S                                        | IPI00020468,IPI00793181,IPI00916735             | 21,098.40 | 66 | 77 | AAAAVEPDVVVK         | R | R | 1,176.67 |
| 436 | UCHL1 Ubiquitin carboxyl-terminal hydrolase isozyme L1      | IPI00018352                                     | 24,806.30 | 66 | 78 | QIEELKGQEVSPK        | K | V | 1,500.82 |
| 437 | EEF1B2 Elongation factor 1-beta                             | IPI00178440                                     | 24,746.20 | 67 | 73 | ASLPGVK              | K | K | 679.4229 |
| 438 | EEF1B2 Elongation factor 1-beta                             | IPI00178440                                     | 24,746.20 | 67 | 73 | ASLPGVK              | K | K | 679.4229 |
| 439 | EEF1B2 Elongation factor 1-beta                             | IPI00178440                                     | 24,746.20 | 67 | 73 | ASLPGVK              | K | K | 679.4229 |
| 440 | RPLP0 60S acidic ribosomal protein P0                       | IPI00008530                                     | 34,256.30 | 67 | 77 | GHLENNPALEK          | R | L | 1,229.64 |
| 441 | RPLP0 60S acidic ribosomal protein P0                       | IPI00008530                                     | 34,256.30 | 67 | 77 | GHLENNPALEK          | R | L | 1,229.64 |

|     |                                                                                                                                         |                                                                                                 |           |    |    |                  |   |   |          |
|-----|-----------------------------------------------------------------------------------------------------------------------------------------|-------------------------------------------------------------------------------------------------|-----------|----|----|------------------|---|---|----------|
| 442 | DRG1 Developmentally-regulated GTP-binding protein 1                                                                                    | IPI00031836                                                                                     | 40,525.80 | 67 | 77 | IGFVGFPSVGK      | R | S | 1,115.63 |
| 443 | PDZD11 Isoform 1 of PDZ domain-containing protein 11                                                                                    | IPI00550841,IPI00641523                                                                         | 16,113.50 | 67 | 76 | ASQLGIFISK       | K | V | 1,071.63 |
| 444 | RPL12 Isoform 1 of 60S ribosomal protein L12                                                                                            | IPI00024933                                                                                     | 17,801.10 | 68 | 83 | QAQIEVVPASALIHK  | R | A | 1,674.99 |
| 445 | RPL12 Isoform 1 of 60S ribosomal protein L12                                                                                            | IPI00024933                                                                                     | 17,801.10 | 68 | 83 | QAQIEVVPASALIHK  | R | A | 1,674.99 |
| 446 | RPL12 Isoform 1 of 60S ribosomal protein L12                                                                                            | IPI00024933                                                                                     | 17,801.10 | 68 | 83 | QAQIEVVPASALIHK  | R | A | 1,674.99 |
| 447 | RPL12 Isoform 1 of 60S ribosomal protein L12                                                                                            | IPI00024933                                                                                     | 17,801.10 | 68 | 83 | QAQIEVVPASALIHK  | R | A | 1,674.99 |
| 448 | PABPC1 Isoform 1 of Polyadenylate-binding protein 1                                                                                     | IPI00008524                                                                                     | 70,653.30 | 68 | 78 | ALDTMNFVVIK      | R | G | 1,290.65 |
| 449 | PABPC1 Isoform 1 of Polyadenylate-binding protein 1                                                                                     | IPI00008524                                                                                     | 70,653.30 | 68 | 78 | ALDTMNFVVIK      | R | G | 1,274.65 |
| 450 | PABPC1 Isoform 1 of Polyadenylate-binding protein 1                                                                                     | IPI00008524                                                                                     | 70,653.30 | 68 | 78 | ALDTMNFVVIK      | R | G | 1,290.65 |
| 451 | PABPC1 Isoform 1 of Polyadenylate-binding protein 1                                                                                     | IPI00008524                                                                                     | 70,653.30 | 68 | 78 | ALDTMNFVVIK      | R | G | 1,290.65 |
| 452 | CCT7 T-complex protein 1 subunit eta                                                                                                    | IPI00018465                                                                                     | 59,349.80 | 68 | 77 | LLDVVHPPAK       | K | T | 1,070.64 |
| 453 | CCT7 T-complex protein 1 subunit eta                                                                                                    | IPI00018465                                                                                     | 59,349.80 | 68 | 77 | LLDVVHPPAK       | K | T | 1,070.64 |
| 454 | CCT7 T-complex protein 1 subunit eta                                                                                                    | IPI00018465                                                                                     | 59,349.80 | 68 | 77 | LLDVVHPPAK       | K | T | 1,070.64 |
| 455 | CCT7 T-complex protein 1 subunit eta                                                                                                    | IPI00018465                                                                                     | 59,349.80 | 68 | 77 | LLDVVHPPAK       | K | T | 1,070.64 |
| 456 | FSCN1 Fascin                                                                                                                            | IPI00163187,IPI00747810                                                                         | 54,512.30 | 69 | 82 | YLAADKDGNTVTCER  | R | E | 1,619.76 |
| 457 | RPS24 Isoform 1 of 40S ribosomal protein S24                                                                                            | IPI00029750,IPI00847986,IPI00903204,IPI00915363,IPI00915463                                     | 15,405.80 | 69 | 83 | TTGFGMIYDSLIDYAK | K | K | 1,705.79 |
| 458 | GNB2 Guanine nucleotide-binding protein G(I)/G(S)/G(T) subunit beta-2                                                                   | IPI00003348                                                                                     | 37,313.80 | 69 | 78 | LLVSASQDQK       | R | L | 1,025.57 |
| 459 | GNB2 Guanine nucleotide-binding protein G(I)/G(S)/G(T) subunit beta-2                                                                   | IPI00003348                                                                                     | 37,313.80 | 69 | 78 | LLVSASQDQK       | R | L | 1,025.57 |
| 460 | QKI Isoform 6 of Protein quaking                                                                                                        | IPI00385562,IPI00410032,IPI00410118,IPI00514277,IPI00736672,IPI00749287,IPI00759501,IPI00759828 | 35,961.00 | 69 | 85 | SAELPDAVGPVQLQEK | R | L | 1,801.98 |
| 461 | HIST1H4H;HIST2H4A;HIST4H4;HIST1H4F;HIST1H4D;HIST1H4K;HIST1H4C;HIST1H4J;HIST1H4A;HIST1H4I;HIST1H4B;HIST2H4B;HIST1H4E;HIST1H4L Histone H4 | IPI00453473                                                                                     | 11,349.70 | 69 | 78 | DAVTYTEHAK       | R | R | 1,142.56 |
| 462 | SNRPD3 Small nuclear ribonucleoprotein Sm D3                                                                                            | IPI00017964,IPI00878876,IPI00879750                                                             | 13,898.60 | 70 | 78 | FLILPDMLK        | R | N | 1,097.65 |
| 463 | RPL22 60S ribosomal protein L22                                                                                                         | IPI00219153,IPI00878392                                                                         | 14,769.30 | 70 | 80 | ITVTVSEVPFSK     | K | R | 1,215.67 |
| 464 | RPL22 60S ribosomal protein L22                                                                                                         | IPI00219153,IPI00878392                                                                         | 14,769.30 | 70 | 81 | ITVTVSEVPFSKR    | K | Y | 1,371.77 |
| 465 | RPL22 60S ribosomal protein L22                                                                                                         | IPI00219153,IPI00878392                                                                         | 14,769.30 | 70 | 81 | ITVTVSEVPFSKR    | K | Y | 1,371.77 |
| 466 | PSMC4 Isoform 1 of 26S protease regulatory subunit 6B                                                                                   | IPI00020042,IPI00738042                                                                         | 47,349.70 | 71 | 81 | EFLHAQEEVKR      | K | I | 1,393.73 |
| 467 | PSMC4 Isoform 1 of 26S protease regulatory subunit 6B                                                                                   | IPI00020042,IPI00738042                                                                         | 47,349.70 | 71 | 81 | EFLHAQEEVKR      | K | I | 1,393.73 |
| 468 | RPL9 60S ribosomal protein L9                                                                                                           | IPI00031691,IPI00795717                                                                         | 21,845.70 | 72 | 82 | TICSHVQNMIIK     | R | G | 1,354.67 |
| 469 | LRRRC59 Leucine-rich repeat-containing protein 59                                                                                       | IPI00396321                                                                                     | 34,913.40 | 72 | 83 | NKLQQLPADFGR     | K | L | 1,394.76 |
| 470 | GDI2 cDNA FLJ60299, highly similar to Rab GDP dissociation inhibitor beta                                                               | IPI00031461                                                                                     | 51,138.50 | 73 | 83 | GRDWNVDLIPK      | R | F | 1,320.72 |
| 471 | GDI2 cDNA FLJ60299, highly similar to Rab GDP dissociation inhibitor beta                                                               | IPI00031461                                                                                     | 51,138.50 | 73 | 83 | GRDWNVDLIPK      | R | F | 1,320.72 |
| 472 | AK2 Isoform 1 of Adenylate kinase isoenzyme 2, mitochondrial                                                                            | IPI00215901,IPI00218988                                                                         | 26,461.00 | 73 | 85 | LVSDMMVVELIEK    | K | N | 1,511.81 |
| 473 | AK2 Isoform 1 of Adenylate kinase isoenzyme 2, mitochondrial                                                                            | IPI00215901,IPI00218988                                                                         | 26,461.00 | 73 | 85 | LVSDMMVVELIEK    | K | N | 1,527.81 |
| 474 | AK2 Isoform 1 of Adenylate kinase isoenzyme 2, mitochondrial                                                                            | IPI00215901,IPI00218988                                                                         | 26,461.00 | 73 | 85 | LVSDMMVVELIEK    | K | N | 1,527.81 |
| 475 | AK2 Isoform 1 of Adenylate kinase isoenzyme 2, mitochondrial                                                                            | IPI00215901,IPI00218988                                                                         | 26,461.00 | 73 | 85 | LVSDMMVVELIEK    | K | N | 1,527.81 |
| 476 | NPM1 Isoform 1 of Nucleophosmin                                                                                                         | IPI00549248                                                                                     | 32,557.40 | 74 | 80 | VTLATLK          | K | M | 753.4961 |
| 477 | NPM1 Isoform 1 of Nucleophosmin                                                                                                         | IPI00549248                                                                                     | 32,557.40 | 74 | 80 | VTLATLK          | K | M | 753.4961 |
| 478 | RPL23 60S ribosomal protein L23                                                                                                         | IPI00010153,IPI00795408                                                                         | 14,847.90 | 74 | 83 | KKVHPAVVIR       | R | Q | 1,162.78 |
| 479 | RPL23 60S ribosomal protein L23                                                                                                         | IPI00010153,IPI00795408                                                                         | 14,847.90 | 74 | 83 | KKVHPAVVIR       | R | Q | 1,162.78 |
| 480 | HRAS GTPase HRas                                                                                                                        | IPI00000006                                                                                     | 21,280.10 | 74 | 88 | TGEGFLCVFAINNTK  | R | S | 1,678.84 |
| 481 | HRAS GTPase HRas                                                                                                                        | IPI00000006                                                                                     | 21,280.10 | 74 | 88 | TGEGFLCVFAINNTK  | R | S | 1,678.84 |
| 482 | HIST2H3A;HIST2H3D;HIST2H3C Histone H3.2                                                                                                 | IPI00171611,IPI00216402,IPI00465070                                                             | 15,370.70 | 74 | 80 | EIAQDFK          | R | T | 858.4448 |

|     |                                                                                     |                                                                                     |           |    |    |                      |   |   |          |
|-----|-------------------------------------------------------------------------------------|-------------------------------------------------------------------------------------|-----------|----|----|----------------------|---|---|----------|
| 483 | SNRNP Isoform SM-B' of Small nuclear ribonucleoprotein-associated proteins B and B' | IPI00027285,IPI00220360,IPI00329512,IPI00395674,IPI00785142,IPI00844420,IPI00877103 | 24,592.60 | 74 | 94 | GENLVSMTEGPPPKDTGIAR | R | V | 2,176.12 |
| 484 | EIF2B1 Translation initiation factor eIF-2B subunit alpha                           | IPI00221300                                                                         | 33,695.20 | 75 | 88 | FISLASLEYSYDYSK      | R | C | 1,630.81 |
| 485 | EIF2B1 Translation initiation factor eIF-2B subunit alpha                           | IPI00221300                                                                         | 33,695.20 | 75 | 88 | FISLASLEYSYDYSK      | R | C | 1,630.81 |
| 486 | YWHAQ 14-3-3 protein theta                                                          | IPI00018146                                                                         | 27,747.40 | 75 | 80 | KLQLIK               | K | D | 758.5471 |
| 487 | RPL23 60S ribosomal protein L23                                                     | IPI00010153,IPI00795408                                                             | 14,847.90 | 75 | 83 | KVHPAVVIR            | K | Q | 1,026.67 |
| 488 | UCHL3 Ubiquitin carboxyl-terminal hydrolase isozyme L3                              | IPI00011250                                                                         | 26,164.80 | 75 | 88 | SQGQDVTSSVYFMK       | K | Q | 1,600.74 |
| 489 | RPL23 60S ribosomal protein L23                                                     | IPI00010153,IPI00795408                                                             | 14,847.90 | 75 | 83 | KVHPAVVIR            | K | Q | 1,026.67 |
| 490 | ANP32A Acidic leucine-rich nuclear phosphoprotein 32 family member A                | IPI00025849                                                                         | 28,568.10 | 76 | 86 | VSGGLEVLAEK          | R | C | 1,109.63 |
| 491 | ANP32A Acidic leucine-rich nuclear phosphoprotein 32 family member A                | IPI00025849                                                                         | 28,568.10 | 76 | 86 | VSGGLEVLAEK          | R | C | 1,109.63 |
| 492 | ANP32A Acidic leucine-rich nuclear phosphoprotein 32 family member A                | IPI00025849                                                                         | 28,568.10 | 76 | 86 | VSGGLEVLAEK          | R | C | 1,109.63 |
| 493 | SFRS3 Splicing factor, arginine/serine-rich 3                                       | IPI00010204,IPI00843996                                                             | 19,312.00 | 76 | 86 | VRVELSNGEKR          | R | S | 1,294.73 |
| 494 | SFRS3 Splicing factor, arginine/serine-rich 3                                       | IPI00010204,IPI00843996                                                             | 19,312.00 | 76 | 86 | VRVELSNGEKR          | R | S | 1,294.73 |
| 495 | PPIA Peptidyl-prolyl cis-trans isomerase A                                          | IPI00419585,IPI00887678                                                             | 17,994.90 | 77 | 91 | SIYGEKFEDEFILK       | K | H | 1,847.94 |
| 496 | PPIA Peptidyl-prolyl cis-trans isomerase A                                          | IPI00419585,IPI00887678                                                             | 17,994.90 | 77 | 91 | SIYGEKFEDEFILK       | K | H | 1,847.94 |
| 497 | PPIA Peptidyl-prolyl cis-trans isomerase A                                          | IPI00419585,IPI00887678                                                             | 17,994.90 | 77 | 91 | SIYGEKFEDEFILK       | K | H | 1,847.94 |
| 498 | HNRNPA2B1 43 kDa protein                                                            | IPI00874030                                                                         | 43,234.30 | 77 | 82 | EKEQFR               | R | K | 844.4403 |
| 499 | RUVBL1 Isoform 1 of RuvB-like 1                                                     | IPI00021187                                                                         | 50,211.40 | 77 | 90 | TALALAIQELGSK        | K | V | 1,393.81 |
| 500 | RUVBL1 Isoform 1 of RuvB-like 1                                                     | IPI00021187                                                                         | 50,211.40 | 77 | 90 | TALALAIQELGSK        | K | V | 1,393.81 |
| 501 | RUVBL1 Isoform 1 of RuvB-like 1                                                     | IPI00021187                                                                         | 50,211.40 | 77 | 90 | TALALAIQELGSK        | K | V | 1,393.81 |
| 502 | RUVBL1 Isoform 1 of RuvB-like 1                                                     | IPI00021187                                                                         | 50,211.40 | 77 | 90 | TALALAIQELGSK        | K | V | 1,393.81 |
| 503 | RUVBL1 Isoform 1 of RuvB-like 1                                                     | IPI00021187                                                                         | 50,211.40 | 77 | 90 | TALALAIQELGSK        | K | V | 1,393.81 |
| 504 | RUVBL1 Isoform 1 of RuvB-like 1                                                     | IPI00021187                                                                         | 50,211.40 | 77 | 90 | TALALAIQELGSK        | K | V | 1,393.81 |
| 505 | RUVBL1 Isoform 1 of RuvB-like 1                                                     | IPI00021187                                                                         | 50,211.40 | 77 | 90 | TALALAIQELGSK        | K | V | 1,393.81 |
| 506 | SFRS3 Splicing factor, arginine/serine-rich 3                                       | IPI00010204,IPI00843996                                                             | 19,312.00 | 78 | 86 | VELSNGEKR            | R | S | 1,039.56 |
| 507 | NAPA Alpha-soluble NSF attachment protein                                           | IPI00009253                                                                         | 33,216.10 | 79 | 93 | HDAATCFVDAGNAFK      | K | K | 1,631.74 |
| 508 | PTGES3 Prostaglandin E synthase 3                                                   | IPI00015029,IPI00789101,IPI00789698,IPI00790462,IPI00908647                         | 18,679.90 | 79 | 88 | KGESGQSWPR           | R | L | 1,139.57 |
| 509 | PTGES3 Prostaglandin E synthase 3                                                   | IPI00015029,IPI00789101,IPI00789698,IPI00790462,IPI00908647                         | 18,679.90 | 79 | 88 | KGESGQSWPR           | R | L | 1,139.57 |
| 510 | FAR1 cDNA: FLJ22728 fis, clone HSI15617 (Fragment)                                  | IPI00386139,IPI00478838                                                             | 38,361.30 | 79 | 90 | IIAINSELTQPK         | K | L | 1,334.78 |
| 511 | GNB2 Guanine nucleotide-binding protein G(I)/G(S)/G(T) subunit beta-2               | IPI00003348                                                                         | 37,313.80 | 79 | 89 | LIIWDSYTTNK          | K | V | 1,361.72 |
| 512 | TIAL1 Nucleolysin TIAR                                                              | IPI00005615,IPI00644708,IPI00647436                                                 | 41,571.90 | 80 | 90 | VNWATTPSSQK          | K | K | 1,226.63 |
| 513 | RAB7A Ras-related protein Rab-7a                                                    | IPI00016342                                                                         | 23,472.00 | 80 | 97 | GADCCVLVFDVTAPNTFK   | R | T | 2,021.96 |
| 514 | RAB7A Ras-related protein Rab-7a                                                    | IPI00016342                                                                         | 23,472.00 | 80 | 97 | GADCCVLVFDVTAPNTFK   | R | T | 2,021.96 |
| 515 | SLC25A5 ADP/ATP translocase 2                                                       | IPI00007188                                                                         | 32,878.50 | 81 | 92 | YFPTQALNFAFK         | R | D | 1,454.76 |
| 516 | CHMP2A Charged multivesicular body protein 2a                                       | IPI00004416                                                                         | 25,087.00 | 81 | 89 | ANIQAVSLK            | R | I | 951.5713 |
| 517 | CHMP2A Charged multivesicular body protein 2a                                       | IPI00004416                                                                         | 25,087.00 | 81 | 89 | ANIQAVSLK            | R | I | 951.5713 |
| 518 | RPL24 60S ribosomal protein L24                                                     | IPI00306332,IPI00791426,IPI00793696,IPI00873403                                     | 17,761.50 | 81 | 93 | AITGASLADIMAK        | R | R | 1,269.70 |
| 519 | TRAPPC5 Trafficking protein particle complex subunit 5                              | IPI00177509                                                                         | 20,765.40 | 82 | 90 | VLGALLFVK            | K | G | 967.6431 |
| 520 | TRAPPC5 Trafficking protein particle complex subunit 5                              | IPI00177509                                                                         | 20,765.40 | 82 | 90 | VLGALLFVK            | K | G | 967.6431 |
| 521 | TRAPPC5 Trafficking protein particle complex subunit 5                              | IPI00177509                                                                         | 20,765.40 | 82 | 90 | VLGALLFVK            | K | G | 967.6431 |
| 522 | HNRNPH1 Heterogeneous nuclear ribonucleoprotein H                                   | IPI00013881,IPI00479191                                                             | 49,211.80 | 82 | 87 | YVEVFK               | R | S | 792.4381 |
| 523 | HSP90AB1 Heat shock protein HSP 90-beta                                             | IPI00414676                                                                         | 83,249.30 | 83 | 95 | TLTLVDTGIGMTK        | R | A | 1,373.74 |
| 524 | HSP90AB1 Heat shock protein HSP 90-beta                                             | IPI00414676                                                                         | 83,249.30 | 83 | 95 | TLTLVDTGIGMTK        | R | A | 1,373.74 |
| 525 | HSP90AB1 Heat shock protein HSP 90-beta                                             | IPI00414676                                                                         | 83,249.30 | 83 | 95 | TLTLVDTGIGMTK        | R | A | 1,373.74 |
| 526 | HSP90AB1 Heat shock protein HSP 90-beta                                             | IPI00414676                                                                         | 83,249.30 | 83 | 95 | TLTLVDTGIGMTK        | R | A | 1,373.74 |
| 527 | HSP90AB1 Heat shock protein HSP 90-beta                                             | IPI00414676                                                                         | 83,249.30 | 83 | 95 | TLTLVDTGIGMTK        | R | A | 1,357.75 |

|     |                                                                  |                                                             |            |    |     |                       |   |   |          |
|-----|------------------------------------------------------------------|-------------------------------------------------------------|------------|----|-----|-----------------------|---|---|----------|
| 528 | PPIA Peptidyl-prolyl cis-trans isomerase A                       | IPI00419585,IPI00887678                                     | 17,994.90  | 83 | 91  | FEDENFILK             | K | H | 1,162.59 |
| 529 | RAB11B Ras-related protein Rab-11B                               | IPI00020436,IPI00429190,IPI00795676                         | 24,471.00  | 83 | 95  | GAVGALLVYDIAK         | R | H | 1,297.76 |
| 530 | PPIA Peptidyl-prolyl cis-trans isomerase A                       | IPI00419585,IPI00887678                                     | 17,994.90  | 83 | 91  | FEDENFILK             | K | H | 1,162.59 |
| 531 | RAB11B Ras-related protein Rab-11B                               | IPI00020436,IPI00429190,IPI00795676                         | 24,471.00  | 83 | 95  | GAVGALLVYDIAK         | R | H | 1,297.76 |
| 532 | HNRNPA2B1 43 kDa protein                                         | IPI00874030                                                 | 43,234.30  | 83 | 99  | KLFIGGLSFETTEESLR     | R | N | 1,935.03 |
| 533 | TOP2A DNA topoisomerase 2 (Fragment)                             | IPI00178667,IPI00218753,IPI00414101,IPI00478232,IPI00879004 | 182,965.00 | 83 | 95  | IFDEILVNAADNK         | K | Q | 1,469.77 |
| 534 | TOP2A DNA topoisomerase 2 (Fragment)                             | IPI00178667,IPI00218753,IPI00414101,IPI00478232,IPI00879004 | 182,965.00 | 83 | 95  | IFDEILVNAADNK         | K | Q | 1,469.77 |
| 535 | TOP2A DNA topoisomerase 2 (Fragment)                             | IPI00178667,IPI00218753,IPI00414101,IPI00478232,IPI00879004 | 182,965.00 | 83 | 95  | IFDEILVNAADNK         | K | Q | 1,469.77 |
| 536 | CGGBP1 CGG triplet repeat-binding protein 1                      | IPI00295585                                                 | 18,802.20  | 83 | 100 | QRPLTASLQCNSTAQTEK    | K | V | 2,041.02 |
| 537 | YWHAZ 14-3-3 protein zeta/delta                                  | IPI00021263                                                 | 27,727.90  | 84 | 91  | EKIETELR              | R | D | 1,025.57 |
| 538 | YWHAQ 14-3-3 protein theta                                       | IPI00018146                                                 | 27,747.40  | 84 | 91  | EKVESELR              | R | S | 997.5404 |
| 539 | (Bos taurus) similar to alpha-tubulin I isoform 1                | CON_00700865,IPI00387144,IPI00792677                        | 50,133.70  | 85 | 96  | QLFHPEQLITGK          | R | E | 1,418.79 |
| 540 | (Bos taurus) similar to alpha-tubulin I isoform 1                | CON_00700865,IPI00387144,IPI00792677                        | 50,133.70  | 85 | 96  | QLFHPEQLITGK          | R | E | 1,418.79 |
| 541 | (Bos taurus) similar to alpha-tubulin I isoform 1                | CON_00700865,IPI00387144,IPI00792677                        | 50,133.70  | 85 | 96  | QLFHPEQLITGK          | R | E | 1,418.79 |
| 542 | (Bos taurus) similar to alpha-tubulin I isoform 1                | CON_00700865,IPI00387144,IPI00792677                        | 50,133.70  | 85 | 96  | QLFHPEQLITGK          | R | E | 1,418.79 |
| 543 | (Bos taurus) similar to alpha-tubulin I isoform 1                | CON_00700865,IPI00387144,IPI00792677                        | 50,133.70  | 85 | 105 | QLFHPEQLITGKEDAANNYAR | R | G | 2,423.22 |
| 544 | (Bos taurus) similar to alpha-tubulin I isoform 1                | CON_00700865,IPI00387144,IPI00792677                        | 50,133.70  | 85 | 105 | QLFHPEQLITGKEDAANNYAR | R | G | 2,423.22 |
| 545 | (Bos taurus) similar to alpha-tubulin I isoform 1                | CON_00700865,IPI00387144,IPI00792677                        | 50,133.70  | 85 | 105 | QLFHPEQLITGKEDAANNYAR | R | G | 2,423.22 |
| 546 | (Bos taurus) similar to alpha-tubulin I isoform 1                | CON_00700865,IPI00387144,IPI00792677                        | 50,133.70  | 85 | 105 | QLFHPEQLITGKEDAANNYAR | R | G | 2,423.22 |
| 547 | (Bos taurus) similar to alpha-tubulin I isoform 1                | CON_00700865,IPI00387144,IPI00792677                        | 50,133.70  | 85 | 105 | QLFHPEQLITGKEDAANNYAR | R | G | 2,423.22 |
| 548 | PTBP1 Isoform 1 of Polypyrimidine tract-binding protein 1        | IPI00179964,IPI00183626,IPI00334175                         | 57,204.50  | 85 | 92  | VTNLLMLK              | K | G | 955.5738 |
| 549 | (Bos taurus) similar to alpha-tubulin I isoform 1                | CON_00700865,IPI00387144,IPI00792677                        | 50,133.70  | 85 | 105 | QLFHPEQLITGKEDAANNYAR | R | G | 2,423.22 |
| 550 | (Bos taurus) similar to alpha-tubulin I isoform 1                | CON_00700865,IPI00387144,IPI00792677                        | 50,133.70  | 85 | 105 | QLFHPEQLITGKEDAANNYAR | R | G | 2,423.22 |
| 551 | (Bos taurus) similar to alpha-tubulin I isoform 1                | CON_00700865,IPI00387144,IPI00792677                        | 50,133.70  | 85 | 105 | QLFHPEQLITGKEDAANNYAR | R | G | 2,423.22 |
| 552 | PTBP1 Isoform 1 of Polypyrimidine tract-binding protein 1        | IPI00179964,IPI00183626,IPI00334175                         | 57,204.50  | 85 | 92  | VTNLLMLK              | K | G | 955.5738 |
| 553 | RPS12 40S ribosomal protein S12                                  | IPI00013917,IPI00847579                                     | 14,507.70  | 85 | 93  | LGEWVGLCK             | K | I | 1,069.56 |
| 554 | RPS12 40S ribosomal protein S12                                  | IPI00013917,IPI00847579                                     | 14,507.70  | 85 | 93  | LGEWVGLCK             | K | I | 1,069.56 |
| 555 | PRDX6 Peroxiredoxin-6                                            | IPI00220301                                                 | 25,018.10  | 85 | 97  | DINAYNCEEPTK          | K | L | 1,590.68 |
| 556 | PRDX6 Peroxiredoxin-6                                            | IPI00220301                                                 | 25,018.10  | 85 | 97  | DINAYNCEEPTK          | K | L | 1,590.68 |
| 557 | TARS Threonyl-tRNA synthetase, cytoplasmic                       | IPI00329633,IPI00908949                                     | 83,419.80  | 85 | 91  | VTLPDGK               | K | Q | 737.4285 |
| 558 | RPL27 60S ribosomal protein L27                                  | IPI00219155                                                 | 15,780.40  | 85 | 93  | YSVDIPLDK             | R | T | 1,057.57 |
| 559 | RPL27 60S ribosomal protein L27                                  | IPI00219155                                                 | 15,780.40  | 85 | 93  | YSVDIPLDK             | R | T | 1,057.57 |
| 560 | RPS25 40S ribosomal protein S25                                  | IPI00012750                                                 | 13,725.00  | 86 | 94  | AALQELLSK             | R | G | 980.5867 |
| 561 | RPS25 40S ribosomal protein S25                                  | IPI00012750                                                 | 13,725.00  | 86 | 94  | AALQELLSK             | R | G | 980.5867 |
| 562 | RPA2 Isoform 1 of Replication protein A 32 kDa subunit           | IPI00013939,IPI00646500,IPI00646957,IPI00647667             | 29,228.70  | 86 | 93  | APTNIYYK              | K | I | 913.5233 |
| 563 | EIF5A Isoform 2 of Eukaryotic translation initiation factor 5A-1 | IPI00376005,IPI00411704                                     | 20,152.80  | 86 | 97  | VHLVGIDIFTGK          | K | K | 1,306.76 |
| 564 | EIF5A Isoform 2 of Eukaryotic translation initiation factor 5A-1 | IPI00376005,IPI00411704                                     | 20,152.80  | 86 | 97  | VHLVGIDIFTGK          | K | K | 1,306.76 |
| 565 | SNRNPB2 U2 small nuclear ribonucleoprotein B"                    | IPI00029267                                                 | 25,469.50  | 86 | 93  | TDSDIISK              | K | M | 886.4609 |
| 566 | SNRNPB2 U2 small nuclear ribonucleoprotein B"                    | IPI00029267                                                 | 25,469.50  | 86 | 93  | TDSDIISK              | K | M | 886.4609 |
| 567 | BTF3 Isoform 1 of Transcription factor BTF3                      | IPI00221035                                                 | 22,150.30  | 87 | 94  | KLQFSLKK              | K | L | 1,015.67 |
| 568 | YWHAE 14-3-3 protein epsilon                                     | IPI00000816                                                 | 29,157.00  | 87 | 94  | QMVETELK              | R | L | 1,001.51 |
| 569 | HNRNPH1 Heterogeneous nuclear ribonucleoprotein H                | IPI00013881,IPI00479191                                     | 49,211.80  | 88 | 98  | SNNVEMDWVLK           | K | H | 1,358.65 |
| 570 | HNRNPH1 Heterogeneous nuclear ribonucleoprotein H                | IPI00013881,IPI00479191                                     | 49,211.80  | 88 | 98  | SNNVEMDWVLK           | K | H | 1,342.66 |



|     |                                                                        |                                                 |           |    |     |                                 |   |   |          |
|-----|------------------------------------------------------------------------|-------------------------------------------------|-----------|----|-----|---------------------------------|---|---|----------|
| 571 | HNRNPH1 Heterogeneous nuclear ribonucleoprotein H                      | IPI00013881,IPI00479191                         | 49,211.80 | 88 | 98  | SNNVEMDWVLK                     | K | H | 1,342.66 |
| 572 | HNRNPH1 Heterogeneous nuclear ribonucleoprotein H                      | IPI00013881,IPI00479191                         | 49,211.80 | 88 | 98  | SNNVEMDWVLK                     | K | H | 1,342.66 |
| 573 | PIN4 protein (peptidyl-prolyl cis/trans isomerase) NIMA-interacting, 4 | IPI00006658                                     | 16,590.50 | 89 | 100 | FNEVAAQYSEDK                    | R | A | 1,408.65 |
| 574 | PIN4 protein (peptidyl-prolyl cis/trans isomerase) NIMA-interacting, 4 | IPI00006658                                     | 16,590.50 | 89 | 100 | FNEVAAQYSEDK                    | R | A | 1,408.65 |
| 575 | MAT2A S-adenosylmethionine synthetase isoform type-2                   | IPI00010157                                     | 43,642.80 | 89 | 97  | HIGYDDSSK                       | K | G | 1,029.47 |
| 576 | PIN4 protein (peptidyl-prolyl cis/trans isomerase) NIMA-interacting, 4 | IPI00006658                                     | 16,590.50 | 89 | 102 | FNEVAAQYSEDKAR                  | R | Q | 1,635.79 |
| 577 | HMGB1 High mobility group protein B1                                   | IPI00419258                                     | 24,876.70 | 89 | 96  | FKDPNAPK                        | K | R | 932.5172 |
| 578 | HMGB1 High mobility group protein B1                                   | IPI00419258                                     | 24,876.70 | 89 | 96  | FKDPNAPK                        | K | R | 932.5172 |
| 579 | HMGB1 High mobility group protein B1                                   | IPI00419258                                     | 24,876.70 | 89 | 96  | FKDPNAPK                        | K | R | 932.5172 |
| 580 | EIF1AY Eukaryotic translation initiation factor 1A, Y-chromosomal      | IPI00023004,IPI00232533,IPI00642387,IPI00647118 | 16,425.30 | 89 | 94  | ADVILK                          | K | Y | 666.4277 |
| 581 | EIF1AY Eukaryotic translation initiation factor 1A, Y-chromosomal      | IPI00023004,IPI00232533,IPI00642387,IPI00647118 | 16,425.30 | 89 | 94  | ADVILK                          | K | Y | 666.4277 |
| 582 | HIST1H2AC Histone H2A type 1-C                                         | IPI00216456                                     | 14,088.00 | 90 | 96  | NDEELNK                         | R | L | 869.4091 |
| 583 | CDC123 Cell division cycle protein 123 homolog                         | IPI00005670,IPI00514175                         | 39,118.10 | 90 | 104 | VQEAINSLGGSVFPK                 | K | L | 1,553.84 |
| 584 | CDC123 Cell division cycle protein 123 homolog                         | IPI00005670,IPI00514175                         | 39,118.10 | 90 | 104 | VQEAINSLGGSVFPK                 | K | L | 1,553.84 |
| 585 | HIST1H2AC Histone H2A type 1-C                                         | IPI00216456                                     | 14,088.00 | 90 | 100 | NDEELNKLLGR                     | R | V | 1,308.70 |
| 586 | YWHAZ 14-3-3 protein zeta/delta                                        | IPI00021263                                     | 27,727.90 | 92 | 103 | DICNDVLSLLEK                    | R | F | 1,426.73 |
| 587 | YWHAZ 14-3-3 protein zeta/delta                                        | IPI00021263                                     | 27,727.90 | 92 | 103 | DICNDVLSLLEK                    | R | F | 1,426.73 |
| 588 | PPIA Peptidyl-prolyl cis-trans isomerase A                             | IPI00419585,IPI00887678                         | 17,994.90 | 92 | 118 | HTGPGILSMANAGPNTNGSQ            | K | T | 2,815.34 |
| 589 | PPIA Peptidyl-prolyl cis-trans isomerase A                             | IPI00419585,IPI00887678                         | 17,994.90 | 92 | 118 | FFICTAK<br>HTGPGILSMANAGPNTNGSQ | K | T | 2,815.34 |
| 590 | PFN1 Profilin-1                                                        | IPI00216691                                     | 15,036.30 | 92 | 105 | STGGAPTFNVTVTK                  | K | T | 1,387.73 |
| 591 | PCNA Proliferating cell nuclear antigen                                | IPI00021700                                     | 28,751.30 | 92 | 110 | AEDNADTLALVFEAPNQEK             | R | V | 2,083.01 |
| 592 | PCNA Proliferating cell nuclear antigen                                | IPI00021700                                     | 28,751.30 | 92 | 110 | AEDNADTLALVFEAPNQEK             | R | V | 2,083.01 |
| 593 | PCNA Proliferating cell nuclear antigen                                | IPI00021700                                     | 28,751.30 | 92 | 110 | AEDNADTLALVFEAPNQEK             | R | V | 2,083.01 |
| 594 | YWHAQ 14-3-3 protein theta                                             | IPI00018146                                     | 27,747.40 | 92 | 103 | SICTTVLELLDK                    | R | Y | 1,399.76 |
| 595 | HNRNPAB Isoform 2 of Heterogeneous nuclear ribonucleoprotein A/B       | IPI00334587,IPI00334713,IPI00742926             | 35,949.90 | 93 | 102 | FGEVVDCTIK                      | K | M | 1,175.59 |
| 596 | PEBP1 Phosphatidylethanolamine-binding protein 1                       | IPI00219446                                     | 21,038.90 | 94 | 113 | GNDISSGTVLSDYVGSPPK             | K | G | 1,957.96 |
| 597 | PEBP1 Phosphatidylethanolamine-binding protein 1                       | IPI00219446                                     | 21,038.90 | 94 | 113 | GNDISSGTVLSDYVGSPPK             | K | G | 1,957.96 |
| 598 | YWHAE 14-3-3 protein epsilon                                           | IPI00000816                                     | 29,157.00 | 95 | 106 | LICCDILDVLDK                    | K | H | 1,484.76 |
| 599 | YWHAE 14-3-3 protein epsilon                                           | IPI00000816                                     | 29,157.00 | 95 | 106 | LICCDILDVLDK                    | K | H | 1,484.76 |
| 600 | YWHAE 14-3-3 protein epsilon                                           | IPI00000816                                     | 29,157.00 | 95 | 106 | LICCDILDVLDK                    | K | H | 1,484.76 |
| 601 | YWHAE 14-3-3 protein epsilon                                           | IPI00000816                                     | 29,157.00 | 95 | 106 | LICCDILDVLDK                    | K | H | 1,484.76 |
| 602 | YWHAE 14-3-3 protein epsilon                                           | IPI00000816                                     | 29,157.00 | 95 | 106 | LICCDILDVLDK                    | K | H | 1,484.76 |
| 603 | ACTG1 Actin, cytoplasmic 2                                             | IPI00021440                                     | 41,775.90 | 96 | 113 | VAPEEHPVLLTEAPLNPK              | R | A | 1,962.08 |
| 604 | ACTG1 Actin, cytoplasmic 2                                             | IPI00021440                                     | 41,775.90 | 96 | 113 | VAPEEHPVLLTEAPLNPK              | R | A | 1,962.08 |
| 605 | ACTG1 Actin, cytoplasmic 2                                             | IPI00021440                                     | 41,775.90 | 96 | 113 | VAPEEHPVLLTEAPLNPK              | R | A | 1,962.08 |
| 606 | ACTG1 Actin, cytoplasmic 2                                             | IPI00021440                                     | 41,775.90 | 96 | 113 | VAPEEHPVLLTEAPLNPK              | R | A | 1,962.08 |
| 607 | FIS1 Mitochondrial fission 1 protein                                   | IPI00007052                                     | 16,920.30 | 96 | 108 | GLLQTEPQNNQAK                   | R | E | 1,448.76 |
| 608 | SRM Spermidine synthase                                                | IPI00292020                                     | 33,806.50 | 96 | 109 | KVLIIGGGDGGVLR                  | R | E | 1,361.84 |
| 609 | FIS1 Mitochondrial fission 1 protein                                   | IPI00007052                                     | 16,920.30 | 96 | 108 | GLLQTEPQNNQAK                   | R | E | 1,448.76 |
| 610 | SRM Spermidine synthase                                                | IPI00292020                                     | 33,806.50 | 96 | 109 | KVLIIGGGDGGVLR                  | R | E | 1,361.84 |
| 611 | CLIC1 Chloride intracellular channel protein 1                         | IPI00010896                                     | 26,905.30 | 96 | 113 | LAALNPESNTAGLDIFAK              | K | F | 1,852.99 |
| 612 | EEF1D Elongation factor 1-delta                                        | IPI00023048                                     | 31,103.90 | 96 | 107 | GVVQELQQAISK                    | R | L | 1,307.74 |
| 613 | PABPC1 Isoform 1 of Polyadenylate-binding protein 1                    | IPI00008524                                     | 70,653.30 | 96 | 104 | SGVGNIFIK                       | K | N | 942.5499 |
| 614 | PABPC1 Isoform 1 of Polyadenylate-binding protein 1                    | IPI00008524                                     | 70,653.30 | 96 | 104 | SGVGNIFIK                       | K | N | 942.5499 |

|     |                                                                      |                                                 |           |     |     |                              |   |   |          |
|-----|----------------------------------------------------------------------|-------------------------------------------------|-----------|-----|-----|------------------------------|---|---|----------|
| 615 | PABPC1 Isoform 1 of Polyadenylate-binding protein 1                  | IPI00008524                                     | 70,653.30 | 96  | 104 | SGVGNIFIK                    | K | N | 942.5499 |
| 616 | PABPC1 Isoform 1 of Polyadenylate-binding protein 1                  | IPI00008524                                     | 70,653.30 | 96  | 104 | SGVGNIFIK                    | K | N | 942.5499 |
| 617 | PABPC1 Isoform 1 of Polyadenylate-binding protein 1                  | IPI00008524                                     | 70,653.30 | 96  | 104 | SGVGNIFIK                    | K | N | 942.5499 |
| 618 | HSP90AB1 Heat shock protein HSP 90-beta                              | IPI00414676                                     | 83,249.30 | 96  | 107 | ADLINNLGTIAK                 | K | S | 1,250.72 |
| 619 | HSP90AB1 Heat shock protein HSP 90-beta                              | IPI00414676                                     | 83,249.30 | 96  | 107 | ADLINNLGTIAK                 | K | S | 1,250.72 |
| 620 | HSP90AB1 Heat shock protein HSP 90-beta                              | IPI00414676                                     | 83,249.30 | 96  | 107 | ADLINNLGTIAK                 | K | S | 1,250.72 |
| 621 | HSP90AB1 Heat shock protein HSP 90-beta                              | IPI00414676                                     | 83,249.30 | 96  | 107 | ADLINNLGTIAK                 | K | S | 1,250.72 |
| 622 | NUDC Nuclear migration protein nudC                                  | IPI00550746                                     | 38,225.70 | 97  | 105 | SETSGPQIK                    | K | E | 954.4983 |
| 623 | NUDC Nuclear migration protein nudC                                  | IPI00550746                                     | 38,225.70 | 97  | 105 | SETSGPQIK                    | K | E | 954.4983 |
| 624 | RPL17;LOC100133931 60S ribosomal protein L17                         | IPI00413324                                     | 21,379.40 | 97  | 105 | NAESNAELK                    | K | G | 983.4883 |
| 625 | SPCS3 Signal peptidase complex subunit 3                             | IPI00300299                                     | 20,296.20 | 97  | 108 | NNALNQVVLWDK                 | K | I | 1,421.76 |
| 626 | HMGB1 High mobility group protein B1                                 | IPI00419258                                     | 24,876.70 | 97  | 112 | RPPSAFFLFCSEYRPK             | K | I | 2,010.01 |
| 627 | SLC25A5 ADP/ATP translocase 2                                        | IPI00007188                                     | 32,878.50 | 97  | 106 | QIFLGGVDKR                   | K | T | 1,140.66 |
| 628 | SLC25A5 ADP/ATP translocase 2                                        | IPI00007188                                     | 32,878.50 | 97  | 106 | QIFLGGVDKR                   | K | T | 1,140.66 |
| 629 | TPI1 Isoform 1 of Triosephosphate isomerase                          | IPI00465028                                     | 30,772.80 | 97  | 106 | IAVAAQNCCYK                  | K | V | 1,145.59 |
| 630 | TPI1 Isoform 1 of Triosephosphate isomerase                          | IPI00465028                                     | 30,772.80 | 97  | 106 | IAVAAQNCCYK                  | K | V | 1,145.59 |
| 631 | RPL7 60S ribosomal protein L7                                        | IPI00030179,IPI00472171,IPI00871827,IPI00872387 | 29,209.70 | 97  | 104 | GINGVSPK                     | R | V | 779.4502 |
| 632 | TPI1 Isoform 1 of Triosephosphate isomerase                          | IPI00465028                                     | 30,772.80 | 97  | 106 | IAVAAQNCCYK                  | K | V | 1,145.59 |
| 633 | TPI1 Isoform 1 of Triosephosphate isomerase                          | IPI00465028                                     | 30,772.80 | 97  | 106 | IAVAAQNCCYK                  | K | V | 1,145.59 |
| 634 | TPI1 Isoform 1 of Triosephosphate isomerase                          | IPI00465028                                     | 30,772.80 | 97  | 106 | IAVAAQNCCYK                  | K | V | 1,145.59 |
| 635 | BASP1 Brain acid soluble protein 1                                   | IPI00299024                                     | 22,675.30 | 98  | 121 | AEPKKAPEQEQAAPGPAAGG<br>EAPK | K | A | 2,314.16 |
| 636 | HIST1H1C Histone H1.2                                                | IPI00217465,IPI00217466,IPI00217467             | 21,347.80 | 98  | 106 | GTGASGSFK                    | K | L | 819.4087 |
| 637 | RPS7 40S ribosomal protein S7                                        | IPI00013415                                     | 22,109.50 | 99  | 106 | RILPKPTR                     | R | K | 988.6507 |
| 638 | NONO Non-POU domain-containing octamer-binding protein               | IPI00304596                                     | 54,213.60 | 100 | 107 | AGEVFIHK                     | K | D | 908.508  |
| 639 | NONO Non-POU domain-containing octamer-binding protein               | IPI00304596                                     | 54,213.60 | 100 | 107 | AGEVFIHK                     | K | D | 908.508  |
| 640 | HNRNPA0 Heterogeneous nuclear ribonucleoprotein A0                   | IPI00011913                                     | 30,822.50 | 100 | 106 | LFVGGGLK                     | K | G | 741.475  |
| 641 | ANP32A Acidic leucine-rich nuclear phosphoprotein 32 family member A | IPI00025849                                     | 28,568.10 | 100 | 110 | IKDLSTIEPLK                  | K | K | 1,272.77 |
| 642 | HNRNPA2B1 43 kDa protein                                             | IPI00874030                                     | 43,234.30 | 100 | 107 | NYEQWGK                      | R | L | 1,095.50 |
| 643 | HNRNPA2B1 43 kDa protein                                             | IPI00874030                                     | 43,234.30 | 100 | 107 | NYEQWGK                      | R | L | 1,095.50 |
| 644 | RPS7 40S ribosomal protein S7                                        | IPI00013415                                     | 22,109.50 | 100 | 107 | ILPKPTRK                     | R | S | 960.6446 |
| 645 | HIST1H2BL Histone H2B type 1-L                                       | IPI00018534                                     | 13,934.70 | 101 | 109 | LLPGELAK                     | R | H | 961.6174 |
| 646 | HIST1H2BL Histone H2B type 1-L                                       | IPI00018534                                     | 13,934.70 | 101 | 109 | LLPGELAK                     | R | H | 961.6174 |
| 647 | HIST1H2BL Histone H2B type 1-L                                       | IPI00018534                                     | 13,934.70 | 101 | 109 | LLPGELAK                     | R | H | 961.6174 |
| 648 | HIST1H2AC Histone H2A type 1-C                                       | IPI00216456                                     | 14,088.00 | 101 | 119 | VIAQGGVLPNIQAVLLPK           | R | K | 1,939.18 |
| 649 | HIST1H2AC Histone H2A type 1-C                                       | IPI00216456                                     | 14,088.00 | 101 | 119 | VIAQGGVLPNIQAVLLPK           | R | K | 1,939.18 |
| 650 | HIST1H2AC Histone H2A type 1-C                                       | IPI00216456                                     | 14,088.00 | 101 | 119 | VIAQGGVLPNIQAVLLPK           | R | K | 1,939.18 |
| 651 | HIST1H2AC Histone H2A type 1-C                                       | IPI00216456                                     | 14,088.00 | 101 | 119 | VIAQGGVLPNIQAVLLPK           | R | K | 1,939.18 |
| 652 | SNAP23 Isoform SNAP-23a of Synaptosomal-associated protein 23        | IPI00010438                                     | 23,336.80 | 101 | 117 | TTWGDGGENSPCNVSK             | K | Q | 1,815.81 |
| 653 | TRAPPC5 Trafficking protein particle complex subunit 5               | IPI00177509                                     | 20,765.40 | 101 | 113 | EADKLEQANDDAR                | K | T | 1,482.69 |
| 654 | GRB2 Isoform 1 of Growth factor receptor-bound protein 2             | IPI00021327                                     | 25,188.80 | 101 | 109 | FGNDVQHFK                    | K | V | 1,099.54 |
| 655 | GRB2 Isoform 1 of Growth factor receptor-bound protein 2             | IPI00021327                                     | 25,188.80 | 101 | 109 | FGNDVQHFK                    | K | V | 1,099.54 |
| 656 | SUB1 Activated RNA polymerase II transcriptional coactivator p15     | IPI00221222                                     | 14,377.90 | 102 | 114 | GISLNPEQWSQLK                | K | E | 1,507.80 |
| 657 | PCBP1 Poly(rC)-binding protein 1                                     | IPI00016610                                     | 37,480.20 | 102 | 115 | LVPATQCGSLIGK                | R | G | 1,450.82 |
| 658 | PCBP2 Poly(rC)-binding protein 2                                     | IPI00216689,IPI00796337                         | 38,562.90 | 102 | 115 | LVPASQCGSLIGK                | R | G | 1,436.80 |
| 659 | PCBP1 Poly(rC)-binding protein 1                                     | IPI00016610                                     | 37,480.20 | 102 | 115 | LVPATQCGSLIGK                | R | G | 1,450.82 |

|     |                                                                    |                                                 |           |     |     |                     |   |   |          |
|-----|--------------------------------------------------------------------|-------------------------------------------------|-----------|-----|-----|---------------------|---|---|----------|
| 660 | PCBP2 Poly(rC)-binding protein 2                                   | IPI00216689,IPI00796337                         | 38,562.90 | 102 | 115 | LVVPASQCGSLIGK      | R | G | 1,436.80 |
| 661 | PCBP1 Poly(rC)-binding protein 1                                   | IPI00016610                                     | 37,480.20 | 102 | 115 | LVVPATQCGSLIGK      | R | G | 1,450.82 |
| 662 | PCBP2 Poly(rC)-binding protein 2                                   | IPI00216689,IPI00796337                         | 38,562.90 | 102 | 115 | LVVPASQCGSLIGK      | R | G | 1,436.80 |
| 663 | RPS19 40S ribosomal protein S19                                    | IPI00215780                                     | 16,042.50 | 102 | 111 | RVLQALEGLK          | R | M | 1,134.71 |
| 664 | RPS19 40S ribosomal protein S19                                    | IPI00215780                                     | 16,042.50 | 102 | 111 | RVLQALEGLK          | R | M | 1,134.71 |
| 665 | RPL31 60S ribosomal protein L31                                    | IPI00026302                                     | 14,445.20 | 102 | 115 | LYTLVTYVPVTTFFK     | K | N | 1,652.94 |
| 666 | POLR2E DNA-directed RNA polymerases I, II, and III subunit RPABC1  | IPI00291093                                     | 24,533.40 | 102 | 115 | ALIVVQQGMTPSAK      | R | Q | 1,466.81 |
| 667 | TKT cDNA FLJ54957, highly similar to Transketolase                 | IPI00643920                                     | 68,725.40 | 102 | 114 | KISSDLDGHPVPK       | R | Q | 1,408.78 |
| 668 | RPL22 60S ribosomal protein L22                                    | IPI00219153,IPI00878392                         | 14,769.30 | 102 | 113 | VVANSKESYELR        | R | Y | 1,402.74 |
| 669 | RPS19 40S ribosomal protein S19                                    | IPI00215780                                     | 16,042.50 | 103 | 111 | VLQALEGLK           | R | M | 978.6075 |
| 670 | RPS19 40S ribosomal protein S19                                    | IPI00215780                                     | 16,042.50 | 103 | 111 | VLQALEGLK           | R | M | 978.6075 |
| 671 | TKT cDNA FLJ54957, highly similar to Transketolase                 | IPI00643920                                     | 68,725.40 | 103 | 114 | ISSDLDGHPVPK        | K | Q | 1,272.67 |
| 672 | HSPA8 Isoform 1 of Heat shock cognate 71 kDa protein               | IPI00003865                                     | 70,881.80 | 103 | 112 | VQVEYKGETK          | K | S | 1,196.65 |
| 673 | TUBB Tubulin beta chain                                            | IPI00011654                                     | 49,652.60 | 104 | 122 | GHYTEGAELVDSVLDVVRK | K | E | 2,095.09 |
| 674 | TUBB2B Tubulin beta-2B chain                                       | IPI00031370                                     | 49,935.10 | 104 | 122 | GHYTEGAELVDSVLDVVRK | K | E | 2,095.09 |
| 675 | TUBB2C Tubulin beta-2C chain                                       | IPI00007752                                     | 49,812.70 | 104 | 122 | GHYTEGAELVDSVLDVVRK | K | E | 2,095.09 |
| 676 | TUBB Tubulin beta chain                                            | IPI00011654                                     | 49,652.60 | 104 | 122 | GHYTEGAELVDSVLDVVRK | K | E | 2,095.09 |
| 677 | TUBB2B Tubulin beta-2B chain                                       | IPI00031370                                     | 49,935.10 | 104 | 122 | GHYTEGAELVDSVLDVVRK | K | E | 2,095.09 |
| 678 | TUBB Tubulin beta chain                                            | IPI00011654                                     | 49,652.60 | 104 | 122 | GHYTEGAELVDSVLDVVRK | K | E | 2,095.09 |
| 679 | TUBB2C Tubulin beta-2C chain                                       | IPI00007752                                     | 49,812.70 | 104 | 122 | GHYTEGAELVDSVLDVVRK | K | E | 2,095.09 |
| 680 | OCIAD1 Isoform 1 of OCIA domain-containing protein 1               | IPI00016405                                     | 27,608.80 | 104 | 115 | KLENSPLGEALR        | K | S | 1,334.75 |
| 681 | OCIAD1 Isoform 1 of OCIA domain-containing protein 1               | IPI00016405                                     | 27,608.80 | 104 | 115 | KLENSPLGEALR        | K | S | 1,334.75 |
| 682 | OCIAD1 Isoform 1 of OCIA domain-containing protein 1               | IPI00016405                                     | 27,608.80 | 104 | 115 | KLENSPLGEALR        | K | S | 1,334.75 |
| 683 | YWHAZ 14-3-3 protein zeta/delta                                    | IPI00021263                                     | 27,727.90 | 104 | 115 | FLIPNASQAESK        | K | V | 1,312.70 |
| 684 | RPS14 40S ribosomal protein S14                                    | IPI00026271                                     | 16,254.90 | 105 | 117 | TKTPGPGAQSALR       | R | A | 1,291.72 |
| 685 | RPS14 40S ribosomal protein S14                                    | IPI00026271                                     | 16,254.90 | 105 | 117 | TKTPGPGAQSALR       | R | A | 1,291.72 |
| 686 | (Bos taurus) similar to alpha-tubulin I isoform 1                  | CON_00700865,IPI00387144,IPI00792677            | 50,133.70 | 106 | 112 | GHYTIGK             | R | E | 783.424  |
| 687 | TPI1 Isoform 1 of Triosephosphate isomerase                        | IPI00465028                                     | 30,772.80 | 107 | 122 | VTNGAFTGEISPGMIK    | K | D | 1,629.84 |
| 688 | TPI1 Isoform 1 of Triosephosphate isomerase                        | IPI00465028                                     | 30,772.80 | 107 | 122 | VTNGAFTGEISPGMIK    | K | D | 1,629.84 |
| 689 | TPI1 Isoform 1 of Triosephosphate isomerase                        | IPI00465028                                     | 30,772.80 | 107 | 122 | VTNGAFTGEISPGMIK    | K | D | 1,629.84 |
| 690 | TPI1 Isoform 1 of Triosephosphate isomerase                        | IPI00465028                                     | 30,772.80 | 107 | 122 | VTNGAFTGEISPGMIK    | K | D | 1,645.83 |
| 691 | HNRNPA1 Isoform A1-B of Heterogeneous nuclear ribonucleoprotein A1 | IPI00215965,IPI00465365                         | 38,828.10 | 107 | 113 | IFVGGIK             | K | E | 741.475  |
| 692 | RPL7 60S ribosomal protein L7                                      | IPI00030179,IPI00472171,IPI00871827,IPI00872387 | 29,209.70 | 107 | 113 | KVLQLLR             | R | L | 877.6074 |
| 693 | RPL7 60S ribosomal protein L7                                      | IPI00030179,IPI00472171,IPI00871827,IPI00872387 | 29,209.70 | 107 | 113 | KVLQLLR             | R | L | 877.6074 |
| 694 | RPL7 60S ribosomal protein L7                                      | IPI00030179,IPI00472171,IPI00871827,IPI00872387 | 29,209.70 | 107 | 113 | KVLQLLR             | R | L | 877.6074 |
| 695 | YWHAE 14-3-3 protein epsilon                                       | IPI00000816                                     | 29,157.00 | 107 | 118 | HLIPAANTGESK        | K | V | 1,245.67 |
| 696 | G3BP1 Ras GTPase-activating protein-binding protein 1              | IPI00012442                                     | 52,144.80 | 108 | 123 | FMQTFVLAPEGSVANK    | R | F | 1,746.90 |
| 697 | G3BP1 Ras GTPase-activating protein-binding protein 1              | IPI00012442                                     | 52,144.80 | 108 | 123 | FMQTFVLAPEGSVANK    | R | F | 1,762.89 |
| 698 | C6orf108 c-Myc-responsive protein Rcl                              | IPI00007926,IPI00395835                         | 19,090.30 | 108 | 114 | AVAFNKR             | R | I | 813.482  |
| 699 | C6orf108 c-Myc-responsive protein Rcl                              | IPI00007926,IPI00395835                         | 19,090.30 | 108 | 114 | AVAFNKR             | R | I | 813.482  |
| 700 | DNAJC9 DnaJ homolog subfamily C member 9                           | IPI00154975                                     | 29,892.30 | 108 | 118 | ISLEDIQAFEK         | K | T | 1,300.69 |
| 701 | PSMA1 Isoform Short of Proteasome subunit alpha type-1             | IPI00016832,IPI00472442                         | 29,538.00 | 108 | 115 | LVSLIGSK            | R | T | 824.5332 |
| 702 | RPL26 60S ribosomal protein L26                                    | IPI00027270,IPI00433834                         | 17,240.40 | 109 | 115 | LKLDKDR             | R | K | 903.5595 |
| 703 | RAB1B Ras-related protein Rab-1B                                   | IPI00008964,IPI00871366,IPI00896425             | 22,154.00 | 109 | 116 | YASENVNK            | R | L | 932.4562 |
| 704 | RAB1B Ras-related protein Rab-1B                                   | IPI00008964,IPI00871366,IPI00896425             | 22,154.00 | 109 | 116 | YASENVNK            | R | L | 932.4562 |

|     |                                                                                   |                                                 |           |     |     |                          |   |   |          |
|-----|-----------------------------------------------------------------------------------|-------------------------------------------------|-----------|-----|-----|--------------------------|---|---|----------|
| 705 | PSMD4 Isoform Rpn10A of 26S proteasome non-ATPase regulatory subunit 4            | IPI00022694,IPI000216247                        | 40,719.20 | 109 | 126 | IIAFVGGSPVEDNEKDLVK      | R | L | 1,989.09 |
| 706 | BAX Isoform Epsilon of Apoptosis regulator BAX                                    | IPI00071059,IPI00443773,IPI00444945,IPI00845474 | 18,111.40 | 110 | 119 | VVALFYFASK               | R | L | 1,152.65 |
| 707 | UBE2S Ubiquitin-conjugating enzyme E2 S                                           | IPI00217949                                     | 23,828.40 | 111 | 117 | HVLLTIK                  | R | C | 831.5543 |
| 708 | UBE2S Ubiquitin-conjugating enzyme E2 S                                           | IPI00217949                                     | 23,828.40 | 111 | 117 | HVLLTIK                  | R | C | 831.5543 |
| 709 | CCDC12 Coiled-coil domain-containing protein 12                                   | IPI00453463                                     | 19,163.20 | 111 | 118 | KPDWDLKR                 | R | D | 1,073.61 |
| 710 | PCNA Proliferating cell nuclear antigen                                           | IPI00021700                                     | 28,751.30 | 111 | 117 | VSDYEMK                  | K | L | 895.3958 |
| 711 | PCNA Proliferating cell nuclear antigen                                           | IPI00021700                                     | 28,751.30 | 111 | 117 | VSDYEMK                  | K | L | 895.3958 |
| 712 | ANP32B Isoform 1 of Acidic leucine-rich nuclear phosphoprotein 32 family member B | IPI00007423,IPI00759824                         | 28,770.60 | 111 | 116 | KLECLK                   | K | S | 806.4777 |
| 713 | RRM2 Ribonucleoside-diphosphate reductase M2 subunit                              | IPI00011118                                     | 51,076.50 | 111 | 119 | IFQEPTPEK                | R | T | 1,096.58 |
| 714 | YWHAG 14-3-3 protein gamma                                                        | IPI00220642                                     | 28,285.10 | 111 | 120 | NCSETQYESK               | K | V | 1,253.52 |
| 715 | YWHAG 14-3-3 protein gamma                                                        | IPI00220642                                     | 28,285.10 | 111 | 120 | NCSETQYESK               | K | V | 1,253.52 |
| 716 | YWHAH 14-3-3 protein eta                                                          | IPI00216319                                     | 28,201.60 | 111 | 120 | NCNDFQYESK               | K | V | 1,312.54 |
| 717 | YWHAG 14-3-3 protein gamma                                                        | IPI00220642                                     | 28,285.10 | 111 | 120 | NCSETQYESK               | K | V | 1,253.52 |
| 718 | YWHAH 14-3-3 protein eta                                                          | IPI00216319                                     | 28,201.60 | 111 | 120 | NCNDFQYESK               | K | V | 1,312.54 |
| 719 | YWHAG 14-3-3 protein gamma                                                        | IPI00220642                                     | 28,285.10 | 111 | 120 | NCSETQYESK               | K | V | 1,253.52 |
| 720 | RPS25 40S ribosomal protein S25                                                   | IPI00012750                                     | 13,725.00 | 112 | 125 | NTKGGDAPAAGEDA           | R | - | 1,281.58 |
| 721 | RPS25 40S ribosomal protein S25                                                   | IPI00012750                                     | 13,725.00 | 112 | 125 | NTKGGDAPAAGEDA           | R | - | 1,281.58 |
| 722 | THEM2 Thioesterase superfamily member 2                                           | IPI00020530                                     | 14,942.60 | 112 | 123 | TLAFTSVDLTNK             | K | A | 1,317.71 |
| 723 | SNRNPB2 U2 small nuclear ribonucleoprotein B"                                     | IPI00029267                                     | 25,469.50 | 112 | 122 | TVEQTATTTNK              | K | K | 1,201.62 |
| 724 | SNRNPB2 U2 small nuclear ribonucleoprotein B"                                     | IPI00029267                                     | 25,469.50 | 112 | 122 | TVEQTATTTNK              | K | K | 1,201.62 |
| 725 | SNRNPB2 U2 small nuclear ribonucleoprotein B"                                     | IPI00029267                                     | 25,469.50 | 112 | 122 | TVEQTATTTNK              | K | K | 1,201.62 |
| 726 | RAB1A Isoform 1 of Ras-related protein Rab-1A                                     | IPI00005719,IPI00873902                         | 22,660.40 | 112 | 119 | YASENVNK                 | R | L | 932.4562 |
| 727 | CACYBP Isoform 1 of Calcyclin-binding protein                                     | IPI00395627,IPI00552308                         | 26,192.30 | 112 | 118 | SFDLLVK                  | R | N | 829.491  |
| 728 | CACYBP Isoform 1 of Calcyclin-binding protein                                     | IPI00395627,IPI00552308                         | 26,192.30 | 112 | 118 | SFDLLVK                  | R | N | 829.491  |
| 729 | RAB18 Ras-related protein Rab-18                                                  | IPI00014577                                     | 22,959.50 | 113 | 123 | NDIVNMLVGNK              | R | I | 1,224.65 |
| 730 | HMGB1 High mobility group protein B1                                              | IPI00419258                                     | 24,876.70 | 113 | 127 | IKGEHPGLSIGDVAK          | K | K | 1,536.87 |
| 731 | HMGB1 High mobility group protein B1                                              | IPI00419258                                     | 24,876.70 | 113 | 127 | IKGEHPGLSIGDVAK          | K | K | 1,536.87 |
| 732 | HMGB2 High mobility group protein B2                                              | IPI00219097                                     | 24,016.60 | 113 | 128 | IKSEHPGLSIGDTAKK         | K | L | 1,704.97 |
| 733 | HSPA8 Isoform 1 of Heat shock cognate 71 kDa protein                              | IPI00003865                                     | 70,881.80 | 113 | 126 | SFYPEEVSSMVLTK           | K | M | 1,640.80 |
| 734 | HSPA8 Isoform 1 of Heat shock cognate 71 kDa protein                              | IPI00003865                                     | 70,881.80 | 113 | 126 | SFYPEEVSSMVLTK           | K | M | 1,624.80 |
| 735 | HSPA8 Isoform 1 of Heat shock cognate 71 kDa protein                              | IPI00003865                                     | 70,881.80 | 113 | 126 | SFYPEEVSSMVLTK           | K | M | 1,624.80 |
| 736 | HSPA1A;HSPA1B Heat shock 70 kDa protein 1                                         | IPI00304925                                     | 70,036.00 | 113 | 126 | AFYPEEISSMVLTK           | K | M | 1,622.82 |
| 737 | RPLP0 60S acidic ribosomal protein P0                                             | IPI00008530                                     | 34,256.30 | 113 | 134 | AGAIAPEVTVPAQNTGLGPE R K | R | T | 2,188.12 |
| 738 | RPL23 60S ribosomal protein L23                                                   | IPI00010153,IPI00795408                         | 14,847.90 | 114 | 123 | GSAITGPVAK               | K | E | 908.5292 |
| 739 | RAB7A Ras-related protein Rab-7a                                                  | IPI00016342                                     | 23,472.00 | 114 | 126 | DPENFPFVVLGNK            | R | I | 1,483.77 |
| 740 | RAB7A Ras-related protein Rab-7a                                                  | IPI00016342                                     | 23,472.00 | 114 | 126 | DPENFPFVVLGNK            | R | I | 1,483.77 |
| 741 | SKP1 Isoform 1 of S-phase kinase-associated protein 1                             | IPI00301364                                     | 18,640.30 | 114 | 121 | GLLDVTCK                 | K | T | 913.4905 |
| 742 | SKP1 Isoform 1 of S-phase kinase-associated protein 1                             | IPI00301364                                     | 18,640.30 | 114 | 121 | GLLDVTCK                 | K | T | 913.4905 |
| 743 | UCHL1 Ubiquitin carboxyl-terminal hydrolase isozyyme L1                           | IPI00018352                                     | 24,806.30 | 116 | 129 | QFLSETEKMSPEDR           | K | A | 1,720.79 |
| 744 | C14orf166 UPF0568 protein C14orf166                                               | IPI00006980                                     | 28,051.30 | 116 | 131 | NAEPLINLDVNNPDFK         | K | A | 1,820.93 |
| 745 | YWHAZ 14-3-3 protein zeta/delta                                                   | IPI00021263                                     | 27,727.90 | 116 | 120 | VFYLK                    | K | M | 677.4112 |
| 746 | YWHAQ 14-3-3 protein theta                                                        | IPI00018146                                     | 27,747.40 | 116 | 120 | VFYLK                    | K | M | 677.4112 |
| 747 | YWHAZ 14-3-3 protein zeta/delta                                                   | IPI00021263                                     | 27,727.90 | 116 | 120 | VFYLK                    | K | M | 677.4112 |
| 748 | YWHAQ 14-3-3 protein theta                                                        | IPI00018146                                     | 27,747.40 | 116 | 120 | VFYLK                    | K | M | 677.4112 |
| 749 | RPL27 60S ribosomal protein L27                                                   | IPI00219155                                     | 15,780.40 | 116 | 121 | VKFEER                   | K | Y | 815.4501 |
| 750 | YWHAB Isoform Long of 14-3-3 protein beta/alpha                                   | IPI00216318,IPI00759832                         | 28,065.10 | 118 | 122 | VFYLK                    | K | M | 677.4112 |

|     |                                                                                |                                     |           |     |     |                                  |   |   |          |
|-----|--------------------------------------------------------------------------------|-------------------------------------|-----------|-----|-----|----------------------------------|---|---|----------|
| 751 | YWHAB Isoform Long of 14-3-3 protein beta/alpha                                | IPI00216318,IPI00759832             | 28,065.10 | 118 | 122 | VFYLK                            | K | M | 677.4112 |
| 752 | ARF3 ADP-ribosylation factor 3                                                 | IPI00215917                         | 20,583.70 | 118 | 127 | DAVLLVFANK                       | R | Q | 1,097.64 |
| 753 | ARF3 ADP-ribosylation factor 3                                                 | IPI00215917                         | 20,583.70 | 118 | 127 | DAVLLVFANK                       | R | Q | 1,097.64 |
| 754 | ST13 Hsc70-interacting protein                                                 | IPI00032826                         | 41,314.40 | 119 | 132 | VAAIEALNDGELQK                   | K | A | 1,478.79 |
| 755 | ST13 Hsc70-interacting protein                                                 | IPI00032826                         | 41,314.40 | 119 | 132 | VAAIEALNDGELQK                   | K | A | 1,478.79 |
| 756 | ST13 Hsc70-interacting protein                                                 | IPI00032826                         | 41,314.40 | 119 | 132 | VAAIEALNDGELQK                   | K | A | 1,478.79 |
| 757 | ST13 Hsc70-interacting protein                                                 | IPI00032826                         | 41,314.40 | 119 | 132 | VAAIEALNDGELQK                   | K | A | 1,478.79 |
| 758 | PPIA Peptidyl-prolyl cis-trans isomerase A                                     | IPI00419585,IPI00887678             | 17,994.90 | 119 | 131 | TEWLDGKHHVVFQK                   | K | V | 1,531.82 |
| 759 | PPIA Peptidyl-prolyl cis-trans isomerase A                                     | IPI00419585,IPI00887678             | 17,994.90 | 119 | 131 | TEWLDGKHHVVFQK                   | K | V | 1,531.82 |
| 760 | FSCN1 Fascin                                                                   | IPI00163187,IPI00747810             | 54,512.30 | 119 | 131 | LSCFAQTVSPAQK                    | R | W | 1,445.72 |
| 761 | YBX1 Nuclease-sensitive element-binding protein 1                              | IPI00031812,IPI00643351             | 35,905.70 | 119 | 137 | GAEAAVNTGPGGVPVQGSK              | K | Y | 1,703.88 |
| 762 | CLIC1 Chloride intracellular channel protein 1                                 | IPI00010896                         | 26,905.30 | 120 | 131 | NSNPALNDNLEK                     | K | G | 1,336.66 |
| 763 | RPL18 60S ribosomal protein L18                                                | IPI00215719                         | 21,617.20 | 120 | 132 | ILTFDQLALDSPK                    | K | G | 1,468.81 |
| 764 | CLIC1 Chloride intracellular channel protein 1                                 | IPI00010896                         | 26,905.30 | 120 | 131 | NSNPALNDNLEK                     | K | G | 1,336.66 |
| 765 | YWHAG 14-3-3 protein gamma                                                     | IPI00220642                         | 28,285.10 | 121 | 125 | VFYLK                            | K | M | 677.4112 |
| 766 | YWHAG 14-3-3 protein eta                                                       | IPI00216319                         | 28,201.60 | 121 | 125 | VFYLK                            | K | M | 677.4112 |
| 767 | YWHAG 14-3-3 protein gamma                                                     | IPI00220642                         | 28,285.10 | 121 | 125 | VFYLK                            | K | M | 677.4112 |
| 768 | OCIAD1 Isoform 1 of OCIA domain-containing protein 1                           | IPI00016405                         | 27,608.80 | 121 | 131 | RSSPPGHYYQK                      | R | S | 1,327.66 |
| 769 | OCIAD1 Isoform 1 of OCIA domain-containing protein 1                           | IPI00016405                         | 27,608.80 | 121 | 131 | RSSPPGHYYQK                      | R | S | 1,327.66 |
| 770 | YWHAZ 14-3-3 protein zeta/delta                                                | IPI00021263                         | 27,727.90 | 121 | 127 | MKGDYYR                          | K | Y | 940.4437 |
| 771 | NDUFB10 NADH dehydrogenase [ubiquinone] 1 beta subcomplex subunit 10           | IPI00479905                         | 20,758.70 | 122 | 131 | EVEQFTQVAK                       | K | A | 1,186.62 |
| 772 | BASP1 Brain acid soluble protein 1                                             | IPI00299024                         | 22,675.30 | 122 | 149 | AAEAAAAPAESAAPAAGEEPS<br>KEEGEPK | K | K | 2,652.26 |
| 773 | GSTP1 Glutathione S-transferase P                                              | IPI00219757                         | 23,338.70 | 122 | 141 | ALPGQLKPFETLLSQNGGK              | K | T | 2,142.19 |
| 774 | GSTP1 Glutathione S-transferase P                                              | IPI00219757                         | 23,338.70 | 122 | 141 | ALPGQLKPFETLLSQNGGK              | K | T | 2,142.19 |
| 775 | PPP2CA Serine/threonine-protein phosphatase 2A catalytic subunit alpha isoform | IPI00008380                         | 35,576.50 | 122 | 136 | QITQVYGFYDECLRK                  | R | Y | 1,927.95 |
| 776 | MAGOHB Protein mago nashi homolog 2                                            | IPI00059292,IPI00219306             | 17,258.60 | 123 | 132 | VFYYLVQDLK                       | R | C | 1,295.71 |
| 777 | MAGOHB Protein mago nashi homolog 2                                            | IPI00059292,IPI00219306             | 17,258.60 | 123 | 132 | VFYYLVQDLK                       | R | C | 1,295.71 |
| 778 | PTBP1 Isoform 1 of Polypyrimidine tract-binding protein 1                      | IPI00179964,IPI00183626,IPI00334175 | 57,204.50 | 123 | 134 | GQPIYIQFSNHK                     | R | E | 1,439.75 |
| 779 | BTF3 Isoform 1 of Transcription factor BTF3                                    | IPI00221035                         | 22,150.30 | 123 | 141 | VQASLAANTFTITGHAETK              | K | Q | 1,968.03 |
| 780 | BTF3 Isoform 1 of Transcription factor BTF3                                    | IPI00221035                         | 22,150.30 | 123 | 141 | VQASLAANTFTITGHAETK              | K | Q | 1,968.03 |
| 781 | BTF3 Isoform 1 of Transcription factor BTF3                                    | IPI00221035                         | 22,150.30 | 123 | 141 | VQASLAANTFTITGHAETK              | K | Q | 1,968.03 |
| 782 | UFD1L Isoform Short of Ubiquitin fusion degradation protein 1 homolog          | IPI00218292,IPI00655754,IPI00873326 | 34,483.20 | 125 | 139 | FQPQSPDFLDITNPK                  | K | A | 1,754.88 |
| 783 | PSMD13 proteasome 26S non-ATPase subunit 13 isoform 2                          | IPI00375380,IPI00549672             | 42,924.90 | 125 | 134 | LNIGDLQVTK                       | K | E | 1,108.65 |
| 784 | CDC123 Cell division cycle protein 123 homolog                                 | IPI00005670,IPI00514175             | 39,118.10 | 126 | 135 | TLSDIFLLFK                       | K | S | 1,204.71 |
| 785 | MDH1 Malate dehydrogenase, cytoplasmic                                         | IPI00291005,IPI00915869             | 36,408.90 | 126 | 142 | VIVVGNPANTNCLTASK                | K | S | 1,765.94 |
| 786 | YWHAG 14-3-3 protein gamma                                                     | IPI00220642                         | 28,285.10 | 126 | 132 | MKGDYYR                          | K | Y | 940.4437 |
| 787 | YWHAH 14-3-3 protein eta                                                       | IPI00216319                         | 28,201.60 | 126 | 132 | MKGDYYR                          | K | Y | 940.4437 |
| 788 | CCT7 T-complex protein 1 subunit eta                                           | IPI00018465                         | 59,349.80 | 127 | 135 | TATQLAVNK                        | R | I | 953.5506 |
| 789 | CCT7 T-complex protein 1 subunit eta                                           | IPI00018465                         | 59,349.80 | 127 | 135 | TATQLAVNK                        | R | I | 953.5506 |
| 790 | CCT7 T-complex protein 1 subunit eta                                           | IPI00018465                         | 59,349.80 | 127 | 135 | TATQLAVNK                        | R | I | 953.5506 |
| 791 | CCT7 T-complex protein 1 subunit eta                                           | IPI00018465                         | 59,349.80 | 127 | 135 | TATQLAVNK                        | R | I | 953.5506 |
| 792 | CCT7 T-complex protein 1 subunit eta                                           | IPI00018465                         | 59,349.80 | 127 | 135 | TATQLAVNK                        | R | I | 953.5506 |
| 793 | NAT13 Isoform 1 of N-acetyltransferase 13                                      | IPI00018627                         | 19,380.90 | 127 | 135 | FGFEIETK                         | K | K | 1,091.59 |
| 794 | HNRNPA0 Heterogeneous nuclear ribonucleoprotein A0                             | IPI00011913                         | 30,822.50 | 127 | 137 | AEIADKQSGK                       | K | K | 1,175.66 |
| 795 | HNRNPA0 Heterogeneous nuclear ribonucleoprotein A0                             | IPI00011913                         | 30,822.50 | 127 | 137 | AEIADKQSGK                       | K | K | 1,175.66 |
| 796 | BUB3 Mitotic checkpoint protein BUB3                                           | IPI00013468,IPI00514701,IPI00644108 | 37,136.70 | 127 | 139 | TPCNAGTFSQPEK                    | R | V | 1,444.66 |

|     |                                                                      |                                     |           |     |     |                      |   |   |          |
|-----|----------------------------------------------------------------------|-------------------------------------|-----------|-----|-----|----------------------|---|---|----------|
| 797 | BUB3 Mitotic checkpoint protein BUB3                                 | IPI00013468,IPI00514701,IPI00644108 | 37,136.70 | 127 | 139 | TPCNAGTFSQPEK        | R | V | 1,444.66 |
| 798 | BUB3 Mitotic checkpoint protein BUB3                                 | IPI00013468,IPI00514701,IPI00644108 | 37,136.70 | 127 | 139 | TPCNAGTFSQPEK        | R | V | 1,444.66 |
| 799 | BUB3 Mitotic checkpoint protein BUB3                                 | IPI00013468,IPI00514701,IPI00644108 | 37,136.70 | 127 | 139 | TPCNAGTFSQPEK        | R | V | 1,444.66 |
| 800 | HNRNPA3 Isoform 1 of Heterogeneous nuclear ribonucleoprotein A3      | IPI00419373                         | 39,577.10 | 128 | 143 | IFVGGIKEDTEEYNLR     | K | D | 1,890.97 |
| 801 | HNRNPA3 Isoform 1 of Heterogeneous nuclear ribonucleoprotein A3      | IPI00419373                         | 39,577.10 | 128 | 134 | IFVGGIK              | K | E | 741.475  |
| 802 | YWHAZ 14-3-3 protein zeta/delta                                      | IPI00021263                         | 27,727.90 | 128 | 139 | YLAEVAAGDDKK         | R | G | 1,295.68 |
| 803 | YWHAZ 14-3-3 protein zeta/delta                                      | IPI00021263                         | 27,727.90 | 128 | 139 | YLAEVAAGDDKK         | R | G | 1,295.68 |
| 804 | YWHAZ 14-3-3 protein zeta/delta                                      | IPI00021263                         | 27,727.90 | 128 | 139 | YLAEVAAGDDKK         | R | G | 1,295.68 |
| 805 | YWHAZ 14-3-3 protein zeta/delta                                      | IPI00021263                         | 27,727.90 | 128 | 139 | YLAEVAAGDDKK         | R | G | 1,295.68 |
| 806 | YWHAZ 14-3-3 protein zeta/delta                                      | IPI00021263                         | 27,727.90 | 128 | 139 | YLAEVAAGDDKK         | R | G | 1,295.68 |
| 807 | YWHAZ 14-3-3 protein zeta/delta                                      | IPI00021263                         | 27,727.90 | 128 | 138 | YLAEVAAGDDK          | R | K | 1,159.57 |
| 808 | ARF3 ADP-ribosylation factor 3                                       | IPI00215917                         | 20,583.70 | 128 | 142 | QDLPNAMNAAEITDK      | K | L | 1,654.78 |
| 809 | ARF3 ADP-ribosylation factor 3                                       | IPI00215917                         | 20,583.70 | 128 | 142 | QDLPNAMNAAEITDK      | K | L | 1,654.78 |
| 810 | YWHAQ 14-3-3 protein theta                                           | IPI00018146                         | 27,747.40 | 128 | 139 | YLAEVACGDDRK         | R | Q | 1,404.67 |
| 811 | YWHAQ 14-3-3 protein theta                                           | IPI00018146                         | 27,747.40 | 128 | 139 | YLAEVACGDDRK         | R | Q | 1,404.67 |
| 812 | YWHAQ 14-3-3 protein theta                                           | IPI00018146                         | 27,747.40 | 128 | 139 | YLAEVACGDDRK         | R | Q | 1,404.67 |
| 813 | YWHAQ 14-3-3 protein theta                                           | IPI00018146                         | 27,747.40 | 128 | 139 | YLAEVACGDDRK         | R | Q | 1,404.67 |
| 814 | ILF2 Interleukin enhancer-binding factor 2                           | IPI00005198,IPI00872107             | 43,044.70 | 128 | 141 | ILPTLEAVAALGNK       | K | V | 1,417.85 |
| 815 | ILF2 Interleukin enhancer-binding factor 2                           | IPI00005198,IPI00872107             | 43,044.70 | 128 | 141 | ILPTLEAVAALGNK       | K | V | 1,417.85 |
| 816 | GSTK1 Glutathione S-transferase kappa 1                              | IPI00219673,IPI00917331             | 25,480.10 | 129 | 144 | NEDITEPQSILAAAEK     | R | A | 1,736.88 |
| 817 | PRDX1 Peroxiredoxin-1                                                | IPI00000874,IPI00640741             | 22,092.90 | 129 | 140 | GLFIIDDKGILR         | R | Q | 1,367.81 |
| 818 | CMPK1 cytidine monophosphate (UMP-CMP) kinase 1, cytosolic isoform a | IPI00219953,IPI00909419             | 25,837.80 | 129 | 138 | NQDNLQGWNK           | R | T | 1,224.58 |
| 819 | YWHAB Isoform Long of 14-3-3 protein beta/alpha                      | IPI00216318,IPI00759832             | 28,065.10 | 130 | 140 | YLSEVASGDNK          | R | Q | 1,190.58 |
| 820 | YWHAB Isoform Long of 14-3-3 protein beta/alpha                      | IPI00216318,IPI00759832             | 28,065.10 | 130 | 140 | YLSEVASGDNK          | R | Q | 1,190.58 |
| 821 | YWHAB Isoform Long of 14-3-3 protein beta/alpha                      | IPI00216318,IPI00759832             | 28,065.10 | 130 | 140 | YLSEVASGDNK          | R | Q | 1,190.58 |
| 822 | YWHAB Isoform Long of 14-3-3 protein beta/alpha                      | IPI00216318,IPI00759832             | 28,065.10 | 130 | 140 | YLSEVASGDNK          | R | Q | 1,190.58 |
| 823 | YWHAE 14-3-3 protein epsilon                                         | IPI00000816                         | 29,157.00 | 131 | 142 | YLAEFATGNDRK         | R | E | 1,392.70 |
| 824 | YWHAE 14-3-3 protein epsilon                                         | IPI00000816                         | 29,157.00 | 131 | 142 | YLAEFATGNDRK         | R | E | 1,392.70 |
| 825 | YWHAE 14-3-3 protein epsilon                                         | IPI00000816                         | 29,157.00 | 131 | 142 | YLAEFATGNDRK         | R | E | 1,392.70 |
| 826 | PPIA Peptidyl-prolyl cis-trans isomerase A                           | IPI00419585,IPI00887678             | 17,994.90 | 132 | 144 | VKEGMNIVEAMER        | K | F | 1,529.75 |
| 827 | PPIA Peptidyl-prolyl cis-trans isomerase A                           | IPI00419585,IPI00887678             | 17,994.90 | 132 | 144 | VKEGMNIVEAMER        | K | F | 1,529.75 |
| 828 | UCHL1 Ubiquitin carboxyl-terminal hydrolase isozyme L1               | IPI00018352                         | 24,806.30 | 132 | 153 | CFEKNEAIQAAHDAVAQEGQ | K | V | 2,540.15 |
| 829 | UCHL1 Ubiquitin carboxyl-terminal hydrolase isozyme L1               | IPI00018352                         | 24,806.30 | 132 | 153 | CFEKNEAIQAAHDAVAQEGQ | K | V | 2,540.15 |
| 830 | YWHAG 14-3-3 protein gamma                                           | IPI00220642                         | 28,285.10 | 133 | 143 | YLAEVATGEKR          | R | A | 1,244.67 |
| 831 | YWHAG 14-3-3 protein gamma                                           | IPI00220642                         | 28,285.10 | 133 | 143 | YLAEVATGEKR          | R | A | 1,244.67 |
| 832 | YWHAG 14-3-3 protein gamma                                           | IPI00220642                         | 28,285.10 | 133 | 143 | YLAEVATGEKR          | R | A | 1,244.67 |
| 833 | RAC1 Isoform A of Ras-related C3 botulinum toxin substrate 1         | IPI00010271,IPI00219675             | 21,432.60 | 133 | 147 | KLTPITYPQGLAMAK      | K | E | 1,663.94 |
| 834 | PRDX6 Peroxiredoxin-6                                                | IPI00220301                         | 25,018.10 | 133 | 142 | VVVFVFGPDKK          | R | L | 1,151.68 |
| 835 | YWHAG 14-3-3 protein gamma                                           | IPI00220642                         | 28,285.10 | 133 | 142 | YLAEVATGEK           | R | R | 1,088.57 |
| 836 | YWHAG 14-3-3 protein gamma                                           | IPI00220642                         | 28,285.10 | 133 | 142 | YLAEVATGEK           | R | R | 1,088.57 |
| 837 | RPS19 40S ribosomal protein S19                                      | IPI00215780                         | 16,042.50 | 134 | 143 | IAGQVAAANK           | R | K | 950.5509 |
| 838 | RPS19 40S ribosomal protein S19                                      | IPI00215780                         | 16,042.50 | 134 | 143 | IAGQVAAANK           | R | K | 950.5509 |
| 839 | PTBP1 Isoform 1 of Polypyrimidine tract-binding protein 1            | IPI00179964,IPI00183626,IPI00334175 | 57,204.50 | 135 | 146 | ELKTDSSPNQAR         | K | A | 1,353.68 |
| 840 | RPLP0 60S acidic ribosomal protein P0                                | IPI00008530                         | 34,256.30 | 135 | 146 | TSFFQALGITTK         | K | I | 1,321.72 |
| 841 | RPLP0 60S acidic ribosomal protein P0                                | IPI00008530                         | 34,256.30 | 135 | 146 | TSFFQALGITTK         | K | I | 1,321.72 |
| 842 | RPLP0 60S acidic ribosomal protein P0                                | IPI00008530                         | 34,256.30 | 135 | 146 | TSFFQALGITTK         | K | I | 1,321.72 |
| 843 | EEF1A1 Elongation factor 1-alpha 1                                   | IPI00396485,IPI00472724             | 50,123.20 | 135 | 146 | EHALLAYTLGVK         | R | Q | 1,322.76 |
| 844 | EEF1A1 Elongation factor 1-alpha 1                                   | IPI00396485,IPI00472724             | 50,123.20 | 135 | 146 | EHALLAYTLGVK         | R | Q | 1,322.76 |

|     |                                                                                |                                                 |            |     |     |                     |   |   |          |
|-----|--------------------------------------------------------------------------------|-------------------------------------------------|------------|-----|-----|---------------------|---|---|----------|
| 845 | EEF1A1 Elongation factor 1-alpha 1                                             | IPI00396485,IPI00472724                         | 50,123.20  | 135 | 146 | EHALLAYTLGVK        | R | Q | 1,322.76 |
| 846 | EEF1A1 Elongation factor 1-alpha 1                                             | IPI00396485,IPI00472724                         | 50,123.20  | 135 | 146 | EHALLAYTLGVK        | R | Q | 1,322.76 |
| 847 | NPM1 Isoform 1 of Nucleophosmin                                                | IPI00549248                                     | 32,557.40  | 135 | 142 | LLSIGSKR            | K | S | 881.5659 |
| 848 | RPL7 60S ribosomal protein L7                                                  | IPI00030179,IPI00472171,IPI00871827,IPI00872387 | 29,209.70  | 135 | 148 | IVEPYIAWGYPNLK      | R | S | 1,670.90 |
| 849 | RPL7 60S ribosomal protein L7                                                  | IPI00030179,IPI00472171,IPI00871827,IPI00872387 | 29,209.70  | 135 | 148 | IVEPYIAWGYPNLK      | R | S | 1,670.90 |
| 850 | NPM1 Isoform 1 of Nucleophosmin                                                | IPI00549248                                     | 32,557.40  | 135 | 142 | LLSIGSKR            | K | S | 881.5659 |
| 851 | RPL7 60S ribosomal protein L7                                                  | IPI00030179,IPI00472171,IPI00871827,IPI00872387 | 29,209.70  | 135 | 148 | IVEPYIAWGYPNLK      | R | S | 1,670.90 |
| 852 | RPL7 60S ribosomal protein L7                                                  | IPI00030179,IPI00472171,IPI00871827,IPI00872387 | 29,209.70  | 135 | 148 | IVEPYIAWGYPNLK      | R | S | 1,670.90 |
| 853 | GNPNAT1 Glucosamine 6-phosphate N-acetyltransferase                            | IPI00061525                                     | 20,731.30  | 136 | 146 | LLLSTLTLLSK         | K | K | 1,209.79 |
| 854 | GNPNAT1 Glucosamine 6-phosphate N-acetyltransferase                            | IPI00061525                                     | 20,731.30  | 136 | 146 | LLLSTLTLLSK         | K | K | 1,209.79 |
| 855 | CCT7 T-complex protein 1 subunit eta                                           | IPI00018465                                     | 59,349.80  | 136 | 144 | IKEIAVTVK           | K | K | 1,016.67 |
| 856 | RPL13 60S ribosomal protein L13                                                | IPI00465361                                     | 24,244.20  | 136 | 145 | KGDSSAEELK          | K | L | 1,079.56 |
| 857 | RPL13 60S ribosomal protein L13                                                | IPI00465361                                     | 24,244.20  | 136 | 145 | KGDSSAEELK          | K | L | 1,079.56 |
| 858 | ARL2BP Isoform 1 of ADP-ribosylation factor-like protein 2-binding protein     | IPI00015866,IPI00845377                         | 18,805.20  | 136 | 150 | GLDLSSGLVVTSLCK     | R | S | 1,556.84 |
| 859 | EIF2B1 Translation initiation factor eIF-2B subunit alpha                      | IPI00221300                                     | 33,695.20  | 137 | 145 | VLEAAVAAK           | R | K | 879.5389 |
| 860 | RAP1B Ras-related protein Rap-1b                                               | IPI00015148,IPI00796349,IPI00908754,IPI00910592 | 20,806.90  | 137 | 149 | QWNNCAFLESSAK       | R | S | 1,562.71 |
| 861 | RAP1B Ras-related protein Rap-1b                                               | IPI00015148,IPI00796349,IPI00908754,IPI00910592 | 20,806.90  | 137 | 149 | QWNNCAFLESSAK       | R | S | 1,562.71 |
| 862 | TPI1 Isoform 1 of Triosephosphate isomerase                                    | IPI00465028                                     | 30,772.80  | 137 | 150 | RHVFGESDELIGQK      | R | V | 1,622.84 |
| 863 | TPI1 Isoform 1 of Triosephosphate isomerase                                    | IPI00465028                                     | 30,772.80  | 137 | 150 | RHVFGESDELIGQK      | R | V | 1,622.84 |
| 864 | TPI1 Isoform 1 of Triosephosphate isomerase                                    | IPI00465028                                     | 30,772.80  | 137 | 150 | RHVFGESDELIGQK      | R | V | 1,622.84 |
| 865 | TPI1 Isoform 1 of Triosephosphate isomerase                                    | IPI00465028                                     | 30,772.80  | 137 | 150 | RHVFGESDELIGQK      | R | V | 1,622.84 |
| 866 | PPP2CA Serine/threonine-protein phosphatase 2A catalytic subunit alpha isoform | IPI00008380                                     | 35,576.50  | 137 | 144 | YGNANVWK            | K | Y | 959.4824 |
| 867 | MTHFD1 C-1-tetrahydrofolate synthase, cytoplasmic                              | IPI00218342,IPI00794900                         | 101,543.50 | 138 | 150 | GDLNDCFIPCTPK       | R | G | 1,544.70 |
| 868 | RAB1B Ras-related protein Rab-1B                                               | IPI00008964,IPI00871366,IPI00896425             | 22,154.00  | 138 | 153 | EFADSLGIPFLETSK     | K | N | 1,732.89 |
| 869 | RAB1B Ras-related protein Rab-1B                                               | IPI00008964,IPI00871366,IPI00896425             | 22,154.00  | 138 | 153 | EFADSLGIPFLETSK     | K | N | 1,732.89 |
| 870 | TPI1 Isoform 1 of Triosephosphate isomerase                                    | IPI00465028                                     | 30,772.80  | 138 | 150 | HVFGESDELIGQK       | R | V | 1,466.74 |
| 871 | TPI1 Isoform 1 of Triosephosphate isomerase                                    | IPI00465028                                     | 30,772.80  | 138 | 150 | HVFGESDELIGQK       | R | V | 1,466.74 |
| 872 | TPI1 Isoform 1 of Triosephosphate isomerase                                    | IPI00465028                                     | 30,772.80  | 138 | 150 | HVFGESDELIGQK       | R | V | 1,466.74 |
| 873 | TPI1 Isoform 1 of Triosephosphate isomerase                                    | IPI00465028                                     | 30,772.80  | 138 | 150 | HVFGESDELIGQK       | R | V | 1,466.74 |
| 874 | SLC25A5 ADP/ATP translocase 2                                                  | IPI00007188                                     | 32,878.50  | 139 | 147 | TRLAADV GK          | R | A | 938.551  |
| 875 | YWHAQ 14-3-3 protein theta                                                     | IPI00018146                                     | 27,747.40  | 139 | 158 | KQTIDNSQGAYQEAFDISK | R | E | 2,295.17 |
| 876 | YWHAQ 14-3-3 protein theta                                                     | IPI00018146                                     | 27,747.40  | 139 | 158 | KQTIDNSQGAYQEAFDISK | R | E | 2,295.17 |
| 877 | RPS10 40S ribosomal protein S10                                                | IPI00008438                                     | 18,880.30  | 139 | 153 | KAEAGAGSATEFQFR     | K | G | 1,577.78 |
| 878 | RPS10 40S ribosomal protein S10                                                | IPI00008438                                     | 18,880.30  | 139 | 153 | KAEAGAGSATEFQFR     | K | G | 1,577.78 |
| 879 | RAB7A Ras-related protein Rab-7a                                               | IPI00016342                                     | 23,472.00  | 139 | 146 | AQAWCYSK            | R | N | 1,021.47 |
| 880 | YWHAQ 14-3-3 protein theta                                                     | IPI00018146                                     | 27,747.40  | 140 | 158 | QTIDNSQGAYQEAFDISK  | K | E | 2,159.06 |
| 881 | YWHAQ 14-3-3 protein theta                                                     | IPI00018146                                     | 27,747.40  | 140 | 158 | QTIDNSQGAYQEAFDISK  | K | E | 2,159.06 |
| 882 | RPL23A;hCG_16001 60S ribosomal protein L23a                                    | IPI00021266                                     | 17,678.20  | 140 | 152 | LAPDYDALDVANK       | R | I | 1,412.71 |
| 883 | RPL23A;hCG_16001 60S ribosomal protein L23a                                    | IPI00021266                                     | 17,678.20  | 140 | 152 | LAPDYDALDVANK       | R | I | 1,412.71 |
| 884 | RPL23A;hCG_16001 60S ribosomal protein L23a                                    | IPI00021266                                     | 17,678.20  | 140 | 152 | LAPDYDALDVANK       | R | I | 1,412.71 |
| 885 | YWHAZ 14-3-3 protein zeta/delta                                                | IPI00021263                                     | 27,727.90  | 140 | 157 | GIVDQSQAYQEAFEISK   | K | K | 2,049.00 |
| 886 | YWHAQ 14-3-3 protein theta                                                     | IPI00018146                                     | 27,747.40  | 140 | 157 | QTIDNSQGAYQEAFDISK  | K | K | 2,022.95 |
| 887 | YWHAZ 14-3-3 protein zeta/delta                                                | IPI00021263                                     | 27,727.90  | 140 | 157 | GIVDQSQAYQEAFEISK   | K | K | 2,049.00 |
| 888 | YWHAQ 14-3-3 protein theta                                                     | IPI00018146                                     | 27,747.40  | 140 | 157 | QTIDNSQGAYQEAFDISK  | K | K | 2,022.95 |
| 889 | YWHAZ 14-3-3 protein zeta/delta                                                | IPI00021263                                     | 27,727.90  | 140 | 157 | GIVDQSQAYQEAFEISK   | K | K | 2,049.00 |
| 890 | YWHAQ 14-3-3 protein theta                                                     | IPI00018146                                     | 27,747.40  | 140 | 157 | QTIDNSQGAYQEAFDISK  | K | K | 2,022.95 |
| 891 | YWHAZ 14-3-3 protein zeta/delta                                                | IPI00021263                                     | 27,727.90  | 140 | 157 | GIVDQSQAYQEAFEISK   | K | K | 2,049.00 |
| 892 | YWHAQ 14-3-3 protein theta                                                     | IPI00018146                                     | 27,747.40  | 140 | 157 | QTIDNSQGAYQEAFDISK  | K | K | 2,022.95 |
| 893 | SLC25A5 ADP/ATP translocase 2                                                  | IPI00007188                                     | 32,878.50  | 141 | 147 | LAADV GK            | R | A | 681.4022 |

|     |                                                                                            |                         |           |     |     |                                   |   |   |          |
|-----|--------------------------------------------------------------------------------------------|-------------------------|-----------|-----|-----|-----------------------------------|---|---|----------|
| 894 | SLC25A5 ADP/ATP translocase 2                                                              | IPI00007188             | 32,878.50 | 141 | 147 | LAADV GK                          | R | A | 681.4022 |
| 895 | SLC25A5 ADP/ATP translocase 2                                                              | IPI00007188             | 32,878.50 | 141 | 147 | LAADV GK                          | R | A | 681.4022 |
| 896 | YWHAB Isoform Long of 14-3-3 protein beta/alpha                                            | IPI00216318,IPI00759832 | 28,065.10 | 141 | 160 | QTTVSN SQAYQEAFEISK               | K | E | 2,303.15 |
| 897 | YWHAB Isoform Long of 14-3-3 protein beta/alpha                                            | IPI00216318,IPI00759832 | 28,065.10 | 141 | 159 | QTTVSN SQAYQEAFEISK               | K | K | 2,167.04 |
| 898 | YWHAB Isoform Long of 14-3-3 protein beta/alpha                                            | IPI00216318,IPI00759832 | 28,065.10 | 141 | 159 | QTTVSN SQAYQEAFEISK               | K | K | 2,167.04 |
| 899 | NAT13 Isoform 1 of N-acetyltransferase 13                                                  | IPI00018627             | 19,380.90 | 141 | 152 | RIEPADAHVLQK                      | K | N | 1,384.78 |
| 900 | RAB1A Isoform 1 of Ras-related protein Rab-1A                                              | IPI00005719,IPI00873902 | 22,660.40 | 141 | 156 | EFADSLGIPFLETS AK                 | K | N | 1,732.89 |
| 901 | NAT13 Isoform 1 of N-acetyltransferase 13                                                  | IPI00018627             | 19,380.90 | 141 | 152 | RIEPADAHVLQK                      | K | N | 1,384.78 |
| 902 | NAT13 Isoform 1 of N-acetyltransferase 13                                                  | IPI00018627             | 19,380.90 | 141 | 152 | RIEPADAHVLQK                      | K | N | 1,384.78 |
| 903 | ALDOA Fructose-bisphosphate aldolase A                                                     | IPI00465439,IPI00796333 | 39,402.60 | 141 | 147 | DGADFAK                           | K | W | 731.3451 |
| 904 | YWHAE 14-3-3 protein epsilon                                                               | IPI00000816             | 29,157.00 | 142 | 153 | KEAAENSLVAYK                      | R | A | 1,338.72 |
| 905 | YWHAE 14-3-3 protein epsilon                                                               | IPI00000816             | 29,157.00 | 142 | 153 | KEAAENSLVAYK                      | R | A | 1,338.72 |
| 906 | YWHAE 14-3-3 protein epsilon                                                               | IPI00000816             | 29,157.00 | 143 | 153 | EAAENSLVAYK                       | K | A | 1,202.61 |
| 907 | YWHAE 14-3-3 protein epsilon                                                               | IPI00000816             | 29,157.00 | 143 | 153 | EAAENSLVAYK                       | K | A | 1,202.61 |
| 908 | YWHAG 14-3-3 protein gamma                                                                 | IPI00220642             | 28,285.10 | 143 | 152 | RATVVESSEK                        | K | A | 1,113.60 |
| 909 | YWHAE 14-3-3 protein epsilon                                                               | IPI00000816             | 29,157.00 | 143 | 153 | EAAENSLVAYK                       | K | A | 1,202.61 |
| 910 | YWHAE 14-3-3 protein epsilon                                                               | IPI00000816             | 29,157.00 | 143 | 153 | EAAENSLVAYK                       | K | A | 1,202.61 |
| 911 | PSAT1 cDNA FLJ56437, highly similar to Phosphoserine aminotransferase TALDO1 Transaldolase | IPI00001734             | 45,338.10 | 143 | 155 | CADYVVTGAWSAK                     | R | A | 1,435.68 |
| 912 | TALDO1 Transaldolase                                                                       | IPI00744692             | 37,523.70 | 143 | 154 | LSSTWEGIQAGK                      | K | E | 1,284.67 |
| 913 | HSP90AB1 Heat shock protein HSP 90-beta                                                    | IPI00414676             | 83,249.30 | 143 | 148 | VVVITK                            | K | H | 666.464  |
| 914 | HSP90AB1 Heat shock protein HSP 90-beta                                                    | IPI00414676             | 83,249.30 | 143 | 148 | VVVITK                            | K | H | 666.464  |
| 915 | YWHAG 14-3-3 protein gamma                                                                 | IPI00220642             | 28,285.10 | 144 | 152 | ATVVESSEK                         | R | A | 957.4978 |
| 916 | YWHAG 14-3-3 protein gamma                                                                 | IPI00220642             | 28,285.10 | 144 | 152 | ATVVESSEK                         | R | A | 957.4978 |
| 917 | YWHAG 14-3-3 protein gamma                                                                 | IPI00220642             | 28,285.10 | 144 | 152 | ATVVESSEK                         | R | A | 957.4978 |
| 918 | YWHAH 14-3-3 protein eta                                                                   | IPI00216319             | 28,201.60 | 144 | 155 | NSVVEASEAAYK                      | K | E | 1,275.63 |
| 919 | MARCKSL1 MARCKS-related protein                                                            | IPI00641181             | 19,510.60 | 145 | 157 | AAATPESQEPQAK                     | K | G | 1,335.66 |
| 920 | MARCKSL1 MARCKS-related protein                                                            | IPI00641181             | 19,510.60 | 145 | 157 | AAATPESQEPQAK                     | K | G | 1,335.66 |
| 921 | RBMX Heterogeneous nuclear ribonucleoprotein G                                             | IPI00304692             | 42,315.70 | 145 | 150 | GPLPVK                            | R | R | 618.4066 |
| 922 | RAD23B UV excision repair protein RAD23 homolog B                                          | IPI00008223,IPI00642549 | 43,153.10 | 145 | 173 | QEKPAEKPAETPVATSPTATD             | K | S | 2,961.43 |
| 923 | COPZ1 Coatomer subunit zeta-1                                                              | IPI00032851             | 20,180.90 | 146 | 168 | STSGDSSR<br>VALRGEDVPLTEQTVSQVLQS | R | E | 2,476.35 |
| 924 | RPS7 40S ribosomal protein S7                                                              | IPI00013415             | 22,109.50 | 146 | 152 | AK<br>VKLDGSR                     | R | L | 782.4611 |
| 925 | GAPDH Glyceraldehyde-3-phosphate dehydrogenase                                             | IPI00219018             | 36,035.30 | 146 | 162 | IISNASCTTNCLAPLAK                 | K | V | 1,841.93 |
| 926 | GAPDH Glyceraldehyde-3-phosphate dehydrogenase                                             | IPI00219018             | 36,035.30 | 146 | 162 | IISNASCTTNCLAPLAK                 | K | V | 1,841.93 |
| 927 | GAPDH Glyceraldehyde-3-phosphate dehydrogenase                                             | IPI00219018             | 36,035.30 | 146 | 162 | IISNASCTTNCLAPLAK                 | K | V | 1,841.93 |
| 928 | GAPDH Glyceraldehyde-3-phosphate dehydrogenase                                             | IPI00219018             | 36,035.30 | 146 | 162 | IISNASCTTNCLAPLAK                 | K | V | 1,841.93 |
| 929 | RPL14 Ribosomal protein L14 variant                                                        | IPI00555744             | 23,769.70 | 148 | 165 | GTAAAAAAAAAAAAAAAAAK              | K | V | 1,378.75 |
| 930 | HNRNPA3 Isoform 1 of Heterogeneous nuclear ribonucleoprotein A3                            | IPI00419373             | 39,577.10 | 149 | 161 | YGKIETIEVME DR                    | K | Q | 1,606.79 |
| 931 | JUP Junction plakoglobin                                                                   | IPI00554711             | 81,727.90 | 150 | 161 | LLNDEDPVVVTK                      | K | A | 1,349.74 |
| 932 | JUP Junction plakoglobin                                                                   | IPI00554711             | 81,727.90 | 150 | 161 | LLNDEDPVVVTK                      | K | A | 1,349.74 |
| 933 | PCNA Proliferating cell nuclear antigen                                                    | IPI00021700             | 28,751.30 | 150 | 164 | DLSHIGDAVVISCAK                   | R | D | 1,592.82 |
| 934 | PCNA Proliferating cell nuclear antigen                                                    | IPI00021700             | 28,751.30 | 150 | 164 | DLSHIGDAVVISCAK                   | R | D | 1,592.82 |
| 935 | PCNA Proliferating cell nuclear antigen                                                    | IPI00021700             | 28,751.30 | 150 | 164 | DLSHIGDAVVISCAK                   | R | D | 1,592.82 |
| 936 | RPLP0 60S acidic ribosomal protein P0                                                      | IPI00008530             | 34,256.30 | 150 | 162 | GTIEILSDVQLIK                     | R | T | 1,436.85 |
| 937 | RPL18A 60S ribosomal protein L18a                                                          | IPI00026202             | 20,744.60 | 150 | 157 | IKFPLPHR                          | K | V | 1,015.63 |
| 938 | RPL18A 60S ribosomal protein L18a                                                          | IPI00026202             | 20,744.60 | 150 | 157 | IKFPLPHR                          | K | V | 1,015.63 |
| 939 | HNRNPH1 Heterogeneous nuclear ribonucleoprotein H                                          | IPI00013881,IPI00479191 | 49,211.80 | 151 | 167 | STGEAFVQFASQEIAEK                 | R | A | 1,849.91 |



|     |                                                             |                                     |            |     |     |                    |   |   |          |
|-----|-------------------------------------------------------------|-------------------------------------|------------|-----|-----|--------------------|---|---|----------|
| 940 | HNRNPH1 Heterogeneous nuclear ribonucleoprotein H           | IPI00013881,IPI00479191             | 49,211.80  | 151 | 167 | STGEAFVQFASQEIAEK  | R | A | 1,849.91 |
| 941 | HNRNPH1 Heterogeneous nuclear ribonucleoprotein H           | IPI00013881,IPI00479191             | 49,211.80  | 151 | 167 | STGEAFVQFASQEIAEK  | R | A | 1,849.91 |
| 942 | HNRNPH1 Heterogeneous nuclear ribonucleoprotein H           | IPI00013881,IPI00479191             | 49,211.80  | 151 | 167 | STGEAFVQFASQEIAEK  | R | A | 1,849.91 |
| 943 | HNRNPF Heterogeneous nuclear ribonucleoprotein F            | IPI00003881                         | 45,653.80  | 151 | 167 | ITGEAFVQFASQELAEK  | K | A | 1,875.96 |
| 944 | HNRNPH1 Heterogeneous nuclear ribonucleoprotein H           | IPI00013881,IPI00479191             | 49,211.80  | 151 | 167 | STGEAFVQFASQEIAEK  | R | A | 1,849.91 |
| 945 | HNRNPF Heterogeneous nuclear ribonucleoprotein F            | IPI00003881                         | 45,653.80  | 151 | 167 | ITGEAFVQFASQELAEK  | K | A | 1,875.96 |
| 946 | HNRNPH1 Heterogeneous nuclear ribonucleoprotein H           | IPI00013881,IPI00479191             | 49,211.80  | 151 | 167 | STGEAFVQFASQEIAEK  | R | A | 1,849.91 |
| 947 | HNRNPH1 Heterogeneous nuclear ribonucleoprotein H           | IPI00013881,IPI00479191             | 49,211.80  | 151 | 167 | STGEAFVQFASQEIAEK  | R | A | 1,849.91 |
| 948 | HNRNPH1 Heterogeneous nuclear ribonucleoprotein H           | IPI00013881,IPI00479191             | 49,211.80  | 151 | 167 | STGEAFVQFASQEIAEK  | R | A | 1,849.91 |
| 949 | HNRNPH1 Heterogeneous nuclear ribonucleoprotein H           | IPI00013881,IPI00479191             | 49,211.80  | 151 | 167 | STGEAFVQFASQEIAEK  | R | A | 1,849.91 |
| 950 | HNRNPH1 Heterogeneous nuclear ribonucleoprotein H           | IPI00013881,IPI00479191             | 49,211.80  | 151 | 167 | STGEAFVQFASQEIAEK  | R | A | 1,849.91 |
| 951 | HNRNPF Heterogeneous nuclear ribonucleoprotein F            | IPI00003881                         | 45,653.80  | 151 | 167 | ITGEAFVQFASQELAEK  | K | A | 1,875.96 |
| 952 | HNRNPH1 Heterogeneous nuclear ribonucleoprotein H           | IPI00013881,IPI00479191             | 49,211.80  | 151 | 167 | STGEAFVQFASQEIAEK  | R | A | 1,849.91 |
| 953 | HMGB1 High mobility group protein B1                        | IPI00419258                         | 24,876.70  | 151 | 157 | LKEYEK             | K | D | 961.578  |
| 954 | TPI1 Isoform 1 of Triosephosphate isomerase                 | IPI00465028                         | 30,772.80  | 151 | 168 | VAHALAEGLGVIACIGEK | K | L | 1,815.99 |
| 955 | TPI1 Isoform 1 of Triosephosphate isomerase                 | IPI00465028                         | 30,772.80  | 151 | 168 | VAHALAEGLGVIACIGEK | K | L | 1,815.99 |
| 956 | TPI1 Isoform 1 of Triosephosphate isomerase                 | IPI00465028                         | 30,772.80  | 151 | 168 | VAHALAEGLGVIACIGEK | K | L | 1,815.99 |
| 957 | NAT13 Isoform 1 of N-acetyltransferase 13                   | IPI00018627                         | 19,380.90  | 153 | 169 | NLKVPSGQNADVQKTDN  | K | - | 1,843.95 |
| 958 | NAT13 Isoform 1 of N-acetyltransferase 13                   | IPI00018627                         | 19,380.90  | 153 | 169 | NLKVPSGQNADVQKTDN  | K | - | 1,843.95 |
| 959 | CFL1 Cofilin-1                                              | IPI00012011                         | 18,485.10  | 153 | 166 | LGGSAVISLEGKPL     | K | - | 1,348.79 |
| 960 | YWHAG 14-3-3 protein gamma                                  | IPI00220642                         | 28,285.10  | 153 | 162 | AYSEAHEISK         | K | E | 1,142.56 |
| 961 | YWHAG 14-3-3 protein gamma                                  | IPI00220642                         | 28,285.10  | 153 | 162 | AYSEAHEISK         | K | E | 1,142.56 |
| 962 | YWHAG 14-3-3 protein gamma                                  | IPI00220642                         | 28,285.10  | 153 | 162 | AYSEAHEISK         | K | E | 1,142.56 |
| 963 | ACTN4 Alpha-actinin-4                                       | IPI00013808                         | 104,839.20 | 153 | 166 | FAIQDISVEETSAK     | R | E | 1,545.79 |
| 964 | RUVBL1 Isoform 1 of RuvB-like 1                             | IPI00021187                         | 50,211.40  | 153 | 162 | TISHVIIGLK         | K | T | 1,088.69 |
| 965 | RUVBL1 Isoform 1 of RuvB-like 1                             | IPI00021187                         | 50,211.40  | 153 | 162 | TISHVIIGLK         | K | T | 1,088.69 |
| 966 | RUVBL1 Isoform 1 of RuvB-like 1                             | IPI00021187                         | 50,211.40  | 153 | 162 | TISHVIIGLK         | K | T | 1,088.69 |
| 967 | RUVBL1 Isoform 1 of RuvB-like 1                             | IPI00021187                         | 50,211.40  | 153 | 162 | TISHVIIGLK         | K | T | 1,088.69 |
| 968 | CDC42 Isoform 2 of Cell division control protein 42 homolog | IPI00016786,IPI00909484             | 21,240.70  | 154 | 163 | YVECSALTQK         | K | G | 1,206.59 |
| 969 | RAB18 Ras-related protein Rab-18                            | IPI00014577                         | 22,959.50  | 154 | 168 | TCDGVQCAFEELVEK    | K | I | 1,792.80 |
| 970 | RAB18 Ras-related protein Rab-18                            | IPI00014577                         | 22,959.50  | 154 | 168 | TCDGVQCAFEELVEK    | K | I | 1,792.80 |
| 971 | RAB1B Ras-related protein Rab-1B                            | IPI00008964,IPI00871366,IPI00896425 | 22,154.00  | 154 | 170 | NATNVEQAFMTMAAEIK  | K | K | 1,908.89 |
| 972 | PPIA Peptidyl-prolyl cis-trans isomerase A                  | IPI00419585,IPI00887678             | 17,994.90  | 155 | 165 | KITIADCGQLE        | K | - | 1,255.64 |
| 973 | SKP1 Isoform 1 of S-phase kinase-associated protein 1       | IPI00301364                         | 18,640.30  | 155 | 163 | KENQWCEEK          | R | - | 1,266.58 |
| 974 | PPIA Peptidyl-prolyl cis-trans isomerase A                  | IPI00419585,IPI00887678             | 17,994.90  | 155 | 165 | KITIADCGQLE        | K | - | 1,255.64 |
| 975 | PPIA Peptidyl-prolyl cis-trans isomerase A                  | IPI00419585,IPI00887678             | 17,994.90  | 155 | 165 | KITIADCGQLE        | K | - | 1,255.64 |
| 976 | HMGB1 High mobility group protein B1                        | IPI00419258                         | 24,876.70  | 155 | 163 | YEKDIAAYR          | K | A | 1,136.58 |
| 977 | ST13 Hsc70-interacting protein                              | IPI00032826                         | 41,314.40  | 155 | 160 | ASVFK              | R | L | 658.4013 |
| 978 | EEF1A1 Elongation factor 1-alpha 1                          | IPI00396485,IPI00472724             | 50,123.20  | 155 | 165 | MDSTEPPYSQK        | K | R | 1,306.57 |
| 979 | EEF1A1 Elongation factor 1-alpha 1                          | IPI00396485,IPI00472724             | 50,123.20  | 155 | 165 | MDSTEPPYSQK        | K | R | 1,306.57 |
| 980 | NAT13 Isoform 1 of N-acetyltransferase 13                   | IPI00018627                         | 19,380.90  | 156 | 169 | VPSGQNADVQKTDN     | K | - | 1,480.71 |
| 981 | NAT13 Isoform 1 of N-acetyltransferase 13                   | IPI00018627                         | 19,380.90  | 156 | 169 | VPSGQNADVQKTDN     | K | - | 1,480.71 |
| 982 | DDI2 Isoform 3 of Protein DDI1 homolog 2                    | IPI00031618,IPI00796836,IPI00845258 | 46,553.90  | 156 | 170 | NPPLAEALLSGDLEK    | R | F | 1,574.85 |
| 983 | AK1 Adenylate kinase isoenzyme 1                            | IPI00018342,IPI00640817             | 21,617.10  | 156 | 167 | ATEPVIAFYEKR       | K | G | 1,431.77 |

|      |                                                                                                  |                                                 |           |     |     |                    |   |   |          |
|------|--------------------------------------------------------------------------------------------------|-------------------------------------------------|-----------|-----|-----|--------------------|---|---|----------|
| 984  | HNRNPAB Isoform 2 of Heterogeneous nuclear ribonucleoprotein A/B                                 | IPI00334587,IPI00334713,IPI00742926             | 35,949.90 | 156 | 169 | IFVGGLNPEATEEK     | K | I | 1,511.78 |
| 985  | HNRNPAB Isoform 2 of Heterogeneous nuclear ribonucleoprotein A/B                                 | IPI00334587,IPI00334713,IPI00742926             | 35,949.90 | 156 | 169 | IFVGGLNPEATEEK     | K | I | 1,511.78 |
| 986  | AK1 Adenylate kinase isoenzyme 1                                                                 | IPI00018342,IPI00640817                         | 21,617.10 | 156 | 166 | ATEPVIAFYEK        | K | R | 1,275.67 |
| 987  | NAT13 Isoform 1 of N-acetyltransferase 13                                                        | IPI00018627                                     | 19,380.90 | 156 | 166 | VPSGQNADVQK        | K | T | 1,150.59 |
| 988  | HSD17B12 Estradiol 17-beta-dehydrogenase 12                                                      | IPI00007676                                     | 34,307.40 | 157 | 167 | MININILSVCK        | K | M | 1,312.72 |
| 989  | HSD17B12 Estradiol 17-beta-dehydrogenase 12                                                      | IPI00007676                                     | 34,307.40 | 157 | 167 | MININILSVCK        | K | M | 1,312.72 |
| 990  | (Bos taurus) similar to alpha-tubulin I isoform 1                                                | CON_00700865,IPI00387144,IPI00792677            | 50,133.70 | 157 | 164 | LSVDYGKK           | R | S | 917.5183 |
| 991  | (Bos taurus) similar to alpha-tubulin I isoform 1                                                | CON_00700865,IPI00387144,IPI00792677            | 50,133.70 | 157 | 164 | LSVDYGKK           | R | S | 925.5325 |
| 992  | (Bos taurus) similar to alpha-tubulin I isoform 1                                                | CON_00700865,IPI00387144,IPI00792677            | 50,133.70 | 157 | 164 | LSVDYGKK           | R | S | 925.5325 |
| 993  | (Bos taurus) similar to alpha-tubulin I isoform 1                                                | CON_00700865,IPI00387144,IPI00792677            | 50,133.70 | 157 | 164 | LSVDYGKK           | R | S | 925.5325 |
| 994  | (Bos taurus) similar to alpha-tubulin I isoform 1                                                | CON_00700865,IPI00387144,IPI00792677            | 50,133.70 | 157 | 164 | LSVDYGKK           | R | S | 925.5325 |
| 995  | (Bos taurus) similar to alpha-tubulin I isoform 1                                                | CON_00700865,IPI00387144,IPI00792677            | 50,133.70 | 157 | 164 | LSVDYGKK           | R | S | 925.5325 |
| 996  | YWHAZ 14-3-3 protein zeta/delta                                                                  | IPI00021263                                     | 27,727.90 | 158 | 167 | KEMQPTHPIR         | K | L | 1,260.66 |
| 997  | YWHAQ 14-3-3 protein theta                                                                       | IPI00018146                                     | 27,747.40 | 158 | 167 | KEMQPTHPIR         | K | L | 1,260.66 |
| 998  | RPS8 40S ribosomal protein S8                                                                    | IPI00216587,IPI00645201,IPI00872430             | 24,188.40 | 158 | 170 | ISSLLEEQFQQGK      | K | L | 1,514.79 |
| 999  | ACOT7 Isoform 1 of Cytosolic acyl coenzyme A thioester hydrolase                                 | IPI00010415,IPI00219451,IPI00219452,IPI00395748 | 41,777.00 | 158 | 168 | ATLWYVPLSLK        | K | N | 1,298.76 |
| 1000 | DHFR Dihydrofolate reductase                                                                     | IPI00030357,IPI00887771                         | 21,435.30 | 159 | 174 | LLPEYPGVLSDVQEEK   | K | G | 1,823.95 |
| 1001 | DHFR Dihydrofolate reductase                                                                     | IPI00030357,IPI00887771                         | 21,435.30 | 159 | 174 | LLPEYPGVLSDVQEEK   | K | G | 1,823.95 |
| 1002 | DHFR Dihydrofolate reductase                                                                     | IPI00030357,IPI00887771                         | 21,435.30 | 159 | 174 | LLPEYPGVLSDVQEEK   | K | G | 1,823.95 |
| 1003 | PRDX1 Peroxiredoxin-1                                                                            | IPI00000874,IPI00640741                         | 22,092.90 | 159 | 168 | LVQAFQFTDK         | R | H | 1,204.65 |
| 1004 | PLS3 plastin 3                                                                                   | IPI00216694                                     | 70,795.90 | 159 | 168 | AVGDGIVLCK         | K | M | 1,039.57 |
| 1005 | PLS3 plastin 3                                                                                   | IPI00216694                                     | 70,795.90 | 159 | 168 | AVGDGIVLCK         | K | M | 1,039.57 |
| 1006 | PLS3 plastin 3                                                                                   | IPI00216694                                     | 70,795.90 | 159 | 168 | AVGDGIVLCK         | K | M | 1,039.57 |
| 1007 | PLS3 plastin 3                                                                                   | IPI00216694                                     | 70,795.90 | 159 | 168 | AVGDGIVLCK         | K | M | 1,039.57 |
| 1008 | PLS3 plastin 3                                                                                   | IPI00216694                                     | 70,795.90 | 159 | 168 | AVGDGIVLCK         | K | M | 1,039.57 |
| 1009 | NUDC Nuclear migration protein nudC                                                              | IPI00550746                                     | 38,225.70 | 159 | 173 | LKPNLNGADLPNYR     | K | W | 1,649.89 |
| 1010 | NUDC Nuclear migration protein nudC                                                              | IPI00550746                                     | 38,225.70 | 159 | 173 | LKPNLNGADLPNYR     | K | W | 1,649.89 |
| 1011 | YWHAB Isoform Long of 14-3-3 protein beta/alpha                                                  | IPI00216318,IPI00759832                         | 28,065.10 | 160 | 169 | KEMQPTHPIR         | K | L | 1,260.66 |
| 1012 | KHDRBS1 Isoform 1 of KH domain-containing, RNA binding, signal transduction-associated protein 1 | IPI00008575,IPI00385834,IPI00479209             | 48,210.20 | 160 | 165 | VLIPVK             | R | Q | 676.4848 |
| 1013 | GNB2L1 38 kDa protein                                                                            | IPI00641950,IPI00848226                         | 37,740.10 | 160 | 168 | LWNTLGVCK          | K | Y | 1,098.59 |
| 1014 | GNB2L1 38 kDa protein                                                                            | IPI00641950,IPI00848226                         | 37,740.10 | 160 | 168 | LWNTLGVCK          | K | Y | 1,098.59 |
| 1015 | GNB2L1 38 kDa protein                                                                            | IPI00641950,IPI00848226                         | 37,740.10 | 160 | 168 | LWNTLGVCK          | K | Y | 1,098.59 |
| 1016 | ST13 Hsc70-interacting protein                                                                   | IPI00032826                                     | 41,314.40 | 161 | 169 | LQKPNAAIR          | K | D | 1,018.62 |
| 1017 | ST13 Hsc70-interacting protein                                                                   | IPI00032826                                     | 41,314.40 | 161 | 169 | LQKPNAAIR          | K | D | 1,018.62 |
| 1018 | PCBP2 Poly(rC)-binding protein 2                                                                 | IPI00216689,IPI00796337                         | 38,562.90 | 161 | 176 | QICVVMLETLSQSPPK   | K | G | 1,837.96 |
| 1019 | HNRNPA2B1 43 kDa protein                                                                         | IPI00874030                                     | 43,234.30 | 161 | 173 | EESGKPGAHVTVK      | R | K | 1,354.73 |
| 1020 | GDI2 cDNA FLJ60299, highly similar to Rab GDP dissociation inhibitor beta                        | IPI00031461                                     | 51,138.50 | 161 | 168 | TFEGIDPK           | R | K | 914.4711 |
| 1021 | HNRNPA2B1 43 kDa protein                                                                         | IPI00874030                                     | 43,234.30 | 161 | 173 | EESGKPGAHVTVK      | R | K | 1,354.73 |
| 1022 | PSMB2 Proteasome subunit beta type-2                                                             | IPI00028006                                     | 22,819.50 | 162 | 170 | CLEELQKR           | R | F | 1,219.68 |
| 1023 | PEBP1 Phosphatidylethanolamine-binding protein 1                                                 | IPI00219446                                     | 21,038.90 | 162 | 179 | APVAGTCYQAEWDDYVPK | R | L | 2,077.94 |
| 1024 | PEBP1 Phosphatidylethanolamine-binding protein 1                                                 | IPI00219446                                     | 21,038.90 | 162 | 179 | APVAGTCYQAEWDDYVPK | R | L | 2,077.94 |
| 1025 | PSMB2 Proteasome subunit beta type-2                                                             | IPI00028006                                     | 22,819.50 | 163 | 170 | CLEELQKR           | K | F | 1,083.57 |
| 1026 | PSAT1 cDNA FLJ56437, highly similar to Phosphoserine aminotransferase                            | IPI00001734                                     | 45,338.10 | 163 | 172 | FGTINIVHPK         | K | L | 1,133.66 |
| 1027 | TUBB Tubulin beta chain                                                                          | IPI00011654                                     | 49,652.60 | 163 | 174 | IMNTFSVVPSPK       | R | V | 1,327.72 |
| 1028 | TUBB Tubulin beta chain                                                                          | IPI00011654                                     | 49,652.60 | 163 | 174 | IMNTFSVVPSPK       | R | V | 1,343.71 |
| 1029 | TUBB Tubulin beta chain                                                                          | IPI00011654                                     | 49,652.60 | 163 | 174 | IMNTFSVVPSPK       | R | V | 1,343.71 |
| 1030 | TUBB Tubulin beta chain                                                                          | IPI00011654                                     | 49,652.60 | 163 | 174 | IMNTFSVVPSPK       | R | V | 1,327.72 |

|      |                                                                                       |                                     |           |     |     |                      |   |   |          |
|------|---------------------------------------------------------------------------------------|-------------------------------------|-----------|-----|-----|----------------------|---|---|----------|
| 1031 | TUBB Tubulin beta chain                                                               | IPI00011654                         | 49,652.60 | 163 | 174 | IMNTFSVVPSPK         | R | V | 1,343.71 |
| 1032 | TUBB2C Tubulin beta-2C chain                                                          | IPI00007752                         | 49,812.70 | 163 | 174 | IMNTFSVVPSPK         | R | V | 1,343.71 |
| 1033 | TUBB Tubulin beta chain                                                               | IPI00011654                         | 49,652.60 | 163 | 174 | IMNTFSVVPSPK         | R | V | 1,343.71 |
| 1034 | TUBB Tubulin beta chain                                                               | IPI00011654                         | 49,652.60 | 163 | 174 | IMNTFSVVPSPK         | R | V | 1,327.72 |
| 1035 | TUBB Tubulin beta chain                                                               | IPI00011654                         | 49,652.60 | 163 | 174 | IMNTFSVVPSPK         | R | V | 1,327.72 |
| 1036 | TUBB2C Tubulin beta-2C chain                                                          | IPI00007752                         | 49,812.70 | 163 | 174 | IMNTFSVVPSPK         | R | V | 1,343.71 |
| 1037 | TUBB Tubulin beta chain                                                               | IPI00011654                         | 49,652.60 | 163 | 174 | IMNTFSVVPSPK         | R | V | 1,343.71 |
| 1038 | TUBB Tubulin beta chain                                                               | IPI00011654                         | 49,652.60 | 163 | 174 | IMNTFSVVPSPK         | R | V | 1,327.72 |
| 1039 | TUBB Tubulin beta chain                                                               | IPI00011654                         | 49,652.60 | 163 | 174 | IMNTFSVVPSPK         | R | V | 1,327.72 |
| 1040 | TUBB2C Tubulin beta-2C chain                                                          | IPI00007752                         | 49,812.70 | 163 | 174 | IMNTFSVVPSPK         | R | V | 1,327.72 |
| 1041 | EEF1B2 Elongation factor 1-beta                                                       | IPI00178440                         | 24,746.20 | 164 | 176 | SIQADGLVWGSSK        | R | L | 1,355.70 |
| 1042 | EEF1B2 Elongation factor 1-beta                                                       | IPI00178440                         | 24,746.20 | 164 | 176 | SIQADGLVWGSSK        | R | L | 1,355.70 |
| 1043 | EEF1B2 Elongation factor 1-beta                                                       | IPI00178440                         | 24,746.20 | 164 | 176 | SIQADGLVWGSSK        | R | L | 1,355.70 |
| 1044 | EEF1B2 Elongation factor 1-beta                                                       | IPI00178440                         | 24,746.20 | 164 | 176 | SIQADGLVWGSSK        | R | L | 1,355.70 |
| 1045 | REEP5 Receptor expression-enhancing protein 5                                         | IPI00024670,IPI00744902             | 21,476.50 | 165 | 172 | ETADAITK             | K | E | 856.4503 |
| 1046 | MDH1 Malate dehydrogenase, cytoplasmic                                                | IPI00291005,IPI00915869             | 36,408.90 | 165 | 170 | AQIALK               | K | L | 651.428  |
| 1047 | BTF3 Isoform 1 of Transcription factor BTF3                                           | IPI00221035                         | 22,150.30 | 165 | 171 | LAEALPK              | R | Q | 749.4648 |
| 1048 | BTF3 Isoform 1 of Transcription factor BTF3                                           | IPI00221035                         | 22,150.30 | 165 | 171 | LAEALPK              | R | Q | 749.4648 |
| 1049 | BTF3 Isoform 1 of Transcription factor BTF3                                           | IPI00221035                         | 22,150.30 | 165 | 171 | LAEALPK              | R | Q | 749.4648 |
| 1050 | EEF1A2 Elongation factor 1-alpha 2                                                    | IPI00014424                         | 50,452.60 | 166 | 172 | RYDEIVK              | K | E | 930.5135 |
| 1051 | CHCHD3 Coiled-coil-helix-coiled-coil-helix domain-containing protein 3, mitochondrial | IPI00015833                         | 26,134.50 | 166 | 173 | AAEEVEAK             | K | F | 854.4345 |
| 1052 | EEF1A1 Elongation factor 1-alpha 1                                                    | IPI00396485,IPI00472724             | 50,123.20 | 167 | 179 | YEEIVKEVSTYIK        | R | K | 1,616.88 |
| 1053 | CCT3 chaperonin containing TCP1, subunit 3 isoform b                                  | IPI00290770,IPI00552715,IPI00553185 | 60,446.30 | 167 | 180 | WSSLACNIALDAVK       | R | M | 1,555.80 |
| 1054 | CCT3 chaperonin containing TCP1, subunit 3 isoform b                                  | IPI00290770,IPI00552715,IPI00553185 | 60,446.30 | 167 | 180 | WSSLACNIALDAVK       | R | M | 1,555.80 |
| 1055 | NAPA Alpha-soluble NSF attachment protein                                             | IPI00009253                         | 33,216.10 | 168 | 180 | VAGYAALLEQYQK        | K | A | 1,461.78 |
| 1056 | NAPA Alpha-soluble NSF attachment protein                                             | IPI00009253                         | 33,216.10 | 168 | 180 | VAGYAALLEQYQK        | K | A | 1,461.78 |
| 1057 | NAPA Alpha-soluble NSF attachment protein                                             | IPI00009253                         | 33,216.10 | 168 | 180 | VAGYAALLEQYQK        | K | A | 1,461.78 |
| 1058 | RPS5 40S ribosomal protein S5                                                         | IPI00008433                         | 22,859.00 | 168 | 182 | TIAECLADELINAAK      | K | G | 1,639.85 |
| 1059 | RPS5 40S ribosomal protein S5                                                         | IPI00008433                         | 22,859.00 | 168 | 182 | TIAECLADELINAAK      | K | G | 1,639.85 |
| 1060 | RNASEH2A Ribonuclease H2 subunit A                                                    | IPI00290192                         | 33,377.00 | 168 | 183 | ADALYPVVSAASICAK     | K | V | 1,643.86 |
| 1061 | RAB18 Ras-related protein Rab-18                                                      | IPI00014577                         | 22,959.50 | 169 | 183 | IIQTPGLWESENQNK      | K | G | 1,764.90 |
| 1062 | RAB18 Ras-related protein Rab-18                                                      | IPI00014577                         | 22,959.50 | 169 | 183 | IIQTPGLWESENQNK      | K | G | 1,764.90 |
| 1063 | HSP90AA1 heat shock protein 90kDa alpha (cytosolic), class A member 1 isoform 1       | IPI00382470,IPI00784295             | 98,147.10 | 169 | 180 | ELISNSSDALDK         | R | I | 1,299.65 |
| 1064 | HSP90AA1 heat shock protein 90kDa alpha (cytosolic), class A member 1 isoform 1       | IPI00382470,IPI00784295             | 98,147.10 | 169 | 180 | ELISNSSDALDK         | R | I | 1,299.65 |
| 1065 | PCNA Proliferating cell nuclear antigen                                               | IPI00021700                         | 28,751.30 | 169 | 181 | FSASGELGNGNIK        | K | L | 1,301.66 |
| 1066 | PCNA Proliferating cell nuclear antigen                                               | IPI00021700                         | 28,751.30 | 169 | 181 | FSASGELGNGNIK        | K | L | 1,301.66 |
| 1067 | PCNA Proliferating cell nuclear antigen                                               | IPI00021700                         | 28,751.30 | 169 | 181 | FSASGELGNGNIK        | K | L | 1,301.66 |
| 1068 | PSMA5 Proteasome subunit alpha type-5                                                 | IPI00291922                         | 26,393.30 | 169 | 187 | AIGSASEGAQSSLQEVYHK  | R | S | 1,969.97 |
| 1069 | TPI1 Isoform 1 of Triosephosphate isomerase                                           | IPI00465028                         | 30,772.80 | 169 | 179 | LDEREAGITEK          | K | V | 1,268.66 |
| 1070 | TPI1 Isoform 1 of Triosephosphate isomerase                                           | IPI00465028                         | 30,772.80 | 169 | 179 | LDEREAGITEK          | K | V | 1,268.66 |
| 1071 | RPL11 Isoform 1 of 60S ribosomal protein L11                                          | IPI00376798                         | 20,235.20 | 170 | 178 | YDGIIIPGK            | K | - | 983.5654 |
| 1072 | UBE2S Ubiquitin-conjugating enzyme E2 S                                               | IPI00217949                         | 23,828.40 | 170 | 197 | ALASGTEASSTDPGAPGGPG | R | K | 2,465.13 |
| 1073 | UBE2S Ubiquitin-conjugating enzyme E2 S                                               | IPI00217949                         | 23,828.40 | 170 | 197 | ALASGTEASSTDPGAPGGPG | R | K | 2,465.13 |
| 1074 | DNAJB1 DnaJ homolog subfamily B member 1                                              | IPI00015947                         | 38,027.60 | 170 | 181 | GAEGPMAK             | R | K | 1,393.68 |
| 1075 | C16orf80 UPF0468 protein C16orf80                                                     | IPI00001655                         | 22,757.60 | 171 | 182 | VSLEEIYSGCTK         | R | L | 1,448.70 |
| 1076 | MDH1 Malate dehydrogenase, cytoplasmic                                                | IPI00291005,IPI00915869             | 36,408.90 | 171 | 179 | LGVTANDVK            | K | N | 924.5241 |
| 1077 | HNRPDL Isoform 1 of Heterogeneous nuclear ribonucleoprotein D-like                    | IPI00011274                         | 46,420.60 | 171 | 180 | FGEVVDCTIK           | R | T | 1,175.59 |
| 1078 | RUVBL1 Isoform 1 of RuvB-like 1                                                       | IPI00021187                         | 50,211.40 | 172 | 182 | LDPSIFESLQK          | K | E | 1,284.69 |

|      |                                                                                 |                                     |           |     |     |                             |   |   |          |
|------|---------------------------------------------------------------------------------|-------------------------------------|-----------|-----|-----|-----------------------------|---|---|----------|
| 1079 | HSPA8 Isoform 1 of Heat shock cognate 71 kDa protein                            | IPI00003865                         | 70,881.80 | 172 | 187 | IINEPTAAAIAYGLDK            | R | K | 1,667.91 |
| 1080 | HSPA8 Isoform 1 of Heat shock cognate 71 kDa protein                            | IPI00003865                         | 70,881.80 | 172 | 187 | IINEPTAAAIAYGLDK            | R | K | 1,667.91 |
| 1081 | HSPA8 Isoform 1 of Heat shock cognate 71 kDa protein                            | IPI00003865                         | 70,881.80 | 172 | 187 | IINEPTAAAIAYGLDK            | R | K | 1,667.91 |
| 1082 | HSPA8 Isoform 1 of Heat shock cognate 71 kDa protein                            | IPI00003865                         | 70,881.80 | 172 | 187 | IINEPTAAAIAYGLDK            | R | K | 1,667.91 |
| 1083 | RAB1B Ras-related protein Rab-1B                                                | IPI00008964,IPI00871366,IPI00896425 | 22,154.00 | 173 | 187 | MGPGAASGGGERPNLK            | R | I | 1,465.73 |
| 1084 | CMPK1 cytidine monophosphate (UMP-CMP) kinase 1, cytosolic isoform a            | IPI00219953,IPI00909419             | 25,837.80 | 173 | 183 | SDDNRESLEKR                 | R | I | 1,356.66 |
| 1085 | CMPK1 cytidine monophosphate (UMP-CMP) kinase 1, cytosolic isoform a            | IPI00219953,IPI00909419             | 25,837.80 | 173 | 183 | SDDNRESLEKR                 | R | I | 1,356.66 |
| 1086 | EEF1A1 Elongation factor 1-alpha 1                                              | IPI00396485,IPI00472724             | 50,123.20 | 173 | 180 | EVSTYIKK                    | K | I | 975.5601 |
| 1087 | HNRNPA0 Heterogeneous nuclear ribonucleoprotein A0                              | IPI00011913                         | 30,822.50 | 173 | 189 | AVPKEDIYSGGGGGGSR           | K | S | 1,614.80 |
| 1088 | HNRNPA0 Heterogeneous nuclear ribonucleoprotein A0                              | IPI00011913                         | 30,822.50 | 173 | 189 | AVPKEDIYSGGGGGGSR           | K | S | 1,614.80 |
| 1089 | HNRNPA0 Heterogeneous nuclear ribonucleoprotein A0                              | IPI00011913                         | 30,822.50 | 173 | 189 | AVPKEDIYSGGGGGGSR           | K | S | 1,614.80 |
| 1090 | TPI1 Isoform 1 of Triosephosphate isomerase                                     | IPI00465028                         | 30,772.80 | 173 | 179 | EAGITEK                     | R | V | 755.4026 |
| 1091 | TPI1 Isoform 1 of Triosephosphate isomerase                                     | IPI00465028                         | 30,772.80 | 173 | 179 | EAGITEK                     | R | V | 755.4026 |
| 1092 | ST13 Hsc70-interacting protein                                                  | IPI00032826                         | 41,314.40 | 174 | 186 | AIEINPDSAQPYK               | R | W | 1,453.74 |
| 1093 | HNRNPA2B1 43 kDa protein                                                        | IPI00874030                         | 43,234.30 | 175 | 181 | LFVGGIK                     | K | E | 741.475  |
| 1094 | RPL9 60S ribosomal protein L9                                                   | IPI00031691,IPI00795717             | 21,845.70 | 175 | 184 | FLDGIYVSEK                  | K | G | 1,178.62 |
| 1095 | PSMA7 Isoform 1 of Proteasome subunit alpha type-7                              | IPI00024175                         | 27,869.10 | 175 | 189 | NYTDEAIETDDLTIK             | K | L | 1,748.83 |
| 1096 | PSMA7 Isoform 1 of Proteasome subunit alpha type-7                              | IPI00024175                         | 27,869.10 | 175 | 189 | NYTDEAIETDDLTIK             | K | L | 1,748.83 |
| 1097 | PSMA7 Isoform 1 of Proteasome subunit alpha type-7                              | IPI00024175                         | 27,869.10 | 175 | 189 | NYTDEAIETDDLTIK             | K | L | 1,748.83 |
| 1098 | PSMA7 Isoform 1 of Proteasome subunit alpha type-7                              | IPI00024175                         | 27,869.10 | 175 | 189 | NYTDEAIETDDLTIK             | K | L | 1,748.83 |
| 1099 | NAMPT Isoform 1 of Nicotinamide phosphoribosyltransferase                       | IPI00018873,IPI00337370,IPI00472879 | 55,504.50 | 175 | 189 | YLLETSGNLDGLEYK             | K | L | 1,722.87 |
| 1100 | RAB1A Isoform 1 of Ras-related protein Rab-1A                                   | IPI00005719,IPI00873902             | 22,660.40 | 176 | 187 | MGPATAGGAEK                 | R | S | 1,070.50 |
| 1101 | EIF3 Eukaryotic translation initiation factor 3 subunit I                       | IPI00012795                         | 36,484.00 | 177 | 185 | SGEVLNVK                    | K | E | 952.5553 |
| 1102 | PCBP2 Poly(rC)-binding protein 2                                                | IPI00216689,IPI00796337             | 38,562.90 | 177 | 199 | GVTIPYRPKPSSSPVIFAGGQ<br>DR | K | Y | 2,437.31 |
| 1103 | MGMT O-6-methylguanine-DNA methyltransferase                                    | IPI00028618                         | 25,031.90 | 179 | 196 | VVCSSGAVGNYSGLAVK           | R | E | 1,732.88 |
| 1104 | IGF2BP1 Insulin-like growth factor 2 mRNA-binding protein 1                     | IPI00008557                         | 63,438.30 | 179 | 190 | QGSPPVAAGAPAK               | R | Q | 1,061.58 |
| 1105 | HSP90AB1 Heat shock protein HSP 90-beta                                         | IPI00414676                         | 83,249.30 | 181 | 196 | VILHLKEDQTEYLEER            | K | R | 2,023.06 |
| 1106 | HSP90AB1 Heat shock protein HSP 90-beta                                         | IPI00414676                         | 83,249.30 | 181 | 196 | VILHLKEDQTEYLEER            | K | R | 2,023.06 |
| 1107 | PSMB2 Proteasome subunit beta type-2                                            | IPI00028006                         | 22,819.50 | 182 | 198 | IIDKNGIHDLDNISFPK           | R | Q | 1,955.06 |
| 1108 | HSP90AA1 heat shock protein 90kDa alpha (cytosolic), class A member 1 isoform 1 | IPI00382470,IPI00784295             | 98,147.10 | 183 | 196 | YESLTDPSKLDGSK              | R | E | 1,555.78 |
| 1109 | ENO1 Isoform alpha-enolase of Alpha-enolase                                     | IPI00465248                         | 47,152.20 | 184 | 193 | IGAEVYHNLK                  | R | N | 1,151.63 |
| 1110 | GNB2L1 38 kDa protein                                                           | IPI00641950,IPI00848226             | 37,740.10 | 185 | 201 | FSPNSSNPIIVSCGWDK           | R | L | 1,915.91 |
| 1111 | GNB2L1 38 kDa protein                                                           | IPI00641950,IPI00848226             | 37,740.10 | 185 | 201 | FSPNSSNPIIVSCGWDK           | R | L | 1,915.91 |
| 1112 | TPI1 Isoform 1 of Triosephosphate isomerase                                     | IPI00465028                         | 30,772.80 | 187 | 197 | VIADNVKDWSK                 | K | V | 1,290.70 |
| 1113 | TPI1 Isoform 1 of Triosephosphate isomerase                                     | IPI00465028                         | 30,772.80 | 187 | 197 | VIADNVKDWSK                 | K | V | 1,290.70 |
| 1114 | TPI1 Isoform 1 of Triosephosphate isomerase                                     | IPI00465028                         | 30,772.80 | 187 | 197 | VIADNVKDWSK                 | K | V | 1,290.70 |
| 1115 | TPI1 Isoform 1 of Triosephosphate isomerase                                     | IPI00465028                         | 30,772.80 | 187 | 197 | VIADNVKDWSK                 | K | V | 1,290.70 |
| 1116 | YWHAZ 14-3-3 protein zeta/delta                                                 | IPI00021263                         | 27,727.90 | 188 | 193 | ACSLAK                      | K | T | 657.348  |
| 1117 | YWHAZ 14-3-3 protein zeta/delta                                                 | IPI00021263                         | 27,727.90 | 188 | 193 | ACSLAK                      | K | T | 657.348  |
| 1118 | YWHAZ 14-3-3 protein zeta/delta                                                 | IPI00021263                         | 27,727.90 | 188 | 193 | ACSLAK                      | K | T | 657.348  |
| 1119 | SLC25A5 ADP/ATP translocase 2                                                   | IPI00007188                         | 32,878.50 | 189 | 199 | AAYFGIYDTAK                 | R | G | 1,227.61 |
| 1120 | SLC25A5 ADP/ATP translocase 2                                                   | IPI00007188                         | 32,878.50 | 189 | 199 | AAYFGIYDTAK                 | R | G | 1,227.61 |

|      |                                                                       |                                     |           |     |     |                      |   |   |          |
|------|-----------------------------------------------------------------------|-------------------------------------|-----------|-----|-----|----------------------|---|---|----------|
| 1121 | HNRPD L Isoform 1 of Heterogeneous nuclear ribonucleoprotein D-like   | IPI00011274                         | 46,420.60 | 190 | 197 | GFGFVLFK             | R | D | 922.5277 |
| 1122 | HNRPD L Isoform 1 of Heterogeneous nuclear ribonucleoprotein D-like   | IPI00011274                         | 46,420.60 | 190 | 197 | GFGFVLFK             | R | D | 922.5277 |
| 1123 | YWHAB Isoform Long of 14-3-3 protein beta/alpha                       | IPI00216318,IPI00759832             | 28,065.10 | 190 | 195 | ACSLAK               | K | T | 657.348  |
| 1124 | YWHAB Isoform Long of 14-3-3 protein beta/alpha                       | IPI00216318,IPI00759832             | 28,065.10 | 190 | 195 | ACSLAK               | K | T | 657.348  |
| 1125 | YWHAB Isoform Long of 14-3-3 protein beta/alpha                       | IPI00216318,IPI00759832             | 28,065.10 | 190 | 195 | ACSLAK               | K | T | 657.348  |
| 1126 | NONO Non-POU domain-containing octamer-binding protein                | IPI00304596                         | 54,213.60 | 191 | 202 | GIVEFSGKPAAR         | K | K | 1,239.69 |
| 1127 | NONO Non-POU domain-containing octamer-binding protein                | IPI00304596                         | 54,213.60 | 191 | 202 | GIVEFSGKPAAR         | K | K | 1,239.69 |
| 1128 | NONO Non-POU domain-containing octamer-binding protein                | IPI00304596                         | 54,213.60 | 191 | 202 | GIVEFSGKPAAR         | K | K | 1,239.69 |
| 1129 | KPNB1 Importin subunit beta-1                                         | IPI00001639                         | 97,153.30 | 192 | 206 | LAATNALLNSLEFTK      | K | A | 1,613.90 |
| 1130 | KPNB1 Importin subunit beta-1                                         | IPI00001639                         | 97,153.30 | 192 | 206 | LAATNALLNSLEFTK      | K | A | 1,613.90 |
| 1131 | KPNB1 Importin subunit beta-1                                         | IPI00001639                         | 97,153.30 | 192 | 206 | LAATNALLNSLEFTK      | K | A | 1,613.90 |
| 1132 | KPNB1 Importin subunit beta-1                                         | IPI00001639                         | 97,153.30 | 192 | 206 | LAATNALLNSLEFTK      | K | A | 1,613.90 |
| 1133 | KPNB1 Importin subunit beta-1                                         | IPI00001639                         | 97,153.30 | 192 | 206 | LAATNALLNSLEFTK      | K | A | 1,613.90 |
| 1134 | KPNB1 Importin subunit beta-1                                         | IPI00001639                         | 97,153.30 | 192 | 206 | LAATNALLNSLEFTK      | K | A | 1,613.90 |
| 1135 | DDI2 Isoform 3 of Protein DDI1 homolog 2                              | IPI00031618,IPI00796836,IPI00845258 | 46,553.90 | 192 | 205 | LFSADPFDLAQAK        | R | I | 1,559.78 |
| 1136 | TIAL1 Nucleolysin TIAR                                                | IPI00005615,IPI00644708,IPI00647436 | 41,571.90 | 193 | 203 | FEDVNVQSSPK          | R | N | 1,257.62 |
| 1137 | RCC1 regulator of chromosome condensation 1 isoform a                 | IPI00001661,IPI00747309,IPI00787306 | 48,126.30 | 193 | 207 | SMVPVQVQLDVPVVK      | K | V | 1,661.94 |
| 1138 | PSMA7 Isoform 1 of Proteasome subunit alpha type-7                    | IPI00024175                         | 27,869.10 | 194 | 204 | ALLEVVQSGGK          | K | N | 1,108.65 |
| 1139 | PSMA7 Isoform 1 of Proteasome subunit alpha type-7                    | IPI00024175                         | 27,869.10 | 194 | 204 | ALLEVVQSGGK          | K | N | 1,108.65 |
| 1140 | PSMA7 Isoform 1 of Proteasome subunit alpha type-7                    | IPI00024175                         | 27,869.10 | 194 | 204 | ALLEVVQSGGK          | K | N | 1,108.65 |
| 1141 | PSMA1 Isoform Short of Proteasome subunit alpha type-1                | IPI00016832,IPI00472442             | 29,538.00 | 194 | 208 | ALRETLPAEQDLTTK      | R | N | 1,693.92 |
| 1142 | CDC123 Cell division cycle protein 123 homolog                        | IPI00005670,IPI00514175             | 39,118.10 | 194 | 204 | DYTQYYDHISK          | R | Q | 1,440.65 |
| 1143 | NAMPT Isoform 1 of Nicotinamide phosphoribosyltransferase             | IPI00018873,IPI00337370,IPI00472879 | 55,504.50 | 197 | 216 | GVSSQETAGIGASAHLVNFK | R | G | 1,981.02 |
| 1144 | PSMA5 Proteasome subunit alpha type-5                                 | IPI00291922                         | 26,393.30 | 197 | 203 | SSLILK               | K | Q | 781.5274 |
| 1145 | CACYBP Isoform 1 of Calcyclin-binding protein                         | IPI00395627,IPI00552308             | 26,192.30 | 197 | 208 | KIYEDGDDMKR          | K | T | 1,516.69 |
| 1146 | DDX5 Probable ATP-dependent RNA helicase DDX5                         | IPI00017617                         | 69,131.70 | 198 | 207 | STCIYGGAPK           | K | G | 1,061.52 |
| 1147 | DDX5 Probable ATP-dependent RNA helicase DDX5                         | IPI00017617                         | 69,131.70 | 198 | 207 | STCIYGGAPK           | K | G | 1,061.52 |
| 1148 | DDX5 Probable ATP-dependent RNA helicase DDX5                         | IPI00017617                         | 69,131.70 | 198 | 207 | STCIYGGAPK           | K | G | 1,061.52 |
| 1149 | GNB2 Guanine nucleotide-binding protein G(I)/G(S)/G(T) subunit beta-2 | IPI00003348                         | 37,313.80 | 198 | 209 | TFVSGACDASIK         | R | L | 1,263.61 |
| 1150 | TP11 Isoform 1 of Triosephosphate isomerase                           | IPI00465028                         | 30,772.80 | 198 | 212 | VVLAYEPVWAIGTGK      | K | T | 1,610.90 |
| 1151 | TP11 Isoform 1 of Triosephosphate isomerase                           | IPI00465028                         | 30,772.80 | 198 | 212 | VVLAYEPVWAIGTGK      | K | T | 1,610.90 |
| 1152 | TP11 Isoform 1 of Triosephosphate isomerase                           | IPI00465028                         | 30,772.80 | 198 | 212 | VVLAYEPVWAIGTGK      | K | T | 1,610.90 |
| 1153 | TP11 Isoform 1 of Triosephosphate isomerase                           | IPI00465028                         | 30,772.80 | 198 | 212 | VVLAYEPVWAIGTGK      | K | T | 1,610.90 |
| 1154 | TP11 Isoform 1 of Triosephosphate isomerase                           | IPI00465028                         | 30,772.80 | 198 | 212 | VVLAYEPVWAIGTGK      | K | T | 1,610.90 |
| 1155 | TP11 Isoform 1 of Triosephosphate isomerase                           | IPI00465028                         | 30,772.80 | 198 | 212 | VVLAYEPVWAIGTGK      | K | T | 1,610.90 |
| 1156 | RPL13 60S ribosomal protein L13                                       | IPI00465361                         | 24,244.20 | 199 | 209 | AKEAAEQDVEK          | R | K | 1,233.63 |
| 1157 | RNASEH2A Ribonuclease H2 subunit A                                    | IPI00290192                         | 33,377.00 | 199 | 215 | LQDLDTDYGSGYPNDPK    | K | T | 1,905.86 |
| 1158 | IGF2BP1 Insulin-like growth factor 2 mRNA-binding protein 1           | IPI00008557                         | 63,438.30 | 200 | 213 | LLVPTQYVGAIGK        | R | E | 1,479.90 |
| 1159 | IGF2BP1 Insulin-like growth factor 2 mRNA-binding protein 1           | IPI00008557                         | 63,438.30 | 200 | 213 | LLVPTQYVGAIGK        | R | E | 1,479.90 |
| 1160 | SFPQ Isoform Long of Splicing factor, proline- and glutamine-rich     | IPI00010740                         | 76,131.50 | 200 | 208 | QGPGGGPK             | K | G | 802.43   |
| 1161 | CCT3 chaperonin containing TCP1, subunit 3 isoform b                  | IPI00290770,IPI00552715,IPI00553185 | 60,446.30 | 200 | 215 | VEKIPGGIIEDSCVLR     | R | G | 1,792.97 |

|      |                                                                                           |                                                             |            |     |     |                      |   |   |          |
|------|-------------------------------------------------------------------------------------------|-------------------------------------------------------------|------------|-----|-----|----------------------|---|---|----------|
| 1162 | SFPQ Isoform Long of Splicing factor, proline- and glutamine-rich                         | IPI00010740                                                 | 76,131.50  | 200 | 208 | QGPGPGGPK            | K | G | 802.43   |
| 1163 | CCT7 T-complex protein 1 subunit eta                                                      | IPI00018465                                                 | 59,349.80  | 200 | 217 | VQGGALEDSQLVAGVAFK   | K | K | 1,796.96 |
| 1164 | CCT7 T-complex protein 1 subunit eta                                                      | IPI00018465                                                 | 59,349.80  | 200 | 217 | VQGGALEDSQLVAGVAFK   | K | K | 1,796.96 |
| 1165 | RPL13 60S ribosomal protein L13                                                           | IPI00465361                                                 | 24,244.20  | 201 | 209 | EAAEQDVEK            | K | K | 1,026.48 |
| 1166 | RPL13 60S ribosomal protein L13                                                           | IPI00465361                                                 | 24,244.20  | 201 | 209 | EAAEQDVEK            | K | K | 1,026.48 |
| 1167 | RPL13 60S ribosomal protein L13                                                           | IPI00465361                                                 | 24,244.20  | 201 | 209 | EAAEQDVEK            | K | K | 1,026.48 |
| 1168 | ENO1 Isoform alpha-enolase of Alpha-enolase                                               | IPI00465248                                                 | 47,152.20  | 203 | 221 | DATNVGDEGGFAPNILENK  | K | E | 1,968.94 |
| 1169 | ENO1 Isoform alpha-enolase of Alpha-enolase                                               | IPI00465248                                                 | 47,152.20  | 203 | 221 | DATNVGDEGGFAPNILENK  | K | E | 1,968.94 |
| 1170 | BUB3 Mitotic checkpoint protein BUB3                                                      | IPI00013468,IPI00514701,IPI00644108                         | 37,136.70  | 203 | 216 | VAVEYLDPSPEVQK       | R | K | 1,581.83 |
| 1171 | BUB3 Mitotic checkpoint protein BUB3                                                      | IPI00013468,IPI00514701,IPI00644108                         | 37,136.70  | 203 | 216 | VAVEYLDPSPEVQK       | R | K | 1,581.83 |
| 1172 | HSP90AB1 Heat shock protein HSP 90-beta                                                   | IPI00414676                                                 | 83,249.30  | 205 | 221 | HSQFIGYPITLYLEKER    | K | E | 2,102.12 |
| 1173 | HSP90AB1 Heat shock protein HSP 90-beta                                                   | IPI00414676                                                 | 83,249.30  | 205 | 221 | HSQFIGYPITLYLEKER    | K | E | 2,102.12 |
| 1174 | SNRNPB2 U2 small nuclear ribonucleoprotein B"                                             | IPI00029267                                                 | 25,469.50  | 205 | 211 | DALQGFK              | R | I | 786.4237 |
| 1175 | SNRNPB2 U2 small nuclear ribonucleoprotein B"                                             | IPI00029267                                                 | 25,469.50  | 205 | 211 | DALQGFK              | R | I | 786.4237 |
| 1176 | GNB2L1 38 kDa protein                                                                     | IPI00641950,IPI00848226                                     | 37,740.10  | 205 | 212 | VWNLANCK             | K | L | 1,012.51 |
| 1177 | OCIAD1 Isoform 1 of OCIA domain-containing protein 1                                      | IPI00016405                                                 | 27,608.80  | 206 | 217 | NRESYEVSLTQK         | K | T | 1,461.74 |
| 1178 | PSMD10 26S proteasome non-ATPase regulatory subunit 10                                    | IPI00003565,IPI00027699                                     | 24,410.20  | 207 | 213 | TPLQVAK              | K | G | 764.4757 |
| 1179 | PSMD10 26S proteasome non-ATPase regulatory subunit 10                                    | IPI00003565,IPI00027699                                     | 24,410.20  | 207 | 213 | TPLQVAK              | K | G | 764.4757 |
| 1180 | KPNB1 Importin subunit beta-1                                                             | IPI00001639                                                 | 97,153.30  | 207 | 215 | ANFDKESER            | K | H | 1,103.52 |
| 1181 | KPNB1 Importin subunit beta-1                                                             | IPI00001639                                                 | 97,153.30  | 207 | 215 | ANFDKESER            | K | H | 1,103.52 |
| 1182 | KPNB1 Importin subunit beta-1                                                             | IPI00001639                                                 | 97,153.30  | 207 | 215 | ANFDKESER            | K | H | 1,103.52 |
| 1183 | CDC2 Putative uncharacterized protein DKFZp686L2022                                       | IPI00026689,IPI00908424                                     | 34,762.10  | 207 | 221 | KPLFHGDSEIDQLFR      | K | I | 1,809.94 |
| 1184 | HNRNPB Isoform 1 of Heterogeneous nuclear ribonucleoprotein K                             | IPI00216049,IPI00216746,IPI00514561,IPI00807545,IPI00910458 | 50,960.50  | 208 | 219 | IILDISESPIK          | K | G | 1,348.82 |
| 1185 | HNRNPB Isoform 1 of Heterogeneous nuclear ribonucleoprotein K                             | IPI00216049,IPI00216746,IPI00514561,IPI00807545,IPI00910458 | 50,960.50  | 208 | 219 | IILDISESPIK          | K | G | 1,348.82 |
| 1186 | HNRNPB Isoform 1 of Heterogeneous nuclear ribonucleoprotein K                             | IPI00216049,IPI00216746,IPI00514561,IPI00807545,IPI00910458 | 50,960.50  | 208 | 219 | IILDISESPIK          | K | G | 1,348.82 |
| 1187 | HNRNPB Isoform 1 of Heterogeneous nuclear ribonucleoprotein K                             | IPI00216049,IPI00216746,IPI00514561,IPI00807545,IPI00910458 | 50,960.50  | 208 | 219 | IILDISESPIK          | K | G | 1,348.82 |
| 1188 | HNRNPB Isoform 1 of Heterogeneous nuclear ribonucleoprotein K                             | IPI00216049,IPI00216746,IPI00514561,IPI00807545,IPI00910458 | 50,960.50  | 208 | 219 | IILDISESPIK          | K | G | 1,348.82 |
| 1189 | PSMA1 Isoform Short of Proteasome subunit alpha type-1                                    | IPI00016832,IPI00472442                                     | 29,538.00  | 209 | 217 | NVSIGIVGK            | K | D | 894.5499 |
| 1190 | FAR1 cDNA: FLJ22728 fis, clone HSI15617 (Fragment)                                        | IPI00386139,IPI00478838                                     | 38,361.30  | 209 | 221 | ALAEYVVQEGAK         | K | L | 1,413.75 |
| 1191 | EIF2B1 Translation initiation factor eIF-2B subunit alpha                                 | IPI00221300                                                 | 33,695.20  | 210 | 220 | IGTNQMAVCAK          | K | A | 1,216.59 |
| 1192 | HSP90AA1 heat shock protein 90kDa alpha (cytosolic), class A member 1 isoform 1           | IPI00382470,IPI00784295                                     | 98,147.10  | 210 | 222 | TLTIVDTGIGMTK        | R | A | 1,373.74 |
| 1193 | HSP90AA1 heat shock protein 90kDa alpha (cytosolic), class A member 1 isoform 1           | IPI00382470,IPI00784295                                     | 98,147.10  | 210 | 222 | TLTIVDTGIGMTK        | R | A | 1,373.74 |
| 1194 | HSP90AA1 heat shock protein 90kDa alpha (cytosolic), class A member 1 isoform 1           | IPI00382470,IPI00784295                                     | 98,147.10  | 210 | 222 | TLTIVDTGIGMTK        | R | A | 1,357.75 |
| 1195 | PCNA Proliferating cell nuclear antigen                                                   | IPI00021700                                                 | 28,751.30  | 211 | 217 | YLNFFTK              | R | A | 940.5018 |
| 1196 | ST13 Hsc70-interacting protein                                                            | IPI00032826                                                 | 41,314.40  | 211 | 222 | LDYDEDASAMLK         | K | E | 1,394.62 |
| 1197 | ST13 Hsc70-interacting protein                                                            | IPI00032826                                                 | 41,314.40  | 211 | 222 | LDYDEDASAMLK         | K | E | 1,394.62 |
| 1198 | EIF4G2 cDNA FLJ59571, highly similar to Eukaryotic translation initiation factor 4gamma 2 | IPI00015952,IPI00782985                                     | 110,247.70 | 212 | 231 | LAEDAPNFDGPAEAGQPGQK | R | Q | 2,019.95 |
| 1199 | TPI1 Isoform 1 of Triosephosphate isomerase                                               | IPI00465028                                                 | 30,772.80  | 213 | 225 | TATPQQAQEVHEK        | K | L | 1,474.74 |
| 1200 | TPI1 Isoform 1 of Triosephosphate isomerase                                               | IPI00465028                                                 | 30,772.80  | 213 | 225 | TATPQQAQEVHEK        | K | L | 1,474.74 |
| 1201 | TPI1 Isoform 1 of Triosephosphate isomerase                                               | IPI00465028                                                 | 30,772.80  | 213 | 225 | TATPQQAQEVHEK        | K | L | 1,474.74 |
| 1202 | TPI1 Isoform 1 of Triosephosphate isomerase                                               | IPI00465028                                                 | 30,772.80  | 213 | 225 | TATPQQAQEVHEK        | K | L | 1,474.74 |
| 1203 | NUDC Nuclear migration protein nudC                                                       | IPI00550746                                                 | 38,225.70  | 213 | 227 | GQPAIDGELYNEVK       | K | V | 1,653.86 |

|      |                                                                                 |                                                 |            |     |     |                                 |   |   |          |
|------|---------------------------------------------------------------------------------|-------------------------------------------------|------------|-----|-----|---------------------------------|---|---|----------|
| 1204 | GDI2 cDNA FLJ60299, highly similar to Rab GDP dissociation inhibitor beta       | IPI00031461                                     | 51,138.50  | 213 | 222 | IKLYSESLAR                      | R | Y | 1,187.69 |
| 1205 | GDI2 cDNA FLJ60299, highly similar to Rab GDP dissociation inhibitor beta       | IPI00031461                                     | 51,138.50  | 213 | 222 | IKLYSESLAR                      | R | Y | 1,187.69 |
| 1206 | UCHL1 Ubiquitin carboxyl-terminal hydrolase isozyme L1                          | IPI00018352                                     | 24,806.30  | 214 | 221 | FSAVALCK                        | R | A | 903.4848 |
| 1207 | UCHL1 Ubiquitin carboxyl-terminal hydrolase isozyme L1                          | IPI00018352                                     | 24,806.30  | 214 | 221 | FSAVALCK                        | R | A | 903.4848 |
| 1208 | PSMD10 26S proteasome non-ATPase regulatory subunit 10                          | IPI00003565,IPI00027699                         | 24,410.20  | 214 | 222 | GGLGLILKR                       | K | M | 934.629  |
| 1209 | PSMD10 26S proteasome non-ATPase regulatory subunit 10                          | IPI00003565,IPI00027699                         | 24,410.20  | 214 | 222 | GGLGLILKR                       | K | M | 934.629  |
| 1210 | PSMD10 26S proteasome non-ATPase regulatory subunit 10                          | IPI00003565,IPI00027699                         | 24,410.20  | 214 | 221 | GGLGLILK                        | K | R | 778.5279 |
| 1211 | PSMD10 26S proteasome non-ATPase regulatory subunit 10                          | IPI00003565,IPI00027699                         | 24,410.20  | 214 | 221 | GGLGLILK                        | K | R | 778.5279 |
| 1212 | PABPC1 Isoform 1 of Polyadenylate-binding protein 1                             | IPI00008524                                     | 70,653.30  | 214 | 221 | FGPALSVK                        | K | V | 826.4913 |
| 1213 | GNB2L1 38 kDa protein                                                           | IPI00641950,IPI00848226                         | 37,740.10  | 215 | 241 | TNHIGHTGYLNTVTVSPDGSL<br>CASGGK | K | D | 2,751.32 |
| 1214 | HNRNPA2B1 43 kDa protein                                                        | IPI00874030                                     | 43,234.30  | 215 | 229 | GFGFVTFDDHDPVDK                 | R | I | 1,703.78 |
| 1215 | HNRNPA2B1 43 kDa protein                                                        | IPI00874030                                     | 43,234.30  | 215 | 229 | GFGFVTFDDHDPVDK                 | R | I | 1,703.78 |
| 1216 | HNRNPA2B1 43 kDa protein                                                        | IPI00874030                                     | 43,234.30  | 215 | 234 | GFGFVTFDDHDPVDKIVLQK            | R | Y | 2,293.18 |
| 1217 | HNRNPA2B1 43 kDa protein                                                        | IPI00874030                                     | 43,234.30  | 215 | 234 | GFGFVTFDDHDPVDKIVLQK            | R | Y | 2,293.18 |
| 1218 | EIF2S2 Eukaryotic translation initiation factor 2 subunit 2                     | IPI00021728                                     | 38,371.70  | 217 | 227 | TSFVNFDTICK                     | K | L | 1,339.64 |
| 1219 | HNRNPR Heterogeneous nuclear ribonucleoprotein R                                | IPI00012074,IPI00644055,IPI00856037,IPI00910614 | 70,925.80  | 217 | 224 | EAAQEAVK                        | K | L | 853.4505 |
| 1220 | CCT7 T-complex protein 1 subunit eta                                            | IPI00018465                                     | 59,349.80  | 219 | 230 | TFSYAGFEMQPK                    | K | K | 1,429.65 |
| 1221 | PTBP1 Isoform 1 of Polypyrimidine tract-binding protein 1                       | IPI00179964,IPI00183626,IPI00334175             | 57,204.50  | 219 | 238 | NNQFQALLQYADPVSAQHAK            | K | L | 2,251.13 |
| 1222 | PTBP1 Isoform 1 of Polypyrimidine tract-binding protein 1                       | IPI00179964,IPI00183626,IPI00334175             | 57,204.50  | 219 | 238 | NNQFQALLQYADPVSAQHAK            | K | L | 2,251.13 |
| 1223 | ACTR2 Actin-related protein 2                                                   | IPI00005159                                     | 44,743.70  | 220 | 232 | LCYVGYNIEQEQQ                   | K | L | 1,651.79 |
| 1224 | ACTR2 Actin-related protein 2                                                   | IPI00005159                                     | 44,743.70  | 220 | 232 | LCYVGYNIEQEQQ                   | K | L | 1,651.79 |
| 1225 | DNAJB1 DnaJ homolog subfamily B member 1                                        | IPI00015947                                     | 38,027.60  | 223 | 240 | EGDQTSNNIPADIVFVLK              | K | D | 1,968.02 |
| 1226 | HSP90AA1 heat shock protein 90kDa alpha (cytosolic), class A member 1 isoform 1 | IPI00382470,IPI00784295                         | 98,147.10  | 223 | 234 | ADLINNLGTIAK                    | K | S | 1,250.72 |
| 1227 | HSP90AA1 heat shock protein 90kDa alpha (cytosolic), class A member 1 isoform 1 | IPI00382470,IPI00784295                         | 98,147.10  | 223 | 234 | ADLINNLGTIAK                    | K | S | 1,250.72 |
| 1228 | ACAT2 Acetyl-CoA acetyltransferase, cytosolic                                   | IPI00291419                                     | 41,332.40  | 224 | 233 | HGSNIEAMSK                      | R | L | 1,097.51 |
| 1229 | FASN Fatty acid synthase                                                        | IPI00026781                                     | 273,382.00 | 225 | 235 | SEGVAVLLTK                      | R | K | 1,123.68 |
| 1230 | DDX5 Probable ATP-dependent RNA helicase DDX5                                   | IPI00017617                                     | 69,131.70  | 228 | 236 | LIDFLECGK                       | R | T | 1,102.57 |
| 1231 | DDX5 Probable ATP-dependent RNA helicase DDX5                                   | IPI00017617                                     | 69,131.70  | 228 | 236 | LIDFLECGK                       | R | T | 1,102.57 |
| 1232 | DDX5 Probable ATP-dependent RNA helicase DDX5                                   | IPI00017617                                     | 69,131.70  | 228 | 236 | LIDFLECGK                       | R | T | 1,102.57 |
| 1233 | DDX5 Probable ATP-dependent RNA helicase DDX5                                   | IPI00017617                                     | 69,131.70  | 228 | 236 | LIDFLECGK                       | R | T | 1,102.57 |
| 1234 | DDX5 Probable ATP-dependent RNA helicase DDX5                                   | IPI00017617                                     | 69,131.70  | 228 | 236 | LIDFLECGK                       | R | T | 1,102.57 |
| 1235 | TES Isoform 1 of Testin                                                         | IPI00024097,IPI00216425,IPI00873055             | 47,977.60  | 232 | 240 | TQYSCYCCK                       | R | L | 1,277.48 |
| 1236 | TCP1 T-complex protein 1 subunit alpha                                          | IPI00290566                                     | 60,327.20  | 234 | 243 | IACLDLFLQK                      | K | T | 1,202.63 |
| 1237 | KPNB1 Importin subunit beta-1                                                   | IPI00001639                                     | 97,153.30  | 235 | 243 | VAALQNLVK                       | R | I | 963.6077 |
| 1238 | BLVRA Biliverdin reductase A                                                    | IPI00294158                                     | 33,411.00  | 235 | 248 | SGSLENVPNVGVNK                  | K | N | 1,421.75 |
| 1239 | BLVRA Biliverdin reductase A                                                    | IPI00294158                                     | 33,411.00  | 235 | 248 | SGSLENVPNVGVNK                  | K | N | 1,421.75 |
| 1240 | OClAD1 Isoform 1 of OCIA domain-containing protein 1                            | IPI00016405                                     | 27,608.80  | 236 | 245 | VNKYGDTWDE                      | K | - | 1,234.55 |
| 1241 | PSAT1 cDNA FLJ56437, highly similar to Phosphoserine aminotransferase           | IPI00001734                                     | 45,338.10  | 236 | 245 | FGVIFAGAQK                      | K | N | 1,045.59 |



|      |                                                                                         |                                     |           |     |     |                     |   |   |          |
|------|-----------------------------------------------------------------------------------------|-------------------------------------|-----------|-----|-----|---------------------|---|---|----------|
| 1242 | PSAT1 cDNA FLJ56437, highly similar to Phosphoserine aminotransferase                   | IPI00001734                         | 45,338.10 | 236 | 245 | FGVIFAGAQK          | K | N | 1,045.59 |
| 1243 | CCT3 chaperonin containing TCP1, subunit 3 isoform b                                    | IPI00290770,IPI00552715,IPI00553185 | 60,446.30 | 237 | 247 | IVLLDSSLEYK         | R | K | 1,287.73 |
| 1244 | CCT3 chaperonin containing TCP1, subunit 3 isoform b                                    | IPI00290770,IPI00552715,IPI00553185 | 60,446.30 | 237 | 247 | IVLLDSSLEYK         | R | K | 1,287.73 |
| 1245 | ANP32A Acidic leucine-rich nuclear phosphoprotein 32 family member A                    | IPI00025849                         | 28,568.10 | 238 | 249 | KREPEDEGEDDD        | R | - | 1,441.58 |
| 1246 | ANP32A Acidic leucine-rich nuclear phosphoprotein 32 family member A                    | IPI00025849                         | 28,568.10 | 238 | 249 | KREPEDEGEDDD        | R | - | 1,441.58 |
| 1247 | NP cDNA FLJ25678 fis, clone TST04067, highly similar to PURINE NUCLEOSIDE PHOSPHORYLASE | IPI00017672,IPI00871140             | 32,533.50 | 239 | 248 | VFGFSLITNK          | R | V | 1,133.64 |
| 1248 | NP cDNA FLJ25678 fis, clone TST04067, highly similar to PURINE NUCLEOSIDE PHOSPHORYLASE | IPI00017672,IPI00871140             | 32,533.50 | 239 | 248 | VFGFSLITNK          | R | V | 1,133.64 |
| 1249 | NPM1 Isoform 1 of Nucleophosmin                                                         | IPI00549248                         | 32,557.40 | 240 | 248 | GPSSVEDIK           | K | A | 939.4874 |
| 1250 | NPM1 Isoform 1 of Nucleophosmin                                                         | IPI00549248                         | 32,557.40 | 240 | 248 | GPSSVEDIK           | K | A | 939.4874 |
| 1251 | NUDC Nuclear migration protein nudC                                                     | IPI00550746                         | 38,225.70 | 240 | 247 | VVTVHLEK            | K | I | 932.5655 |
| 1252 | NPM1 Isoform 1 of Nucleophosmin                                                         | IPI00549248                         | 32,557.40 | 240 | 250 | GPSSVEDIKAK         | K | M | 1,146.63 |
| 1253 | NPM1 Isoform 1 of Nucleophosmin                                                         | IPI00549248                         | 32,557.40 | 240 | 250 | GPSSVEDIKAK         | K | M | 1,146.63 |
| 1254 | NPM1 Isoform 1 of Nucleophosmin                                                         | IPI00549248                         | 32,557.40 | 240 | 250 | GPSSVEDIKAK         | K | M | 1,146.63 |
| 1255 | TKT cDNA FLJ54957, highly similar to Transketolase                                      | IPI00643920                         | 68,725.40 | 241 | 249 | HQPTAIAK            | K | T | 986.5874 |
| 1256 | TKT cDNA FLJ54957, highly similar to Transketolase                                      | IPI00643920                         | 68,725.40 | 241 | 249 | HQPTAIAK            | K | T | 986.5874 |
| 1257 | GNB2L1 38 kDa protein                                                                   | IPI00641950,IPI00848226             | 37,740.10 | 242 | 254 | DGQAMLWDLNEGK       | K | H | 1,500.69 |
| 1258 | GNB2L1 38 kDa protein                                                                   | IPI00641950,IPI00848226             | 37,740.10 | 242 | 254 | DGQAMLWDLNEGK       | K | H | 1,500.69 |
| 1259 | PSMA1 Isoform Short of Proteasome subunit alpha type-1                                  | IPI00016832,IPI00472442             | 29,538.00 | 244 | 263 | AQAQPADEPAEKADPEMEH | K | - | 2,184.96 |
| 1260 | TPI1 Isoform 1 of Triosephosphate isomerase                                             | IPI00465028                         | 30,772.80 | 244 | 256 | IYGGSVTGATCK        | R | E | 1,334.69 |
| 1261 | TPI1 Isoform 1 of Triosephosphate isomerase                                             | IPI00465028                         | 30,772.80 | 244 | 256 | IYGGSVTGATCK        | R | E | 1,334.69 |
| 1262 | TPI1 Isoform 1 of Triosephosphate isomerase                                             | IPI00465028                         | 30,772.80 | 244 | 256 | IYGGSVTGATCK        | R | E | 1,334.69 |
| 1263 | TPI1 Isoform 1 of Triosephosphate isomerase                                             | IPI00465028                         | 30,772.80 | 244 | 256 | IYGGSVTGATCK        | R | E | 1,334.69 |
| 1264 | TPI1 Isoform 1 of Triosephosphate isomerase                                             | IPI00465028                         | 30,772.80 | 244 | 256 | IYGGSVTGATCK        | R | E | 1,334.69 |
| 1265 | NUP43 cDNA FLJ38675 fis, clone IMR322000243, highly similar to Nucleoporin Nup43        | IPI00171664,IPI00742943             | 48,466.40 | 244 | 257 | TPEILTVNSIGQLK      | R | I | 1,520.88 |
| 1266 | TALDO1 Transaldolase                                                                    | IPI00744692                         | 37,523.70 | 246 | 258 | ALAGCDFLTISPK       | K | L | 1,400.73 |
| 1267 | TALDO1 Transaldolase                                                                    | IPI00744692                         | 37,523.70 | 246 | 258 | ALAGCDFLTISPK       | K | L | 1,400.73 |
| 1268 | TALDO1 Transaldolase                                                                    | IPI00744692                         | 37,523.70 | 246 | 258 | ALAGCDFLTISPK       | K | L | 1,400.73 |
| 1269 | CCT4 T-complex protein 1 subunit delta                                                  | IPI00302927,IPI00873222             | 57,907.90 | 246 | 257 | IGLIQFCLSAPK        | K | T | 1,354.76 |
| 1270 | PDLIM1 PDZ and LIM domain protein 1                                                     | IPI00010414                         | 36,053.30 | 247 | 256 | VAASIGNAQK          | K | L | 966.5458 |
| 1271 | PDLIM1 PDZ and LIM domain protein 1                                                     | IPI00010414                         | 36,053.30 | 247 | 256 | VAASIGNAQK          | K | L | 966.5458 |
| 1272 | EEF1A2 Elongation factor 1-alpha 2                                                      | IPI00014424                         | 50,452.60 | 248 | 255 | LPLQDVYK            | R | I | 983.5653 |
| 1273 | EEF1A1 Elongation factor 1-alpha 1                                                      | IPI00396485,IPI00472724             | 50,123.20 | 248 | 255 | LPLQDVYK            | R | I | 983.5653 |
| 1274 | G3BP1 Ras GTPase-activating protein-binding protein 1                                   | IPI00012442                         | 52,144.80 | 248 | 257 | TFSWASVTSK          | R | N | 1,121.57 |
| 1275 | PCNA Proliferating cell nuclear antigen                                                 | IPI00021700                         | 28,751.30 | 249 | 261 | YYLAPKIEDEEGS       | K | - | 1,521.72 |
| 1276 | TUBB2B Tubulin beta-2B chain                                                            | IPI00031370                         | 49,935.10 | 252 | 262 | KLAVNMVFPFR         | R | L | 1,279.74 |
| 1277 | TUBB2C Tubulin beta-2C chain                                                            | IPI00007752                         | 49,812.70 | 252 | 262 | KLAVNMVFPFR         | R | L | 1,279.74 |
| 1278 | TUBB Tubulin beta chain                                                                 | IPI00011654                         | 49,652.60 | 252 | 262 | KLAVNMVFPFR         | R | L | 1,279.74 |
| 1279 | TUBB2B Tubulin beta-2B chain                                                            | IPI00031370                         | 49,935.10 | 252 | 262 | KLAVNMVFPFR         | R | L | 1,295.74 |
| 1280 | TUBB Tubulin beta chain                                                                 | IPI00011654                         | 49,652.60 | 252 | 262 | KLAVNMVFPFR         | R | L | 1,295.74 |
| 1281 | TUBB2C Tubulin beta-2C chain                                                            | IPI00007752                         | 49,812.70 | 252 | 262 | KLAVNMVFPFR         | R | L | 1,295.74 |
| 1282 | TCEA1 Isoform 1 of Transcription elongation factor A protein 1                          | IPI00333215                         | 33,952.60 | 253 | 265 | TGGTQTDLFTCGK       | K | C | 1,393.65 |
| 1283 | TCEA1 Isoform 1 of Transcription elongation factor A protein 1                          | IPI00333215                         | 33,952.60 | 253 | 265 | TGGTQTDLFTCGK       | K | C | 1,393.65 |



|      |                                                                                         |                                                 |           |     |     |                            |   |   |          |
|------|-----------------------------------------------------------------------------------------|-------------------------------------------------|-----------|-----|-----|----------------------------|---|---|----------|
| 1284 | AASDHPPT L-aminoadipate-semialdehyde dehydrogenase-phosphopantetheinyl transferase      | IPI00250297                                     | 35,759.10 | 253 | 267 | HQDVPSQDDSKPTQR            | R | Q | 1,745.83 |
| 1285 | AASDHPPT L-aminoadipate-semialdehyde dehydrogenase-phosphopantetheinyl transferase      | IPI00250297                                     | 35,759.10 | 253 | 267 | HQDVPSQDDSKPTQR            | R | Q | 1,745.83 |
| 1286 | ENO1 Isoform alpha-enolase of Alpha-enolase                                             | IPI00465248                                     | 47,152.20 | 254 | 262 | SGKYDLDFK                  | R | S | 1,088.56 |
| 1287 | ENO1 Isoform alpha-enolase of Alpha-enolase                                             | IPI00465248                                     | 47,152.20 | 254 | 262 | SGKYDLDFK                  | R | S | 1,088.56 |
| 1288 | ENO1 Isoform alpha-enolase of Alpha-enolase                                             | IPI00465248                                     | 47,152.20 | 254 | 269 | SGKYDLDFKSPDDPSR           | R | Y | 1,842.88 |
| 1289 | DDX17 DEAD box polypeptide 17 isoform 1                                                 | IPI00023785,IPI00651653,IPI00651677,IPI00889541 | 80,256.00 | 255 | 269 | ELAQQVQQVADDYGK            | R | C | 1,699.84 |
| 1290 | NUDC Nuclear migration protein nudC                                                     | IPI00550746                                     | 38,225.70 | 257 | 267 | LVSSDPEINTK                | R | K | 1,210.64 |
| 1291 | NUDC Nuclear migration protein nudC                                                     | IPI00550746                                     | 38,225.70 | 257 | 267 | LVSSDPEINTK                | R | K | 1,210.64 |
| 1292 | TALDO1 Transaldolase                                                                    | IPI00744692                                     | 37,523.70 | 259 | 269 | LLGELLQDNAK                | K | L | 1,221.69 |
| 1293 | TALDO1 Transaldolase                                                                    | IPI00744692                                     | 37,523.70 | 259 | 269 | LLGELLQDNAK                | K | L | 1,221.69 |
| 1294 | NP cDNA FLJ25678 fis, clone TST04067, highly similar to PURINE NUCLEOSIDE PHOSPHORYLASE | IPI00017672,IPI00871140                         | 32,533.50 | 259 | 269 | ANHEEVLAAGK                | K | Q | 1,146.60 |
| 1295 | NP cDNA FLJ25678 fis, clone TST04067, highly similar to PURINE NUCLEOSIDE PHOSPHORYLASE | IPI00017672,IPI00871140                         | 32,533.50 | 259 | 269 | ANHEEVLAAGK                | K | Q | 1,146.60 |
| 1296 | CDC2 Putative uncharacterized protein DKFZp686L20222                                    | IPI00026689,IPI00908424                         | 34,762.10 | 261 | 272 | NLDENGLDLSK                | K | M | 1,338.70 |
| 1297 | CDC2 Putative uncharacterized protein DKFZp686L20222                                    | IPI00026689,IPI00908424                         | 34,762.10 | 261 | 272 | NLDENGLDLSK                | K | M | 1,338.70 |
| 1298 | CDC2 Putative uncharacterized protein DKFZp686L20222                                    | IPI00026689,IPI00908424                         | 34,762.10 | 261 | 272 | NLDENGLDLSK                | K | M | 1,338.70 |
| 1299 | CDC2 Putative uncharacterized protein DKFZp686L20222                                    | IPI00026689,IPI00908424                         | 34,762.10 | 261 | 272 | NLDENGLDLSK                | K | M | 1,338.70 |
| 1300 | (Bos taurus) similar to alpha-tubulin I isoform 1                                       | CON_00700865,IPI00387144,IPI00792677            | 50,133.70 | 265 | 280 | IHFPLATYAPVISA EK          | R | A | 1,764.98 |
| 1301 | SF3A3 Splicing factor 3A subunit 3                                                      | IPI00029764,IPI00908449                         | 58,833.30 | 265 | 273 | SALLALGLK                  | K | C | 893.5911 |
| 1302 | PRKAR1A cAMP-dependent protein kinase type I-alpha regulatory subunit                   | IPI00021831                                     | 42,964.40 | 265 | 281 | LTVADALEPVQFEDGQK          | R | I | 1,867.95 |
| 1303 | TCP1 T-complex protein 1 subunit alpha                                                  | IPI00290566                                     | 60,327.20 | 267 | 274 | ESDITKER                   | R | I | 985.5041 |
| 1304 | EEF1A1 Elongation factor 1-alpha 1                                                      | IPI00396485,IPI00472724                         | 50,123.20 | 267 | 290 | TEVK VETGVLKPGMVVTFAPVNVT  | R | S | 2,531.41 |
| 1305 | EEF1A1 Elongation factor 1-alpha 1                                                      | IPI00396485,IPI00472724                         | 50,123.20 | 267 | 290 | TEVK VETGVLKPGMVVTFAPVNVT  | R | S | 2,547.41 |
| 1306 | RPLP0 60S acidic ribosomal protein P0                                                   | IPI00008530                                     | 34,256.30 | 267 | 297 | TEVK AFLADPSAFVAAAPVAAATTA | K | V | 2,760.48 |
| 1307 | ENO1 Isoform alpha-enolase of Alpha-enolase                                             | IPI00465248                                     | 47,152.20 | 270 | 281 | APAAAAAPAK YISPDQLADLYK    | R | S | 1,433.74 |
| 1308 | ENO1 Isoform alpha-enolase of Alpha-enolase                                             | IPI00465248                                     | 47,152.20 | 270 | 281 | YISPDQLADLYK               | R | S | 1,433.74 |
| 1309 | DDX17 DEAD box polypeptide 17 isoform 1                                                 | IPI00023785,IPI00651653,IPI00651677,IPI00889541 | 80,256.00 | 275 | 284 | STCIYGGAPK                 | K | G | 1,061.52 |
| 1310 | GNB2L1 38 kDa protein                                                                   | IPI00641950,IPI00848226                         | 37,740.10 | 275 | 286 | YWLCAATGPSIK               | R | I | 1,374.70 |
| 1311 | GNB2L1 38 kDa protein                                                                   | IPI00641950,IPI00848226                         | 37,740.10 | 275 | 286 | YWLCAATGPSIK               | R | I | 1,374.70 |
| 1312 | HSP90AB1 Heat shock protein HSP 90-beta                                                 | IPI00414676                                     | 83,249.30 | 276 | 284 | YIDQEELNK                  | K | T | 1,159.57 |
| 1313 | HSP90AB1 Heat shock protein HSP 90-beta                                                 | IPI00414676                                     | 83,249.30 | 276 | 284 | YIDQEELNK                  | K | T | 1,159.57 |
| 1314 | HSP90AB1 Heat shock protein HSP 90-beta                                                 | IPI00414676                                     | 83,249.30 | 276 | 284 | YIDQEELNK                  | K | T | 1,159.57 |
| 1315 | TALDO1 Transaldolase                                                                    | IPI00744692                                     | 37,523.70 | 278 | 286 | AAQASDLEK                  | K | I | 940.4826 |
| 1316 | TUBB Tubulin beta chain                                                                 | IPI00011654                                     | 49,652.60 | 283 | 297 | ALTVP ELTQQVFDAK           | R | N | 1,667.91 |
| 1317 | TUBB2B Tubulin beta-2B chain                                                            | IPI00031370                                     | 49,935.10 | 283 | 297 | ALTVP ELTQQMFDSK           | R | N | 1,715.88 |
| 1318 | TUBB2C Tubulin beta-2C chain                                                            | IPI00007752                                     | 49,812.70 | 283 | 297 | ALTVP ELTQQMFDAK           | R | N | 1,715.88 |
| 1319 | TUBB Tubulin beta chain                                                                 | IPI00011654                                     | 49,652.60 | 283 | 297 | ALTVP ELTQQVFDAK           | R | N | 1,667.91 |
| 1320 | TUBB2B Tubulin beta-2B chain                                                            | IPI00031370                                     | 49,935.10 | 283 | 297 | ALTVP ELTQQMFDSK           | R | N | 1,731.87 |
| 1321 | TUBB Tubulin beta chain                                                                 | IPI00011654                                     | 49,652.60 | 283 | 297 | ALTVP ELTQQVFDAK           | R | N | 1,667.91 |
| 1322 | TUBB2C Tubulin beta-2C chain                                                            | IPI00007752                                     | 49,812.70 | 283 | 297 | ALTVP ELTQQMFDAK           | R | N | 1,715.88 |
| 1323 | DNAJA1 DnaJ homolog subfamily A member 1                                                | IPI00012535                                     | 44,850.60 | 284 | 296 | TIVITSHPGQIVK              | R | H | 1,400.84 |
| 1324 | CAPZB Isoform 1 of F-actin-capping protein subunit beta                                 | IPI00026185,IPI00218782,IPI00641107,IPI00642256 | 37,465.40 | 289 | 298 | STLNEIFYGK                 | R | T | 1,179.61 |
| 1325 | RARS Isoform Complexed of Arginyl-tRNA synthetase. cytoplasmic                          | IPI00004860                                     | 75,364.00 | 290 | 300 | AYQCVVLLQGK                | R | N | 1,286.70 |

|      |                                                                                 |                                                             |           |     |     |                      |   |   |          |
|------|---------------------------------------------------------------------------------|-------------------------------------------------------------|-----------|-----|-----|----------------------|---|---|----------|
| 1326 | RARS Isoform Complexed of Arginyl-tRNA synthetase, cytoplasmic                  | IPI00004860                                                 | 75,364.00 | 290 | 300 | AYQCVLLQ GK          | R | N | 1,286.70 |
| 1327 | SF3A3 Splicing factor 3A subunit 3                                              | IPI00029764,IPI00908449                                     | 58,833.30 | 292 | 303 | SLESLDTSLFAK         | K | N | 1,318.70 |
| 1328 | SF3A3 Splicing factor 3A subunit 3                                              | IPI00029764,IPI00908449                                     | 58,833.30 | 292 | 303 | SLESLDTSLFAK         | K | N | 1,318.70 |
| 1329 | HSP90AB1 Heat shock protein HSP 90-beta                                         | IPI00414676                                                 | 83,249.30 | 292 | 306 | NPDDITQEEYGEFYK      | R | S | 1,855.81 |
| 1330 | HSP90AB1 Heat shock protein HSP 90-beta                                         | IPI00414676                                                 | 83,249.30 | 292 | 306 | NPDDITQEEYGEFYK      | R | S | 1,855.81 |
| 1331 | HSP90AB1 Heat shock protein HSP 90-beta                                         | IPI00414676                                                 | 83,249.30 | 292 | 306 | NPDDITQEEYGEFYK      | R | S | 1,855.81 |
| 1332 | HSP90AB1 Heat shock protein HSP 90-beta                                         | IPI00414676                                                 | 83,249.30 | 292 | 306 | NPDDITQEEYGEFYK      | R | S | 1,855.81 |
| 1333 | HSP90AB1 Heat shock protein HSP 90-beta                                         | IPI00414676                                                 | 83,249.30 | 292 | 306 | NPDDITQEEYGEFYK      | R | S | 1,855.81 |
| 1334 | ACTR1A Alpha-centractin                                                         | IPI00029468,IPI00908883                                     | 42,597.20 | 293 | 308 | TLFSNIVLSGGSTLFLK    | R | G | 1,691.95 |
| 1335 | GNB2L1 38 kDa protein                                                           | IPI00641950,IPI00848226                                     | 37,740.10 | 294 | 309 | IIVDELKQEVISTSSK     | K | A | 1,805.02 |
| 1336 | GNB2L1 38 kDa protein                                                           | IPI00641950,IPI00848226                                     | 37,740.10 | 294 | 309 | IIVDELKQEVISTSSK     | K | A | 1,805.02 |
| 1337 | GNB2L1 38 kDa protein                                                           | IPI00641950,IPI00848226                                     | 37,740.10 | 294 | 309 | IIVDELKQEVISTSSK     | K | A | 1,805.02 |
| 1338 | UNG Isoform 2 of Uracil-DNA glycosylase                                         | IPI00011069                                                 | 34,627.40 | 296 | 302 | TNELLQK              | K | S | 853.487  |
| 1339 | TARS Threonyl-tRNA synthetase, cytoplasmic                                      | IPI00329633,IPI00908949                                     | 83,419.80 | 297 | 306 | YIGSIFPDPK           | R | M | 1,144.61 |
| 1340 | TARS Threonyl-tRNA synthetase, cytoplasmic                                      | IPI00329633,IPI00908949                                     | 83,419.80 | 297 | 306 | YIGSIFPDPK           | R | M | 1,144.61 |
| 1341 | SFPQ Isoform Long of Splicing factor, proline- and glutamine-rich               | IPI00010740                                                 | 76,131.50 | 299 | 315 | LFVGNLPADITEDEFKR    | R | L | 1,972.03 |
| 1342 | BZW1 Isoform 2 of Basic leucine zipper and W2 domain-containing protein 1       | IPI00180128,IPI00785096,IPI00916112,IPI00916503,IPI00918019 | 40,522.00 | 303 | 313 | AEVLSEEPILK          | K | W | 1,235.70 |
| 1343 | PSMD13 proteasome 26S non-ATPase subunit 13 isoform 2                           | IPI00375380,IPI00549672                                     | 42,924.90 | 304 | 315 | ITVNEVELLMVK         | K | A | 1,411.80 |
| 1344 | PSMD13 proteasome 26S non-ATPase subunit 13 isoform 2                           | IPI00375380,IPI00549672                                     | 42,924.90 | 304 | 315 | ITVNEVELLMVK         | K | A | 1,411.80 |
| 1345 | HSP90AB1 Heat shock protein HSP 90-beta                                         | IPI00414676                                                 | 83,249.30 | 307 | 319 | SLTNDWEDHLAVK        | K | H | 1,535.76 |
| 1346 | HSP90AB1 Heat shock protein HSP 90-beta                                         | IPI00414676                                                 | 83,249.30 | 307 | 319 | SLTNDWEDHLAVK        | K | H | 1,535.76 |
| 1347 | ENO1 Isoform alpha-enolase of Alpha-enolase                                     | IPI00465248                                                 | 47,152.20 | 307 | 326 | FTASAGIQVVGDDLTVTNPK | K | R | 2,041.07 |
| 1348 | HSP90AA1 heat shock protein 90kDa alpha (cytosolic), class A member 1 isoform 1 | IPI00382470,IPI00784295                                     | 98,147.10 | 308 | 323 | VILHLKEDQTEYLEER     | K | R | 2,023.06 |
| 1349 | HSP90AA1 heat shock protein 90kDa alpha (cytosolic), class A member 1 isoform 1 | IPI00382470,IPI00784295                                     | 98,147.10 | 308 | 323 | VILHLKEDQTEYLEER     | K | R | 2,023.06 |
| 1350 | PABPC1 Isoform 1 of Polyadenylate-binding protein 1                             | IPI00008524                                                 | 70,653.30 | 313 | 324 | EFSPFGTITSAK         | K | V | 1,292.66 |
| 1351 | PABPC4 Isoform 1 of Polyadenylate-binding protein 4                             | IPI00012726,IPI00555747,IPI00642904,IPI00642944             | 70,765.80 | 313 | 324 | EFSPFGSITSAK         | K | V | 1,278.65 |
| 1352 | EIF2S2 Eukaryotic translation initiation factor 2 subunit 2                     | IPI00021728                                                 | 38,371.70 | 316 | 324 | TGFQAVTQK            | K | R | 916.4979 |
| 1353 | XRCC5 ATP-dependent DNA helicase 2 subunit 2                                    | IPI00220834,IPI00871391                                     | 82,689.10 | 316 | 325 | YGSDIVPFSK           | R | V | 1,120.58 |
| 1354 | SSB Lupus La protein                                                            | IPI00009032,IPI00916802                                     | 46,821.00 | 318 | 328 | IIEDQQESLNK          | K | W | 1,324.68 |
| 1355 | SSB Lupus La protein                                                            | IPI00009032,IPI00916802                                     | 46,821.00 | 318 | 328 | IIEDQQESLNK          | K | W | 1,324.68 |
| 1356 | TKT cDNA FLJ54957, highly similar to Transketolase                              | IPI00643920                                                 | 68,725.40 | 319 | 326 | VGDKIATR             | K | K | 867.5139 |
| 1357 | SFPQ Isoform Long of Splicing factor, proline- and glutamine-rich               | IPI00010740                                                 | 76,131.50 | 320 | 330 | YGEPGEVFINK          | K | G | 1,260.64 |
| 1358 | TUBB2B Tubulin beta-2B chain                                                    | IPI00031370                                                 | 49,935.10 | 321 | 336 | MSMKEVDEQMLNVQNK     | R | N | 1,987.91 |
| 1359 | TUBB Tubulin beta chain                                                         | IPI00011654                                                 | 49,652.60 | 321 | 336 | MSMKEVDEQMLNVQNK     | R | N | 1,987.91 |
| 1360 | TUBB2C Tubulin beta-2C chain                                                    | IPI00007752                                                 | 49,812.70 | 321 | 336 | MSMKEVDEQMLNVQNK     | R | N | 1,987.91 |
| 1361 | ALDOA Fructose-bisphosphate aldolase A                                          | IPI00465439,IPI00796333                                     | 39,402.60 | 323 | 331 | AAQEYVKR             | K | A | 1,101.58 |
| 1362 | GAPDH Glycerinaldehyde-3-phosphate dehydrogenase                                | IPI00219018                                                 | 36,035.30 | 324 | 335 | VVDLMAHMASKE         | R | - | 1,370.65 |
| 1363 | TUBB2B Tubulin beta-2B chain                                                    | IPI00031370                                                 | 49,935.10 | 325 | 336 | EVDEQMLNVQNK         | K | N | 1,470.70 |
| 1364 | TUBB2C Tubulin beta-2C chain                                                    | IPI00007752                                                 | 49,812.70 | 325 | 336 | EVDEQMLNVQNK         | K | N | 1,470.70 |
| 1365 | TUBB Tubulin beta chain                                                         | IPI00011654                                                 | 49,652.60 | 325 | 336 | EVDEQMLNVQNK         | K | N | 1,470.70 |
| 1366 | TUBB2B Tubulin beta-2B chain                                                    | IPI00031370                                                 | 49,935.10 | 325 | 336 | EVDEQMLNVQNK         | K | N | 1,470.70 |
| 1367 | TUBB Tubulin beta chain                                                         | IPI00011654                                                 | 49,652.60 | 325 | 336 | EVDEQMLNVQNK         | K | N | 1,470.70 |
| 1368 | TUBB2C Tubulin beta-2C chain                                                    | IPI00007752                                                 | 49,812.70 | 325 | 336 | EVDEQMLNVQNK         | K | N | 1,470.70 |
| 1369 | NONO Non-POU domain-containing octamer-binding protein                          | IPI00304596                                                 | 54,213.60 | 325 | 336 | RMEELHNQEVQK         | R | R | 1,564.76 |

|      |                                                                    |                                                 |           |     |     |                            |   |   |          |
|------|--------------------------------------------------------------------|-------------------------------------------------|-----------|-----|-----|----------------------------|---|---|----------|
| 1370 | HSPA8 Isoform 1 of Heat shock cognate 71 kDa protein               | IPI00003865                                     | 70,881.80 | 326 | 342 | LDKSQIHDIVLVGGSTR          | K | I | 1,846.03 |
| 1371 | HSPA8 Isoform 1 of Heat shock cognate 71 kDa protein               | IPI00003865                                     | 70,881.80 | 326 | 342 | LDKSQIHDIVLVGGSTR          | K | I | 1,846.03 |
| 1372 | HNRNPH1 Heterogeneous nuclear ribonucleoprotein H                  | IPI00013881,IPI00479191                         | 49,211.80 | 327 | 347 | VTGEADVFEFATHEDAVAAMS<br>K | R | D | 2,202.01 |
| 1373 | (Bos taurus) similar to alpha-tubulin I isoform 1                  | CON_00700865,IPI00387144,IPI00792677            | 50,133.70 | 327 | 336 | DVNAAIATIK                 | K | T | 1,023.59 |
| 1374 | (Bos taurus) similar to alpha-tubulin I isoform 1                  | CON_00700865,IPI00387144,IPI00792677            | 50,133.70 | 327 | 336 | DVNAAIATIK                 | K | T | 1,023.59 |
| 1375 | (Bos taurus) similar to alpha-tubulin I isoform 1                  | CON_00700865,IPI00387144,IPI00792677            | 50,133.70 | 327 | 336 | DVNAAIATIK                 | K | T | 1,023.59 |
| 1376 | FKBP4 FK506-binding protein 4                                      | IPI00219005                                     | 51,787.90 | 332 | 344 | LQAFSAAIESCNK              | K | A | 1,446.71 |
| 1377 | FKBP4 FK506-binding protein 4                                      | IPI00219005                                     | 51,787.90 | 332 | 344 | LQAFSAAIESCNK              | K | A | 1,446.71 |
| 1378 | FKBP4 FK506-binding protein 4                                      | IPI00219005                                     | 51,787.90 | 332 | 344 | LQAFSAAIESCNK              | K | A | 1,446.71 |
| 1379 | ALDOA Fructose-bisphosphate aldolase A                             | IPI00465439,IPI00796333                         | 39,402.60 | 332 | 342 | ALANSLACQGK                | R | Y | 1,140.59 |
| 1380 | PABPC1 Isoform 1 of Polyadenylate-binding protein 1                | IPI00008524                                     | 70,653.30 | 334 | 348 | GFGFVCFSSPEEATK            | K | A | 1,670.76 |
| 1381 | PABPC1 Isoform 1 of Polyadenylate-binding protein 1                | IPI00008524                                     | 70,653.30 | 334 | 348 | GFGFVCFSSPEEATK            | K | A | 1,670.76 |
| 1382 | PABPC1 Isoform 1 of Polyadenylate-binding protein 1                | IPI00008524                                     | 70,653.30 | 334 | 348 | GFGFVCFSSPEEATK            | K | A | 1,670.76 |
| 1383 | PABPC1 Isoform 1 of Polyadenylate-binding protein 1                | IPI00008524                                     | 70,653.30 | 334 | 348 | GFGFVCFSSPEEATK            | K | A | 1,670.76 |
| 1384 | ENO1 Isoform alpha-enolase of Alpha-enolase                        | IPI00465248                                     | 47,152.20 | 336 | 343 | SCNCLLLK                   | K | V | 1,015.52 |
| 1385 | ENO1 Isoform alpha-enolase of Alpha-enolase                        | IPI00465248                                     | 47,152.20 | 336 | 343 | SCNCLLLK                   | K | V | 1,015.52 |
| 1386 | PLS3 plastin 3                                                     | IPI00216694                                     | 70,795.90 | 337 | 346 | AESMLQQADK                 | R | L | 1,144.54 |
| 1387 | PLS3 plastin 3                                                     | IPI00216694                                     | 70,795.90 | 337 | 346 | AESMLQQADK                 | R | L | 1,144.54 |
| 1388 | HNRNPA1 Isoform A1-B of Heterogeneous nuclear ribonucleoprotein A1 | IPI00215965,IPI00465365                         | 38,828.10 | 337 | 352 | SSGPYGGGGQYFAKPR           | R | N | 1,636.80 |
| 1389 | HNRNPA1 Isoform A1-B of Heterogeneous nuclear ribonucleoprotein A1 | IPI00215965,IPI00465365                         | 38,828.10 | 337 | 352 | SSGPYGGGGQYFAKPR           | R | N | 1,636.80 |
| 1390 | HNRNPA1 Isoform A1-B of Heterogeneous nuclear ribonucleoprotein A1 | IPI00215965,IPI00465365                         | 38,828.10 | 337 | 352 | SSGPYGGGGQYFAKPR           | R | N | 1,636.80 |
| 1391 | TUBB Tubulin beta chain                                            | IPI00011654                                     | 49,652.60 | 337 | 350 | NSSYFVEWIPNNVK             | K | T | 1,704.85 |
| 1392 | TUBB2B Tubulin beta-2B chain                                       | IPI00031370                                     | 49,935.10 | 337 | 350 | NSSYFVEWIPNNVK             | K | T | 1,704.85 |
| 1393 | TUBB2C Tubulin beta-2C chain                                       | IPI00007752                                     | 49,812.70 | 337 | 350 | NSSYFVEWIPNNVK             | K | T | 1,704.85 |
| 1394 | TUBB Tubulin beta chain                                            | IPI00011654                                     | 49,652.60 | 337 | 350 | NSSYFVEWIPNNVK             | K | T | 1,704.85 |
| 1395 | HSP90AB1 Heat shock protein HSP 90-beta                            | IPI00414676                                     | 83,249.30 | 339 | 347 | APFDLDFENK                 | R | K | 1,088.55 |
| 1396 | COPG2 Coatomer subunit gamma-2                                     | IPI00002557                                     | 97,606.50 | 339 | 350 | SIATLAIITLLK               | R | T | 1,252.80 |
| 1397 | (Bos taurus) similar to alpha-tubulin I isoform 1                  | CON_00700865,IPI00387144,IPI00792677            | 50,133.70 | 340 | 352 | SIQFVDWCPTGFK              | R | V | 1,592.77 |
| 1398 | (Bos taurus) similar to alpha-tubulin I isoform 1                  | CON_00700865,IPI00387144,IPI00792677            | 50,133.70 | 340 | 352 | SIQFVDWCPTGFK              | R | V | 1,592.77 |
| 1399 | PSMD13 proteasome 26S non-ATPase subunit 13 isoform 2              | IPI00375380,IPI00549672                         | 42,924.90 | 342 | 349 | VLDLQQIK                   | R | G | 964.5919 |
| 1400 | SFPQ Isoform Long of Splicing factor, proline- and glutamine-rich  | IPI00010740                                     | 76,131.50 | 343 | 349 | ALAEIAK                    | R | A | 723.4491 |
| 1401 | LAP3 Isoform 1 of Cytosol aminopeptidase                           | IPI00419237,IPI00789806,IPI00910169             | 56,149.70 | 343 | 351 | ANKPGDVVR                  | K | A | 963.5462 |
| 1402 | ENO1 Isoform alpha-enolase of Alpha-enolase                        | IPI00465248                                     | 47,152.20 | 344 | 358 | VNQIGSVTESLQACK            | K | L | 1,641.84 |
| 1403 | ENO1 Isoform alpha-enolase of Alpha-enolase                        | IPI00465248                                     | 47,152.20 | 344 | 358 | VNQIGSVTESLQACK            | K | L | 1,641.84 |
| 1404 | ENO1 Isoform alpha-enolase of Alpha-enolase                        | IPI00465248                                     | 47,152.20 | 344 | 358 | VNQIGSVTESLQACK            | K | L | 1,641.84 |
| 1405 | ENO1 Isoform alpha-enolase of Alpha-enolase                        | IPI00465248                                     | 47,152.20 | 344 | 358 | VNQIGSVTESLQACK            | K | L | 1,641.84 |
| 1406 | MAT2A S-adenosylmethionine synthetase isoform type-2               | IPI00010157                                     | 43,642.80 | 344 | 351 | ELLEIVKK                   | R | N | 987.6421 |
| 1407 | FKBP4 FK506-binding protein 4                                      | IPI00219005                                     | 51,787.90 | 345 | 354 | ALELDSNNEK                 | K | G | 1,140.56 |
| 1408 | FKBP4 FK506-binding protein 4                                      | IPI00219005                                     | 51,787.90 | 345 | 354 | ALELDSNNEK                 | K | G | 1,140.56 |
| 1409 | STIP1 Stress-induced-phosphoprotein 1                              | IPI00013894,IPI00871856                         | 62,624.10 | 345 | 351 | ILKEQER                    | K | L | 923.5401 |
| 1410 | HNRNPR Heterogeneous nuclear ribonucleoprotein R                   | IPI00012074,IPI00644055,IPI00856037,IPI00910614 | 70,925.80 | 347 | 359 | NLATTVTEEILEK              | R | S | 1,468.80 |
| 1411 | HSPA8 Isoform 1 of Heat shock cognate 71 kDa protein               | IPI00003865                                     | 70,881.80 | 349 | 357 | LLQDFFNGK                  | K | E | 1,089.58 |
| 1412 | ACSL3 Long-chain-fatty-acid--CoA ligase 3                          | IPI00031397                                     | 80,405.10 | 349 | 363 | IGYSSPQTLDQSSK             | R | I | 1,589.79 |
| 1413 | PLS3 plastin 3                                                     | IPI00216694                                     | 70,795.90 | 351 | 364 | QFVTPADVVSIGNPK            | R | L | 1,466.77 |

|      |                                                                           |                                      |           |     |     |                        |   |   |          |
|------|---------------------------------------------------------------------------|--------------------------------------|-----------|-----|-----|------------------------|---|---|----------|
| 1414 | PLS3 plastin 3                                                            | IPI00216694                          | 70,795.90 | 351 | 364 | QFVTPADVVSIGNPK        | R | L | 1,466.77 |
| 1415 | STIP1 Stress-induced-phosphoprotein 1                                     | IPI00013894,IPI00871856              | 62,624.10 | 352 | 364 | LAYINPDLALEEK          | R | N | 1,496.81 |
| 1416 | (Bos taurus) similar to alpha-tubulin I isoform 1                         | CON_00700865,IPI00387144,IPI00792677 | 50,133.70 | 353 | 370 | VGINYQPPTVVPGGDLAK     | K | V | 1,833.00 |
| 1417 | PABPC1 Isoform 1 of Polyadenylate-binding protein 1                       | IPI00008524                          | 70,653.30 | 357 | 370 | IVATKPLYVALAQR         | R | K | 1,550.95 |
| 1418 | PABPC1 Isoform 1 of Polyadenylate-binding protein 1                       | IPI00008524                          | 70,653.30 | 357 | 370 | IVATKPLYVALAQR         | R | K | 1,550.95 |
| 1419 | RCC1 regulator of chromosome condensation 1 isoform a                     | IPI00001661,IPI00747309,IPI00787306  | 48,126.30 | 357 | 366 | LGLGEGAEK              | R | S | 1,010.52 |
| 1420 | GLUL Glutamine synthetase                                                 | IPI00010130                          | 42,046.90 | 358 | 373 | TCLLNETGDEPFQYKN       | R | - | 1,936.88 |
| 1421 | CCT7 T-complex protein 1 subunit eta                                      | IPI00018465                          | 59,349.80 | 358 | 366 | YNFFTGCPC              | R | A | 1,141.52 |
| 1422 | RRM2 Ribonucleoside-diphosphate reductase M2 subunit                      | IPI00011118                          | 51,076.50 | 359 | 371 | IEQEFLTEALPVK          | R | L | 1,524.84 |
| 1423 | TUBB Tubulin beta chain                                                   | IPI00011654                          | 49,652.60 | 363 | 379 | MAVTFIGNSTAIQELFK      | K | R | 1,893.99 |
| 1424 | TUBB2B Tubulin beta-2B chain                                              | IPI00031370                          | 49,935.10 | 363 | 379 | MSATFIGNSTAIQELFK      | K | R | 1,881.95 |
| 1425 | TUBB Tubulin beta chain                                                   | IPI00011654                          | 49,652.60 | 363 | 379 | MAVTFIGNSTAIQELFK      | K | R | 1,893.99 |
| 1426 | TUBB2C Tubulin beta-2C chain                                              | IPI00007752                          | 49,812.70 | 363 | 379 | MSATFIGNSTAIQELFK      | K | R | 1,881.95 |
| 1427 | RARS Isoform Complexed of Arginyl-tRNA synthetase, cytoplasmic            | IPI00004860                          | 75,364.00 | 363 | 377 | IVFVPGCSIPLTIVK        | K | S | 1,650.97 |
| 1428 | STIP1 Stress-induced-phosphoprotein 1                                     | IPI00013894,IPI00871856              | 62,624.10 | 365 | 373 | NKGNECFQK              | K | G | 1,140.54 |
| 1429 | PSMD6 26S proteasome non-ATPase regulatory subunit 6                      | IPI00014151,IPI00794383              | 45,515.40 | 372 | 379 | KGDLNLR                | K | V | 936.5718 |
| 1430 | RCC1 regulator of chromosome condensation 1 isoform a                     | IPI00001661,IPI00747309,IPI00787306  | 48,126.30 | 375 | 393 | LPVSSVACGASVGYAVTK     | R | D | 1,844.97 |
| 1431 | PSMD3 26S proteasome non-ATPase regulatory subunit 3                      | IPI00011603                          | 60,961.60 | 375 | 385 | FNQVLDQFGEK            | K | F | 1,332.67 |
| 1432 | PSMD3 26S proteasome non-ATPase regulatory subunit 3                      | IPI00011603                          | 60,961.60 | 375 | 385 | FNQVLDQFGEK            | K | F | 1,332.67 |
| 1433 | HSPA4 Heat shock 70 kDa protein 4                                         | IPI00002966                          | 94,313.90 | 375 | 388 | GCALQCAILSPAFK         | R | V | 1,543.79 |
| 1434 | G3BP1 Ras GTPase-activating protein-binding protein 1                     | IPI00012442                          | 52,144.80 | 377 | 393 | LPNFGFVVFDDSEPVQK      | K | V | 1,945.98 |
| 1435 | G3BP1 Ras GTPase-activating protein-binding protein 1                     | IPI00012442                          | 52,144.80 | 377 | 393 | LPNFGFVVFDDSEPVQK      | K | V | 1,945.98 |
| 1436 | RARS Isoform Complexed of Arginyl-tRNA synthetase, cytoplasmic            | IPI00004860                          | 75,364.00 | 378 | 393 | SDGGYTYDTSDLAAIK       | K | Q | 1,684.78 |
| 1437 | RUVBL1 Isoform 1 of RuvB-like 1                                           | IPI00021187                          | 50,211.40 | 379 | 400 | AQTEGINISEEALNHLGEIGTK | R | T | 2,332.19 |
| 1438 | STIP1 Stress-induced-phosphoprotein 1                                     | IPI00013894,IPI00871856              | 62,624.10 | 382 | 389 | HYTEAIKR               | K | N | 1,025.56 |
| 1439 | STIP1 Stress-induced-phosphoprotein 1                                     | IPI00013894,IPI00871856              | 62,624.10 | 382 | 389 | HYTEAIKR               | K | N | 1,025.56 |
| 1440 | STIP1 Stress-induced-phosphoprotein 1                                     | IPI00013894,IPI00871856              | 62,624.10 | 382 | 389 | HYTEAIKR               | K | N | 1,025.56 |
| 1441 | CMAS Isoform 1 of N-acetylneuraminatase                                   | IPI00303158                          | 48,361.60 | 384 | 399 | VGLSGAPADACSTAQK       | R | A | 1,540.75 |
| 1442 | GDI2 cDNA FLJ60299, highly similar to Rab GDP dissociation inhibitor beta | IPI00031461                          | 51,138.50 | 384 | 394 | FVSISDLLVPK            | K | D | 1,225.73 |
| 1443 | GDI2 cDNA FLJ60299, highly similar to Rab GDP dissociation inhibitor beta | IPI00031461                          | 51,138.50 | 384 | 394 | FVSISDLLVPK            | K | D | 1,225.73 |
| 1444 | GDI2 cDNA FLJ60299, highly similar to Rab GDP dissociation inhibitor beta | IPI00031461                          | 51,138.50 | 384 | 394 | FVSISDLLVPK            | K | D | 1,225.73 |
| 1445 | SSB Lupus La protein                                                      | IPI00009032,IPI00916802              | 46,821.00 | 385 | 397 | AREETDKEEPASK          | R | Q | 1,505.74 |
| 1446 | SSB Lupus La protein                                                      | IPI00009032,IPI00916802              | 46,821.00 | 385 | 397 | AREETDKEEPASK          | R | Q | 1,505.74 |
| 1447 | EEF1A1 Elongation factor 1-alpha 1                                        | IPI00396485,IPI00472724              | 50,123.20 | 386 | 392 | KLEDGPK                | K | F | 802.4642 |
| 1448 | PSAT1 cDNA FLJ56437, highly similar to Phosphoserine aminotransferase     | IPI00001734                          | 45,338.10 | 388 | 401 | ASLYNAVITIEDVQK        | R | L | 1,558.82 |
| 1449 | PSAT1 cDNA FLJ56437, highly similar to Phosphoserine aminotransferase     | IPI00001734                          | 45,338.10 | 388 | 401 | ASLYNAVITIEDVQK        | R | L | 1,558.82 |
| 1450 | (Bos taurus) similar to alpha-tubulin I isoform 1                         | CON_00700865,IPI00387144,IPI00792677 | 50,133.70 | 391 | 401 | LDHKFDLMYAK            | R | R | 1,396.73 |
| 1451 | TCP1 T-complex protein 1 subunit alpha                                    | IPI00290566                          | 60,327.20 | 391 | 401 | SLHDALCVVKR            | R | V | 1,305.72 |
| 1452 | HSP90AB1 Heat shock protein HSP 90-beta                                   | IPI00414676                          | 83,249.30 | 393 | 399 | EMLQQSK                | R | I | 887.4384 |
| 1453 | EEF1A1 Elongation factor 1-alpha 1                                        | IPI00396485,IPI00472724              | 50,123.20 | 396 | 423 | SGDAAIVDMVPGKPMCVESF   | K | F | 3,035.40 |
| 1454 | FSCN1 Fascin                                                              | IPI00163187,IPI00747810              | 54,512.30 | 399 | 408 | SDYPPLGR<br>KVTGTLDANR | R | S | 1,082.60 |

|      |                                                                                 |                                                             |            |     |     |                        |   |   |          |
|------|---------------------------------------------------------------------------------|-------------------------------------------------------------|------------|-----|-----|------------------------|---|---|----------|
| 1455 | HNRNPL Heterogeneous nuclear ribonucleoprotein L                                | IPI00027834                                                 | 64,114.80  | 399 | 411 | VFNVFLYGNVEK           | R | V | 1,596.80 |
| 1456 | BAT1 Isoform 2 of Spliceosome RNA helicase BAT1                                 | IPI00641829,IPI00792043,IPI00848161,IPI00893580             | 50,662.10  | 400 | 413 | GLAITFVSDENDAK         | K | I | 1,487.75 |
| 1457 | RUVBL1 Isoform 1 of RuvB-like 1                                                 | IPI00021187                                                 | 50,211.40  | 405 | 418 | YSVQLLTPANLLAK         | R | I | 1,538.90 |
| 1458 | HNRNPU Isoform Short of Heterogeneous nuclear ribonucleoprotein U               | IPI00479217,IPI00640106,IPI00644079,IPI00644224,IPI00883857 | 88,962.30  | 405 | 414 | NGQDLGVAFK             | K | I | 1,056.56 |
| 1459 | HSP90AA1 heat shock protein 90kDa alpha (cytosolic), class A member 1 isoform 1 | IPI00382470,IPI00784295                                     | 98,147.10  | 406 | 414 | YIDQEELNK              | K | T | 1,159.57 |
| 1460 | HSP90AA1 heat shock protein 90kDa alpha (cytosolic), class A member 1 isoform 1 | IPI00382470,IPI00784295                                     | 98,147.10  | 406 | 414 | YIDQEELNK              | K | T | 1,159.57 |
| 1461 | HSP90AA1 heat shock protein 90kDa alpha (cytosolic), class A member 1 isoform 1 | IPI00382470,IPI00784295                                     | 98,147.10  | 406 | 414 | YIDQEELNK              | K | T | 1,159.57 |
| 1462 | ENO1 Isoform alpha-enolase of Alpha-enolase                                     | IPI00465248                                                 | 47,152.20  | 413 | 420 | IEEELGSK               | R | A | 912.4765 |
| 1463 | ENO1 Isoform alpha-enolase of Alpha-enolase                                     | IPI00465248                                                 | 47,152.20  | 413 | 420 | IEEELGSK               | R | A | 912.4765 |
| 1464 | SFPQ Isoform Long of Splicing factor, proline- and glutamine-rich               | IPI00010740                                                 | 76,131.50  | 414 | 425 | GIVEFASKPAAR           | K | K | 1,253.71 |
| 1465 | EEF2 Elongation factor 2                                                        | IPI00186290                                                 | 95,322.10  | 416 | 426 | VFSGLVSTGLK            | R | V | 1,115.66 |
| 1466 | EEF2 Elongation factor 2                                                        | IPI00186290                                                 | 95,322.10  | 416 | 426 | VFSGLVSTGLK            | R | V | 1,115.66 |
| 1467 | FKBP4 FK506-binding protein 4                                                   | IPI00219005                                                 | 51,787.90  | 418 | 426 | LAEEENKAK              | R | A | 1,047.57 |
| 1468 | HSP90AA1 heat shock protein 90kDa alpha (cytosolic), class A member 1 isoform 1 | IPI00382470,IPI00784295                                     | 98,147.10  | 422 | 436 | NPDDITNEEYGEFYK        | R | S | 1,841.80 |
| 1469 | HSP90AA1 heat shock protein 90kDa alpha (cytosolic), class A member 1 isoform 1 | IPI00382470,IPI00784295                                     | 98,147.10  | 422 | 436 | NPDDITNEEYGEFYK        | R | S | 1,841.80 |
| 1470 | HSP90AA1 heat shock protein 90kDa alpha (cytosolic), class A member 1 isoform 1 | IPI00382470,IPI00784295                                     | 98,147.10  | 422 | 436 | NPDDITNEEYGEFYK        | R | S | 1,841.80 |
| 1471 | PSMD3 26S proteasome non-ATPase regulatory subunit 3                            | IPI00011603                                                 | 60,961.60  | 426 | 440 | LQLDSPEDAEIFIAK        | K | A | 1,682.87 |
| 1472 | PSMD3 26S proteasome non-ATPase regulatory subunit 3                            | IPI00011603                                                 | 60,961.60  | 426 | 440 | LQLDSPEDAEIFIAK        | K | A | 1,682.87 |
| 1473 | ATIC Bifunctional purine biosynthesis protein PURH                              | IPI00289499                                                 | 64,598.50  | 427 | 437 | YTQNSVCYAK             | K | N | 1,328.60 |
| 1474 | EEF1A1 Elongation factor 1-alpha 1                                              | IPI00396485,IPI00472724                                     | 50,123.20  | 431 | 439 | QTVAVGVIIK             | R | A | 922.5812 |
| 1475 | EEF1A1 Elongation factor 1-alpha 1                                              | IPI00396485,IPI00472724                                     | 50,123.20  | 431 | 439 | QTVAVGVIIK             | R | A | 922.5812 |
| 1476 | EEF1A2 Elongation factor 1-alpha 2                                              | IPI00014424                                                 | 50,452.60  | 431 | 439 | QTVAVGVIIK             | R | N | 922.5812 |
| 1477 | PLS3 plastin 3                                                                  | IPI00216694                                                 | 70,795.90  | 436 | 444 | IKVPVDWSK              | R | V | 1,087.65 |
| 1478 | HSP90AA1 heat shock protein 90kDa alpha (cytosolic), class A member 1 isoform 1 | IPI00382470,IPI00784295                                     | 98,147.10  | 437 | 449 | SLTNDWEDHLAVK          | K | H | 1,535.76 |
| 1479 | HSP90AA1 heat shock protein 90kDa alpha (cytosolic), class A member 1 isoform 1 | IPI00382470,IPI00784295                                     | 98,147.10  | 437 | 449 | SLTNDWEDHLAVK          | K | H | 1,535.76 |
| 1480 | ATP2A2 Isoform SERCA2A of Sarcoplasmic/endoplasmic reticulum calcium ATPase 2   | IPI00177817,IPI00219078,IPI00747443                         | 109,674.90 | 437 | 451 | VGEATETALTCLVEK        | K | M | 1,628.83 |
| 1481 | ATP2A2 Isoform SERCA2A of Sarcoplasmic/endoplasmic reticulum calcium ATPase 2   | IPI00177817,IPI00219078,IPI00747443                         | 109,674.90 | 437 | 451 | VGEATETALTCLVEK        | K | M | 1,628.83 |
| 1482 | ACTN4 Alpha-actinin-4                                                           | IPI00013808                                                 | 104,839.20 | 438 | 450 | HRDYETATLSDIK          | K | A | 1,556.78 |
| 1483 | TCP1 T-complex protein 1 subunit alpha                                          | IPI00290566                                                 | 60,327.20  | 444 | 466 | LLLVIPNTLAVNAAQDSTDLVA | R | L | 2,361.31 |
| 1484 | ATP1A1 Isoform Long of Sodium/potassium-transporting ATPase subunit alpha-1     | IPI00006482,IPI00646182                                     | 112,881.50 | 446 | 458 | AVAGDASESALLK          | R | C | 1,239.67 |
| 1485 | TKT cDNA FLJ54957, highly similar to Transketolase                              | IPI00643920                                                 | 68,725.40  | 447 | 464 | SVPTSTVFYPSDGVATEK     | R | A | 1,892.94 |
| 1486 | TKT cDNA FLJ54957, highly similar to Transketolase                              | IPI00643920                                                 | 68,725.40  | 447 | 464 | SVPTSTVFYPSDGVATEK     | R | A | 1,892.94 |
| 1487 | TKT cDNA FLJ54957, highly similar to Transketolase                              | IPI00643920                                                 | 68,725.40  | 447 | 464 | SVPTSTVFYPSDGVATEK     | R | A | 1,892.94 |
| 1488 | IGF2BP1 Insulin-like growth factor 2 mRNA-binding protein 1                     | IPI00008557                                                 | 63,438.30  | 453 | 465 | MVIITGPPEAQFK          | R | A | 1,454.78 |
| 1489 | STIP1 Stress-induced-phosphoprotein 1                                           | IPI00013894,IPI00871856                                     | 62,624.10  | 454 | 470 | ALDLDSCKEADGYQR        | K | C | 1,906.87 |
| 1490 | TKT cDNA FLJ54957, highly similar to Transketolase                              | IPI00643920                                                 | 68,725.40  | 465 | 473 | AVELAANTK              | K | G | 924.524  |
| 1491 | STIP1 Stress-induced-phosphoprotein 1                                           | IPI00013894,IPI00871856                                     | 62,624.10  | 479 | 486 | HDSPEDVK               | R | R | 934.4357 |

|      |                                                                                    |                                                                         |            |     |     |                        |   |          |
|------|------------------------------------------------------------------------------------|-------------------------------------------------------------------------|------------|-----|-----|------------------------|---|----------|
| 1492 | TKT cDNA FLJ54957, highly similar to<br>Transketolase                              | IPI00643920                                                             | 68,725.40  | 480 | 501 | TSRPENAIYNNNEDFQVGQA R | V | 2,516.23 |
| 1493 | TKT cDNA FLJ54957, highly similar to<br>Transketolase                              | IPI00643920                                                             | 68,725.40  | 480 | 501 | TSRPENAIYNNNEDFQVGQA R | V | 2,516.23 |
| 1494 | HSP90AB1 Heat shock protein HSP 90-beta                                            | IPI00414676                                                             | 83,249.30  | 482 | 491 | SIYYITGESK K           | E | 1,168.60 |
| 1495 | HSP90AB1 Heat shock protein HSP 90-beta                                            | IPI00414676                                                             | 83,249.30  | 482 | 502 | SIYYITGESKEQVANSFVER K | V | 2,399.20 |
| 1496 | GARS Glycyl-tRNA synthetase                                                        | IPI00783097,IPI00915808                                                 | 83,123.50  | 491 | 501 | TVNVVQFEPK K           | G | 1,255.68 |
| 1497 | GARS Glycyl-tRNA synthetase                                                        | IPI00783097,IPI00915808                                                 | 83,123.50  | 491 | 501 | TVNVVQFEPK K           | G | 1,255.68 |
| 1498 | SLC1A5 Neutral amino acid transporter B(0)                                         | IPI00019472                                                             | 56,581.80  | 493 | 502 | STEPELIQVK R           | S | 1,151.64 |
| 1499 | ACSL3 Long-chain-fatty-acid--CoA ligase 3                                          | IPI00031397                                                             | 80,405.10  | 497 | 507 | VGAPLVCCEIK R          | L | 1,253.65 |
| 1500 | ACSL3 Long-chain-fatty-acid--CoA ligase 3                                          | IPI00031397                                                             | 80,405.10  | 497 | 507 | VGAPLVCCEIK R          | L | 1,253.65 |
| 1501 | YARS Tyrosyl-tRNA synthetase, cytoplasmic                                          | IPI00007074                                                             | 59,127.10  | 497 | 506 | ISEECIAQWK K           | Q | 1,271.62 |
| 1502 | HSPA8 Isoform 1 of Heat shock cognate 71 kDa<br>protein                            | IPI00003865                                                             | 70,881.80  | 501 | 509 | ITITNDKGR K            | L | 1,025.58 |
| 1503 | HSPA1A;HSPA1B Heat shock 70 kDa protein 1                                          | IPI00304925                                                             | 70,036.00  | 501 | 509 | ITITNDKGR K            | L | 1,025.58 |
| 1504 | HSPA8 Isoform 1 of Heat shock cognate 71 kDa<br>protein                            | IPI00003865                                                             | 70,881.80  | 501 | 509 | ITITNDKGR K            | L | 1,025.58 |
| 1505 | HSPA1A;HSPA1B Heat shock 70 kDa protein 1                                          | IPI00304925                                                             | 70,036.00  | 501 | 509 | ITITNDKGR K            | L | 1,025.58 |
| 1506 | SLC1A5 Neutral amino acid transporter B(0)                                         | IPI00019472                                                             | 56,581.80  | 503 | 522 | SELPLDPLPVPTEEGNPLLK K | H | 2,166.18 |
| 1507 | SLC1A5 Neutral amino acid transporter B(0)                                         | IPI00019472                                                             | 56,581.80  | 503 | 522 | SELPLDPLPVPTEEGNPLLK K | H | 2,166.18 |
| 1508 | PLS3 plastin 3                                                                     | IPI00216694                                                             | 70,795.90  | 505 | 518 | YTLNVLEDLGDGQK R       | A | 1,572.80 |
| 1509 | PLS3 plastin 3                                                                     | IPI00216694                                                             | 70,795.90  | 505 | 518 | YTLNVLEDLGDGQK R       | A | 1,572.80 |
| 1510 | TARS Threonyl-tRNA synthetase, cytoplasmic                                         | IPI00329633,IPI00908949                                                 | 83,419.80  | 505 | 517 | FLGDIEVWDQAEK K        | Q | 1,557.77 |
| 1511 | HSPA8 Isoform 1 of Heat shock cognate 71 kDa<br>protein                            | IPI00003865                                                             | 70,881.80  | 510 | 517 | LSKEDIER R             | M | 997.5405 |
| 1512 | HSPA8 Isoform 1 of Heat shock cognate 71 kDa<br>protein                            | IPI00003865                                                             | 70,881.80  | 510 | 517 | LSKEDIER R             | M | 997.5405 |
| 1513 | RARS Isoform Complexed of Arginyl-tRNA<br>synthetase, cytoplasmic                  | IPI00004860                                                             | 75,364.00  | 513 | 522 | LNDYIFSFDK R           | M | 1,269.62 |
| 1514 | SLC1A5 Neutral amino acid transporter B(0)                                         | IPI00019472                                                             | 56,581.80  | 523 | 541 | HYRGPAGDATVASEKESVM K  | - | 2,028.95 |
| 1515 | HSP90AA1 heat shock protein 90kDa alpha<br>(cytosolic), class A member 1 isoform 1 | IPI00382470,IPI00784295                                                 | 98,147.10  | 523 | 529 | EMLQQSK R              | I | 887.4384 |
| 1516 | SLC1A5 Neutral amino acid transporter B(0)                                         | IPI00019472                                                             | 56,581.80  | 526 | 541 | GPAGDATVASEKESVM R     | - | 1,572.73 |
| 1517 | SLC1A5 Neutral amino acid transporter B(0)                                         | IPI00019472                                                             | 56,581.80  | 526 | 541 | GPAGDATVASEKESVM R     | - | 1,572.73 |
| 1518 | IGF2BP1 Insulin-like growth factor 2 mRNA-binding<br>protein 1                     | IPI00008557                                                             | 63,438.30  | 526 | 538 | DQTPDENDQVIVK R        | I | 1,508.73 |
| 1519 | XRCC5 ATP-dependent DNA helicase 2 subunit 2                                       | IPI00220834,IPI00871391                                                 | 82,689.10  | 526 | 532 | SQIPLSK K              | I | 780.4706 |
| 1520 | KPNB1 Importin subunit beta-1                                                      | IPI00001639                                                             | 97,153.30  | 526 | 537 | SSAYESLMIEVK R         | N | 1,364.69 |
| 1521 | JUP Junction plakoglobin                                                           | IPI00554711                                                             | 81,727.90  | 527 | 533 | LVQLLVK R              | A | 820.5747 |
| 1522 | PLS3 plastin 3                                                                     | IPI00216694                                                             | 70,795.90  | 538 | 547 | STSIQSFKDK K           | T | 1,156.62 |
| 1523 | HSPA8 Isoform 1 of Heat shock cognate 71 kDa<br>protein                            | IPI00003865                                                             | 70,881.80  | 540 | 550 | NSLESYAFNMK K          | A | 1,327.61 |
| 1524 | HSPA8 Isoform 1 of Heat shock cognate 71 kDa<br>protein                            | IPI00003865                                                             | 70,881.80  | 540 | 550 | NSLESYAFNMK K          | A | 1,311.61 |
| 1525 | HSPA1A;HSPA1B Heat shock 70 kDa protein 1                                          | IPI00304925                                                             | 70,036.00  | 540 | 550 | NALESYAFNMK K          | S | 1,311.61 |
| 1526 | HNRNPL Heterogeneous nuclear ribonucleoprotein<br>L                                | IPI00027834                                                             | 64,114.80  | 542 | 552 | SSSGLLEWESK R          | S | 1,230.61 |
| 1527 | EEF2 Elongation factor 2                                                           | IPI00186290                                                             | 95,322.10  | 581 | 594 | ETVSEESNVLCLSK R       | S | 1,602.78 |
| 1528 | EEF2 Elongation factor 2                                                           | IPI00186290                                                             | 95,322.10  | 581 | 594 | ETVSEESNVLCLSK R       | S | 1,602.78 |
| 1529 | ILF3 Isoform 5 of Interleukin enhancer-binding<br>factor 3                         | IPI00219330,IPI00298788,IPI00298789,IPI00414335,IPI00418313,IPI00556173 | 74,589.90  | 588 | 600 | LFPDTPALDANK K         | K | 1,422.77 |
| 1530 | MCM6 DNA replication licensing factor MCM6                                         | IPI00031517                                                             | 92,872.60  | 589 | 599 | ESEDFIVEQYK K          | H | 1,394.66 |
| 1531 | GARS Glycyl-tRNA synthetase                                                        | IPI00783097,IPI00915808                                                 | 83,123.50  | 603 | 615 | TFFSFPVAVPFK R         | C | 1,465.80 |
| 1532 | TKT cDNA FLJ54957, highly similar to<br>Transketolase                              | IPI00643920                                                             | 68,725.40  | 603 | 611 | SGKPAELLK R            | M | 958.5904 |
| 1533 | TKT cDNA FLJ54957, highly similar to<br>Transketolase                              | IPI00643920                                                             | 68,725.40  | 603 | 611 | SGKPAELLK R            | M | 958.5904 |
| 1534 | TARS Threonyl-tRNA synthetase, cytoplasmic                                         | IPI00329633,IPI00908949                                                 | 83,419.80  | 620 | 636 | QVMVVPVGPTCDEYAQK R    | V | 1,944.93 |
| 1535 | AARS Alanyl-tRNA synthetase, cytoplasmic                                           | IPI00027442,IPI00910701                                                 | 106,795.20 | 665 | 677 | AVYTQDCPLAAK K         | A | 1,415.71 |

|             |                                            |                                     |            |     |     |              |   |   |          |
|-------------|--------------------------------------------|-------------------------------------|------------|-----|-----|--------------|---|---|----------|
| <b>1536</b> | TNPO1 transportin 1 isoform 1              | IPI00024364,IPI00419856,IPI00843876 | 102,340.80 | 693 | 704 | QSSFALLGDLTK | R | A | 1,287.70 |
| <b>1537</b> | MCM6 DNA replication licensing factor MCM6 | IPI00031517                         | 92,872.60  | 733 | 745 | KVEEEEDSALKR | R | S | 1,577.80 |
| <b>1538</b> | IPO7 Importin-7                            | IPI00007402                         | 119,501.50 | 741 | 750 | LLEVILQCK    | K | G | 1,236.75 |



**Supplemental Dataset Table 4. Unmodified Peptides Identified Following An1-labeling and DIBAC-S-S-Biotin Enrichment**

|                                                 |
|-------------------------------------------------|
| Legend:                                         |
| N-terminal Peptide (amino acid start index = 1) |
| N-terminal Peptide (amino acid start index = 2) |
| Internal Peptide                                |
| C-terminal Peptide                              |

|    | Protein name                                                                                                  | Protein accession numbers                                                                                                                                                                                                                                               | Protein molecular weight (Da) | Peptide start index | Peptide stop index | Peptide sequence     | Previous amino acid | Next amino acid | Calculated +1H peptide mass (AMU) |
|----|---------------------------------------------------------------------------------------------------------------|-------------------------------------------------------------------------------------------------------------------------------------------------------------------------------------------------------------------------------------------------------------------------|-------------------------------|---------------------|--------------------|----------------------|---------------------|-----------------|-----------------------------------|
| 1  | TUBB Tubulin beta chain                                                                                       | IPI00011654                                                                                                                                                                                                                                                             | 49,652.60                     | 1                   | 19                 | MREIVHIQAGQCGNQIGAK  | -                   | F               | 2,126.06                          |
| 2  | TUBB2A Tubulin beta-2A chain                                                                                  | IPI00013475,IPI00031370                                                                                                                                                                                                                                                 | 49,889.10                     | 1                   | 19                 | MREIVHIQAGQCGNQIGAK  | -                   | F               | 2,126.06                          |
| 3  | TUBB2C Tubulin beta-2C chain                                                                                  | IPI00007752                                                                                                                                                                                                                                                             | 49,812.70                     | 1                   | 19                 | MREIVHLQAGQCGNQIGAK  | -                   | F               | 2,126.06                          |
| 4  | RAB1B Ras-related protein Rab-1B                                                                              | IPI00008964,IPI00896425                                                                                                                                                                                                                                                 | 22,154.00                     | 1                   | 10                 | MNPEYDYLFK           | -                   | L               | 1,377.60                          |
| 5  | UBB;RPS27A;UBC ubiquitin and ribosomal protein S27a precursor                                                 | IPI00179330,IPI00456429,IPI00719280,IPI00743241,IPI00743650,IPI00744274,IPI00784990,IPI00789107,IPI00789823,IPI00790633,IPI00792712,IPI00793330,IPI00793729,IPI00793810,IPI00794211,IPI00794925,IPI00795527,IPI00796007,IPI00796600,IPI00797400,IPI00798127,IPI00798155 | 17,947.60                     | 1                   | 6                  | MQIFVK               | -                   | T               | 765.4328                          |
| 6  | UBB;RPS27A;UBC ubiquitin and ribosomal protein S27a precursor                                                 | IPI00179330,IPI00456429,IPI00719280,IPI00743241,IPI00743650,IPI00744274,IPI00784990,IPI00789107,IPI00789823,IPI00790633,IPI00792712,IPI00793330,IPI00793729,IPI00793810,IPI00794211,IPI00794925,IPI00795527,IPI00796007,IPI00796600,IPI00797400,IPI00798127,IPI00798155 | 17,947.60                     | 1                   | 6                  | MQIFVK               | -                   | T               | 765.4328                          |
| 7  | UBB;RPS27A;UBC ubiquitin and ribosomal protein S27a precursor                                                 | IPI00179330,IPI00456429,IPI00719280,IPI00743241,IPI00743650,IPI00744274,IPI00784990,IPI00789107,IPI00789823,IPI00790633,IPI00792712,IPI00793330,IPI00793729,IPI00793810,IPI00794211,IPI00794925,IPI00795527,IPI00796007,IPI00796600,IPI00797400,IPI00798127,IPI00798155 | 17,947.60                     | 1                   | 6                  | MQIFVK               | -                   | T               | 765.4328                          |
| 8  | PSMD11 Proteasome 26S non-ATPase subunit 11 variant (Fragment)                                                | IPI00105598                                                                                                                                                                                                                                                             | 47,519.40                     | 2                   | 11                 | AAAAVVEFQR           | M                   | A               | 1,103.58                          |
| 9  | PFKL Isoform 1 of 6-phosphofructokinase, liver type                                                           | IPI00332371,IPI00902982                                                                                                                                                                                                                                                 | 85,001.20                     | 2                   | 10                 | AAVDLEKLR            | M                   | A               | 1,056.60                          |
| 10 | CLIC1 Chloride intracellular channel protein 1                                                                | IPI00010896                                                                                                                                                                                                                                                             | 26,905.30                     | 2                   | 13                 | AEEQPQVELFVK         | M                   | A               | 1,458.75                          |
| 11 | EEF2 Elongation factor 2                                                                                      | IPI00186290                                                                                                                                                                                                                                                             | 95,322.10                     | 2                   | 10                 | VNFTVDQIR            | M                   | A               | 1,091.58                          |
| 12 | EEF2 Elongation factor 2                                                                                      | IPI00186290                                                                                                                                                                                                                                                             | 95,322.10                     | 2                   | 10                 | VNFTVDQIR            | M                   | A               | 1,091.58                          |
| 13 | EEF2 Elongation factor 2                                                                                      | IPI00186290                                                                                                                                                                                                                                                             | 95,322.10                     | 2                   | 10                 | VNFTVDQIR            | M                   | A               | 1,091.58                          |
| 14 | RUVBL2 RuvB-like 2                                                                                            | IPI00009104                                                                                                                                                                                                                                                             | 51,140.10                     | 2                   | 14                 | ATVTATTKVPEIR        | M                   | D               | 1,428.81                          |
| 15 | SLC25A5 ADP/ATP translocase 2                                                                                 | IPI00007188                                                                                                                                                                                                                                                             | 32,878.50                     | 2                   | 10                 | TDAAVSFAK            | M                   | D               | 951.4782                          |
| 16 | SNRPA1 U2 small nuclear ribonucleoprotein A'                                                                  | IPI00297477                                                                                                                                                                                                                                                             | 28,399.10                     | 2                   | 20                 | VKLTAELIEQAAQYTNVAVR | M                   | D               | 2,118.16                          |
| 17 | CALM1;CALM3;CALM2 Calmodulin                                                                                  | IPI00075248,IPI00386621,IPI00794543,IPI00916768                                                                                                                                                                                                                         | 16,820.00                     | 2                   | 14                 | ADQLTEEQIAEFK        | M                   | E               | 1,563.75                          |
| 18 | TAGLN2 Transgelin-2                                                                                           | IPI00550363                                                                                                                                                                                                                                                             | 22,373.90                     | 2                   | 12                 | ANRGPAYGLSR          | M                   | E               | 1,203.62                          |
| 19 | RPL11 Isoform 1 of 60S ribosomal protein L11                                                                  | IPI00376798                                                                                                                                                                                                                                                             | 20,235.20                     | 2                   | 13                 | AQDQGEKENPMR         | M                   | E               | 1,444.65                          |
| 20 | STMN1 Stathmin                                                                                                | IPI00479997                                                                                                                                                                                                                                                             | 17,285.00                     | 2                   | 9                  | ASSDIQVK             | M                   | E               | 889.4626                          |
| 21 | CAMK2D Isoform Delta 6 of Calcium/calmodulin-dependent protein kinase type II delta chain RPSA 33 kDa protein | IPI00172636,IPI00430291,IPI00827573,IPI00827625,IPI00876923                                                                                                                                                                                                             | 54,111.10                     | 2                   | 9                  | ASTTTCTR             | M                   | F               | 939.4201                          |
| 22 | MAPK1 Mitogen-activated protein kinase 1                                                                      | IPI00413108,IPI00553164,IPI00793137,IPI00847766                                                                                                                                                                                                                         | 33,295.50                     | 2                   | 17                 | SGALDVLQMKEEDVLK     | M                   | F               | 1,816.94                          |
| 23 | MAPK1 Mitogen-activated protein kinase 1                                                                      | IPI00003479                                                                                                                                                                                                                                                             | 41,373.90                     | 2                   | 15                 | AAAAAAGAGPEMVR       | M                   | G               | 1,300.63                          |
| 24 | AK2 Isoform 1 of Adenylate kinase isoenzyme 2, mitochondrial                                                  | IPI00215901                                                                                                                                                                                                                                                             | 26,461.00                     | 2                   | 14                 | APSVPAAEPEYPK        | M                   | G               | 1,355.68                          |
| 25 | GSTP1 Glutathione S-transferase P                                                                             | IPI00219757                                                                                                                                                                                                                                                             | 23,338.70                     | 2                   | 12                 | PPYTVVYFPVR          | M                   | G               | 1,337.73                          |
| 26 | DDX3X ATP-dependent RNA helicase DDX3X                                                                        | IPI00215637                                                                                                                                                                                                                                                             | 73,227.70                     | 2                   | 35                 | SHVAVENALGLDQQFAGLDL | M                   | G               | 3,459.63                          |
| 27 | MAPRE1 Microtubule-associated protein RP/EB family member 1                                                   | IPI00017596,IPI00910350                                                                                                                                                                                                                                                 | 29,981.50                     | 2                   | 17                 | NSSDNQSGGSTASK       | M                   | H               | 1,754.86                          |
| 28 | ABCE1 ATP-binding cassette sub-family E member 1                                                              | IPI00303207                                                                                                                                                                                                                                                             | 67,298.40                     | 2                   | 7                  | ADKLTR               | M                   | I               | 745.4204                          |
| 29 | CAPZA2 F-actin-capping protein subunit alpha-2                                                                | IPI00026182                                                                                                                                                                                                                                                             | 32,931.20                     | 2                   | 15                 | ADLEEQLSDEEKVR       | M                   | I               | 1,702.81                          |
| 30 | APRT Adenine phosphoribosyltransferase                                                                        | IPI00218693,IPI00642457                                                                                                                                                                                                                                                 | 19,590.50                     | 2                   | 12                 | ADSELQLVEQR          | M                   | I               | 1,329.66                          |
| 31 | UBE2K Isoform 1 of Ubiquitin-conjugating enzyme E2 K                                                          | IPI00021370,IPI00910176                                                                                                                                                                                                                                                 | 22,389.10                     | 2                   | 8                  | ANIAVQR              | M                   | I               | 813.4577                          |



|    |                                                                                                                      |                                                 |           |   |    |                                                    |   |   |          |
|----|----------------------------------------------------------------------------------------------------------------------|-------------------------------------------------|-----------|---|----|----------------------------------------------------|---|---|----------|
| 32 | DSTN Destrin                                                                                                         | IPI00473014                                     | 18,488.20 | 2 | 13 | ASGVQVADEVCR                                       | M | I | 1,332.62 |
| 33 | EEF1D Elongation factor 1-delta                                                                                      | IPI00023048                                     | 31,103.90 | 2 | 10 | ATNFLAHEK                                          | M | I | 1,072.54 |
| 34 | EEF1D Elongation factor 1-delta                                                                                      | IPI00023048                                     | 31,103.90 | 2 | 10 | ATNFLAHEK                                          | M | I | 1,072.54 |
| 35 | PRDX6 Peroxiredoxin-6                                                                                                | IPI00220301                                     | 25,018.10 | 2 | 22 | PGGLLLDVAPNFEANTTVG                                | M | I | 2,098.09 |
| 36 | PRDX6 Peroxiredoxin-6                                                                                                | IPI00220301                                     | 25,018.10 | 2 | 22 | PGGLLLDVAPNFEANTTVG                                | M | I | 2,098.09 |
| 37 | EIF5A Isoform 1 of Eukaryotic translation initiation factor 5A-1                                                     | IPI00411704,IPI00855924                         | 16,814.70 | 2 | 26 | ADDLDFETGDAGASATFPMQ                               | M | K | 2,704.15 |
| 38 | EIF4A3 Eukaryotic initiation factor 4A-III                                                                           | IPI00009328                                     | 46,854.40 | 2 | 14 | ATTATMATSGSAR                                      | M | K | 1,267.59 |
| 39 | ALDOA Fructose-bisphosphate aldolase A                                                                               | IPI00465439                                     | 39,402.60 | 2 | 13 | PYQYPALTPPEQK                                      | M | K | 1,434.73 |
| 40 | HIST1H1C Histone H1.2                                                                                                | IPI00217465                                     | 21,347.80 | 2 | 21 | SETAPAAPAAAPPAEKAPVK                               | M | K | 1,916.01 |
| 41 | RAN GTP-binding nuclear protein Ran                                                                                  | IPI00643041,IPI00795671                         | 24,405.10 | 2 | 12 | AAQGEPPVQFK                                        | M | L | 1,244.63 |
| 42 | KARS Lysyl-tRNA synthetase                                                                                           | IPI00014238                                     | 68,032.40 | 2 | 17 | AAVQAAEVKVDGSEPK                                   | M | L | 1,640.85 |
| 43 | PAICS phosphoribosylaminoimidazole carboxylase, phosphoribosylaminoimidazole succinocarboxamide synthetase isoform 1 | IPI00815732                                     | 47,941.00 | 2 | 12 | ATAEVLNIGKK                                        | M | L | 1,185.68 |
| 44 | CKB Creatine kinase B-type                                                                                           | IPI00022977                                     | 42,627.10 | 2 | 11 | PFSNSHNALK                                         | M | L | 1,114.56 |
| 45 | TOP1 DNA topoisomerase 1                                                                                             | IPI00413611                                     | 90,711.70 | 2 | 17 | SGDHLHNDSQIEADFR                                   | M | L | 1,882.83 |
| 46 | KPNA2;LOC728860 Importin subunit alpha-2                                                                             | IPI00002214,IPI00789457                         | 57,844.50 | 2 | 13 | STNENANTPAAR                                       | M | L | 1,287.59 |
| 47 | ANXA2P2 Putative annexin A2-like protein                                                                             | IPI00334627,IPI00455315                         | 38,642.90 | 2 | 10 | STVHEILCK                                          | M | L | 1,128.57 |
| 48 | RPS5 40S ribosomal protein S5                                                                                        | IPI00008433                                     | 22,859.00 | 2 | 18 | TEWETAAPAVAETPDIK                                  | M | L | 1,870.91 |
| 49 | AKR1A1 Alcohol dehydrogenase [NADP+]                                                                                 | IPI00220271                                     | 36,555.60 | 2 | 13 | AASCVLLHTGQK                                       | M | M | 1,326.68 |
| 50 | UBE2V1 Isoform 3 of Ubiquitin-conjugating enzyme E2 variant 1                                                        | IPI00472498,IPI00514724                         | 16,477.10 | 2 | 13 | AATTGSGVKVPR                                       | M | N | 1,185.66 |
| 51 | RPL4 60S ribosomal protein L4                                                                                        | IPI00003918,IPI00795303                         | 47,681.10 | 2 | 20 | ACARPLISVYSEKGESSGK                                | M | N | 2,081.03 |
| 52 | EIF5A Isoform 1 of Eukaryotic translation initiation factor 5A-1                                                     | IPI00411704,IPI00855924                         | 16,814.70 | 2 | 27 | ADDLDFETGDAGASATFPMQ                               | M | N | 2,816.25 |
| 53 | SEPT11 Septin-11                                                                                                     | IPI00019376                                     | 49,381.10 | 2 | 14 | AVAVGRPSNEELR                                      | M | N | 1,439.76 |
| 54 | EIF2S3 Eukaryotic translation initiation factor 2 subunit 3                                                          | IPI00297982                                     | 51,092.20 | 2 | 17 | AGGEAGVTLGQPPLSR                                   | M | Q | 1,591.82 |
| 55 | VCP Transitional endoplasmic reticulum ATPase                                                                        | IPI00022774                                     | 89,306.80 | 2 | 18 | ASGADSKGDDLSTAILK                                  | M | Q | 1,690.85 |
| 56 | CAPZB Isoform 2 of F-actin-capping protein subunit beta                                                              | IPI00642256                                     | 30,611.70 | 2 | 14 | SDQQLDLALDLMR                                      | M | R | 1,622.72 |
| 57 | TRIM28 Isoform 1 of Transcription intermediary factor 1-beta                                                         | IPI00438229,IPI00438230                         | 88,531.00 | 2 | 32 | AASAAAASAAAASAAAGSPG                               | M | S | 2,585.22 |
| 58 | ARHGDI2 Rho GDP-dissociation inhibitor 1                                                                             | IPI00003815,IPI00793767,IPI00794402,IPI00796541 | 23,189.50 | 2 | 33 | PGEGSAGGEKR<br>AEQEPTAEQLAQIAAENEDE<br>HSVNYKPPAQK | M | S | 3,606.68 |
| 59 | CCT4 T-complex protein 1 subunit delta                                                                               | IPI00302927,IPI00873222                         | 57,907.90 | 2 | 8  | PENVAPR                                            | M | S | 782.4155 |
| 60 | RBBP4 Histone-binding protein RBBP4                                                                                  | IPI00328319,IPI00645329                         | 47,637.80 | 2 | 15 | ADKEAAFDDAVEER                                     | M | V | 1,607.72 |
| 61 | CACYBP Isoform 1 of Calcyclin-binding protein                                                                        | IPI00395627                                     | 26,192.30 | 2 | 14 | ASEELQKDLLEEVK                                     | M | V | 1,559.78 |
| 62 | CFL1 Cofilin-1                                                                                                       | IPI00012011                                     | 18,485.10 | 2 | 13 | ASGVAVSDGVIK                                       | M | V | 1,144.62 |
| 63 | CFL1 Cofilin-1                                                                                                       | IPI00012011                                     | 18,485.10 | 2 | 13 | ASGVAVSDGVIK                                       | M | V | 1,144.62 |
| 64 | RAB11B Ras-related protein Rab-11B                                                                                   | IPI00020436                                     | 24,471.00 | 2 | 13 | GTRDDEYDYLFK                                       | M | V | 1,563.70 |
| 65 | AHCY Adenosylhomocysteinase                                                                                          | IPI00012007                                     | 47,699.10 | 2 | 8  | SDKLPYK                                            | M | V | 892.4776 |
| 66 | HSPA8 Isoform 1 of Heat shock cognate 71 kDa protein                                                                 | IPI00003865                                     | 70,881.80 | 2 | 25 | SKGPAVGIDLGTTYSCVGVFQ                              | M | V | 2,520.26 |
| 67 | SARS Seryl-tRNA synthetase, cytoplasmic                                                                              | IPI00220637,IPI00514587                         | 58,760.60 | 2 | 9  | VLDLDFR                                            | M | V | 990.562  |
| 68 | SEC22B Vesicle-trafficking protein SEC22b                                                                            | IPI00006865                                     | 24,723.40 | 2 | 9  | VLLTMIAR                                           | M | V | 932.5599 |
| 69 | TOMM70A Mitochondrial import receptor subunit TOM70                                                                  | IPI00015602                                     | 67,439.20 | 2 | 38 | AASKPVEAAVVAAPVSSGS<br>GVGGGGTAGPGTGGLPR           | M | W | 3,159.64 |
| 70 | MAGOHB Protein mago nashi homolog 2                                                                                  | IPI00059292                                     | 17,258.60 | 2 | 10 | AVASDFYLR                                          | M | Y | 1,083.55 |
| 71 | TUBB Tubulin beta chain                                                                                              | IPI00011654                                     | 49,652.60 | 3 | 19 | EIVHIQAGQCGNQIGAK                                  | R | F | 1,822.92 |
| 72 | TUBB Tubulin beta chain                                                                                              | IPI00011654                                     | 49,652.60 | 3 | 19 | EIVHIQAGQCGNQIGAK                                  | R | F | 1,822.92 |
| 73 | TUBB Tubulin beta chain                                                                                              | IPI00011654                                     | 49,652.60 | 3 | 19 | EIVHIQAGQCGNQIGAK                                  | R | F | 1,822.92 |
| 74 | TUBB2A Tubulin beta-2A chain                                                                                         | IPI00013475,IPI00031370                         | 49,889.10 | 3 | 19 | EIVHIQAGQCGNQIGAK                                  | R | F | 1,822.92 |

|     |                                                                                    |                                                             |           |   |    |                        |   |   |          |
|-----|------------------------------------------------------------------------------------|-------------------------------------------------------------|-----------|---|----|------------------------|---|---|----------|
| 75  | TUBB2A Tubulin beta-2A chain                                                       | IPI00013475,IPI00031370                                     | 49,889.10 | 3 | 19 | EIVHIQAGQCGNQIGAK      | R | F | 1,822.92 |
| 76  | TUBB2C Tubulin beta-2C chain                                                       | IPI00007752                                                 | 49,812.70 | 3 | 19 | EIVHLQAGQCGNQIGAK      | R | F | 1,822.92 |
| 77  | TUBB2C Tubulin beta-2C chain                                                       | IPI00007752                                                 | 49,812.70 | 3 | 19 | EIVHLQAGQCGNQIGAK      | R | F | 1,822.92 |
| 78  | TUBB2C Tubulin beta-2C chain                                                       | IPI00007752                                                 | 49,812.70 | 3 | 19 | EIVHLQAGQCGNQIGAK      | R | F | 1,822.92 |
| 79  | RPL9 60S ribosomal protein L9                                                      | IPI00031691                                                 | 21,845.70 | 3 | 21 | TILSNQTVDIPENVDTLTK    | K | G | 2,113.14 |
| 80  | CTPS CTP synthase 1                                                                | IPI00290142                                                 | 66,672.70 | 3 | 16 | YILVTGGVISGIGK         | K | G | 1,376.82 |
| 81  | CTPS2 CTP synthase 2                                                               | IPI00645702                                                 | 65,661.40 | 3 | 16 | YILVTGGVISGIGK         | K | G | 1,376.82 |
| 82  | GUK1 Guanylate kinase 1                                                            | IPI00514494,IPI00515106,IPI00644488                         | 23,479.80 | 4 | 16 | RPLAGLAAAALGR          | R | A | 1,236.75 |
| 83  | PRC1 Isoform 1 of Protein regulator of cytokinesis 1                               | IPI00022629,IPI00399304,IPI00748507,IPI00871281,IPI00915034 | 71,589.90 | 4 | 17 | SEVLAESIVCLQK          | R | A | 1,604.82 |
| 84  | SNRPA1 U2 small nuclear ribonucleoprotein A'                                       | IPI00297477                                                 | 28,399.10 | 4 | 20 | LTAEIEQAAQYTN AVR      | K | D | 1,890.99 |
| 85  | RBM4 Isoform 1 of RNA-binding protein 4                                            | IPI00003704                                                 | 40,296.20 | 4 | 11 | LFIGNLPR               | K | E | 929.5568 |
| 86  | RBM4 Isoform 1 of RNA-binding protein 4                                            | IPI00003704                                                 | 40,296.20 | 4 | 11 | LFIGNLPR               | K | E | 929.5568 |
| 87  | RBM4 Isoform 1 of RNA-binding protein 4                                            | IPI00003704                                                 | 40,296.20 | 4 | 11 | LFIGNLPR               | K | E | 929.5568 |
| 88  | BZW2 Basic leucine zipper and W2 domain-containing protein 2                       | IPI00022305,IPI00894416                                     | 48,146.00 | 4 | 13 | HQKPVL TGQR            | K | F | 1,163.66 |
| 89  | GMPPA Isoform 1 of Mannose-1-phosphate quanyltransferase alpha                     | IPI00101782,IPI00657888                                     | 46,273.80 | 4 | 13 | AVILIGGPQK             | K | G | 995.625  |
| 90  | DNAJB1 DnaJ homolog subfamily B member 1                                           | IPI00015947                                                 | 38,027.60 | 4 | 13 | DYYQTLGLAR             | K | G | 1,199.61 |
| 91  | BTF3 Isoform 1 of Transcription factor BTF3                                        | IPI00221035                                                 | 22,150.30 | 4 | 13 | TGAPAQADSR             | R | G | 973.4698 |
| 92  | BTF3 Isoform 1 of Transcription factor BTF3                                        | IPI00221035                                                 | 22,150.30 | 4 | 13 | TGAPAQADSR             | R | G | 973.4698 |
| 93  | PSMA6 Proteasome subunit alpha type-6                                              | IPI00029623                                                 | 27,381.50 | 4 | 11 | GSSAGFDR               | R | H | 796.3584 |
| 94  | PSMA1 Isoform Short of Proteasome subunit alpha type-1                             | IPI00016832,IPI00472442                                     | 29,538.00 | 4 | 18 | NQYDNDVTWSPQGR         | R | I | 1,778.81 |
| 95  | GAPDH Glyceraldehyde-3-phosphate dehydrogenase                                     | IPI00219018                                                 | 36,035.30 | 4 | 13 | VKVG VNGFGR            | K | I | 1,032.59 |
| 96  | STT3A Dolichyl-diphosphooligosaccharide--protein qlvcosyltransferase subunit STT3A | IPI00297492                                                 | 80,514.80 | 4 | 8  | FGFLR                  | K | L | 639.3613 |
| 97  | HNRNPA1 Isoform A1-B of Heterogeneous nuclear ribonucleoprotein A1                 | IPI00215965,IPI00465365                                     | 38,828.10 | 4 | 15 | SESPKEPEQLRK           | K | L | 1,427.75 |
| 98  | PSIP1 Isoform 1 of PC4 and SFRS1-interacting protein                               | IPI00028122                                                 | 60,085.90 | 4 | 14 | DFKPGDLIFAK            | R | M | 1,250.68 |
| 99  | PSIP1 Isoform 1 of PC4 and SFRS1-interacting protein                               | IPI00028122                                                 | 60,085.90 | 4 | 14 | DFKPGDLIFAK            | R | M | 1,250.68 |
| 100 | AP1S1 Isoform 1 of AP-1 complex subunit sigma-1A                                   | IPI00152898                                                 | 18,715.90 | 4 | 10 | FMLLFSR                | R | Q | 929.4914 |
| 101 | DGCR6L Protein DGCR6L                                                              | IPI00260322                                                 | 24,914.40 | 4 | 16 | YAAALEEVADGAR          | R | Q | 1,335.65 |
| 102 | EEF1A2 Elongation factor 1-alpha 2                                                 | IPI00014424                                                 | 50,452.60 | 4 | 20 | EKTHINIVVIGHVDSGK      | K | S | 1,846.02 |
| 103 | EEF1A1 Elongation factor 1-alpha 1                                                 | IPI00396485                                                 | 50,123.20 | 4 | 20 | EKTHINIVVIGHVDSGK      | K | S | 1,846.02 |
| 104 | RPS15A 40S ribosomal protein S15a                                                  | IPI00221091                                                 | 14,822.00 | 4 | 12 | MNVLADALK              | R | S | 990.529  |
| 105 | NHP2 H/ACA ribonucleoprotein complex subunit 2                                     | IPI00041325,IPI00654617                                     | 17,183.10 | 4 | 22 | IKADPDGPEAQAEACSGER    | K | T | 2,000.90 |
| 106 | MCTS1 Isoform 1 of Malignant T cell amplified sequence 1                           | IPI00179026                                                 | 20,537.90 | 4 | 18 | KFDEKENVSNCIQLK        | K | T | 1,851.93 |
| 107 | HSPA1A;HSPA1B Heat shock 70 kDa protein 1                                          | IPI00304925                                                 | 70,036.00 | 4 | 25 | AAAIGIDL GTTYSCVGVFQHG | K | V | 2,265.13 |
| 108 | - cDNA FLJ54408, highly similar to Heat shock 70 kDa protein 1                     | IPI00911039                                                 | 63,907.90 | 4 | 25 | AAAIGIDL GTTYSCVGVFQHG | K | V | 2,265.13 |
| 109 | HSPA8 Isoform 1 of Heat shock cognate 71 kDa protein                               | IPI00003865                                                 | 70,881.80 | 4 | 25 | GPAVGIDL GTTYSCVGVFQH  | K | V | 2,263.12 |
| 110 | IGF2BP1 Insulin-like growth factor 2 mRNA-binding protein 1                        | IPI00008557                                                 | 63,438.30 | 4 | 20 | LYIGNLNESVTPADLEK      | K | V | 1,875.97 |
| 111 | CTTN Src substrate cortactin                                                       | IPI00029601                                                 | 61,567.40 | 4 | 38 | ASAGHAVSIAQDDAGADDWE   | K | W | 3,745.65 |
| 112 | C2orf34 Isoform 1 of Uncharacterized protein C2orf34                               | IPI00470629,IPI00855870,IPI00893022,IPI00893409             | 36,110.20 | 5 | 15 | TDPDFVNDVSEKEQR        | R | A | 1,047.51 |
| 113 | OLA1 Isoform 1 of Obg-like ATPase 1                                                | IPI00290416,IPI00916847                                     | 44,727.40 | 5 | 18 | KGGDGIKPPPIIGR         | K | F | 1,404.83 |
| 114 | PSMA2 Proteasome subunit alpha type-2                                              | IPI00219622                                                 | 25,880.90 | 5 | 18 | GYSFSLTTFSPSGK         | R | L | 1,478.72 |
| 115 | C12orf44 UPF0453 protein C12orf44                                                  | IPI00305296                                                 | 24,984.30 | 5 | 15 | SEVLEVSVEGR            | R | Q | 1,203.62 |

|     |                                                                                   |                                                                                                                                                                                                                                                                         |           |   |    |                                             |   |   |          |
|-----|-----------------------------------------------------------------------------------|-------------------------------------------------------------------------------------------------------------------------------------------------------------------------------------------------------------------------------------------------------------------------|-----------|---|----|---------------------------------------------|---|---|----------|
| 116 | YEATS4 YEATS domain-containing protein 4                                          | IPI00008536                                                                                                                                                                                                                                                             | 26,482.30 | 5 | 15 | MAEFGPDSGGR                                 | R | V | 1,139.48 |
| 117 | UBE2D2 Ubiquitin-conjugating enzyme E2 D2                                         | IPI00332376                                                                                                                                                                                                                                                             | 16,718.10 | 6 | 15 | IHKELNDLAR                                  | R | D | 1,208.67 |
| 118 | PARK7 Protein DJ-1                                                                | IPI00298547                                                                                                                                                                                                                                                             | 19,873.10 | 6 | 12 | ALVILAK                                     | R | G | 727.5077 |
| 119 | LBR Lamin-B receptor                                                              | IPI00292135,IPI00645733,IPI00647596                                                                                                                                                                                                                                     | 70,688.30 | 6 | 13 | FADGEVVR                                    | K | G | 892.4523 |
| 120 | TPT1 Translationally-controlled tumor protein                                     | IPI00550900                                                                                                                                                                                                                                                             | 19,578.20 | 6 | 19 | DLISHDEMFSDIYK                              | R | I | 1,712.78 |
| 121 | PRPS1 Ribose-phosphate pyrophosphokinase 1                                        | IPI00219616,IPI00917169                                                                                                                                                                                                                                                 | 34,816.70 | 6 | 18 | IFSGSSHQDLSQK                               | K | I | 1,433.70 |
| 122 | PCNA Proliferating cell nuclear antigen                                           | IPI00021700                                                                                                                                                                                                                                                             | 28,751.30 | 6 | 13 | LVQGSILK                                    | R | K | 857.5456 |
| 123 | UNG Isoform 2 of Uracil-DNA glycosylase                                           | IPI00011069                                                                                                                                                                                                                                                             | 34,627.40 | 6 | 17 | TLYSFFSPSPAR                                | K | K | 1,372.69 |
| 124 | RPL15 60S ribosomal protein L15                                                   | IPI00470528,IPI00550032,IPI00909437                                                                                                                                                                                                                                     | 24,128.50 | 6 | 12 | YIQELWR                                     | K | K | 1,007.53 |
| 125 | PDLIM7 Isoform 1 of PDZ and LIM domain protein 7                                  | IPI00023122,IPI00023560                                                                                                                                                                                                                                                 | 49,826.40 | 6 | 17 | VVLEGPAPWGFR                                | K | L | 1,327.72 |
| 126 | C14orf166 UPF0568 protein C14orf166                                               | IPI00006980                                                                                                                                                                                                                                                             | 28,051.30 | 6 | 26 | LTALDYHNPAGFNCKDETEFR                       | K | N | 2,498.14 |
| 127 | ANP32B Isoform 1 of Acidic leucine-rich nuclear phosphoprotein 32 family member B | IPI00007423,IPI00759824                                                                                                                                                                                                                                                 | 28,770.60 | 6 | 12 | RIHLELR                                     | R | N | 936.5738 |
| 128 | ANP32A Acidic leucine-rich nuclear phosphoprotein 32 family member A              | IPI00025849                                                                                                                                                                                                                                                             | 28,568.10 | 6 | 12 | RIHLELR                                     | R | N | 936.5738 |
| 129 | TPRG1L Isoform 2 of Tumor protein p63-regulated gene 1-like protein               | IPI00102976,IPI00413578                                                                                                                                                                                                                                                 | 23,329.00 | 6 | 43 | DSVDSAGTSPTAVLAAGEEV<br>GAGGGPGGGRRPGAGTPLR | R | Q | 3,348.64 |
| 130 | NAT13 Isoform 1 of N-acetyltransferase 13                                         | IPI00018627                                                                                                                                                                                                                                                             | 19,380.90 | 6 | 17 | IELGDVTPHNIK                                | R | Q | 1,335.73 |
| 131 | NAT13 Isoform 1 of N-acetyltransferase 13                                         | IPI00018627                                                                                                                                                                                                                                                             | 19,380.90 | 6 | 17 | IELGDVTPHNIK                                | R | Q | 1,335.73 |
| 132 | HMGN1;LOC643790 Non-histone chromosomal protein HMG-14                            | IPI00554761,IPI00893375,IPI00893633,IPI00894043                                                                                                                                                                                                                         | 10,641.10 | 6 | 18 | VSSAEGAAKEEPK                               | K | R | 1,302.65 |
| 133 | NIT2 Nitrilase homolog 2                                                          | IPI00549467,IPI00872668                                                                                                                                                                                                                                                 | 30,590.80 | 6 | 17 | LALIQLQISSIK                                | R | S | 1,326.84 |
| 134 | KRAS Isoform 2B of GTPase KRas                                                    | IPI00423570                                                                                                                                                                                                                                                             | 21,406.80 | 6 | 16 | LVVVGAGGVGK                                 | K | S | 955.5936 |
| 135 | EEF1A2 Elongation factor 1-alpha 2                                                | IPI00014424                                                                                                                                                                                                                                                             | 50,452.60 | 6 | 20 | THINIVVIGHVDSGK                             | K | S | 1,588.88 |
| 136 | EEF1A1 Elongation factor 1-alpha 1                                                | IPI00396485                                                                                                                                                                                                                                                             | 50,123.20 | 6 | 20 | THINIVVIGHVDSGK                             | K | S | 1,588.88 |
| 137 | EEF1A1 Elongation factor 1-alpha 1                                                | IPI00396485                                                                                                                                                                                                                                                             | 50,123.20 | 6 | 20 | THINIVVIGHVDSGK                             | K | S | 1,588.88 |
| 138 | EEF1A1 Elongation factor 1-alpha 1                                                | IPI00396485                                                                                                                                                                                                                                                             | 50,123.20 | 6 | 20 | THINIVVIGHVDSGK                             | K | S | 1,588.88 |
| 139 | RAC1 Isoform A of Ras-related C3 botulinum toxin substrate 1                      | IPI00010271,IPI00219675                                                                                                                                                                                                                                                 | 21,432.60 | 6 | 16 | CVVVDGDAVGK                                 | K | T | 1,060.55 |
| 140 | CDC42 Isoform 2 of Cell division control protein 42 homolog                       | IPI00016786,IPI00909484                                                                                                                                                                                                                                                 | 21,240.70 | 6 | 16 | CVVVDGDAVGK                                 | K | T | 1,060.55 |
| 141 | RHOG Rho-related GTP-binding protein RhoG                                         | IPI00017342                                                                                                                                                                                                                                                             | 21,290.10 | 6 | 16 | CVVVDGDAVGK                                 | K | T | 1,060.55 |
| 142 | RAC3 Ras-related C3 botulinum toxin substrate 3                                   | IPI00023138                                                                                                                                                                                                                                                             | 21,361.10 | 6 | 16 | CVVVDGDAVGK                                 | K | T | 1,060.55 |
| 143 | PCNA Proliferating cell nuclear antigen                                           | IPI00021700                                                                                                                                                                                                                                                             | 28,751.30 | 6 | 14 | LVQGSILKK                                   | R | V | 985.6406 |
| 144 | RPL23A;hCG_16001 60S ribosomal protein L23a                                       | IPI00021266                                                                                                                                                                                                                                                             | 17,678.20 | 7 | 18 | KEAPAPPKAEAK                                | K | A | 1,236.69 |
| 145 | RPL23A;hCG_16001 60S ribosomal protein L23a                                       | IPI00021266                                                                                                                                                                                                                                                             | 17,678.20 | 7 | 18 | KEAPAPPKAEAK                                | K | A | 1,236.69 |
| 146 | UBB;RPS27A;UBC ubiquitin and ribosomal protein S27a precursor                     | IPI00179330,IPI00456429,IPI00719280,IPI00743241,IPI00743650,IPI00744274,IPI00784990,IPI00789107,IPI00789823,IPI00790633,IPI00792712,IPI00793330,IPI00793729,IPI00793810,IPI00794211,IPI00794925,IPI00795527,IPI00796007,IPI00796600,IPI00797400,IPI00798127,IPI00798155 | 17,947.60 | 7 | 27 | TLTGKTITLEVEPSDTIENVK                       | K | A | 2,288.22 |
| 147 | ACTR2 Actin-related protein 2                                                     | IPI00005159                                                                                                                                                                                                                                                             | 44,743.70 | 7 | 19 | KVVVCDNGTGFVK                               | R | C | 1,422.74 |
| 148 | PEX11B Peroxisomal membrane protein 11B                                           | IPI00021978                                                                                                                                                                                                                                                             | 28,414.50 | 7 | 14 | FSAQSQR                                     | R | E | 894.4427 |
| 149 | TMBIM6 Bax inhibitor 1                                                            | IPI00022748,IPI00847321                                                                                                                                                                                                                                                 | 26,521.40 | 7 | 15 | KINFDALLK                                   | R | F | 1,061.64 |
| 150 | TFRC Transferrin receptor protein 1                                               | IPI00022462                                                                                                                                                                                                                                                             | 84,855.60 | 7 | 22 | SAFSNLFNGGEPLSYTR                           | R | F | 1,745.85 |
| 151 | TFRC Transferrin receptor protein 1                                               | IPI00022462                                                                                                                                                                                                                                                             | 84,855.60 | 7 | 22 | SAFSNLFNGGEPLSYTR                           | R | F | 1,745.85 |
| 152 | CMAS Isoform 1 of N-acylneuraminase cytidyltransferase                            | IPI00303158                                                                                                                                                                                                                                                             | 48,361.60 | 7 | 16 | GAATSVSNPR                                  | K | G | 959.4904 |
| 153 | PGK1 Phosphoglycerate kinase 1                                                    | IPI00169383                                                                                                                                                                                                                                                             | 44,597.30 | 7 | 15 | LTLDKLDVK                                   | K | G | 1,044.63 |
| 154 | NME2 Nucleoside diphosphate kinase B                                              | IPI00026260                                                                                                                                                                                                                                                             | 17,280.20 | 7 | 18 | TFIAIKPDGVQR                                | R | G | 1,344.76 |
| 155 | HNRNPH3 Isoform 1 of Heterogeneous nuclear ribonucleoprotein H3                   | IPI00013877,IPI00216492                                                                                                                                                                                                                                                 | 36,909.60 | 7 | 19 | HNGPNDASDGTVR                               | K | L | 1,339.60 |
| 156 | MCL1 Isoform 1 of Induced myeloid leukemia cell differentiation protein Mcl-1     | IPI00030356                                                                                                                                                                                                                                                             | 37,320.20 | 7 | 34 | NAVIGLNLYCGGAGLGAGSG<br>GATRPPGGR           | R | L | 2,573.30 |
| 157 | MCL1 Isoform 1 of Induced myeloid leukemia cell differentiation protein Mcl-1     | IPI00030356                                                                                                                                                                                                                                                             | 37,320.20 | 7 | 34 | NAVIGLNLYCGGAGLGAGSG<br>GATRPPGGR           | R | L | 2,573.30 |

|     |                                                                                     |                                                                                     |            |   |    |                              |   |   |          |
|-----|-------------------------------------------------------------------------------------|-------------------------------------------------------------------------------------|------------|---|----|------------------------------|---|---|----------|
| 158 | ANP32E Acidic leucine-rich nuclear phosphoprotein 32 family member E                | IPi00165393                                                                         | 30,675.30  | 7 | 12 | INLELR                       | K | N | 757.4567 |
| 159 | OTUD5 Isoform 1 of OTU domain-containing protein 5                                  | IPi00640364,IPi00641956                                                             | 60,606.80  | 7 | 31 | KKPPPPDADPANEP PPPGPM        | K | R | 2,583.30 |
| 160 | DRG2 Developmentally-regulated GTP-binding protein 2                                | IPi00022697,IPi00794194                                                             | 40,729.80  | 7 | 16 | PPAPR<br>ISEIEKEIAR          | K | T | 1,187.66 |
| 161 | CTD SPL2 Isoform 1 of CTD small phosphatase-like protein 2                          | IPi00033054,IPi00871437                                                             | 52,982.30  | 7 | 19 | KASQQSNQIQ TQR               | R | T | 1,516.78 |
| 162 | RPS19 40S ribosomal protein S19                                                     | IPi00215780                                                                         | 16,042.50  | 8 | 16 | DVNQQEFVR                    | K | A | 1,134.55 |
| 163 | BLVRA Biliverdin reductase A                                                        | IPi00294158                                                                         | 33,411.00  | 8 | 18 | KFGV VVVGVGR                 | R | A | 1,116.69 |
| 164 | SH3GLB2 Isoform 1 of Endophilin-B2                                                  | IPi00024540,IPi00398828                                                             | 43,957.20  | 8 | 18 | LASDAGIFFTR                  | K | A | 1,197.63 |
| 165 | FYT TD1 Forty-two-three domain-containing protein 1                                 | IPi00289907                                                                         | 35,782.20  | 8 | 20 | LVGATATSSPPPK                | R | A | 1,225.68 |
| 166 | ABCE1 ATP-binding cassette sub-family E member 1                                    | IPi00303207                                                                         | 67,298.40  | 8 | 15 | IAIVNHDK                     | R | C | 909.5153 |
| 167 | TMBIM6 Bax inhibitor 1                                                              | IPi00022748,IPi00847321                                                             | 26,521.40  | 8 | 15 | INF DALLK                    | K | F | 933.5405 |
| 168 | SPR Sepiapterin reductase                                                           | IPi00017469                                                                         | 28,031.50  | 8 | 17 | AVCLLTGASR                   | R | G | 1,047.56 |
| 169 | ATP1A1 Isoform Long of Sodium/potassium-transporting ATPase subunit alpha-1         | IPi00006482,IPi00646182                                                             | 112,881.50 | 8 | 22 | DKYEPAAVSEQGDKK              | R | G | 1,664.81 |
| 170 | HSDL2 Isoform 2 of Hydroxysteroid dehydrogenase-like protein 2                      | IPi00031107,IPi00414384                                                             | 45,378.60  | 8 | 20 | LAGCTV FITGASR               | R | G | 1,352.70 |
| 171 | FUNDC2 FUN14 domain-containing protein 2                                            | IPi00171769                                                                         | 20,657.80  | 8 | 18 | AGSQVVATTAR                  | R | H | 1,060.57 |
| 172 | LDHB L-lactate dehydrogenase B chain                                                | IPi00219217                                                                         | 36,620.60  | 8 | 23 | LIAPVAEEEEATVPNNK            | K | I | 1,694.90 |
| 173 | LDHB L-lactate dehydrogenase B chain                                                | IPi00219217                                                                         | 36,620.60  | 8 | 23 | LIAPVAEEEEATVPNNK            | K | I | 1,694.90 |
| 174 | APEX1 DNA-(apurinic or apyrimidinic site) lyase                                     | IPi00215911                                                                         | 35,537.70  | 8 | 24 | GAVAEDGDEL RTEPEAK           | K | K | 1,786.85 |
| 175 | ATP1B3 Sodium/potassium-transporting ATPase subunit beta-3                          | IPi00008167                                                                         | 31,495.70  | 8 | 17 | SLNQSLAEWK                   | K | L | 1,175.61 |
| 176 | ATP2A2 Isoform SERCA2A of Sarcoplasmic/endoplasmic reticulum calcium ATPase 2       | IPi00177817,IPi00219078,IPi00747443                                                 | 109,674.90 | 8 | 31 | TVEEVLGHFGVNESTGLSLE<br>QVKK | K | L | 2,600.36 |
| 177 | SNRNP40 cDNA FLJ56825, highly similar to WD repeat protein 57                       | IPi00006723                                                                         | 44,498.40  | 8 | 19 | KGPELPLVPVKR                 | R | Q | 1,332.84 |
| 178 | SNRNP40 cDNA FLJ56825, highly similar to WD repeat protein 57                       | IPi00006723                                                                         | 44,498.40  | 8 | 19 | KGPELPLVPVKR                 | R | Q | 1,332.84 |
| 179 | CHMP2A Charged multivesicular body protein 2a                                       | IPi00004416                                                                         | 25,087.00  | 8 | 16 | RKTPEELLR                    | R | Q | 1,141.67 |
| 180 | EZR Ezrin                                                                           | IPi00746388,IPi00843975,IPi00872684                                                 | 69,265.40  | 8 | 26 | VTTMDAELEFAIQPNTTGK          | R | Q | 2,082.01 |
| 181 | EEF1B2 Elongation factor 1-beta                                                     | IPi00178440                                                                         | 24,746.20  | 8 | 22 | SPAGLQVLNDYLADK              | K | S | 1,603.83 |
| 182 | CTD SPL2 Isoform 1 of CTD small phosphatase-like protein 2                          | IPi00033054,IPi00871437                                                             | 52,982.30  | 8 | 19 | ASQQSNQIQ TQR                | K | T | 1,388.69 |
| 183 | DRG1 Developmentally-regulated GTP-binding protein 1                                | IPi00031836                                                                         | 40,525.80  | 8 | 17 | IAEIEAEMAR                   | K | T | 1,148.56 |
| 184 | PAK4 Isoform 1 of Serine/threonine-protein kinase PAK 4                             | IPi00014068                                                                         | 64,054.80  | 8 | 20 | RVEISAPSNFEHR                | K | V | 1,541.78 |
| 185 | KIAA1524 Isoform 1 of Protein CIP2A                                                 | IPi00154283                                                                         | 102,171.30 | 9 | 18 | SLLLTVSQYK                   | K | A | 1,151.67 |
| 186 | RPS10 40S ribosomal protein S10                                                     | IPi00008438                                                                         | 18,880.30  | 9 | 17 | IAIYELLFK                    | R | E | 1,109.66 |
| 187 | BUB3 Mitotic checkpoint protein BUB3                                                | IPi00013468,IPi00514701,IPi00644108                                                 | 37,136.70  | 9 | 21 | LNQPPEDGISSVK                | K | F | 1,383.71 |
| 188 | HNRNPA0 Heterogeneous nuclear ribonucleoprotein A0                                  | IPi00011913                                                                         | 30,822.50  | 9 | 24 | LFIGGLNVQTSSEGLR             | K | G | 1,690.91 |
| 189 | HNRNPA0 Heterogeneous nuclear ribonucleoprotein A0                                  | IPi00011913                                                                         | 30,822.50  | 9 | 24 | LFIGGLNVQTSSEGLR             | K | G | 1,690.91 |
| 190 | SNRPD3 Small nuclear ribonucleoprotein Sm D3                                        | IPi00017964,IPi00878876,IPi00879750                                                 | 13,898.60  | 9 | 29 | VLHEAEGHIVT CETNTGEVYR       | K | G | 2,414.14 |
| 191 | BTF3L4 Transcription factor BTF3 homolog 4                                          | IPi00412792                                                                         | 17,253.00  | 9 | 14 | LQAQVR                       | K | I | 714.4257 |
| 192 | AHCY Adenosylhomocysteinase                                                         | IPi00012007                                                                         | 47,699.10  | 9 | 19 | VADIGLAAWGR                  | K | K | 1,128.62 |
| 193 | RPL30 60S ribosomal protein L30                                                     | IPi00219156,IPi00872940                                                             | 12,766.70  | 9 | 17 | KSLESINSR                    | K | L | 1,033.56 |
| 194 | SNRPB Isoform SM-B' of Small nuclear ribonucleoprotein-associated proteins B and B' | IPi00027285,IPi00220360,IPi00329512,IPi00395674,IPi00785142,IPi00844420,IPi00877103 | 24,592.60  | 9 | 16 | MLQHIDYR                     | K | M | 1,091.53 |
| 195 | SSR3 cDNA FLJ52061, highly similar to Translocon-associated protein subunit gamma   | IPi00009235                                                                         | 22,593.20  | 9 | 22 | QQSEEDLLLQDFSR               | K | N | 1,707.82 |

|     |                                                                                           |                                                                                                                                                 |            |    |    |                            |   |   |          |
|-----|-------------------------------------------------------------------------------------------|-------------------------------------------------------------------------------------------------------------------------------------------------|------------|----|----|----------------------------|---|---|----------|
| 196 | LSM4 U6 snRNA-associated Sm-like protein LSM4                                             | IPI00294955                                                                                                                                     | 15,332.00  | 9  | 20 | TAQNHPMLVELK               | K | N | 1,380.73 |
| 197 | PITPNB Isoform 1 of Phosphatidylinositol transfer protein beta isoform                    | IPI00334907                                                                                                                                     | 31,522.30  | 9  | 31 | VVLPCSVQEYQVGLYSVAE<br>ASK | R | N | 2,554.29 |
| 198 | PPP2CA Serine/threonine-protein phosphatase 2A catalytic subunit alpha isoform            | IPI00008380                                                                                                                                     | 35,576.50  | 9  | 21 | ELDQWIEQLNECK              | K | Q | 1,704.79 |
| 199 | PPP2CA Serine/threonine-protein phosphatase 2A catalytic subunit alpha isoform            | IPI00008380                                                                                                                                     | 35,576.50  | 9  | 21 | ELDQWIEQLNECK              | K | Q | 1,704.79 |
| 200 | SNRNP40 cDNA FLJ56825, highly similar to WD repeat protein 57                             | IPI00006723                                                                                                                                     | 44,498.40  | 9  | 19 | GPELPLVPVKR                | K | Q | 1,204.74 |
| 201 | RDX Radixin, isoform CRA_a                                                                | IPI00017367,IPI00903145                                                                                                                         | 71,032.60  | 9  | 27 | VTTMDAELEFAIQPNTTGK        | R | Q | 2,082.01 |
| 202 | MSN Moesin                                                                                | IPI00219365,IPI00872814                                                                                                                         | 67,803.80  | 9  | 27 | VTTMDAELEFAIQPNTTGK        | R | Q | 2,082.01 |
| 203 | HAX1 cDNA FLJ53021, highly similar to HS1-associating protein X-1                         | IPI00010440,IPI00641973                                                                                                                         | 32,443.00  | 9  | 17 | GFFGFPGPR                  | R | S | 981.4942 |
| 204 | FARSB Phenylalanyl-tRNA synthetase beta chain                                             | IPI00300074                                                                                                                                     | 66,114.60  | 9  | 17 | DLLFQALGR                  | R | T | 1,032.58 |
| 205 | TRUB2 Probable tRNA pseudouridine synthase 2                                              | IPI00024151                                                                                                                                     | 36,677.20  | 9  | 22 | LHGLFAVYKPPGLK             | R | W | 1,539.90 |
| 206 | MRPL11 39S ribosomal protein L11, mitochondrial                                           | IPI00007001,IPI00333848                                                                                                                         | 20,665.90  | 10 | 21 | GLRKPEVGGVIR               | R | A | 1,280.78 |
| 207 | CDK2 Cell division protein kinase 2                                                       | IPI00031681                                                                                                                                     | 33,912.70  | 10 | 20 | IGEGTYGVVYK                | K | A | 1,185.62 |
| 208 | CDK2 Cell division protein kinase 2                                                       | IPI00031681                                                                                                                                     | 33,912.70  | 10 | 20 | IGEGTYGVVYK                | K | A | 1,185.62 |
| 209 | RBMX Heterogeneous nuclear ribonucleoprotein G                                            | IPI00304692                                                                                                                                     | 42,315.70  | 10 | 22 | LFIGGLNTETNEK              | K | A | 1,435.74 |
| 210 | RBMX Heterogeneous nuclear ribonucleoprotein G                                            | IPI00304692                                                                                                                                     | 42,315.70  | 10 | 22 | LFIGGLNTETNEK              | K | A | 1,435.74 |
| 211 | RBMX Heterogeneous nuclear ribonucleoprotein G                                            | IPI00304692                                                                                                                                     | 42,315.70  | 10 | 22 | LFIGGLNTETNEK              | K | A | 1,435.74 |
| 212 | RBMX Heterogeneous nuclear ribonucleoprotein G                                            | IPI00304692                                                                                                                                     | 42,315.70  | 10 | 22 | LFIGGLNTETNEK              | K | A | 1,435.74 |
| 213 | SEC22B Vesicle-trafficking protein SEC22b                                                 | IPI00006865                                                                                                                                     | 24,723.40  | 10 | 28 | VADGLPLAASMQEDEQSGR        | R | D | 1,989.92 |
| 214 | SARS Seryl-tRNA synthetase, cytoplasmic                                                   | IPI00220637,IPI00514587                                                                                                                         | 58,760.60  | 10 | 20 | VDKGGDPALIR                | R | E | 1,140.64 |
| 215 | ARL6IP5 PRA1 family protein 3                                                             | IPI00007426,IPI00908696                                                                                                                         | 21,597.60  | 10 | 20 | AWDDFFPGSDR                | R | F | 1,312.56 |
| 216 | ARL6IP5 PRA1 family protein 3                                                             | IPI00007426,IPI00908696                                                                                                                         | 21,597.60  | 10 | 20 | AWDDFFPGSDR                | R | F | 1,312.56 |
| 217 | CAMK2G Isoform 4 of Calcium/calmodulin-dependent protein kinase type II gamma chain       | IPI00172450,IPI00172452,IPI00296678,IPI00334344,IPI00336118,IPI00556423,IPI00646849,IPI00908444,IPI00915309,IPI00915327,IPI00915383,IPI00915393 | 59,589.60  | 10 | 22 | FTDDYQLFEELGK              | R | G | 1,604.75 |
| 218 | CAMK2D Isoform Delta 6 of Calcium/calmodulin-dependent protein kinase type II delta chain | IPI00172636,IPI00430291,IPI00827573,IPI00827625,IPI00876923                                                                                     | 54,111.10  | 10 | 22 | FTDEYQLFEELGK              | R | G | 1,618.76 |
| 219 | NDUFA12 13kDa differentiation-associated protein variant (Fragment)                       | IPI00005966                                                                                                                                     | 17,196.50  | 10 | 21 | GLQQTGHGGLR                | R | G | 1,236.68 |
| 220 | CDC2 Putative uncharacterized protein DKFZp686L20222                                      | IPI00026689                                                                                                                                     | 34,762.10  | 10 | 20 | IGEGTYGVVYK                | K | G | 1,185.62 |
| 221 | CDC2 Putative uncharacterized protein DKFZp686L20222                                      | IPI00026689                                                                                                                                     | 34,762.10  | 10 | 20 | IGEGTYGVVYK                | K | G | 1,185.62 |
| 222 | AK1 Adenylate kinase isoenzyme 1                                                          | IPI00018342,IPI00640817                                                                                                                         | 21,617.10  | 10 | 21 | IIFVVGPGSGK                | K | G | 1,130.66 |
| 223 | WDR3 WD repeat-containing protein 3                                                       | IPI00009471                                                                                                                                     | 106,084.50 | 10 | 23 | YVASAVFGVIGSQK             | R | G | 1,425.77 |
| 224 | LPCAT1 1-acylglycerophosphocholine O-acyltransferase 1                                    | IPI00171626                                                                                                                                     | 59,134.80  | 10 | 22 | AAPASSAGASDAR              | R | L | 1,131.54 |
| 225 | RACGAP1 Rac GTPase-activating protein 1                                                   | IPI00152946                                                                                                                                     | 71,009.80  | 10 | 17 | NLFEQLVR                   | R | R | 1,018.57 |
| 226 | HAT1 Histone acetyltransferase type B catalytic subunit                                   | IPI00024719                                                                                                                                     | 49,496.20  | 10 | 15 | FLVEYK                     | K | S | 798.4396 |
| 227 | COMMD3 COMM domain-containing protein 3                                                   | IPI00015773,IPI00514459,IPI00514949,IPI00903231                                                                                                 | 22,133.90  | 10 | 18 | GFQMLADPR                  | K | S | 1,034.51 |
| 228 | BAX Isoform Epsilon of Apoptosis regulator BAX                                            | IPI00071059,IPI00443773,IPI00444945,IPI00845474                                                                                                 | 18,111.40  | 10 | 21 | GGGPTSSEQIMK               | R | T | 1,207.56 |
| 229 | POLD2 DNA polymerase delta subunit 2                                                      | IPI00025616,IPI00909525                                                                                                                         | 51,272.00  | 10 | 26 | AHTLLSPPSANNATFAR          | R | V | 1,767.91 |
| 230 | YWHAQ 14-3-3 protein theta                                                                | IPI00018146                                                                                                                                     | 27,747.40  | 10 | 18 | AKLAEQAER                  | K | Y | 1,015.55 |
| 231 | YWHAZ 14-3-3 protein zeta/delta                                                           | IPI00021263                                                                                                                                     | 27,727.90  | 10 | 18 | AKLAEQAER                  | K | Y | 1,015.55 |
| 232 | YWHAB Isoform Short of 14-3-3 protein beta/alpha                                          | IPI00759832                                                                                                                                     | 27,832.80  | 10 | 18 | AKLAEQAER                  | K | Y | 1,015.55 |
| 233 | RPL27 60S ribosomal protein L27                                                           | IPI00219155                                                                                                                                     | 15,780.40  | 10 | 17 | VVLVLAGR                   | K | Y | 826.5509 |
| 234 | TYSND1 Isoform 1 of Peroxisomal leader peptide-processing protease                        | IPI00303214                                                                                                                                     | 59,289.80  | 11 | 23 | AAEQAGCMVSASR              | R | A | 1,353.59 |
| 235 | MARCKSL1 MARCKS-related protein                                                           | IPI00641181                                                                                                                                     | 19,510.60  | 11 | 25 | GDVTAEEAAGASPAK            | R | A | 1,373.65 |
| 236 | SH3GLB1 Isoform 1 of Endophilin-B1                                                        | IPI00006558                                                                                                                                     | 40,780.00  | 11 | 21 | LAADAGTFLSR                | K | A | 1,121.60 |
| 237 | HSD17B4 Peroxisomal multifunctional enzyme type 2                                         | IPI00019912                                                                                                                                     | 79,670.40  | 11 | 23 | VVLVTGAGAGLGR              | R | A | 1,169.70 |

|     |                                                                                       |                                                                                                                                                                                                                                                                         |            |    |    |                   |   |   |          |
|-----|---------------------------------------------------------------------------------------|-------------------------------------------------------------------------------------------------------------------------------------------------------------------------------------------------------------------------------------------------------------------------|------------|----|----|-------------------|---|---|----------|
| 238 | SF3A2 SF3A2 protein (Fragment)                                                        | IPI00017341                                                                                                                                                                                                                                                             | 51,457.10  | 11 | 24 | TGSGGVASSSESNR    | K | D | 1,295.58 |
| 239 | SF3A2 SF3A2 protein (Fragment)                                                        | IPI00017341                                                                                                                                                                                                                                                             | 51,457.10  | 11 | 27 | TGSGGVASSSESNRDRR | K | E | 1,722.81 |
| 240 | - Putative uncharacterized protein<br>ENSP00000348237                                 | IPI00453476,IPI00549725                                                                                                                                                                                                                                                 | 28,832.80  | 11 | 21 | HGESAWNLENR       | R | F | 1,312.60 |
| 241 | DTD1 D-tyrosyl-tRNA(Tyr) deacylase 1                                                  | IPI00152692                                                                                                                                                                                                                                                             | 23,405.60  | 11 | 25 | ASVTVGGEQISAIGR   | R | G | 1,444.78 |
| 242 | GRB2 Isoform 1 of Growth factor receptor-bound protein 2                              | IPI00021327                                                                                                                                                                                                                                                             | 25,188.80  | 11 | 21 | ATADDELSFKR       | K | G | 1,252.62 |
| 243 | RPL3 60S ribosomal protein L3                                                         | IPI00550021                                                                                                                                                                                                                                                             | 46,091.50  | 11 | 19 | HGSLGFLPR         | R | K | 983.5422 |
| 244 | RPL7A 60S ribosomal protein L7a                                                       | IPI00299573                                                                                                                                                                                                                                                             | 29,978.30  | 11 | 20 | KVAPAPAVVK        | K | K | 979.6299 |
| 245 | PRAF2 PRA1 family protein 2                                                           | IPI00026994,IPI00640188                                                                                                                                                                                                                                                 | 19,240.40  | 11 | 21 | ALDDFVLGSAR       | R | L | 1,163.61 |
| 246 | PSMA5 Proteasome subunit alpha type-5                                                 | IPI00291922                                                                                                                                                                                                                                                             | 26,393.30  | 11 | 20 | GVNTFSPEGR        | R | L | 1,063.52 |
| 247 | APOBEC3C Probable DNA dC->dU-editing enzyme<br>APOBEC-3C                              | IPI00555878,IPI00872929                                                                                                                                                                                                                                                 | 22,808.00  | 11 | 22 | AMYPGTFYFQFK      | K | N | 1,515.70 |
| 248 | RANBP2 E3 SUMO-protein ligase RanBP2                                                  | IPI00221325,IPI00915960                                                                                                                                                                                                                                                 | 358,180.20 | 11 | 23 | YIASVQGSTPSPR     | R | Q | 1,362.70 |
| 249 | SYNGR2 Synaptogyrin-2                                                                 | IPI00013946,IPI00654744,IPI00789763                                                                                                                                                                                                                                     | 24,792.20  | 11 | 18 | AGGSFDLR          | K | R | 822.4105 |
| 250 | GRB2 Isoform 1 of Growth factor receptor-bound protein 2                              | IPI00021327                                                                                                                                                                                                                                                             | 25,188.80  | 11 | 20 | ATADDELSFK        | K | R | 1,096.52 |
| 251 | DNTTIP2 Deoxynucleotidyltransferase terminal-interacting protein 2                    | IPI00290410                                                                                                                                                                                                                                                             | 90,654.40  | 11 | 24 | ASQAASAESSGQK     | K | S | 1,334.65 |
| 252 | RAB18 Ras-related protein Rab-18                                                      | IPI00014577                                                                                                                                                                                                                                                             | 22,959.50  | 11 | 21 | ILIIGESGVGK       | K | S | 1,085.66 |
| 253 | RAB35 Ras-related protein Rab-35                                                      | IPI00300096                                                                                                                                                                                                                                                             | 23,007.20  | 11 | 21 | LLIIGDSGVGK       | K | S | 1,071.64 |
| 254 | RAB1B Ras-related protein Rab-1B                                                      | IPI00008964,IPI00896425                                                                                                                                                                                                                                                 | 22,154.00  | 11 | 21 | LLLIGDSGVGK       | K | S | 1,071.64 |
| 255 | RCC1 regulator of chromosome condensation 1 isoform a                                 | IPI00001661,IPI00747309,IPI00787306                                                                                                                                                                                                                                     | 48,126.30  | 11 | 19 | SPPADAIPK         | R | S | 895.4885 |
| 256 | SLC25A6 ADP/ATP translocase 3                                                         | IPI00291467                                                                                                                                                                                                                                                             | 32,849.10  | 11 | 23 | DFLAGGIAAAISK     | K | T | 1,233.68 |
| 257 | SLC25A5 ADP/ATP translocase 2                                                         | IPI00007188                                                                                                                                                                                                                                                             | 32,878.50  | 11 | 23 | DFLAGGVAAAISK     | K | T | 1,219.67 |
| 258 | SLC25A5 ADP/ATP translocase 2                                                         | IPI00007188                                                                                                                                                                                                                                                             | 32,878.50  | 11 | 23 | DFLAGGVAAAISK     | K | T | 1,219.67 |
| 259 | RAB8A Ras-related protein Rab-8A                                                      | IPI00028481                                                                                                                                                                                                                                                             | 23,651.60  | 11 | 21 | LLLIGDSGVGK       | K | T | 1,071.64 |
| 260 | RPL34 60S ribosomal protein L34                                                       | IPI00219160                                                                                                                                                                                                                                                             | 13,275.10  | 11 | 19 | LSYNTASNK         | R | T | 997.4948 |
| 261 | RAB7A Ras-related protein Rab-7a                                                      | IPI00016342                                                                                                                                                                                                                                                             | 23,472.00  | 11 | 21 | VIILGDSGVGK       | K | T | 1,057.63 |
| 262 | CHMP5 Charged multivesicular body protein 5                                           | IPI00100796                                                                                                                                                                                                                                                             | 24,553.80  | 12 | 27 | APPPSLTDCIGTVDSR  | K | A | 1,685.82 |
| 263 | YWHAB Isoform Short of 14-3-3 protein beta/alpha                                      | IPI00759832                                                                                                                                                                                                                                                             | 27,832.80  | 12 | 27 | LAEQAERYDDMAAMK   | K | A | 1,844.82 |
| 264 | YWHAQ 14-3-3 protein theta                                                            | IPI00018146                                                                                                                                                                                                                                                             | 27,747.40  | 12 | 27 | LAEQAERYDDMATCMK  | K | A | 1,931.83 |
| 265 | CHCHD2 Coiled-coil-helix-coiled-coil-helix domain-containing protein 2, mitochondrial | IPI00007673,IPI00872610                                                                                                                                                                                                                                                 | 15,494.30  | 12 | 18 | MAPPASR           | R | A | 729.3712 |
| 266 | UBB;RPS27A;UBC ubiquitin and ribosomal protein S27a precursor                         | IPI00179330,IPI00456429,IPI00719280,IPI00743241,IPI00743650,IPI00744274,IPI00784990,IPI00789107,IPI00789823,IPI00790633,IPI00792712,IPI00793330,IPI00793729,IPI00793810,IPI00794211,IPI00794925,IPI00795527,IPI00796007,IPI00796600,IPI00797400,IPI00798127,IPI00798155 | 17,947.60  | 12 | 27 | TITLEVEPSDTIENVK  | K | A | 1,787.93 |
| 267 | UBB;RPS27A;UBC ubiquitin and ribosomal protein S27a precursor                         | IPI00179330,IPI00456429,IPI00719280,IPI00743241,IPI00743650,IPI00744274,IPI00784990,IPI00789107,IPI00789823,IPI00790633,IPI00792712,IPI00793330,IPI00793729,IPI00793810,IPI00794211,IPI00794925,IPI00795527,IPI00796007,IPI00796600,IPI00797400,IPI00798127,IPI00798155 | 17,947.60  | 12 | 27 | TITLEVEPSDTIENVK  | K | A | 1,787.93 |
| 268 | UBB;RPS27A;UBC ubiquitin and ribosomal protein S27a precursor                         | IPI00179330,IPI00456429,IPI00719280,IPI00743241,IPI00743650,IPI00744274,IPI00784990,IPI00789107,IPI00789823,IPI00790633,IPI00792712,IPI00793330,IPI00793729,IPI00793810,IPI00794211,IPI00794925,IPI00795527,IPI00796007,IPI00796600,IPI00797400,IPI00798127,IPI00798155 | 17,947.60  | 12 | 27 | TITLEVEPSDTIENVK  | K | A | 1,787.93 |
| 269 | UBB;RPS27A;UBC ubiquitin and ribosomal protein S27a precursor                         | IPI00179330,IPI00456429,IPI00719280,IPI00743241,IPI00743650,IPI00744274,IPI00784990,IPI00789107,IPI00789823,IPI00790633,IPI00792712,IPI00793330,IPI00793729,IPI00793810,IPI00794211,IPI00794925,IPI00795527,IPI00796007,IPI00796600,IPI00797400,IPI00798127,IPI00798155 | 17,947.60  | 12 | 27 | TITLEVEPSDTIENVK  | K | A | 1,787.93 |
| 270 | UBB;RPS27A;UBC ubiquitin and ribosomal protein S27a precursor                         | IPI00179330,IPI00456429,IPI00719280,IPI00743241,IPI00743650,IPI00744274,IPI00784990,IPI00789107,IPI00789823,IPI00790633,IPI00792712,IPI00793330,IPI00793729,IPI00793810,IPI00794211,IPI00794925,IPI00795527,IPI00796007,IPI00796600,IPI00797400,IPI00798127,IPI00798155 | 17,947.60  | 12 | 27 | TITLEVEPSDTIENVK  | K | A | 1,787.93 |
| 271 | UBB;RPS27A;UBC ubiquitin and ribosomal protein S27a precursor                         | IPI00179330,IPI00456429,IPI00719280,IPI00743241,IPI00743650,IPI00744274,IPI00784990,IPI00789107,IPI00789823,IPI00790633,IPI00792712,IPI00793330,IPI00793729,IPI00793810,IPI00794211,IPI00794925,IPI00795527,IPI00796007,IPI00796600,IPI00797400,IPI00798127,IPI00798155 | 17,947.60  | 12 | 27 | TITLEVEPSDTIENVK  | K | A | 1,787.93 |
| 272 | SFRS3 Splicing factor, arginine/serine-rich 3                                         | IPI00010204,IPI00843996                                                                                                                                                                                                                                                 | 19,312.00  | 12 | 28 | VYVGNLGNNGNKTELER | K | A | 1,876.95 |

|     |                                                                       |                                     |           |    |    |                            |   |   |          |
|-----|-----------------------------------------------------------------------|-------------------------------------|-----------|----|----|----------------------------|---|---|----------|
| 273 | EIF2A Isoform 1 of Eukaryotic translation initiation factor 2A        | IPI00902564                         | 64,973.20 | 12 | 33 | GSEGLYMVNGPPHFTESTVF PR    | R | E | 2,422.15 |
| 274 | ATG3 Isoform 1 of Autophagy-related protein 3                         | IPI00022254                         | 35,846.20 | 12 | 27 | ALEVAEYLTPVLKESK           | K | F | 1,789.99 |
| 275 | LMNA Isoform A of Lamin-A/C                                           | IPI00021405                         | 74,122.60 | 12 | 25 | SGAQASSTPLSPTR             | R | I | 1,359.69 |
| 276 | PNO1 RNA-binding protein PNO1                                         | IPI00024524                         | 27,907.30 | 12 | 21 | AEEGFTQVTR                 | R | K | 1,137.55 |
| 277 | TKT cDNA FLJ54957, highly similar to Transketolase                    | IPI00643920                         | 68,725.40 | 12 | 21 | LQALKDTANR                 | K | L | 1,129.63 |
| 278 | SBDS Ribosome maturation protein SBDS                                 | IPI00427330                         | 28,745.90 | 12 | 19 | LTNAVAVR                   | R | M | 871.5359 |
| 279 | PES1 Isoform 1 of Pescadillo homolog 1                                | IPI00003768,IPI00554461,IPI00878536 | 67,986.90 | 12 | 20 | GSATNYITR                  | R | N | 982.4952 |
| 280 | UBL4A Ubiquitin-like protein 4A                                       | IPI00005658                         | 17,758.90 | 12 | 27 | ECSLQVPEDELVSTLK           | R | Q | 1,846.91 |
| 281 | RBM4 Isoform 1 of RNA-binding protein 4                               | IPI00003704                         | 40,296.20 | 12 | 19 | EATEQEIR                   | R | S | 975.4742 |
| 282 | RBM4 Isoform 1 of RNA-binding protein 4                               | IPI00003704                         | 40,296.20 | 12 | 19 | EATEQEIR                   | R | S | 975.4742 |
| 283 | YWHAZ 14-3-3 protein zeta/delta                                       | IPI00021263                         | 27,727.90 | 12 | 27 | LAEQAERYDDMAACMK           | K | S | 1,901.82 |
| 284 | DAZAP1 Isoform 1 of DAZ-associated protein 1                          | IPI00165230,IPI00335930             | 43,365.00 | 12 | 27 | LFVGGLDWSTTQETLR           | K | S | 1,822.93 |
| 285 | RAB10 Ras-related protein Rab-10                                      | IPI00016513                         | 22,524.10 | 12 | 22 | LLLIGDSGVGK                | K | T | 1,071.64 |
| 286 | EIF2B1 Translation initiation factor eIF-2B subunit alpha             | IPI00221300                         | 33,695.20 | 12 | 28 | SQMKEDPDMASAVAAIR          | K | T | 1,851.86 |
| 287 | FAR1 Fatty acyl-CoA reductase 1                                       | IPI00478838                         | 59,340.20 | 12 | 24 | NVLLTGATGFLGK              | K | V | 1,290.74 |
| 288 | YWHAQ 14-3-3 protein theta                                            | IPI00018146                         | 27,747.40 | 12 | 18 | LAEQAER                    | K | Y | 816.421  |
| 289 | YWHAZ 14-3-3 protein zeta/delta                                       | IPI00021263                         | 27,727.90 | 12 | 18 | LAEQAER                    | K | Y | 816.421  |
| 290 | YWHAB Isoform Short of 14-3-3 protein beta/alpha                      | IPI00759832                         | 27,832.80 | 12 | 18 | LAEQAER                    | K | Y | 816.421  |
| 291 | CCNA2 Cyclin-A2                                                       | IPI00022865                         | 48,519.60 | 13 | 37 | EAGSALLALQQTALQEDQENI NPEK | R | A | 2,710.35 |
| 292 | PARK7 Protein DJ-1                                                    | IPI00298547                         | 19,873.10 | 13 | 28 | GAEEMETVIPVDVMRR           | K | A | 1,863.89 |
| 293 | DNAJB6 Isoform A of DnaJ homolog subfamily B member 6                 | IPI00024523                         | 36,070.20 | 13 | 21 | HASPEDIKK                  | R | A | 1,024.54 |
| 294 | DNAJB6 Isoform A of DnaJ homolog subfamily B member 6                 | IPI00024523                         | 36,070.20 | 13 | 21 | HASPEDIKK                  | R | A | 1,024.54 |
| 295 | YWHAH 14-3-3 protein eta                                              | IPI00216319                         | 28,201.60 | 13 | 28 | LAEQAERYDDMASAMK           | R | A | 1,860.81 |
| 296 | CCDC99 Isoform 1 of Coiled-coil domain-containing protein 99          | IPI00030845,IPI00061356             | 58,945.50 | 13 | 22 | LKEAEERLK                  | R | A | 1,244.68 |
| 297 | ID4 DNA-binding protein inhibitor ID-4                                | IPI00026864                         | 16,604.40 | 13 | 26 | KAPSGCGGGELALR             | R | C | 1,372.70 |
| 298 | TARS Threonyl-tRNA synthetase, cytoplasmic                            | IPI00329633,IPI00908949             | 83,419.80 | 13 | 28 | MGGEEKPIGAGEEKQK           | K | E | 1,687.83 |
| 299 | YWHAE 14-3-3 protein epsilon                                          | IPI00000816                         | 29,157.00 | 13 | 28 | LAEQAERYDEMVESMK           | K | K | 1,928.87 |
| 300 | TXNDC9 Thioredoxin domain-containing protein 9                        | IPI00022386,IPI00917664             | 26,517.00 | 13 | 23 | VLEHQLLQTTK                | K | L | 1,309.75 |
| 301 | YWHAG 14-3-3 protein gamma                                            | IPI00220642                         | 28,285.10 | 13 | 28 | LAEQAERYDDMAAMK            | R | N | 1,844.82 |
| 302 | PARK7 Protein DJ-1                                                    | IPI00298547                         | 19,873.10 | 13 | 27 | GAEEMETVIPVDVMR            | K | R | 1,691.80 |
| 303 | AKR1B1 Aldose reductase                                               | IPI00413641                         | 35,835.90 | 13 | 22 | MPILGLGTWK                 | K | S | 1,115.63 |
| 304 | YWHAE 14-3-3 protein epsilon                                          | IPI00000816                         | 29,157.00 | 13 | 29 | LAEQAERYDEMVESMKK          | K | V | 2,056.97 |
| 305 | YWHAE 14-3-3 protein epsilon                                          | IPI00000816                         | 29,157.00 | 13 | 19 | LAEQAER                    | K | Y | 816.421  |
| 306 | YWHAH 14-3-3 protein eta                                              | IPI00216319                         | 28,201.60 | 13 | 19 | LAEQAER                    | R | Y | 816.421  |
| 307 | YWHAG 14-3-3 protein gamma                                            | IPI00220642                         | 28,285.10 | 13 | 19 | LAEQAER                    | R | Y | 816.421  |
| 308 | DNAJB1 DnaJ homolog subfamily B member 1                              | IPI00015947                         | 38,027.60 | 14 | 22 | GASDEEIKR                  | R | A | 1,004.50 |
| 309 | TSEN34 27 kDa protein                                                 | IPI00657943,IPI00658061,IPI00894217 | 27,261.80 | 14 | 26 | SLVWGAEAVQALR              | R | E | 1,399.77 |
| 310 | PRKAR1A cAMP-dependent protein kinase type I-alpha regulatory subunit | IPI00021831                         | 42,964.40 | 14 | 24 | SLRECELYVQK                | R | H | 1,424.72 |
| 311 | ALDOA Fructose-bisphosphate aldolase A                                | IPI00465439                         | 39,402.60 | 14 | 22 | KELSDIAHR                  | K | I | 1,068.58 |
| 312 | STIP1 Stress-induced-phosphoprotein 1                                 | IPI00013894,IPI00871856             | 62,624.10 | 14 | 32 | ALSVGNIDDALQCYSEAIK        | K | L | 2,067.01 |
| 313 | RAB1A Isoform 1 of Ras-related protein Rab-1A                         | IPI00005719,IPI00873902             | 22,660.40 | 14 | 24 | LLLIGDSGVGK                | K | S | 1,071.64 |
| 314 | AKR1A1 Alcohol dehydrogenase [NADP+]                                  | IPI00220271                         | 36,555.60 | 14 | 23 | MPLIGLGTWK                 | K | S | 1,115.63 |
| 315 | RAB11B Ras-related protein Rab-11B                                    | IPI00020436                         | 24,471.00 | 14 | 24 | VVLIGDSGVGK                | K | S | 1,043.61 |
| 316 | MYL6B;MYL6 Isoform Non-muscle of Myosin light polypeptide 6           | IPI00335168,IPI00789605,IPI00796366 | 16,911.80 | 14 | 21 | EAFQLFDR                   | K | T | 1,025.51 |
| 317 | CLINT1 Isoform 1 of Clathrin interactor 1                             | IPI00291930                         | 68,242.50 | 14 | 27 | ATNVVMNYSEIESK             | K | V | 1,600.75 |
| 318 | PFKP 6-phosphofructokinase type C                                     | IPI00009790                         | 85,579.40 | 15 | 25 | KFLEHLSGAGK                | R | A | 1,186.66 |

|     |                                                                           |                                                 |           |    |    |                                 |   |   |          |
|-----|---------------------------------------------------------------------------|-------------------------------------------------|-----------|----|----|---------------------------------|---|---|----------|
| 319 | APRT Adenine phosphoribosyltransferase                                    | IPI00218693,IPI00642457                         | 19,590.50 | 15 | 27 | SFPDFPTPGVVFR                   | R | D | 1,465.75 |
| 320 | CALM1;CALM3;CALM2 Calmodulin                                              | IPI00075248,IPI00386621,IPI00794543,IPI00916768 | 16,820.00 | 15 | 31 | EAFSLFDKDGDTITTK                | K | E | 1,844.89 |
| 321 | RPL31 60S ribosomal protein L31                                           | IPI00026302                                     | 14,445.20 | 15 | 23 | SAINEVVTR                       | R | E | 988.5421 |
| 322 | ALDOA Fructose-bisphosphate aldolase A                                    | IPI00465439                                     | 39,402.60 | 15 | 22 | ELSDIAHR                        | K | I | 940.4847 |
| 323 | COMMD8 COMM domain-containing protein 8                                   | IPI00016447,IPI00871891                         | 21,072.90 | 15 | 26 | LPAELGPQLLHK                    | K | I | 1,315.77 |
| 324 | CAPZB Isoform 2 of F-actin-capping protein subunit beta                   | IPI00642256                                     | 30,611.70 | 15 | 23 | RLPPQQIEK                       | R | N | 1,108.65 |
| 325 | ATIC Bifunctional purine biosynthesis protein PURH                        | IPI00289499                                     | 64,598.50 | 15 | 22 | TGLVEFAR                        | K | N | 892.4887 |
| 326 | SCYE1 Multisynthetase complex auxiliary component p43                     | IPI00006252,IPI00793201                         | 34,335.00 | 15 | 26 | GAEADQIIEYLK                    | K | Q | 1,349.69 |
| 327 | NIP30 NEFA-interacting nuclear protein NIP30                              | IPI00178750                                     | 28,894.80 | 15 | 24 | FVSEAELDER                      | R | R | 1,194.56 |
| 328 | RPS18;LOC100130553 40S ribosomal protein S18                              | IPI00013296                                     | 17,701.30 | 15 | 23 | VLNTNIDGR                       | R | R | 1,001.54 |
| 329 | EHD4 EH domain-containing protein 4                                       | IPI00005578                                     | 61,159.60 | 15 | 29 | AGGADAVQTVTGGLR                 | R | S | 1,372.72 |
| 330 | STMN1 Stathmin                                                            | IPI00479997                                     | 17,285.00 | 15 | 27 | ASGQAFELILSPR                   | R | S | 1,388.75 |
| 331 | HNRNPA1 Isoform A1-B of Heterogeneous nuclear ribonucleoprotein A1        | IPI00215965,IPI00465365                         | 38,828.10 | 15 | 31 | KLFIGGLSFETTDESLR               | R | S | 1,913.00 |
| 332 | ANP32A Acidic leucine-rich nuclear phosphoprotein 32 family member A      | IPI00025849                                     | 28,568.10 | 15 | 28 | TPSDVKELVLDNSR                  | R | S | 1,572.82 |
| 333 | RPS6 40S ribosomal protein S6                                             | IPI00021840                                     | 28,663.70 | 15 | 25 | LIEVDDERKLR                     | K | T | 1,385.77 |
| 334 | UBE2S Ubiquitin-conjugating enzyme E2 S                                   | IPI00217949                                     | 23,828.40 | 15 | 32 | LVYKEVTTLTADPPDGIK              | R | V | 1,960.06 |
| 335 | COPZ1 Coatomer subunit zeta-1                                             | IPI00032851                                     | 20,180.90 | 15 | 29 | AILILDNDGDRLFAK                 | K | Y | 1,673.92 |
| 336 | CBR1 Carbonyl reductase [NADPH] 1                                         | IPI00295386                                     | 30,356.80 | 16 | 23 | GIGLAIVR                        | K | D | 798.5197 |
| 337 | C2orf34 Isoform 1 of Uncharacterized protein C2orf34                      | IPI00470629,IPI00855870,IPI00893022,IPI00893409 | 36,110.20 | 16 | 28 | AAGGSPAVGCTTR                   | R | G | 1,204.57 |
| 338 | CCT6A T-complex protein 1 subunit zeta                                    | IPI00027626,IPI00552590                         | 58,007.30 | 16 | 28 | AQAALAVNISAAR                   | R | G | 1,255.71 |
| 339 | ENO1 Isoform alpha-enolase of Alpha-enolase                               | IPI00465248                                     | 47,152.20 | 16 | 28 | GNPTVEVDLFTSK                   | R | G | 1,406.72 |
| 340 | ENO1 Isoform alpha-enolase of Alpha-enolase                               | IPI00465248                                     | 47,152.20 | 16 | 28 | GNPTVEVDLFTSK                   | R | G | 1,406.72 |
| 341 | ENO1 Isoform alpha-enolase of Alpha-enolase                               | IPI00465248                                     | 47,152.20 | 16 | 28 | GNPTVEVDLFTSK                   | R | G | 1,406.72 |
| 342 | ENO2 Gamma-enolase                                                        | IPI00216171                                     | 47,251.70 | 16 | 28 | GNPTVEVDLYTAK                   | R | G | 1,406.72 |
| 343 | RNASEH2A Ribonuclease H2 subunit A                                        | IPI00290192                                     | 33,377.00 | 16 | 25 | LSSPVPVAVCR                     | R | K | 1,085.58 |
| 344 | RNASEH2A Ribonuclease H2 subunit A                                        | IPI00290192                                     | 33,377.00 | 16 | 25 | LSSPVPVAVCR                     | R | K | 1,085.58 |
| 345 | HN1L Isoform 1 of Hematological and neurological expressed 1-like protein | IPI00027397,IPI00909195                         | 20,045.60 | 16 | 42 | AMKPPGGESSNLFGSPEEAT<br>PSSRPNR | R | M | 2,816.33 |
| 346 | RPL23 60S ribosomal protein L23                                           | IPI00010153,IPI00795408                         | 14,847.90 | 16 | 35 | ISLGLPVGAVINCADNTGAK            | R | N | 1,970.04 |
| 347 | RPL23 60S ribosomal protein L23                                           | IPI00010153,IPI00795408                         | 14,847.90 | 16 | 35 | ISLGLPVGAVINCADNTGAK            | R | N | 1,970.04 |
| 348 | PPP1CA Serine/threonine-protein phosphatase PP1-alpha catalytic subunit   | IPI00550451                                     | 37,495.90 | 16 | 26 | LLEVQGSRP GK                    | R | N | 1,183.68 |
| 349 | GTF2E2 Transcription initiation factor IIE subunit beta                   | IPI00019981                                     | 33,027.00 | 16 | 25 | ALSTPVVEKR                      | R | S | 1,099.65 |
| 350 | HNRNPA1 Isoform A1-B of Heterogeneous nuclear ribonucleoprotein A1        | IPI00215965,IPI00465365                         | 38,828.10 | 16 | 31 | LFIGGLSFETTDESLR                | K | S | 1,784.91 |
| 351 | RAB6A Isoform 1 of Ras-related protein Rab-6A                             | IPI00023526,IPI00217943                         | 23,575.30 | 16 | 26 | LVFLGEQSVGK                     | K | T | 1,176.66 |
| 352 | MAPK1 Mitogen-activated protein kinase 1                                  | IPI00003479                                     | 41,373.90 | 16 | 24 | GQVFDVGP R                      | R | Y | 974.5055 |
| 353 | YEATS4 YEATS domain-containing protein 4                                  | IPI00008536                                     | 26,482.30 | 16 | 32 | VKGVTVKPIVYGNVAR                | R | Y | 1,813.11 |
| 354 | PFKL Isoform 1 of 6-phosphofructokinase, liver type                       | IPI00332371,IPI00902982                         | 85,001.20 | 17 | 35 | AIGVLTSGGDAQGMNAAVR             | K | A | 1,803.90 |
| 355 | RPLP0 60S acidic ribosomal protein P0                                     | IPI00008530                                     | 34,256.30 | 17 | 26 | IIQLDDYPK                       | K | C | 1,217.68 |
| 356 | PRDX1 Peroxiredoxin-1                                                     | IPI00000874                                     | 22,092.90 | 17 | 27 | ATAVMPDGQFK                     | K | D | 1,164.57 |
| 357 | RHOG Rho-related GTP-binding protein RhoG                                 | IPI00017342                                     | 21,290.10 | 17 | 30 | TCLLICYTTFNAFPK                 | K | E | 1,701.83 |
| 358 | HNRNPH2 Heterogeneous nuclear ribonucleoprotein H2                        | IPI00026230                                     | 49,246.10 | 17 | 29 | GLPWSCSADEV MR                  | R | F | 1,523.66 |
| 359 | HNRNPH2 Heterogeneous nuclear ribonucleoprotein H2                        | IPI00026230                                     | 49,246.10 | 17 | 29 | GLPWSCSADEV MR                  | R | F | 1,523.66 |
| 360 | HNRNPH1 Heterogeneous nuclear ribonucleoprotein H                         | IPI00013881,IPI00479191                         | 49,211.80 | 17 | 29 | GLPWSCSADEVQR                   | R | F | 1,504.69 |



|     |                                                                                                  |                                     |           |    |    |                                         |   |   |          |
|-----|--------------------------------------------------------------------------------------------------|-------------------------------------|-----------|----|----|-----------------------------------------|---|---|----------|
| 361 | HNRNPH1 Heterogeneous nuclear ribonucleoprotein H                                                | IPI00013881,IPI00479191             | 49,211.80 | 17 | 29 | GLPWSCSADEVQR                           | R | F | 1,504.69 |
| 362 | HNRNPH1 Heterogeneous nuclear ribonucleoprotein H                                                | IPI00013881,IPI00479191             | 49,211.80 | 17 | 29 | GLPWSCSADEVQR                           | R | F | 1,504.69 |
| 363 | HNRNPH1 Heterogeneous nuclear ribonucleoprotein H                                                | IPI00013881,IPI00479191             | 49,211.80 | 17 | 29 | GLPWSCSADEVQR                           | R | F | 1,504.69 |
| 364 | UBE2V1 Isoform 3 of Ubiquitin-conjugating enzyme E2 variant 1                                    | IPI00472498,IPI00514724             | 16,477.10 | 17 | 26 | LLEEELEGQK                              | R | G | 1,187.62 |
| 365 | RPL12 Isoform 1 of 60S ribosomal protein L12                                                     | IPI00024933                         | 17,801.10 | 17 | 31 | CTGGEV GATSALAPK                        | R | I | 1,418.69 |
| 366 | RPL12 Isoform 1 of 60S ribosomal protein L12                                                     | IPI00024933                         | 17,801.10 | 17 | 31 | CTGGEV GATSALAPK                        | R | I | 1,418.69 |
| 367 | PRDX2 Peroxiredoxin-2                                                                            | IPI00027350                         | 21,874.40 | 17 | 29 | ATAVVDGAFKEVK                           | K | L | 1,334.73 |
| 368 | C16orf14 Isoform 1 of Uncharacterized protein C16orf14                                           | IPI00042604                         | 17,809.50 | 17 | 27 | TGPTQQQVEGR                             | R | L | 1,200.60 |
| 369 | POLR2G DNA-directed RNA polymerase II subunit RPB7                                               | IPI00218895                         | 19,276.60 | 17 | 27 | YFGPNLLNTVK                             | R | Q | 1,265.69 |
| 370 | CTPS2 CTP synthase 2                                                                             | IPI00645702                         | 65,661.40 | 17 | 28 | GIIASSIGTILK                            | K | S | 1,172.73 |
| 371 | CTPS CTP synthase 1                                                                              | IPI00290142                         | 66,672.70 | 17 | 28 | GIIASSVGTILK                            | K | S | 1,158.71 |
| 372 | NOC4L Nucleolar complex protein 4 homolog                                                        | IPI00031661                         | 58,451.40 | 17 | 25 | RLEAVLASR                               | R | S | 1,014.61 |
| 373 | CGGBP1 CGG triplet repeat-binding protein 1                                                      | IPI00295585                         | 18,802.20 | 17 | 26 | TALYVTP LDR                             | K | V | 1,148.63 |
| 374 | RPA1 Replication protein A 70 kDa DNA-binding subunit                                            | IPI00020127                         | 68,121.00 | 17 | 41 | GDTNIK PILQVINIRPIT TGN SP<br>PR        | K | Y | 2,714.53 |
| 375 | EIF3K Eukaryotic translation initiation factor 3 subunit K                                       | IPI00033143                         | 25,042.40 | 17 | 31 | GIDRYNPENL ATLER                        | K | Y | 1,760.89 |
| 376 | DDAH2 N(G),N(G)-dimethylarginine dimethylaminohydrolase 2                                        | IPI00000760                         | 29,626.30 | 18 | 40 | GVPE SLASGEGAGAL PALD<br>LAK            | R | A | 2,080.09 |
| 377 | ILF3 Isoform 1 of Interleukin enhancer-binding factor 3                                          | IPI00298788                         | 95,320.90 | 18 | 40 | HSSVYPTQEELEAVQNMVSH<br>TER             | K | A | 2,671.24 |
| 378 | DDX56 Probable ATP-dependent RNA helicase DDX56                                                  | IPI00302281                         | 61,573.50 | 18 | 36 | LLQAVTDLGWSRPTLIQEK                     | R | A | 2,168.21 |
| 379 | RPS10 40S ribosomal protein S10                                                                  | IPI00008438                         | 18,880.30 | 18 | 25 | EGVMVAKK                                | K | D | 861.4863 |
| 380 | TCEAL8 Transcription elongation factor A protein-like 8                                          | IPI00217810                         | 13,597.70 | 18 | 51 | AEEDRPLEDV PQEAEGNPQP<br>SEEGVSQEAEGNPR | K | G | 3,689.64 |
| 381 | AK2 Isoform 1 of Adenylate kinase isoenzyme 2, mitochondrial                                     | IPI00215901                         | 26,461.00 | 18 | 28 | AVLLGPPGAGK                             | R | G | 979.5937 |
| 382 | AK2 Isoform 1 of Adenylate kinase isoenzyme 2, mitochondrial                                     | IPI00215901                         | 26,461.00 | 18 | 28 | AVLLGPPGAGK                             | R | G | 979.5937 |
| 383 | PDCL3 Phosducin-like protein 3                                                                   | IPI00031629                         | 27,597.50 | 18 | 38 | GILPPKESLKELEEEAE EEEQR                 | K | I | 2,453.24 |
| 384 | PCBP2 poly(rC) binding protein 2 isoform b                                                       | IPI00012066,IPI00790627             | 38,204.50 | 18 | 31 | LLMHGKEVGSII GK                         | R | K | 1,497.85 |
| 385 | PCBP2 poly(rC) binding protein 2 isoform b                                                       | IPI00012066,IPI00790627             | 38,204.50 | 18 | 31 | LLMHGKEVGSII GK                         | R | K | 1,497.85 |
| 386 | PCBP1 Poly(rC)-binding protein 1                                                                 | IPI00016610                         | 37,480.20 | 18 | 31 | LLMHGKEVGSII GK                         | R | K | 1,497.85 |
| 387 | PCBP1 Poly(rC)-binding protein 1                                                                 | IPI00016610                         | 37,480.20 | 18 | 31 | LLMHGKEVGSII GK                         | R | K | 1,497.85 |
| 388 | HNRNPC Isoform C1 of Heterogeneous nuclear ribonucleoproteins C1/C2                              | IPI00216592,IPI00477313,IPI00909232 | 32,320.00 | 18 | 29 | VFIGNLN TLVVK                           | R | K | 1,316.79 |
| 389 | PSMD4 Isoform Rpn10A of 26S proteasome non-ATPase regulatory subunit 4                           | IPI00022694                         | 40,719.20 | 18 | 25 | NGDFLPTR                                | R | L | 919.4633 |
| 390 | EMD Emerin                                                                                       | IPI00032003                         | 28,976.90 | 18 | 32 | RYNIPHG PVVGSTRR                        | R | L | 1,708.94 |
| 391 | KHDRBS1 Isoform 1 of KH domain-containing, RNA-binding, signal transduction-associated protein 1 | IPI00008575,IPI00385834,IPI00479209 | 48,210.20 | 18 | 31 | SGSMDPSGAHPSVR                          | R | Q | 1,400.62 |
| 392 | RPL26 60S ribosomal protein L26                                                                  | IPI00027270                         | 17,240.40 | 18 | 26 | HFNAPSHIR                               | R | R | 1,078.55 |
| 393 | RPL30 60S ribosomal protein L30                                                                  | IPI00219156,IPI00872940             | 12,766.70 | 18 | 23 | LQLVMK                                  | R | S | 731.4485 |
| 394 | SFRS1 Isoform ASF-1 of Splicing factor, arginine/serine-rich 1                                   | IPI00215884                         | 27,727.10 | 18 | 28 | IYVGNLPPDIR                             | R | T | 1,256.70 |
| 395 | ATP1B3 Sodium/potassium-transporting ATPase subunit beta-3                                       | IPI00008167                         | 31,495.70 | 18 | 31 | LFYNP TTGEFLGR                          | K | T | 1,627.85 |
| 396 | ATP1B3 Sodium/potassium-transporting ATPase subunit beta-3                                       | IPI00008167                         | 31,495.70 | 18 | 31 | LFYNP TTGEFLGR                          | K | T | 1,627.85 |
| 397 | ATP1B3 Sodium/potassium-transporting ATPase subunit beta-3                                       | IPI00008167                         | 31,495.70 | 18 | 31 | LFYNP TTGEFLGR                          | K | T | 1,627.85 |

|     |                                                                                                                      |                                                 |           |    |    |                                 |   |   |          |
|-----|----------------------------------------------------------------------------------------------------------------------|-------------------------------------------------|-----------|----|----|---------------------------------|---|---|----------|
| 398 | CUGBP1 Isoform 1 of CUG-BP- and ETR-3-like factor 1                                                                  | IPI00034015,IPI00218388,IPI00218389,IPI00853009 | 52,046.00 | 18 | 25 | MFVQGQVPR                       | K | T | 949.4925 |
| 399 | CENPV Isoform 3 of Proline-rich protein 6                                                                            | IPI00376481                                     | 29,713.00 | 18 | 38 | SGASAAPAASAAAALAPSATR           | R | T | 1,769.91 |
| 400 | PDLIM1 PDZ and LIM domain protein 1                                                                                  | IPI00010414                                     | 36,053.30 | 18 | 32 | LVGGKDFEQPLAISR                 | R | V | 1,629.90 |
| 401 | PAICS phosphoribosylaminoimidazole carboxylase, phosphoribosylaminoimidazole succinocarboxamide synthetase isoform 1 | IPI00815732                                     | 47,941.00 | 18 | 30 | TKEVYELLDSPGK                   | K | V | 1,478.77 |
| 402 | YEATS4 YEATS domain-containing protein 4                                                                             | IPI00008536                                     | 26,482.30 | 18 | 32 | GVTIVKPIVYGNVAR                 | K | Y | 1,585.94 |
| 403 | AASDHPPT L-aminoadipate-semialdehyde dehydrogenase-phosphopantetheinyl transferase                                   | IPI00250297                                     | 35,759.10 | 19 | 30 | WAFSCGTWLPSPR                   | R | A | 1,467.68 |
| 404 | YWHAB Isoform Short of 14-3-3 protein beta/alpha                                                                     | IPI00759832                                     | 27,832.80 | 19 | 27 | YDDMAAAMK                       | R | A | 1,047.41 |
| 405 | YWHAQ 14-3-3 protein theta                                                                                           | IPI00018146                                     | 27,747.40 | 19 | 27 | YDDMATCMK                       | R | A | 1,166.42 |
| 406 | TCEA1 Isoform 1 of Transcription elongation factor A protein 1                                                       | IPI00333215                                     | 33,952.60 | 19 | 29 | KNAAGALDLLK                     | K | E | 1,113.66 |
| 407 | NME2 Nucleoside diphosphate kinase B                                                                                 | IPI00026260                                     | 17,280.20 | 19 | 27 | GLVGEIIKR                       | R | F | 984.6202 |
| 408 | PFDN2 Prefoldin subunit 2                                                                                            | IPI00006052                                     | 16,629.80 | 19 | 32 | GAVSAEQVIAGFNR                  | K | L | 1,418.74 |
| 409 | PBK cDNA FLJ58333, highly similar to T-lymphokine-activated killer cell-originated protein kinase                    | IPI00306708                                     | 37,194.90 | 19 | 37 | SVLCSTPTINIPASPFMQK             | K | L | 2,091.06 |
| 410 | PSMA1 Isoform Short of Proteasome subunit alpha type-1                                                               | IPI00016832,IPI00472442                         | 29,538.00 | 19 | 30 | IHQIEYAMEAVK                    | R | Q | 1,447.73 |
| 411 | EMD Emerin                                                                                                           | IPI00032003                                     | 28,976.90 | 19 | 31 | YNIPHGPPVVGSTR                  | R | R | 1,396.73 |
| 412 | PSMD10 26S proteasome non-ATPase regulatory subunit 10                                                               | IPI00003565,IPI00027699                         | 24,410.20 | 19 | 30 | LEELKESILADK                    | K | S | 1,387.77 |
| 413 | TCP1 T-complex protein 1 subunit alpha                                                                               | IPI00290566                                     | 60,327.20 | 19 | 33 | SQNVMAAASIANIVK                 | R | S | 1,532.81 |
| 414 | TCP1 T-complex protein 1 subunit alpha                                                                               | IPI00290566                                     | 60,327.20 | 19 | 33 | SQNVMAAASIANIVK                 | R | S | 1,532.81 |
| 415 | YWHAZ 14-3-3 protein zeta/delta                                                                                      | IPI00021263                                     | 27,727.90 | 19 | 27 | YDDMAACMK                       | R | S | 1,136.41 |
| 416 | ARL5B ADP-ribosylation factor-like protein 5B                                                                        | IPI00102036                                     | 20,357.10 | 19 | 29 | VIIVGLDNAGK                     | K | T | 1,098.65 |
| 417 | FLOT1 Flotillin-1                                                                                                    | IPI00027438                                     | 47,336.80 | 19 | 28 | SPPVMVAGGR                      | R | V | 970.5139 |
| 418 | SYNGR2 Synaptogyrin-2                                                                                                | IPI00013946,IPI00654744,IPI00789763             | 24,792.20 | 20 | 29 | FLTQPQVVAR                      | R | A | 1,158.66 |
| 419 | UNG Isoform 2 of Uracil-DNA glycosylase                                                                              | IPI00011069                                     | 34,627.40 | 20 | 50 | HAPSPEPAVQGTGVAGVPPEE           | R | A | 2,938.49 |
| 420 | HSPH1 Isoform Beta of Heat shock protein 105 kDa                                                                     | IPI00218993,IPI00513743                         | 92,099.00 | 20 | 33 | SGDAAAIPAKK<br>AGGIETIANEFSDR   | R | C | 1,479.71 |
| 421 | HSPA4 Heat shock 70 kDa protein 4                                                                                    | IPI00002966                                     | 94,313.90 | 20 | 33 | AGGIETIANEYSDR                  | R | C | 1,495.70 |
| 422 | PSMB2 Proteasome subunit beta type-2                                                                                 | IPI00028006                                     | 22,819.50 | 20 | 29 | VAASNIVQMK                      | R | D | 1,076.58 |
| 423 | GSTP1 Glutathione S-transferase P                                                                                    | IPI00219757                                     | 23,338.70 | 20 | 30 | MLLADQGQSWK                     | R | E | 1,292.63 |
| 424 | UCHL1 Ubiquitin carboxyl-terminal hydrolase isozyme L1                                                               | IPI00018352                                     | 24,806.30 | 20 | 27 | LGVAGQWR                        | R | F | 886.4894 |
| 425 | EIF3H Eukaryotic translation initiation factor 3, subunit 3 gamma, 40kDa, isoform CRA_b                              | IPI00647650                                     | 41,563.70 | 20 | 38 | EGTGSTATSSSSTAGAAGK             | K | G | 1,627.74 |
| 426 | TCEB2 Transcription elongation factor B polypeptide 2                                                                | IPI00026670,IPI00410162,IPI00917694             | 13,115.20 | 20 | 29 | ESSTVFELKR                      | K | I | 1,195.63 |
| 427 | TUBB Tubulin beta chain                                                                                              | IPI00011654                                     | 49,652.60 | 20 | 46 | FWEVISDEHGIDPTGTYHGDS           | K | I | 3,102.41 |
| 428 | TUBB Tubulin beta chain                                                                                              | IPI00011654                                     | 49,652.60 | 20 | 46 | DLQLDR<br>FWEVISDEHGIDPTGTYHGDS | K | I | 3,102.41 |
| 429 | TUBB2C Tubulin beta-2C chain                                                                                         | IPI00007752                                     | 49,812.70 | 20 | 46 | DLQLDR<br>FWEVISDEHGIDPTGTYHGDS | K | I | 3,116.42 |
| 430 | UNG Isoform 2 of Uracil-DNA glycosylase                                                                              | IPI00011069                                     | 34,627.40 | 20 | 49 | DLQLER<br>HAPSPEPAVQGTGVAGVPPEE | R | K | 2,810.40 |
| 431 | YWHAE 14-3-3 protein epsilon                                                                                         | IPI00000816                                     | 29,157.00 | 20 | 28 | SGDAAAIPAK<br>YDEMVESMK         | R | K | 1,163.46 |
| 432 | NOSIP Nitric oxide synthase-interacting protein                                                                      | IPI00006408                                     | 33,154.00 | 20 | 34 | KKDTAASGYGTQNIR                 | K | L | 1,609.83 |
| 433 | PMVK Phosphomevalonate kinase                                                                                        | IPI00220648                                     | 21,977.00 | 20 | 32 | SGKDFVTEALQSR                   | K | L | 1,437.73 |
| 434 | TPT1 Translationally-controlled tumor protein                                                                        | IPI00550900                                     | 19,578.20 | 20 | 34 | IREIADGLCLEVEGK                 | K | M | 1,701.88 |
| 435 | DHFR Dihydrofolate reductase                                                                                         | IPI00030357,IPI00887771                         | 21,435.30 | 20 | 29 | NGDLPWPPLR                      | K | N | 1,164.62 |
| 436 | UBA2 SUMO-activating enzyme subunit 2                                                                                | IPI00023234                                     | 71,207.20 | 20 | 34 | VLVVGAGGIGCELLK                 | R | N | 1,484.85 |

|     |                                                                                                                                         |                                                             |           |    |    |                               |   |   |          |
|-----|-----------------------------------------------------------------------------------------------------------------------------------------|-------------------------------------------------------------|-----------|----|----|-------------------------------|---|---|----------|
| 437 | YWHAG 14-3-3 protein gamma                                                                                                              | IPI00220642                                                 | 28,285.10 | 20 | 28 | YDDMAAAMK                     | R | N | 1,047.41 |
| 438 | YWHAG 14-3-3 protein gamma                                                                                                              | IPI00220642                                                 | 28,285.10 | 20 | 42 | YDDMAAAMKNVTELNEPLSN<br>EER   | R | N | 2,672.18 |
| 439 | ARL1 ADP-ribosylation factor-like protein 1                                                                                             | IPI00219518,IPI00908516                                     | 20,400.20 | 20 | 30 | ILILGLDGAGK                   | R | T | 1,069.66 |
| 440 | ARL3 ADP-ribosylation factor-like protein 3                                                                                             | IPI00003327                                                 | 20,438.30 | 20 | 30 | ILLGLDNAGK                    | R | T | 1,126.68 |
| 441 | ARF1 ADP-ribosylation factor 1                                                                                                          | IPI00215914,IPI00215917                                     | 20,679.60 | 20 | 30 | ILMVGLDAAGK                   | R | T | 1,103.61 |
| 442 | ARF4 ADP-ribosylation factor 4                                                                                                          | IPI00215918                                                 | 20,493.60 | 20 | 30 | ILMVGLDAAGK                   | R | T | 1,103.61 |
| 443 | PPIA Peptidyl-prolyl cis-trans isomerase A                                                                                              | IPI00419585,IPI00887678                                     | 17,994.90 | 20 | 31 | VSFELFADKVPK                  | R | T | 1,379.76 |
| 444 | PPIA Peptidyl-prolyl cis-trans isomerase A                                                                                              | IPI00419585,IPI00887678                                     | 17,994.90 | 20 | 31 | VSFELFADKVPK                  | R | T | 1,379.76 |
| 445 | PPIA Peptidyl-prolyl cis-trans isomerase A                                                                                              | IPI00419585,IPI00887678                                     | 17,994.90 | 20 | 28 | VSFELFADK                     | R | V | 1,055.54 |
| 446 | PPIA Peptidyl-prolyl cis-trans isomerase A                                                                                              | IPI00419585,IPI00887678                                     | 17,994.90 | 20 | 28 | VSFELFADK                     | R | V | 1,055.54 |
| 447 | RPS24 Isoform 1 of 40S ribosomal protein S24                                                                                            | IPI00029750,IPI00847986,IPI00903204,IPI00915363,IPI00915463 | 15,405.80 | 21 | 32 | KQMVIDVLHPGK                  | R | A | 1,364.77 |
| 448 | EEF1A2 Elongation factor 1-alpha 2                                                                                                      | IPI00014424                                                 | 50,452.60 | 21 | 30 | STTTGHLIYK                    | K | C | 1,120.60 |
| 449 | EEF1A1 Elongation factor 1-alpha 1                                                                                                      | IPI00396485                                                 | 50,123.20 | 21 | 30 | STTTGHLIYK                    | K | C | 1,120.60 |
| 450 | YIF1B Isoform 3 of Protein YIF1B                                                                                                        | IPI00063544,IPI00735552,IPI00736813                         | 33,948.30 | 21 | 45 | RIPVSQLPMADPHQLFDDTS<br>SAQSR | R | G | 2,756.31 |
| 451 | HNRNPA3 Isoform 1 of Heterogeneous nuclear ribonucleoprotein A3                                                                         | IPI00419373                                                 | 39,577.10 | 21 | 35 | RGEEGHDPKEPEQLR               | R | K | 1,776.86 |
| 452 | PSMA5 Proteasome subunit alpha type-5                                                                                                   | IPI00291922                                                 | 26,393.30 | 21 | 32 | LFQVEYAIEAIK                  | R | L | 1,423.78 |
| 453 | CHAC2 Cation transport regulator-like protein 2                                                                                         | IPI00103047                                                 | 20,857.10 | 21 | 30 | LVGYITNYSR                    | K | R | 1,185.63 |
| 454 | NUDT4;NUDT4P1 Isoform 2 of Diphosphoinositol polyphosphate phosphohydrolase 2                                                           | IPI00021408,IPI00607685                                     | 20,416.00 | 21 | 27 | AACLCFR                       | R | S | 897.407  |
| 455 | ANP32A Acidic leucine-rich nuclear phosphoprotein 32 family member A                                                                    | IPI00025849                                                 | 28,568.10 | 21 | 28 | ELVLDNSR                      | K | S | 945.5    |
| 456 | EEF2 Elongation factor 2                                                                                                                | IPI00186290                                                 | 95,322.10 | 21 | 32 | NMSVIAHVDHGK                  | R | S | 1,323.65 |
| 457 | CCT3 chaperonin containing TCP1, subunit 3 isoform b                                                                                    | IPI00290770,IPI00553185                                     | 60,446.30 | 21 | 31 | KVQSGNINAAK                   | R | T | 1,129.63 |
| 458 | CCT3 chaperonin containing TCP1, subunit 3 isoform b                                                                                    | IPI00290770,IPI00553185                                     | 60,446.30 | 21 | 31 | KVQSGNINAAK                   | R | T | 1,129.63 |
| 459 | CBX3;LOC653972 Chromobox protein homolog 3                                                                                              | IPI00297579                                                 | 20,794.00 | 21 | 34 | KVEEAPEEFVVEK                 | K | V | 1,661.83 |
| 460 | AP3M1 AP-3 complex subunit mu-1                                                                                                         | IPI00032459                                                 | 46,922.00 | 22 | 38 | SVVSQSVCDYFFEAQEK             | K | A | 2,022.91 |
| 461 | BAX Isoform Epsilon of Apoptosis regulator BAX                                                                                          | IPI00071059,IPI00443773,IPI00444945,IPI00845474             | 18,111.40 | 22 | 34 | TGALLLQGFQDR                  | K | A | 1,431.80 |
| 462 | BAX Isoform Epsilon of Apoptosis regulator BAX                                                                                          | IPI00071059,IPI00443773,IPI00444945,IPI00845474             | 18,111.40 | 22 | 34 | TGALLLQGFQDR                  | K | A | 1,431.80 |
| 463 | ADRM1 Proteasomal ubiquitin receptor ADRM1                                                                                              | IPI00033030,IPI00470921                                     | 42,136.20 | 22 | 27 | YLVEFR                        | K | A | 826.4457 |
| 464 | SPC25 Kinetochore protein Spc25                                                                                                         | IPI00010219                                                 | 26,136.20 | 22 | 33 | STDTSCQMAGLR                  | K | D | 1,342.57 |
| 465 | - Putative uncharacterized protein ENSP00000348237                                                                                      | IPI00453476,IPI00549725                                     | 28,832.80 | 22 | 40 | FSGWYDADLSPAGHEEAKR           | R | G | 2,135.98 |
| 466 | RPL21;LOC729402 60S ribosomal protein L21                                                                                               | IPI00247583,IPI00887074,IPI00888913                         | 18,547.00 | 22 | 32 | HGVVPLATYMR                   | K | I | 1,243.66 |
| 467 | LOC728825 SMT3 suppressor of mif two 3 homolog 2 isoform b precursor                                                                    | IPI00140827,IPI00299149,IPI00745893,IPI00790142             | 10,821.10 | 22 | 33 | VAGQDGSVVQFK                  | K | I | 1,234.64 |
| 468 | LOC728825 SMT3 suppressor of mif two 3 homolog 2 isoform b precursor                                                                    | IPI00140827,IPI00299149,IPI00745893,IPI00790142             | 10,821.10 | 22 | 33 | VAGQDGSVVQFK                  | K | I | 1,234.64 |
| 469 | SRP14 Signal recognition particle 14 kDa protein                                                                                        | IPI00293434                                                 | 14,552.60 | 22 | 31 | TSGSVYITLK                    | R | K | 1,068.59 |
| 470 | RAB7A Ras-related protein Rab-7a                                                                                                        | IPI00016342                                                 | 23,472.00 | 22 | 31 | TSLMNQYVVK                    | K | K | 1,197.59 |
| 471 | RPL13 60S ribosomal protein L13                                                                                                         | IPI00465361                                                 | 24,244.20 | 22 | 31 | VATWFNQPAP                    | R | K | 1,189.61 |
| 472 | NOSIP Nitric oxide synthase-interacting protein                                                                                         | IPI00006408                                                 | 33,154.00 | 22 | 34 | DTAASGYGTQNR                  | K | L | 1,353.64 |
| 473 | BUB3 Mitotic checkpoint protein BUB3                                                                                                    | IPI00013468,IPI00514701,IPI00644108                         | 37,136.70 | 22 | 40 | FSPNTSQFLLVSSWDTSVR           | K | L | 2,171.08 |
| 474 | TPT1 Translationally-controlled tumor protein                                                                                           | IPI00550900                                                 | 19,578.20 | 22 | 34 | EIADGLCLEVEGK                 | R | M | 1,432.70 |
| 475 | PHGDH D-3-phosphoglycerate dehydrogenase                                                                                                | IPI00011200                                                 | 56,632.60 | 22 | 33 | ILQDGGQLQVVEK                 | K | Q | 1,298.73 |
| 476 | - Putative uncharacterized protein ENSP00000348237                                                                                      | IPI00453476,IPI00549725                                     | 28,832.80 | 22 | 39 | FSGWYDADLSPAGHEEAK            | R | R | 1,979.88 |
| 477 | HIST1H4H;HIST2H4A;HIST4H4;HIST1H4F;HIST1H4D;HIST1H4K;HIST1H4C;HIST1H4J;HIST1H4A;HIST1H4I;HIST1H4B;HIST2H4B;HIST1H4E;HIST1H4I Histone H4 | IPI00453473                                                 | 11,349.70 | 22 | 36 | VLRDNIQGITKPAIR               | K | R | 1,694.01 |

|     |                                                                                                                                         |                                                                                                                                                 |           |    |    |                        |   |   |          |
|-----|-----------------------------------------------------------------------------------------------------------------------------------------|-------------------------------------------------------------------------------------------------------------------------------------------------|-----------|----|----|------------------------|---|---|----------|
| 478 | HIST1H4H;HIST2H4A;HIST4H4;HIST1H4F;HIST1H4D;HIST1H4K;HIST1H4C;HIST1H4J;HIST1H4A;HIST1H4I;HIST1H4B;HIST2H4B;HIST1H4E;HIST1H4I Histone H4 | IP100453473                                                                                                                                     | 11,349.70 | 22 | 36 | VLRDNIQGITKPAIR        | K | R | 1,694.01 |
| 479 | HIST1H4H;HIST2H4A;HIST4H4;HIST1H4F;HIST1H4D;HIST1H4K;HIST1H4C;HIST1H4J;HIST1H4A;HIST1H4I;HIST1H4B;HIST2H4B;HIST1H4E;HIST1H4I Histone H4 | IP100453473                                                                                                                                     | 11,349.70 | 22 | 36 | VLRDNIQGITKPAIR        | K | R | 1,694.01 |
| 480 | HIST1H4H;HIST2H4A;HIST4H4;HIST1H4F;HIST1H4D;HIST1H4K;HIST1H4C;HIST1H4J;HIST1H4A;HIST1H4I;HIST1H4B;HIST2H4B;HIST1H4E;HIST1H4I Histone H4 | IP100453473                                                                                                                                     | 11,349.70 | 22 | 36 | VLRDNIQGITKPAIR        | K | R | 1,694.01 |
| 481 | HNRNP K Isoform 1 of Heterogeneous nuclear ribonucleoprotein K                                                                          | IP100216049,IP100216746,IP100807545,IP100910458                                                                                                 | 50,960.50 | 22 | 35 | RPAEDMEEEEQAFKR        | K | S | 1,751.80 |
| 482 | HIST1H2AB;HIST1H2AE Histone H2A type 1-B/E                                                                                              | IP100026272,IP100031562,IP100216456                                                                                                             | 14,118.00 | 22 | 30 | AGLQFPVGR              | R | V | 944.5313 |
| 483 | HIST1H2AB;HIST1H2AE Histone H2A type 1-B/E                                                                                              | IP100026272,IP100031562,IP100216456                                                                                                             | 14,118.00 | 22 | 30 | AGLQFPVGR              | R | V | 944.5313 |
| 484 | HIST1H2AB;HIST1H2AE Histone H2A type 1-B/E                                                                                              | IP100026272,IP100031562,IP100216456                                                                                                             | 14,118.00 | 22 | 30 | AGLQFPVGR              | R | V | 944.5313 |
| 485 | HIST1H2AH Histone H2A type 1-H                                                                                                          | IP100081836,IP100216457,IP100220855,IP100255316,IP100291764,IP100339274,IP100552873,IP100902514                                                 | 13,888.80 | 22 | 30 | AGLQFPVGR              | R | V | 944.5313 |
| 486 | HIST1H2AH Histone H2A type 1-H                                                                                                          | IP100081836,IP100216457,IP100220855,IP100255316,IP100291764,IP100339274,IP100552873,IP100902514                                                 | 13,888.80 | 22 | 30 | AGLQFPVGR              | R | V | 944.5313 |
| 487 | DCXR L-xylulose reductase                                                                                                               | IP100448095,IP100797249                                                                                                                         | 25,894.20 | 22 | 33 | GTVQALHATGAR           | R | V | 1,181.64 |
| 488 | CBX3;LOC653972 Chromobox protein homolog 3                                                                                              | IP100297579                                                                                                                                     | 20,794.00 | 22 | 34 | VEEAPEEEFVVEK          | K | V | 1,533.73 |
| 489 | ATIC Bifunctional purine biosynthesis protein PURH                                                                                      | IP100289499                                                                                                                                     | 64,598.50 | 23 | 39 | NLTALGLNLVASGGTAK      | R | A | 1,599.91 |
| 490 | AP3S2 AP-3 complex subunit sigma-2                                                                                                      | IP100025115                                                                                                                                     | 21,999.80 | 23 | 33 | FPEEIQQQIVR            | R | E | 1,386.74 |
| 491 | FAM96B UPF0195 protein FAM96B                                                                                                           | IP100007024                                                                                                                                     | 17,644.70 | 23 | 44 | SGERPVTAGEEDEQVPDSIDAR | R | E | 2,357.09 |
| 492 | GNB1 Guanine nucleotide-binding protein G(I)/G(S)/G(T) subunit beta-1                                                                   | IP100026268                                                                                                                                     | 37,359.50 | 23 | 42 | KACADATLSQITNNIDPVGR   | R | I | 2,144.08 |
| 493 | CDK2 Cell division protein kinase 2                                                                                                     | IP100031681                                                                                                                                     | 33,912.70 | 23 | 34 | NKLTGEVVALKK           | R | I | 1,299.80 |
| 494 | CDK2 Cell division protein kinase 2                                                                                                     | IP100031681                                                                                                                                     | 33,912.70 | 23 | 34 | NKLTGEVVALKK           | R | I | 1,299.80 |
| 495 | NAPA Alpha-soluble NSF attachment protein                                                                                               | IP100009253                                                                                                                                     | 33,216.10 | 23 | 37 | NSQSFFSGLFGGSSK        | K | I | 1,549.73 |
| 496 | NAPA Alpha-soluble NSF attachment protein                                                                                               | IP100009253                                                                                                                                     | 33,216.10 | 23 | 37 | NSQSFFSGLFGGSSK        | K | I | 1,549.73 |
| 497 | NP cDNA FLJ25678 fis, clone TST04067, highly similar to PURINE NUCLEOSIDE PHOSPHORYLASE SERPINH1 Serpin H1                              | IP100017672,IP100871140                                                                                                                         | 32,533.50 | 23 | 41 | HRPQVAIICGSLGGLTDK     | K | L | 1,979.05 |
| 498 | HMOX1 Heme oxygenase 1                                                                                                                  | IP100032140                                                                                                                                     | 46,424.00 | 23 | 35 | KPAAAAAPGTAEK          | K | L | 1,182.65 |
| 499 | CAMK2G Isoform 4 of Calcium/calmodulin-dependent protein kinase type II gamma chain                                                     | IP100215893                                                                                                                                     | 32,801.10 | 23 | 35 | EVHTQAENAEFMR          | K | N | 1,577.70 |
| 500 | CAMK2D Isoform Delta 6 of Calcium/calmodulin-dependent protein kinase type II delta chain                                               | IP100172450,IP100172452,IP100296678,IP100334344,IP100336118,IP100556423,IP100646849,IP100908444,IP100915309,IP100915327,IP100915383,IP100915393 | 59,589.60 | 23 | 29 | GAFSVVR                | K | R | 735.4147 |
| 501 | NHP2 H/ACA ribonucleoprotein complex subunit 2                                                                                          | IP100172636,IP100430291,IP100827573,IP100827625,IP100876923                                                                                     | 54,111.10 | 23 | 29 | GAFSVVR                | K | R | 735.4147 |
| 502 | RAB5B Ras-related protein Rab-5B                                                                                                        | IP100041325,IP100654617                                                                                                                         | 17,183.10 | 23 | 41 | TYQELLVNQNPQAQPLASR    | R | R | 2,155.15 |
| 503 | CDK5 Cell division protein kinase 5                                                                                                     | IP100017344,IP100908835                                                                                                                         | 23,688.90 | 23 | 33 | LVLGSAVVGK             | K | S | 1,085.66 |
| 504 | ACTR1A Alpha-centractin                                                                                                                 | IP100023530                                                                                                                                     | 33,287.80 | 23 | 34 | NRETHEIVALKR           | K | V | 1,465.82 |
| 505 | RBMX Heterogeneous nuclear ribonucleoprotein G                                                                                          | IP100029468,IP100908883                                                                                                                         | 42,597.20 | 23 | 32 | AGFAGDQIPK             | K | Y | 1,003.52 |
| 506 | RBMX Heterogeneous nuclear ribonucleoprotein G                                                                                          | IP100304692                                                                                                                                     | 42,315.70 | 23 | 30 | ALEAVFGK               | K | Y | 834.472  |
| 507 | PDE12 Isoform 1 of 2',5'-phosphodiesterase 12                                                                                           | IP100304692                                                                                                                                     | 42,315.70 | 23 | 30 | ALEAVFGK               | K | Y | 834.472  |
| 508 | HEBP1 Heme-binding protein 1                                                                                                            | IP100174390,IP100886797                                                                                                                         | 67,333.70 | 24 | 37 | AEAGSQTAAGAMER         | R | A | 1,365.61 |
| 509 | RPL14 Ribosomal protein L14 variant                                                                                                     | IP100148063                                                                                                                                     | 21,079.40 | 24 | 34 | GDKEEVAYEER            | K | A | 1,324.60 |
| 510 | PSMD6 26S proteasome non-ATPase regulatory subunit 6                                                                                    | IP100555744                                                                                                                                     | 23,769.70 | 24 | 35 | LVAIVDVIDQNR           | K | A | 1,354.77 |
| 511 | PSMB4 Proteasome subunit beta type-4                                                                                                    | IP100014151                                                                                                                                     | 45,515.40 | 24 | 32 | FLLSLPEHR              | R | G | 1,111.63 |
| 512 | RPS12 40S ribosomal protein S12                                                                                                         | IP100555956                                                                                                                                     | 29,187.00 | 24 | 40 | IPSTPDSFMDPASALYR      | R | G | 1,883.88 |
| 513 | RPL9 60S ribosomal protein L9                                                                                                           | IP100013917,IP100847579                                                                                                                         | 14,507.70 | 24 | 33 | TALIHDLGLAR            | K | G | 1,066.60 |
| 514 | RAN GTP-binding nuclear protein Ran                                                                                                     | IP100031691                                                                                                                                     | 21,845.70 | 24 | 31 | TVIVKQPR               | R | G | 869.5568 |
| 515 |                                                                                                                                         | IP100643041,IP100795671                                                                                                                         | 24,405.10 | 24 | 29 | TTFVKR                 | K | H | 751.4461 |

|     |                                                                                                                                         |                                     |           |    |    |                       |   |   |          |
|-----|-----------------------------------------------------------------------------------------------------------------------------------------|-------------------------------------|-----------|----|----|-----------------------|---|---|----------|
| 516 | RPL31 60S ribosomal protein L31                                                                                                         | IPI00026302                         | 14,445.20 | 24 | 32 | EYTIHHR               | R | I | 1,173.64 |
| 517 | RPL7 60S ribosomal protein L7                                                                                                           | IPI00030179,IPI00472171,IPI00871827 | 29,209.70 | 24 | 29 | NFAELK                | R | I | 721.3879 |
| 518 | H1FX Histone H1x                                                                                                                        | IPI00021924                         | 22,469.90 | 24 | 34 | AGGSAALSPSK           | K | K | 945.5    |
| 519 | KIAA0101 PCNA-associated factor                                                                                                         | IPI00014147,IPI00790491,IPI00792465 | 11,968.50 | 24 | 41 | KVLGSSTSATNSTSVSSR    | R | K | 1,768.90 |
| 520 | CHCHD2 Coiled-coil-helix-coiled-coil-helix domain-containing protein 2, mitochondrial                                                   | IPI00007673,IPI00872610             | 15,494.30 | 24 | 51 | AAPRPAPVAQPPAAAPPSAV  | R | Q | 2,533.36 |
| 521 | CHCHD2 Coiled-coil-helix-coiled-coil-helix domain-containing protein 2, mitochondrial                                                   | IPI00007673,IPI00872610             | 15,494.30 | 24 | 51 | AAPRPAPVAQPPAAAPPSAV  | R | Q | 2,533.36 |
| 522 | CALD1 Isoform 5 of Caldesmon                                                                                                            | IPI00333771                         | 61,195.30 | 24 | 35 | NDDDEEEAARER          | R | R | 1,448.59 |
| 523 | RAB5C Ras-related protein Rab-5C                                                                                                        | IPI00016339                         | 23,464.70 | 24 | 34 | LVLGSAVAVGK           | K | S | 1,085.66 |
| 524 | PSMC2 26S protease regulatory subunit 7                                                                                                 | IPI00021435                         | 48,617.60 | 24 | 34 | ALDEGDIALLK           | R | T | 1,157.64 |
| 525 | RPS17 40S ribosomal protein S17                                                                                                         | IPI00221093                         | 15,532.50 | 24 | 33 | LGDNFHTNKR            | R | V | 1,201.61 |
| 526 | LAGE3 L antigen family member 3                                                                                                         | IPI00032314                         | 14,785.70 | 25 | 47 | GGVDTAAAPAGGAPPAHAPG  | R | D | 1,951.97 |
| 527 | PHB2 Prohibitin-2                                                                                                                       | IPI00027252                         | 33,279.60 | 25 | 37 | LLLGAAGAVAYGVR        | K | E | 1,259.75 |
| 528 | ZNF593 zinc finger protein 593                                                                                                          | IPI00026276,IPI00844193             | 15,181.40 | 25 | 33 | RPDLDEIHR             | R | E | 1,150.60 |
| 529 | COPG2 Coatomer subunit gamma-2                                                                                                          | IPI00002557                         | 97,606.50 | 25 | 32 | SAVLQEAR              | K | I | 873.4788 |
| 530 | PSME1 Proteasome activator complex subunit 1                                                                                            | IPI00479722,IPI00748256             | 28,705.80 | 25 | 35 | TENLLGSYFPK           | K | K | 1,268.65 |
| 531 | DCUN1D1 DCN1-like protein 1                                                                                                             | IPI00291893,IPI00749447,IPI00910838 | 30,107.90 | 25 | 36 | TAVSCLSQNDWK          | K | L | 1,408.65 |
| 532 | EEF1D Elongation factor 1-delta                                                                                                         | IPI00023048                         | 31,103.90 | 25 | 38 | FYEQMNGPVAGASR        | R | Q | 1,526.71 |
| 533 | SNF8 Isoform 1 of Vacuolar-sorting protein SNF8                                                                                         | IPI00101524,IPI00640699             | 28,846.90 | 25 | 38 | GTVLAEDQLAQMSK        | R | Q | 1,506.75 |
| 534 | HIST1H4H;HIST2H4A;HIST4H4;HIST1H4F;HIST1H4D;HIST1H4K;HIST1H4C;HIST1H4J;HIST1H4A;HIST1H4I;HIST1H4B;HIST2H4B;HIST1H4E;HIST1H4I Histone H4 | IPI00453473                         | 11,349.70 | 25 | 36 | DNIQGITKPAIR          | R | R | 1,325.75 |
| 535 | HIST1H4H;HIST2H4A;HIST4H4;HIST1H4F;HIST1H4D;HIST1H4K;HIST1H4C;HIST1H4J;HIST1H4A;HIST1H4I;HIST1H4B;HIST2H4B;HIST1H4E;HIST1H4I Histone H4 | IPI00453473                         | 11,349.70 | 25 | 36 | DNIQGITKPAIR          | R | R | 1,325.75 |
| 536 | HIST1H4H;HIST2H4A;HIST4H4;HIST1H4F;HIST1H4D;HIST1H4K;HIST1H4C;HIST1H4J;HIST1H4A;HIST1H4I;HIST1H4B;HIST2H4B;HIST1H4E;HIST1H4I Histone H4 | IPI00453473                         | 11,349.70 | 25 | 36 | DNIQGITKPAIR          | R | R | 1,325.75 |
| 537 | HIST1H4H;HIST2H4A;HIST4H4;HIST1H4F;HIST1H4D;HIST1H4K;HIST1H4C;HIST1H4J;HIST1H4A;HIST1H4I;HIST1H4B;HIST2H4B;HIST1H4E;HIST1H4I Histone H4 | IPI00453473                         | 11,349.70 | 25 | 36 | DNIQGITKPAIR          | R | R | 1,325.75 |
| 538 | HNRNPA0 Heterogeneous nuclear ribonucleoprotein A0                                                                                      | IPI00011913                         | 30,822.50 | 25 | 46 | GHFEAFGTLTDCVVVNPQT   | R | S | 2,475.25 |
| 539 | OLA1 Isoform 1 of Olg-like ATPase 1                                                                                                     | IPI00290416,IPI00916847             | 44,727.40 | 25 | 35 | IGIVGLPNVGK           | K | S | 1,066.66 |
| 540 | NPM1 Isoform 2 of Nucleophosmin                                                                                                         | IPI00220740,IPI00549248             | 29,446.90 | 25 | 45 | ADKDYHFKVDNDENEHQLSL  | K | T | 2,573.20 |
| 541 | RPLP2 60S acidic ribosomal protein P2                                                                                                   | IPI00008529                         | 11,647.40 | 25 | 41 | KILDSVGEADDDRLNK      | K | V | 1,901.00 |
| 542 | COPG Coatomer subunit gamma                                                                                                             | IPI00783982                         | 97,701.40 | 25 | 32 | SAVLQEAR              | K | V | 873.4788 |
| 543 | AURKA Serine/threonine-protein kinase 6                                                                                                 | IPI00298940                         | 45,791.80 | 25 | 46 | VLVTQQFPQCNPLPVNSGQA  | R | V | 2,481.27 |
| 544 | PFKP 6-phosphofructokinase type C                                                                                                       | IPI00009790                         | 85,579.40 | 26 | 44 | AIGVLTSGGDAQGMNAAVR   | K | A | 1,803.90 |
| 545 | TSTA3 GDP-L-fucose synthetase                                                                                                           | IPI00014361,IPI00791788,IPI00909958 | 35,874.60 | 26 | 44 | VVADGAGLPGEDWVVFSSK   | K | D | 1,932.97 |
| 546 | RFC5 Replication factor C subunit 5                                                                                                     | IPI00031514,IPI00373883             | 38,480.40 | 26 | 46 | YRPQTLNDLISHQDILSTIQK | K | F | 2,483.33 |
| 547 | MRPL11 39S ribosomal protein L11, mitochondrial                                                                                         | IPI00007001,IPI00333848             | 20,665.90 | 26 | 42 | AGLAMPGPPLGPVLGQR     | R | G | 1,646.91 |
| 548 | RNASEH2A Ribonuclease H2 subunit A                                                                                                      | IPI00290192                         | 33,377.00 | 26 | 38 | KEPCVLGVDEAGR         | R | G | 1,429.71 |
| 549 | DDX5 Probable ATP-dependent RNA helicase DDX5                                                                                           | IPI00017617                         | 69,131.70 | 26 | 32 | AGPLSGK               | R | K | 629.3618 |
| 550 | DBR1 Isoform 1 of Lariat debranching enzyme                                                                                             | IPI00305545                         | 61,538.00 | 26 | 44 | RGPVLDLLCCGDFQAVR     | R | N | 2,130.06 |
| 551 | RPL7A 60S ribosomal protein L7a                                                                                                         | IPI00299573                         | 29,978.30 | 26 | 34 | KVVNPLFEK             | K | R | 1,073.64 |
| 552 | C1orf174 UPF0688 protein C1orf174                                                                                                       | IPI00844507,IPI00852747,IPI00872784 | 25,958.80 | 26 | 39 | LASAEVAGSTSAK         | R | T | 1,319.68 |

|     |                                                                         |                                                 |           |    |    |                       |   |   |          |
|-----|-------------------------------------------------------------------------|-------------------------------------------------|-----------|----|----|-----------------------|---|---|----------|
| 553 | PSMD4 Isoform Rpn10A of 26S proteasome non-ATPase regulatory subunit 4  | IPI00022694                                     | 40,719.20 | 26 | 40 | LQAQQDAVNIVCHSK       | R | T | 1,710.86 |
| 554 | HSPA8 Isoform 1 of Heat shock cognate 71 kDa protein                    | IPI00003865                                     | 70,881.80 | 26 | 36 | VEIANDQGNR            | K | T | 1,228.63 |
| 555 | HSPA1A;HSPA1B Heat shock 70 kDa protein 1                               | IPI00304925                                     | 70,036.00 | 26 | 36 | VEIANDQGNR            | K | T | 1,228.63 |
| 556 | HSPA1A;HSPA1B Heat shock 70 kDa protein 1                               | IPI00304925                                     | 70,036.00 | 26 | 36 | VEIANDQGNR            | K | T | 1,228.63 |
| 557 | HSPA1A;HSPA1B Heat shock 70 kDa protein 1                               | IPI00304925                                     | 70,036.00 | 26 | 36 | VEIANDQGNR            | K | T | 1,228.63 |
| 558 | HSPA1A;HSPA1B Heat shock 70 kDa protein 1                               | IPI00304925                                     | 70,036.00 | 26 | 36 | VEIANDQGNR            | K | T | 1,228.63 |
| 559 | HSPA1A;HSPA1B Heat shock 70 kDa protein 1                               | IPI00304925                                     | 70,036.00 | 26 | 36 | VEIANDQGNR            | K | T | 1,228.63 |
| 560 | HSPA1A;HSPA1B Heat shock 70 kDa protein 1                               | IPI00304925                                     | 70,036.00 | 26 | 36 | VEIANDQGNR            | K | T | 1,228.63 |
| 561 | HSPA1A;HSPA1B Heat shock 70 kDa protein 1                               | IPI00304925                                     | 70,036.00 | 26 | 36 | VEIANDQGNR            | K | T | 1,228.63 |
| 562 | - cDNA FLJ54408, highly similar to Heat shock 70 kDa protein 1          | IPI00911039                                     | 63,907.90 | 26 | 36 | VEIANDQGNR            | K | T | 1,228.63 |
| 563 | RPLP2 60S acidic ribosomal protein P2                                   | IPI00008529                                     | 11,647.40 | 26 | 41 | ILDSVGIEADDDRLNK      | K | V | 1,772.90 |
| 564 | COMMD8 COMM domain-containing protein 8                                 | IPI00016447,IPI00871891                         | 21,072.90 | 27 | 34 | IIDGICGR              | K | A | 903.4719 |
| 565 | MYL6B;MYL6 Isoform Non-muscle of Myosin light polypeptide 6             | IPI00335168,IPI00789605,IPI00796366             | 16,911.80 | 27 | 37 | ILYSQCGDVMR           | K | A | 1,341.63 |
| 566 | GRB2 Isoform 1 of Growth factor receptor-bound protein 2                | IPI00021327                                     | 25,188.80 | 27 | 38 | VLNEECDQNWYK          | K | A | 1,597.70 |
| 567 | GRB2 Isoform 1 of Growth factor receptor-bound protein 2                | IPI00021327                                     | 25,188.80 | 27 | 44 | VLNEECDQNWYKAEIENGK   | K | D | 2,210.02 |
| 568 | TSN Translin                                                            | IPI00018768,IPI00917623                         | 26,165.40 | 27 | 36 | VVQSLEQTAR            | K | E | 1,130.62 |
| 569 | CD2BP2 CD2 antigen cytoplasmic tail-binding protein 2                   | IPI00006103                                     | 37,629.20 | 27 | 40 | LVDPVAGSGGPGSR        | K | F | 1,268.66 |
| 570 | PPP1CA Serine/threonine-protein phosphatase PP1-alpha catalytic subunit | IPI00550451                                     | 37,495.90 | 27 | 36 | NVQLTENEIR            | K | G | 1,215.63 |
| 571 | UBE2M NEDD8-conjugating enzyme Ubc12                                    | IPI00022597                                     | 20,882.90 | 27 | 33 | ASAAQLR               | K | I | 716.4049 |
| 572 | KPNA1 Importin subunit alpha-1                                          | IPI00303292                                     | 60,232.00 | 27 | 36 | RREEEGLQLR            | R | K | 1,285.70 |
| 573 | PM20D2 Peptidase M20 domain-containing protein 2                        | IPI00217852                                     | 47,758.70 | 27 | 37 | SAECIDEAAER           | R | L | 1,250.53 |
| 574 | POLD2 DNA polymerase delta subunit 2                                    | IPI00025616,IPI00909525                         | 51,272.00 | 27 | 40 | VPVATYTNSSQPFR        | R | L | 1,566.79 |
| 575 | IGF2BP2 insulin-like growth factor 2 mRNA binding protein 2 isoform a   | IPI00179713,IPI00180983,IPI00743914             | 66,104.40 | 27 | 37 | KLPLAGQVLLK           | R | S | 1,179.78 |
| 576 | SEH1L Isoform A of Nucleoporin SEH1-like                                | IPI00185533,IPI00220609                         | 39,630.00 | 27 | 37 | MATCSSDQSVK           | R | V | 1,213.52 |
| 577 | RDH11 Isoform 1 of Retinol dehydrogenase 11                             | IPI00339384                                     | 35,368.50 | 27 | 42 | MLSSGVCTSTVQLPGK      | K | V | 1,680.83 |
| 578 | ATP5O ATP synthase subunit O, mitochondrial                             | IPI00007611                                     | 23,259.40 | 27 | 40 | LVRPPVQVYGIEGR        | K | Y | 1,582.91 |
| 579 | RPL24 60S ribosomal protein L24                                         | IPI00306332,IPI00791426,IPI00793696,IPI00873403 | 17,761.50 | 28 | 35 | VFQFLNAK              | K | C | 966.5407 |
| 580 | GSTZ1 glutathione transferase zeta 1 isoform 2                          | IPI00157928,IPI00556579,IPI00874143             | 19,355.70 | 28 | 40 | GIDYETVPINLIK         | K | D | 1,474.82 |
| 581 | CBR1 Carbonyl reductase [NADPH] 1                                       | IPI00295386                                     | 30,356.80 | 28 | 38 | LFSGDVVLTAR           | R | D | 1,177.66 |
| 582 | EIF5A Isoform 1 of Eukaryotic translation initiation factor 5A-1        | IPI00411704,IPI00855924                         | 16,814.70 | 28 | 34 | NGFVVVK               | K | G | 776.4665 |
| 583 | PSMB3 Proteasome subunit beta type-3                                    | IPI00028004                                     | 22,931.60 | 28 | 41 | FGIQAQMVTDFQK         | R | I | 1,629.79 |
| 584 | HMGN2 Non-histone chromosomal protein HMG-17                            | IPI00217950                                     | 9,375.10  | 28 | 42 | LSAKPAPPKPEPKPK       | R | K | 1,584.95 |
| 585 | HMGN2 Non-histone chromosomal protein HMG-17                            | IPI00217950                                     | 9,375.10  | 28 | 42 | LSAKPAPPKPEPKPK       | R | K | 1,584.95 |
| 586 | STMN1 Stathmin                                                          | IPI00479997                                     | 17,285.00 | 28 | 41 | SKESVPEFPLSPPK        | R | K | 1,541.82 |
| 587 | FKBP3 FK506-binding protein 3                                           | IPI00024157                                     | 25,159.40 | 28 | 42 | FLQEHGSDSFLAEHK       | K | L | 1,744.83 |
| 588 | RPS19 40S ribosomal protein S19                                         | IPI00215780                                     | 16,042.50 | 28 | 38 | LKVPEWVDTVK           | K | L | 1,313.75 |
| 589 | RPS13 40S ribosomal protein S13                                         | IPI00221089                                     | 17,205.30 | 28 | 39 | LTSDDVKEQIYK          | K | L | 1,438.74 |
| 590 | WARS Tryptophanyl-tRNA synthetase, cytoplasmic                          | IPI00295400                                     | 53,149.60 | 28 | 41 | AGNASKDEIDSAVK        | K | M | 1,404.70 |
| 591 | YWHAQ 14-3-3 protein theta                                              | IPI00018146                                     | 27,747.40 | 28 | 41 | AVTEQGAELSNEER        | K | N | 1,532.72 |
| 592 | YWHAQ 14-3-3 protein theta                                              | IPI00018146                                     | 27,747.40 | 28 | 49 | AVTEQGAELSNEERNLLSVAY | K | N | 2,421.23 |
| 593 | YWHAB Isoform Short of 14-3-3 protein beta/alpha                        | IPI00759832                                     | 27,832.80 | 28 | 41 | AVTEQGHLSNEER         | K | N | 1,598.74 |
| 594 | YWHAZ 14-3-3 protein zeta/delta                                         | IPI00021263                                     | 27,727.90 | 28 | 41 | SVTEQGAELSNEER        | K | N | 1,548.71 |
| 595 | PSMC5 26S protease regulatory subunit 8                                 | IPI00023919,IPI00745502                         | 45,609.10 | 28 | 38 | IEELQLIVNDK           | K | S | 1,313.73 |

|     |                                                                               |                                                                                                                                                                                                                                                                         |            |    |    |                         |   |   |          |
|-----|-------------------------------------------------------------------------------|-------------------------------------------------------------------------------------------------------------------------------------------------------------------------------------------------------------------------------------------------------------------------|------------|----|----|-------------------------|---|---|----------|
| 596 | SAR1A GTP-binding protein SAR1a                                               | IPI00015954                                                                                                                                                                                                                                                             | 22,349.70  | 28 | 38 | LVFLGLDNAGK             | K | T | 1,146.65 |
| 597 | KPNB1 Importin subunit beta-1                                                 | IPI00001639                                                                                                                                                                                                                                                             | 97,153.30  | 28 | 42 | AAVENLPTFLVELSR         | R | V | 1,658.91 |
| 598 | RPS3 40S ribosomal protein S3                                                 | IPI00011253                                                                                                                                                                                                                                                             | 26,670.50  | 28 | 40 | ELAEDGYSGVEVR           | R | V | 1,423.67 |
| 599 | RPS3 40S ribosomal protein S3                                                 | IPI00011253                                                                                                                                                                                                                                                             | 26,670.50  | 28 | 40 | ELAEDGYSGVEVR           | R | V | 1,423.67 |
| 600 | THEM2 Thioesterase superfamily member 2                                       | IPI00020530                                                                                                                                                                                                                                                             | 14,942.60  | 28 | 37 | ITLVSAAPGK              | K | V | 956.5776 |
| 601 | PRDX1 Peroxiredoxin-1                                                         | IPI00000874                                                                                                                                                                                                                                                             | 22,092.90  | 28 | 37 | DISLSDYK GK             | K | Y | 1,125.58 |
| 602 | NUDT4;NUDT4P1 Isoform 2 of Diphosphoinositol polyphosphate phosphohydrolase 2 | IPI00021408,IPI00607685                                                                                                                                                                                                                                                 | 20,416.00  | 28 | 41 | SEQEDEVLLVSSSR          | R | Y | 1,577.77 |
| 603 | RPS23 40S ribosomal protein S23                                               | IPI00218606                                                                                                                                                                                                                                                             | 15,789.70  | 29 | 37 | KAHLGTALK               | K | A | 938.5783 |
| 604 | PSMD9 Isoform p27-L of 26S proteasome non-ATPase regulator subunit 9          | IPI00010860,IPI00216220,IPI00791380                                                                                                                                                                                                                                     | 24,635.20  | 29 | 38 | RKEEIEAQIK              | R | A | 1,243.70 |
| 605 | PARK7 Protein DJ-1                                                            | IPI00298547                                                                                                                                                                                                                                                             | 19,873.10  | 29 | 48 | AGIKVTVAGLAGKDPVQCSR    | R | D | 2,027.11 |
| 606 | EIF2B1 Translation initiation factor eIF-2B subunit alpha                     | IPI00221300                                                                                                                                                                                                                                                             | 33,695.20  | 29 | 36 | TLLEFLKR                | R | D | 1,019.62 |
| 607 | NUBP2 Nucleotide-binding protein 2                                            | IPI00644674,IPI00872338                                                                                                                                                                                                                                                 | 28,807.30  | 29 | 40 | STISTELALALR            | K | H | 1,274.73 |
| 608 | FLOT1 Flotillin-1                                                             | IPI00027438                                                                                                                                                                                                                                                             | 47,336.80  | 29 | 40 | VFVLPCIQQIQR            | R | I | 1,500.84 |
| 609 | TRIP13 Isoform 1 of Thyroid receptor-interacting protein 13                   | IPI00003505                                                                                                                                                                                                                                                             | 48,534.10  | 29 | 43 | GSSTAKKEDINLSVR         | R | K | 1,604.86 |
| 610 | MTHFD1 C-1-tetrahydrofolate synthase, cytoplasmic                             | IPI00218342,IPI00794900                                                                                                                                                                                                                                                 | 101,543.50 | 29 | 37 | EQVPGFTPR               | K | L | 1,030.53 |
| 611 | UCHL5 Isoform 2 of Ubiquitin carboxyl-terminal hydrolase isozyme L5           | IPI00219512,IPI00219513,IPI00299313,IPI00549820,IPI00549849,IPI00641843,IPI00642374                                                                                                                                                                                     | 36,061.70  | 29 | 45 | GAQVEEWSLEPENFEK        | R | L | 2,004.96 |
| 612 | ALDOA Fructose-bisphosphate aldolase A                                        | IPI00465439                                                                                                                                                                                                                                                             | 39,402.60  | 29 | 43 | GILAADESTGSIKR          | K | L | 1,488.80 |
| 613 | ALG13 UDP-N-acetylglucosamine transferase subunit ALG13 homolog               | IPI00020512                                                                                                                                                                                                                                                             | 18,207.50  | 29 | 36 | IESLGYNR                | K | L | 951.4894 |
| 614 | YWHAH 14-3-3 protein eta                                                      | IPI00216319                                                                                                                                                                                                                                                             | 28,201.60  | 29 | 42 | AVTELNEPLSNEDR          | K | N | 1,586.77 |
| 615 | YWHAE 14-3-3 protein epsilon                                                  | IPI00000816                                                                                                                                                                                                                                                             | 29,157.00  | 29 | 42 | KVAGMDVELTVEER          | K | N | 1,575.80 |
| 616 | YWHAG 14-3-3 protein gamma                                                    | IPI00220642                                                                                                                                                                                                                                                             | 28,285.10  | 29 | 42 | NVTELNEPLSNEER          | K | N | 1,643.79 |
| 617 | ALDOA Fructose-bisphosphate aldolase A                                        | IPI00465439                                                                                                                                                                                                                                                             | 39,402.60  | 29 | 42 | GILAADESTGSIK           | K | R | 1,332.70 |
| 618 | LOC284230 similar to mCG7611                                                  | IPI00176574,IPI00220344,IPI00742027,IPI00917181                                                                                                                                                                                                                         | 12,423.10  | 29 | 38 | GKDSLYAQQGK             | K | R | 1,066.55 |
| 619 | SFRS3 Splicing factor, arginine/serine-rich 3                                 | IPI00010204,IPI00843996                                                                                                                                                                                                                                                 | 19,312.00  | 29 | 37 | AFGYGGLR                | R | S | 1,043.53 |
| 620 | SFRS3 Splicing factor, arginine/serine-rich 3                                 | IPI00010204,IPI00843996                                                                                                                                                                                                                                                 | 19,312.00  | 29 | 37 | AFGYGGLR                | R | S | 1,043.53 |
| 621 | SKP1 Isoform 1 of S-phase kinase-associated protein 1                         | IPI00301364                                                                                                                                                                                                                                                             | 18,640.30  | 29 | 57 | TMLEDLGMDDDEGDDDPVPLP   | K | V | 3,157.49 |
| 622 | MXRA7 Isoform 2 of Matrix-remodeling-associated protein 7                     | IPI00397645,IPI00749188                                                                                                                                                                                                                                                 | 17,475.40  | 30 | 39 | NVNAAILKK<br>GAAASPEPAR | R | A | 926.469  |
| 623 | HMGB2 High mobility group protein B2                                          | IPI00219097                                                                                                                                                                                                                                                             | 24,016.60  | 30 | 44 | KHPDSSVNFSEFSK          | K | C | 1,720.87 |
| 624 | ASRGL1 Isoform 1 of L-asparaginase                                            | IPI00555734                                                                                                                                                                                                                                                             | 32,036.10  | 30 | 39 | AATVGYGILR              | R | E | 1,020.58 |
| 625 | NDUFB10 NADH dehydrogenase [ubiquinone] 1 beta subcomplex subunit 10          | IPI00479905                                                                                                                                                                                                                                                             | 20,758.70  | 30 | 43 | AFDLIVDRPVTLVR          | K | E | 1,613.94 |
| 626 | CXorf38 Isoform 1 of Uncharacterized protein CXorf38                          | IPI00152089,IPI00552646,IPI00910523                                                                                                                                                                                                                                     | 36,651.50  | 30 | 38 | SCLQGFVGR               | R | E | 1,023.50 |
| 627 | HNRNPH1 Heterogeneous nuclear ribonucleoprotein H                             | IPI00013881,IPI00479191                                                                                                                                                                                                                                                 | 49,211.80  | 30 | 44 | FFSDCKIQNGAQQGIR        | R | F | 1,740.85 |
| 628 | HNRNPH1 Heterogeneous nuclear ribonucleoprotein H                             | IPI00013881,IPI00479191                                                                                                                                                                                                                                                 | 49,211.80  | 30 | 35 | FFSDCK                  | R | I | 803.3393 |
| 629 | HNRNPH1 Heterogeneous nuclear ribonucleoprotein H                             | IPI00013881,IPI00479191                                                                                                                                                                                                                                                 | 49,211.80  | 30 | 35 | FFSDCK                  | R | I | 803.3393 |
| 630 | HNRNPH2 Heterogeneous nuclear ribonucleoprotein H2                            | IPI00026230                                                                                                                                                                                                                                                             | 49,246.10  | 30 | 35 | FFSDCK                  | R | I | 803.3393 |
| 631 | HNRNPH2 Heterogeneous nuclear ribonucleoprotein H2                            | IPI00026230                                                                                                                                                                                                                                                             | 49,246.10  | 30 | 35 | FFSDCK                  | R | I | 803.3393 |
| 632 | HMGB1 High mobility group protein B1                                          | IPI00419258                                                                                                                                                                                                                                                             | 24,876.70  | 30 | 43 | KHPDASVNFSEFSK          | K | K | 1,592.77 |
| 633 | UBB;RPS27A;UBC ubiquitin and ribosomal protein S27a precursor                 | IPI00179330,IPI00456429,IPI00719280,IPI00743241,IPI00743650,IPI00744274,IPI00784990,IPI00789107,IPI00789823,IPI00790633,IPI00792712,IPI00793330,IPI00793729,IPI00793810,IPI00794211,IPI00794925,IPI00795527,IPI00796007,IPI00796600,IPI00797400,IPI00798127,IPI00798155 | 17,947.60  | 30 | 42 | IQDKEGIPDQQR            | K | L | 1,523.78 |

|     |                                                                     |                                                                                                                                                                                                                                                        |            |    |    |                             |   |   |          |
|-----|---------------------------------------------------------------------|--------------------------------------------------------------------------------------------------------------------------------------------------------------------------------------------------------------------------------------------------------|------------|----|----|-----------------------------|---|---|----------|
| 634 | UBB;RPS27A;UBC ubiquitin and ribosomal protein S27a precursor       | UPI00179330,UPI00456429,UPI00719280,UPI00743241,UPI00743650,PI00744274,PI00784990,PI00789107,PI00789823,PI00790633,PI00792712,PI00793330,PI00793729,PI00793810,PI00794211,PI00794925,PI00795527,PI00796007,PI00796600,PI00797400,PI00798127,PI00798155 | 17,947.60  | 30 | 42 | IQDKEGIPPDQQR               | K | L | 1,523.78 |
| 635 | UBB;RPS27A;UBC ubiquitin and ribosomal protein S27a precursor       | UPI00179330,UPI00456429,UPI00719280,UPI00743241,UPI00743650,PI00744274,PI00784990,PI00789107,PI00789823,PI00790633,PI00792712,PI00793330,PI00793729,PI00793810,PI00794211,PI00794925,PI00795527,PI00796007,PI00796600,PI00797400,PI00798127,PI00798155 | 17,947.60  | 30 | 42 | IQDKEGIPPDQQR               | K | L | 1,523.78 |
| 636 | UBB;RPS27A;UBC ubiquitin and ribosomal protein S27a precursor       | UPI00179330,UPI00456429,UPI00719280,UPI00743241,UPI00743650,PI00744274,PI00784990,PI00789107,PI00789823,PI00790633,PI00792712,PI00793330,PI00793729,PI00793810,PI00794211,PI00794925,PI00795527,PI00796007,PI00796600,PI00797400,PI00798127,PI00798155 | 17,947.60  | 30 | 42 | IQDKEGIPPDQQR               | K | L | 1,523.78 |
| 637 | UBB;RPS27A;UBC ubiquitin and ribosomal protein S27a precursor       | UPI00179330,UPI00456429,UPI00719280,UPI00743241,UPI00743650,PI00744274,PI00784990,PI00789107,PI00789823,PI00790633,PI00792712,PI00793330,PI00793729,PI00793810,PI00794211,PI00794925,PI00795527,PI00796007,PI00796600,PI00797400,PI00798127,PI00798155 | 17,947.60  | 30 | 42 | IQDKEGIPPDQQR               | K | L | 1,523.78 |
| 638 | UBB;RPS27A;UBC ubiquitin and ribosomal protein S27a precursor       | UPI00179330,UPI00456429,UPI00719280,UPI00743241,UPI00743650,PI00744274,PI00784990,PI00789107,PI00789823,PI00790633,PI00792712,PI00793330,PI00793729,PI00793810,PI00794211,PI00794925,PI00795527,PI00796007,PI00796600,PI00797400,PI00798127,PI00798155 | 17,947.60  | 30 | 42 | IQDKEGIPPDQQR               | K | L | 1,523.78 |
| 639 | UBB;RPS27A;UBC ubiquitin and ribosomal protein S27a precursor       | UPI00179330,UPI00456429,UPI00719280,UPI00743241,UPI00743650,PI00744274,PI00784990,PI00789107,PI00789823,PI00790633,PI00792712,PI00793330,PI00793729,PI00793810,PI00794211,PI00794925,PI00795527,PI00796007,PI00796600,PI00797400,PI00798127,PI00798155 | 17,947.60  | 30 | 42 | IQDKEGIPPDQQR               | K | L | 1,523.78 |
| 640 | UBB;RPS27A;UBC ubiquitin and ribosomal protein S27a precursor       | UPI00179330,UPI00456429,UPI00719280,UPI00743241,UPI00743650,PI00744274,PI00784990,PI00789107,PI00789823,PI00790633,PI00792712,PI00793330,PI00793729,PI00793810,PI00794211,PI00794925,PI00795527,PI00796007,PI00796600,PI00797400,PI00798127,PI00798155 | 17,947.60  | 30 | 42 | IQDKEGIPPDQQR               | K | L | 1,523.78 |
| 641 | TOMM20 Mitochondrial import receptor subunit TOM20 homolog          | UPI00016676                                                                                                                                                                                                                                            | 16,280.30  | 30 | 37 | SDPNFKNR                    | R | L | 977.4799 |
| 642 | CYB5R3 Isoform 1 of NADH-cytochrome b5 reductase 3                  | UPI00328415,UPI00446235,UPI00871319                                                                                                                                                                                                                    | 34,218.30  | 30 | 46 | STPAITLESPIKYPLR            | R | L | 1,901.04 |
| 643 | YWHAE 14-3-3 protein epsilon                                        | UPI00000816                                                                                                                                                                                                                                            | 29,157.00  | 30 | 42 | VAGMDVELTVEER               | K | N | 1,447.71 |
| 644 | RUVBL2 RuvB-like 2                                                  | UPI00009104                                                                                                                                                                                                                                            | 51,140.10  | 30 | 40 | GLGLDDALEPR                 | R | Q | 1,155.60 |
| 645 | CDKN2A Cyclin-dependent kinase inhibitor                            | UPI00001560                                                                                                                                                                                                                                            | 17,865.30  | 30 | 46 | ALLEAGALPNAPNSYGR           | R | R | 1,713.89 |
| 646 | COMMD2 COMM domain-containing protein 2                             | UPI00456048                                                                                                                                                                                                                                            | 22,727.60  | 30 | 36 | IAVEFLR                     | R | R | 847.5036 |
| 647 | MLF2 Myeloid leukemia factor 2                                      | UPI00023095                                                                                                                                                                                                                                            | 28,129.90  | 30 | 56 | MLSGGFGYSPFLSITDGNMP        | R | R | 2,832.34 |
| 648 | TNPO3 Isoform 2 of Transportin-3                                    | UPI00395694,UPI00455125,UPI00455127,UPI00872398                                                                                                                                                                                                        | 104,186.30 | 30 | 39 | GTRPASR<br>ASFWLGLQLQR      | R | S | 1,206.63 |
| 649 | HDGF Hepatoma-derived growth factor                                 | UPI00020956                                                                                                                                                                                                                                            | 26,770.50  | 30 | 39 | IDEMPEAAVK                  | R | S | 1,102.55 |
| 650 | RPL18A 60S ribosomal protein L18a                                   | UPI00026202                                                                                                                                                                                                                                            | 20,744.60  | 30 | 41 | MRIFAPNHVVAK                | R | S | 1,398.77 |
| 651 | WDR61 WD repeat-containing protein 61                               | UPI00019269                                                                                                                                                                                                                                            | 33,562.80  | 30 | 45 | ENSETVVTGSLDDLK             | K | V | 1,705.85 |
| 652 | ST13 Hsc70-interacting protein                                      | UPI00032826                                                                                                                                                                                                                                            | 41,314.40  | 30 | 41 | FLREWVESMGGK                | R | V | 1,438.71 |
| 653 | HNRNPC Isoform C1 of Heterogeneous nuclear ribonucleoproteins C1/C2 | UPI00216592,UPI00477313,UPI00909232                                                                                                                                                                                                                    | 32,320.00  | 30 | 39 | KSDVEAIFSK                  | K | Y | 1,123.60 |
| 654 | POLR2G DNA-directed RNA polymerase II subunit RPB7                  | UPI00218895                                                                                                                                                                                                                                            | 19,276.60  | 30 | 41 | LFTEVEGTCTGK                | K | Y | 1,341.64 |
| 655 | CCDC86 Coiled-coil domain-containing protein 86                     | UPI00012199                                                                                                                                                                                                                                            | 40,218.10  | 31 | 53 | ALVEFESNPEETREPGSPPSV<br>QR | R | A | 2,555.24 |
| 656 | MAT2B Isoform 1 of Methionine adenosyltransferase 2 subunit beta    | UPI00002324                                                                                                                                                                                                                                            | 37,533.60  | 31 | 42 | VLVTGATGALLGR               | R | A | 1,156.71 |
| 657 | TAF9 Adenylate kinase isoenzyme 6                                   | UPI00032879,UPI00556532                                                                                                                                                                                                                                | 20,043.80  | 31 | 39 | YINVGDLAR                   | K | E | 1,020.55 |
| 658 | PSMA6 Proteasome subunit alpha type-6                               | UPI00029623                                                                                                                                                                                                                                            | 27,381.50  | 31 | 43 | AINQGGLTSVAVR               | K | G | 1,285.72 |
| 659 | PGK1 Phosphoglycerate kinase 1                                      | UPI00169383                                                                                                                                                                                                                                            | 44,597.30  | 31 | 39 | NNQITNNQR                   | K | I | 1,101.54 |
| 660 | RPL17;LOC100133931 60S ribosomal protein L17                        | UPI00413324,UPI00478208                                                                                                                                                                                                                                | 21,379.40  | 31 | 42 | ETAQAIKGMHIR                | R | K | 1,370.72 |
| 661 | RARS Isoform Complexed of Arginyl-tRNA synthetase, cytoplasmic      | UPI00004860                                                                                                                                                                                                                                            | 75,364.00  | 31 | 50 | NCGCLGASPNLEQLQEENLK        | K | L | 2,274.05 |
| 662 | ARL1 ADP-ribosylation factor-like protein 1                         | UPI00219518,UPI00908516                                                                                                                                                                                                                                | 20,400.20  | 31 | 36 | TTILYR                      | K | L | 766.4458 |
| 663 | USP14 Ubiquitin carboxyl-terminal hydrolase 14                      | UPI00219913,UPI00640357,UPI00871297,UPI00872664                                                                                                                                                                                                        | 56,052.30  | 31 | 43 | AQLFALTGVQPAR               | K | Q | 1,371.77 |
| 664 | MOBK1B Isoform 1 of Mps one binder kinase activator-like 1B         | UPI00301518                                                                                                                                                                                                                                            | 25,062.60  | 31 | 42 | HAEATLGSGNLR                | K | Q | 1,225.63 |



|     |                                                                                    |                                     |            |    |    |                      |   |   |          |
|-----|------------------------------------------------------------------------------------|-------------------------------------|------------|----|----|----------------------|---|---|----------|
| 665 | HMGA1 Isoform HMG-I of High mobility group protein HMG-I/HMG-Y                     | IPI00179700,IPI00744851,IPI00746310 | 11,658.20  | 31 | 55 | KQPPVSPGTLVGSQKEPSE  | R | R | 2,558.38 |
| 666 | AASDHPPT L-aminoadipate-semialdehyde dehydrogenase-phosphopantetheinyl transferase | IPI00250297                         | 35,759.10  | 31 | 38 | VPTPK<br>AEWLLAVR    | R | S | 957.5516 |
| 667 | RHO G Rho-related GTP-binding protein RhoG                                         | IPI00017342                         | 21,290.10  | 31 | 49 | EYIPTVFDNYSQAQSAVDGR | K | T | 2,131.99 |
| 668 | FDFT1 Squalene synthetase                                                          | IPI00020944,IPI00908715             | 48,098.40  | 31 | 41 | MDQDSLSSSLK          | K | T | 1,226.56 |
| 669 | PABPC1 Isoform 1 of Polyadenylate-binding protein 1                                | IPI00008524                         | 70,653.30  | 31 | 41 | FSPAGPILSIR          | K | V | 1,157.67 |
| 670 | HNRNPC Isoform C1 of Heterogeneous nuclear ribonucleoproteins C1/C2                | IPI00216592,IPI00477313,IPI00909232 | 32,320.00  | 31 | 39 | SDVEAIFSK            | K | Y | 995.5044 |
| 671 | PPIA Peptidyl-prolyl cis-trans isomerase A                                         | IPI00419585,IPI00887678             | 17,994.90  | 32 | 37 | TAENFR               | K | A | 737.3576 |
| 672 | PPIA Peptidyl-prolyl cis-trans isomerase A                                         | IPI00419585,IPI00887678             | 17,994.90  | 32 | 37 | TAENFR               | K | A | 737.3576 |
| 673 | BZW2 Basic leucine zipper and W2 domain-containing protein 2                       | IPI00022305,IPI00894416             | 48,146.00  | 32 | 50 | DTLVQGLNEAGDDLEAVAK  | R | F | 1,957.97 |
| 674 | RPS6 40S ribosomal protein S6                                                      | IPI00021840                         | 28,663.70  | 32 | 46 | MATEVAADALGEEWK      | R | G | 1,636.75 |
| 675 | IPO8 Importin-8                                                                    | IPI00007401                         | 119,959.60 | 32 | 41 | IINFAPSLLR           | K | I | 1,143.69 |
| 676 | CHAF1B Chromatin assembly factor 1 subunit B                                       | IPI00011857                         | 61,474.80  | 32 | 42 | LASAGVDTNVR          | R | I | 1,102.59 |
| 677 | RPS6 40S ribosomal protein S6                                                      | IPI00021840                         | 28,663.70  | 32 | 51 | MATEVAADALGEEWKGYVVR | R | I | 2,195.08 |
| 678 | UGDH UDP-glucose 6-dehydrogenase                                                   | IPI00031420                         | 55,007.30  | 32 | 41 | VTVVVDNESR           | R | I | 1,117.58 |
| 679 | RPL12 Isoform 1 of 60S ribosomal protein L12                                       | IPI00024933                         | 17,801.10  | 32 | 40 | IGPLGLSPK            | K | K | 881.5457 |
| 680 | RPL31 60S ribosomal protein L31                                                    | IPI00026302                         | 14,445.20  | 32 | 39 | RIHGVGFK             | K | K | 913.5367 |
| 681 | RAP1B Ras-related protein Rap-1b                                                   | IPI00015148,IPI00796349             | 20,806.90  | 32 | 41 | YDPTIEDSYR           | K | K | 1,258.56 |
| 682 | NUP93 Nuclear pore complex protein Nup93                                           | IPI00397904                         | 93,473.20  | 32 | 42 | NLQEIQQAGER          | R | L | 1,285.65 |
| 683 | RPS10 40S ribosomal protein S10                                                    | IPI00008438                         | 18,880.30  | 32 | 38 | HPELADK              | K | N | 809.4153 |
| 684 | NUP107 Nuclear pore complex protein Nup107                                         | IPI00028005                         | 106,358.70 | 32 | 48 | VLLQASQDENFGNTTPR    | R | N | 1,889.94 |
| 685 | SLC25A5 ADP/ATP translocase 2                                                      | IPI00007188                         | 32,878.50  | 32 | 43 | VKLLQVQHASK          | R | Q | 1,363.84 |
| 686 | SLC25A6 ADP/ATP translocase 3                                                      | IPI00291467                         | 32,849.10  | 32 | 43 | VKLLQVQHASK          | R | Q | 1,363.84 |
| 687 | RPL18A 60S ribosomal protein L18a                                                  | IPI00026202                         | 20,744.60  | 32 | 41 | IFAPNHVVAK           | R | S | 1,095.63 |
| 688 | AK1 Adenylate kinase isoenzyme 1                                                   | IPI00018342,IPI00640817             | 21,617.10  | 32 | 44 | YGYTHLSTGDLLR        | K | S | 1,495.75 |
| 689 | RAB7A Ras-related protein Rab-7a                                                   | IPI00016342                         | 23,472.00  | 33 | 38 | FSNQYK               | K | A | 786.378  |
| 690 | EEF2 Elongation factor 2                                                           | IPI00186290                         | 95,322.10  | 33 | 42 | STLTDSLVCCK          | K | A | 1,123.57 |
| 691 | EEF2 Elongation factor 2                                                           | IPI00186290                         | 95,322.10  | 33 | 42 | STLTDSLVCCK          | K | A | 1,123.57 |
| 692 | EEF2 Elongation factor 2                                                           | IPI00186290                         | 95,322.10  | 33 | 42 | STLTDSLVCCK          | K | A | 1,123.57 |
| 693 | EEF2 Elongation factor 2                                                           | IPI00186290                         | 95,322.10  | 33 | 42 | STLTDSLVCCK          | K | A | 1,123.57 |
| 694 | EEF2 Elongation factor 2                                                           | IPI00186290                         | 95,322.10  | 33 | 42 | STLTDSLVCCK          | K | A | 1,123.57 |
| 695 | ENO2 Gamma-enolase                                                                 | IPI00216171                         | 47,251.70  | 33 | 50 | AAVPSGASTGIYEALRLR   | R | D | 1,804.94 |
| 696 | ENO1 Isoform alpha-enolase of Alpha-enolase                                        | IPI00465248                         | 47,152.20  | 33 | 50 | AAVPSGASTGIYEALRLR   | R | D | 1,804.94 |
| 697 | ENO1 Isoform alpha-enolase of Alpha-enolase                                        | IPI00465248                         | 47,152.20  | 33 | 50 | AAVPSGASTGIYEALRLR   | R | D | 1,804.94 |
| 698 | ENO1 Isoform alpha-enolase of Alpha-enolase                                        | IPI00465248                         | 47,152.20  | 33 | 50 | AAVPSGASTGIYEALRLR   | R | D | 1,804.94 |
| 699 | ENO1 Isoform alpha-enolase of Alpha-enolase                                        | IPI00465248                         | 47,152.20  | 33 | 50 | AAVPSGASTGIYEALRLR   | R | D | 1,804.94 |
| 700 | ENO1 Isoform alpha-enolase of Alpha-enolase                                        | IPI00465248                         | 47,152.20  | 33 | 50 | AAVPSGASTGIYEALRLR   | R | D | 1,804.94 |
| 701 | PSMD6 26S proteasome non-ATPase regulatory subunit 6                               | IPI00014151                         | 45,515.40  | 33 | 46 | GDAAVRDELMAAVR       | R | D | 1,489.74 |
| 702 | PARK7 Protein DJ-1                                                                 | IPI00298547                         | 19,873.10  | 33 | 48 | VTVAGLAGKDPVQCSR     | K | D | 1,657.87 |
| 703 | SFPQ Isoform Long of Splicing factor, proline- and glutamine-rich                  | IPI00010740                         | 76,131.50  | 33 | 44 | SPPPGMGLNQNR         | R | G | 1,267.62 |
| 704 | FSCN1 Fascin                                                                       | IPI00163187,IPI00747810             | 54,512.30  | 33 | 41 | VNASASSLK            | K | K | 876.4784 |
| 705 | PMVK Phosphomevalonate kinase                                                      | IPI00220648                         | 21,977.00  | 33 | 42 | LGADVCAVLR           | R | L | 1,073.58 |
| 706 | RPS17 40S ribosomal protein S17                                                    | IPI00221093                         | 15,532.50  | 33 | 45 | RVCEEIAIIPSKK        | K | L | 1,542.87 |
| 707 | PKM2 Isoform M1 of Pyruvate kinase isozymes M1/M2                                  | IPI00220644,IPI00479186             | 58,044.60  | 33 | 43 | LDIDSPPTAR           | R | N | 1,197.65 |
| 708 | PKM2 Isoform M1 of Pyruvate kinase isozymes M1/M2                                  | IPI00220644,IPI00479186             | 58,044.60  | 33 | 43 | LDIDSPPTAR           | R | N | 1,197.65 |
| 709 | FIS1 Mitochondrial fission 1 protein                                               | IPI00007052                         | 16,920.30  | 33 | 44 | STQFEYAWCLVR         | K | S | 1,559.73 |

|     |                                                                                |                                                 |           |    |    |                       |   |   |          |
|-----|--------------------------------------------------------------------------------|-------------------------------------------------|-----------|----|----|-----------------------|---|---|----------|
| 710 | HSDL2 Isoform 2 of Hydroxysteroid dehydrogenase-like protein 2                 | IPI00031107,IPI00414384                         | 45,378.60 | 33 | 42 | DGANIVIAAK            | K | T | 971.5521 |
| 711 | NPM1 Isoform 2 of Nucleophosmin                                                | IPI00220740,IPI00549248                         | 29,446.90 | 33 | 45 | VDNENEHQLSLR          | K | T | 1,568.73 |
| 712 | HIST3H2BB Histone H2B type 3-B                                                 | IPI00166293                                     | 13,890.60 | 33 | 44 | GRKESYSIVVYK          | R | V | 1,492.78 |
| 713 | H2BFS Histone H2B type F-S                                                     | IPI00477495,IPI00816252                         | 13,926.60 | 33 | 44 | SRKESYSVYVYK          | R | V | 1,508.77 |
| 714 | VDAC1 Voltage-dependent anion-selective channel protein 1                      | IPI00216308                                     | 30,755.90 | 33 | 53 | TKSENLEFTSSGSANTETTK  | K | V | 2,189.02 |
| 715 | HIST1H1C Histone H1.2                                                          | IPI00217465                                     | 21,347.80 | 34 | 46 | KASGPPVSELITK         | R | A | 1,326.76 |
| 716 | ZNF593 zinc finger protein 593                                                 | IPI00026276,IPI00844193                         | 15,181.40 | 34 | 62 | ELRPQGSARPQDPNAEFDP   | R | C | 3,123.54 |
| 717 | RBMX Heterogeneous nuclear ribonucleoprotein G                                 | IPI00304692                                     | 42,315.70 | 34 | 43 | DLPGGGLHR             | R | E | 1,231.71 |
| 718 | RUVBL1 Isoform 1 of RuvB-like 1                                                | IPI00021187                                     | 50,211.40 | 34 | 46 | IVEVLLMKDR            | R | E | 1,300.66 |
| 719 | GDI2 cDNA FLJ60299, highly similar to Rab GDP dissociation inhibitor beta      | IPI00031461                                     | 51,138.50 | 34 | 59 | VLHMDRNPYYGGESASITPLE | K | F | 3,040.48 |
| 720 | NOP16 Nucleolar protein 16                                                     | IPI00032849                                     | 21,170.90 | 34 | 40 | DLYKR                 | R | H | 914.4513 |
| 721 | PTGES3 cDNA FLJ50819, highly similar to Prostaglandin E synthase 3             | IPI00790462                                     | 14,940.90 | 34 | 48 | IECSHIR               | K | H | 1,660.80 |
| 722 | PTGES3 cDNA FLJ50819, highly similar to Prostaglandin E synthase 3             | IPI00790462                                     | 14,940.90 | 34 | 48 | SKLTFSCLOGSDNFK       | K | H | 1,660.80 |
| 723 | AKR1B1 Aldose reductase                                                        | IPI00413641                                     | 35,835.90 | 34 | 41 | VAIDVGYR              | R | H | 892.4887 |
| 724 | RPS17 40S ribosomal protein S17                                                | IPI00221093                                     | 15,532.50 | 34 | 44 | VCEEIIIPSK            | K | K | 1,258.67 |
| 725 | DGCR6L Protein DGCR6L                                                          | IPI00260322                                     | 24,914.40 | 34 | 42 | ELPSSFQQR             | R | L | 1,091.55 |
| 726 | ADI1 Isoform 1 of 1,2-dihydroxy-3-keto-5-methylthiopentene dioxygenase         | IPI00651738                                     | 21,481.20 | 34 | 40 | LGVLVWK               | R | L | 878.5135 |
| 727 | RPS17 40S ribosomal protein S17                                                | IPI00221093                                     | 15,532.50 | 34 | 45 | VCEEIIIPSKK           | R | L | 1,386.77 |
| 728 | CACYBP Isoform 1 of Calcyclin-binding protein                                  | IPI00395627                                     | 26,192.30 | 34 | 43 | SKIETEIKNK            | K | M | 1,189.68 |
| 729 | TCP1 T-complex protein 1 subunit alpha                                         | IPI00290566                                     | 60,327.20 | 34 | 43 | SSLGPVGLDK            | K | M | 972.5362 |
| 730 | UBL4A Ubiquitin-like protein 4A                                                | IPI00005658                                     | 17,758.90 | 34 | 39 | LNVPVR                | K | Q | 697.4355 |
| 731 | C14orf149 Probable proline racemase                                            | IPI00386591                                     | 38,149.60 | 34 | 50 | IVLAGCPEVSGPTLLAK     | R | R | 1,724.96 |
| 732 | LTA4H Isoform 1 of Leukotriene A-4 hydrolase                                   | IPI00219077                                     | 69,269.10 | 34 | 51 | TLTGTAALTVQSQEDNLR    | R | S | 1,917.99 |
| 733 | OCIAD1 Isoform 1 of OCIA domain-containing protein 1                           | IPI00016405                                     | 27,608.80 | 34 | 46 | VFAECNDEFWFR          | R | S | 1,706.73 |
| 734 | ELMOD2 ELMO domain-containing protein 2                                        | IPI00217918                                     | 34,944.20 | 34 | 43 | IFDTYVGAQR            | R | T | 1,169.60 |
| 735 | UBE2M NEDD8-conjugating enzyme Ubc12                                           | IPI00022597                                     | 20,882.90 | 34 | 45 | IQKDINELNLPK          | R | T | 1,424.81 |
| 736 | GYG1 Isoform GN-1L of Glycogenin-1                                             | IPI00180386,IPI00556308,IPI00793819,IPI00794444 | 39,366.30 | 34 | 49 | RLVVLATPQVSDSMRK      | R | V | 1,816.01 |
| 737 | ARHGDI2 Rho GDP-dissociation inhibitor 1                                       | IPI00003815,IPI00793767,IPI00794402,IPI00796541 | 23,189.50 | 34 | 50 | SIQEQELDKDDESLRK      | K | Y | 2,046.04 |
| 738 | HIST1H1C Histone H1.2                                                          | IPI00217465                                     | 21,347.80 | 35 | 46 | ASGPPVSELITK          | K | A | 1,198.67 |
| 739 | HIST1H1C Histone H1.2                                                          | IPI00217465                                     | 21,347.80 | 35 | 46 | ASGPPVSELITK          | K | A | 1,198.67 |
| 740 | HIST1H1C Histone H1.2                                                          | IPI00217465                                     | 21,347.80 | 35 | 46 | ASGPPVSELITK          | K | A | 1,198.67 |
| 741 | RNH1 Ribonuclease inhibitor                                                    | IPI00550069                                     | 49,956.40 | 35 | 44 | LDDCGLTEAR            | R | C | 1,149.52 |
| 742 | PPP2CA Serine/threonine-protein phosphatase 2A catalytic subunit alpha isoform | IPI00008380                                     | 35,576.50 | 35 | 41 | AKEILTK               | K | E | 802.5034 |
| 743 | LAP3 Isoform 1 of Cytosol aminopeptidase                                       | IPI00419237,IPI00789806                         | 56,149.70 | 35 | 43 | GLVLGIYSK             | K | E | 949.5718 |
| 744 | PGD 6-phosphogluconate dehydrogenase, decarboxylating                          | IPI00219525,IPI00747533                         | 53,123.90 | 35 | 48 | TVSKVDDFLANEAK        | R | G | 1,536.79 |
| 745 | KPNA6 cDNA FLJ53229, highly similar to Importin alpha-7 subunit                | IPI00747764                                     | 60,563.50 | 35 | 44 | RREEEGIQLR            | R | K | 1,285.70 |
| 746 | PSMD7 26S proteasome non-ATPase regulatory subunit 7                           | IPI00019927                                     | 37,007.50 | 35 | 45 | VVGVLGWSWQK           | R | K | 1,185.70 |
| 747 | RPS3A 40S ribosomal protein S3a                                                | IPI00419880,IPI00472119                         | 29,927.30 | 35 | 42 | APAMFNIR              | K | N | 935.4768 |
| 748 | ANXA6 annexin VI isoform 2                                                     | IPI00002459,IPI00221226                         | 75,262.70 | 35 | 50 | GFGSDKEAILDIITSR      | K | S | 1,721.91 |
| 749 | HPRT1 Hypoxanthine-guanine phosphoribosyltransferase                           | IPI00218493,IPI00873466                         | 24,562.20 | 35 | 45 | VFIPHGLIMDR           | R | T | 1,297.71 |
| 750 | HIST3H2BB Histone H2B type 3-B                                                 | IPI00166293                                     | 13,890.60 | 35 | 44 | KESYSIVVYK            | R | V | 1,279.66 |
| 751 | HIST1H2BJ Histone H2B type 1-J                                                 | IPI00515061                                     | 13,886.70 | 35 | 44 | KESYSIVVYK            | R | V | 1,279.66 |
| 752 | H2BFS Histone H2B type F-S                                                     | IPI00477495,IPI00816252                         | 13,926.60 | 35 | 44 | KESYSVYVYK            | R | V | 1,265.64 |

|     |                                                                                                                      |                                                                                     |           |    |    |                      |   |   |          |
|-----|----------------------------------------------------------------------------------------------------------------------|-------------------------------------------------------------------------------------|-----------|----|----|----------------------|---|---|----------|
| 753 | H2BFS Histone H2B type F-S                                                                                           | IPI00477495,IPI00816252                                                             | 13,926.60 | 35 | 44 | KESYSVYVYK           | R | V | 1,265.64 |
| 754 | NDUFA12 13kDa differentiation-associated protein variant (Fragment)                                                  | IPI00005966                                                                         | 17,196.50 | 35 | 43 | VGTLVGEDK            | K | Y | 917.494  |
| 755 | NDUFA12 13kDa differentiation-associated protein variant (Fragment)                                                  | IPI00005966                                                                         | 17,196.50 | 35 | 47 | VGTLVGEDKYGNK        | K | Y | 1,379.72 |
| 756 | XRCC6 ATP-dependent DNA helicase 2 subunit 1                                                                         | IPI00644712                                                                         | 69,828.40 | 36 | 46 | DSLIFLVDASK          | R | A | 1,207.66 |
| 757 | PDCD10 Programmed cell death protein 10                                                                              | IPI00298558                                                                         | 24,684.50 | 36 | 45 | VNLSAAQTLR           | R | A | 1,072.61 |
| 758 | MAGOHB Protein mago nashi homolog 2                                                                                  | IPI00059292                                                                         | 17,258.60 | 36 | 50 | YANNSNYKNDVMIRK      | R | E | 1,845.89 |
| 759 | HNRNPH1 Heterogeneous nuclear ribonucleoprotein H                                                                    | IPI00013881,IPI00479191                                                             | 49,211.80 | 36 | 44 | IQNGAQQIR            | K | F | 956.5273 |
| 760 | HNRNPH1 Heterogeneous nuclear ribonucleoprotein H                                                                    | IPI00013881,IPI00479191                                                             | 49,211.80 | 36 | 44 | IQNGAQQIR            | K | F | 956.5273 |
| 761 | PPCS Phosphopantothenate--cysteine ligase                                                                            | IPI00023987                                                                         | 33,988.00 | 36 | 55 | RVVLVTSGGTKVPLEARPVR | R | F | 2,134.28 |
| 762 | UBE2T Ubiquitin-conjugating enzyme E2 T                                                                              | IPI00023087                                                                         | 22,503.80 | 36 | 48 | AQILGGANTPYEK        | R | G | 1,361.71 |
| 763 | PTGES3 cDNA FLJ50819, highly similar to Prostaglandin E synthase 3                                                   | IPI00790462                                                                         | 14,940.90 | 36 | 48 | LTFSCGGSDNFK         | K | H | 1,445.67 |
| 764 | PTGES3 cDNA FLJ50819, highly similar to Prostaglandin E synthase 3                                                   | IPI00790462                                                                         | 14,940.90 | 36 | 48 | LTFSCGGSDNFK         | K | H | 1,445.67 |
| 765 | RPL14 Ribosomal protein L14 variant                                                                                  | IPI00555744                                                                         | 23,769.70 | 36 | 46 | ALVDGPCTQVR          | R | R | 1,215.62 |
| 766 | GABARAPL2 Gamma-aminobutyric acid receptor-associated protein-like 2                                                 | IPI00026358                                                                         | 13,649.10 | 36 | 48 | VSGSQIVDIDKRK        | K | Y | 1,444.81 |
| 767 | IGF2BP3 Isoform 1 of Insulin-like growth factor 2 mRNA-binding protein 3                                             | IPI00658000                                                                         | 63,702.90 | 37 | 52 | TGYAFVDCPDESWALK     | K | A | 1,858.83 |
| 768 | MRFAP1 MORF4 family-associated protein 1                                                                             | IPI00020915                                                                         | 14,631.80 | 37 | 44 | EDIASLTR             | R | E | 904.4735 |
| 769 | CDC2 Putative uncharacterized protein DKFZp686L20222                                                                 | IPI00026689                                                                         | 34,762.10 | 37 | 52 | IRLESEEEGVPSTAIR     | K | E | 1,785.93 |
| 770 | CDC2 Putative uncharacterized protein DKFZp686L20222                                                                 | IPI00026689                                                                         | 34,762.10 | 37 | 52 | IRLESEEEGVPSTAIR     | K | E | 1,785.93 |
| 771 | ALG13 UDP-N-acetylglucosamine transferase subunit ALG13 homolog                                                      | IPI00020512                                                                         | 18,207.50 | 37 | 43 | LILQIGR              | R | G | 812.5354 |
| 772 | SNRNP Isoform SM-B' of Small nuclear ribonucleoprotein-associated proteins B and B'                                  | IPI00027285,IPI00220360,IPI00329512,IPI00395674,IPI00785142,IPI00844420,IPI00877103 | 24,592.60 | 37 | 50 | HMNLILCDCDEFK        | K | I | 1,850.83 |
| 773 | RPL9 60S ribosomal protein L9                                                                                        | IPI00031691                                                                         | 21,845.70 | 37 | 50 | DFNHINVELSLLGK       | R | K | 1,598.85 |
| 774 | PAICS phosphoribosylaminoimidazole carboxylase, phosphoribosylaminoimidazole succinocarboxamide synthetase isoform 1 | IPI00815732                                                                         | 47,941.00 | 37 | 46 | DQITAGNAAR           | K | K | 1,016.51 |
| 775 | PSMA7 Isoform 1 of Proteasome subunit alpha type-7                                                                   | IPI00024175                                                                         | 27,869.10 | 37 | 47 | GRDIVVLGVEK          | R | K | 1,184.70 |
| 776 | FAM32A Protein FAM32A                                                                                                | IPI00022402                                                                         | 13,160.80 | 37 | 45 | LLEAMGTSK            | K | K | 965.4974 |
| 777 | DUSP3 Dual specificity protein phosphatase 3                                                                         | IPI00018671,IPI00790757                                                             | 20,460.80 | 37 | 50 | IYVGNASVAQDIPK       | R | L | 1,474.79 |
| 778 | HSPA8 Isoform 1 of Heat shock cognate 71 kDa protein                                                                 | IPI00003865                                                                         | 70,881.80 | 37 | 49 | TTPSYVAFTDTER        | R | L | 1,487.70 |
| 779 | HSPA1A;HSPA1B Heat shock 70 kDa protein 1                                                                            | IPI00304925                                                                         | 70,036.00 | 37 | 49 | TTPSYVAFTDTER        | R | L | 1,487.70 |
| 780 | HSPA1A;HSPA1B Heat shock 70 kDa protein 1                                                                            | IPI00304925                                                                         | 70,036.00 | 37 | 49 | TTPSYVAFTDTER        | R | L | 1,487.70 |
| 781 | HSPA1A;HSPA1B Heat shock 70 kDa protein 1                                                                            | IPI00304925                                                                         | 70,036.00 | 37 | 49 | TTPSYVAFTDTER        | R | L | 1,487.70 |
| 782 | HSPA1A;HSPA1B Heat shock 70 kDa protein 1                                                                            | IPI00304925                                                                         | 70,036.00 | 37 | 49 | TTPSYVAFTDTER        | R | L | 1,487.70 |
| 783 | HSPA1A;HSPA1B Heat shock 70 kDa protein 1                                                                            | IPI00304925                                                                         | 70,036.00 | 37 | 49 | TTPSYVAFTDTER        | R | L | 1,487.70 |
| 784 | HSPA1A;HSPA1B Heat shock 70 kDa protein 1                                                                            | IPI00304925                                                                         | 70,036.00 | 37 | 49 | TTPSYVAFTDTER        | R | L | 1,487.70 |
| 785 | HSPA1A;HSPA1B Heat shock 70 kDa protein 1                                                                            | IPI00304925                                                                         | 70,036.00 | 37 | 49 | TTPSYVAFTDTER        | R | L | 1,487.70 |
| 786 | - cDNA FLJ54408, highly similar to Heat shock 70 kDa protein 1                                                       | IPI00911039                                                                         | 63,907.90 | 37 | 49 | TTPSYVAFTDTER        | R | L | 1,487.70 |
| 787 | TMEM97 Transmembrane protein 97                                                                                      | IPI00020004                                                                         | 20,831.50 | 37 | 44 | ELYPVEFR             | R | N | 1,052.54 |
| 788 | XRCC5 ATP-dependent DNA helicase 2 subunit 2                                                                         | IPI00220834,IPI00871391                                                             | 82,689.10 | 37 | 44 | VITMFVQR             | K | Q | 1,009.55 |
| 789 | PSMA7 Isoform 1 of Proteasome subunit alpha type-7                                                                   | IPI00024175                                                                         | 27,869.10 | 37 | 48 | GRDIVVLGVEKK         | R | S | 1,312.79 |
| 790 | FAM96A UPF0195 protein FAM96A                                                                                        | IPI00030985                                                                         | 18,337.20 | 37 | 45 | ALEVYDLIR            | K | T | 1,091.61 |
| 791 | UBE2M NEDD8-conjugating enzyme Ubc12                                                                                 | IPI00022597                                                                         | 20,882.90 | 37 | 45 | DINELNLPK            | K | T | 1,055.57 |
| 792 | PTP4A2 Isoform 1 of Protein tyrosine phosphatase type IVA 2                                                          | IPI00020191                                                                         | 19,109.30 | 37 | 44 | YGVTTLVR             | K | V | 908.52   |

|     |                                                                                                   |                                                 |            |    |    |                               |   |   |          |
|-----|---------------------------------------------------------------------------------------------------|-------------------------------------------------|------------|----|----|-------------------------------|---|---|----------|
| 793 | DNAJC12 Isoform a of DnaJ homolog subfamily C member 12                                           | IPI00029149,IPI00220169                         | 23,397.30  | 38 | 51 | ALECHPDKHPENPK                | R | A | 1,671.79 |
| 794 | PHB2 Prohibitin-2                                                                                 | IPI00027252                                     | 33,279.60  | 38 | 48 | ESVFTVEGGHR                   | R | A | 1,217.59 |
| 795 | NAPA Alpha-soluble NSF attachment protein                                                         | IPI00009253                                     | 33,216.10  | 38 | 47 | IEEACEIYAR                    | K | A | 1,253.58 |
| 796 | IGF2BP2 insulin-like growth factor 2 mRNA binding protein 2 isoform a                             | IPI00179713,IPI00180983,IPI00743914             | 66,104.40  | 38 | 53 | SGYAFVDYPQNWAIK               | K | A | 1,901.88 |
| 797 | WDR77 Methylosome protein 50                                                                      | IPI00012202                                     | 36,705.20  | 38 | 52 | SDGALLLGASSLSGR               | R | C | 1,403.75 |
| 798 | SMNDC1 Survival of motor neuron-related-splicing factor 30                                        | IPI00025176                                     | 26,693.40  | 38 | 47 | DLQEVIELTK                    | K | D | 1,187.65 |
| 799 | CAPZA2 F-actin-capping protein subunit alpha-2                                                    | IPI00026182                                     | 32,931.20  | 38 | 47 | LLLNNNDLLR                    | R | E | 1,197.70 |
| 800 | PPIA Peptidyl-prolyl cis-trans isomerase A                                                        | IPI00419585,IPI00887678                         | 17,994.90  | 38 | 49 | ALSTGEKGFQYK                  | R | G | 1,257.65 |
| 801 | CMAS Isoform 1 of N-acylneuraminate cytidyltransferase                                            | IPI00303158                                     | 48,361.60  | 38 | 52 | GVEKPPHAAALILAR               | R | G | 1,584.96 |
| 802 | EEF1A2 Elongation factor 1-alpha 2                                                                | IPI00014424                                     | 50,452.60  | 38 | 51 | TIEKFEKEAAEMGK                | R | G | 1,610.81 |
| 803 | EEF1A1 Elongation factor 1-alpha 1                                                                | IPI00396485                                     | 50,123.20  | 38 | 51 | TIEKFEKEAAEMGK                | R | G | 1,610.81 |
| 804 | CCT7 T-complex protein 1 subunit eta                                                              | IPI00018465                                     | 59,349.80  | 38 | 43 | TTLGPR                        | R | G | 644.3727 |
| 805 | HNRNPK Isoform 1 of Heterogeneous nuclear ribonucleoprotein K                                     | IPI00216049,IPI00216746,IPI00807545,IPI00910458 | 50,960.50  | 38 | 46 | NTDEMVELR                     | R | I | 1,122.51 |
| 806 | BAX Isoform Epsilon of Apoptosis regulator BAX                                                    | IPI00071059,IPI00443773,IPI00444945,IPI00845474 | 18,111.40  | 38 | 57 | MGGEAPELALDPVPQDASTK          | R | K | 2,025.98 |
| 807 | MTHFD1 C-1-tetrahydrofolate synthase, cytoplasmic                                                 | IPI00218342,IPI00794900                         | 101,543.50 | 38 | 56 | LAILQVGNRDDSPLYINVK           | R | L | 2,145.17 |
| 808 | BAX Isoform Epsilon of Apoptosis regulator BAX                                                    | IPI00071059,IPI00443773,IPI00444945,IPI00845474 | 18,111.40  | 38 | 58 | MGGEAPELALDPVPQDASTK          | R | L | 2,170.07 |
| 809 | C9orf23 Alba-like protein C9orf23                                                                 | IPI00166873                                     | 17,613.40  | 38 | 46 | NLLGLALGR                     | R | L | 926.5783 |
| 810 | NUDC Nuclear migration protein nudC                                                               | IPI00550746                                     | 38,225.70  | 38 | 53 | RKTDFFIGGEEGMAEK              | R | L | 1,830.87 |
| 811 | SNRPD2 Small nuclear ribonucleoprotein Sm D2                                                      | IPI00017963                                     | 13,509.10  | 38 | 47 | NNTQVLINCR                    | K | N | 1,231.62 |
| 812 | DHFR Dihydrofolate reductase                                                                      | IPI00030357,IPI00887771                         | 21,435.30  | 38 | 47 | MTTSSVEGK                     | R | Q | 1,056.49 |
| 813 | CLIC1 Chloride intracellular channel protein 1                                                    | IPI00010896                                     | 26,905.30  | 38 | 49 | GVTFNVTTVDTK                  | K | R | 1,281.67 |
| 814 | PBK cDNA FLJ58333, highly similar to T-lymphokine-activated killer cell-originated protein kinase | IPI00306708                                     | 37,194.90  | 38 | 50 | LGFGTGVNVYLMK                 | K | R | 1,398.75 |
| 815 | RPL7A 60S ribosomal protein L7a                                                                   | IPI00299573                                     | 29,978.30  | 38 | 48 | NFGIGQDIQPK                   | K | R | 1,216.63 |
| 816 | AKR7A2 Aflatoxin B1 aldehyde reductase member 2                                                   | IPI00305978                                     | 39,571.00  | 38 | 49 | VASVLGTMEMGR                  | R | R | 1,282.61 |
| 817 | GIN51 DNA replication complex GINS protein PSF1                                                   | IPI00032387,IPI00910150                         | 22,971.30  | 38 | 51 | ALYEQNQSDVNEAK                | K | S | 1,608.75 |
| 818 | HNRNPU heterogeneous nuclear ribonucleoprotein U isoform a                                        | IPI00644079                                     | 90,567.20  | 38 | 69 | LQAALDDEEAGGRPAMEPGN          | R | S | 3,126.44 |
| 819 | MYL6B;MYL6 Isoform Non-muscle of Myosin light polypeptide 6                                       | IPI00335168,IPI00789605,IPI00796366             | 16,911.80  | 38 | 50 | GSLDLGGDSAGR<br>ALGQNPTNAEVLK | R | V | 1,354.73 |
| 820 | NIT2 Nitrilase homolog 2                                                                          | IPI00549467,IPI00872668                         | 30,590.80  | 38 | 52 | IVSLPECFNSPYGAK               | K | Y | 1,681.83 |
| 821 | RPL11 Isoform 1 of 60S ribosomal protein L11                                                      | IPI00376798                                     | 20,235.20  | 39 | 52 | VLEQLTGQTPVFSK                | K | A | 1,546.85 |
| 822 | AP3M1 AP-3 complex subunit mu-1                                                                   | IPI00032459                                     | 46,922.00  | 39 | 61 | AADVENVPPVISTPHHYLSIY         | K | D | 2,591.36 |
| 823 | RAB7A Ras-related protein Rab-7a                                                                  | IPI00016342                                     | 23,472.00  | 39 | 48 | ATIGADFLTK                    | K | E | 1,036.57 |
| 824 | CDC2 Putative uncharacterized protein DKFZp686L20222                                              | IPI00026689                                     | 34,762.10  | 39 | 52 | LESEEEGVSTAIR                 | R | E | 1,516.75 |
| 825 | CDC2 Putative uncharacterized protein DKFZp686L20222                                              | IPI00026689                                     | 34,762.10  | 39 | 52 | LESEEEGVSTAIR                 | R | E | 1,516.75 |
| 826 | SAE1 SUMO-activating enzyme subunit 1                                                             | IPI00033130,IPI00640965,IPI00647006             | 38,432.10  | 39 | 45 | VLLVGLK                       | R | G | 741.5234 |
| 827 | AASDHPPT L-aminoadipate-semialdehyde dehydrogenase-phosphopantetheinyl transferase                | IPI00250297                                     | 35,759.10  | 39 | 47 | SIQPEEKER                     | R | I | 1,115.57 |
| 828 | EIF3K Eukaryotic translation initiation factor 3 subunit K                                        | IPI00033143                                     | 25,042.40  | 39 | 52 | ENAYDLEANLAVLK                | K | L | 1,562.81 |
| 829 | RPL18 60S ribosomal protein L18                                                                   | IPI00215719                                     | 21,617.20  | 39 | 50 | TNSTFNQVVLKR                  | R | L | 1,406.78 |
| 830 | SSBP1 Single-stranded DNA-binding protein, mitochondrial                                          | IPI00029744                                     | 17,241.70  | 39 | 46 | VGQDPVLR                      | R | Q | 883.4997 |
| 831 | RPL18 60S ribosomal protein L18                                                                   | IPI00215719                                     | 21,617.20  | 39 | 49 | TNSTFNQVVLK                   | R | R | 1,250.67 |

|     |                                                                                                    |                                                 |           |    |    |                              |   |   |          |
|-----|----------------------------------------------------------------------------------------------------|-------------------------------------------------|-----------|----|----|------------------------------|---|---|----------|
| 832 | PSMA7 Isoform 1 of Proteasome subunit alpha type-1                                                 | IP100024175                                     | 27,869.10 | 39 | 48 | DIVVLGVEKK                   | R | S | 1,099.67 |
| 833 | PFN1 Profilin-1                                                                                    | IP100216691                                     | 15,036.30 | 39 | 56 | TFVNITPAEVGVLVGKDR           | K | S | 1,915.06 |
| 834 | PDCL3 Phosducin-like protein 3                                                                     | IP100031629                                     | 27,597.50 | 39 | 46 | ILQQSVVK                     | R | T | 914.567  |
| 835 | CDK6 Cell division protein kinase 6                                                                | IP100023529                                     | 36,920.80 | 39 | 44 | FVALKR                       | R | V | 733.4719 |
| 836 | TFRC Transferrin receptor protein 1                                                                | IP100022462                                     | 84,855.60 | 40 | 53 | LAVDEEENADNNTK               | K | A | 1,561.70 |
| 837 | TFRC Transferrin receptor protein 1                                                                | IP100022462                                     | 84,855.60 | 40 | 53 | LAVDEEENADNNTK               | K | A | 1,561.70 |
| 838 | PSMA1 Isoform Short of Proteasome subunit alpha type-1                                             | IP100016832,IP100472442                         | 29,538.00 | 40 | 51 | SKTHAVLVALKR                 | K | A | 1,322.83 |
| 839 | RPS25 40S ribosomal protein S25                                                                    | IP100012750                                     | 13,725.00 | 40 | 52 | VRDKLNNLVLFDK                | K | A | 1,573.91 |
| 840 | DCXR L-xylulose reductase                                                                          | IP100448095,IP100797249                         | 25,894.20 | 40 | 49 | TQADLDSLVR                   | R | E | 1,117.58 |
| 841 | COMMD4 Isoform 1 of COMM domain-containing protein 4                                               | IP100413500,IP100852907                         | 21,746.70 | 40 | 50 | ELLGQGIDYEK                  | K | I | 1,264.64 |
| 842 | NUDC Nuclear migration protein nudC                                                                | IP100550746                                     | 38,225.70 | 40 | 53 | TDDFFIGGEEGMAEK              | K | L | 1,546.67 |
| 843 | LOC389842 similar to RanBP1                                                                        | IP100399212,IP100414127,IP100878075,IP100878611 | 23,333.70 | 40 | 50 | TLEEDDEEELFK                 | K | M | 1,381.64 |
| 844 | C1orf122 hypothetical protein LOC127687                                                            | IP100829914                                     | 11,452.80 | 40 | 50 | AQQLLDAVEQR                  | R | Q | 1,270.68 |
| 845 | UCK2 Isoform 1 of Uridine-cytidine kinase 2                                                        | IP100065671                                     | 29,281.40 | 40 | 52 | IVQLLGQNEVDYR                | K | Q | 1,546.82 |
| 846 | SERBP1 Isoform 1 of Plasminogen activator inhibitor 1 RNA-binding protein                          | IP100410693,IP100412714,IP100470497,IP100470498 | 44,947.80 | 40 | 52 | EAGGGGVGGPGAK                | K | S | 1,013.50 |
| 847 | FKBP4 FK506-binding protein 4                                                                      | IP100219005                                     | 51,787.90 | 40 | 52 | EGTGTEMPMIGDR                | R | V | 1,425.60 |
| 848 | PHF19 Isoform 2 of PHD finger protein 19                                                           | IP100152220,IP100157837,IP100743344,IP100879928 | 22,494.10 | 40 | 49 | LTEGQYVLCR                   | K | W | 1,238.62 |
| 849 | RPL12 Isoform 1 of 60S ribosomal protein L12                                                       | IP100024933                                     | 17,801.10 | 41 | 48 | KVGDDIAK                     | K | A | 845.4729 |
| 850 | TUBA1A Tubulin alpha-1A chain                                                                      | IP100180675                                     | 50,117.70 | 41 | 64 | TIGGGDDSFNTFFSETGAGK         | K | A | 2,497.17 |
| 851 | TUBA1C Tubulin alpha-1C chain                                                                      | IP100218343                                     | 49,877.40 | 41 | 64 | HVPR<br>TIGGGDDSFNTFFSETGAGK | K | A | 2,497.17 |
| 852 | TUBA1B Tubulin alpha-1B chain                                                                      | IP100387144,IP100792677                         | 50,133.70 | 41 | 64 | HVPR<br>TIGGGDDSFNTFFSETGAGK | K | A | 2,497.17 |
| 853 | HEBP1 Heme-binding protein 1                                                                       | IP100148063                                     | 21,079.40 | 41 | 56 | FATVEVTDKPVDEALR             | K | E | 1,789.93 |
| 854 | APRT Adenine phosphoribosyltransferase                                                             | IP100218693,IP100642457                         | 19,590.50 | 41 | 48 | AAIGLLAR                     | R | H | 784.504  |
| 855 | TUBA1A Tubulin alpha-1A chain                                                                      | IP100180675                                     | 50,117.70 | 41 | 60 | TIGGGDDSFNTFFSETGAGK         | K | H | 2,007.89 |
| 856 | TUBA1A Tubulin alpha-1A chain                                                                      | IP100180675                                     | 50,117.70 | 41 | 60 | TIGGGDDSFNTFFSETGAGK         | K | H | 2,007.89 |
| 857 | TUBA1A Tubulin alpha-1A chain                                                                      | IP100180675                                     | 50,117.70 | 41 | 60 | TIGGGDDSFNTFFSETGAGK         | K | H | 2,007.89 |
| 858 | TUBA1A Tubulin alpha-1A chain                                                                      | IP100180675                                     | 50,117.70 | 41 | 60 | TIGGGDDSFNTFFSETGAGK         | K | H | 2,007.89 |
| 859 | TUBA1A Tubulin alpha-1A chain                                                                      | IP100180675                                     | 50,117.70 | 41 | 60 | TIGGGDDSFNTFFSETGAGK         | K | H | 2,007.89 |
| 860 | TUBA1A Tubulin alpha-1A chain                                                                      | IP100180675                                     | 50,117.70 | 41 | 60 | TIGGGDDSFNTFFSETGAGK         | K | H | 2,007.89 |
| 861 | TUBA1C Tubulin alpha-1C chain                                                                      | IP100218343                                     | 49,877.40 | 41 | 60 | TIGGGDDSFNTFFSETGAGK         | K | H | 2,007.89 |
| 862 | TUBA1B Tubulin alpha-1B chain                                                                      | IP100387144,IP100792677                         | 50,133.70 | 41 | 60 | TIGGGDDSFNTFFSETGAGK         | K | H | 2,007.89 |
| 863 | TUBA1B Tubulin alpha-1B chain                                                                      | IP100387144,IP100792677                         | 50,133.70 | 41 | 60 | TIGGGDDSFNTFFSETGAGK         | K | H | 2,007.89 |
| 864 | ADI1 Isoform 1 of 1,2-dihydroxy-3-keto-5-methylthiopentene dioxxygenase                            | IP100651738                                     | 21,481.20 | 41 | 54 | LDADKYENDPELEK               | K | I | 1,678.78 |
| 865 | LRRRC59 Leucine-rich repeat-containing protein 59                                                  | IP100396321                                     | 34,913.40 | 41 | 50 | ATILDLSCNK                   | K | L | 1,134.58 |
| 866 | NCAPH Condensin complex subunit 2                                                                  | IP100299507                                     | 82,547.10 | 41 | 64 | KAPLNIPGTPVLEDFPQNDDER       | R | L | 2,722.37 |
| 867 | BUB3 Mitotic checkpoint protein BUB3                                                               | IP100013468,IP100514701,IP100644108             | 37,136.70 | 41 | 50 | KER<br>LYDVPANSMR            | R | L | 1,181.56 |
| 868 | JUP Junction plakoglobin                                                                           | IP100554711                                     | 81,727.90 | 41 | 51 | GIMEEDEACGR                  | K | Q | 1,282.50 |
| 869 | FLOT1 Flotillin-1                                                                                  | IP100027438                                     | 47,336.80 | 41 | 51 | ISLNTLTLNVK                  | R | S | 1,215.73 |
| 870 | PRDX6 Peroxiredoxin-6                                                                              | IP100220301                                     | 25,018.10 | 42 | 53 | DFTPVCTTELGR                 | R | A | 1,395.66 |
| 871 | RPS25 40S ribosomal protein S25                                                                    | IP100012750                                     | 13,725.00 | 42 | 52 | DKLNNLVLFDK                  | R | A | 1,318.74 |
| 872 | RPS7 40S ribosomal protein S7                                                                      | IP100013415                                     | 22,109.50 | 42 | 58 | ELNITAAKEIEVGGGRK            | R | A | 1,784.99 |
| 873 | RPS19 40S ribosomal protein S19                                                                    | IP100215780                                     | 16,042.50 | 42 | 56 | HKELAPYDENWFYTR              | K | A | 1,968.92 |
| 874 | PSMA1 Isoform Short of Proteasome subunit alpha type-1                                             | IP100016832,IP100472442                         | 29,538.00 | 42 | 51 | THAVLVALKR                   | K | A | 1,107.70 |
| 875 | MORF4L1 cDNA FLJ38504 fis, clone HCHON2000156, highly similar to Mortality factor 4-like protein 1 | IP100550968                                     | 40,011.50 | 42 | 54 | VLCFHGPLLYEAK                | R | C | 1,546.81 |

|     |                                                                                |                                                                                                                                                                                                                                                                         |            |    |    |                                 |   |   |          |
|-----|--------------------------------------------------------------------------------|-------------------------------------------------------------------------------------------------------------------------------------------------------------------------------------------------------------------------------------------------------------------------|------------|----|----|---------------------------------|---|---|----------|
| 876 | LSM4 U6 snRNA-associated Sm-like protein LSM4                                  | IP100294955                                                                                                                                                                                                                                                             | 15,332.00  | 42 | 48 | EVICTSR                         | R | D | 864.4244 |
| 877 | GNB2L1 38 kDa protein                                                          | IP100641950,IP100848226                                                                                                                                                                                                                                                 | 37,740.10  | 42 | 65 | GHNGVWTQIATTPQFPDMILS<br>ASR    | K | D | 2,643.30 |
| 878 | RPS7 40S ribosomal protein S7                                                  | IP100013415                                                                                                                                                                                                                                                             | 22,109.50  | 42 | 49 | ELNITAAK                        | R | E | 859.4884 |
| 879 | HIST2H3A;HIST2H3D;HIST2H3C Histone H3.2                                        | IP100171611,IP100219038,IP100465070,IP100909530                                                                                                                                                                                                                         | 15,370.70  | 42 | 50 | YRPGTVALR                       | R | E | 1,032.59 |
| 880 | HIST2H3A;HIST2H3D;HIST2H3C Histone H3.2                                        | IP100171611,IP100219038,IP100465070,IP100909530                                                                                                                                                                                                                         | 15,370.70  | 42 | 50 | YRPGTVALR                       | R | E | 1,032.59 |
| 881 | EEF1A2 Elongation factor 1-alpha 2                                             | IP100014424                                                                                                                                                                                                                                                             | 50,452.60  | 42 | 51 | FEKEAAEMGK                      | K | G | 1,139.54 |
| 882 | EEF1A1 Elongation factor 1-alpha 1                                             | IP100396485                                                                                                                                                                                                                                                             | 50,123.20  | 42 | 51 | FEKEAAEMGK                      | K | G | 1,139.54 |
| 883 | HSP90AB1 Heat shock protein HSP 90-beta                                        | IP100414676                                                                                                                                                                                                                                                             | 83,249.30  | 42 | 53 | ELISNASDALDK                    | R | I | 1,275.64 |
| 884 | CHMP2A Charged multivesicular body protein 2a                                  | IP100004416                                                                                                                                                                                                                                                             | 25,087.00  | 42 | 49 | KIADIKK                         | K | M | 928.6192 |
| 885 | FASN Fatty acid synthase                                                       | IP100026781                                                                                                                                                                                                                                                             | 273,382.00 | 42 | 49 | AGLYGLPR                        | K | R | 846.4833 |
| 886 | RAB11B Ras-related protein Rab-11B                                             | IP100202436                                                                                                                                                                                                                                                             | 24,471.00  | 42 | 51 | STIGVEFATR                      | K | S | 1,080.57 |
| 887 | HSP90AB1 Heat shock protein HSP 90-beta                                        | IP100414676                                                                                                                                                                                                                                                             | 83,249.30  | 42 | 55 | ELISNASDALDKIR                  | R | Y | 1,544.83 |
| 888 | EEF2 Elongation factor 2                                                       | IP100186290                                                                                                                                                                                                                                                             | 95,322.10  | 43 | 50 | AGIIASAR                        | K | A | 758.4519 |
| 889 | SRP14 Signal recognition particle 14 kDa protein                               | IP100293434                                                                                                                                                                                                                                                             | 14,552.60  | 43 | 59 | KGTVEGFEPADNKLLR                | K | A | 1,933.98 |
| 890 | SRP14 Signal recognition particle 14 kDa protein                               | IP100293434                                                                                                                                                                                                                                                             | 14,552.60  | 43 | 55 | KGTVEGFEPADNK                   | K | C | 1,391.68 |
| 891 | SEC22B Vesicle-trafficking protein SEC22b                                      | IP100006865                                                                                                                                                                                                                                                             | 24,723.40  | 43 | 51 | KLNEQSPTR                       | R | C | 1,072.57 |
| 892 | RPS13 40S ribosomal protein S13                                                | IP100221089                                                                                                                                                                                                                                                             | 17,205.30  | 43 | 55 | KGLTPSQIGVILR                   | K | D | 1,381.85 |
| 893 | RPS26;LOC728937 40S ribosomal protein S26                                      | IP100655650,IP100902801                                                                                                                                                                                                                                                 | 12,997.50  | 43 | 51 | NIVEAAAVR                       | R | D | 942.5366 |
| 894 | MRPL11 39S ribosomal protein L11, mitochondrial                                | IP100007001,IP100333848                                                                                                                                                                                                                                                 | 20,665.90  | 43 | 51 | GVSINQFCK                       | R | E | 1,052.52 |
| 895 | RDH11 Isoform 1 of Retinol dehydrogenase 11                                    | IP100339384                                                                                                                                                                                                                                                             | 35,368.50  | 43 | 55 | VVVVTGANTGIGK                   | K | E | 1,214.71 |
| 896 | RDH11 Isoform 1 of Retinol dehydrogenase 11                                    | IP100339384                                                                                                                                                                                                                                                             | 35,368.50  | 43 | 59 | VVVVTGANTGIGKETAK               | K | E | 1,643.93 |
| 897 | CBR1 Carbonyl reductase [NADPH] 1                                              | IP100295386                                                                                                                                                                                                                                                             | 30,356.80  | 43 | 58 | GQAAVQQLQAEGLSPR                | R | F | 1,652.87 |
| 898 | ALDOA Fructose-bisphosphate aldolase A                                         | IP100465439                                                                                                                                                                                                                                                             | 39,402.60  | 43 | 57 | RLQSIGTENTEENRR                 | K | F | 1,802.91 |
| 899 | RPL10 60S ribosomal protein L10                                                | IP100554723,IP100646899,IP100853161                                                                                                                                                                                                                                     | 24,586.60  | 43 | 69 | VDFPLPCGHMVSDEYEQLSS<br>EALAAAR | K | I | 3,098.37 |
| 900 | ANAPC7 anaphase-promoting complex subunit 7                                    | IP100008248,IP100915282                                                                                                                                                                                                                                                 | 66,839.70  | 43 | 54 | DMAAAGLHSNVR                    | R | L | 1,257.60 |
| 901 | UBB;RPS27A;UBC ubiquitin and ribosomal protein S27a precursor                  | IP100179330,IP100456429,IP100719280,IP100743241,IP100743650,IP100744274,IP100784990,IP100789107,IP100789823,IP100790633,IP100792712,IP100793330,IP100793729,IP100793810,IP100794211,IP100794925,IP100795527,IP100796007,IP100796600,IP100797400,IP100798127,IP100798155 | 17,947.60  | 43 | 48 | LIFAGK                          | R | Q | 648.408  |
| 902 | UBB;RPS27A;UBC ubiquitin and ribosomal protein S27a precursor                  | IP100179330,IP100456429,IP100719280,IP100743241,IP100743650,IP100744274,IP100784990,IP100789107,IP100789823,IP100790633,IP100792712,IP100793330,IP100793729,IP100793810,IP100794211,IP100794925,IP100795527,IP100796007,IP100796600,IP100797400,IP100798127,IP100798155 | 17,947.60  | 43 | 48 | LIFAGK                          | R | Q | 648.408  |
| 903 | HN1L Isoform 1 of Hematological and neurological expressed 1-like protein      | IP100027397,IP100909195                                                                                                                                                                                                                                                 | 20,045.60  | 43 | 59 | MASNIFGPTEEPQNIPK               | R | R | 1,888.91 |
| 904 | HN1L Isoform 1 of Hematological and neurological expressed 1-like protein      | IP100027397,IP100909195                                                                                                                                                                                                                                                 | 20,045.60  | 43 | 59 | MASNIFGPTEEPQNIPK               | R | R | 1,888.91 |
| 905 | YWHAE 14-3-3 protein epsilon                                                   | IP100000816                                                                                                                                                                                                                                                             | 29,157.00  | 43 | 56 | NLLSVAYKNVIGAR                  | R | R | 1,517.88 |
| 906 | LMNB1 Lamin-B1                                                                 | IP100217975                                                                                                                                                                                                                                                             | 66,391.60  | 43 | 51 | LAVYIDKVR                       | R | S | 1,076.65 |
| 907 | KPNB1 Importin subunit beta-1                                                  | IP100001639                                                                                                                                                                                                                                                             | 97,153.30  | 43 | 54 | VLANPGNSQVAR                    | R | V | 1,225.66 |
| 908 | KPNB1 Importin subunit beta-1                                                  | IP100001639                                                                                                                                                                                                                                                             | 97,153.30  | 43 | 54 | VLANPGNSQVAR                    | R | V | 1,225.66 |
| 909 | RPS19 40S ribosomal protein S19                                                | IP100215780                                                                                                                                                                                                                                                             | 16,042.50  | 44 | 56 | ELAPYDENWFYTR                   | K | A | 1,703.77 |
| 910 | SAPS3 Isoform 6 of Serine/threonine-protein phosphatase 6 regulatory subunit 3 | IP100030624,IP100719553,IP100719725,IP100719821                                                                                                                                                                                                                         | 94,429.00  | 44 | 50 | LIEFLK                          | K | A | 875.5602 |
| 911 | RPS25 40S ribosomal protein S25                                                | IP100012750                                                                                                                                                                                                                                                             | 13,725.00  | 44 | 52 | LNNLVLFDK                       | K | A | 1,075.61 |
| 912 | RPS25 40S ribosomal protein S25                                                | IP100012750                                                                                                                                                                                                                                                             | 13,725.00  | 44 | 52 | LNNLVLFDK                       | K | A | 1,075.61 |
| 913 | SRP14 Signal recognition particle 14 kDa protein                               | IP100293434                                                                                                                                                                                                                                                             | 14,552.60  | 44 | 55 | GTVEGFEPADNK                    | K | C | 1,263.59 |
| 914 | RPS13 40S ribosomal protein S13                                                | IP100221089                                                                                                                                                                                                                                                             | 17,205.30  | 44 | 55 | GLTPSQIGVILR                    | K | D | 1,253.76 |
| 915 | SFRS3 Splicing factor, arginine/serine-rich 3                                  | IP100010204,IP100843996                                                                                                                                                                                                                                                 | 19,312.00  | 44 | 64 | NPPGFVFEFEDPRDAADAV<br>R        | R | E | 2,320.10 |
| 916 | EXOSC1 3'-5' exoribonuclease CSL4 homolog                                      | IP100032823,IP100552886,IP100642493                                                                                                                                                                                                                                     | 21,433.50  | 44 | 57 | SSENGALPVVSVVR                  | K | E | 1,413.77 |
| 917 | ALDOA Fructose-bisphosphate aldolase A                                         | IP100465439                                                                                                                                                                                                                                                             | 39,402.60  | 44 | 57 | LQSIGTENTEENRR                  | R | F | 1,646.81 |
| 918 | UHRF1 ubiquitin-like with PHD and ring finger domains 1 isoform 2              | IP100797279,IP100797945                                                                                                                                                                                                                                                 | 91,082.30  | 44 | 57 | KIQELFHVEPGLQR                  | R | L | 1,693.94 |

|     |                                                                         |                                                                                                                                     |           |    |    |                                                  |   |   |          |
|-----|-------------------------------------------------------------------------|-------------------------------------------------------------------------------------------------------------------------------------|-----------|----|----|--------------------------------------------------|---|---|----------|
| 919 | TCP1 T-complex protein 1 subunit alpha                                  | IP100290566                                                                                                                         | 60,327.20 | 44 | 63 | MLVDDIGDVTITNDGATILK                             | K | L | 2,120.08 |
| 920 | RPL34 60S ribosomal protein L34                                         | IP100219160                                                                                                                         | 13,275.10 | 44 | 52 | SACGVCPGR                                        | K | L | 963.4136 |
| 921 | TPI1 Isoform 1 of Triosephosphate isomerase                             | IP100465028                                                                                                                         | 30,772.80 | 44 | 51 | FFVGGNWK                                         | K | M | 954.4832 |
| 922 | ILF2 Interleukin enhancer-binding factor 2                              | IP100005198,IP100872107                                                                                                             | 43,044.70 | 44 | 60 | VKPAPDETSFSEALLKR                                | R | N | 1,888.02 |
| 923 | PPAT Amidophosphoribosyltransferase                                     | IP100029534                                                                                                                         | 57,381.30 | 44 | 62 | GQESAGIVTSDGSSVPTFK                              | R | S | 1,866.91 |
| 924 | PKM2 Isoform M1 of Pyruvate kinase isozymes M1/M2                       | IP100220644,IP100479186                                                                                                             | 58,044.60 | 44 | 56 | NTGIICTIGPASR                                    | R | S | 1,359.71 |
| 925 | PKM2 Isoform M1 of Pyruvate kinase isozymes M1/M2                       | IP100220644,IP100479186                                                                                                             | 58,044.60 | 44 | 56 | NTGIICTIGPASR                                    | R | S | 1,359.71 |
| 926 | C10orf58 Uncharacterized protein C10orf58                               | IP100296190,IP100646289,IP100646889                                                                                                 | 25,747.50 | 44 | 55 | AALEYLEDIDLK                                     | K | T | 1,392.73 |
| 927 | TSTA3 GDP-L-fucose synthetase                                           | IP100014361,IP100791788,IP100909958                                                                                                 | 35,874.60 | 45 | 55 | DADLTDTAQTR                                      | K | A | 1,206.56 |
| 928 | HIST3H2BB Histone H2B type 3-B                                          | IP100166293                                                                                                                         | 13,890.60 | 45 | 58 | VLKQVHPDTGISSK                                   | K | A | 1,508.84 |
| 929 | H2BFS Histone H2B type F-S                                              | IP100477495,IP100816252                                                                                                             | 13,926.60 | 45 | 58 | VLKQVHPDTGISSK                                   | K | A | 1,508.84 |
| 930 | HIST1H2BJ Histone H2B type 1-J                                          | IP100515061                                                                                                                         | 13,886.70 | 45 | 58 | VLKQVHPDTGISSK                                   | K | A | 1,508.84 |
| 931 | PTP4A2 Isoform 1 of Protein tyrosine phosphatase type IVA 2             | IP100020191                                                                                                                         | 19,109.30 | 45 | 57 | VCDATYDKAPVEK                                    | R | E | 1,495.71 |
| 932 | DNM2 Isoform 1 of Dynamin-2                                             | IP100033022,IP100181352,IP100218889,IP100413140,IP100457139,IP100514550,IP100657691,IP100816287,IP100887273,IP100888758,IP100026302 | 98,049.90 | 45 | 59 | SSVLENFVGRDFLPR                                  | K | G | 1,735.91 |
| 933 | RPL31 60S ribosomal protein L31                                         | IP100015947                                                                                                                         | 14,445.20 | 45 | 50 | ALKEIR                                           | R | K | 729.4618 |
| 934 | DNAJB1 DnaJ homolog subfamily B member 1                                | IP100015947                                                                                                                         | 38,027.60 | 45 | 59 | FKEIAEAYDVLSDPR                                  | K | K | 1,752.88 |
| 935 | RPL30 60S ribosomal protein L30                                         | IP100219156,IP100872940                                                                                                             | 12,766.70 | 45 | 56 | LVILANNCPLR                                      | K | K | 1,353.77 |
| 936 | TARS Threonyl-tRNA synthetase, cytoplasmic                              | IP100329633,IP100908949                                                                                                             | 83,419.80 | 45 | 57 | AELNPWPEYIYTR                                    | R | L | 1,651.81 |
| 937 | ATP6V1A V-type proton ATPase catalytic subunit A                        | IP100007682                                                                                                                         | 68,287.40 | 45 | 56 | VGHSELVGEIIR                                     | R | L | 1,308.73 |
| 938 | TTL3;ARPC4 Actin-related protein 2/3 complex subunit 4                  | IP100554811,IP100790262                                                                                                             | 19,649.40 | 45 | 55 | ELLLQPVTISR                                      | K | N | 1,268.76 |
| 939 | AP2M1 Isoform 1 of AP-2 complex subunit mu-1                            | IP100022256,IP100619900,IP100798379                                                                                                 | 49,637.70 | 45 | 52 | SPVTNIAR                                         | R | T | 857.4839 |
| 940 | FAM98A Protein FAM98A                                                   | IP100174442,IP100872161                                                                                                             | 55,383.40 | 45 | 54 | LCAWLVSELR                                       | K | V | 1,246.66 |
| 941 | AURKB Serine/threonine-protein kinase 12                                | IP100176642,IP100796914                                                                                                             | 39,263.50 | 45 | 56 | SNVQPTAAPGQK                                     | R | V | 1,197.62 |
| 942 | EIF4A1 Eukaryotic initiation factor 4A-I                                | IP100025491,IP100871852                                                                                                             | 46,137.30 | 46 | 61 | GIYAYGFKEKPSAIQQR                                | R | A | 1,827.94 |
| 943 | CXorf38 Isoform 1 of Uncharacterized protein CXorf38                    | IP100152089,IP100552646,IP100910523                                                                                                 | 36,651.50 | 46 | 57 | GLLAAAPGLGPR                                     | R | A | 1,092.65 |
| 944 | AP1S1 Isoform 1 of AP-1 complex subunit sigma-1A                        | IP100152898                                                                                                                         | 18,715.90 | 46 | 53 | MCSFLEWR                                         | K | D | 1,144.49 |
| 945 | GSTP1 Glutathione S-transferase P                                       | IP100219757                                                                                                                         | 23,338.70 | 46 | 55 | ASCLYQLPK                                        | K | F | 1,136.58 |
| 946 | PSMB4 Proteasome subunit beta type-4                                    | IP100555956                                                                                                                         | 29,187.00 | 46 | 60 | TQNPMVTGTSVLGVK                                  | R | F | 1,547.81 |
| 947 | PSMB4 Proteasome subunit beta type-4                                    | IP100555956                                                                                                                         | 29,187.00 | 46 | 60 | TQNPMVTGTSVLGVK                                  | R | F | 1,547.81 |
| 948 | TAF9B;LOC728198 Transcription initiation factor TFIID subunit 9B        | IP100642105                                                                                                                         | 27,604.50 | 46 | 55 | YVTILDDAK                                        | R | I | 1,138.60 |
| 949 | DNAJB6 Isoform A of DnaJ homolog subfamily B member 6                   | IP100024523                                                                                                                         | 36,070.20 | 46 | 60 | FKQVAEAYEVLSDAK                                  | K | K | 1,697.87 |
| 950 | DNAJB6 Isoform A of DnaJ homolog subfamily B member 6                   | IP100024523                                                                                                                         | 36,070.20 | 46 | 60 | FKQVAEAYEVLSDAK                                  | K | K | 1,697.87 |
| 951 | UFD1L Isoform Short of Ubiquitin fusion degradation protein 1 homolog   | IP100218292,IP100655754,IP100873326                                                                                                 | 34,483.20 | 46 | 58 | IIMPPSALDQLSR                                    | K | L | 1,456.78 |
| 952 | UBE2M NEDD8-conjugating enzyme Ubc12                                    | IP100022597                                                                                                                         | 20,882.90 | 46 | 61 | TCDISFSDPDDLNFK                                  | K | L | 1,886.85 |
| 953 | NUBP2 Nucleotide-binding protein 2                                      | IP100644674,IP100872338                                                                                                             | 28,807.30 | 46 | 60 | VGILDVLCGPSIPR                                   | K | M | 1,610.86 |
| 954 | DFFA Isoform DFF45 of DNA fragmentation factor subunit alpha (Fragment) | IP100010882                                                                                                                         | 36,504.50 | 46 | 54 | ACDILAIDK                                        | K | S | 1,018.52 |
| 955 | SRM Spermidine synthase                                                 | IP100292020                                                                                                                         | 33,806.50 | 46 | 55 | SRYQDILVFR                                       | R | S | 1,296.71 |
| 956 | FDFT1 Squalene synthetase                                               | IP100020944,IP100908715                                                                                                             | 48,098.40 | 46 | 52 | YLNQTSR                                          | K | S | 881.4475 |
| 957 | NPM1 Isoform 2 of Nucleophosmin                                         | IP100220740,IP100549248                                                                                                             | 29,446.90 | 46 | 73 | TVSLGAGAKDELHIVEAEAMN<br>YEGSPIK<br>LKPVHGLIFLFK | R | V | 2,929.46 |
| 958 | UCHL5 Isoform 2 of Ubiquitin carboxyl-terminal hydrolase isozyme L5     | IP100219512,IP100219513,IP100299313,IP100549820,IP100549849,IP100641843,IP100642374                                                 | 36,061.70 | 46 | 57 | YEGSPIK<br>LKPVHGLIFLFK                          | K | W | 1,411.88 |
| 959 | EIF4A2 Isoform 1 of Eukaryotic initiation factor 4A-II                  | IP100328328,IP100409717                                                                                                             | 46,385.60 | 47 | 62 | GIYAYGFKEKPSAIQQR                                | R | A | 1,827.94 |
| 960 | DDRGK1 Isoform 1 of Uncharacterized protein C20orf116                   | IP100028387                                                                                                                         | 35,593.00 | 47 | 59 | VAQGPPEPEPR                                      | R | A | 1,418.73 |

|     |                                                                                                                                         |                         |           |    |    |                      |   |   |          |
|-----|-----------------------------------------------------------------------------------------------------------------------------------------|-------------------------|-----------|----|----|----------------------|---|---|----------|
| 961 | ACTR1A Alpha-centractin                                                                                                                 | IPI00029468,IPI00908883 | 42,597.20 | 47 | 61 | VMAGALEGDIFIGPK      | R | A | 1,533.80 |
| 962 | MCTS1 Isoform 1 of Malignant T cell amplified sequence 1                                                                                | IPI00179026             | 20,537.90 | 47 | 54 | KDPVKIVR             | K | C | 954.6096 |
| 963 | DDOST dolichyl-diphosphooligosaccharide-protein glycosyltransferase precursor                                                           | IPI00297084,IPI00910419 | 50,784.50 | 47 | 57 | TLVLLDNLNVR          | R | E | 1,269.75 |
| 964 | CDK6 Cell division protein kinase 6                                                                                                     | IPI00023529             | 36,920.80 | 47 | 60 | VQTGEEGMPLSTIR       | R | E | 1,533.76 |
| 965 | HIST1H4H;HIST2H4A;HIST4H4;HIST1H4F;HIST1H4D;HIST1H4K;HIST1H4C;HIST1H4J;HIST1H4A;HIST1H4I;HIST1H4B;HIST2H4B;HIST1H4E;HIST1H4I Histone H4 | IPI00453473             | 11,349.70 | 47 | 56 | ISGLIYEETR           | R | G | 1,180.62 |
| 966 | HIST1H4H;HIST2H4A;HIST4H4;HIST1H4F;HIST1H4D;HIST1H4K;HIST1H4C;HIST1H4J;HIST1H4A;HIST1H4I;HIST1H4B;HIST2H4B;HIST1H4E;HIST1H4I Histone H4 | IPI00453473             | 11,349.70 | 47 | 56 | ISGLIYEETR           | R | G | 1,180.62 |
| 967 | HIST1H4H;HIST2H4A;HIST4H4;HIST1H4F;HIST1H4D;HIST1H4K;HIST1H4C;HIST1H4J;HIST1H4A;HIST1H4I;HIST1H4B;HIST2H4B;HIST1H4E;HIST1H4I Histone H4 | IPI00453473             | 11,349.70 | 47 | 56 | ISGLIYEETR           | R | G | 1,180.62 |
| 968 | HIST1H4H;HIST2H4A;HIST4H4;HIST1H4F;HIST1H4D;HIST1H4K;HIST1H4C;HIST1H4J;HIST1H4A;HIST1H4I;HIST1H4B;HIST2H4B;HIST1H4E;HIST1H4I Histone H4 | IPI00453473             | 11,349.70 | 47 | 56 | ISGLIYEETR           | R | G | 1,180.62 |
| 969 | HIST1H4H;HIST2H4A;HIST4H4;HIST1H4F;HIST1H4D;HIST1H4K;HIST1H4C;HIST1H4J;HIST1H4A;HIST1H4I;HIST1H4B;HIST2H4B;HIST1H4E;HIST1H4I Histone H4 | IPI00453473             | 11,349.70 | 47 | 56 | ISGLIYEETR           | R | G | 1,180.62 |
| 970 | HIST1H4H;HIST2H4A;HIST4H4;HIST1H4F;HIST1H4D;HIST1H4K;HIST1H4C;HIST1H4J;HIST1H4A;HIST1H4I;HIST1H4B;HIST2H4B;HIST1H4E;HIST1H4I Histone H4 | IPI00453473             | 11,349.70 | 47 | 56 | ISGLIYEETR           | R | G | 1,180.62 |
| 971 | HIST1H4H;HIST2H4A;HIST4H4;HIST1H4F;HIST1H4D;HIST1H4K;HIST1H4C;HIST1H4J;HIST1H4A;HIST1H4I;HIST1H4B;HIST2H4B;HIST1H4E;HIST1H4I Histone H4 | IPI00453473             | 11,349.70 | 47 | 56 | ISGLIYEETR           | R | G | 1,180.62 |
| 972 | OCIAD1 Isoform 1 of OCIA domain-containing protein 1                                                                                    | IPI00016405             | 27,608.80 | 47 | 64 | SVPLAATSMILITQGLISK  | R | G | 1,846.04 |
| 973 | PCBP2 poly(rC) binding protein 2 isoform b                                                                                              | IPI00012066,IPI00790627 | 38,204.50 | 47 | 57 | INISEGNCPER          | R | I | 1,288.60 |
| 974 | PCBP2 poly(rC) binding protein 2 isoform b                                                                                              | IPI00012066,IPI00790627 | 38,204.50 | 47 | 57 | INISEGNCPER          | R | I | 1,288.60 |
| 975 | PCBP2 poly(rC) binding protein 2 isoform b                                                                                              | IPI00012066,IPI00790627 | 38,204.50 | 47 | 57 | INISEGNCPER          | R | I | 1,288.60 |
| 976 | PCBP2 poly(rC) binding protein 2 isoform b                                                                                              | IPI00012066,IPI00790627 | 38,204.50 | 47 | 57 | INISEGNCPER          | R | I | 1,288.60 |
| 977 | PCBP1 Poly(rC)-binding protein 1                                                                                                        | IPI00016610             | 37,480.20 | 47 | 57 | INISEGNCPER          | R | I | 1,288.60 |
| 978 | PCBP1 Poly(rC)-binding protein 1                                                                                                        | IPI00016610             | 37,480.20 | 47 | 57 | INISEGNCPER          | R | I | 1,288.60 |
| 979 | PCBP1 Poly(rC)-binding protein 1                                                                                                        | IPI00016610             | 37,480.20 | 47 | 57 | INISEGNCPER          | R | I | 1,288.60 |
| 980 | PCBP1 Poly(rC)-binding protein 1                                                                                                        | IPI00016610             | 37,480.20 | 47 | 57 | INISEGNCPER          | R | I | 1,288.60 |
| 981 | PCBP1 Poly(rC)-binding protein 1                                                                                                        | IPI00016610             | 37,480.20 | 47 | 57 | INISEGNCPER          | R | I | 1,288.60 |
| 982 | CHMP1A Isoform 1 of Charged multivesicular body protein 1a                                                                              | IPI00382452             | 21,684.50 | 47 | 54 | VYAENAIR             | R | K | 935.4944 |
| 983 | C16orf14 Isoform 1 of Uncharacterized protein C16orf14                                                                                  | IPI00042604             | 17,809.50 | 47 | 65 | AQPFAQPWPWPLSSPGPR   | R | L | 1,987.02 |
| 984 | EIF1AX;EIF1AP1 Eukaryotic translation initiation factor 1A, X-chromosomal                                                               | IPI00232533             | 16,443.30 | 47 | 57 | LEAMCFDGVKR          | R | L | 1,341.63 |
| 985 | EIF1AX;EIF1AP1 Eukaryotic translation initiation factor 1A, X-chromosomal                                                               | IPI00232533             | 16,443.30 | 47 | 56 | LEAMCFDGVK           | R | R | 1,185.53 |
| 986 | HNRNPL Heterogeneous nuclear ribonucleoprotein L                                                                                        | IPI00027834             | 64,114.80 | 47 | 59 | YGGGSEGGRAPK         | R | R | 1,298.61 |
| 987 | PSMD6 26S proteasome non-ATPase regulatory subunit 6                                                                                    | IPI00014151             | 45,515.40 | 47 | 59 | DNNMAPYYEALCK        | R | S | 1,604.67 |
| 988 | RUVBL1 Isoform 1 of RuvB-like 1                                                                                                         | IPI00021187             | 50,211.40 | 47 | 57 | EACGVIVELIK          | R | S | 1,230.68 |
| 989 | ACTR2 Actin-related protein 2                                                                                                           | IPI00005159             | 44,743.70 | 47 | 65 | VGNIEIKDLMVGDEASELR  | K | S | 2,104.06 |
| 990 | RFC5 Replication factor C subunit 5                                                                                                     | IPI00031514,IPI00373883 | 38,480.40 | 47 | 66 | FINEDRLPHLLLYGPPGTGK | K | T | 2,237.21 |



|      |                                                                                                                                         |                                                                         |           |    |    |                       |   |   |          |
|------|-----------------------------------------------------------------------------------------------------------------------------------------|-------------------------------------------------------------------------|-----------|----|----|-----------------------|---|---|----------|
| 991  | DRG1 Developmentally-regulated GTP-binding protein 1                                                                                    | IPI00031836                                                             | 40,525.80 | 47 | 61 | GGGGGGPGEGFDVAK       | K | T | 1,261.58 |
| 992  | MCL1 Isoform 1 of Induced myeloid leukemia cell differentiation protein Mcl-1                                                           | IPI00030356                                                             | 37,320.20 | 47 | 75 | EIGGGEAGAVIGGSAGASPPS | R | V | 2,667.33 |
| 993  | HIST1H4H;HIST2H4A;HIST4H4;HIST1H4F;HIST1H4D;HIST1H4K;HIST1H4C;HIST1H4J;HIST1H4A;HIST1H4I;HIST1H4B;HIST2H4B;HIST1H4E;HIST1H4I Histone H4 | IPI00453473                                                             | 11,349.70 | 47 | 60 | ISGLIYEETRGLVK        | R | V | 1,577.89 |
| 994  | CDKN2A Cyclin-dependent kinase inhibitor                                                                                                | IPI00001560                                                             | 17,865.30 | 47 | 58 | RPIQVMMMSGAR          | R | V | 1,424.68 |
| 995  | PELO Protein pelota homolog                                                                                                             | IPI00106698                                                             | 43,358.40 | 47 | 60 | VQTESSTGSGVSNR        | K | V | 1,408.67 |
| 996  | TUBB2C Tubulin beta-2C chain                                                                                                            | IPI00007752                                                             | 49,812.70 | 47 | 58 | INVYYNEATGGK          | R | Y | 1,328.65 |
| 997  | TUBB2C Tubulin beta-2C chain                                                                                                            | IPI00007752                                                             | 49,812.70 | 47 | 58 | INVYYNEATGGK          | R | Y | 1,328.65 |
| 998  | TUBB2C Tubulin beta-2C chain                                                                                                            | IPI00007752                                                             | 49,812.70 | 47 | 58 | INVYYNEATGGK          | R | Y | 1,328.65 |
| 999  | - cDNA FLJ52712, highly similar to Tubulin beta-6 chain                                                                                 | IPI00908469                                                             | 46,683.90 | 47 | 58 | INVYYNESSSQK          | R | Y | 1,431.67 |
| 1000 | TUBB Tubulin beta chain                                                                                                                 | IPI00011654                                                             | 49,652.60 | 47 | 58 | ISVYYNEATGGK          | R | Y | 1,301.64 |
| 1001 | TUBB Tubulin beta chain                                                                                                                 | IPI00011654                                                             | 49,652.60 | 47 | 58 | ISVYYNEATGGK          | R | Y | 1,301.64 |
| 1002 | TUBB Tubulin beta chain                                                                                                                 | IPI00011654                                                             | 49,652.60 | 47 | 58 | ISVYYNEATGGK          | R | Y | 1,301.64 |
| 1003 | TUBB Tubulin beta chain                                                                                                                 | IPI00011654                                                             | 49,652.60 | 47 | 58 | ISVYYNEATGGK          | R | Y | 1,301.64 |
| 1004 | TUBB Tubulin beta chain                                                                                                                 | IPI00011654                                                             | 49,652.60 | 47 | 58 | ISVYYNEATGGK          | R | Y | 1,301.64 |
| 1005 | RBM3 Putative RNA-binding protein 3                                                                                                     | IPI00024320                                                             | 17,152.60 | 48 | 65 | GFGFITFTNPEHASVAMR    | R | A | 1,981.96 |
| 1006 | RPL7 60S ribosomal protein L7                                                                                                           | IPI00030179,IPI00472171,IPI00871827                                     | 29,209.70 | 48 | 53 | KLIYEK                | R | A | 793.4819 |
| 1007 | HIST3H2BB Histone H2B type 3-B                                                                                                          | IPI00166293                                                             | 13,890.60 | 48 | 58 | QVHPDTGISSK           | K | A | 1,168.60 |
| 1008 | H2BFS Histone H2B type F-S                                                                                                              | IPI00477495,IPI00816252                                                 | 13,926.60 | 48 | 58 | QVHPDTGISSK           | K | A | 1,168.60 |
| 1009 | HIST1H2BJ Histone H2B type 1-J                                                                                                          | IPI00515061                                                             | 13,886.70 | 48 | 58 | QVHPDTGISSK           | K | A | 1,168.60 |
| 1010 | AASDHPT L-aminoadipate-semialdehyde dehydrogenase-phosphopantetheinyl transferase                                                       | IPI00029267                                                             | 25,469.50 | 48 | 57 | MRGQAFVIFK            | K | E | 1,212.66 |
| 1011 | SNRPB2 U2 small nuclear ribonucleoprotein B"                                                                                            | IPI00024523                                                             | 36,070.20 | 48 | 60 | QVAEAYEVLSDAK         | K | K | 1,422.71 |
| 1013 | BXDC1 Brix domain-containing protein 1                                                                                                  | IPI00396329                                                             | 35,567.50 | 48 | 56 | VLKDVYALK             | K | K | 1,048.64 |
| 1014 | PEBP1 Phosphatidylethanolamine-binding protein 1                                                                                        | IPI00219446                                                             | 21,038.90 | 48 | 62 | NRPTSISWDGLDSGK       | K | L | 1,632.80 |
| 1015 | NAT13 Isoform 1 of N-acetyltransferase 13                                                                                               | IPI00018627                                                             | 19,380.90 | 48 | 62 | LAYFNDAVAVCCR         | K | V | 1,728.82 |
| 1016 | NAT13 Isoform 1 of N-acetyltransferase 13                                                                                               | IPI00018627                                                             | 19,380.90 | 48 | 62 | LAYFNDAVAVCCR         | K | V | 1,728.82 |
| 1017 | TFG Protein TFG                                                                                                                         | IPI00294619,IPI00297452,IPI00788849,IPI00790186,IPI00790804,IPI00796921 | 43,416.20 | 48 | 57 | LLSNDEVTIK            | K | Y | 1,131.63 |
| 1018 | PARK7 Protein DJ-1                                                                                                                      | IPI00298547                                                             | 19,873.10 | 49 | 63 | DVVICPDASLEDAKK       | R | E | 1,659.83 |
| 1019 | RAB7A Ras-related protein Rab-7a                                                                                                        | IPI00016342                                                             | 23,472.00 | 49 | 69 | EVMVDDRRLVTMQIWDTAGQE | K | F | 2,524.18 |
| 1020 | C6orf108 c-Myc-responsive protein Rcl                                                                                                   | IPI00007926                                                             | 19,090.30 | 49 | 65 | FGTVLTEHVAAAELGAR     | R | G | 1,741.92 |
| 1021 | RPL23 60S ribosomal protein L23                                                                                                         | IPI00010153,IPI00795408                                                 | 14,847.90 | 49 | 67 | LNRLPAAGVGDMVMATVKK   | R | G | 2,003.08 |
| 1022 | SNRPD1 Small nuclear ribonucleoprotein Sm D1                                                                                            | IPI00302850,IPI00903286                                                 | 13,263.90 | 49 | 61 | NREPQLETLSIR          | K | G | 1,554.86 |
| 1023 | TMPO Isoform Beta of Lamina-associated polypeptide 2, isoforms beta/gamma                                                               | IPI00030131                                                             | 50,653.40 | 49 | 60 | NRPPLPAGTNSK          | R | G | 1,251.68 |
| 1024 | TMPO Lamina-associated polypeptide 2, isoform alpha                                                                                     | IPI00216230                                                             | 75,475.80 | 49 | 60 | NRPPLPAGTNSK          | R | G | 1,251.68 |
| 1025 | RPL23 60S ribosomal protein L23                                                                                                         | IPI00010153,IPI00795408                                                 | 14,847.90 | 49 | 66 | LNRLPAAGVGDMVMATVK    | R | K | 1,842.99 |
| 1026 | RPL23 60S ribosomal protein L23                                                                                                         | IPI00010153,IPI00795408                                                 | 14,847.90 | 49 | 66 | LNRLPAAGVGDMVMATVK    | R | K | 1,874.98 |
| 1027 | RAB7A Ras-related protein Rab-7a                                                                                                        | IPI00016342                                                             | 23,472.00 | 49 | 55 | EVMVDDR               | K | L | 879.3878 |
| 1028 | RAB1B Ras-related protein Rab-1B                                                                                                        | IPI00008964,IPI00896425                                                 | 22,154.00 | 49 | 58 | TIELDGKTIK            | R | L | 1,117.65 |
| 1029 | CHAC2 Cation transport regulator-like protein 2                                                                                         | IPI00103047                                                             | 20,857.10 | 49 | 66 | VVTLVEDPAGCVWGVAYR    | R | L | 1,991.01 |
| 1030 | LSM4 U6 snRNA-associated Sm-like protein LSM4                                                                                           | IPI00294955                                                             | 15,332.00 | 49 | 55 | DGDKFWR               | R | M | 923.4371 |
| 1031 | CHCHD3 Coiled-coil-helix-coiled-coil-helix domain-containing protein 3, mitochondrial                                                   | IPI00015833                                                             | 26,134.50 | 49 | 63 | YSGAYGASVSDEELK       | R | R | 1,575.72 |
| 1032 | PAK4 Isoform 1 of Serine/threonine-protein kinase PAK 4                                                                                 | IPI00014068                                                             | 64,054.80 | 49 | 68 | RPKPLVDPACITSIQPGAPK  | R | T | 2,145.19 |

|      |                                                                           |                                                             |           |    |    |                                 |   |   |          |
|------|---------------------------------------------------------------------------|-------------------------------------------------------------|-----------|----|----|---------------------------------|---|---|----------|
| 1033 | DCXR L-xylulose reductase                                                 | IPI00448095,IPI00797249                                     | 25,894.20 | 50 | 69 | ECPGIEPVCVDLGDWEATER            | R | A | 2,332.02 |
| 1034 | YRDC YrdC domain-containing protein, mitochondrial                        | IPI00384180                                                 | 29,310.30 | 50 | 63 | LPGGGAVQAASPER                  | R | A | 1,339.70 |
| 1035 | RBMX Heterogeneous nuclear ribonucleoprotein G                            | IPI00304692                                                 | 42,315.70 | 50 | 63 | GFAFVTFESPADAK                  | R | D | 1,486.72 |
| 1036 | RBMX Heterogeneous nuclear ribonucleoprotein G                            | IPI00304692                                                 | 42,315.70 | 50 | 63 | GFAFVTFESPADAK                  | R | D | 1,486.72 |
| 1037 | RBMX Heterogeneous nuclear ribonucleoprotein G                            | IPI00304692                                                 | 42,315.70 | 50 | 63 | GFAFVTFESPADAK                  | R | D | 1,486.72 |
| 1038 | RBMX Heterogeneous nuclear ribonucleoprotein G                            | IPI00304692                                                 | 42,315.70 | 50 | 63 | GFAFVTFESPADAK                  | R | D | 1,486.72 |
| 1039 | RBMX Heterogeneous nuclear ribonucleoprotein G                            | IPI00304692                                                 | 42,315.70 | 50 | 67 | GFAFVTFESPADAKDAAR              | R | D | 1,899.92 |
| 1040 | DDX47 Probable ATP-dependent RNA helicase DDX47                           | IPI00023972,IPI00397372                                     | 50,630.40 | 50 | 62 | IQIEAIPALQGR                    | K | D | 1,421.85 |
| 1041 | SNRNPB2 U2 small nuclear ribonucleoprotein B"                             | IPI00029267                                                 | 25,469.50 | 50 | 57 | GQAFVIFK                        | R | E | 909.5193 |
| 1042 | GCLM Glutamate--cysteine ligase regulatory subunit                        | IPI00010090                                                 | 30,709.30 | 50 | 64 | TLNEWSSQINPDLVR                 | K | E | 1,771.90 |
| 1043 | RPS17 40S ribosomal protein S17                                           | IPI00221093                                                 | 15,532.50 | 50 | 60 | IAGYVTHLMKR                     | K | I | 1,304.71 |
| 1044 | UNG Isoform 2 of Uracil-DNA glycosylase                                   | IPI00011069                                                 | 34,627.40 | 50 | 73 | KAPAGQEEPSTPPSSPLSAE QLDR       | K | I | 2,462.22 |
| 1045 | GSTK1 Glutathione S-transferase kappa 1                                   | IPI00219673,IPI00440703,IPI00917331,IPI00917714             | 25,480.10 | 50 | 61 | DSGNKPPGLLPR                    | K | K | 1,250.69 |
| 1046 | TAF12 Isoform TAFII20 of Transcription initiation factor TFIID subunit 12 | IPI00002806,IPI00759817                                     | 17,906.60 | 50 | 60 | LSPENNQVLTG                     | R | K | 1,242.67 |
| 1047 | HNRNPH1 Heterogeneous nuclear ribonucleoprotein H                         | IPI00013881,IPI00479191                                     | 49,211.80 | 50 | 68 | EGRPSGEAFVELESEDEVK             | R | L | 2,106.98 |
| 1048 | HNRNPH1 Heterogeneous nuclear ribonucleoprotein H                         | IPI00013881,IPI00479191                                     | 49,211.80 | 50 | 68 | EGRPSGEAFVELESEDEVK             | R | L | 2,106.98 |
| 1049 | RPLP2 60S acidic ribosomal protein P2                                     | IPI00008529                                                 | 11,647.40 | 50 | 61 | NIEDVIAQGIGK                    | K | L | 1,256.68 |
| 1050 | SNRNPB2 U2 small nuclear ribonucleoprotein B"                             | IPI00029267                                                 | 25,469.50 | 50 | 67 | GQAFVIFKELGSSTNALR              | R | Q | 1,938.04 |
| 1051 | RPS17 40S ribosomal protein S17                                           | IPI00221093                                                 | 15,532.50 | 50 | 59 | IAGYVTHLMK                      | K | R | 1,148.61 |
| 1052 | ATIC Bifunctional purine biosynthesis protein PURH                        | IPI00289499                                                 | 64,598.50 | 50 | 64 | DVSELTGFPEMLGGR                 | R | V | 1,623.77 |
| 1053 | ARHGDI A Rho GDP-dissociation inhibitor 1                                 | IPI00003815,IPI00793767,IPI00794402,IPI00796541             | 23,189.50 | 50 | 58 | KYKEALLGR                       | R | V | 1,077.64 |
| 1054 | PABPC1 Isoform 1 of Polyadenylate-binding protein 1                       | IPI00008524                                                 | 70,653.30 | 51 | 67 | SLGYAYVNFQQPADAER               | R | A | 1,928.91 |
| 1055 | PABPC4 Isoform 1 of Polyadenylate-binding protein 4                       | IPI00012726,IPI00555747,IPI00642904,IPI00642944             | 70,765.80 | 51 | 67 | SLGYAYVNFQQPADAER               | R | A | 1,928.91 |
| 1056 | RPS16 40S ribosomal protein S16                                           | IPI00221092                                                 | 16,427.90 | 51 | 60 | LLEPVLLLGK                      | K | E | 1,094.72 |
| 1057 | RPL26 60S ribosomal protein L26                                           | IPI00027270                                                 | 17,240.40 | 51 | 59 | KDDEVQVVR                       | R | G | 1,087.57 |
| 1058 | VPS29 Isoform 1 of Vacuolar protein sorting-associated protein 29         | IPI00170796,IPI00184284,IPI00798102                         | 20,488.10 | 51 | 60 | TLAGDVHIVR                      | K | G | 1,080.62 |
| 1059 | VPS29 Isoform 1 of Vacuolar protein sorting-associated protein 29         | IPI00170796,IPI00184284,IPI00798102                         | 20,488.10 | 51 | 60 | TLAGDVHIVR                      | K | G | 1,080.62 |
| 1060 | TRMT1 Isoform 1 of N(2),N(2)-dimethylguanosine tRNA methyltransferase     | IPI00020508,IPI00178861                                     | 72,215.30 | 51 | 63 | EVQETTIVTEGAAK                  | R | I | 1,362.67 |
| 1061 | CACYBP Isoform 1 of Calcyclin-binding protein                             | IPI00395627                                                 | 26,192.30 | 51 | 74 | KAELLDNEKPAAVVAPITGTYT VK       | K | I | 2,528.40 |
| 1062 | HSPA5 HSPA5 protein                                                       | IPI00003362                                                 | 72,405.60 | 51 | 61 | VEIANDQGNR                      | R | I | 1,228.63 |
| 1063 | BZW2 Basic leucine zipper and W2 domain-containing protein 2              | IPI00022305,IPI00894416                                     | 48,146.00 | 51 | 58 | FLDSTGSR                        | K | L | 882.4316 |
| 1064 | BUB3 Mitotic checkpoint protein BUB3                                      | IPI00013468,IPI00514701,IPI00644108                         | 37,136.70 | 51 | 80 | LKYQHTGAVLDCAFYDPTHA WSGGLDHQLK | R | M | 3,428.65 |
| 1065 | HNRNPC Isoform C1 of Heterogeneous nuclear ribonucleoproteins C1/C2       | IPI00216592,IPI00477313,IPI00909232                         | 32,320.00 | 51 | 61 | GFAFVQYVNER                     | K | N | 1,329.66 |
| 1066 | GOSR2 Isoform A of Golgi SNAP receptor complex member 2                   | IPI00023135,IPI00216965,IPI00788709,IPI00793112,IPI00795521 | 24,757.90 | 51 | 63 | LEILSSKEPPNKR                   | R | Q | 1,510.86 |
| 1067 | VIM Vimentin                                                              | IPI00418471                                                 | 53,634.60 | 51 | 64 | SLYASSPGGVYATR                  | R | S | 1,428.71 |
| 1068 | DNAJB12 DnaJ (Hsp40) homolog, subfamily B, member 12                      | IPI00014400                                                 | 45,472.60 | 52 | 60 | AIQSNQPDR                       | K | A | 1,028.51 |
| 1069 | STUB1 Isoform 1 of STIP1 homology and U box-containing protein 1          | IPI00025156                                                 | 34,839.00 | 52 | 66 | AITRNPLVAVYYTNR                 | R | A | 1,750.96 |
| 1070 | EIF4A3 Eukaryotic initiation factor 4A-III                                | IPI00009328                                                 | 46,854.40 | 52 | 67 | GIYAYGFKEKPSAIQQR               | R | A | 1,827.94 |
| 1071 | ARL15 ADP-ribosylation factor-like protein 15                             | IPI00005163                                                 | 22,859.10 | 52 | 69 | LCSESPDNVVSTTGFSIK              | K | A | 1,940.93 |

|      |                                                                              |                                                 |           |    |    |                         |   |   |          |
|------|------------------------------------------------------------------------------|-------------------------------------------------|-----------|----|----|-------------------------|---|---|----------|
| 1072 | GLO1 Lactoylglutathione lyase                                                | IPI00220766                                     | 20,760.80 | 52 | 60 | VLGMTLIQK               | R | C | 1,018.60 |
| 1073 | TOMM20 Mitochondrial import receptor subunit TOM20 homolog                   | IPI00016676                                     | 16,280.30 | 52 | 68 | AGLSKLPDLKDAAEVQK       | R | F | 1,783.00 |
| 1074 | PDZD11 Isoform 1 of PDZ domain-containing protein 11                         | IPI00550841,IPI00641523                         | 16,113.50 | 52 | 63 | KPPGAQLGFNIR            | K | G | 1,297.74 |
| 1075 | LMNB1 Lamin-B1                                                               | IPI00217975                                     | 66,391.60 | 52 | 71 | SLETENSALQLQVTEREEVR    | R | G | 2,331.18 |
| 1076 | CACYBP Isoform 1 of Calcyclin-binding protein                                | IPI00395627                                     | 26,192.30 | 52 | 74 | AELLDNEKPAAVVAPITTYTV   | K | I | 2,400.30 |
| 1077 | RPL31 60S ribosomal protein L31                                              | IPI00026302                                     | 14,445.20 | 52 | 63 | FAMKEMGTPDVR            | K | I | 1,413.65 |
| 1078 | AK2 Isoform 1 of Adenylate kinase isoenzyme 2, mitochondrial                 | IPI00215901                                     | 26,461.00 | 52 | 62 | AMVASGSELGK             | R | K | 1,065.52 |
| 1079 | RPL23 60S ribosomal protein L23                                              | IPI00010153,IPI00795408                         | 14,847.90 | 52 | 66 | LPAAGVGDMMVMTVK         | R | K | 1,491.75 |
| 1080 | AK2 Isoform 1 of Adenylate kinase isoenzyme 2, mitochondrial                 | IPI00215901                                     | 26,461.00 | 52 | 63 | AMVASGSELGKK            | R | L | 1,193.62 |
| 1081 | RPS26;LOC728937 40S ribosomal protein S26                                    | IPI00655650,IPI00902801                         | 12,997.50 | 52 | 66 | DISEASVFDAYVLPK         | R | L | 1,653.84 |
| 1082 | RAB1A Isoform 1 of Ras-related protein Rab-1A                                | IPI00005719,IPI00873902                         | 22,660.40 | 52 | 61 | TIELDGKTIK              | R | L | 1,117.65 |
| 1083 | KPNA2;LOC728860 Importin subunit alpha-2                                     | IPI00002214,IPI00789457                         | 57,844.50 | 52 | 68 | NVSSFPDDATSPLQENR       | R | N | 1,876.87 |
| 1084 | PAPSS1 Bifunctional 3'-phosphoadenosine 5'-phosphosulfate synthetase 1       | IPI00011619                                     | 70,815.20 | 52 | 65 | GCTVWLTGLSGAGK          | R | T | 1,406.71 |
| 1085 | MBD3 Isoform 1 of Methyl-CpG-binding domain protein 3                        | IPI00439194,IPI00439195                         | 32,826.30 | 52 | 65 | YLGGSMDLSTFDFR          | R | T | 1,624.73 |
| 1086 | TIMM23 Mitochondrial import inner membrane translocase subunit Tim23         | IPI00007309                                     | 21,926.20 | 52 | 68 | YLVQDTDEFILPTGANK       | R | T | 1,923.97 |
| 1087 | PPIB Peptidyl-prolyl cis-trans isomerase B                                   | IPI00646304                                     | 23,725.20 | 52 | 59 | IGDEDVGR                | R | V | 860.411  |
| 1088 | MDH2 Malate dehydrogenase, mitochondrial                                     | IPI00291006                                     | 35,485.70 | 53 | 74 | LTLYDIAHTPGVAADLSHIETK  | R | A | 2,365.24 |
| 1089 | UBE2L3 Ubiquitin-conjugating enzyme E2 L3                                    | IPI00021347                                     | 17,844.30 | 53 | 67 | IEINFPAEYFPKPPK         | R | I | 1,789.95 |
| 1090 | PCNP Isoform 1 of PEST proteolytic signal-containing nuclear protein         | IPI00291608,IPI00796456                         | 18,907.40 | 53 | 67 | SAEEEEADLPTKPTK         | R | I | 1,586.79 |
| 1091 | TROVE2 Isoform Long of 60 kDa SS-A/Ro ribonucleoprotein                      | IPI00019450,IPI00642416,IPI00646322,IPI00646813 | 60,654.10 | 53 | 63 | LGLENAEALIR             | K | L | 1,198.68 |
| 1092 | HNRNPF Heterogeneous nuclear ribonucleoprotein F                             | IPI00003881                                     | 45,653.80 | 53 | 68 | QSGEAFVELGSEDDVK        | R | M | 1,709.79 |
| 1093 | BUB3 Mitotic checkpoint protein BUB3                                         | IPI00013468,IPI00514701,IPI00644108             | 37,136.70 | 53 | 80 | YQHTGAVLDCAFYDPTHAWS    | K | M | 3,187.47 |
| 1094 | HNRNPK Isoform 1 of Heterogeneous nuclear ribonucleoprotein K                | IPI00216049,IPI00216746,IPI00807545,IPI00910458 | 50,960.50 | 53 | 63 | GGLDHQLK<br>NAGAVIGKGGK | K | N | 971.5634 |
| 1095 | TMCO1 Isoform 1 of Transmembrane and coiled-coil domain-containing protein 1 | IPI00026111,IPI00761107                         | 21,158.30 | 53 | 63 | KKETITESAGR             | K | Q | 1,219.66 |
| 1096 | SERBP1 Isoform 1 of Plasminogen activator inhibitor 1 RNA-binding protein    | IPI00410693,IPI00412714,IPI00470497,IPI00470498 | 44,947.80 | 53 | 68 | SAAQAAAQTNNSAAGK        | K | Q | 1,460.71 |
| 1097 | SERBP1 Isoform 1 of Plasminogen activator inhibitor 1 RNA-binding protein    | IPI00410693,IPI00412714,IPI00470497,IPI00470498 | 44,947.80 | 53 | 68 | SAAQAAAQTNNSAAGK        | K | Q | 1,460.71 |
| 1098 | EBP 3-beta-hydroxysteroid-Delta(8),Delta(7)-isomerase                        | IPI00008599                                     | 26,335.10 | 53 | 62 | AAVPLGTWR               | R | R | 1,069.62 |
| 1099 | IGF2BP1 Insulin-like growth factor 2 mRNA-binding protein 1                  | IPI00008557                                     | 63,438.30 | 53 | 66 | AIETFSGKVELQGK          | K | R | 1,506.82 |
| 1100 | NDNL2 Melanoma-associated antigen G1                                         | IPI00217104                                     | 34,291.10 | 53 | 69 | GPGGSQGSQGPSPQGAR       | R | R | 1,524.72 |
| 1101 | STMN1 Stathmin                                                               | IPI00479997                                     | 17,285.00 | 53 | 60 | KLEAAEER                | K | R | 945.5    |
| 1102 | RPL22 60S ribosomal protein L22                                              | IPI00219153,IPI00878392                         | 14,769.30 | 53 | 65 | AGNLGGGVVTIER           | K | S | 1,242.68 |
| 1103 | HSP90AB1 Heat shock protein HSP 90-beta                                      | IPI00414676                                     | 83,249.30 | 54 | 69 | IRYESLTDPSKLDGSK        | K | E | 1,808.94 |
| 1104 | NIP7 Isoform 1 of 60S ribosome subunit biogenesis protein NIP7 homolog       | IPI00007175,IPI00020793                         | 20,444.90 | 54 | 72 | LAANISGDKLVSLGTCFGK     | K | F | 1,951.03 |
| 1105 | PDCD10 Programmed cell death protein 10                                      | IPI00298558                                     | 24,684.50 | 54 | 65 | ENPGLTQDIIMK            | K | I | 1,374.69 |
| 1106 | PSMA5 Proteasome subunit alpha type-5                                        | IPI00291922                                     | 26,393.30 | 54 | 66 | ITSPLMEPSSIEK           | R | I | 1,431.74 |
| 1107 | PSMA5 Proteasome subunit alpha type-5                                        | IPI00291922                                     | 26,393.30 | 54 | 66 | ITSPLMEPSSIEK           | R | I | 1,447.74 |
| 1108 | CNN3 Calponin-3                                                              | IPI00216682,IPI00873410,IPI00909623             | 36,396.60 | 54 | 64 | DGIILCELINK             | K | L | 1,287.70 |
| 1109 | CCT7 T-complex protein 1 subunit eta                                         | IPI00018465                                     | 59,349.80 | 54 | 67 | GKATISNDGATILK          | R | L | 1,388.77 |
| 1110 | GABPA GA-binding protein alpha chain                                         | IPI00299413                                     | 51,277.40 | 54 | 58 | LLEPR                   | K | L | 627.3825 |

|      |                                                                              |                                                                                                                                                                                                                                                                         |           |    |    |                                        |   |   |          |
|------|------------------------------------------------------------------------------|-------------------------------------------------------------------------------------------------------------------------------------------------------------------------------------------------------------------------------------------------------------------------|-----------|----|----|----------------------------------------|---|---|----------|
| 1111 | TRAPPC5 Trafficking protein particle complex subunit 5                       | IP100177509                                                                                                                                                                                                                                                             | 20,765.40 | 54 | 59 | LAALGR                                 | R | Q | 600.3828 |
| 1112 | DUSP3 Dual specificity protein phosphatase 3                                 | IP100018671,IP100790757                                                                                                                                                                                                                                                 | 20,460.80 | 54 | 66 | LGITHVLNAAEGR                          | K | S | 1,350.75 |
| 1113 | RNH1 Ribonuclease inhibitor                                                  | IP100550069                                                                                                                                                                                                                                                             | 49,956.40 | 54 | 64 | VNPALAE LNLR                           | R | S | 1,209.70 |
| 1114 | CCDC86 Coiled-coil domain-containing protein 86                              | IP100012199                                                                                                                                                                                                                                                             | 40,218.10 | 54 | 64 | AGLGSPPERPPK                           | R | T | 1,108.61 |
| 1115 | NUDC Nuclear migration protein nudC                                          | IP100550746                                                                                                                                                                                                                                                             | 38,225.70 | 54 | 68 | LITQTFSHHNQLAQK                        | K | T | 1,765.93 |
| 1116 | UBE2N Ubiquitin-conjugating enzyme E2 N                                      | IP100003949                                                                                                                                                                                                                                                             | 17,120.60 | 54 | 68 | LELFLPEEYPM A A P K                    | K | V | 1,763.89 |
| 1117 | HNRNPA1 Isoform A1-B of Heterogeneous nuclear ribonucleoprotein A1           | IP100215965,IP100465365                                                                                                                                                                                                                                                 | 38,828.10 | 54 | 78 | SRGFGFV TYATV E E V D A A M N<br>ARPHK | R | V | 2,769.34 |
| 1118 | PSMB6 Proteasome subunit beta type-6                                         | IP100000811,IP100789119                                                                                                                                                                                                                                                 | 25,339.90 | 54 | 63 | TTTGSYIANR                             | R | V | 1,083.54 |
| 1119 | HIST1H1C Histone H1.2                                                        | IP100217465                                                                                                                                                                                                                                                             | 21,347.80 | 55 | 64 | SGVSLAALKK                             | R | A | 973.6041 |
| 1120 | HIST1H1C Histone H1.2                                                        | IP100217465                                                                                                                                                                                                                                                             | 21,347.80 | 55 | 64 | SGVSLAALKK                             | R | A | 973.6041 |
| 1121 | HIST1H1C Histone H1.2                                                        | IP100217465                                                                                                                                                                                                                                                             | 21,347.80 | 55 | 64 | SGVSLAALKK                             | R | A | 973.6041 |
| 1122 | SMAD5 Mothers against decapentaplegic homolog 5                              | IP100017730,IP100903182                                                                                                                                                                                                                                                 | 52,239.90 | 55 | 64 | ALSSPGQPSK                             | K | C | 971.5157 |
| 1123 | UBB;RPS27A;UBC ubiquitin and ribosomal protein S27a precursor                | IP100179330,IP100456429,IP100719280,IP100743241,IP100743650,IP100744274,IP100784990,IP100789107,IP100789823,IP100790633,IP100792712,IP100793330,IP100793729,IP100793810,IP100794211,IP100794925,IP100795527,IP100796007,IP100796600,IP100797400,IP100798127,IP100798155 | 17,947.60 | 55 | 63 | TLSDYNIQK                              | R | E | 1,081.55 |
| 1124 | SNRPD3 Small nuclear ribonucleoprotein Sm D3                                 | IP100017964,IP100878876,IP100879750                                                                                                                                                                                                                                     | 13,898.60 | 55 | 64 | VAQLEQVYIR                             | R | G | 1,218.68 |
| 1125 | PHB2 Prohibitin-2                                                            | IP100027252                                                                                                                                                                                                                                                             | 33,279.60 | 55 | 71 | IGGVQQDTILAEGLHFR                      | R | I | 1,853.99 |
| 1126 | RAD21 Double-strand-break repair protein rad21 homolog                       | IP100006715                                                                                                                                                                                                                                                             | 71,673.60 | 55 | 65 | TSGHLLLG V V R                         | R | I | 1,151.69 |
| 1127 | VPS28 Vacuolar protein sorting-associated protein 28 homolog                 | IP100007155,IP100328913,IP100795056,IP100796001                                                                                                                                                                                                                         | 25,408.00 | 55 | 72 | AYIKDCVSPSEYTAACSR                     | K | L | 2,077.93 |
| 1128 | UBB;RPS27A;UBC ubiquitin and ribosomal protein S27a precursor                | IP100179330,IP100456429,IP100719280,IP100743241,IP100743650,IP100744274,IP100784990,IP100789107,IP100789823,IP100790633,IP100792712,IP100793330,IP100793729,IP100793810,IP100794211,IP100794925,IP100795527,IP100796007,IP100796600,IP100797400,IP100798127,IP100798155 | 17,947.60 | 55 | 72 | TLSDYNIQKESTLHLVLR                     | R | L | 2,130.16 |
| 1129 | UBB;RPS27A;UBC ubiquitin and ribosomal protein S27a precursor                | IP100179330,IP100456429,IP100719280,IP100743241,IP100743650,IP100744274,IP100784990,IP100789107,IP100789823,IP100790633,IP100792712,IP100793330,IP100793729,IP100793810,IP100794211,IP100794925,IP100795527,IP100796007,IP100796600,IP100797400,IP100798127,IP100798155 | 17,947.60 | 55 | 72 | TLSDYNIQKESTLHLVLR                     | R | L | 2,130.16 |
| 1130 | EXOSC9 Isoform 2 of Exosome complex exonuclease RRP45                        | IP100029697,IP100654592                                                                                                                                                                                                                                                 | 50,786.00 | 55 | 67 | VLGQVSC ELVSPK                         | R | L | 1,415.76 |
| 1131 | CHMP1A Isoform 1 of Charged multivesicular body protein 1a                   | IP100382452                                                                                                                                                                                                                                                             | 21,684.50 | 55 | 64 | KKNEGVN W L R                          | R | M | 1,243.69 |
| 1132 | TMCO1 Isoform 1 of Transmembrane and coiled-coil domain-containing protein 1 | IP100026111,IP100761107                                                                                                                                                                                                                                                 | 21,158.30 | 55 | 63 | ETITESAGR                              | K | Q | 963.4742 |
| 1133 | TCEA1 Isoform 1 of Transcription elongation factor A protein 1               | IP100333215                                                                                                                                                                                                                                                             | 33,952.60 | 55 | 67 | KQSTDEE V T S L A K                    | R | S | 1,435.73 |
| 1134 | TRAPPC3 Trafficking protein particle complex subunit 3                       | IP100004324,IP100640089                                                                                                                                                                                                                                                 | 20,256.70 | 55 | 62 | LIEDFLAR                               | R | S | 976.5463 |
| 1135 | RPS18;LOC100130553 40S ribosomal protein S18                                 | IP100013296                                                                                                                                                                                                                                                             | 17,701.30 | 55 | 66 | RAGELTEDEVER                           | K | V | 1,403.68 |
| 1136 | STUB1 Isoform 1 of STIP1 homology and U box-containing protein 1             | IP100025156                                                                                                                                                                                                                                                             | 34,839.00 | 56 | 66 | NPLVAVYYTNR                            | R | A | 1,309.69 |
| 1137 | TCEB2 Transcription elongation factor B polypeptide 2                        | IP100026670,IP100410162,IP100917694                                                                                                                                                                                                                                     | 13,115.20 | 56 | 80 | TLGECGFTSQTARQPATV<br>GLAFR            | K | A | 2,636.33 |
| 1138 | HNRNPH3 Isoform 1 of Heterogeneous nuclear ribonucleoprotein H3              | IP100013877,IP100216492                                                                                                                                                                                                                                                 | 36,909.60 | 56 | 67 | STGEAFVQFASK                           | R | E | 1,271.63 |
| 1139 | RPS13 40S ribosomal protein S13                                              | IP100221089                                                                                                                                                                                                                                                             | 17,205.30 | 56 | 64 | DSHGVAQVR                              | R | F | 968.4908 |
| 1140 | RAB7A Ras-related protein Rab-7a                                             | IP100016342                                                                                                                                                                                                                                                             | 23,472.00 | 56 | 69 | LVTMQIWDTAGQER                         | R | F | 1,647.82 |
| 1141 | GDI1 Rab GDP dissociation inhibitor alpha                                    | IP100010154,IP100910113                                                                                                                                                                                                                                                 | 50,566.10 | 56 | 68 | FQLLEGPPESMGR                          | R | G | 1,476.72 |
| 1142 | AK1 Adenylate kinase isoenzyme 1                                             | IP100018342,IP100640817                                                                                                                                                                                                                                                 | 21,617.10 | 56 | 63 | KLSEIMEK                               | K | G | 993.5287 |
| 1143 | LSM4 U6 snRNA-associated Sm-like protein LSM4                                | IP100294955                                                                                                                                                                                                                                                             | 15,332.00 | 56 | 62 | MPECYIR                                | R | G | 984.4278 |
| 1144 | GSTP1 Glutathione S-transferase P                                            | IP100219757                                                                                                                                                                                                                                                             | 23,338.70 | 56 | 71 | FQDGLTLYQSNTILR                        | K | H | 1,883.95 |
| 1145 | PPIA Peptidyl-prolyl cis-trans isomerase A                                   | IP100419585,IP100887678                                                                                                                                                                                                                                                 | 17,994.90 | 56 | 69 | IIPGFMCQGGDFTR                         | R | H | 1,598.75 |
| 1146 | PPIA Peptidyl-prolyl cis-trans isomerase A                                   | IP100419585,IP100887678                                                                                                                                                                                                                                                 | 17,994.90 | 56 | 69 | IIPGFMCQGGDFTR                         | R | H | 1,598.75 |
| 1147 | PSMD12 26S proteasome non-ATPase regulatory subunit 12                       | IP100185374                                                                                                                                                                                                                                                             | 52,888.20 | 56 | 65 | TASDMVSTSR                             | R | I | 1,070.48 |

|      |                                                                    |                                                 |            |    |    |                               |   |   |          |
|------|--------------------------------------------------------------------|-------------------------------------------------|------------|----|----|-------------------------------|---|---|----------|
| 1148 | EIF5A Isoform 1 of Eukaryotic translation initiation factor 5A-1   | IPI00411704,IPI00855924                         | 16,814.70  | 56 | 67 | VHLVGIDIFTGK                  | K | K | 1,298.75 |
| 1149 | PPCS Phosphopantothenate--cysteine ligase                          | IPI00023987                                     | 33,988.00  | 56 | 64 | FLDNFSSGR                     | R | R | 1,042.50 |
| 1150 | SNRPA1 U2 small nuclear ribonucleoprotein A'                       | IPI00297477                                     | 28,399.10  | 56 | 64 | KLDGFPLLR                     | R | R | 1,058.64 |
| 1151 | C21orf70 Isoform A of Uncharacterized protein C21orf70             | IPI00027898,IPI00217294                         | 25,438.70  | 56 | 72 | TKIDPSALVQKLELDVR             | R | S | 1,925.11 |
| 1152 | GNPNAT1 Glucosamine 6-phosphate N-acetyltransferase                | IPI00061525                                     | 20,731.30  | 56 | 73 | VLGQLTETGVVSPEQFMK            | K | S | 1,963.02 |
| 1153 | NUDT5 ADP-sugar pyrophosphatase                                    | IPI00296913,IPI00646762                         | 24,309.80  | 56 | 70 | EQTADGVAVIPVLQR               | K | T | 1,595.88 |
| 1154 | RPS18;LOC100130553 40S ribosomal protein S18                       | IPI00013296                                     | 17,701.30  | 56 | 66 | AGELTEDEVER                   | R | V | 1,247.58 |
| 1155 | HNRNPA1 Isoform A1-B of Heterogeneous nuclear ribonucleoprotein A1 | IPI00215965,IPI00465365                         | 38,828.10  | 56 | 78 | GFGFVYATVEEVDAAMNAR           | R | V | 2,526.21 |
| 1156 | HNRNPA1 Isoform A1-B of Heterogeneous nuclear ribonucleoprotein A1 | IPI00215965,IPI00465365                         | 38,828.10  | 56 | 78 | GFGFVYATVEEVDAAMNAR<br>PHK    | R | V | 2,510.21 |
| 1157 | TPI1 Isoform 1 of Triosephosphate isomerase                        | IPI00465028                                     | 30,772.80  | 56 | 70 | KQSLGELIGTLNAAK               | R | V | 1,542.89 |
| 1158 | NAP1L1 Nucleosome assembly protein 1-like 1                        | IPI00023860,IPI00789029,IPI00796965             | 45,357.00  | 56 | 72 | LDGLVETPTGYIESLPR             | R | V | 1,859.98 |
| 1159 | NAP1L1 Nucleosome assembly protein 1-like 1                        | IPI00023860,IPI00789029,IPI00796965             | 45,357.00  | 56 | 72 | LDGLVETPTGYIESLPR             | R | V | 1,859.98 |
| 1160 | TIPRL Isoform 1 of TIP41-like protein                              | IPI00745568                                     | 31,426.80  | 57 | 74 | IQHSGSGFIEFNATDALR            | R | C | 1,932.96 |
| 1161 | PSMB1 Proteasome subunit beta type-1                               | IPI00025019                                     | 26,472.50  | 57 | 66 | LSEGSIIHR                     | R | D | 1,146.59 |
| 1162 | RPS8 40S ribosomal protein S8                                      | IPI00216587,IPI00872430                         | 24,188.40  | 57 | 74 | ALRLDVGNFSWGSECCTR            | R | K | 2,127.97 |
| 1163 | METTL7A Methyltransferase-like protein 7A                          | IPI00022300                                     | 28,301.60  | 57 | 71 | ELFSNLQEFAGPSGK               | R | L | 1,623.80 |
| 1164 | HSPA1A;HSPA1B Heat shock 70 kDa protein 1                          | IPI00304925                                     | 70,036.00  | 57 | 72 | NQVALNPQNTVFDAGR              | K | L | 1,814.95 |
| 1165 | - cDNA FLJ54408, highly similar to Heat shock 70 kDa protein 1     | IPI00911039                                     | 63,907.90  | 57 | 72 | NQVALNPQNTVFDAGR              | K | L | 1,814.95 |
| 1166 | COP55 COP9 signalosome complex subunit 5                           | IPI00009958,IPI00556139                         | 37,561.90  | 57 | 64 | ISALALLK                      | K | M | 828.5554 |
| 1167 | FYTTD1 Forty-two-three domain-containing protein 1                 | IPI00289907                                     | 35,782.20  | 57 | 67 | LLQQSGAQQFR                   | R | M | 1,275.68 |
| 1168 | PRDX6 Peroxiredoxin-6                                              | IPI00220301                                     | 25,018.10  | 57 | 64 | LAPEFAKR                      | K | N | 931.536  |
| 1169 | DDX5 Probable ATP-dependent RNA helicase DDX5                      | IPI00017617                                     | 69,131.70  | 57 | 67 | NFYQEHPDLAR                   | K | R | 1,389.65 |
| 1170 | HSPA1A;HSPA1B Heat shock 70 kDa protein 1                          | IPI00304925                                     | 70,036.00  | 57 | 71 | NQVALNPQNTVFDAG               | K | R | 1,658.85 |
| 1171 | HSPA1A;HSPA1B Heat shock 70 kDa protein 1                          | IPI00304925                                     | 70,036.00  | 57 | 71 | NQVALNPQNTVFDAG               | K | R | 1,658.85 |
| 1172 | HSPA1A;HSPA1B Heat shock 70 kDa protein 1                          | IPI00304925                                     | 70,036.00  | 57 | 71 | NQVALNPQNTVFDAG               | K | R | 1,658.85 |
| 1173 | HSPA1A;HSPA1B Heat shock 70 kDa protein 1                          | IPI00304925                                     | 70,036.00  | 57 | 71 | NQVALNPQNTVFDAG               | K | R | 1,658.85 |
| 1174 | - cDNA FLJ54408, highly similar to Heat shock 70 kDa protein 1     | IPI00911039                                     | 63,907.90  | 57 | 71 | NQVALNPQNTVFDAG               | K | R | 1,658.85 |
| 1175 | HSPA8 Isoform 1 of Heat shock cognate 71 kDa protein               | IPI00003865                                     | 70,881.80  | 57 | 71 | NQVAMNPTNTVFDAG               | K | R | 1,665.79 |
| 1176 | RAB2B Ras-related protein Rab-2B                                   | IPI00102896                                     | 24,197.10  | 57 | 69 | LQIWDTAGQESFR                 | K | S | 1,550.76 |
| 1177 | RPL18A 60S ribosomal protein L18a                                  | IPI00026202                                     | 20,744.60  | 57 | 70 | SSGEIVYCGQVFEK                | K | S | 1,602.75 |
| 1178 | PKM2 Isoform M1 of Pyruvate kinase isozymes M1/M2                  | IPI00220644,IPI00479186                         | 58,044.60  | 57 | 66 | SVETLKEMIK                    | R | S | 1,177.65 |
| 1179 | HOXD13 homeobox D13                                                | IPI00793525,IPI00871270                         | 36,083.20  | 57 | 82 | AAAAAAAAAAAAAASGFAYP<br>GTSER | R | T | 2,237.09 |
| 1180 | EIF3CL;EIF3C Eukaryotic translation initiation factor 3 subunit C  | IPI00016910,IPI00646839,IPI00873286,IPI00910003 | 105,329.20 | 57 | 65 | FEELTNLIR                     | R | T | 1,134.62 |
| 1181 | RPL30 60S ribosomal protein L30                                    | IPI00219156,IPI00872940                         | 12,766.70  | 57 | 68 | KSEIEYAMLAK                   | R | T | 1,445.73 |
| 1182 | TPI1 Isoform 1 of Triosephosphate isomerase                        | IPI00465028                                     | 30,772.80  | 57 | 70 | QSLGELIGTLNAAK                | K | V | 1,414.79 |
| 1183 | NME2 Nucleoside diphosphate kinase B                               | IPI00026260                                     | 17,280.20  | 57 | 66 | DRPFFPGLVK                    | K | Y | 1,175.66 |
| 1184 | HNRNPM Isoform 1 of Heterogeneous nuclear ribonucleoprotein M      | IPI00171903,IPI00383296                         | 77,499.30  | 57 | 70 | GGNRFEPYANPTKR                | R | Y | 1,606.81 |
| 1185 | HMGB1 High mobility group protein B1                               | IPI00419258                                     | 24,876.70  | 58 | 65 | GKFEDMAK                      | K | A | 941.4399 |
| 1186 | PCBP2 poly(rC) binding protein 2 isoform b                         | IPI00012066,IPI00790627                         | 38,204.50  | 58 | 70 | IITLAGPTNAIFK                 | R | A | 1,358.80 |
| 1187 | PCBP2 poly(rC) binding protein 2 isoform b                         | IPI00012066,IPI00790627                         | 38,204.50  | 58 | 70 | IITLAGPTNAIFK                 | R | A | 1,358.80 |
| 1188 | PCBP2 poly(rC) binding protein 2 isoform b                         | IPI00012066,IPI00790627                         | 38,204.50  | 58 | 70 | IITLAGPTNAIFK                 | R | A | 1,358.80 |
| 1189 | PCBP1 Poly(rC)-binding protein 1                                   | IPI00016610                                     | 37,480.20  | 58 | 70 | IITLTGPTNAIFK                 | R | A | 1,388.82 |
| 1190 | PCBP1 Poly(rC)-binding protein 1                                   | IPI00016610                                     | 37,480.20  | 58 | 70 | IITLTGPTNAIFK                 | R | A | 1,388.82 |

|      |                                                                         |                                                 |            |    |    |                                   |   |   |          |
|------|-------------------------------------------------------------------------|-------------------------------------------------|------------|----|----|-----------------------------------|---|---|----------|
| 1191 | PCBP1 Poly(rC)-binding protein 1                                        | IPI00016610                                     | 37,480.20  | 58 | 70 | IITLTGPTNAIFK                     | R | A | 1,388.82 |
| 1192 | PCBP1 Poly(rC)-binding protein 1                                        | IPI00016610                                     | 37,480.20  | 58 | 70 | IITLTGPTNAIFK                     | R | A | 1,388.82 |
| 1193 | PSMC5 26S protease regulatory subunit 8                                 | IPI00023919,IPI00745502                         | 45,609.10  | 58 | 78 | LLREELQLLQEQGSYVGEVV<br>R         | R | A | 2,458.33 |
| 1194 | SFRS3 Splicing factor, arginine/serine-rich 3                           | IPI00010204,IPI00843996                         | 19,312.00  | 58 | 64 | DAADAVR                           | R | E | 717.3526 |
| 1195 | BTF3 Isoform 1 of Transcription factor BTF3                             | IPI00221035                                     | 22,150.30  | 58 | 63 | LQAQVR                            | K | I | 714.4257 |
| 1196 | HIST2H3A;HIST2H3D;HIST2H3C Histone H3.2                                 | IPI00171611,IPI00219038,IPI00465070,IPI00909530 | 15,370.70  | 58 | 64 | STELLIR                           | K | K | 831.4935 |
| 1197 | HIST2H3A;HIST2H3D;HIST2H3C Histone H3.2                                 | IPI00171611,IPI00219038,IPI00465070,IPI00909530 | 15,370.70  | 58 | 64 | STELLIR                           | K | K | 831.4935 |
| 1198 | GPSN2 Isoform 1 of Synaptic glycoprotein SC2                            | IPI00100656,IPI00644037                         | 36,018.00  | 58 | 67 | SLKDEDVLQK                        | K | L | 1,174.63 |
| 1199 | HIST2H3A;HIST2H3D;HIST2H3C Histone H3.2                                 | IPI00171611,IPI00219038,IPI00465070,IPI00909530 | 15,370.70  | 58 | 65 | STELLIRK                          | K | L | 959.5885 |
| 1200 | CCT2 T-complex protein 1 subunit beta                                   | IPI00297779                                     | 57,471.90  | 58 | 72 | DASLMVTNDGATILK                   | R | N | 1,564.79 |
| 1201 | SNRNPB2 U2 small nuclear ribonucleoprotein B"                           | IPI00029267                                     | 25,469.50  | 58 | 67 | ELGSVTNALR                        | K | Q | 1,047.54 |
| 1202 | RPS7 40S ribosomal protein S7                                           | IPI00013415                                     | 22,109.50  | 58 | 70 | KAIIFVVPVQLK                      | R | S | 1,465.95 |
| 1203 | HMGB2 High mobility group protein B2                                    | IPI00219097                                     | 24,016.60  | 58 | 65 | SKFEDMAK                          | K | S | 971.4504 |
| 1204 | MTHFD1 C-1-tetrahydrofolate synthase,<br>cytoplasmic                    | IPI00218342,IPI00794900                         | 101,543.50 | 59 | 66 | AAEEIGIK                          | K | A | 830.4619 |
| 1205 | CBR1 Carbonyl reductase [NADPH] 1                                       | IPI00295386                                     | 30,356.80  | 59 | 71 | FHQLDIDDLQSIR                     | R | A | 1,599.81 |
| 1206 | CMPK1 cytidine monophosphate (UMP-CMP)<br>kinase 1, cytosolic isoform a | IPI00219953                                     | 25,837.80  | 59 | 71 | YGTHLSAGELLR                      | K | D | 1,479.76 |
| 1207 | RAB18 Ras-related protein Rab-18                                        | IPI00014577                                     | 22,959.50  | 59 | 69 | LAIWDTAGQER                       | K | F | 1,259.64 |
| 1208 | RAB1B Ras-related protein Rab-1B                                        | IPI00008964,IPI00896425                         | 22,154.00  | 59 | 69 | LQIWDTAGQER                       | K | F | 1,316.66 |
| 1209 | RAB8A Ras-related protein Rab-8A                                        | IPI00028481                                     | 23,651.60  | 59 | 69 | LQIWDTAGQER                       | K | F | 1,316.66 |
| 1210 | RAB35 Ras-related protein Rab-35                                        | IPI00300096                                     | 23,007.20  | 59 | 69 | LQIWDTAGQER                       | K | F | 1,316.66 |
| 1211 | HIST3H2BB Histone H2B type 3-B                                          | IPI00166293                                     | 13,890.60  | 59 | 73 | AMGIMNSFVNDIFER                   | K | I | 1,759.81 |
| 1212 | H2BFS Histone H2B type F-S                                              | IPI00477495,IPI00816252                         | 13,926.60  | 59 | 73 | AMGIMNSFVNDIFER                   | K | I | 1,759.81 |
| 1213 | H2BFS Histone H2B type F-S                                              | IPI00477495,IPI00816252                         | 13,926.60  | 59 | 73 | AMGIMNSFVNDIFER                   | K | I | 1,775.81 |
| 1214 | H2BFS Histone H2B type F-S                                              | IPI00477495,IPI00816252                         | 13,926.60  | 59 | 73 | AMGIMNSFVNDIFER                   | K | I | 1,775.81 |
| 1215 | H2BFS Histone H2B type F-S                                              | IPI00477495,IPI00816252                         | 13,926.60  | 59 | 73 | AMGIMNSFVNDIFER                   | K | I | 1,775.81 |
| 1216 | H2BFS Histone H2B type F-S                                              | IPI00477495,IPI00816252                         | 13,926.60  | 59 | 73 | AMGIMNSFVNDIFER                   | K | I | 1,775.81 |
| 1217 | H2BFS Histone H2B type F-S                                              | IPI00477495,IPI00816252                         | 13,926.60  | 59 | 73 | AMGIMNSFVNDIFER                   | K | I | 1,775.81 |
| 1218 | H2BFS Histone H2B type F-S                                              | IPI00477495,IPI00816252                         | 13,926.60  | 59 | 73 | AMGIMNSFVNDIFER                   | K | I | 1,775.81 |
| 1219 | HIST1H2BJ Histone H2B type 1-J                                          | IPI00515061                                     | 13,886.70  | 59 | 73 | AMGIMNSFVNDIFER                   | K | I | 1,759.81 |
| 1220 | FAM32A Protein FAM32A                                                   | IPI00022402                                     | 13,160.80  | 59 | 67 | TPAQAAFEK                         | R | M | 962.4942 |
| 1221 | GSPT1 G1 to S phase transition 1 isoform 2                              | IPI00909083,IPI00910513                         | 68,555.00  | 59 | 67 | ENLSAAFSR                         | R | Q | 994.4951 |
| 1222 | RPS7 40S ribosomal protein S7                                           | IPI00013415                                     | 22,109.50  | 59 | 70 | AIIIFVVPVQLK                      | K | S | 1,337.86 |
| 1223 | SNCA Isoform 1 of Alpha-synuclein                                       | IPI00024107,IPI00218467                         | 14,441.30  | 59 | 80 | TKEQVTNVGGAVVTGVTAVA<br>QK        | K | T | 2,157.19 |
| 1224 | ATP5A1 ATP synthase subunit alpha, mitochondrial                        | IPI00440493                                     | 59,734.10  | 59 | 73 | ILGADTSVDLEETGR                   | R | V | 1,575.79 |
| 1225 | HMGN2 Non-histone chromosomal protein HMG-17                            | IPI00217950                                     | 9,375.10   | 60 | 82 | ADAGKEGNNPAENGDAKTDQ<br>AQK       | K | A | 2,329.07 |
| 1226 | RAB10 Ras-related protein Rab-10                                        | IPI00016513                                     | 22,524.10  | 60 | 70 | LQIWDTAGQER                       | K | F | 1,316.66 |
| 1227 | PSMA6 Proteasome subunit alpha type-6                                   | IPI00029623                                     | 27,381.50  | 60 | 71 | LLDSSTVTHLFK                      | K | I | 1,360.75 |
| 1228 | ARF1 ADP-ribosylation factor 1                                          | IPI00215914,IPI00215917                         | 20,679.60  | 60 | 73 | NISFTVWDVGGQDK                    | K | I | 1,565.76 |
| 1229 | ILF2 Interleukin enhancer-binding factor 2                              | IPI00005198,IPI00872107                         | 43,044.70  | 60 | 80 | RNQDLAPNSAEQASILSLVTK             | K | I | 2,255.20 |
| 1230 | METTL11A Chromosome 9 open reading frame 32                             | IPI00515040,IPI00549389                         | 15,878.80  | 60 | 74 | TGTSCALDCGAGIGR                   | K | I | 1,495.66 |
| 1231 | CUGBP1 Isoform 1 of CUG-BP- and ETR-3-like<br>factor 1                  | IPI00034015,IPI00218388,IPI00218389,IPI00853009 | 52,046.00  | 60 | 69 | GCCFVTFYTR                        | K | K | 1,310.57 |
| 1232 | RPS8 40S ribosomal protein S8                                           | IPI00216587,IPI00872430                         | 24,188.40  | 60 | 74 | LDVGNFSWGSECCTR                   | R | K | 1,787.75 |
| 1233 | RCC1 regulator of chromosome condensation 1<br>isoform a                | IPI00001661,IPI00747309,IPI00787306             | 48,126.30  | 60 | 88 | SHSTEPGLVLTGQGQDVGQL<br>GLGENVMER | R | K | 3,009.50 |
| 1234 | SUB1 Activated RNA polymerase II transcriptional<br>coactivator p15     | IPI00221222                                     | 14,377.90  | 60 | 68 | DDNMFQIGK                         | R | M | 1,083.48 |
| 1235 | FASN Fatty acid synthase                                                | IPI00026781                                     | 273,382.00 | 60 | 70 | FDASFFGVHPK                       | R | Q | 1,251.62 |

|      |                                                                                                                                         |                                                                         |            |    |    |                                |   |   |          |
|------|-----------------------------------------------------------------------------------------------------------------------------------------|-------------------------------------------------------------------------|------------|----|----|--------------------------------|---|---|----------|
| 1236 | FASN Fatty acid synthase                                                                                                                | IP100026781                                                             | 273,382.00 | 60 | 70 | FDASFFGVHPK                    | R | Q | 1,251.62 |
| 1237 | CCT4 T-complex protein 1 subunit delta                                                                                                  | IP100302927,IP100873222                                                 | 57,907.90  | 60 | 79 | MIQDGGKGDVITITNDGATILK         | K | Q | 2,106.08 |
| 1238 | ARD1A N-terminal acetyltransferase complex ARD1 subunit homolog A                                                                       | IP100013184                                                             | 26,441.00  | 60 | 78 | MEEDPDDVPHGHITSLAVK            | K | R | 2,089.99 |
| 1239 | HMG2 Non-histone chromosomal protein HMG-17                                                                                             | IP100217950                                                             | 9,375.10   | 60 | 76 | ADAGKEGNNPAENGDAK              | K | T | 1,657.74 |
| 1240 | SNF8 Isoform 1 of Vacuolar-sorting protein SNF8                                                                                         | IP100101524,IP100640699                                                 | 28,846.90  | 60 | 65 | KNPEFR                         | R | V | 790.4206 |
| 1241 | HIST1H4H;HIST2H4A;HIST4H4;HIST1H4F;HIST1H4D;HIST1H4K;HIST1H4C;HIST1H4J;HIST1H4A;HIST1H4I;HIST1H4B;HIST2H4B;HIST1H4E;HIST1H4I Histone H4 | IP100453473                                                             | 11,349.70  | 61 | 68 | VFLENVIR                       | K | D | 989.5778 |
| 1242 | HIST1H4H;HIST2H4A;HIST4H4;HIST1H4F;HIST1H4D;HIST1H4K;HIST1H4C;HIST1H4J;HIST1H4A;HIST1H4I;HIST1H4B;HIST2H4B;HIST1H4E;HIST1H4I Histone H4 | IP100453473                                                             | 11,349.70  | 61 | 68 | VFLENVIR                       | K | D | 989.5778 |
| 1243 | HIST1H4H;HIST2H4A;HIST4H4;HIST1H4F;HIST1H4D;HIST1H4K;HIST1H4C;HIST1H4J;HIST1H4A;HIST1H4I;HIST1H4B;HIST2H4B;HIST1H4E;HIST1H4I Histone H4 | IP100453473                                                             | 11,349.70  | 61 | 68 | VFLENVIR                       | K | D | 989.5778 |
| 1244 | HIST1H4H;HIST2H4A;HIST4H4;HIST1H4F;HIST1H4D;HIST1H4K;HIST1H4C;HIST1H4J;HIST1H4A;HIST1H4I;HIST1H4B;HIST2H4B;HIST1H4E;HIST1H4I Histone H4 | IP100453473                                                             | 11,349.70  | 61 | 68 | VFLENVIR                       | K | D | 989.5778 |
| 1245 | HIST1H4H;HIST2H4A;HIST4H4;HIST1H4F;HIST1H4D;HIST1H4K;HIST1H4C;HIST1H4J;HIST1H4A;HIST1H4I;HIST1H4B;HIST2H4B;HIST1H4E;HIST1H4I Histone H4 | IP100453473                                                             | 11,349.70  | 61 | 68 | VFLENVIR                       | K | D | 989.5778 |
| 1246 | HNRNPA2B1 43 kDa protein                                                                                                                | IP100874030                                                             | 43,234.30  | 61 | 76 | SAAGNRAEATESAMER               | R | E | 1,666.74 |
| 1247 | HNRNPA2B1 43 kDa protein                                                                                                                | IP100874030                                                             | 43,234.30  | 61 | 76 | SAAGNRAEATESAMER               | R | E | 1,666.74 |
| 1248 | RAN GTP-binding nuclear protein Ran                                                                                                     | IP100643041,IP100795671                                                 | 24,405.10  | 61 | 71 | FNVDWTAGQEK                    | K | F | 1,294.61 |
| 1249 | NSDHL Sterol-4-alpha-carboxylate 3-dehydrogenase, decarboxylating                                                                       | IP100019407,IP100646262                                                 | 41,882.80  | 61 | 79 | GYAVNVFDIQGGFDNPQVR            | R | F | 2,167.06 |
| 1250 | SLC25A5 ADP/ATP translocase 2                                                                                                           | IP100007188                                                             | 32,878.50  | 61 | 72 | IPKEQGVLSFWR                   | R | G | 1,459.81 |
| 1251 | SLC25A6 ADP/ATP translocase 3                                                                                                           | IP100291467                                                             | 32,849.10  | 61 | 72 | IPKEQGVLSFWR                   | R | G | 1,459.81 |
| 1252 | PSMA7 Isoform 1 of Proteasome subunit alpha type-7                                                                                      | IP100024175                                                             | 27,869.10  | 61 | 81 | KICALDDNVCMFAAGLTADAR          | R | I | 2,328.08 |
| 1253 | ILF2 Interleukin enhancer-binding factor 2                                                                                              | IP100005198,IP100872107                                                 | 43,044.70  | 61 | 80 | NQDLAPNSAEQASILSLVTK           | R | I | 2,099.10 |
| 1254 | DNM1L Isoform 5 of Dynamin-1-like protein                                                                                               | IP100037283,IP100146935,IP100235412,IP100473085,IP100555883,IP100871742 | 79,093.20  | 61 | 76 | RPLILQLVHVSQEDKR               | R | K | 1,931.12 |
| 1255 | DNM1L Isoform 5 of Dynamin-1-like protein                                                                                               | IP100037283,IP100146935,IP100235412,IP100473085,IP100555883,IP100871742 | 79,093.20  | 61 | 76 | RPLILQLVHVSQEDKR               | R | K | 1,931.12 |
| 1256 | YWHAZ 14-3-3 protein zeta/delta                                                                                                         | IP100021263                                                             | 27,727.90  | 61 | 74 | VVSSIEQKTEGAEK                 | R | K | 1,504.79 |
| 1257 | YWHAB Isoform Short of 14-3-3 protein beta/alpha                                                                                        | IP100759832                                                             | 27,832.80  | 61 | 71 | VISSIEQKTER                    | R | N | 1,289.71 |
| 1258 | YWHAZ 14-3-3 protein zeta/delta                                                                                                         | IP100021263                                                             | 27,727.90  | 61 | 75 | VVSSIEQKTEGAEEK                | R | Q | 1,632.88 |
| 1259 | UROD Uroporphyrinogen decarboxylase                                                                                                     | IP100301489,IP100514944                                                 | 40,769.20  | 61 | 74 | SPEACCELTLQPLR                 | R | R | 1,673.80 |
| 1260 | TMPO Isoform Beta of Lamina-associated polypeptide 2, isoforms beta/gamma                                                               | IP100030131                                                             | 50,653.40  | 61 | 86 | GPPDFSSDEEREPTVPLGSG           | K | S | 2,570.21 |
| 1261 | TMPO Lamina-associated polypeptide 2, isoform alpha                                                                                     | IP100216230                                                             | 75,475.80  | 61 | 86 | AAAAGR<br>GPPDFSSDEEREPTVPLGSG | K | S | 2,570.21 |
| 1262 | SSB Lupus La protein                                                                                                                    | IP100009032,IP100916802                                                 | 46,821.00  | 61 | 74 | LTTDFNVIVEALSK                 | R | S | 1,549.85 |
| 1263 | SNCA Isoform 1 of Alpha-synuclein                                                                                                       | IP100024107,IP100218467                                                 | 14,441.30  | 61 | 80 | EQVTNVGGAVVTGVTAVAQK           | K | T | 1,928.04 |
| 1264 | DNM1L Isoform 5 of Dynamin-1-like protein                                                                                               | IP100037283,IP100146935,IP100235412,IP100473085,IP100555883,IP100871742 | 79,093.20  | 61 | 77 | RPLILQLVHVSQEDKRK              | R | T | 2,059.21 |
| 1265 | VPS29 Isoform 1 of Vacuolar protein sorting-associated protein 29                                                                       | IP100170796,IP100184284,IP100798102                                     | 20,488.10  | 61 | 73 | GDFDENLNYPEQK                  | R | V | 1,568.69 |
| 1266 | VPS29 Isoform 1 of Vacuolar protein sorting-associated protein 29                                                                       | IP100170796,IP100184284,IP100798102                                     | 20,488.10  | 61 | 73 | GDFDENLNYPEQK                  | R | V | 1,568.69 |
| 1267 | HSPD1 60 kDa heat shock protein, mitochondrial                                                                                          | IP100784154                                                             | 61,037.70  | 61 | 72 | TVIIQSWGSPK                    | R | V | 1,344.72 |
| 1268 | TTL3;ARPC4 Actin-related protein 2/3 complex subunit 4                                                                                  | IP100554811,IP100790262                                                 | 19,649.40  | 61 | 71 | VLIQSGINSVR                    | K | V | 1,186.68 |
| 1269 | DNAJC12 Isoform a of DnaJ homolog subfamily C member 12                                                                                 | IP100029149,IP100220169                                                 | 23,397.30  | 62 | 72 | AKEILTNEESR                    | K | A | 1,289.67 |

|      |                                                                       |                                     |           |    |    |                                                           |             |   |          |
|------|-----------------------------------------------------------------------|-------------------------------------|-----------|----|----|-----------------------------------------------------------|-------------|---|----------|
| 1270 | MAT2A S-adenosylmethionine synthetase isoform type-2                  | IPI00010157                         | 43,642.80 | 62 | 74 | TGMILLAGEITSR                                             | K           | A | 1,377.74 |
| 1271 | RPS14 40S ribosomal protein S14                                       | IPI00026271                         | 16,254.90 | 62 | 84 | VKADRDESSPYAAMLAQDV<br>AQR                                | K           | C | 2,508.21 |
| 1272 | DNAJA1 DnaJ homolog subfamily A member 1                              | IPI00012535                         | 44,850.60 | 62 | 73 | ELYDKGGEQAIK                                              | R           | E | 1,350.69 |
| 1273 | YWHAE 14-3-3 protein epsilon                                          | IPI00000816                         | 29,157.00 | 62 | 69 | IISSIEQK                                                  | R           | E | 917.5303 |
| 1274 | PSAT1 cDNA FLJ56437, highly similar to Phosphoserine aminotransferase | IPI00001734                         | 45,338.10 | 62 | 72 | LPHSVLLEIQK                                               | K           | E | 1,276.76 |
| 1275 | RAB1A Isoform 1 of Ras-related protein Rab-1A                         | IPI00005719,IPI00873902             | 22,660.40 | 62 | 72 | LQIWDTAGQER                                               | K           | F | 1,316.66 |
| 1276 | YWHAE 14-3-3 protein epsilon                                          | IPI00000816                         | 29,157.00 | 62 | 73 | IISSIEQKEENK                                              | R           | G | 1,417.75 |
| 1277 | SAP18 Sin3A-associated protein, 18kDa                                 | IPI00011698                         | 19,508.80 | 62 | 67 | MDEFSSR                                                   | R           | G | 784.3294 |
| 1278 | UBE2S Ubiquitin-conjugating enzyme E2 S                               | IPI00217949                         | 23,828.40 | 62 | 76 | MKLLLGKDFPASPPK                                           | R           | G | 1,657.94 |
| 1279 | TSEN34 27 kDa protein                                                 | IPI00657943,IPI00658061,IPI00894217 | 27,261.80 | 62 | 80 | LLAEIGAVTLVSAPRPDSR                                       | R           | H | 1,965.11 |
| 1280 | HSPB11 Heat shock protein beta-11                                     | IPI00098827,IPI00333618             | 16,279.20 | 62 | 73 | LVIQSYFVQTLK                                              | R           | I | 1,438.83 |
| 1281 | RPLP2 60S acidic ribosomal protein P2                                 | IPI00008529                         | 11,647.40 | 62 | 94 | LASVPAGGAVAVSAAPGSAAP<br>AAGSAPAAAEK<br>HPNIVSLQDVLMDQDSR | K<br>K<br>R | K | 2,774.43 |
| 1282 | CDC2 Putative uncharacterized protein DKFZp686L20222                  | IPI00026689                         | 34,762.10 | 62 | 77 | HPNIVSLQDVLMDQDSR                                         | R           | L | 1,867.93 |
| 1283 | HSPA5 HSPA5 protein                                                   | IPI00003362                         | 72,405.60 | 62 | 75 | ITPSYVAFTPEGER                                            | R           | L | 1,566.78 |
| 1284 | SAE1 SUMO-activating enzyme subunit 1                                 | IPI00033130,IPI00640965,IPI00647006 | 38,432.10 | 62 | 83 | GLTMLDHEQVTPEDPGAQFLI<br>R                                | K           | T | 2,483.22 |
| 1285 | SAE1 SUMO-activating enzyme subunit 1                                 | IPI00033130,IPI00640965,IPI00647006 | 38,432.10 | 62 | 83 | GLTMLDHEQVTPEDPGAQFLI<br>R                                | K           | T | 2,483.22 |
| 1286 | UBE2K Isoform 1 of Ubiquitin-conjugating enzyme E2 K                  | IPI00021370,IPI00910176             | 22,389.10 | 62 | 72 | IPETYPFNPPK                                               | K           | V | 1,302.67 |
| 1287 | RAB11B Ras-related protein Rab-11B                                    | IPI00020436                         | 24,471.00 | 62 | 72 | AQIWDTAGQER                                               | K           | Y | 1,274.61 |
| 1288 | LMNA Isoform A of Lamin-A/C                                           | IPI00021405                         | 74,122.60 | 63 | 72 | ITESEEVVSR                                                | R           | E | 1,148.58 |
| 1289 | CCT8 T-complex protein 1 subunit theta                                | IPI00784090                         | 59,603.00 | 63 | 74 | LFVTNDAATILR                                              | K           | E | 1,333.75 |
| 1290 | GATAD2A Isoform 1 of Transcriptional repressor p66-alpha              | IPI00410330,IPI00444526,IPI00478128 | 68,044.80 | 63 | 73 | ATEATAMAMGR                                               | R           | G | 1,141.50 |
| 1291 | PEBP1 Phosphatidylethanolamine-binding protein 1                      | IPI00219446                         | 21,038.90 | 63 | 76 | LYTLVLTPDAPSR                                             | K           | K | 1,560.83 |
| 1292 | MORF4L2 Mortality factor 4-like protein 2                             | IPI00014174                         | 32,290.70 | 63 | 73 | SAENPPSGSVR                                               | R           | K | 1,100.53 |
| 1293 | PSMA1 Isoform Short of Proteasome subunit alpha type-1                | IPI00016832,IPI00472442             | 29,538.00 | 63 | 82 | ILHVDNHIGISIAGLTADAR                                      | K           | L | 2,086.14 |
| 1294 | TAF9B;LOC728198 Transcription initiation factor TFIID subunit 9B      | IPI00642105                         | 27,604.50 | 63 | 72 | KPNVDADDVR                                                | K           | L | 1,128.56 |
| 1295 | PDIA3 Protein disulfide-isomerase A3                                  | IPI00025252                         | 56,766.60 | 63 | 73 | LAPEYEAATR                                                | R           | L | 1,191.60 |
| 1296 | MARCH5 E3 ubiquitin-protein ligase MARCH5                             | IPI00414168                         | 31,213.80 | 63 | 78 | VACPQCNAEYLIVFPK                                          | R           | L | 1,908.93 |
| 1297 | CDKN2A Cyclin-dependent kinase inhibitor 2A, isoform 4                | IPI00478390                         | 17,987.80 | 63 | 70 | VFVHPIPR                                                  | R           | L | 966.5883 |
| 1298 | PSMB2 Proteasome subunit beta type-2                                  | IPI00028006                         | 22,819.50 | 63 | 68 | NVQLYK                                                    | K           | M | 764.4301 |
| 1299 | ERLIN1 ER lipid raft associated 1                                     | IPI00007940                         | 39,154.00 | 63 | 74 | SVQTTLQTDEVK                                              | R           | N | 1,348.70 |
| 1300 | TUBB Tubulin beta chain                                               | IPI00011654                         | 49,652.60 | 63 | 77 | AILVDLEPGTMDSVR                                           | R           | S | 1,631.83 |
| 1301 | TUBB Tubulin beta chain                                               | IPI00011654                         | 49,652.60 | 63 | 77 | AILVDLEPGTMDSVR                                           | R           | S | 1,631.83 |
| 1302 | TUBB Tubulin beta chain                                               | IPI00011654                         | 49,652.60 | 63 | 77 | AILVDLEPGTMDSVR                                           | R           | S | 1,631.83 |
| 1303 | TUBB Tubulin beta chain                                               | IPI00011654                         | 49,652.60 | 63 | 77 | AILVDLEPGTMDSVR                                           | R           | S | 1,615.84 |
| 1304 | TUBB Tubulin beta chain                                               | IPI00011654                         | 49,652.60 | 63 | 77 | AILVDLEPGTMDSVR                                           | R           | S | 1,615.84 |
| 1305 | TUBB2A Tubulin beta-2A chain                                          | IPI00013475,IPI00031370             | 49,889.10 | 63 | 77 | AILVDLEPGTMDSVR                                           | R           | S | 1,615.84 |
| 1306 | TUBB2A Tubulin beta-2A chain                                          | IPI00013475,IPI00031370             | 49,889.10 | 63 | 77 | AILVDLEPGTMDSVR                                           | R           | S | 1,615.84 |
| 1307 | TUBB2C Tubulin beta-2C chain                                          | IPI00007752                         | 49,812.70 | 63 | 77 | AVLVDLEPGTMDSVR                                           | R           | S | 1,617.82 |
| 1308 | TUBB2C Tubulin beta-2C chain                                          | IPI00007752                         | 49,812.70 | 63 | 77 | AVLVDLEPGTMDSVR                                           | R           | S | 1,617.82 |
| 1309 | TUBB2C Tubulin beta-2C chain                                          | IPI00007752                         | 49,812.70 | 63 | 77 | AVLVDLEPGTMDSVR                                           | R           | S | 1,601.82 |
| 1310 | TUBB2C Tubulin beta-2C chain                                          | IPI00007752                         | 49,812.70 | 63 | 77 | AVLVDLEPGTMDSVR                                           | R           | S | 1,617.82 |
| 1311 | WDR82 WD repeat-containing protein 82                                 | IPI00152695                         | 35,062.40 | 63 | 70 | KYGVDLIR                                                  | K           | Y | 963.5623 |
| 1312 | NECAP2 Isoform 1 of Adaptin ear-binding coat-associated protein 2     | IPI00018188,IPI00073436,IPI00386318 | 28,321.00 | 63 | 89 | TSGELFAQAPVDQFPGTAVES<br>VTDSSR                           | R           | Y | 2,796.33 |



|      |                                                                                       |                                                                                                                                                                                                                                                                         |            |    |    |                      |   |   |          |
|------|---------------------------------------------------------------------------------------|-------------------------------------------------------------------------------------------------------------------------------------------------------------------------------------------------------------------------------------------------------------------------|------------|----|----|----------------------|---|---|----------|
| 1313 | YRDC YrdC domain-containing protein, mitochondrial                                    | IP100384180                                                                                                                                                                                                                                                             | 29,310.30  | 64 | 71 | AGWTEALR             | R | A | 903.4683 |
| 1314 | APEX1 DNA-(apurinic or apyrimidinic site) lyase                                       | IP100215911                                                                                                                                                                                                                                                             | 35,537.70  | 64 | 73 | ICSWNVVDGLR          | K | A | 1,219.59 |
| 1315 | ENSA Isoform 2 of Alpha-endosulfine                                                   | IP100220797,IP100383552,IP100410177,IP100410178,IP100410179,IP100410180,IP100410181,IP100470835,IP100644717,IP100872471                                                                                                                                                 | 12,958.10  | 64 | 74 | YFDSGDYDMAK          | K | A | 1,326.53 |
| 1316 | RPS14 40S ribosomal protein S14                                                       | IP100026271                                                                                                                                                                                                                                                             | 16,254.90  | 64 | 84 | ADREDESSPYAAMLAQDVAQ | K | C | 2,281.05 |
| 1317 | PARK7 Protein DJ-1                                                                    | IP100298547                                                                                                                                                                                                                                                             | 19,873.10  | 64 | 89 | EGPYDVVVLPGGNLGAQNLS | K | E | 2,584.33 |
| 1318 | RAB6A Isoform 1 of Ras-related protein Rab-6A                                         | IP100023526,IP100217943                                                                                                                                                                                                                                                 | 23,575.30  | 64 | 74 | LQLWDTAGQER          | R | F | 1,316.66 |
| 1319 | SLC25A5 ADP/ATP translocase 2                                                         | IP100007188                                                                                                                                                                                                                                                             | 32,878.50  | 64 | 72 | EQGVLSFWR            | K | G | 1,121.57 |
| 1320 | SLC25A6 ADP/ATP translocase 3                                                         | IP100291467                                                                                                                                                                                                                                                             | 32,849.10  | 64 | 72 | EQGVLSFWR            | K | G | 1,121.57 |
| 1321 | UBE2S Ubiquitin-conjugating enzyme E2 S                                               | IP100217949                                                                                                                                                                                                                                                             | 23,828.40  | 64 | 76 | LLLGKDFPASPPK        | K | G | 1,382.80 |
| 1322 | C2orf68 Isoform 1 of UPF0561 protein C2orf68                                          | IP100419111,IP100874184                                                                                                                                                                                                                                                 | 18,732.70  | 64 | 73 | KPDLQVYVLP           | R | H | 1,228.71 |
| 1323 | DHX9 ATP-dependent RNA helicase A                                                     | IP100844578                                                                                                                                                                                                                                                             | 140,943.50 | 64 | 71 | DFVNYLVR             | R | I | 1,025.54 |
| 1324 | DHX9 ATP-dependent RNA helicase A                                                     | IP100844578                                                                                                                                                                                                                                                             | 140,943.50 | 64 | 71 | DFVNYLVR             | R | I | 1,025.54 |
| 1325 | DHX9 ATP-dependent RNA helicase A                                                     | IP100844578                                                                                                                                                                                                                                                             | 140,943.50 | 64 | 71 | DFVNYLVR             | R | I | 1,025.54 |
| 1326 | HIST1H1C Histone H1.2                                                                 | IP100217465                                                                                                                                                                                                                                                             | 21,347.80  | 64 | 79 | KALAAAGYDVEKNNSR     | K | I | 1,706.88 |
| 1327 | HIST1H1C Histone H1.2                                                                 | IP100217465                                                                                                                                                                                                                                                             | 21,347.80  | 64 | 79 | KALAAAGYDVEKNNSR     | K | I | 1,706.88 |
| 1328 | UBE2S Ubiquitin-conjugating enzyme E2 S                                               | IP100217949                                                                                                                                                                                                                                                             | 23,828.40  | 64 | 82 | LLLGKDFPASPPKGYFLTK  | K | I | 2,092.18 |
| 1329 | EZR Ezrin                                                                             | IP100746388,IP100843975,IP100872684                                                                                                                                                                                                                                     | 69,265.40  | 64 | 70 | VSAQEV               | K | K | 788.426  |
| 1330 | UBB;RPS27A;UBC ubiquitin and ribosomal protein S27a precursor                         | IP100179330,IP100456429,IP100719280,IP100743241,IP100743650,IP100744274,IP100784990,IP100789107,IP100789823,IP100790633,IP100792712,IP100793330,IP100793729,IP100793810,IP100794211,IP100794925,IP100795527,IP100796007,IP100796600,IP100797400,IP100798127,IP100798155 | 17,947.60  | 64 | 72 | ESTLHLVLR            | K | L | 1,067.62 |
| 1331 | UBB;RPS27A;UBC ubiquitin and ribosomal protein S27a precursor                         | IP100179330,IP100456429,IP100719280,IP100743241,IP100743650,IP100744274,IP100784990,IP100789107,IP100789823,IP100790633,IP100792712,IP100793330,IP100793729,IP100793810,IP100794211,IP100794925,IP100795527,IP100796007,IP100796600,IP100797400,IP100798127,IP100798155 | 17,947.60  | 64 | 72 | ESTLHLVLR            | K | L | 1,067.62 |
| 1332 | UBB;RPS27A;UBC ubiquitin and ribosomal protein S27a precursor                         | IP100179330,IP100456429,IP100719280,IP100743241,IP100743650,IP100744274,IP100784990,IP100789107,IP100789823,IP100790633,IP100792712,IP100793330,IP100793729,IP100793810,IP100794211,IP100794925,IP100795527,IP100796007,IP100796600,IP100797400,IP100798127,IP100798155 | 17,947.60  | 64 | 72 | ESTLHLVLR            | K | L | 1,067.62 |
| 1333 | UBB;RPS27A;UBC ubiquitin and ribosomal protein S27a precursor                         | IP100179330,IP100456429,IP100719280,IP100743241,IP100743650,IP100744274,IP100784990,IP100789107,IP100789823,IP100790633,IP100792712,IP100793330,IP100793729,IP100793810,IP100794211,IP100794925,IP100795527,IP100796007,IP100796600,IP100797400,IP100798127,IP100798155 | 17,947.60  | 64 | 72 | ESTLHLVLR            | K | L | 1,067.62 |
| 1334 | UBB;RPS27A;UBC ubiquitin and ribosomal protein S27a precursor                         | IP100179330,IP100456429,IP100719280,IP100743241,IP100743650,IP100744274,IP100784990,IP100789107,IP100789823,IP100790633,IP100792712,IP100793330,IP100793729,IP100793810,IP100794211,IP100794925,IP100795527,IP100796007,IP100796600,IP100797400,IP100798127,IP100798155 | 17,947.60  | 64 | 72 | ESTLHLVLR            | K | L | 1,067.62 |
| 1335 | UBB;RPS27A;UBC ubiquitin and ribosomal protein S27a precursor                         | IP100179330,IP100456429,IP100719280,IP100743241,IP100743650,IP100744274,IP100784990,IP100789107,IP100789823,IP100790633,IP100792712,IP100793330,IP100793729,IP100793810,IP100794211,IP100794925,IP100795527,IP100796007,IP100796600,IP100797400,IP100798127,IP100798155 | 17,947.60  | 64 | 72 | ESTLHLVLR            | K | L | 1,067.62 |
| 1336 | NDUFA4 NADH dehydrogenase [ubiquinone] 1 alpha subcomplex subunit 4                   | IP100011770                                                                                                                                                                                                                                                             | 9,352.40   | 64 | 73 | FYSVNVVDYSK          | K | L | 1,221.58 |
| 1337 | RPSA 33 kDa protein                                                                   | IP100413108,IP100553164,IP100793137,IP100847766                                                                                                                                                                                                                         | 33,295.50  | 64 | 80 | AIVAIENPADVSVISSR    | R | N | 1,740.95 |
| 1338 | HIST1H1C Histone H1.2                                                                 | IP100217465                                                                                                                                                                                                                                                             | 21,347.80  | 64 | 75 | KALAAAGYDVEK         | K | N | 1,235.66 |
| 1339 | RPL21;LOC729402 60S ribosomal protein L21                                             | IP100247583,IP100887074,IP100888913                                                                                                                                                                                                                                     | 18,547.00  | 64 | 78 | VYNVVQHAVGIVVVK      | R | Q | 1,640.91 |
| 1340 | TUBG1 Tubulin gamma-1 chain                                                           | IP100295081,IP100299830                                                                                                                                                                                                                                                 | 51,153.20  | 64 | 72 | AVLLDLEPR            | R | V | 1,025.60 |
| 1341 | SEC11A Signal peptidase complex catalytic subunit SEC11A                              | IP100104128,IP100873253,IP100873608                                                                                                                                                                                                                                     | 20,607.80  | 64 | 72 | GDLLFLTNR            | R | V | 1,048.58 |
| 1342 | TCP1 T-complex protein 1 subunit alpha                                                | IP100290566                                                                                                                                                                                                                                                             | 60,327.20  | 64 | 73 | LLEVEHPAAK           | K | V | 1,106.62 |
| 1343 | VDAC3 Isoform 1 of Voltage-dependent anion-selective channel protein 3                | IP100031804,IP100294779                                                                                                                                                                                                                                                 | 30,641.90  | 64 | 74 | VCNYGLTFTQK          | K | W | 1,330.65 |
| 1344 | WDR82 WD repeat-containing protein 82                                                 | IP100152695                                                                                                                                                                                                                                                             | 35,062.40  | 64 | 70 | YGVDLIR              | K | Y | 835.4673 |
| 1345 | CHCHD3 Coiled-coil-helix-coiled-coil-helix domain-containing protein 3, mitochondrial | IP100015833                                                                                                                                                                                                                                                             | 26,134.50  | 65 | 77 | RVAEELALEQAKK        | R | E | 1,484.84 |
| 1346 | SNRPB Isoform SM-B' of Small nuclear ribonucleoprotein-associated proteins B and B'   | IP100027285,IP100220360,IP100329512,IP100395674,IP100785142,IP100844420,IP100877103                                                                                                                                                                                     | 24,592.60  | 65 | 73 | RVLGLVLLR            | K | G | 1,038.71 |

|      |                                                                                       |                                                                                     |           |    |    |                                      |   |   |          |
|------|---------------------------------------------------------------------------------------|-------------------------------------------------------------------------------------|-----------|----|----|--------------------------------------|---|---|----------|
| 1347 | SFRS6 Isoform SRP55-1 of Splicing factor, arginine/serine-rich 6                      | IPI00012345,IPI00215879,IPI00556297                                                 | 39,570.40 | 65 | 71 | VIVEHAR                              | R | G | 823.4784 |
| 1348 | HIST1H1C Histone H1.2                                                                 | IPI00217465                                                                         | 21,347.80 | 65 | 79 | ALAAAGYDVEKNNSR                      | K | I | 1,578.79 |
| 1349 | HIST1H1C Histone H1.2                                                                 | IPI00217465                                                                         | 21,347.80 | 65 | 79 | ALAAAGYDVEKNNSR                      | K | I | 1,578.79 |
| 1350 | PCNA Proliferating cell nuclear antigen                                               | IPI00021700                                                                         | 28,751.30 | 65 | 77 | NLAMGVNLTSMMSK                       | R | I | 1,381.68 |
| 1351 | G3BP1 Ras GTPase-activating protein-binding protein 1                                 | IPI00012442                                                                         | 52,144.80 | 65 | 76 | VMSQNFNTCHTK                         | K | I | 1,466.65 |
| 1352 | HEBP1 Heme-binding protein 1                                                          | IPI00148063                                                                         | 21,079.40 | 65 | 97 | YAGGTNDKIGMGMTVPISFA<br>VFPNEDGSLQKK | K | L | 3,461.67 |
| 1353 | HIST1H1C Histone H1.2                                                                 | IPI00217465                                                                         | 21,347.80 | 65 | 75 | ALAAAGYDVEK                          | K | N | 1,107.57 |
| 1354 | HIST1H1C Histone H1.2                                                                 | IPI00217465                                                                         | 21,347.80 | 65 | 75 | ALAAAGYDVEK                          | K | N | 1,107.57 |
| 1355 | HIST1H1C Histone H1.2                                                                 | IPI00217465                                                                         | 21,347.80 | 65 | 75 | ALAAAGYDVEK                          | K | N | 1,107.57 |
| 1356 | ATIC Bifunctional purine biosynthesis protein PURH                                    | IPI00289499                                                                         | 64,598.50 | 65 | 79 | VKTLHPAVHAGILAR                      | R | N | 1,582.95 |
| 1357 | DRG2 Developmentally-regulated GTP-binding protein 2                                  | IPI00022697,IPI00794194                                                             | 40,729.80 | 65 | 75 | VALIGFPSVGK                          | R | S | 1,087.65 |
| 1358 | TUBA1A Tubulin alpha-1A chain                                                         | IPI00180675                                                                         | 50,117.70 | 65 | 79 | AVFVDLEPTVIDEVR                      | R | T | 1,701.91 |
| 1359 | TUBA1A Tubulin alpha-1A chain                                                         | IPI00180675                                                                         | 50,117.70 | 65 | 79 | AVFVDLEPTVIDEVR                      | R | T | 1,701.91 |
| 1360 | TUBA1A Tubulin alpha-1A chain                                                         | IPI00180675                                                                         | 50,117.70 | 65 | 79 | AVFVDLEPTVIDEVR                      | R | T | 1,701.91 |
| 1361 | TUBA1A Tubulin alpha-1A chain                                                         | IPI00180675                                                                         | 50,117.70 | 65 | 79 | AVFVDLEPTVIDEVR                      | R | T | 1,701.91 |
| 1362 | TUBA1A Tubulin alpha-1A chain                                                         | IPI00180675                                                                         | 50,117.70 | 65 | 79 | AVFVDLEPTVIDEVR                      | R | T | 1,701.91 |
| 1363 | TUBA1A Tubulin alpha-1A chain                                                         | IPI00180675                                                                         | 50,117.70 | 65 | 79 | AVFVDLEPTVIDEVR                      | R | T | 1,701.91 |
| 1364 | TUBA1C Tubulin alpha-1C chain                                                         | IPI00218343                                                                         | 49,877.40 | 65 | 79 | AVFVDLEPTVIDEVR                      | R | T | 1,701.91 |
| 1365 | TUBA1B Tubulin alpha-1B chain                                                         | IPI00387144,IPI00792677                                                             | 50,133.70 | 65 | 79 | AVFVDLEPTVIDEVR                      | R | T | 1,701.91 |
| 1366 | TUBA1B Tubulin alpha-1B chain                                                         | IPI00387144,IPI00792677                                                             | 50,133.70 | 65 | 79 | AVFVDLEPTVIDEVR                      | R | T | 1,701.91 |
| 1367 | RUVBL1 Isoform 1 of RuvB-like 1                                                       | IPI00021187                                                                         | 50,211.40 | 65 | 76 | AVLLAGPPGTGK                         | R | T | 1,080.64 |
| 1368 | PSMD9 Isoform p27-L of 26S proteasome non-ATPase regulatory subunit 9                 | IPI00010860,IPI00216220,IPI00791380                                                 | 24,635.20 | 65 | 73 | SDVDLYQVR                            | R | T | 1,094.55 |
| 1369 | UCHL1 Ubiquitin carboxyl-terminal hydrolase isozyme L1                                | IPI00018352                                                                         | 24,806.30 | 65 | 78 | KQIEELKGQEVSPK                       | K | V | 1,612.89 |
| 1370 | B3GNT1 N-acetylglucosaminide beta-1,3-N-acetylglucosaminyltransferase                 | IPI00009997                                                                         | 47,101.40 | 65 | 80 | TALASGGVLDASGDYR                     | R | V | 1,552.76 |
| 1371 | ADRM1 Proteasomal ubiquitin receptor ADRM1                                            | IPI00033030,IPI00470921                                                             | 42,136.20 | 65 | 84 | TSGNVEDDLIIFPDDCEFKR                 | R | V | 2,370.09 |
| 1372 | TARS Threonyl-tRNA synthetase, cytoplasmic                                            | IPI00329633,IPI00908949                                                             | 83,419.80 | 66 | 75 | AEHDSILAEK                           | K | A | 1,112.56 |
| 1373 | TARS Threonyl-tRNA synthetase, cytoplasmic                                            | IPI00329633,IPI00908949                                                             | 83,419.80 | 66 | 78 | AEHDSILAEKAEK                        | K | D | 1,440.73 |
| 1374 | CHCHD3 Coiled-coil-helix-coiled-coil-helix domain-containing protein 3, mitochondrial | IPI00015833                                                                         | 26,134.50 | 66 | 77 | VAEELALEQAKK                         | R | E | 1,328.74 |
| 1375 | TBPL1 TATA box-binding protein-like protein 1                                         | IPI00032911,IPI00640447,IPI00641052,IPI00641561                                     | 20,868.90 | 66 | 78 | IICTGATSEEEAK                        | K | F | 1,408.66 |
| 1376 | RPS3A 40S ribosomal protein S3a                                                       | IPI00419880,IPI00472119                                                             | 29,927.30 | 66 | 83 | VFEVSLADLQNDDEVAFRK                  | R | F | 2,080.07 |
| 1377 | CNBP Isoform 1 of Cellular nucleic acid-binding protein                               | IPI00430812,IPI00430813,IPI00430814                                                 | 19,444.10 | 66 | 79 | DCDLQEDACYNCGR                       | K | G | 1,775.64 |
| 1378 | SNRNP Isoform SM-B' of Small nuclear ribonucleoprotein-associated proteins B and B'   | IPI00027285,IPI00220360,IPI00329512,IPI00395674,IPI00785142,IPI00844420,IPI00877103 | 24,592.60 | 66 | 73 | VLGLVLLR                             | R | G | 882.6136 |
| 1379 | SNRNP Isoform SM-B' of Small nuclear ribonucleoprotein-associated proteins B and B'   | IPI00027285,IPI00220360,IPI00329512,IPI00395674,IPI00785142,IPI00844420,IPI00877103 | 24,592.60 | 66 | 73 | VLGLVLLR                             | R | G | 882.6136 |
| 1380 | RRM2 Ribonucleoside-diphosphate reductase M2 subunit                                  | IPI00011118                                                                         | 51,076.50 | 66 | 83 | VPLAPITDPQQLQLSPLK                   | R | G | 1,958.13 |
| 1381 | ANP32B Isoform 1 of Acidic leucine-rich nuclear phosphoprotein 32 family member B     | IPI00007423,IPI00759824                                                             | 28,770.60 | 66 | 75 | LKKLELSENR                           | K | I | 1,229.72 |
| 1382 | CHCHD3 Coiled-coil-helix-coiled-coil-helix domain-containing protein 3, mitochondrial | IPI00015833                                                                         | 26,134.50 | 66 | 76 | VAEELALEQAK                          | R | K | 1,200.65 |
| 1383 | NUDT4;NUDT4P1 Isoform 2 of Diphosphoinositol polyphosphate phosphohydrolase 2         | IPI00021408,IPI00607685                                                             | 20,416.00 | 66 | 76 | EVYEEAGVKGK                          | R | L | 1,208.62 |
| 1384 | EIF3I Eukaryotic translation initiation factor 3 subunit I                            | IPI00012795                                                                         | 36,484.00 | 66 | 77 | HVLTGSADNSCR                         | K | L | 1,316.60 |
| 1385 | TES Isoform 1 of Testin                                                               | IPI00024097,IPI00216425,IPI00873055                                                 | 47,977.60 | 66 | 78 | LFEDTKYTTLIAK                        | K | L | 1,542.84 |
| 1386 | WDR1 Isoform 1 of WD repeat-containing protein 1                                      | IPI00746165,IPI00873622                                                             | 66,175.20 | 66 | 81 | YAPSGFYIASGDVSGK                     | K | L | 1,618.77 |
| 1387 | BAX Isoform Epsilon of Apoptosis regulator BAX                                        | IPI00071059,IPI00443773,IPI00444945,IPI00845474                                     | 18,111.40 | 66 | 78 | IGDELDSNMELQR                        | R | M | 1,535.70 |

|      |                                                                                         |                                                 |            |    |    |                       |   |   |          |
|------|-----------------------------------------------------------------------------------------|-------------------------------------------------|------------|----|----|-----------------------|---|---|----------|
| 1388 | PITPNB Isoform 1 of Phosphatidylinositol transfer protein beta isoform                  | IPI00334907                                     | 31,522.30  | 66 | 73 | SKVPAFVR              | K | M | 903.541  |
| 1389 | PITPNB Isoform 1 of Phosphatidylinositol transfer protein beta isoform                  | IPI00334907                                     | 31,522.30  | 66 | 73 | SKVPAFVR              | K | M | 903.541  |
| 1390 | RBM3 Putative RNA-binding protein 3                                                     | IPI00024320                                     | 17,152.60  | 66 | 75 | AMNGESLDGR            | R | Q | 1,049.47 |
| 1391 | SELS Selenoprotein S                                                                    | IPI00020468,IPI00793181,IPI00916735             | 21,098.40  | 66 | 77 | AAAAVEPDVVVK          | R | R | 1,168.66 |
| 1392 | UTP18 U3 small nucleolar RNA-associated protein 18 homolog                              | IPI00000733                                     | 64,046.80  | 66 | 87 | KPPARPSAAAAAIAVAAAEER | R | R | 2,147.16 |
| 1393 | RABGGTB Geranylgeranyl transferase type-2 subunit beta                                  | IPI00295849                                     | 36,907.20  | 66 | 76 | MNREEILAFIK           | R | S | 1,379.74 |
| 1394 | SRPRB Signal recognition particle receptor subunit beta                                 | IPI00295098                                     | 29,685.10  | 66 | 77 | AVLLVGLCDSGK          | R | T | 1,231.67 |
| 1395 | CHAC2 Cation transport regulator-like protein 2                                         | IPI00103047                                     | 20,857.10  | 67 | 76 | LPVGKEEEVK            | R | A | 1,127.63 |
| 1396 | C12orf44 UPF0453 protein C12orf44                                                       | IPI00305296                                     | 24,984.30  | 67 | 74 | VSSEELDR              | R | A | 934.4476 |
| 1397 | GAPDH Glycerinaldehyde-3-phosphate dehydrogenase                                        | IPI00219018                                     | 36,035.30  | 67 | 80 | LVINGNPITIFQER        | K | D | 1,613.90 |
| 1398 | HNRNPA2B1 43 kDa protein                                                                | IPI00874030                                     | 43,234.30  | 67 | 76 | AEATESAMER            | R | E | 1,110.47 |
| 1399 | SRP14 Signal recognition particle 14 kDa protein                                        | IPI00293434                                     | 14,552.60  | 67 | 74 | ISTVVSSK              | K | E | 820.4774 |
| 1400 | TBCB Tubulin folding cofactor B                                                         | IPI00293126                                     | 27,307.50  | 67 | 84 | LDQEDALLGSYPVDDGCR    | K | I | 2,022.91 |
| 1401 | GAPDH Glycerinaldehyde-3-phosphate dehydrogenase                                        | IPI00219018                                     | 36,035.30  | 67 | 84 | LVINGNPITIFQERDPSK    | K | I | 2,041.11 |
| 1402 | RPS25 40S ribosomal protein S25                                                         | IPI00012750                                     | 13,725.00  | 67 | 76 | LITPAVVSER            | K | L | 1,084.64 |
| 1403 | RPS25 40S ribosomal protein S25                                                         | IPI00012750                                     | 13,725.00  | 67 | 76 | LITPAVVSER            | K | L | 1,084.64 |
| 1404 | RPS25 40S ribosomal protein S25                                                         | IPI00012750                                     | 13,725.00  | 67 | 76 | LITPAVVSER            | K | L | 1,084.64 |
| 1405 | PKM2 Isoform M1 of Pyruvate kinase isozymes M1/M2                                       | IPI00220644,IPI00479186                         | 58,044.60  | 67 | 73 | SGMNVAR               | K | L | 734.3613 |
| 1406 | DRG1 Developmentally-regulated GTP-binding protein 1                                    | IPI00031836                                     | 40,525.80  | 67 | 77 | IGFVGFPVSGK           | R | S | 1,107.62 |
| 1407 | GPI Glucose-6-phosphate isomerase                                                       | IPI00027497                                     | 63,130.40  | 67 | 73 | MLVDLAK               | R | S | 805.449  |
| 1408 | MTHFD1 C-1-tetrahydrofolate synthase, cytoplasmic                                       | IPI00218342,IPI00794900                         | 101,543.50 | 67 | 74 | ATHIKLPR              | K | T | 935.5786 |
| 1409 | SSBP1 Single-stranded DNA-binding protein, mitochondrial                                | IPI00029744                                     | 17,241.70  | 67 | 81 | SGDSEVYQLGDVVSQK      | R | T | 1,611.75 |
| 1410 | PDZD11 Isoform 1 of PDZ domain-containing protein 11                                    | IPI00550841,IPI00641523                         | 16,113.50  | 67 | 76 | ASQLGIFISK            | K | V | 1,063.61 |
| 1411 | GRHPR Glyoxylate reductase/hydroxypyruvate reductase                                    | IPI00037448                                     | 35,651.10  | 67 | 76 | ILDAAGANLK            | R | V | 985.5678 |
| 1412 | UBL4A Ubiquitin-like protein 4A                                                         | IPI00005658                                     | 17,758.90  | 67 | 76 | LNLVVKPLEK            | K | V | 1,152.74 |
| 1413 | NP cDNA FLJ25678 fis, clone TST04067, highly similar to PURINE NUCLEOSIDE PHOSPHORYLASE | IPI00017672,IPI00871140                         | 32,533.50  | 68 | 76 | LVFGFLNGR             | R | A | 1,022.58 |
| 1414 | RAD23B UV excision repair protein RAD23 homolog B                                       | IPI00008223,IPI00642549                         | 43,153.10  | 68 | 78 | NFVVMVTKPK            | K | A | 1,261.73 |
| 1415 | RPL12 Isoform 1 of 60S ribosomal protein L12                                            | IPI00024933                                     | 17,801.10  | 68 | 83 | QAQIEVPSASALIHK       | R | A | 1,666.97 |
| 1416 | RPL12 Isoform 1 of 60S ribosomal protein L12                                            | IPI00024933                                     | 17,801.10  | 68 | 83 | QAQIEVPSASALIHK       | R | A | 1,666.97 |
| 1417 | ANP32A Acidic leucine-rich nuclear phosphoprotein 32 family member A                    | IPI00025849                                     | 28,568.10  | 68 | 86 | KLELSDNRVSGGLEVLAEK   | K | C | 2,057.12 |
| 1418 | GNPDA1 Glucosamine-6-phosphate isomerase 1                                              | IPI00009305                                     | 32,651.40  | 68 | 79 | TFNMDEYVGLPR          | K | D | 1,457.67 |
| 1419 | PABPC1 Isoform 1 of Polyadenylate-binding protein 1                                     | IPI00008524                                     | 70,653.30  | 68 | 78 | ALDTMNFVVIK           | R | G | 1,266.64 |
| 1420 | PABPC4 Isoform 1 of Polyadenylate-binding protein 4                                     | IPI00012726,IPI00555747,IPI00642904,IPI00642944 | 70,765.80  | 68 | 78 | ALDTMNFVVIK           | R | G | 1,266.64 |
| 1421 | HNRNPD Isoform 1 of Heterogeneous nuclear ribonucleoprotein D0                          | IPI00028888,IPI00220684                         | 38,416.50  | 68 | 85 | IDASKNEEDEGHNSNSPR    | K | H | 1,971.86 |
| 1422 | RPS19 40S ribosomal protein S19                                                         | IPI00215780                                     | 16,042.50  | 68 | 77 | GGAGVGSMTK            | R | I | 864.4245 |
| 1423 | ANP32B Isoform 1 of Acidic leucine-rich nuclear phosphoprotein 32 family member B       | IPI00007423,IPI00759824                         | 28,770.60  | 68 | 75 | KLELSENR              | K | I | 988.5422 |
| 1424 | ARCN1 Putative uncharacterized protein DKFZp686M09245                                   | IPI00298520,IPI00514053                         | 61,581.40  | 68 | 79 | TRIEGLLAAPFK          | R | L | 1,315.77 |

|      |                                                                                                                                               |                                                             |           |    |    |                             |   |   |          |
|------|-----------------------------------------------------------------------------------------------------------------------------------------------|-------------------------------------------------------------|-----------|----|----|-----------------------------|---|---|----------|
| 1425 | EIF5A Isoform 1 of Eukaryotic translation initiation factor 5A-1                                                                              | IPI00411704,IPI00855924                                     | 16,814.70 | 68 | 86 | KYEDICPSTHNMDVPNIKR         | K | N | 2,317.11 |
| 1426 | DDI2 Isoform 3 of Protein DDI1 homolog 2                                                                                                      | IPI00031618,IPI00796836,IPI00845258                         | 46,553.90 | 68 | 75 | DGDVVILR                    | K | Q | 886.4994 |
| 1427 | HN1L Isoform 1 of Hematological and neurological expressed 1-like protein                                                                     | IPI00027397,IPI00909195                                     | 20,045.60 | 68 | 81 | GSGIFDESTPVQTR              | K | Q | 1,493.72 |
| 1428 | HN1L Isoform 1 of Hematological and neurological expressed 1-like protein                                                                     | IPI00027397,IPI00909195                                     | 20,045.60 | 68 | 81 | GSGIFDESTPVQTR              | K | Q | 1,493.72 |
| 1429 | EIF5A Isoform 1 of Eukaryotic translation initiation factor 5A-1                                                                              | IPI00411704,IPI00855924                                     | 16,814.70 | 68 | 85 | KYEDICPSTHNMDVPNIK          | K | R | 2,161.01 |
| 1430 | RPL22 60S ribosomal protein L22                                                                                                               | IPI00219153,IPI00878392                                     | 14,769.30 | 68 | 80 | SKITVTSEVPFSK               | K | R | 1,422.78 |
| 1431 | CCT7 T-complex protein 1 subunit eta                                                                                                          | IPI00018465                                                 | 59,349.80 | 68 | 77 | LLDVVHPAAK                  | K | T | 1,062.63 |
| 1432 | EEF1G cDNA FLJ56389, highly similar to Elongation factor 1-gamma                                                                              | IPI00000875,IPI00747497                                     | 56,132.90 | 68 | 80 | ALIAAQYSGAQVR               | K | V | 1,347.74 |
| 1433 | EEF1G cDNA FLJ56389, highly similar to Elongation factor 1-gamma                                                                              | IPI00000875,IPI00747497                                     | 56,132.90 | 68 | 80 | ALIAAQYSGAQVR               | K | V | 1,347.74 |
| 1434 | LAP3 Isoform 1 of Cytosol aminopeptidase                                                                                                      | IPI00419237,IPI00789806                                     | 56,149.70 | 69 | 79 | ETLNISGPPLK                 | R | A | 1,168.66 |
| 1435 | MED18;LOC100133916 cDNA FLJ51219, highly similar to Homo sapiens mediator of RNA polymerase II transcription, subunit 18 homolog (MFD18) mRNA | IPI00305986                                                 | 24,435.20 | 69 | 78 | GQQASPFVLR                  | K | A | 1,102.60 |
| 1436 | MRFAP1 MORF4 family-associated protein 1                                                                                                      | IPI00020915                                                 | 14,631.80 | 69 | 92 | TQVEASEESALNHLQNPDA<br>AEGR | K | A | 2,523.17 |
| 1437 | SUB1 Activated RNA polymerase II transcriptional coactivator p15                                                                              | IPI00221222                                                 | 14,377.90 | 69 | 75 | MRYVSVR                     | K | D | 926.4876 |
| 1438 | FSCN1 Fascin                                                                                                                                  | IPI00163187,IPI00747810                                     | 54,512.30 | 69 | 82 | YLAADKDGNTVCER              | R | E | 1,611.74 |
| 1439 | GDI1 Rab GDP dissociation inhibitor alpha                                                                                                     | IPI00010154,IPI00910113                                     | 50,566.10 | 69 | 79 | GRDWNVDLIPK                 | R | F | 1,312.70 |
| 1440 | KPNA2;LOC728860 Importin subunit alpha-2                                                                                                      | IPI00002214,IPI00789457                                     | 57,844.50 | 69 | 83 | NNQGTVNWSVDDIVK             | R | G | 1,688.82 |
| 1441 | RPS24 Isoform 1 of 40S ribosomal protein S24                                                                                                  | IPI00029750,IPI00847986,IPI00903204,IPI00915363,IPI00915463 | 15,405.80 | 69 | 83 | TTGFGMIYDSL DYAK            | K | K | 1,697.77 |
| 1442 | AASDHPPT L-aminoadipate-semialdehyde dehydrogenase-phosphopantetheinyl transferase                                                            | IPI00250297                                                 | 35,759.10 | 69 | 83 | KLVAEKLNIPWNHIR             | R | L | 1,831.07 |
| 1443 | GNB2 Guanine nucleotide-binding protein G(I)/G(S)/G(T) subunit beta-2                                                                         | IPI00003348                                                 | 37,313.80 | 69 | 78 | LLVSASQDGK                  | R | L | 1,017.56 |
| 1444 | GNB1 Guanine nucleotide-binding protein G(I)/G(S)/G(T) subunit beta-1                                                                         | IPI00026268                                                 | 37,359.50 | 69 | 78 | LLVSASQDGK                  | R | L | 1,017.56 |
| 1445 | ETF1 Eukaryotic peptide chain release factor subunit 1                                                                                        | IPI00429191                                                 | 49,014.60 | 69 | 81 | LSVLGAITSVQQR               | R | L | 1,371.80 |
| 1446 | POMP Proteasome maturation protein                                                                                                            | IPI00006377                                                 | 15,771.70 | 69 | 78 | NIQGLFAPLK                  | R | L | 1,100.65 |
| 1447 | QK1 Isoform 3 of Protein quaking                                                                                                              | IPI00736672,IPI00759828                                     | 36,908.70 | 69 | 85 | SAELPDAVGPIVQLQEK           | R | L | 1,793.96 |
| 1448 | RPS24 Isoform 1 of 40S ribosomal protein S24                                                                                                  | IPI00029750,IPI00847986,IPI00903204,IPI00915363,IPI00915463 | 15,405.80 | 69 | 84 | TTGFGMIYDSL DYAKK           | K | N | 1,825.87 |
| 1449 | HIST1H4H;HIST2H4A;HIST4H4;HIST1H4F;HIST1H4D;HIST1H4K;HIST1H4C;HIST1H4J;HIST1H4A;HIST1H4I;HIST1H4B;HIST2H4B;HIST1H4E;HIST1H4I Histone H4       | IPI00453473                                                 | 11,349.70 | 69 | 78 | DAVYTEHAK                   | R | R | 1,134.54 |
| 1450 | HIST1H4H;HIST2H4A;HIST4H4;HIST1H4F;HIST1H4D;HIST1H4K;HIST1H4C;HIST1H4J;HIST1H4A;HIST1H4I;HIST1H4B;HIST2H4B;HIST1H4E;HIST1H4I Histone H4       | IPI00453473                                                 | 11,349.70 | 69 | 78 | DAVYTEHAK                   | R | R | 1,134.54 |
| 1451 | HIST1H4H;HIST2H4A;HIST4H4;HIST1H4F;HIST1H4D;HIST1H4K;HIST1H4C;HIST1H4J;HIST1H4A;HIST1H4I;HIST1H4B;HIST2H4B;HIST1H4E;HIST1H4I Histone H4       | IPI00453473                                                 | 11,349.70 | 69 | 78 | DAVYTEHAK                   | R | R | 1,134.54 |
| 1452 | PSMB2 Proteasome subunit beta type-2                                                                                                          | IPI00028006                                                 | 22,819.50 | 69 | 85 | MRNGYELSPTAAANFTR           | K | R | 1,914.91 |
| 1453 | CCT3 chaperonin containing TCP1, subunit 3 isoform b                                                                                          | IPI00290770,IPI00553185                                     | 60,446.30 | 69 | 78 | EIQVQHPAAK                  | R | S | 1,120.61 |
| 1454 | EIF4A1 Eukaryotic initiation factor 4A-I                                                                                                      | IPI00025491,IPI00871852                                     | 46,137.30 | 69 | 82 | GYDVIAQAQSGTGK              | K | T | 1,394.69 |
| 1455 | TRIP13 Isoform 1 of Thyroid receptor-interacting protein 13                                                                                   | IPI00003505                                                 | 48,534.10 | 69 | 81 | NVQSVSIIDTELK               | R | V | 1,445.78 |
| 1456 | KIFC1 Kinesin-like protein KIFC1                                                                                                              | IPI00306400                                                 | 73,730.10 | 69 | 86 | VPSLTTVPQTQGGTTAQK          | R | V | 1,885.00 |
| 1457 | RPL30 60S ribosomal protein L30                                                                                                               | IPI00219156,IPI00872940                                     | 12,766.70 | 69 | 87 | TGVHHYSGNNIELGTACGK         | K | Y | 2,014.94 |
| 1458 | RAB7A Ras-related protein Rab-7a                                                                                                              | IPI00016342                                                 | 23,472.00 | 70 | 79 | FQSLGVAFYR                  | R | G | 1,187.62 |

|      |                                                                          |                                                 |            |    |     |                                                     |             |             |                                  |
|------|--------------------------------------------------------------------------|-------------------------------------------------|------------|----|-----|-----------------------------------------------------|-------------|-------------|----------------------------------|
| 1459 | UBA1 Ubiquitin-like modifier-activating enzyme 1                         | IPI00645078                                     | 117,832.30 | 70 | 81  | LQTSSVLVSGLR                                        | R           | G           | 1,259.73                         |
| 1460 | HNRNPK Isoform 1 of Heterogeneous nuclear ribonucleoprotein K            | IPI00216049,IPI00216746,IPI00807545,IPI00910458 | 50,960.50  | 70 | 86  | TDYNASVSVDPSSGPER                                   | R           | I           | 1,780.80                         |
| 1461 | CGGBP1 CGG triplet repeat-binding protein 1                              | IPI00295585                                     | 18,802.20  | 70 | 80  | RKAEFEEQNVR                                         | K           | K           | 1,405.72                         |
| 1462 | SNRPD3 Small nuclear ribonucleoprotein Sm D3                             | IPI00017964,IPI00878876,IPI00879750             | 13,898.60  | 70 | 78  | FLILPDMLK                                           | R           | N           | 1,089.64                         |
| 1463 | RPL22 60S ribosomal protein L22                                          | IPI00219153,IPI00878392                         | 14,769.30  | 70 | 80  | ITVTSEVPFSK                                         | K           | R           | 1,207.66                         |
| 1464 | HN1 Isoform 1 of Hematological and neurological expressed 1 protein      | IPI00007764,IPI00384857,IPI00917313             | 15,996.60  | 70 | 84  | SSGGREDLESSGLQR                                     | K           | R           | 1,577.75                         |
| 1465 | PDLIM1 PDZ and LIM domain protein 1                                      | IPI00010414                                     | 36,053.30  | 70 | 83  | IKGCTDNLTLTVAR                                      | R           | S           | 1,561.84                         |
| 1466 | LOC284230 similar to mCG7611                                             | IPI00176574,IPI00220344,IPI00742027,IPI00917181 | 12,423.10  | 70 | 78  | LECVEPNCR                                           | R           | S           | 1,176.51                         |
| 1467 | PGM3 cDNA FLJ55543, highly similar to Phosphoacetylglucosamine mutase    | IPI00030116,IPI00643166                         | 62,893.50  | 70 | 77  | MGLLAVLR                                            | R           | S           | 872.5387                         |
| 1468 | EIF4A2 Isoform 1 of Eukaryotic initiation factor 4A-II                   | IPI00328328,IPI00409717                         | 46,385.60  | 70 | 83  | GYDVIAQAQSGTGK                                      | K           | T           | 1,394.69                         |
| 1469 | RPL22 60S ribosomal protein L22                                          | IPI00219153,IPI00878392                         | 14,769.30  | 70 | 81  | ITVTSEVPFSKR                                        | K           | Y           | 1,363.76                         |
| 1470 | CTTN Src substrate cortactin                                             | IPI00029601                                     | 61,567.40  | 71 | 79  | EKELETGPK                                           | K           | A           | 1,030.54                         |
| 1471 | PSMB3 Proteasome subunit beta type-3                                     | IPI00028004                                     | 22,931.60  | 71 | 77  | LNLYELK                                             | R           | E           | 892.5139                         |
| 1472 | PDCD6IP PDCD6IP protein                                                  | IPI00246058                                     | 96,802.50  | 71 | 81  | YYDQICSIEPK                                         | R           | F           | 1,415.65                         |
| 1473 | AURKB Serine/threonine-protein kinase 12                                 | IPI00176642,IPI00796914                         | 39,263.50  | 71 | 85  | HFTIDDFEIGRPLGK                                     | R           | G           | 1,744.90                         |
| 1474 | LSM4 U6 snRNA-associated Sm-like protein LSM4                            | IPI00294955                                     | 15,332.00  | 71 | 86  | IPDEIIDMVKEEVAK                                     | R           | G           | 1,843.97                         |
| 1475 | C1orf122 hypothetical protein LOC127687                                  | IPI00829914                                     | 11,452.80  | 71 | 96  | RRPEPAGGGNVSAKPGAPPQ<br>PAVSAR                      | R<br>R      | G<br>I      | 2,524.35<br>1,554.75             |
| 1476 | WDR82 WD repeat-containing protein 82                                    | IPI00152695                                     | 35,062.40  | 71 | 84  | YTHAANTVVYSSNK                                      | R           | I           | 1,554.75                         |
| 1477 | CGGBP1 CGG triplet repeat-binding protein 1                              | IPI00295585                                     | 18,802.20  | 71 | 80  | KAEFEEQNVR                                          | R           | K           | 1,249.62                         |
| 1478 | PCBP2 poly(rC) binding protein 2 isoform b                               | IPI00012066,IPI00790627                         | 38,204.50  | 71 | 101 | AFAMIIDKLEEDISSSMTNSTA<br>ASRPPVTLR<br>SVEVNFTESLLR | K<br>K<br>K | L<br>M<br>Q | 3,383.68<br>1,393.73<br>1,114.65 |
| 1479 | PDCD10 Programmed cell death protein 10                                  | IPI00298558                                     | 24,684.50  | 71 | 82  | ASRPPVTLR                                           | K           | M           | 1,393.73                         |
| 1480 | TPD52 tumor protein D52 isoform 2                                        | IPI00619951,IPI00619958,IPI00873344,IPI00896474 | 22,459.40  | 71 | 80  | LGINSLQELK                                          | K           | Q           | 1,114.65                         |
| 1481 | TPI1 Isoform 1 of Triosephosphate isomerase                              | IPI00465028                                     | 30,772.80  | 71 | 90  | VPADTEVVCAPPTAYIDFAR                                | K           | Q           | 2,192.07                         |
| 1482 | TPI1 Isoform 1 of Triosephosphate isomerase                              | IPI00465028                                     | 30,772.80  | 71 | 90  | VPADTEVVCAPPTAYIDFAR                                | K           | Q           | 2,192.07                         |
| 1483 | TPI1 Isoform 1 of Triosephosphate isomerase                              | IPI00465028                                     | 30,772.80  | 71 | 90  | VPADTEVVCAPPTAYIDFAR                                | K           | Q           | 2,192.07                         |
| 1484 | PSMB2 Proteasome subunit beta type-2                                     | IPI00028006                                     | 22,819.50  | 71 | 85  | NGYELSPTAAANFTR                                     | R           | R           | 1,611.78                         |
| 1485 | MOSC1 Isoform 1 of MOSC domain-containing protein 1, mitochondrial       | IPI00305258,IPI00828198                         | 37,482.00  | 71 | 85  | GVPVSEAECTAMGLR                                     | K           | S           | 1,592.74                         |
| 1486 | PSMA2 Proteasome subunit alpha type-2                                    | IPI00219622                                     | 25,880.90  | 71 | 84  | HIGLVYSGMGPDYR                                      | K           | V           | 1,580.75                         |
| 1487 | RPS26;LOC728937 40S ribosomal protein S26                                | IPI00655650,IPI00902801                         | 12,997.50  | 71 | 82  | LHYCVSCAIHSK                                        | K           | V           | 1,474.69                         |
| 1488 | WDR82 WD repeat-containing protein 82                                    | IPI00152695                                     | 35,062.40  | 71 | 90  | YTHAANTVVYSSNKIDDTIR                                | R           | Y           | 2,268.13                         |
| 1489 | HMGN4 High mobility group nucleosome-binding domain-containing protein 4 | IPI00220484                                     | 9,521.50   | 72 | 90  | NRDASTLQSQAEGTDAK                                   | K           | -           | 1,976.96                         |
| 1490 | YRDC YrdC domain-containing protein, mitochondrial                       | IPI00384180                                     | 29,310.30  | 72 | 78  | AAVAELR                                             | R           | A           | 729.4253                         |
| 1491 | DHFR Dihydrofolate reductase                                             | IPI00030357,IPI00887771                         | 21,435.30  | 72 | 78  | INLVLSR                                             | R           | E           | 814.5145                         |
| 1492 | METTL7A Methyltransferase-like protein 7A                                | IPI00022300                                     | 28,301.60  | 72 | 86  | LSLLEVGCGTGANFK                                     | K           | F           | 1,565.80                         |
| 1493 | RPL9 60S ribosomal protein L9                                            | IPI00031691                                     | 21,845.70  | 72 | 82  | TICSHVQNMIK                                         | R           | G           | 1,330.66                         |
| 1494 | PPIB Peptidyl-prolyl cis-trans isomerase B                               | IPI00646304                                     | 23,725.20  | 72 | 84  | TVDNFVALATGEK                                       | K           | G           | 1,364.71                         |
| 1495 | EHD1 EH domain-containing protein 1                                      | IPI00017184                                     | 60,611.10  | 72 | 76  | TTFIR                                               | K           | H           | 637.3668                         |
| 1496 | LRRC59 Leucine-rich repeat-containing protein 59                         | IPI00396321                                     | 34,913.40  | 72 | 83  | NKLQQLPADFGR                                        | K           | L           | 1,386.75                         |
| 1497 | ENO1 Isoform alpha-enolase of Alpha-enolase                              | IPI00465248                                     | 47,152.20  | 72 | 81  | TIAPALVSKK                                          | K           | L           | 1,027.65                         |
| 1498 | NCAPH Condensin complex subunit 2                                        | IPI00299507                                     | 82,547.10  | 72 | 83  | VFDLQFSTDSR                                         | R           | L           | 1,411.69                         |
| 1499 | BID Isoform 1 of BH3-interacting domain death agonist                    | IPI00413587,IPI00420084,IPI00871585             | 21,977.30  | 72 | 84  | IEADSESEQEDIIR                                      | R           | N           | 1,504.71                         |
| 1500 | UBA3 NEDD8-activating enzyme E1 catalytic subunit                        | IPI00328154,IPI00375533                         | 51,835.40  | 72 | 86  | VLVIGAGGLGCELLK                                     | K           | N           | 1,498.87                         |
| 1501 | CCDC86 Coiled-coil domain-containing protein 86                          | IPI00012199                                     | 40,218.10  | 72 | 94  | LQQGAGLESPQQPEPGAA<br>SPQR                          | R<br>R      | Q<br>Q      | 2,303.14                         |

|      |                                                                                                          |                                                                                     |           |    |    |                             |   |   |          |
|------|----------------------------------------------------------------------------------------------------------|-------------------------------------------------------------------------------------|-----------|----|----|-----------------------------|---|---|----------|
| 1502 | GPATCH4 Isoform 1 of G patch domain-containing protein 4                                                 | IPI00829835                                                                         | 50,363.50 | 72 | 88 | TAANLVVETGQDGVQIR           | K | S | 1,770.93 |
| 1503 | RUVBL2 RuvB-like 2                                                                                       | IPI00009104                                                                         | 51,140.10 | 72 | 83 | AVLIAGQPPTGK                | R | T | 1,111.65 |
| 1504 | PEA15 Astrocytic phosphoprotein PEA-15                                                                   | IPI00014850,IPI00552198,IPI00643342                                                 | 15,023.20 | 72 | 83 | RPDLLTMVVVDYR               | R | T | 1,493.78 |
| 1505 | FKBP3 FK506-binding protein 3                                                                            | IPI00024157                                                                         | 25,159.40 | 72 | 80 | FKGTESISK                   | R | V | 996.5361 |
| 1506 | YKT6 Synaptobrevin homolog YKT6                                                                          | IPI00008569                                                                         | 22,399.80 | 72 | 88 | NDSLAVVIADNEYPSR            | R | V | 1,819.88 |
| 1507 | KEAP1 Kelch-like ECH-associated protein 1                                                                | IPI00106502,IPI00642319                                                             | 69,646.70 | 72 | 84 | LSQQLCDVTLQVK               | R | Y | 1,531.82 |
| 1508 | RBP1 retinol binding protein 1, cellular isoform a                                                       | IPI00219718                                                                         | 22,292.30 | 73 | 84 | MLVNFNFEEYLR                | K | A | 1,572.74 |
| 1509 | XRCC4 Isoform 1 of DNA repair protein XRCC4                                                              | IPI00007672,IPI00019678,IPI00401064                                                 | 38,269.70 | 73 | 90 | ALLSGAGPADVYTFNFSK          | K | E | 1,857.94 |
| 1510 | GD12 cDNA FLJ60299, highly similar to Rab GDP dissociation inhibitor beta                                | IPI00031461                                                                         | 51,138.50 | 73 | 83 | GRDWNVDLIPK                 | R | F | 1,312.70 |
| 1511 | DDX56 Probable ATP-dependent RNA helicase DDX56                                                          | IPI00302281                                                                         | 61,573.50 | 73 | 84 | KATGPVVEQAVR                | R | G | 1,254.72 |
| 1512 | RAD21 Double-strand-break repair protein rad21 homolog                                                   | IPI00006715                                                                         | 71,673.60 | 73 | 84 | YLLADCNEAFIK                | K | I | 1,456.71 |
| 1513 | CAPZB Isoform 2 of F-actin-capping protein subunit beta                                                  | IPI00642256                                                                         | 30,611.70 | 73 | 92 | SPWSNKYDPPLEDGAMPSA<br>R    | R | L | 2,218.02 |
| 1514 | AK2 Isoform 1 of Adenylate kinase isoenzyme 2, mitochondrial                                             | IPI00215901                                                                         | 26,461.00 | 73 | 85 | LVSDEMVVELIEK               | K | N | 1,519.79 |
| 1515 | DHRS7 Isoform 1 of Dehydrogenase/reductase SDR family member 7                                           | IPI00006957,IPI00339238                                                             | 38,281.90 | 73 | 82 | LGVSLVLSAR                  | K | R | 1,014.63 |
| 1516 | C1orf123 UPF0587 protein C1orf123                                                                        | IPI00016605                                                                         | 18,030.70 | 73 | 95 | ENSIEILSSTIKPYNAEDNENF<br>K | R | T | 2,655.28 |
| 1517 | CORO1C Coronin-1C_i3 protein                                                                             | IPI00867509                                                                         | 58,930.80 | 73 | 81 | NDQCYDDIR                   | K | V | 1,198.48 |
| 1518 | HNRNPM Isoform 1 of Heterogeneous nuclear ribonucleoprotein M                                            | IPI00171903,IPI00383296                                                             | 77,499.30 | 73 | 83 | AFITNIPFDVK                 | R | W | 1,264.69 |
| 1519 | C4orf43 UPF0534 protein C4orf43                                                                          | IPI00019962                                                                         | 23,847.30 | 73 | 80 | DACELIER                    | K | Y | 1,005.47 |
| 1520 | SLC25A5 ADP/ATP translocase 2                                                                            | IPI00007188                                                                         | 32,878.50 | 73 | 80 | GNLANVIR                    | R | Y | 856.4999 |
| 1521 | SLC25A6 ADP/ATP translocase 3                                                                            | IPI00291467                                                                         | 32,849.10 | 73 | 80 | GNLANVIR                    | R | Y | 856.4999 |
| 1522 | GNB2L1 38 kDa protein                                                                                    | IPI00641950,IPI00848226                                                             | 37,740.10 | 74 | 86 | LTRDETNYGIPQR               | K | A | 1,562.79 |
| 1523 | SNRNP Isoform SM-B' of Small nuclear ribonucleoprotein-associated proteins B and B'                      | IPI00027285,IPI00220360,IPI00329512,IPI00395674,IPI00785142,IPI00844420,IPI00877103 | 24,592.60 | 74 | 88 | GENLVSMTEGPPPK              | R | D | 1,570.78 |
| 1524 | HIST2H3A;HIST2H3D;HIST2H3C Histone H3.2                                                                  | IPI00171611,IPI00219038,IPI00465070,IPI00909530                                     | 15,370.70 | 74 | 84 | EIAQDFKTDLR                 | R | F | 1,335.69 |
| 1525 | NR2C2AP cDNA FLJ60181, highly similar to Homo sapiens TR4 orphan receptor associated protein TRA16. mRNA | IPI00329107,IPI00791711                                                             | 19,380.50 | 74 | 88 | RGCLEGSQGTQALHK             | R | I | 1,641.81 |
| 1526 | HSPA4L Heat shock 70 kDa protein 4L                                                                      | IPI00295485,IPI00828021                                                             | 94,470.40 | 74 | 84 | SFDDPIVQTER                 | R | I | 1,306.63 |
| 1527 | VPS29 Isoform 1 of Vacuolar protein sorting-associated protein 29                                        | IPI00170796,IPI00184284,IPI00798102                                                 | 20,488.10 | 74 | 81 | VVTVGQFK                    | K | I | 877.5142 |
| 1528 | VPS29 Isoform 1 of Vacuolar protein sorting-associated protein 29                                        | IPI00170796,IPI00184284,IPI00798102                                                 | 20,488.10 | 74 | 81 | VVTVGQFK                    | K | I | 877.5142 |
| 1529 | RPL23 60S ribosomal protein L23                                                                          | IPI00010153,IPI00795408                                                             | 14,847.90 | 74 | 83 | KKVHPAVVIR                  | R | Q | 1,146.75 |
| 1530 | UCHL5 Isoform 2 of Ubiquitin carboxyl-terminal hydrolase isozyme L5                                      | IPI00219512,IPI00219513,IPI00299313,IPI00549820,IPI00549849,IPI00641843,IPI00642374 | 36,061.70 | 74 | 81 | LDTIFFAK                    | R | Q | 954.5296 |
| 1531 | RPL7A 60S ribosomal protein L7a                                                                          | IPI00299573                                                                         | 29,978.30 | 74 | 89 | LKVPPAINQFTQALDR            | R | Q | 1,811.02 |
| 1532 | ATP5O ATP synthase subunit O, mitochondrial                                                              | IPI00007611                                                                         | 23,259.40 | 74 | 84 | VAASVLNPPYVK                | K | R | 1,160.67 |
| 1533 | HIST2H3A;HIST2H3D;HIST2H3C Histone H3.2                                                                  | IPI00171611,IPI00219038,IPI00465070,IPI00909530                                     | 15,370.70 | 74 | 80 | EIAQDFK                     | R | T | 850.4306 |
| 1534 | SNRNP Isoform SM-B' of Small nuclear ribonucleoprotein-associated proteins B and B'                      | IPI00027285,IPI00220360,IPI00329512,IPI00395674,IPI00785142,IPI00844420,IPI00877103 | 24,592.60 | 74 | 94 | GENLVSMTEGPPPKDTGIAR        | R | V | 2,184.10 |
| 1535 | PDIA3 Protein disulfide-isomerase A3                                                                     | IPI00025252                                                                         | 56,766.60 | 74 | 82 | LKGIVPLAK                   | R | V | 938.6399 |
| 1536 | HNRNPC Isoform C1 of Heterogeneous nuclear ribonucleoproteins C1/C2                                      | IPI00216592,IPI00477313,IPI00909232                                                 | 32,320.00 | 74 | 89 | MIAGQVLDINLAAEPK            | R | V | 1,682.91 |
| 1537 | ATP5A1 ATP synthase subunit alpha, mitochondrial                                                         | IPI00440493                                                                         | 59,734.10 | 74 | 83 | VLSIGDGIAR                  | R | V | 1,000.58 |
| 1538 | GSTM3 Glutathione S-transferase Mu 3                                                                     | IPI00246975                                                                         | 26,543.10 | 74 | 82 | ITQSNAILR                   | K | Y | 1,015.59 |
| 1539 | LASP1 Isoform 1 of LIM and SH3 domain protein 1                                                          | IPI00000861,IPI00386803,IPI00883946                                                 | 29,698.80 | 74 | 85 | LKQQSELQSQVR                | R | Y | 1,443.79 |
| 1540 | RPL27 60S ribosomal protein L27                                                                          | IPI00219155                                                                         | 15,780.40 | 74 | 84 | VYNYNHLMPTR                 | K | Y | 1,423.68 |
| 1541 | KIAA0101 PCNA-associated factor                                                                          | IPI00014147,IPI00790491,IPI00792465                                                 | 11,968.50 | 75 | 93 | DSEKENQIPEEAGSSGLGK         | K | A | 1,974.93 |

|      |                                                                                     |                                                             |            |    |     |                             |   |   |          |
|------|-------------------------------------------------------------------------------------|-------------------------------------------------------------|------------|----|-----|-----------------------------|---|---|----------|
| 1542 | SRP14 Signal recognition particle 14 kDa protein                                    | IPI00293434                                                 | 14,552.60  | 75 | 88  | EVNKFQMAYSNLLR              | K | A | 1,712.88 |
| 1543 | EIF2B1 Translation initiation factor eIF-2B subunit alpha                           | IPI00221300                                                 | 33,695.20  | 75 | 88  | FISLASLEYSYDYSK             | R | C | 1,622.79 |
| 1544 | YWHAQ 14-3-3 protein theta                                                          | IPI0018146                                                  | 27,747.40  | 75 | 83  | KLQLIKDYR                   | K | E | 1,176.71 |
| 1545 | WDR36 WD repeat-containing protein 36                                               | IPI00169325                                                 | 105,307.90 | 75 | 88  | ALGLFSNDIPHVVR              | R | F | 1,537.85 |
| 1546 | C16orf14 Isoform 1 of Uncharacterized protein C16orf14                              | IPI00042604                                                 | 17,809.50  | 75 | 99  | RAPSTSPSFEGTQETYVAHE ENVR   | R | F | 2,793.31 |
| 1547 | RAB11B Ras-related protein Rab-11B                                                  | IPI00020436                                                 | 24,471.00  | 75 | 82  | AITSAYYR                    | R | G | 944.4835 |
| 1548 | PPP2CA Serine/threonine-protein phosphatase 2A catalytic subunit alpha isoform      | IPI00008380                                                 | 35,576.50  | 75 | 89  | SPDTNYLFMGDYVDR             | K | G | 1,808.78 |
| 1549 | CACYBP Isoform 1 of Calcyclin-binding protein                                       | IPI00395627                                                 | 26,192.30  | 75 | 88  | ISNYGWDQSDKFKV              | K | I | 1,686.81 |
| 1550 | SSB Lupus La protein                                                                | IPI00009032,IPI00916802                                     | 46,821.00  | 75 | 88  | SKAELMEISEDKTK              | K | I | 1,608.82 |
| 1551 | SH3GLB1 Isoform 1 of Endophilin-B1                                                  | IPI00006558                                                 | 40,780.00  | 75 | 85  | IEEFVYEKLDLR                | R | K | 1,440.74 |
| 1552 | AASDHPPPT L-aminoadipate-semialdehyde dehydrogenase-phosphopantetheinyl transferase | IPI00250297                                                 | 35,759.10  | 75 | 83  | LNIPWNHIR                   | K | L | 1,162.65 |
| 1553 | NUP37 Nucleoporin Nup37                                                             | IPI00171665                                                 | 36,689.20  | 75 | 85  | VDGIAWSPETR                 | R | L | 1,230.61 |
| 1554 | RPL23 60S ribosomal protein L23                                                     | IPI00010153,IPI00795408                                     | 14,847.90  | 75 | 83  | KVHPAVVIR                   | K | Q | 1,018.65 |
| 1555 | RPL23 60S ribosomal protein L23                                                     | IPI00010153,IPI00795408                                     | 14,847.90  | 75 | 83  | KVHPAVVIR                   | K | Q | 1,018.65 |
| 1556 | UCHL3 Ubiquitin carboxyl-terminal hydrolase isozyme L3                              | IPI00011250                                                 | 26,164.80  | 75 | 88  | SQGQDVTSSVYFMK              | K | Q | 1,576.73 |
| 1557 | RPL13 60S ribosomal protein L13                                                     | IPI00465361                                                 | 24,244.20  | 75 | 82  | GFSLEELR                    | R | V | 950.4942 |
| 1558 | PDAP1 28 kDa heat- and acid-stable phosphoprotein                                   | IPI00013297                                                 | 20,612.80  | 75 | 88  | KGVEGLIDIENPNR              | R | V | 1,553.83 |
| 1559 | CMPK1 cytidine monophosphate (UMP-CMP) kinase 1, cytosolic isoform a                | IPI00219953                                                 | 25,837.80  | 75 | 87  | KNPDSQYGELIEK               | R | Y | 1,520.76 |
| 1560 | EHD4 EH domain-containing protein 4                                                 | IPI00005578                                                 | 61,159.60  | 75 | 79  | TTFIR                       | K | Y | 637.3668 |
| 1561 | RPL18A 60S ribosomal protein L18a                                                   | IPI00026202                                                 | 20,744.60  | 75 | 83  | VKNFGIWL                    | R | Y | 1,132.66 |
| 1562 | GSTP1 Glutathione S-transferase P                                                   | IPI00219757                                                 | 23,338.70  | 76 | 101 | TLGLYGKDKQEAALVDMVND GVEDLR | R | C | 2,865.39 |
| 1563 | ANP32A Acidic leucine-rich nuclear phosphoprotein 32 family member A                | IPI00025849                                                 | 28,568.10  | 76 | 86  | VSGGLEVLAEK                 | R | C | 1,101.62 |
| 1564 | ANP32A Acidic leucine-rich nuclear phosphoprotein 32 family member A                | IPI00025849                                                 | 28,568.10  | 76 | 86  | VSGGLEVLAEK                 | R | C | 1,101.62 |
| 1565 | CALM1;CALM3;CALM2 Calmodulin                                                        | IPI00075248,IPI00386621,IPI00794543,IPI00916768             | 16,820.00  | 76 | 87  | KMKDTSDEEEIR                | R | E | 1,496.69 |
| 1566 | YWHAQ 14-3-3 protein theta                                                          | IPI00018146                                                 | 27,747.40  | 76 | 83  | LQLIKDYR                    | K | E | 1,048.62 |
| 1567 | SPEN Mx2-interacting protein                                                        | IPI00045914                                                 | 402,226.70 | 76 | 89  | TDYNEPGTIPSAAR              | R | G | 1,491.71 |
| 1568 | CHMP1A Isoform 1 of Charged multivesicular body protein 1a                          | IPI00382452                                                 | 21,684.50  | 76 | 83  | VQTAVTMK                    | K | G | 877.4812 |
| 1569 | ANP32A Acidic leucine-rich nuclear phosphoprotein 32 family member A                | IPI00025849                                                 | 28,568.10  | 76 | 99  | VSGGLEVLAEKCPNLTHLNL GNK    | R | I | 2,550.33 |
| 1570 | PHGDH D-3-phosphoglycerate dehydrogenase                                            | IPI00011200                                                 | 56,632.60  | 76 | 90  | AGTGVNDVDLEAATR             | R | K | 1,488.73 |
| 1571 | NONO Non-POU domain-containing octamer-binding protein                              | IPI00304596                                                 | 54,213.60  | 76 | 91  | LFVGNLPPDITEEEMR            | R | K | 1,859.92 |
| 1572 | ANP32B Isoform 1 of Acidic leucine-rich nuclear phosphoprotein 32 family member B   | IPI00007423,IPI00759824                                     | 28,770.60  | 76 | 86  | IFGGLDMLAEK                 | R | L | 1,209.62 |
| 1573 | PIN4 protein (peptidyl-prolyl cis/trans isomerase) NIMA-interacting, 4              | IPI00006658                                                 | 16,590.50  | 76 | 82  | IMEAMEK                     | K | L | 867.3952 |
| 1574 | NONO Non-POU domain-containing octamer-binding protein                              | IPI00304596                                                 | 54,213.60  | 76 | 92  | LFVGNLPPDITEEEMRK           | R | L | 1,988.02 |
| 1575 | KIAA0841 Isoform 1 of Uncharacterized protein KIAA0841                              | IPI00014220,IPI00440233                                     | 71,665.00  | 76 | 86  | RKLELEAAVTR                 | R | L | 1,285.76 |
| 1576 | LASS2 LAG1 longevity assurance homolog 2                                            | IPI00305304,IPI00641012,IPI00641435,IPI00642091,IPI00642378 | 44,860.90  | 76 | 93  | LRAPPNATLEHFYLTSGK          | R | Q | 2,015.07 |
| 1577 | SFRS3 Splicing factor, arginine/serine-rich 3                                       | IPI00010204,IPI00843996                                     | 19,312.00  | 76 | 85  | VRVELSNGEK                  | R | R | 1,130.62 |
| 1578 | SFRS3 Splicing factor, arginine/serine-rich 3                                       | IPI00010204,IPI00843996                                     | 19,312.00  | 76 | 86  | VRVELSNGEKR                 | R | S | 1,286.72 |
| 1579 | PFN1 Profilin-1                                                                     | IPI00216691                                                 | 15,036.30  | 76 | 89  | DSLQLQDGEFSMDLR             | R | T | 1,641.74 |
| 1580 | PSIP1 Isoform 1 of PC4 and SFRS1-interacting protein                                | IPI00028122                                                 | 60,085.90  | 76 | 89  | GFNEGLWEIDNNPK              | K | V | 1,632.77 |
| 1581 | PDAP1 28 kDa heat- and acid-stable phosphoprotein                                   | IPI00013297                                                 | 20,612.80  | 76 | 88  | GVEGLIDIENPNR               | K | V | 1,425.73 |

|      |                                                                    |                                     |            |    |     |                                  |   |   |          |
|------|--------------------------------------------------------------------|-------------------------------------|------------|----|-----|----------------------------------|---|---|----------|
| 1582 | CSE1L Isoform 1 of Exportin-2                                      | IPI00022744,IPI00219994             | 110,403.90 | 76 | 89  | IVEDEPNKICEADR                   | R | V | 1,687.80 |
| 1583 | GSTP1 Glutathione S-transferase P                                  | IPI00219757                         | 23,338.70  | 76 | 103 | TLGLYGKDQQEAALVDMVND<br>GVEDLRCK | R | Y | 3,153.52 |
| 1584 | HMG2 Non-histone chromosomal protein HMG-17                        | IPI00217950                         | 9,375.10   | 77 | 90  | TDQAQKAEGAGDAK                   | K | - | 1,389.66 |
| 1585 | GNB2L1 38 kDa protein                                              | IPI00641950,IPI00848226             | 37,740.10  | 77 | 86  | DETNYGIPQR                       | R | A | 1,192.56 |
| 1586 | HSPB11 Heat shock protein beta-11                                  | IPI00098827,IPI00333618             | 16,279.20  | 77 | 91  | STSKEPVDFEQWIEK                  | K | D | 1,822.89 |
| 1587 | CHAC2 Cation transport regulator-like protein 2                    | IPI00103047                         | 20,857.10  | 77 | 82  | AYLDFR                           | K | E | 784.3988 |
| 1588 | TSN Translin                                                       | IPI00018768,IPI00917623             | 26,165.40  | 77 | 86  | TKFPAEQYYR                       | K | F | 1,302.65 |
| 1589 | HSPA1A;HSPA1B Heat shock 70 kDa protein 1                          | IPI00304925                         | 70,036.00  | 77 | 88  | KFGDPVVQSDMK                     | R | H | 1,366.67 |
| 1590 | - cDNA FLJ54408, highly similar to Heat shock 70 kDa protein 1     | IPI00911039                         | 63,907.90  | 77 | 88  | KFGDPVVQSDMK                     | R | H | 1,366.67 |
| 1591 | HSPA8 Isoform 1 of Heat shock cognate 71 kDa protein               | IPI00003865                         | 70,881.80  | 77 | 88  | RFDDAVVQSDMK                     | R | H | 1,410.67 |
| 1592 | PPIA Peptidyl-prolyl cis-trans isomerase A                         | IPI00419585,IPI00887678             | 17,994.90  | 77 | 91  | SIYGKFEFENFILK                   | K | H | 1,831.91 |
| 1593 | LDHA Isoform 1 of L-lactate dehydrogenase A chain                  | IPI00217966                         | 36,671.20  | 77 | 90  | IVSGKDYNVTANSK                   | K | L | 1,495.78 |
| 1594 | C9orf23 Alba-like protein C9orf23                                  | IPI00166873                         | 17,613.40  | 77 | 86  | RVPGLHLQTK                       | R | L | 1,148.69 |
| 1595 | UBL4A Ubiquitin-like protein 4A                                    | IPI00005658                         | 17,758.90  | 77 | 86  | VLLEEGEAQR                       | K | L | 1,143.60 |
| 1596 | HSD17B12 Estradiol 17-beta-dehydrogenase 12                        | IPI00007676                         | 34,307.40  | 77 | 82  | VVLISR                           | K | S | 686.4559 |
| 1597 | HSPA9 Stress-70 protein, mitochondrial                             | IPI00007765                         | 73,663.30  | 77 | 85  | VLENAEGAR                        | K | T | 958.4952 |
| 1598 | RPS3 40S ribosomal protein S3                                      | IPI00011253                         | 26,670.50  | 77 | 90  | FGFPEGSVELYAEK                   | R | V | 1,572.76 |
| 1599 | HNRNPA3 Isoform 1 of Heterogeneous nuclear ribonucleoprotein A3    | IPI00419373                         | 39,577.10  | 77 | 99  | GFGFVTYSCVEEVAAMCAR<br>PHK       | R | V | 2,647.17 |
| 1600 | HNRNPA3 Isoform 1 of Heterogeneous nuclear ribonucleoprotein A3    | IPI00419373                         | 39,577.10  | 77 | 99  | GFGFVTYSCVEEVAAMCAR<br>PHK       | R | V | 2,647.17 |
| 1601 | RUVBL1 Isoform 1 of RuvB-like 1                                    | IPI00021187                         | 50,211.40  | 77 | 90  | TALALAIQELGSK                    | K | V | 1,385.80 |
| 1602 | RPL18A 60S ribosomal protein L18a                                  | IPI00026202                         | 20,744.60  | 77 | 83  | NFGIWLRL                         | K | Y | 905.4992 |
| 1603 | STIP1 Stress-induced-phosphoprotein 1                              | IPI00013894,IPI00871856             | 62,624.10  | 78 | 87  | KAAALEFLNR                       | R | F | 1,132.65 |
| 1604 | TUBB2C Tubulin beta-2C chain                                       | IPI00007752                         | 49,812.70  | 78 | 103 | SGPFGQIFRPDNFVFGQSGA<br>GNNWAK   | R | G | 2,798.34 |
| 1605 | TUBB2C Tubulin beta-2C chain                                       | IPI00007752                         | 49,812.70  | 78 | 103 | SGPFGQIFRPDNFVFGQSGA<br>GNNWAK   | R | G | 2,798.34 |
| 1606 | TUBB Tubulin beta chain                                            | IPI00011654                         | 49,652.60  | 78 | 103 | SGPFGQIFRPDNFVFGQSGA<br>GNNWAK   | R | G | 2,798.34 |
| 1607 | TUBB Tubulin beta chain                                            | IPI00011654                         | 49,652.60  | 78 | 103 | SGPFGQIFRPDNFVFGQSGA<br>GNNWAK   | R | G | 2,798.34 |
| 1608 | TUBB2A Tubulin beta-2A chain                                       | IPI00013475,IPI00031370             | 49,889.10  | 78 | 103 | SGPFGQIFRPDNFVFGQSGA<br>GNNWAK   | R | G | 2,798.34 |
| 1609 | TUBB2A Tubulin beta-2A chain                                       | IPI00013475,IPI00031370             | 49,889.10  | 78 | 103 | SGPFGQIFRPDNFVFGQSGA<br>GNNWAK   | R | G | 2,798.34 |
| 1610 | SEPT2 Septin-2                                                     | IPI00014177,IPI00871851,IPI00894340 | 41,470.10  | 78 | 91  | TVQIEASTVEIEER                   | R | G | 1,603.82 |
| 1611 | HSPA1A;HSPA1B Heat shock 70 kDa protein 1                          | IPI00304925                         | 70,036.00  | 78 | 88  | FGDPVVQSDMK                      | K | H | 1,222.58 |
| 1612 | - cDNA FLJ54408, highly similar to Heat shock 70 kDa protein 1     | IPI00911039                         | 63,907.90  | 78 | 88  | FGDPVVQSDMK                      | K | H | 1,222.58 |
| 1613 | LDHB L-lactate dehydrogenase B chain                               | IPI00219217                         | 36,620.60  | 78 | 91  | IVADKDYSVTANSK                   | K | I | 1,510.77 |
| 1614 | LDHB L-lactate dehydrogenase B chain                               | IPI00219217                         | 36,620.60  | 78 | 91  | IVADKDYSVTANSK                   | K | I | 1,510.77 |
| 1615 | FDFT1 Squalene synthetase                                          | IPI00020944,IPI00908715             | 48,098.40  | 78 | 92  | ALDTLEDDMTISVEK                  | R | K | 1,695.80 |
| 1616 | SELS Selenoprotein S                                               | IPI00020468,IPI00793181,IPI00916735 | 21,098.40  | 78 | 86  | RQEALAAAR                        | K | L | 985.5537 |
| 1617 | CPSF2 Cleavage and polyadenylation specificity factor subunit 2    | IPI00419531,IPI00902580             | 88,471.50  | 78 | 92  | LGLNCAIYATIPVYK                  | K | M | 1,695.91 |
| 1618 | RDBP cDNA FLJ56180, highly similar to Negative elongation factor E | IPI00000858                         | 43,907.90  | 78 | 89  | SGAISAIKAETK                     | K | N | 1,175.66 |
| 1619 | CMAS Isoform 1 of N-acylneuraminase cytidyltransferase             | IPI00303158                         | 48,361.60  | 78 | 102 | AALDSGAFQSVVSTDHDEI<br>ENVAK     | R | Q | 2,689.27 |
| 1620 | KIF2C Isoform 1 of Kinesin-like protein KIF2C                      | IPI00290435,IPI00645758             | 81,296.50  | 78 | 90  | DNLPLQENVTIQK                    | K | Q | 1,511.81 |
| 1621 | UHRF1 ubiquitin-like with PHD and ring finger domains 1 isoform 2  | IPI00797279,IPI00797945             | 91,082.30  | 78 | 87  | LNDTIQLLVR                       | R | Q | 1,184.70 |



|      |                                                                                                                                         |                                                             |           |    |     |                              |   |   |          |
|------|-----------------------------------------------------------------------------------------------------------------------------------------|-------------------------------------------------------------|-----------|----|-----|------------------------------|---|---|----------|
| 1622 | RBMX Heterogeneous nuclear ribonucleoprotein G                                                                                          | IPI00304692                                                 | 42,315.70 | 78 | 93  | AIKVEQATKPSFESGR             | K | R | 1,747.93 |
| 1623 | RBMX Heterogeneous nuclear ribonucleoprotein G                                                                                          | IPI00304692                                                 | 42,315.70 | 78 | 93  | AIKVEQATKPSFESGR             | K | R | 1,747.93 |
| 1624 | RBMX Heterogeneous nuclear ribonucleoprotein G                                                                                          | IPI00304692                                                 | 42,315.70 | 78 | 93  | AIKVEQATKPSFESGR             | K | R | 1,747.93 |
| 1625 | RBMX Heterogeneous nuclear ribonucleoprotein G                                                                                          | IPI00304692                                                 | 42,315.70 | 78 | 93  | AIKVEQATKPSFESGR             | K | R | 1,747.93 |
| 1626 | RAB2B Ras-related protein Rab-2B                                                                                                        | IPI00102896                                                 | 24,197.10 | 78 | 90  | GAAGALLYVDITR                | R | R | 1,319.73 |
| 1627 | SFRS3 Splicing factor, arginine/serine-rich 3                                                                                           | IPI00010204,IPI00843996                                     | 19,312.00 | 78 | 86  | VELSNGEKR                    | R | S | 1,031.55 |
| 1628 | RPS8 40S ribosomal protein S8                                                                                                           | IPI00216587,IPI00872430                                     | 24,188.40 | 78 | 92  | IIDVVYNASNNELVR              | R | T | 1,718.91 |
| 1629 | RPS8 40S ribosomal protein S8                                                                                                           | IPI00216587,IPI00872430                                     | 24,188.40 | 78 | 92  | IIDVVYNASNNELVR              | R | T | 1,718.91 |
| 1630 | RCC2 Protein RCC2                                                                                                                       | IPI00465044                                                 | 56,066.80 | 78 | 94  | AGGAAVVITEPEHTKER            | K | V | 1,764.92 |
| 1631 | SRP14 Signal recognition particle 14 kDa protein                                                                                        | IPI00293434                                                 | 14,552.60 | 79 | 88  | FQMAYSNLLR                   | K | A | 1,242.63 |
| 1632 | BAX Isoform Epsilon of Apoptosis regulator BAX                                                                                          | IPI00071059,IPI00443773,IPI00444945,IPI00845474             | 18,111.40 | 79 | 89  | MIAAVDTDSPR                  | R | E | 1,175.57 |
| 1633 | DDX27 Probable ATP-dependent RNA helicase DDX27                                                                                         | IPI00293078                                                 | 89,820.10 | 79 | 91  | SADFNPDFVFTEK                | R | E | 1,516.70 |
| 1634 | STIP1 Stress-induced-phosphoprotein 1                                                                                                   | IPI00013894,IPI00871856                                     | 62,624.10 | 79 | 87  | AAALEFLNR                    | K | F | 1,004.55 |
| 1635 | ACOT7 Isoform 1 of Cytosolic acyl coenzyme A thioester hydrolase                                                                        | IPI00010415,IPI00219451,IPI00219452,IPI00395748             | 41,777.00 | 79 | 90  | MIEEAGAIISTR                 | K | H | 1,306.67 |
| 1636 | SEC11A Signal peptidase complex catalytic subunit SEC11A                                                                                | IPI00104128,IPI00873253,IPI00873608                         | 20,607.80 | 79 | 86  | VGEIVVFR                     | R | I | 918.5407 |
| 1637 | LMNA Isoform A of Lamin-A/C                                                                                                             | IPI00021405                                                 | 74,122.60 | 79 | 89  | AAYEALGDAR                   | K | K | 1,165.55 |
| 1638 | RPL23A;hCG_16001 60S ribosomal protein L23a                                                                                             | IPI00021266                                                 | 17,678.20 | 79 | 88  | FPLTTESAMK                   | K | K | 1,140.56 |
| 1639 | FAR1 Fatty acyl-CoA reductase 1                                                                                                         | IPI00478838                                                 | 59,340.20 | 79 | 90  | IIAINSELTQPK                 | K | L | 1,326.76 |
| 1640 | PTGES3 cDNA FLJ50819, highly similar to Prostaglandin E synthase 3                                                                      | IPI00790462                                                 | 14,940.90 | 79 | 88  | KGESGQSWPR                   | R | L | 1,131.55 |
| 1641 | PTGES3 cDNA FLJ50819, highly similar to Prostaglandin E synthase 3                                                                      | IPI00790462                                                 | 14,940.90 | 79 | 88  | KGESGQSWPR                   | R | L | 1,131.55 |
| 1642 | RPS18;LOC100130553 40S ribosomal protein S18                                                                                            | IPI00013296                                                 | 17,701.30 | 79 | 86  | IPDWFLNR                     | K | Q | 1,060.56 |
| 1643 | THOC4 THO complex subunit 4                                                                                                             | IPI00328840                                                 | 27,540.50 | 79 | 88  | NRPAYSRPK                    | R | Q | 1,185.65 |
| 1644 | UCHL1 Ubiquitin carboxyl-terminal hydrolase isozyme L1                                                                                  | IPI00018352                                                 | 24,806.30 | 79 | 83  | VYFMK                        | K | Q | 703.3484 |
| 1645 | DHFR Dihydrofolate reductase                                                                                                            | IPI00030357,IPI00887771                                     | 21,435.30 | 79 | 92  | ELKEPPQGAHFLSR               | R | S | 1,608.85 |
| 1646 | CDK6 Cell division protein kinase 6                                                                                                     | IPI00023529                                                 | 36,920.80 | 79 | 87  | LFDVCTVSR                    | R | T | 1,096.55 |
| 1647 | CALM1;CALM3;CALM2 Calmodulin                                                                                                            | IPI00075248,IPI00386621,IPI00794543,IPI00916768             | 16,820.00 | 79 | 91  | DTDSEEEIREAFR                | K | V | 1,596.71 |
| 1648 | RPL10 60S ribosomal protein L10                                                                                                         | IPI00554723,IPI00646899,IPI00853161                         | 24,586.60 | 79 | 88  | SCGKDGFHIR                   | K | V | 1,176.56 |
| 1649 | RPL18 60S ribosomal protein L18                                                                                                         | IPI00215719                                                 | 21,617.20 | 79 | 91  | TAVVVGITDDVR                 | K | V | 1,345.73 |
| 1650 | RBM4 Isoform 1 of RNA-binding protein 4                                                                                                 | IPI00003704                                                 | 40,296.20 | 80 | 92  | LHVGNISPTCTNK                | K | E | 1,440.73 |
| 1651 | NUDT1 Isoform p26 of 7,8-dihydro-8-oxoguanine triphosphatase                                                                            | IPI00004392,IPI00396056,IPI00644344,IPI00759462,IPI00759578 | 22,533.80 | 80 | 92  | VQEGETIEDGARR                | K | E | 1,459.71 |
| 1652 | H2AFY H2A histone family, member Y isoform 2                                                                                            | IPI00059366,IPI00304171,IPI00744148                         | 39,472.70 | 80 | 96  | HILLAVANDEELNQLLK            | R | G | 1,933.08 |
| 1653 | BTF3 Isoform 1 of Transcription factor BTF3                                                                                             | IPI00221035                                                 | 22,150.30 | 80 | 93  | TATADDKKLQFSLK               | R | K | 1,565.85 |
| 1654 | PTGES3 cDNA FLJ50819, highly similar to Prostaglandin E synthase 3                                                                      | IPI00790462                                                 | 14,940.90 | 80 | 88  | GESGQSWPR                    | K | L | 1,003.46 |
| 1655 | RAB1B Ras-related protein Rab-1B                                                                                                        | IPI00008964,IPI00896425                                     | 22,154.00 | 80 | 100 | GAHGIIVVYDVTQESYANVK         | R | Q | 2,278.14 |
| 1656 | HIST1H4H;HIST2H4A;HIST4H4;HIST1H4F;HIST1H4D;HIST1H4K;HIST1H4C;HIST1H4J;HIST1H4A;HIST1H4I;HIST1H4B;HIST2H4B;HIST1H4E;HIST1H4I Histone H4 | IPI00453473                                                 | 11,349.70 | 80 | 93  | KTVTAMDVVYALKR               | R | Q | 1,610.89 |
| 1657 | HIST1H4H;HIST2H4A;HIST4H4;HIST1H4F;HIST1H4D;HIST1H4K;HIST1H4C;HIST1H4J;HIST1H4A;HIST1H4I;HIST1H4B;HIST2H4B;HIST1H4E;HIST1H4I Histone H4 | IPI00453473                                                 | 11,349.70 | 80 | 93  | KTVTAMDVVYALKR               | R | Q | 1,610.89 |
| 1658 | LMNB1 Lamin-B1                                                                                                                          | IPI00217975                                                 | 66,391.60 | 80 | 90  | ALYETELADAR                  | K | R | 1,251.62 |
| 1659 | RAB18 Ras-related protein Rab-18                                                                                                        | IPI00014577                                                 | 22,959.50 | 80 | 92  | GAQGVLVYDVTR                 | R | R | 1,390.77 |
| 1660 | SERPINB6 Putative uncharacterized protein DKFP686I04222                                                                                 | IPI00413451,IPI00749398                                     | 46,353.40 | 80 | 94  | GNTAAQMAQILSFNK              | K | S | 1,609.80 |
| 1661 | CHMP5 Charged multivesicular body protein 5                                                                                             | IPI00100796                                                 | 24,553.80 | 80 | 103 | DNLAQQSFNMEQANYTIQSL<br>KDTK | R | T | 2,803.32 |

|      |                                                                                                                                         |                                                 |           |    |     |                               |   |   |          |
|------|-----------------------------------------------------------------------------------------------------------------------------------------|-------------------------------------------------|-----------|----|-----|-------------------------------|---|---|----------|
| 1662 | RAB7A Ras-related protein Rab-7a                                                                                                        | IPI00016342                                     | 23,472.00 | 80 | 97  | GADCCVLVFDVTAPNTFK            | R | T | 2,013.94 |
| 1663 | PCNA Proliferating cell nuclear antigen                                                                                                 | IPI00021700                                     | 28,751.30 | 81 | 91  | CAGNEDIITLR                   | K | A | 1,261.62 |
| 1664 | HDGF Hepatoma-derived growth factor                                                                                                     | IPI00020956                                     | 26,770.50 | 81 | 96  | GFSEGLWEIENNPTVK              | K | A | 1,819.89 |
| 1665 | BUB3 Mitotic checkpoint protein BUB3                                                                                                    | IPI00013468,IPI00514701,IPI00644108             | 37,136.70 | 81 | 100 | MHDLNTDQENLVGTHDAPIR          | K | C | 2,292.07 |
| 1666 | SLC25A5 ADP/ATP translocase 2                                                                                                           | IPI00007188                                     | 32,878.50 | 81 | 92  | YFPTQALNFAFK                  | R | D | 1,446.74 |
| 1667 | SLC25A6 ADP/ATP translocase 3                                                                                                           | IPI00291467                                     | 32,849.10 | 81 | 92  | YFPTQALNFAFK                  | R | D | 1,446.74 |
| 1668 | SUB1 Activated RNA polymerase II transcriptional coactivator p15                                                                        | IPI00221222                                     | 14,377.90 | 81 | 86  | VLIDIR                        | K | E | 728.4666 |
| 1669 | CHMP2A Charged multivesicular body protein 2a                                                                                           | IPI00004416                                     | 25,087.00 | 81 | 89  | ANIQAVSLK                     | R | I | 943.5571 |
| 1670 | SNCA Isoform 1 of Alpha-synuclein                                                                                                       | IPI00024107,IPI00218467                         | 14,441.30 | 81 | 96  | TVEGAGSIAAATGFVK              | K | K | 1,478.79 |
| 1671 | ENO1 Isoform alpha-enolase of Alpha-enolase                                                                                             | IPI00465248                                     | 47,152.20 | 81 | 92  | KLNVTEQEKIDK                  | K | L | 1,444.80 |
| 1672 | NPM1 Isoform 2 of Nucleophosmin                                                                                                         | IPI00220740,IPI00549248                         | 29,446.90 | 81 | 101 | MSVQPTVSLGGFEITPPVVLK         | K | L | 2,243.21 |
| 1673 | SGTA Small glutamine-rich tetratricopeptide repeat-containing protein alpha                                                             | IPI00013949                                     | 34,045.90 | 81 | 93  | TPPSEEDSAEAER                 | R | L | 1,417.61 |
| 1674 | SGTA Small glutamine-rich tetratricopeptide repeat-containing protein alpha                                                             | IPI00013949                                     | 34,045.90 | 81 | 93  | TPPSEEDSAEAER                 | R | L | 1,417.61 |
| 1675 | RPL24 60S ribosomal protein L24                                                                                                         | IPI00306332,IPI00791426,IPI00793696,IPI00873403 | 17,761.50 | 81 | 94  | AITGASLADIMAKR                | R | N | 1,433.78 |
| 1676 | TSEN34 27 kDa protein                                                                                                                   | IPI00657943,IPI00658061,IPI00894217             | 27,261.80 | 81 | 91  | HHSALTSFKR                    | R | Q | 1,296.72 |
| 1677 | HIST1H4H;HIST2H4A;HIST4H4;HIST1H4F;HIST1H4D;HIST1H4K;HIST1H4C;HIST1H4J;HIST1H4A;HIST1H4I;HIST1H4B;HIST2H4B;HIST1H4E;HIST1H4L Histone H4 | IPI00453473                                     | 11,349.70 | 81 | 93  | TVTAMDVVYALKR                 | K | Q | 1,466.80 |
| 1678 | HIST1H4H;HIST2H4A;HIST4H4;HIST1H4F;HIST1H4D;HIST1H4K;HIST1H4C;HIST1H4J;HIST1H4A;HIST1H4I;HIST1H4B;HIST2H4B;HIST1H4E;HIST1H4L Histone H4 | IPI00453473                                     | 11,349.70 | 81 | 93  | TVTAMDVVYALKR                 | K | Q | 1,466.80 |
| 1679 | HIST1H4H;HIST2H4A;HIST4H4;HIST1H4F;HIST1H4D;HIST1H4K;HIST1H4C;HIST1H4J;HIST1H4A;HIST1H4I;HIST1H4B;HIST2H4B;HIST1H4E;HIST1H4L Histone H4 | IPI00453473                                     | 11,349.70 | 81 | 93  | TVTAMDVVYALKR                 | K | Q | 1,466.80 |
| 1680 | RPL24 60S ribosomal protein L24                                                                                                         | IPI00306332,IPI00791426,IPI00793696,IPI00873403 | 17,761.50 | 81 | 93  | AITGASLADIMAK                 | R | R | 1,261.68 |
| 1681 | RPS10 40S ribosomal protein S10                                                                                                         | IPI00008438                                     | 18,880.30 | 81 | 95  | DYLHLPPEIVPATLR               | R | R | 1,733.96 |
| 1682 | HIST1H4H;HIST2H4A;HIST4H4;HIST1H4F;HIST1H4D;HIST1H4K;HIST1H4C;HIST1H4J;HIST1H4A;HIST1H4I;HIST1H4B;HIST2H4B;HIST1H4E;HIST1H4L Histone H4 | IPI00453473                                     | 11,349.70 | 81 | 92  | TVTAMDVVYALK                  | K | R | 1,326.70 |
| 1683 | RPS10 40S ribosomal protein S10                                                                                                         | IPI00008438                                     | 18,880.30 | 81 | 96  | DYLHLPPEIVPATLRR              | R | S | 1,890.06 |
| 1684 | RPS10 40S ribosomal protein S10                                                                                                         | IPI00008438                                     | 18,880.30 | 81 | 96  | DYLHLPPEIVPATLRR              | R | S | 1,890.06 |
| 1685 | RBM14;RBM4 Isoform 1 of RNA-binding protein 14                                                                                          | IPI00013174                                     | 69,474.30 | 81 | 96  | IFVGNVSAACTSQELR              | K | S | 1,751.87 |
| 1686 | RBM14;RBM4 Isoform 1 of RNA-binding protein 14                                                                                          | IPI00013174                                     | 69,474.30 | 81 | 96  | IFVGNVSAACTSQELR              | K | S | 1,751.87 |
| 1687 | RBM14;RBM4 Isoform 1 of RNA-binding protein 14                                                                                          | IPI00013174                                     | 69,474.30 | 81 | 96  | IFVGNVSAACTSQELR              | K | S | 1,751.87 |
| 1688 | SLC25A5 ADP/ATP translocase 2                                                                                                           | IPI00007188                                     | 32,878.50 | 81 | 94  | YFPTQALNFAFKDK                | R | Y | 1,689.86 |
| 1689 | SLC25A6 ADP/ATP translocase 3                                                                                                           | IPI00291467                                     | 32,849.10 | 81 | 94  | YFPTQALNFAFKDK                | R | Y | 1,689.86 |
| 1690 | MRPL11 39S ribosomal protein L11, mitochondrial                                                                                         | IPI00007001,IPI00333848                         | 20,665.90 | 82 | 92  | IGQPTVSYFLK                   | K | A | 1,252.69 |
| 1691 | DSTN Destrin                                                                                                                            | IPI00473014                                     | 18,488.20 | 82 | 92  | YALYDASFETK                   | R | E | 1,307.62 |
| 1692 | CFL1 Cofilin-1                                                                                                                          | IPI00012011                                     | 18,485.10 | 82 | 92  | YALYDATYETK                   | R | E | 1,337.63 |
| 1693 | TRAPPC5 Trafficking protein particle complex subunit 5                                                                                  | IPI00177509                                     | 20,765.40 | 82 | 90  | VLGALLFVK                     | K | G | 959.6289 |
| 1694 | RPA2 Isoform 1 of Replication protein A 32 kDa subunit                                                                                  | IPI00013939,IPI00646500,IPI00647667             | 29,228.70 | 82 | 93  | HAEKAPTNIYYK                  | R | I | 1,370.74 |
| 1695 | CTPS CTP synthase 1                                                                                                                     | IPI00290142                                     | 66,672.70 | 82 | 92  | LTKDNNLTGK                    | R | I | 1,204.65 |
| 1696 | LDHA Isoform 1 of L-lactate dehydrogenase A chain                                                                                       | IPI00217966                                     | 36,671.20 | 82 | 90  | DYNVTANSK                     | K | L | 1,011.47 |
| 1697 | PTMS Parathyrosin                                                                                                                       | IPI00550020,IPI00783736,IPI00815656,IPI00830138 | 11,511.60 | 82 | 93  | AAEEEDEADPKR                  | R | Q | 1,359.60 |
| 1698 | RPA2 Isoform 1 of Replication protein A 32 kDa subunit                                                                                  | IPI00013939,IPI00646500,IPI00647667             | 29,228.70 | 82 | 105 | HAEKAPTNIYYKIDDMTAAAPM<br>DVR | R | Q | 2,718.32 |

|      |                                                                           |                                                                                                 |            |    |     |                                        |   |   |          |
|------|---------------------------------------------------------------------------|-------------------------------------------------------------------------------------------------|------------|----|-----|----------------------------------------|---|---|----------|
| 1699 | PTRH2 Peptidyl-tRNA hydrolase 2, mitochondrial                            | IPI00032903,IPI0055597                                                                          | 19,175.70  | 82 | 95  | VAAQCShAAVSAYK                         | K | Q | 1,462.71 |
| 1700 | HNRNPF Heterogeneous nuclear ribonucleoprotein F                          | IPI00003881                                                                                     | 45,653.80  | 82 | 87  | YIEVFK                                 | R | S | 798.4396 |
| 1701 | HNRNPH1 Heterogeneous nuclear ribonucleoprotein H                         | IPI00013881,IPI00479191                                                                         | 49,211.80  | 82 | 87  | YVEVFK                                 | R | S | 784.4239 |
| 1702 | HNRNPH2 Heterogeneous nuclear ribonucleoprotein H2                        | IPI00026230                                                                                     | 49,246.10  | 82 | 87  | YVEVFK                                 | R | S | 784.4239 |
| 1703 | WDR68 WD repeat-containing protein 68                                     | IPI00006754                                                                                     | 38,908.30  | 82 | 96  | GVYPDLLATSGDYLR                        | K | V | 1,639.83 |
| 1704 | PPAT Amidophosphoribosyltransferase                                       | IPI00029534                                                                                     | 57,381.30  | 82 | 93  | LYVSNLIGIGHTR                          | K | Y | 1,329.73 |
| 1705 | PDCD10 Programmed cell death protein 10                                   | IPI00298558                                                                                     | 24,684.50  | 83 | 106 | MAADDVEEYMIERPEPEFQD<br>LNEK           | R | A | 2,930.27 |
| 1706 | HSP90AB1 Heat shock protein HSP 90-beta                                   | IPI00414676                                                                                     | 83,249.30  | 83 | 95  | TLTLVDTGIGMTK                          | R | A | 1,365.73 |
| 1707 | HSP90AB1 Heat shock protein HSP 90-beta                                   | IPI00414676                                                                                     | 83,249.30  | 83 | 95  | TLTLVDTGIGMTK                          | R | A | 1,365.73 |
| 1708 | GSTP1 Glutathione S-transferase P                                         | IPI00219757                                                                                     | 23,338.70  | 83 | 101 | DQQEALVDMVNDGVEDLR                     | K | C | 2,132.98 |
| 1709 | TXNDC1 Thioredoxin domain-containing protein 1                            | IPI00395887                                                                                     | 31,773.90  | 83 | 94  | VDVTEQPGLSGR                           | K | F | 1,257.64 |
| 1710 | RAB11B Ras-related protein Rab-11B                                        | IPI00020436                                                                                     | 24,471.00  | 83 | 95  | GAVGALLVYDIAK                          | R | H | 1,289.75 |
| 1711 | TRMT1 Isoform 1 of N(2),N(2)-dimethylguanosine tRNA methyltransferase     | IPI00020508,IPI00178861                                                                         | 72,215.30  | 83 | 94  | DLTCAVITEFAR                           | R | I | 1,395.69 |
| 1712 | DDRK1 Isoform 1 of Uncharacterized protein C20orf116                      | IPI00028387                                                                                     | 35,593.00  | 83 | 116 | VAWAEADENEEEAVALAQEEE<br>GVEKPAETHLSGK | R | I | 3,707.76 |
| 1713 | HIST1H2AB;HIST1H2AE Histone H2A type 1-B/E                                | IPI00026272,IPI00031562,IPI00216456                                                             | 14,118.00  | 83 | 96  | HLQLAIRNDEELNK                         | R | L | 1,692.90 |
| 1714 | HIST1H2AB;HIST1H2AE Histone H2A type 1-B/E                                | IPI00026272,IPI00031562,IPI00216456                                                             | 14,118.00  | 83 | 96  | HLQLAIRNDEELNK                         | R | L | 1,692.90 |
| 1715 | HIST1H2AH Histone H2A type 1-H                                            | IPI00081836,IPI00216457,IPI00220855,IPI00255316,IPI00291764,IPI00339274,IPI00552873,IPI00902514 | 13,888.80  | 83 | 96  | HLQLAIRNDEELNK                         | R | L | 1,692.90 |
| 1716 | HIST1H2AH Histone H2A type 1-H                                            | IPI00081836,IPI00216457,IPI00220855,IPI00255316,IPI00291764,IPI00339274,IPI00552873,IPI00902514 | 13,888.80  | 83 | 96  | HLQLAIRNDEELNK                         | R | L | 1,692.90 |
| 1717 | HIST1H2AB;HIST1H2AE Histone H2A type 1-B/E                                | IPI00026272,IPI00031562,IPI00216456                                                             | 14,118.00  | 83 | 89  | HLQLAIR                                | R | N | 850.5258 |
| 1718 | HIST1H2AH Histone H2A type 1-H                                            | IPI00081836,IPI00216457,IPI00220855,IPI00255316,IPI00291764,IPI00339274,IPI00552873,IPI00902514 | 13,888.80  | 83 | 89  | HLQLAIR                                | R | N | 850.5258 |
| 1719 | HNRNPA2B1 43 kDa protein                                                  | IPI00874030                                                                                     | 43,234.30  | 83 | 99  | KLFIGGLSFETTEESLR                      | R | N | 1,927.02 |
| 1720 | PSMA1 Isoform Short of Proteasome subunit alpha type-1                    | IPI00016832,IPI00472442                                                                         | 29,538.00  | 83 | 89  | LLCNFMR                                | R | Q | 953.4696 |
| 1721 | CNP Isoform CNPI of 2',3'-cyclic-nucleotide 3'-phosphodiesterase          | IPI00220993,IPI00306667                                                                         | 45,082.30  | 83 | 92  | LDEDLAAYCR                             | R | R | 1,225.55 |
| 1722 | HSPA5 HSPA5 protein                                                       | IPI00003362                                                                                     | 72,405.60  | 83 | 97  | NQLTSNPENTVFDKAK                       | K | R | 1,677.81 |
| 1723 | RPL10 60S ribosomal protein L10                                           | IPI00554723,IPI00646899,IPI00853161                                                             | 24,586.60  | 83 | 88  | DGFHIR                                 | K | V | 744.3788 |
| 1724 | CGGBP1 CGG triplet repeat-binding protein 1                               | IPI00295585                                                                                     | 18,802.20  | 83 | 100 | QRPLTASLQCNSTAQTEK                     | K | V | 2,033.01 |
| 1725 | GSTP1 Glutathione S-transferase P                                         | IPI00219757                                                                                     | 23,338.70  | 83 | 103 | DQQEALVDMVNDGVEDLRC<br>K               | K | Y | 2,421.10 |
| 1726 | EIF1AX;EIF1AP1 Eukaryotic translation initiation factor 1A, X-chromosomal | IPI00232533                                                                                     | 16,443.30  | 83 | 94  | DYQDNKADVILK                           | R | Y | 1,421.73 |
| 1727 | PDIA3 Protein disulfide-isomerase A3                                      | IPI00025252                                                                                     | 56,766.60  | 83 | 94  | VDCTANTNTCNK                           | K | Y | 1,397.58 |
| 1728 | EEF1D Elongation factor 1-delta                                           | IPI00023048                                                                                     | 31,103.90  | 84 | 95  | IASLEVENQSLR                           | R | G | 1,358.73 |
| 1729 | EEF1D Elongation factor 1-delta                                           | IPI00023048                                                                                     | 31,103.90  | 84 | 95  | IASLEVENQSLR                           | R | G | 1,358.73 |
| 1730 | WDR54 Isoform 1 of WD repeat-containing protein 54                        | IPI00029811                                                                                     | 35,872.20  | 84 | 92  | VLLVLTSHR                              | R | G | 1,037.65 |
| 1731 | PHB Prohibitin                                                            | IPI00017334,IPI00791634                                                                         | 29,786.60  | 84 | 93  | DLQNVNITLR                             | K | I | 1,185.66 |
| 1732 | RDH11 Isoform 1 of Retinol dehydrogenase 11                               | IPI00339384                                                                                     | 35,368.50  | 84 | 97  | EIQTTTGNQQVLVR                         | K | K | 1,586.85 |
| 1733 | KPNA2;LOC728860 Importin subunit alpha-2                                  | IPI00002214,IPI00789457                                                                         | 57,844.50  | 84 | 101 | GINSSNVENQLQATQAAR                     | K | K | 1,900.95 |
| 1734 | PSPC1 Isoform 1 of Paraspeckle component 1                                | IPI00103525,IPI00395775                                                                         | 58,726.50  | 84 | 100 | LFVGNLPTDITEEDFKR                      | R | L | 1,994.02 |
| 1735 | ARD1A N-terminal acetyltransferase complex ARD1 subunit homolog A         | IPI00013184                                                                                     | 26,441.00  | 84 | 89  | LGLAQK                                 | R | L | 629.3982 |
| 1736 | LRRC59 Leucine-rich repeat-containing protein 59                          | IPI00396321                                                                                     | 34,913.40  | 84 | 96  | LVNLQHLDLLNKK                          | R | L | 1,533.87 |
| 1737 | SEPT11 Septin-11                                                          | IPI00019376                                                                                     | 49,381.10  | 84 | 93  | SYELQESNVR                             | R | L | 1,224.59 |
| 1738 | LTA4H Isoform 1 of Leukotriene A-4 hydrolase                              | IPI00219077                                                                                     | 69,269.10  | 84 | 97  | GSPMEISLPIALSK                         | K | N | 1,458.79 |
| 1739 | HNRNPA2B1 43 kDa protein                                                  | IPI00874030                                                                                     | 43,234.30  | 84 | 99  | LFVGNLPTDITEEDFKR                      | K | N | 1,798.92 |
| 1740 | TOP2A Isoform 3 of DNA topoisomerase 2-alpha                              | IPI00218753,IPI00414101,IPI00478232,IPI00879004                                                 | 178,700.70 | 84 | 96  | IFDEILVNAADNK                          | K | Q | 1,461.76 |
| 1741 | TOP2A Isoform 3 of DNA topoisomerase 2-alpha                              | IPI00218753,IPI00414101,IPI00478232,IPI00879004                                                 | 178,700.70 | 84 | 96  | IFDEILVNAADNK                          | K | Q | 1,461.76 |

|      |                                                                        |                                     |           |    |     |                               |   |   |          |
|------|------------------------------------------------------------------------|-------------------------------------|-----------|----|-----|-------------------------------|---|---|----------|
| 1742 | PSPC1 Isoform 1 of Paraspeckle component 1                             | IPI00103525,IPI00395775             | 58,726.50 | 84 | 99  | LFVGNLPTDITEEDFK              | R | R | 1,837.92 |
| 1743 | GNL3L Guanine nucleotide-binding protein-like 3-like protein           | IPI00005132,IPI00871959             | 65,555.30 | 84 | 94  | TIESYQCQDVLR                  | R | R | 1,383.66 |
| 1744 | PSMG2 Proteasome assembly chaperone 2                                  | IPI00644482                         | 29,379.40 | 84 | 91  | KLVALQLR                      | R | S | 940.6303 |
| 1745 | RRM2 Ribonucleoside-diphosphate reductase M2 subunit                   | IPI00011118                         | 51,076.50 | 84 | 101 | GLSLVDKENTPPALSGTR            | K | V | 1,854.99 |
| 1746 | ADRM1 Proteasomal ubiquitin receptor ADRM1                             | IPI00033030,IPI00470921             | 42,136.20 | 84 | 92  | RVPQCPSGR                     | K | V | 1,056.54 |
| 1747 | GAPDH Glyceraldehyde-3-phosphate dehydrogenase                         | IPI00219018                         | 36,035.30 | 85 | 107 | IKWGDAGA EYVVESTGVFTT<br>MEK  | K | A | 2,534.21 |
| 1748 | EEF1A1 Elongation factor 1-alpha 1                                     | IPI00396485                         | 50,123.20 | 85 | 96  | YYVTIIDAPGHR                  | K | D | 1,404.73 |
| 1749 | EEF1A1 Elongation factor 1-alpha 1                                     | IPI00396485                         | 50,123.20 | 85 | 96  | YYVTIIDAPGHR                  | K | D | 1,404.73 |
| 1750 | EEF1A1 Elongation factor 1-alpha 1                                     | IPI00396485                         | 50,123.20 | 85 | 96  | YYVTIIDAPGHR                  | K | D | 1,404.73 |
| 1751 | PRDX6 Peroxiredoxin-6                                                  | IPI00220301                         | 25,018.10 | 85 | 108 | DINAYNCEEPTEKLPFPIDDR<br>NR   | K | E | 2,919.39 |
| 1752 | CORO1C Coronin-1C_i3 protein                                           | IPI00867509                         | 58,930.80 | 85 | 97  | VTWSSSFCAVNPR                 | R | F | 1,538.71 |
| 1753 | CORO1C Coronin-1C_i3 protein                                           | IPI00867509                         | 58,930.80 | 85 | 97  | VTWSSSFCAVNPR                 | R | F | 1,538.71 |
| 1754 | UBE2T Ubiquitin-conjugating enzyme E2 T                                | IPI00023087                         | 22,503.80 | 85 | 95  | ICLDVLKLPK                    | R | G | 1,295.78 |
| 1755 | TUBA1A Tubulin alpha-1A chain                                          | IPI00180675                         | 50,117.70 | 85 | 105 | QLFHPEQLITGKEDAANNYAR         | R | G | 2,415.21 |
| 1756 | TUBA1A Tubulin alpha-1A chain                                          | IPI00180675                         | 50,117.70 | 85 | 105 | QLFHPEQLITGKEDAANNYAR         | R | G | 2,415.21 |
| 1757 | TUBA1C Tubulin alpha-1C chain                                          | IPI00218343                         | 49,877.40 | 85 | 105 | QLFHPEQLITGKEDAANNYAR         | R | G | 2,415.21 |
| 1758 | TUBA1B Tubulin alpha-1B chain                                          | IPI00387144,IPI00792677             | 50,133.70 | 85 | 105 | QLFHPEQLITGKEDAANNYAR         | R | G | 2,415.21 |
| 1759 | PTBP1 Isoform 1 of Polypyrimidine tract-binding protein 1              | IPI00179964,IPI00183626,IPI00334175 | 57,204.50 | 85 | 92  | VTNLLMLK                      | K | G | 947.5596 |
| 1760 | RPS12 40S ribosomal protein S12                                        | IPI00013917,IPI00847579             | 14,507.70 | 85 | 93  | LGEWVGLCK                     | K | I | 1,061.55 |
| 1761 | RBP1 retinol binding protein 1, cellular isoform a                     | IPI00219718                         | 22,292.30 | 85 | 93  | ALDVNVALR                     | R | K | 970.568  |
| 1762 | PRDX6 Peroxiredoxin-6                                                  | IPI00220301                         | 25,018.10 | 85 | 97  | DINAYNCEEPTEK                 | K | L | 1,582.67 |
| 1763 | SDSL Serine dehydratase-like                                           | IPI00062419,IPI00790728,IPI00796370 | 34,655.20 | 85 | 105 | KLGIPTIVLPESTSLQVVQR          | R | L | 2,249.32 |
| 1764 | PRDX6 Peroxiredoxin-6                                                  | IPI00220301                         | 25,018.10 | 85 | 106 | DINAYNCEEPTEKLPFPIDDR         | K | N | 2,649.25 |
| 1765 | EEF1A1 Elongation factor 1-alpha 1                                     | IPI00396485                         | 50,123.20 | 85 | 100 | YYVTIIDAPGHRDFIK              | K | N | 1,908.00 |
| 1766 | PIN4 protein (peptidyl-prolyl cis/trans isomerase) NIMA-interacting, 4 | IPI00006658                         | 16,590.50 | 85 | 102 | SGMRFN E VAAQYSEDKAR          | K | Q | 2,074.96 |
| 1767 | CAPNS1 Calpain small subunit 1                                         | IPI00025084                         | 28,298.60 | 85 | 99  | THYSNIEANESE E VR             | R | Q | 1,777.80 |
| 1768 | HNRNPH3 Isoform 1 of Heterogeneous nuclear ribonucleoprotein H3        | IPI00013877,IPI00216492             | 36,909.60 | 85 | 90  | YIEIFR                        | R | S | 840.4614 |
| 1769 | TIPRL Isoform 1 of TIP41-like protein                                  | IPI00745568                         | 31,426.80 | 85 | 95  | VACAEWQESR                    | K | T | 1,364.59 |
| 1770 | RPL27 60S ribosomal protein L27                                        | IPI00219155                         | 15,780.40 | 85 | 93  | YSVDIPLDK                     | R | T | 1,049.55 |
| 1771 | ADRM1 Proteasomal ubiquitin receptor ADRM1                             | IPI00033030,IPI00470921             | 42,136.20 | 85 | 92  | VPQCPSGR                      | R | V | 900.4357 |
| 1772 | PDZD11 Isoform 1 of PDZ domain-containing protein 11                   | IPI00550841,IPI00641523             | 16,113.50 | 86 | 109 | AGLQEGDQVLAVNDVDFQDI<br>EHSK  | R | A | 2,627.26 |
| 1773 | STUB1 Isoform 1 of STIP1 homology and U box-containing protein 1       | IPI00025156                         | 34,839.00 | 86 | 95  | ALELDGQSVK                    | R | A | 1,059.57 |
| 1774 | COPE epsilon subunit of coatamer protein complex isoform c             | IPI00399319,IPI00465132             | 28,755.20 | 86 | 97  | MFADYLAHESRR                  | R | D | 1,495.71 |
| 1775 | RPS25 40S ribosomal protein S25                                        | IPI00012750                         | 13,725.00 | 86 | 94  | AALQELLSK                     | R | G | 972.5725 |
| 1776 | RPS25 40S ribosomal protein S25                                        | IPI00012750                         | 13,725.00 | 86 | 94  | AALQELLSK                     | R | G | 972.5725 |
| 1777 | RPS25 40S ribosomal protein S25                                        | IPI00012750                         | 13,725.00 | 86 | 94  | AALQELLSK                     | R | G | 972.5725 |
| 1778 | TXNL1 Thioredoxin-like protein 1                                       | IPI00305692,IPI00642032             | 32,233.40 | 86 | 102 | VRIDQYQGADAVGLEEK             | K | I | 1,890.96 |
| 1779 | CCDC12 Coiled-coil domain-containing protein 12                        | IPI00453463                         | 19,163.20 | 86 | 110 | VKEQLEAAKPEPVIEEVDLAN<br>LAPR | K | K | 2,758.50 |
| 1780 | HSPA9 Stress-70 protein, mitochondrial                                 | IPI00007765                         | 73,663.30 | 86 | 99  | TTPSVVAFTADGER                | R | L | 1,450.72 |
| 1781 | PTPLAD1 Protein tyrosine phosphatase-like protein PTPLAD1              | IPI00008998                         | 43,143.10 | 86 | 92  | VSQWWER                       | K | L | 990.4791 |

|      |                                                                                                        |                                                             |           |    |     |                                 |   |   |          |
|------|--------------------------------------------------------------------------------------------------------|-------------------------------------------------------------|-----------|----|-----|---------------------------------|---|---|----------|
| 1782 | PTPLAD1 Protein tyrosine phosphatase-like protein<br>PTPLAD1                                           | IPI00008998                                                 | 43,143.10 | 86 | 92  | VSQWWER                         | K | L | 990.4791 |
| 1783 | STMN1 Stathmin                                                                                         | IPI00479997                                                 | 17,285.00 | 86 | 95  | AIEENNNFSK                      | K | M | 1,165.55 |
| 1784 | RPL17;LOC100133931 60S ribosomal protein L17                                                           | IPI00413324,IPI00478208                                     | 21,379.40 | 86 | 96  | KSAEFLHMLK                      | K | N | 1,332.73 |
| 1785 | DDX5 Probable ATP-dependent RNA helicase<br>DDX5                                                       | IPI00017617                                                 | 69,131.70 | 86 | 111 | GHNCPKPVLFNFYEANFPANV<br>MDVIAR | R | Q | 2,989.44 |
| 1786 | SYAP1 Synapse-associated protein 1                                                                     | IPI00059242                                                 | 39,915.40 | 86 | 98  | SVEEGKIDGIIDK                   | K | T | 1,402.74 |
| 1787 | PREP Prolyl endopeptidase                                                                              | IPI00008164                                                 | 80,683.50 | 86 | 98  | YFYFYNTGLQNQR                   | R | V | 1,713.80 |
| 1788 | HMOX1 Heme oxygenase 1                                                                                 | IPI00215893                                                 | 32,801.10 | 86 | 100 | KAALEQDLAFWYGPR                 | R | W | 1,764.91 |
| 1789 | GAPDH Glyceraldehyde-3-phosphate<br>dehydrogenase                                                      | IPI00219018                                                 | 36,035.30 | 87 | 107 | WGDAGAEYVVVESTGVFTTME<br>K      | K | A | 2,293.03 |
| 1790 | EIF2A Isoform 1 of Eukaryotic translation initiation<br>factor 2A                                      | IPI00902564                                                 | 64,973.20 | 87 | 100 | NTVLATWQPYYTTSK                 | K | D | 1,609.82 |
| 1791 | PGK1 Phosphoglycerate kinase 1                                                                         | IPI00169383                                                 | 44,597.30 | 87 | 97  | LLGKDVFLK                       | K | D | 1,232.76 |
| 1792 | GRB2 Isoform 1 of Growth factor receptor-bound<br>protein 2                                            | IPI00021327                                                 | 25,188.80 | 87 | 100 | ESESAPGDFSLSVK                  | R | F | 1,452.69 |
| 1793 | RPS14 40S ribosomal protein S14                                                                        | IPI00026271                                                 | 16,254.90 | 87 | 96  | ELGITALHIK                      | K | L | 1,094.66 |
| 1794 | BTF3 Isoform 1 of Transcription factor BTF3                                                            | IPI00221035                                                 | 22,150.30 | 87 | 94  | KLQFSLKK                        | K | L | 991.63   |
| 1795 | ANP32B Isoform 1 of Acidic leucine-rich nuclear<br>phosphoprotein 32 family member B                   | IPI00007423,IPI00759824                                     | 28,770.60 | 87 | 99  | LPNLTHLNLSGNK                   | K | L | 1,420.79 |
| 1796 | PSMB2 Proteasome subunit beta type-2                                                                   | IPI00028006                                                 | 22,819.50 | 87 | 93  | NLADCLR                         | R | S | 861.4248 |
| 1797 | PRDX5 Isoform Mitochondrial of Peroxiredoxin-5,<br>mitochondrial                                       | IPI00024915,IPI00759663,IPI00876999                         | 22,008.30 | 87 | 102 | GVLFGVPGAFTPGCSK                | K | T | 1,593.81 |
| 1798 | UBL4A Ubiquitin-like protein 4A                                                                        | IPI00005658                                                 | 17,758.90 | 87 | 101 | LADSPPPQVWQLISK                 | R | V | 1,678.92 |
| 1799 | PFKM cDNA FLJ44241 fis, clone THYMU3008436,<br>highly similar to 6-phosphofructokinase, muscle<br>type | IPI00465179,IPI00743142                                     | 93,203.30 | 88 | 106 | AIAVLTSGGDAQGMNAAVR             | K | A | 1,801.92 |
| 1800 | CDKN2A Cyclin-dependent kinase inhibitor                                                               | IPI00001560                                                 | 17,865.30 | 88 | 99  | EGFLDTLVVLR                     | R | A | 1,398.77 |
| 1801 | - Ribosomal protein S27                                                                                | IPI00397358,IPI00513971,IPI00746004,IPI00888491,IPI00888789 | 16,859.90 | 88 | 100 | LVQSPNSYFMDVK                   | R | C | 1,527.75 |
| 1802 | HNRNPH1 Heterogeneous nuclear<br>ribonucleoprotein H                                                   | IPI00013881,IPI00479191                                     | 49,211.80 | 88 | 98  | SNNVEMDWLK                      | K | H | 1,350.64 |
| 1803 | HNRNPH1 Heterogeneous nuclear<br>ribonucleoprotein H                                                   | IPI00013881,IPI00479191                                     | 49,211.80 | 88 | 98  | SNNVEMDWLK                      | K | H | 1,350.64 |
| 1804 | HNRNPH1 Heterogeneous nuclear<br>ribonucleoprotein H                                                   | IPI00013881,IPI00479191                                     | 49,211.80 | 88 | 98  | SNNVEMDWLK                      | K | H | 1,350.64 |
| 1805 | TXNL1 Thioredoxin-like protein 1                                                                       | IPI00305692,IPI00642032                                     | 32,233.40 | 88 | 102 | IDQYQGADAVGLEEK                 | R | I | 1,635.79 |
| 1806 | DEK Protein DEK                                                                                        | IPI00020021,IPI00871695                                     | 42,657.90 | 88 | 93  | LCEIER                          | K | I | 819.403  |
| 1807 | KHSRP KH-type splicing regulatory protein                                                              | IPI00479786,IPI00855957                                     | 73,097.60 | 88 | 110 | IGGDAATTVNNSTPDFGFGG<br>QKR     | K | Q | 2,310.11 |
| 1808 | RPS20 40S ribosomal protein S20                                                                        | IPI00012493,IPI00794659                                     | 13,355.00 | 88 | 99  | LIDLHSPSEIVK                    | R | Q | 1,350.76 |
| 1809 | CROP Isoform 1 of Cisplatin resistance-associated<br>overexpressed protein                             | IPI00107745                                                 | 51,449.10 | 88 | 98  | YLQSLLAEVER                     | R | R | 1,320.72 |
| 1810 | PIN4 protein (peptidyl-prolyl cis/trans isomerase)<br>NIMA-interacting, 4                              | IPI00006658                                                 | 16,590.50 | 89 | 100 | FNEVAAQYSEDK                    | R | A | 1,400.63 |
| 1811 | AK1 Adenylate kinase isoenzyme 1                                                                       | IPI00018342,IPI00640817                                     | 21,617.10 | 89 | 97  | GFLIDGYPR                       | K | E | 1,037.54 |
| 1812 | C11orf46 Uncharacterized protein C11orf46                                                              | IPI00167549                                                 | 29,320.20 | 89 | 104 | NLHVIDLDDATFLSAK                | K | F | 1,771.92 |
| 1813 | NME2 Nucleoside diphosphate kinase B                                                                   | IPI00026260                                                 | 17,280.20 | 89 | 105 | VMLGETNPADSKPGTIR               | R | G | 1,801.91 |
| 1814 | C9orf23 Alba-like protein C9orf23                                                                      | IPI00166873                                                 | 17,613.40 | 89 | 112 | FLQTEDSWVPASPDTGLDPLT<br>VRR    | R | H | 2,700.36 |
| 1815 | RPL7 60S ribosomal protein L7                                                                          | IPI00030179,IPI00472171,IPI00871827                         | 29,209.70 | 89 | 94  | LAFVIR                          | K | I | 718.461  |
| 1816 | SRP14 Signal recognition particle 14 kDa protein                                                       | IPI00293434                                                 | 14,552.60 | 89 | 95  | ANMDGLK                         | R | K | 748.3659 |
| 1817 | PCCA propionyl-Coenzyme A carboxylase, alpha<br>polypeptide isoform a precursor                        | IPI00744115,IPI00796978,IPI00895869                         | 80,041.20 | 89 | 104 | TVAIHSDVDASSVHVK                | K | M | 1,664.86 |
| 1818 | PIN4 protein (peptidyl-prolyl cis/trans isomerase)<br>NIMA-interacting, 4                              | IPI00006658                                                 | 16,590.50 | 89 | 102 | FNEVAAQYSEDKAR                  | R | Q | 1,627.77 |
| 1819 | HMGB1 High mobility group protein B1                                                                   | IPI00419258                                                 | 24,876.70 | 89 | 96  | FKDPNAPK                        | K | R | 916.4888 |
| 1820 | SFRS3 Splicing factor, arginine/serine-rich 3                                                          | IPI00010204,IPI00843996                                     | 19,312.00 | 89 | 98  | NRGPPPSWGR                      | R | R | 1,123.58 |
| 1821 | BID Isoform 1 of BH3-interacting domain death<br>agonist                                               | IPI00413587,IPI00420084,IPI00871585                         | 21,977.30 | 89 | 99  | HLAQVGDSDMR                     | R | S | 1,244.57 |

|      |                                                                                                   |                                                                                                 |            |    |     |                                  |   |          |          |
|------|---------------------------------------------------------------------------------------------------|-------------------------------------------------------------------------------------------------|------------|----|-----|----------------------------------|---|----------|----------|
| 1822 | CACYBP Isoform 1 of Calcyclin-binding protein                                                     | IPI00395627                                                                                     | 26,192.30  | 89 | 111 | IYITLTGVHQVPTENVQVHFTE K<br>R    | S | 2,681.40 |          |
| 1823 | RCC1 regulator of chromosome condensation 1 isoform a                                             | IPI00001661,IPI00747309,IPI00787306                                                             | 48,126.30  | 89 | 115 | KKPALVSIPEVVQAEAGGMH R<br>TVCLSK | S | 2,880.50 |          |
| 1824 | EMD Emerin                                                                                        | IPI00032003                                                                                     | 28,976.90  | 89 | 103 | GYNDLIIYEEESYFTR                 | K | T        | 1,922.77 |
| 1825 | C11orf73 Uncharacterized protein C11orf73                                                         | IPI00410091                                                                                     | 21,609.50  | 89 | 104 | SGEGSQHPFGAMNIVR                 | K | T        | 1,686.80 |
| 1826 | FKBP4 FK506-binding protein 4                                                                     | IPI00219005                                                                                     | 51,787.90  | 89 | 98  | AWDIAIATMK                       | K | V        | 1,135.58 |
| 1827 | HSPA8 Isoform 1 of Heat shock cognate 71 kDa protein                                              | IPI00003865                                                                                     | 70,881.80  | 89 | 102 | HWPFMVVNDAGRPK                   | K | V        | 1,653.83 |
| 1828 | HSPA1A;HSPA1B Heat shock 70 kDa protein 1                                                         | IPI00304925                                                                                     | 70,036.00  | 89 | 102 | HWPFQVINDGDKPK                   | K | V        | 1,680.85 |
| 1829 | EIF1AX;EIF1AP1 Eukaryotic translation initiation factor 1A, X-chromosomal                         | IPI00232533                                                                                     | 16,443.30  | 89 | 94  | ADVILK                           | K | Y        | 658.4135 |
| 1830 | ARD1A N-terminal acetyltransferase complex ARD1 subunit homolog A                                 | IPI00013184                                                                                     | 26,441.00  | 90 | 96  | LMDQASR                          | K | A        | 820.3982 |
| 1831 | CCT4 T-complex protein 1 subunit delta                                                            | IPI00302927,IPI00873222                                                                         | 57,907.90  | 90 | 96  | MLVELSK                          | R | A        | 835.4595 |
| 1832 | TCEA1 Isoform 1 of Transcription elongation factor A protein 1                                    | IPI00333215                                                                                     | 33,952.60  | 90 | 104 | KKEPAITSQNSPEAR                  | K | E        | 1,655.87 |
| 1833 | RARS Isoform Complexed of Arginyl-tRNA synthetase, cytoplasmic                                    | IPI00004860                                                                                     | 75,364.00  | 90 | 109 | AAYPDLENPPLLVTSPQAK              | K | F        | 2,152.13 |
| 1834 | PARK7 Protein DJ-1                                                                                | IPI00298547                                                                                     | 19,873.10  | 90 | 98  | EILKEQENR                        | K | K        | 1,158.61 |
| 1835 | PYCR2 Pyrroline-5-carboxylate reductase 2                                                         | IPI00470610,IPI00747534                                                                         | 33,619.80  | 90 | 107 | HIVVSCAAGVTISSVEKK               | R | L        | 1,885.02 |
| 1836 | CDC123 Cell division cycle protein 123 homolog                                                    | IPI00005670                                                                                     | 39,118.10  | 90 | 104 | VQEAINSLGGSVFPK                  | K | L        | 1,545.83 |
| 1837 | TIA1 Isoform Long of Nucleolysin TIA-1 isoform p40                                                | IPI00291398,IPI00743479                                                                         | 42,944.20  | 90 | 101 | DTSSSTVVSTQR                     | K | S        | 1,267.61 |
| 1838 | SPEN Msx2-interacting protein                                                                     | IPI00045914                                                                                     | 402,226.70 | 90 | 100 | GLDDTVSIASR                      | R | S        | 1,133.58 |
| 1839 | HIST1H2AH Histone H2A type 1-H                                                                    | IPI00081836,IPI00216457,IPI00220855,IPI00255316,IPI00291764,IPI00339274,IPI00552873,IPI00902514 | 13,888.80  | 90 | 100 | NDEELNKLKLGK                     | R | V        | 1,272.68 |
| 1840 | HIST1H2AH Histone H2A type 1-H                                                                    | IPI00081836,IPI00216457,IPI00220855,IPI00255316,IPI00291764,IPI00339274,IPI00552873,IPI00902514 | 13,888.80  | 90 | 100 | NDEELNKLKLGK                     | R | V        | 1,272.68 |
| 1841 | HIST1H2AB;HIST1H2AE Histone H2A type 1-B/E                                                        | IPI00026272,IPI00031562,IPI00216456                                                             | 14,118.00  | 90 | 100 | NDEELNKLKLGK                     | R | V        | 1,300.69 |
| 1842 | HIST1H2AB;HIST1H2AE Histone H2A type 1-B/E                                                        | IPI00026272,IPI00031562,IPI00216456                                                             | 14,118.00  | 90 | 100 | NDEELNKLKLGK                     | R | V        | 1,300.69 |
| 1843 | GDI1 Rab GDP dissociation inhibitor alpha                                                         | IPI00010154,IPI00910113                                                                         | 50,566.10  | 90 | 98  | MLLYTEVTR                        | K | Y        | 1,125.60 |
| 1844 | GNAI3 Guanine nucleotide-binding protein G(k) subunit alpha                                       | IPI00220578                                                                                     | 40,515.40  | 91 | 100 | LKIDFGEAAR                       | R | A        | 1,119.62 |
| 1845 | GOT2 Aspartate aminotransferase, mitochondrial                                                    | IPI00018206                                                                                     | 47,458.60  | 91 | 107 | NLDKEYLPIGGLAEFCK                | K | A        | 1,966.99 |
| 1846 | PBK cDNA FLJ58333, highly similar to T-lymphokine-activated killer cell-originated protein kinase | IPI00306708                                                                                     | 37,194.90  | 91 | 101 | SLHHPNIVGYR                      | K | A        | 1,292.69 |
| 1847 | REEP3 Isoform 1 of Receptor expression-enhancing protein 3                                        | IPI00164434,IPI00658022                                                                         | 29,246.70  | 91 | 99  | FLHPLLSSK                        | K | E        | 1,041.61 |
| 1848 | ARL6IP1 ADP-ribosylation factor-like protein 6-interacting protein 1                              | IPI00014232                                                                                     | 23,345.50  | 91 | 104 | IFGSNKWTEQQQR                    | R | F        | 1,722.86 |
| 1849 | NOP56 Nucleolar protein 5A                                                                        | IPI00411937                                                                                     | 66,034.00  | 91 | 99  | VLLGVGDPK                        | K | I        | 897.5406 |
| 1850 | RUVBL1 Isoform 1 of RuvB-like 1                                                                   | IPI00021187                                                                                     | 50,211.40  | 91 | 107 | VPFCPMVGSEVYSTEIK                | K | K        | 1,942.93 |
| 1851 | HN1L Isoform 1 of Hematological and neurological expressed 1-like protein                         | IPI00027397,IPI00909195                                                                         | 20,045.60  | 91 | 104 | TSDIFGSPVTATSR                   | K | L        | 1,438.72 |
| 1852 | SSB Lupus La protein                                                                              | IPI00009032,IPI00916802                                                                         | 46,821.00  | 91 | 109 | RSPSKPLPEVTDEYKNDVK              | R | N        | 2,202.14 |
| 1853 | MBD3 Isoform 1 of Methyl-CpG-binding domain protein 3                                             | IPI00439194,IPI00439195                                                                         | 32,826.30  | 91 | 102 | GKPDNLNTALPVR                    | K | Q        | 1,280.73 |
| 1854 | LDHA Isoform 1 of L-lactate dehydrogenase A chain                                                 | IPI00217966                                                                                     | 36,671.20  | 91 | 99  | LVIITAGAR                        | K | Q        | 913.583  |
| 1855 | RPS7 40S ribosomal protein S7                                                                     | IPI00013415                                                                                     | 22,109.50  | 91 | 98  | HVVVIAQR                         | K | R        | 969.5628 |
| 1856 | CIAO1 Protein CIAO1                                                                               | IPI00008791                                                                                     | 37,820.90  | 91 | 109 | NQDDFECVTTLEGHENEVK              | K | S        | 2,263.98 |
| 1857 | RPL30 60S ribosomal protein L30                                                                   | IPI00219156,IPI00872940                                                                         | 12,766.70  | 91 | 106 | VCTLAIIDPGDSDIIR                 | R | S        | 1,757.91 |
| 1858 | ATIC Bifunctional purine biosynthesis protein PURH                                                | IPI00289499                                                                                     | 64,598.50  | 91 | 97  | LDNFLIR                          | R | V        | 890.5095 |
| 1859 | WDR82 WD repeat-containing protein 82                                                             | IPI00152695                                                                                     | 35,062.40  | 91 | 98  | YLSLHDNK                         | R | Y        | 989.5051 |
| 1860 | NONO Non-POU domain-containing octamer-binding protein                                            | IPI00304596                                                                                     | 54,213.60  | 92 | 99  | KLFEKYGK                         | R | A        | 1,012.58 |
| 1861 | PGK1 Phosphoglycerate kinase 1                                                                    | IPI00169383                                                                                     | 44,597.30  | 92 | 97  | DVLFLK                           | K | D        | 734.4448 |

|      |                                                                                   |                                                             |           |    |     |                                 |   |   |          |
|------|-----------------------------------------------------------------------------------|-------------------------------------------------------------|-----------|----|-----|---------------------------------|---|---|----------|
| 1862 | YWHAZ 14-3-3 protein zeta/delta                                                   | UPI00021263                                                 | 27,727.90 | 92 | 103 | DICNDVLSLLEK                    | R | F | 1,418.72 |
| 1863 | CALM1;CALM3;CALM2 Calmodulin                                                      | UPI00075248,UPI00386621,UPI00794543,UPI00916768             | 16,820.00 | 92 | 107 | VFDKDGNGYISAAELR                | R | H | 1,754.87 |
| 1864 | MCM3 cDNA FLJ55599, highly similar to DNA replication licensing factor MCM3       | UPI00013214                                                 | 95,892.30 | 92 | 101 | LIVNVNDLRR                      | R | K | 1,211.72 |
| 1865 | PCNA Proliferating cell nuclear antigen                                           | UPI00021700                                                 | 28,751.30 | 92 | 117 | AEDNADTLALVFEAPNQEKVS<br>DYEMK  | R | L | 2,943.36 |
| 1866 | PSIP1 Isoform 1 of PC4 and SFRS1-interacting protein                              | UPI00028122                                                 | 60,085.90 | 92 | 100 | FSSQQAATK                       | K | Q | 967.4843 |
| 1867 | PSIP1 Isoform 1 of PC4 and SFRS1-interacting protein                              | UPI00028122                                                 | 60,085.90 | 92 | 100 | FSSQQAATK                       | K | Q | 967.4843 |
| 1868 | LDHB L-lactate dehydrogenase B chain                                              | UPI00219217                                                 | 36,620.60 | 92 | 100 | IVVVTAGVR                       | K | Q | 913.5829 |
| 1869 | LDHB L-lactate dehydrogenase B chain                                              | UPI00219217                                                 | 36,620.60 | 92 | 100 | IVVVTAGVR                       | K | Q | 913.5829 |
| 1870 | PPIA Peptidyl-prolyl cis-trans isomerase A                                        | UPI00419585,UPI00887678                                     | 17,994.90 | 92 | 118 | HTGPGILSMANAGPNTNGSQ<br>FFICTAK | K | T | 2,791.33 |
| 1871 | PPIA Peptidyl-prolyl cis-trans isomerase A                                        | UPI00419585,UPI00887678                                     | 17,994.90 | 92 | 118 | HTGPGILSMANAGPNTNGSQ<br>FFICTAK | K | T | 2,807.32 |
| 1872 | PFN1 Profilin-1                                                                   | UPI00216691                                                 | 15,036.30 | 92 | 105 | STGGAPTFNVTVK                   | K | T | 1,379.72 |
| 1873 | PCNA Proliferating cell nuclear antigen                                           | UPI00021700                                                 | 28,751.30 | 92 | 110 | AEDNADTLALVFEAPNQEK             | R | V | 2,074.99 |
| 1874 | QPRT Nicotinate-nucleotide pyrophosphorylase [carboxylatinal]                     | UPI00300086,UPI00872692                                     | 30,797.30 | 92 | 102 | GPAHCLLLGER                     | R | V | 1,222.64 |
| 1875 | NUDT1 Isoform p26 of 7,8-dihydro-8-oxoguanine triphosphatase                      | UPI00004392,UPI00396056,UPI00644344,UPI00759462,UPI00759578 | 22,533.80 | 92 | 107 | RELQEESGLTVDALHK                | R | V | 1,824.95 |
| 1876 | SSR3 cDNA FLJ52061, highly similar to Translocon-associated protein subunit gamma | UPI00009235                                                 | 22,593.20 | 93 | 102 | EDAVSKEVTR                      | R | K | 1,133.58 |
| 1877 | HNRNPA1 Isoform A1-B of Heterogeneous nuclear ribonucleoprotein A1                | UPI00215965,UPI00465365                                     | 38,828.10 | 93 | 105 | EDSQRPGAHLTVK                   | R | K | 1,437.74 |
| 1878 | MRPL43 Isoform 4 of 39S ribosomal protein L43, mitochondrial                      | UPI00428288                                                 | 17,834.70 | 93 | 103 | SVEEISTLVQK                     | K | L | 1,232.67 |
| 1879 | HNRNPAB Isoform 3 of Heterogeneous nuclear ribonucleoprotein A/B                  | UPI00334713                                                 | 30,570.20 | 93 | 102 | FGEVVDCTIK                      | K | M | 1,167.57 |
| 1880 | HNRNPAB Isoform 3 of Heterogeneous nuclear ribonucleoprotein A/B                  | UPI00334713                                                 | 30,570.20 | 93 | 102 | FGEVVDCTIK                      | K | M | 1,167.57 |
| 1881 | SAMM50 Sorting and assembly machinery component 50 homolog                        | UPI00412713,UPI00871854                                     | 51,959.50 | 93 | 97  | LGIFR                           | R | Q | 605.377  |
| 1882 | ENO1 Isoform alpha-enolase of Alpha-enolase                                       | UPI00465248                                                 | 47,152.20 | 93 | 103 | LMIEMDGTENK                     | K | S | 1,296.58 |
| 1883 | PRDX1 Peroxiredoxin-1                                                             | UPI00000874                                                 | 22,092.90 | 93 | 110 | KQGGLGPMNIPLVSDPKR              | K | T | 1,923.05 |
| 1884 | NUDT1 Isoform p26 of 7,8-dihydro-8-oxoguanine triphosphatase                      | UPI00004392,UPI00396056,UPI00644344,UPI00759462,UPI00759578 | 22,533.80 | 93 | 107 | ELQEESGLTVDALHK                 | R | V | 1,668.84 |
| 1885 | PFDN4 Prefoldin subunit 4                                                         | UPI00015891                                                 | 15,296.60 | 93 | 104 | NLQEEIDALESR                    | K | V | 1,416.70 |
| 1886 | STIP1 Stress-induced-phosphoprotein 1                                             | UPI00013894,UPI00871856                                     | 62,624.10 | 94 | 109 | TYEEGLKHEANNPQLK                | R | E | 1,870.93 |
| 1887 | METTL7A Methyltransferase-like protein 7A                                         | UPI00022300                                                 | 28,301.60 | 94 | 105 | VTCIDPNPNFEK                    | R | F | 1,433.67 |
| 1888 | PEBP1 Phosphatidylethanolamine-binding protein 1                                  | UPI00219446                                                 | 21,038.90 | 94 | 113 | GNDISSGTVLSDYVGSPPK             | K | G | 1,949.95 |
| 1889 | PHB Prohibitin                                                                    | UPI00017334,UPI00791634                                     | 29,786.60 | 94 | 105 | ILFRPVASQLPR                    | R | I | 1,396.84 |
| 1890 | H2BFS Histone H2B type F-S                                                        | UPI00477495,UPI00816252                                     | 13,926.60 | 94 | 100 | EIQTAVR                         | R | L | 816.4574 |
| 1891 | H2BFS Histone H2B type F-S                                                        | UPI00477495,UPI00816252                                     | 13,926.60 | 94 | 100 | EIQTAVR                         | R | L | 816.4574 |
| 1892 | RFC4 Replication factor C subunit 4                                               | UPI00017381,UPI00792595                                     | 39,664.50 | 94 | 102 | ELFGPELFR                       | R | L | 1,107.58 |
| 1893 | MRLC2 Myosin regulatory light chain MRLC2                                         | UPI00033494,UPI00220573,UPI00604523                         | 19,762.30 | 94 | 104 | LNGTDPEDVIR                     | K | N | 1,228.62 |
| 1894 | RPA2 Isoform 1 of Replication protein A 32 kDa subunit                            | UPI00013939,UPI00646500,UPI00647667                         | 29,228.70 | 94 | 105 | IDDMTAAPMDVR                    | K | Q | 1,366.60 |
| 1895 | DDI2 Isoform 3 of Protein DDI1 homolog 2                                          | UPI00031618,UPI00796836,UPI00845258                         | 46,553.90 | 94 | 108 | IDFSSIAVPGTSSPR                 | R | Q | 1,533.79 |
| 1896 | RBMX Heterogeneous nuclear ribonucleoprotein G                                    | UPI00304692                                                 | 42,315.70 | 94 | 101 | RGPPPPPR                        | R | S | 873.5055 |
| 1897 | RBMX Heterogeneous nuclear ribonucleoprotein G                                    | UPI00304692                                                 | 42,315.70 | 94 | 101 | RGPPPPPR                        | R | S | 873.5055 |
| 1898 | RBMX Heterogeneous nuclear ribonucleoprotein G                                    | UPI00304692                                                 | 42,315.70 | 94 | 101 | RGPPPPPR                        | R | S | 873.5055 |
| 1899 | RBMX Heterogeneous nuclear ribonucleoprotein G                                    | UPI00304692                                                 | 42,315.70 | 94 | 101 | RGPPPPPR                        | R | S | 873.5055 |
| 1900 | AK2 Isoform 1 of Adenylate kinase isoenzyme 2, mitochondrial                      | UPI00215901                                                 | 26,461.00 | 94 | 103 | NGFLLDGFPR                      | K | T | 1,135.59 |
| 1901 | AK2 Isoform 1 of Adenylate kinase isoenzyme 2, mitochondrial                      | UPI00215901                                                 | 26,461.00 | 94 | 103 | NGFLLDGFPR                      | K | T | 1,135.59 |

|      |                                                                                       |                                                 |           |    |     |                                   |   |   |          |
|------|---------------------------------------------------------------------------------------|-------------------------------------------------|-----------|----|-----|-----------------------------------|---|---|----------|
| 1902 | BTF3 Isoform 1 of Transcription factor BTF3                                           | IPI00221035                                     | 22,150.30 | 94 | 122 | KLGVNNSIGIEEVNMFTNQGT             | K | V | 3,230.63 |
| 1903 | PEBP1 Phosphatidylethanolamine-binding protein 1                                      | IPI00219446                                     | 21,038.90 | 94 | 119 | VIHFNNPK<br>GNDISSGTVLSDYVGSPPK   | K | Y | 2,571.28 |
| 1904 | GDI2 cDNA FLJ60299, highly similar to Rab GDP dissociation inhibitor beta             | IPI00031461                                     | 51,138.50 | 94 | 102 | GTGLHR<br>MLLYTEVTR               | K | Y | 1,125.60 |
| 1905 | GDI2 cDNA FLJ60299, highly similar to Rab GDP dissociation inhibitor beta             | IPI00031461                                     | 51,138.50 | 94 | 102 | MLLYTEVTR                         | K | Y | 1,125.60 |
| 1906 | UTP18 U3 small nucleolar RNA-associated protein 18 homolog                            | IPI00000733                                     | 64,046.80 | 95 | 106 | LRLEEDKPAVER                      | R | C | 1,454.80 |
| 1907 | CSTF3 Cleavage stimulation factor 77 kDa subunit                                      | IPI00015195                                     | 82,906.20 | 95 | 102 | VLHIDLWK                          | K | C | 1,023.60 |
| 1908 | DNAJB6 Isoform A of DnaJ homolog subfamily B member 6                                 | IPI00024523                                     | 36,070.20 | 95 | 101 | NPDDVFR                           | R | E | 862.4054 |
| 1909 | RPSA 33 kDa protein                                                                   | IPI00413108,IPI00553164,IPI00793137,IPI00847766 | 33,295.50 | 95 | 107 | FAAATGATPIAGR                     | K | F | 1,203.65 |
| 1910 | PNO1 RNA-binding protein PNO1                                                         | IPI00024524                                     | 27,907.30 | 95 | 108 | IFTPIVEHLGLQIR                    | K | F | 1,635.96 |
| 1911 | KPNA1 Importin subunit alpha-1                                                        | IPI00303292                                     | 60,232.00 | 95 | 105 | SPEQQLSATQK                       | K | F | 1,216.62 |
| 1912 | H1FX Histone H1x                                                                      | IPI00021924                                     | 22,469.90 | 95 | 106 | ALVQNDTLLQVK                      | K | G | 1,341.77 |
| 1913 | SPR Sepiapterin reductase                                                             | IPI00017469                                     | 28,031.50 | 95 | 109 | LLLINNAGSLGDVSK                   | R | G | 1,513.86 |
| 1914 | YWHAE 14-3-3 protein epsilon                                                          | IPI00000816                                     | 29,157.00 | 95 | 106 | LICCDILDVLDK                      | K | H | 1,476.74 |
| 1915 | POLR2G DNA-directed RNA polymerase II subunit RPB7                                    | IPI00218895                                     | 19,276.60 | 95 | 110 | VGLFTEIGPMSCFISR                  | K | H | 1,829.89 |
| 1916 | NUP37 Nucleoporin Nup37                                                               | IPI00171665                                     | 36,689.20 | 95 | 103 | FCTSAADMK                         | K | I | 1,046.43 |
| 1917 | PABPC1 Isoform 1 of Polyadenylate-binding protein 1                                   | IPI00008524                                     | 70,653.30 | 95 | 104 | KSGVGNFIK                         | R | N | 1,062.63 |
| 1918 | PABPC4 Isoform 1 of Polyadenylate-binding protein 4                                   | IPI00012726,IPI00555747,IPI00642904,IPI00642944 | 70,765.80 | 95 | 104 | KSGVGNVFIK                        | R | N | 1,048.62 |
| 1919 | PDAP1 28 kDa heat- and acid-stable phosphoprotein                                     | IPI00013297                                     | 20,612.80 | 95 | 109 | KVTQLDLDPKELSR                    | K | R | 1,698.94 |
| 1920 | SERPINH1 Serpin H1                                                                    | IPI00032140                                     | 46,424.00 | 95 | 116 | AVLSAEQLRDEEVHAGLGELL             | K | S | 2,405.28 |
| 1921 | GCLM Glutamate--cysteine ligase regulatory subunit                                    | IPI00010090                                     | 30,709.30 | 95 | 107 | LFIVESNSSSSTR                     | K | S | 1,426.72 |
| 1922 | HNRNPM Isoform 1 of Heterogeneous nuclear ribonucleoprotein M                         | IPI00171903,IPI00383296                         | 77,499.30 | 95 | 110 | VGEVTVVELLMDAEGK                  | K | S | 1,768.87 |
| 1923 | ATP5B ATP synthase subunit beta, mitochondrial                                        | IPI00303476                                     | 56,542.50 | 95 | 109 | LVLEVAQHLGESTVR                   | R | T | 1,650.92 |
| 1924 | TBCB Tubulin folding cofactor B                                                       | IPI00293126                                     | 27,307.50 | 95 | 103 | LGEYEDVSR                         | R | V | 1,067.50 |
| 1925 | BTF3 Isoform 1 of Transcription factor BTF3                                           | IPI00221035                                     | 22,150.30 | 95 | 122 | LGVNNSIGIEEVNMFTNQGT              | K | V | 3,102.53 |
| 1926 | YWHAE 14-3-3 protein epsilon                                                          | IPI00000816                                     | 29,157.00 | 95 | 118 | IHFNNPK<br>LICCDILDVLDKHLIPAANTGE | K | V | 2,695.38 |
| 1927 | RPS3 40S ribosomal protein S3                                                         | IPI00011253                                     | 26,670.50 | 95 | 106 | GLCAIAQAESLR                      | R | Y | 1,288.67 |
| 1928 | RPS3 40S ribosomal protein S3                                                         | IPI00011253                                     | 26,670.50 | 95 | 106 | GLCAIAQAESLR                      | R | Y | 1,288.67 |
| 1929 | TBCB Tubulin folding cofactor B                                                       | IPI00293126                                     | 27,307.50 | 95 | 106 | LGEYEDVSRVEK                      | R | Y | 1,423.71 |
| 1930 | CHCHD3 Coiled-coil-helix-coiled-coil-helix domain-containing protein 3, mitochondrial | IPI00015833                                     | 26,134.50 | 96 | 104 | AAANEQLTR                         | R | A | 973.5061 |
| 1931 | STUB1 Isoform 1 of STIP1 homology and U box-containing protein 1                      | IPI00025156                                     | 34,839.00 | 96 | 119 | AHFFLGQCQLEMESYDEAIA              | K | A | 2,886.32 |
| 1932 | FIS1 Mitochondrial fission 1 protein                                                  | IPI00007052                                     | 16,920.30 | 96 | 108 | NLQR<br>GLLQTEPQNNQAK             | R | E | 1,440.74 |
| 1933 | SRM Spermidine synthase                                                               | IPI00292020                                     | 33,806.50 | 96 | 109 | KVLIIGGGDGGVLR                    | R | E | 1,353.82 |
| 1934 | PRIM1 DNA primase small subunit                                                       | IPI00027704,IPI00793754                         | 49,885.70 | 96 | 104 | LGAFQAQEK                         | K | E | 991.5208 |
| 1935 | CLIC1 Chloride intracellular channel protein 1                                        | IPI00010896                                     | 26,905.30 | 96 | 113 | LAALNPESNTAGLDIFAK                | K | F | 1,844.98 |
| 1936 | EEF1G cDNA FLJ56389, highly similar to Elongation factor 1-gamma                      | IPI00000875,IPI00747497                         | 56,132.90 | 96 | 101 | TPEFLR                            | R | K | 762.4145 |
| 1937 | EEF1D Elongation factor 1-delta                                                       | IPI00023048                                     | 31,103.90 | 96 | 107 | GVVQELQQAISK                      | R | L | 1,299.73 |
| 1938 | EEF1D Elongation factor 1-delta                                                       | IPI00023048                                     | 31,103.90 | 96 | 107 | GVVQELQQAISK                      | R | L | 1,299.73 |
| 1939 | PABPC1 Isoform 1 of Polyadenylate-binding protein 1                                   | IPI00008524                                     | 70,653.30 | 96 | 104 | SGVGNFIK                          | K | N | 934.5357 |
| 1940 | HSP90AB1 Heat shock protein HSP 90-beta                                               | IPI00414676                                     | 83,249.30 | 96 | 107 | ADLNNLGTIAK                       | K | S | 1,242.71 |
| 1941 | HSP90AB1 Heat shock protein HSP 90-beta                                               | IPI00414676                                     | 83,249.30 | 96 | 107 | ADLNNLGTIAK                       | K | S | 1,242.71 |



|      |                                                                                                                                          |                                     |           |    |     |                            |   |   |          |
|------|------------------------------------------------------------------------------------------------------------------------------------------|-------------------------------------|-----------|----|-----|----------------------------|---|---|----------|
| 1942 | HSP90AB1 Heat shock protein HSP 90-beta                                                                                                  | IP100414676                         | 83,249.30 | 96 | 107 | ADLNNLGTIAK                | K | S | 1,242.71 |
| 1943 | HSP90AB1 Heat shock protein HSP 90-beta                                                                                                  | IP100414676                         | 83,249.30 | 96 | 107 | ADLNNLGTIAK                | K | S | 1,242.71 |
| 1944 | HSP90AB1 Heat shock protein HSP 90-beta                                                                                                  | IP100414676                         | 83,249.30 | 96 | 107 | ADLNNLGTIAK                | K | S | 1,242.71 |
| 1945 | HSP90AB1 Heat shock protein HSP 90-beta                                                                                                  | IP100414676                         | 83,249.30 | 96 | 107 | ADLNNLGTIAK                | K | S | 1,242.71 |
| 1946 | VCP Transitional endoplasmic reticulum ATPase                                                                                            | IP100022774                         | 89,306.80 | 96 | 109 | LGDVISIQPCPDVK             | R | Y | 1,540.80 |
| 1947 | PSMA7 Isoform 1 of Proteasome subunit alpha type-7                                                                                       | IP100024175                         | 27,869.10 | 96 | 109 | LTVEDPVTVEYITR             | R | Y | 1,634.86 |
| 1948 | HIST1H4H;HIST2H4A;HIST4H4;HIST1H4F;HIST1H4D;HIST1H4K;HIST1H4C;HIST1H4J;HIST1H4A;HIST1H4I;HIST1H4B;HIST2H4B;HIST1H4E;HIST1H4I. Histone H4 | IP100453473                         | 11,349.70 | 97 | 103 | TLYGFGG                    | R | - | 714.3458 |
| 1949 | SF3A3 Splicing factor 3A subunit 3                                                                                                       | IP100029764                         | 58,833.30 | 97 | 115 | KHPNEICVPMSEFEELLK         | R | A | 2,299.15 |
| 1950 | PSAT1 cDNA FLJ56437, highly similar to Phosphoserine aminotransferase                                                                    | IP100001734                         | 45,338.10 | 97 | 106 | IINNTENLVR                 | K | E | 1,185.66 |
| 1951 | SRM Spermidine synthase                                                                                                                  | IP100292020                         | 33,806.50 | 97 | 109 | VLIIGGGDGGVLR              | K | E | 1,225.73 |
| 1952 | WARS Tryptophanyl-tRNA synthetase, cytoplasmic                                                                                           | IP100295400                         | 53,149.60 | 97 | 106 | GIDYDKLIVR                 | K | F | 1,191.67 |
| 1953 | ARL6IP1 ADP-ribosylation factor-like protein 6-interacting protein 1                                                                     | IP100014232                         | 23,345.50 | 97 | 104 | WTTEQQQR                   | K | F | 1,076.51 |
| 1954 | TUBA1A Tubulin alpha-1A chain                                                                                                            | IP100180675                         | 50,117.70 | 97 | 105 | EDAANNYAR                  | K | G | 1,023.45 |
| 1955 | TUBA1A Tubulin alpha-1A chain                                                                                                            | IP100180675                         | 50,117.70 | 97 | 105 | EDAANNYAR                  | K | G | 1,023.45 |
| 1956 | TUBA1C Tubulin alpha-1C chain                                                                                                            | IP100218343                         | 49,877.40 | 97 | 105 | EDAANNYAR                  | K | G | 1,023.45 |
| 1957 | TUBA1B Tubulin alpha-1B chain                                                                                                            | IP100387144,IP100792677             | 50,133.70 | 97 | 105 | EDAANNYAR                  | K | G | 1,023.45 |
| 1958 | RPL17;LOC100133931 60S ribosomal protein L17                                                                                             | IP100413324,IP100478208             | 21,379.40 | 97 | 105 | NAESNAELK                  | K | G | 975.4741 |
| 1959 | LASP1 Isoform 1 of LIM and SH3 domain protein 1                                                                                          | IP100000861,IP100386803,IP100883946 | 29,698.80 | 97 | 109 | GFSVVADTPELQR              | K | I | 1,418.73 |
| 1960 | LASP1 Isoform 1 of LIM and SH3 domain protein 1                                                                                          | IP100000861,IP100386803,IP100883946 | 29,698.80 | 97 | 109 | GFSVVADTPELQR              | K | I | 1,418.73 |
| 1961 | HMGB2 High mobility group protein B2                                                                                                     | IP100219097                         | 24,016.60 | 97 | 112 | RPPSAFFLFCSEHRPK           | K | I | 1,976.00 |
| 1962 | PRPF18 Isoform 1 of Pre-mRNA-splicing factor 18                                                                                          | IP100021146,IP100644341             | 39,843.60 | 97 | 108 | LFGETDYDAFQR               | R | L | 1,461.66 |
| 1963 | TAF9 Adenylate kinase isoenzyme 6                                                                                                        | IP100032879,IP100556532             | 20,043.80 | 97 | 105 | TDTNVLYER                  | R | L | 1,110.54 |
| 1964 | VDAC1 Voltage-dependent anion-selective channel protein 1                                                                                | IP100216308                         | 30,755.90 | 97 | 110 | LTFDSSFSPNTGKK             | K | N | 1,528.76 |
| 1965 | LRRC59 Leucine-rich repeat-containing protein 59                                                                                         | IP100396321                         | 34,913.40 | 97 | 108 | LVTLPVPSFAQLK              | K | N | 1,315.80 |
| 1966 | ELMOD2 ELMO domain-containing protein 2                                                                                                  | IP100217918                         | 34,944.20 | 97 | 106 | MCLLQITGYK                 | K | Q | 1,242.62 |
| 1967 | LBR Lamin-B receptor                                                                                                                     | IP100292135,IP100645733,IP100647596 | 70,688.30 | 97 | 110 | SASASHQADIKEAR             | R | R | 1,470.73 |
| 1968 | ABCE1 ATP-binding cassette sub-family E member 1                                                                                         | IP100303207                         | 67,298.40 | 97 | 116 | LPIPRPGEVGLVGTNGIGK        | R | S | 1,987.17 |
| 1969 | VDAC3 Isoform 1 of Voltage-dependent anion-selective channel protein 3                                                                   | IP100031804,IP100294779             | 30,641.90 | 97 | 110 | LTLDTIFVPNTGKK             | K | S | 1,546.88 |
| 1970 | HSPD1 60 kDa heat shock protein, mitochondrial                                                                                           | IP100784154                         | 61,037.70 | 97 | 121 | LVQDVANNTNEEAGDGTTTAT VLAR | K | S | 2,560.25 |
| 1971 | RFC5 Replication factor C subunit 5                                                                                                      | IP100031514,IP100373883             | 38,480.40 | 97 | 112 | GIDIIRGPILSFASTR           | R | T | 1,715.98 |
| 1972 | TPI1 Isoform 1 of Triosephosphate isomerase                                                                                              | IP100465028                         | 30,772.80 | 97 | 106 | IAVAAQCNCYK                | K | V | 1,137.57 |
| 1973 | BASP1 Brain acid soluble protein 1                                                                                                       | IP100299024                         | 22,675.30 | 98 | 121 | AEPKAPQEQAAPGPAAGG EAPK    | K | A | 2,298.14 |
| 1974 | PGK1 Phosphoglycerate kinase 1                                                                                                           | IP100169383                         | 44,597.30 | 98 | 106 | DCVGPEVEK                  | K | A | 1,032.47 |
| 1975 | MAT2B Isoform 1 of Methionine adenosyltransferase 2 subunit beta                                                                         | IP100002324                         | 37,533.60 | 98 | 122 | RPDVVENQPDAASQLNVDAS       | R | E | 2,608.30 |
| 1976 | SFRS12 Isoform 1 of Splicing factor, arginine/serine-rich 12                                                                             | IP100103497,IP100375462             | 59,364.20 | 98 | 107 | GNLAK MAGDETQPTR           | R | F | 1,105.49 |
| 1977 | PREPL Isoform 1 of Prolyl endopeptidase-like                                                                                             | IP100442171,IP100880064             | 83,911.80 | 98 | 116 | TKLETQPQEEYEIINVEVK        | R | H | 2,290.18 |
| 1978 | PRKAR1A cAMP-dependent protein kinase type I-alpha regulatory subunit                                                                    | IP100021831                         | 42,964.40 | 98 | 115 | GAISAEVYTEEDAASYVR         | R | K | 1,930.90 |
| 1979 | HIST1H1C Histone H1.2                                                                                                                    | IP100217465                         | 21,347.80 | 98 | 106 | GTGASGSFK                  | K | L | 811.3945 |
| 1980 | CTTN Src substrate cortactin                                                                                                             | IP100029601                         | 61,567.40 | 98 | 107 | SAVGHEYQSK                 | K | L | 1,105.53 |
| 1981 | TIMM23 Mitochondrial import inner membrane translocase subunit Tim23                                                                     | IP100007309                         | 21,926.20 | 98 | 112 | LGLKETQNMMAWSKPR           | R | N | 1,758.93 |
| 1982 | PRDX6 Peroxiredoxin-6                                                                                                                    | IP100220301                         | 25,018.10 | 98 | 106 | LPFPIIDDR                  | K | N | 1,085.60 |
| 1983 | PRDX6 Peroxiredoxin-6                                                                                                                    | IP100220301                         | 25,018.10 | 98 | 106 | LPFPIIDDR                  | K | N | 1,085.60 |

|      |                                                                         |                                                 |            |     |     |                      |   |   |          |
|------|-------------------------------------------------------------------------|-------------------------------------------------|------------|-----|-----|----------------------|---|---|----------|
| 1984 | AURKA Serine/threonine-protein kinase 6                                 | IPI00298940                                     | 45,791.80  | 98  | 117 | SKQPLPSAPENNPEEELASK | K | Q | 2,165.07 |
| 1985 | EIF31 Eukaryotic translation initiation factor 3 subunit 1              | IPI00012795                                     | 36,484.00  | 98  | 114 | TCGFDFGGNIIMFSTDK    | R | Q | 1,925.84 |
| 1986 | TLL3;ARPC4 Actin-related protein 2/3 complex subunit 4                  | IPI00554811,IPI00790262                         | 19,649.40  | 98  | 105 | AENFFILR             | R | R | 1,009.55 |
| 1987 | AK1 Adenylate kinase isoenzyme 1                                        | IPI00018342,IPI00640817                         | 21,617.10  | 98  | 107 | EVQQGEEFER           | R | R | 1,250.56 |
| 1988 | MRTO4 mRNA turnover protein 4 homolog                                   | IPI00106491                                     | 27,543.20  | 98  | 107 | GEVGLLFTNR           | R | T | 1,105.60 |
| 1989 | GIN52 DNA replication complex GINS protein PSF2                         | IPI00007146                                     | 21,410.80  | 98  | 114 | LLLNHASDNIPKADEIR    | K | T | 1,919.03 |
| 1990 | EDF1 Isoform 1 of Endothelial differentiation-related factor 1          | IPI00021570                                     | 16,351.00  | 99  | 113 | INEKPQVIADYESGR      | K | A | 1,718.87 |
| 1991 | TPD52 tumor protein D52 isoform 2                                       | IPI00619951,IPI00619958,IPI00873344,IPI00896474 | 22,459.40  | 99  | 109 | TSETLSQAGQK          | K | A | 1,149.57 |
| 1992 | RPL18A 60S ribosomal protein L18a                                       | IPI00026202                                     | 20,744.60  | 99  | 111 | DLTTAGAVTQCYR        | R | D | 1,455.69 |
| 1993 | HNRNPA0 Heterogeneous nuclear ribonucleoprotein A0                      | IPI00011913                                     | 30,822.50  | 99  | 106 | KLFFVGGGLK           | K | G | 861.5558 |
| 1994 | RPS7 40S ribosomal protein S7                                           | IPI00013415                                     | 22,109.50  | 99  | 106 | RILPKPTR             | R | K | 980.6365 |
| 1995 | HNRNPF Heterogeneous nuclear ribonucleoprotein F                        | IPI00003881                                     | 45,653.80  | 99  | 114 | HSGPNSADSANDGFVR     | K | L | 1,630.72 |
| 1996 | HNRNPH1 Heterogeneous nuclear ribonucleoprotein H                       | IPI00013881,IPI00479191                         | 49,211.80  | 99  | 114 | HTGPNPDTANDGFVR      | K | L | 1,684.77 |
| 1997 | HNRNPH1 Heterogeneous nuclear ribonucleoprotein H                       | IPI00013881,IPI00479191                         | 49,211.80  | 99  | 114 | HTGPNPDTANDGFVR      | K | L | 1,684.77 |
| 1998 | HNRNPH1 Heterogeneous nuclear ribonucleoprotein H                       | IPI00013881,IPI00479191                         | 49,211.80  | 99  | 114 | HTGPNPDTANDGFVR      | K | L | 1,684.77 |
| 1999 | HNRNPH1 Heterogeneous nuclear ribonucleoprotein H                       | IPI00013881,IPI00479191                         | 49,211.80  | 99  | 114 | HTGPNPDTANDGFVR      | K | L | 1,684.77 |
| 2000 | HNRNPH1 Heterogeneous nuclear ribonucleoprotein H                       | IPI00013881,IPI00479191                         | 49,211.80  | 99  | 114 | HTGPNPDTANDGFVR      | K | L | 1,684.77 |
| 2001 | HNRNPH1 Heterogeneous nuclear ribonucleoprotein H                       | IPI00013881,IPI00479191                         | 49,211.80  | 99  | 114 | HTGPNPDTANDGFVR      | K | L | 1,684.77 |
| 2002 | HNRNPH2 Heterogeneous nuclear ribonucleoprotein H2                      | IPI00026230                                     | 49,246.10  | 99  | 114 | HTGPNPDTANDGFVR      | K | L | 1,684.77 |
| 2003 | HNRNPH2 Heterogeneous nuclear ribonucleoprotein H2                      | IPI00026230                                     | 49,246.10  | 99  | 114 | HTGPNPDTANDGFVR      | K | L | 1,684.77 |
| 2004 | ARL5B ADP-ribosylation factor-like protein 5B                           | IPI00102036                                     | 20,357.10  | 99  | 108 | LAITKEELYR           | R | M | 1,235.70 |
| 2005 | AIFM1 Isoform 1 of Apoptosis-inducing factor 1, mitochondrial           | IPI00000690,IPI00157908                         | 66,883.50  | 99  | 109 | ISGLGLTPEQK          | R | Q | 1,142.64 |
| 2006 | RPS8 40S ribosomal protein S8                                           | IPI00216587,IPI00872430                         | 24,188.40  | 99  | 110 | NCIVLIDSTPYR         | K | Q | 1,450.74 |
| 2007 | RPS8 40S ribosomal protein S8                                           | IPI00216587,IPI00872430                         | 24,188.40  | 99  | 110 | NCIVLIDSTPYR         | K | Q | 1,450.74 |
| 2008 | RPS7 40S ribosomal protein S7                                           | IPI00013415                                     | 22,109.50  | 99  | 107 | RILPKPTRK            | R | S | 1,108.73 |
| 2009 | SAE1 SUMO-activating enzyme subunit 1                                   | IPI00033130,IPI00640965,IPI00647006             | 38,432.10  | 99  | 109 | AQNLNPMVDVK          | R | V | 1,244.63 |
| 2010 | SAE1 SUMO-activating enzyme subunit 1                                   | IPI00033130,IPI00640965,IPI00647006             | 38,432.10  | 99  | 109 | AQNLNPMVDVK          | R | V | 1,244.63 |
| 2011 | PREP Prolyl endopeptidase                                               | IPI00008164                                     | 80,683.50  | 99  | 111 | VLYVQDSLEGEAR        | R | V | 1,478.75 |
| 2012 | GDI1 Rab GDP dissociation inhibitor alpha                               | IPI00010154,IPI00910113                         | 50,566.10  | 99  | 103 | YLDFK                | R | V | 685.3556 |
| 2013 | NONO Non-POU domain-containing octamer-binding protein                  | IPI00304596                                     | 54,213.60  | 100 | 107 | AGEVFIHK             | K | D | 900.4938 |
| 2014 | C10orf58 Uncharacterized protein C10orf58                               | IPI00296190,IPI00646289,IPI00646889             | 25,747.50  | 100 | 114 | SMLDQLGVPLYAVVK      | K | E | 1,648.90 |
| 2015 | NONO Non-POU domain-containing octamer-binding protein                  | IPI00304596                                     | 54,213.60  | 100 | 109 | AGEVFIHKDK           | K | G | 1,143.62 |
| 2016 | ILKAP Integrin-linked kinase-associated serine/threonine phosphatase 2C | IPI00006164                                     | 42,889.20  | 100 | 108 | ASSVIFGLK            | K | G | 921.5404 |
| 2017 | PFDN2 Prefoldin subunit 2                                               | IPI00006052                                     | 16,629.80  | 100 | 111 | IETLTQQLQAK          | K | G | 1,385.80 |
| 2018 | HNRNPA2B1 43 kDa protein                                                | IPI00874030                                     | 43,234.30  | 100 | 107 | NYEQWGK              | R | L | 1,087.48 |
| 2019 | ARF4 ADP-ribosylation factor 4                                          | IPI00215918                                     | 20,493.60  | 100 | 109 | IQEVADELQK           | R | M | 1,172.62 |
| 2020 | ANP32E Acidic leucine-rich nuclear phosphoprotein 32 family member E    | IPI00165393                                     | 30,675.30  | 100 | 113 | IKDLSTVEALQNLK       | K | N | 1,571.90 |
| 2021 | RPL12 Isoform 1 of 60S ribosomal protein L12                            | IPI00024933                                     | 17,801.10  | 100 | 114 | HSGNITFDEIVNIAR      | K | Q | 1,685.86 |
| 2022 | PSMB3 Proteasome subunit beta type-3                                    | IPI00028004                                     | 22,931.60  | 100 | 115 | FGPYYTEPVIAGLDPK     | R | T | 1,766.90 |
| 2023 | TNPO1 transportin 1 isoform 1                                           | IPI00024364,IPI00843876                         | 102,340.80 | 101 | 115 | SECLNIGDSSPLIR       | K | A | 1,674.81 |

|      |                                                                      |                                                                                                 |           |     |     |                      |   |   |          |
|------|----------------------------------------------------------------------|-------------------------------------------------------------------------------------------------|-----------|-----|-----|----------------------|---|---|----------|
| 2024 | COMMD4 Isoform 1 of COMM domain-containing protein 4                 | IPI00413500,IPI00852907                                                                         | 21,746.70 | 101 | 108 | EHAASLCR             | K | C | 943.4414 |
| 2025 | HIST3H2BB Histone H2B type 3-B                                       | IPI00166293                                                                                     | 13,890.60 | 101 | 109 | LLLPGELAK            | R | H | 953.6032 |
| 2026 | H2BFS Histone H2B type F-S                                           | IPI00477495,IPI00816252                                                                         | 13,926.60 | 101 | 109 | LLLPGELAK            | R | H | 953.6032 |
| 2027 | H2BFS Histone H2B type F-S                                           | IPI00477495,IPI00816252                                                                         | 13,926.60 | 101 | 109 | LLLPGELAK            | R | H | 953.6032 |
| 2028 | H2BFS Histone H2B type F-S                                           | IPI00477495,IPI00816252                                                                         | 13,926.60 | 101 | 109 | LLLPGELAK            | R | H | 953.6032 |
| 2029 | HIST1H2BJ Histone H2B type 1-J                                       | IPI00515061                                                                                     | 13,886.70 | 101 | 109 | LLLPGELAK            | R | H | 953.6032 |
| 2030 | XRCC6 ATP-dependent DNA helicase 2 subunit 1                         | IPI00644712                                                                                     | 69,828.40 | 101 | 115 | NIYVLQELDNPGAKR      | K | I | 1,729.92 |
| 2031 | - cDNA FLJ54408, highly similar to Heat shock 70 kDa protein 1       | IPI00911039                                                                                     | 63,907.90 | 101 | 116 | QATKDAGVIAGLNVLR     | R | I | 1,625.93 |
| 2032 | HIST1H2AB;HIST1H2AE Histone H2A type 1-B/E                           | IPI00026272,IPI00031562,IPI00216456                                                             | 14,118.00 | 101 | 119 | VTIAQGGVLPNIQAVLLPK  | R | K | 1,931.17 |
| 2033 | HIST1H2AB;HIST1H2AE Histone H2A type 1-B/E                           | IPI00026272,IPI00031562,IPI00216456                                                             | 14,118.00 | 101 | 119 | VTIAQGGVLPNIQAVLLPK  | R | K | 1,931.17 |
| 2034 | HIST1H2AB;HIST1H2AE Histone H2A type 1-B/E                           | IPI00026272,IPI00031562,IPI00216456                                                             | 14,118.00 | 101 | 119 | VTIAQGGVLPNIQAVLLPK  | R | K | 1,931.17 |
| 2035 | HIST1H2AH Histone H2A type 1-H                                       | IPI00081836,IPI00216457,IPI00220855,IPI00255316,IPI00291764,IPI00339274,IPI00552873,IPI00902514 | 13,888.80 | 101 | 119 | VTIAQGGVLPNIQAVLLPK  | K | K | 1,931.17 |
| 2036 | HIST1H2AH Histone H2A type 1-H                                       | IPI00081836,IPI00216457,IPI00220855,IPI00255316,IPI00291764,IPI00339274,IPI00552873,IPI00902514 | 13,888.80 | 101 | 119 | VTIAQGGVLPNIQAVLLPK  | K | K | 1,931.17 |
| 2037 | MAP2K2 Dual specificity mitogen-activated protein kinase kinase 2    | IPI00003783                                                                                     | 44,407.20 | 101 | 112 | KLIHLEIKPAIR         | R | N | 1,430.92 |
| 2038 | SNAP23 Isoform SNAP-23a of Synaptosomal-associated protein 23        | IPI00010438                                                                                     | 23,336.80 | 101 | 117 | TTWGDGGENSPCNVVS     | K | Q | 1,807.79 |
| 2039 | XRCC6 ATP-dependent DNA helicase 2 subunit 1                         | IPI00644712                                                                                     | 69,828.40 | 101 | 114 | NIYVLQELDNPGAK       | K | R | 1,573.82 |
| 2040 | HIST1H2AB;HIST1H2AE Histone H2A type 1-B/E                           | IPI00026272,IPI00031562,IPI00216456                                                             | 14,118.00 | 101 | 120 | VTIAQGGVLPNIQAVLLPKK | R | T | 2,059.26 |
| 2041 | HIST1H2AH Histone H2A type 1-H                                       | IPI00081836,IPI00216457,IPI00220855,IPI00255316,IPI00291764,IPI00339274,IPI00552873,IPI00902514 | 13,888.80 | 101 | 120 | VTIAQGGVLPNIQAVLLPKK | K | T | 2,059.26 |
| 2042 | GRB2 Isoform 1 of Growth factor receptor-bound protein 2             | IPI00021327                                                                                     | 25,188.80 | 101 | 109 | FGNDVQHFK            | K | V | 1,091.53 |
| 2043 | RPL21;LOC729402 60S ribosomal protein L21                            | IPI00247583,IPI00887074,IPI00888913                                                             | 18,547.00 | 101 | 108 | SRDSFLKR             | K | V | 1,008.56 |
| 2044 | LY6G5B;CSNK2B Casein kinase II subunit beta                          | IPI00010865,IPI00640088                                                                         | 24,924.90 | 101 | 111 | YQQGDFGYCPR          | K | V | 1,390.58 |
| 2045 | METTL11A Chromosome 9 open reading frame 32                          | IPI00515040,IPI00549389                                                                         | 15,878.80 | 102 | 110 | TYLGEEGKR            | K | A | 1,052.54 |
| 2046 | RPS12 40S ribosomal protein S12                                      | IPI00013917,IPI00847579                                                                         | 14,507.70 | 102 | 112 | KVVGCSCVVVK          | R | D | 1,234.66 |
| 2047 | SUB1 Activated RNA polymerase II transcriptional coactivator p15     | IPI00221222                                                                                     | 14,377.90 | 102 | 114 | GISLNPEQWSQLK        | K | E | 1,499.79 |
| 2048 | PDRG1 p53 and DNA damage-regulated protein 1                         | IPI00027887                                                                                     | 15,493.60 | 102 | 112 | LFEAQGKPELK          | R | G | 1,259.70 |
| 2049 | PCBP2 poly(rC) binding protein 2 isoform b                           | IPI00012066,IPI00790627                                                                         | 38,204.50 | 102 | 115 | LVPASQCGSLIGK        | R | G | 1,428.79 |
| 2050 | PCBP2 poly(rC) binding protein 2 isoform b                           | IPI00012066,IPI00790627                                                                         | 38,204.50 | 102 | 115 | LVPASQCGSLIGK        | R | G | 1,428.79 |
| 2051 | PCBP1 Poly(rC)-binding protein 1                                     | IPI00016610                                                                                     | 37,480.20 | 102 | 115 | LVPATQCGSLIGK        | R | G | 1,442.80 |
| 2052 | PCBP1 Poly(rC)-binding protein 1                                     | IPI00016610                                                                                     | 37,480.20 | 102 | 115 | LVPATQCGSLIGK        | R | G | 1,442.80 |
| 2053 | PCBP1 Poly(rC)-binding protein 1                                     | IPI00016610                                                                                     | 37,480.20 | 102 | 115 | LVPATQCGSLIGK        | R | G | 1,442.80 |
| 2054 | PCBP1 Poly(rC)-binding protein 1                                     | IPI00016610                                                                                     | 37,480.20 | 102 | 115 | LVPATQCGSLIGK        | R | G | 1,442.80 |
| 2055 | DDX3X ATP-dependent RNA helicase DDX3X                               | IPI00215637                                                                                     | 73,227.70 | 102 | 110 | SDYDGIGSR            | R | G | 969.4273 |
| 2056 | UBE2S Ubiquitin-conjugating enzyme E2 S                              | IPI00217949                                                                                     | 23,828.40 | 102 | 110 | DWTAELGIR            | R | H | 1,060.54 |
| 2057 | UBE2S Ubiquitin-conjugating enzyme E2 S                              | IPI00217949                                                                                     | 23,828.40 | 102 | 110 | DWTAELGIR            | R | H | 1,060.54 |
| 2058 | RPL10 60S ribosomal protein L10                                      | IPI00554723,IPI00646899,IPI00853161                                                             | 24,586.60 | 102 | 110 | MLSCAGADR            | K | L | 996.4238 |
| 2059 | ANP32E Acidic leucine-rich nuclear phosphoprotein 32 family member E | IPI00165393                                                                                     | 30,675.30 | 102 | 113 | DLSTVEALQNLK         | K | N | 1,330.72 |
| 2060 | MAP2K2 Dual specificity mitogen-activated protein kinase kinase 2    | IPI00003783                                                                                     | 44,407.20 | 102 | 112 | LIHLEIKPAIR          | K | N | 1,302.83 |
| 2061 | POLR2E DNA-directed RNA polymerases I, II, and III subunit RPABC1    | IPI00291093                                                                                     | 24,533.40 | 102 | 115 | ALIVVQQGMTPSAK       | R | Q | 1,458.80 |
| 2062 | TKT cDNA FLJ54957, highly similar to Transketolase                   | IPI00643920                                                                                     | 68,725.40 | 102 | 114 | KISSDLDGHPVVK        | R | Q | 1,392.75 |
| 2063 | RPL22 60S ribosomal protein L22                                      | IPI00219153,IPI00878392                                                                         | 14,769.30 | 102 | 113 | VVANSKESYELR         | R | Y | 1,394.73 |
| 2064 | PRDX5 Isoform Mitochondrial of Peroxiredoxin-5, mitochondrial        | IPI00024915,IPI00759663,IPI00876999                                                             | 22,008.30 | 103 | 116 | THLPGFVEQAEALK       | K | A | 1,539.82 |
| 2065 | HSPA1A;HSPA1B Heat shock 70 kDa protein 1                            | IPI00304925                                                                                     | 70,036.00 | 103 | 112 | VQVSYKGETK           | K | A | 1,138.61 |
| 2066 | HSPA1A;HSPA1B Heat shock 70 kDa protein 1                            | IPI00304925                                                                                     | 70,036.00 | 103 | 112 | VQVSYKGETK           | K | A | 1,138.61 |
| 2067 | NOC4L Nucleolar complex protein 4 homolog                            | IPI00031661                                                                                     | 58,451.40 | 103 | 115 | LGELLGHPSFQVK        | R | E | 1,424.79 |

|      |                                                                                                    |                                                 |           |     |     |                     |   |   |          |
|------|----------------------------------------------------------------------------------------------------|-------------------------------------------------|-----------|-----|-----|---------------------|---|---|----------|
| 2068 | HSPA5 HSPA5 protein                                                                                | IPI00003362                                     | 72,405.60 | 103 | 114 | TWNDPSVQQDIK        | R | F | 1,430.69 |
| 2069 | HSP90B1 Endoplasmic                                                                                | IPI00027230                                     | 92,453.70 | 103 | 114 | ELISNASDALDK        | R | I | 1,275.64 |
| 2070 | FN3KRP Ketosamine-3-kinase                                                                         | IPI00099986                                     | 34,394.70 | 103 | 115 | LGAQLADLHLDNK       | K | K | 1,407.76 |
| 2071 | HSP90B1 Endoplasmic                                                                                | IPI00027230                                     | 92,453.70 | 103 | 116 | ELISNASDALDKIR      | R | L | 1,544.83 |
| 2072 | RAC1 Isoform A of Ras-related C3 botulinum toxin substrate 1                                       | IPI00010271,IPI00219675                         | 21,432.60 | 103 | 116 | HHCNPNTPIILVGTK     | R | L | 1,586.85 |
| 2073 | UAP1 Isoform AGX2 of UDP-N-acetylhexosamine pyrophosphorylase                                      | IPI00000684,IPI00217816,IPI00607787,IPI00646967 | 58,751.50 | 103 | 115 | VAVLLLAGGQGTR       | K | L | 1,254.75 |
| 2074 | MORF4L2 Mortality factor 4-like protein 2                                                          | IPI00014174                                     | 32,290.70 | 103 | 118 | ARADPTVESEEFKNR     | R | M | 1,819.89 |
| 2075 | PGRMC2 Membrane-associated progesterone receptor component 2                                       | IPI00005202                                     | 26,152.90 | 103 | 121 | GLGAGAGAGEESPATSLPR | R | M | 1,697.85 |
| 2076 | RPS19 40S ribosomal protein S19                                                                    | IPI00215780                                     | 16,042.50 | 103 | 111 | VLQALEGLK           | R | M | 970.5933 |
| 2077 | SNRPD2 Small nuclear ribonucleoprotein Sm D2                                                       | IPI00017963                                     | 13,509.10 | 103 | 111 | GDSVIVVLR           | R | N | 957.5728 |
| 2078 | RPS25 40S ribosomal protein S25                                                                    | IPI00012750                                     | 13,725.00 | 103 | 111 | HRAQVIYTR           | K | N | 1,143.64 |
| 2079 | TKT cDNA FLJ54957, highly similar to Transketolase                                                 | IPI00643920                                     | 68,725.40 | 103 | 114 | ISSDLDGHPVPK        | K | Q | 1,264.65 |
| 2080 | RFC5 Replication factor C subunit 5                                                                | IPI00031514,IPI00373883                         | 38,480.40 | 103 | 112 | GPILSFASTR          | R | T | 1,048.58 |
| 2081 | CTPS CTP synthase 1                                                                                | IPI00290142                                     | 66,672.70 | 103 | 109 | KGDYLGK             | R | T | 780.4252 |
| 2082 | RPL21;LOC729402 60S ribosomal protein L21                                                          | IPI00247583,IPI00887074,IPI00888913             | 18,547.00 | 103 | 108 | DSFLKR              | R | V | 765.4254 |
| 2083 | GDI2 cDNA FLJ60299, highly similar to Rab GDP dissociation inhibitor beta                          | IPI00031461                                     | 51,138.50 | 103 | 107 | YLDFK               | R | V | 685.3556 |
| 2084 | GDI2 cDNA FLJ60299, highly similar to Rab GDP dissociation inhibitor beta                          | IPI00031461                                     | 51,138.50 | 103 | 107 | YLDFK               | R | V | 685.3556 |
| 2085 | LAGE3 L antigen family member 3                                                                    | IPI00032314                                     | 14,785.70 | 103 | 107 | ILVVR               | R | W | 599.4239 |
| 2086 | SFRS11 Splicing factor, arginine/serine-rich 11                                                    | IPI00464952,IPI00641287,IPI00641957             | 53,525.70 | 104 | 120 | ALIVVPYAEGVIPDEAK   | R | A | 1,783.98 |
| 2087 | ENO2 Gamma-enolase                                                                                 | IPI00216171                                     | 47,251.70 | 104 | 120 | SKFGANAILGVSLAVCK   | K | A | 1,734.96 |
| 2088 | ENO1 Isoform alpha-enolase of Alpha-enolase                                                        | IPI00465248                                     | 47,152.20 | 104 | 120 | SKFGANAILGVSLAVCK   | K | A | 1,734.96 |
| 2089 | EMD Emerin                                                                                         | IPI00032003                                     | 28,976.90 | 104 | 115 | TYGEPESAGPSR        | R | A | 1,250.56 |
| 2090 | TUBB2C Tubulin beta-2C chain                                                                       | IPI00007752                                     | 49,812.70 | 104 | 122 | GHYTEGAELVDSVLDVVRK | K | E | 2,087.08 |
| 2091 | TUBB Tubulin beta chain                                                                            | IPI00011654                                     | 49,652.60 | 104 | 122 | GHYTEGAELVDSVLDVVRK | K | E | 2,087.08 |
| 2092 | TUBB2A Tubulin beta-2A chain                                                                       | IPI00013475,IPI00031370                         | 49,889.10 | 104 | 122 | GHYTEGAELVDSVLDVVRK | K | E | 2,087.08 |
| 2093 | EIF2S3 Eukaryotic translation initiation factor 2 subunit 3                                        | IPI00297982                                     | 51,092.20 | 104 | 121 | SCGSSTPDEFPTDIPGTK  | R | G | 1,895.83 |
| 2094 | CSNK1E Casein kinase I isoform epsilon                                                             | IPI00027729                                     | 47,299.00 | 104 | 115 | TVLLADQMISR         | K | I | 1,375.76 |
| 2095 | TUBB2C Tubulin beta-2C chain                                                                       | IPI00007752                                     | 49,812.70 | 104 | 121 | GHYTEGAELVDSVLDVVR  | K | K | 1,958.98 |
| 2096 | TUBB Tubulin beta chain                                                                            | IPI00011654                                     | 49,652.60 | 104 | 121 | GHYTEGAELVDSVLDVVR  | K | K | 1,958.98 |
| 2097 | TUBB2A Tubulin beta-2A chain                                                                       | IPI00013475,IPI00031370                         | 49,889.10 | 104 | 121 | GHYTEGAELVDSVLDVVR  | K | K | 1,958.98 |
| 2098 | RPL13A 60S ribosomal protein L13a                                                                  | IPI00304612,IPI00398964                         | 23,559.90 | 104 | 115 | VFDGIPPPYDKK        | K | K | 1,375.73 |
| 2099 | MCTS1 Isoform 1 of Malignant T cell amplified sequence 1                                           | IPI00179026                                     | 20,537.90 | 104 | 122 | FVLSGANIMCPGLTSPGAK | K | L | 1,935.97 |
| 2100 | MCTS1 Isoform 1 of Malignant T cell amplified sequence 1                                           | IPI00179026                                     | 20,537.90 | 104 | 122 | FVLSGANIMCPGLTSPGAK | K | L | 1,935.97 |
| 2101 | RPL13 60S ribosomal protein L13                                                                    | IPI00465361                                     | 24,244.20 | 104 | 116 | NKSTESLQANVQR       | R | L | 1,474.76 |
| 2102 | MORF4L1 cDNA FLJ38504 fis, clone HCHON2000156, highly similar to Mortality factor 4-like protein 1 | IPI00550968                                     | 40,011.50 | 104 | 113 | ANQEYQAEK           | K | M | 1,137.52 |
| 2103 | HEBP1 Heme-binding protein 1                                                                       | IPI00148063                                     | 21,079.40 | 104 | 118 | IPNQFQSDPPAPSDK     | R | S | 1,640.79 |
| 2104 | OCIAD1 Isoform 1 of OCIA domain-containing protein 1                                               | IPI00016405                                     | 27,608.80 | 104 | 115 | KLENSPLGEALR        | K | S | 1,326.74 |
| 2105 | PDLIM1 PDZ and LIM domain protein 1                                                                | IPI00010414                                     | 36,053.30 | 104 | 122 | MNLASEPQEVHLIGSAHNR | K | S | 2,103.04 |
| 2106 | HSD17B12 Estradiol 17-beta-dehydrogenase 12                                                        | IPI00007676                                     | 34,307.40 | 104 | 119 | TIAVDFASEDIDYDKIK   | R | T | 1,827.94 |
| 2107 | YWHAQ 14-3-3 protein theta                                                                         | IPI00018146                                     | 27,747.40 | 104 | 115 | YLIANATNPESK        | K | V | 1,320.68 |
| 2108 | RPS14 40S ribosomal protein S14                                                                    | IPI00026271                                     | 16,254.90 | 105 | 117 | TKTPGPGAQSALR       | R | A | 1,283.71 |
| 2109 | ANXA2P2 Putative annexin A2-like protein                                                           | IPI00334627,IPI00455315                         | 38,642.90 | 105 | 115 | TPAQYDASELK         | K | A | 1,222.60 |
| 2110 | RHOC Rho-related GTP-binding protein RhoC                                                          | IPI00027434,IPI00647268                         | 21,988.70 | 105 | 119 | HFCPNVPIILVGNKK     | K | D | 1,735.97 |
| 2111 | RFC4 Replication factor C subunit 4                                                                | IPI00017381,IPI00792595                         | 39,664.50 | 105 | 114 | VLELNASDER          | R | G | 1,145.58 |

|      |                                                                                           |                                                 |            |     |     |                            |   |   |          |
|------|-------------------------------------------------------------------------------------------|-------------------------------------------------|------------|-----|-----|----------------------------|---|---|----------|
| 2112 | - cDNA FLJ54408, highly similar to Heat shock 70 kDa protein 1                            | IPI00911039                                     | 63,907.90  | 105 | 116 | DAGVIAGLNVLR               | K | I | 1,197.70 |
| 2113 | PSMA6 Proteasome subunit alpha type-6                                                     | IPI00029623                                     | 27,381.50  | 105 | 117 | YGYEIPVDMCKR               | K | I | 1,643.79 |
| 2114 | TCEA1 Isoform 1 of Transcription elongation factor A protein 1                            | IPI00333215                                     | 33,952.60  | 105 | 116 | EESTSSGNVSNR               | R | K | 1,266.56 |
| 2115 | RAB8A Ras-related protein Rab-8A                                                          | IPI00028481                                     | 23,651.60  | 105 | 116 | NIEEHASADVEK               | R | M | 1,341.63 |
| 2116 | DUSP3 Dual specificity protein phosphatase 3                                              | IPI00018671,IPI00790757                         | 20,460.80  | 105 | 116 | AADFIDQALAQK               | R | N | 1,290.67 |
| 2117 | RPS25 40S ribosomal protein S25                                                           | IPI00012750                                     | 13,725.00  | 105 | 111 | AQVIYTR                    | R | N | 850.4781 |
| 2118 | RPS25 40S ribosomal protein S25                                                           | IPI00012750                                     | 13,725.00  | 105 | 111 | AQVIYTR                    | R | N | 850.4781 |
| 2119 | ARCN1 Putative uncharacterized protein DKFZp686M09245                                     | IPI00298520,IPI00514053                         | 61,581.40  | 105 | 113 | LYMVLITTK                  | K | N | 1,097.63 |
| 2120 | EIF4G2 cDNA FLJ59571, highly similar to Eukarvotic translation initiation factor 4gamma 2 | IPI00015952                                     | 110,247.70 | 105 | 114 | TAGNSEFLGK                 | K | T | 1,023.51 |
| 2121 | MID1 Isoform 1 of Midline-1                                                               | IPI00029324,IPI00219026,IPI00647754             | 75,233.30  | 105 | 116 | AFDANTMTSAEK               | R | V | 1,301.57 |
| 2122 | C16orf80 UPF0468 protein C16orf80                                                         | IPI00001655                                     | 22,757.60  | 105 | 113 | ASNYQSTTR                  | R | V | 1,027.48 |
| 2123 | ENO2 Gamma-enolase                                                                        | IPI00216171                                     | 47,251.70  | 106 | 120 | FGANAILGVSLAVCK            | K | A | 1,519.83 |
| 2124 | ENO1 Isoform alpha-enolase of Alpha-enolase                                               | IPI00465248                                     | 47,152.20  | 106 | 120 | FGANAILGVSLAVCK            | K | A | 1,519.83 |
| 2125 | ENO1 Isoform alpha-enolase of Alpha-enolase                                               | IPI00465248                                     | 47,152.20  | 106 | 120 | FGANAILGVSLAVCK            | K | A | 1,519.83 |
| 2126 | NT5C3 Isoform 3 of Cytosolic 5'-nucleotidase 3                                            | IPI00100192,IPI00619911,IPI00647805,IPI00807412 | 32,672.60  | 106 | 117 | SHGLLVQQALPK               | K | A | 1,290.75 |
| 2127 | PHF19 Isoform 2 of PHD finger protein 19                                                  | IPI00152220,IPI00157837,IPI00743344,IPI00879928 | 22,494.10  | 106 | 118 | TSGPLNEILICGK              | K | C | 1,401.74 |
| 2128 | PGRMC1 Membrane-associated progesterone receptor component 1                              | IPI00220739                                     | 21,654.20  | 106 | 119 | FYGPPEPGYVFAGR             | K | D | 1,516.72 |
| 2129 | MAGOHB Protein mago nashi homolog 2                                                       | IPI00059292                                     | 17,258.60  | 106 | 116 | IGSLIDVNQSK                | K | D | 1,173.65 |
| 2130 | HNRNPA1 Isoform A1-B of Heterogeneous nuclear ribonucleoprotein A1                        | IPI00215965,IPI00465365                         | 38,828.10  | 106 | 122 | KIFVGGIKEDTEEHHLR          | K | D | 2,008.06 |
| 2131 | HNRNPA1 Isoform A1-B of Heterogeneous nuclear ribonucleoprotein A1                        | IPI00215965,IPI00465365                         | 38,828.10  | 106 | 113 | KIFVGGIK                   | K | E | 861.5558 |
| 2132 | NP cDNA FLJ25678 fis, clone TST04067, highly similar to PURINE NUCLEOSIDE PHOSPHORYLASE   | IPI00017672,IPI00871140                         | 32,533.50  | 106 | 127 | VFHLLGVDTLVVTNAAGGLNP<br>K | R | F | 2,235.25 |
| 2133 | NME3 Nucleoside diphosphate kinase 3                                                      | IPI00012315                                     | 18,997.20  | 106 | 122 | ALIGATNPADAPPGTIR          | R | G | 1,634.89 |
| 2134 | - cDNA FLJ54554, highly similar to Pyruvate kinase isozymes M1/M2                         | IPI00910979                                     | 56,255.30  | 106 | 121 | TGLIKSGTAEVELKK            | R | G | 1,630.94 |
| 2135 | TUBA1A Tubulin alpha-1A chain                                                             | IPI00180675                                     | 50,117.70  | 106 | 121 | GHYTIGKEIIDLVDR            | R | I | 1,842.01 |
| 2136 | TUBA1C Tubulin alpha-1C chain                                                             | IPI00218343                                     | 49,877.40  | 106 | 121 | GHYTIGKEIIDLVDR            | R | I | 1,842.01 |
| 2137 | TUBA1B Tubulin alpha-1B chain                                                             | IPI00387144,IPI00792677                         | 50,133.70  | 106 | 121 | GHYTIGKEIIDLVDR            | R | I | 1,842.01 |
| 2138 | NUDC Nuclear migration protein nudC                                                       | IPI00550746                                     | 38,225.70  | 106 | 114 | ELTDEEAER                  | K | L | 1,091.49 |
| 2139 | NME2 Nucleoside diphosphate kinase B                                                      | IPI00026260                                     | 17,280.20  | 106 | 114 | GDFCIQVGR                  | R | N | 1,051.50 |
| 2140 | RPL10A 60S ribosomal protein L10a                                                         | IPI00412579                                     | 24,814.00  | 106 | 118 | KYDAFLASESLIK              | K | Q | 1,484.80 |
| 2141 | UCHL1 Ubiquitin carboxyl-terminal hydrolase isozyme L1                                    | IPI00018352                                     | 24,806.30  | 106 | 115 | LGFEDEGSVLK                | K | Q | 1,064.56 |
| 2142 | UBL4A Ubiquitin-like protein 4A                                                           | IPI00005658                                     | 17,758.90  | 106 | 114 | HFSAADASR                  | R | V | 961.4485 |
| 2143 | PHB Prohibitin                                                                            | IPI00017334,IPI00791634                         | 29,786.60  | 106 | 117 | IFTSIGEDYDER               | R | V | 1,444.66 |
| 2144 | MAGOHB Protein mago nashi homolog 2                                                       | IPI00059292                                     | 17,258.60  | 106 | 122 | IGSLIDVNQSKDPEGLR          | K | V | 1,840.98 |
| 2145 | SDSL Serine dehydratase-like                                                              | IPI00062419,IPI00790728,IPI00796370             | 34,655.20  | 106 | 118 | LQGEAEVQLTGK               | R | V | 1,329.70 |
| 2146 | HNRNPA0 Heterogeneous nuclear ribonucleoprotein A0                                        | IPI00011913                                     | 30,822.50  | 107 | 126 | GDVAEGDLIEHFSQFGTVEK       | K | A | 2,178.04 |
| 2147 | CCT7 T-complex protein 1 subunit eta                                                      | IPI00018465                                     | 59,349.80  | 107 | 123 | QVKPYVEEGLHPQIIR           | K | A | 2,019.14 |
| 2148 | RPS14 40S ribosomal protein S14                                                           | IPI00026271                                     | 16,254.90  | 107 | 117 | TPGGAQSALR                 | K | A | 1,054.56 |
| 2149 | HNRNPA1 Isoform A1-B of Heterogeneous nuclear ribonucleoprotein A1                        | IPI00215965,IPI00465365                         | 38,828.10  | 107 | 122 | IFVGGIKEDTEEHHLR           | K | D | 1,879.97 |
| 2150 | TPI1 Isoform 1 of Triosephosphate isomerase                                               | IPI00465028                                     | 30,772.80  | 107 | 122 | VTNGAFTGEISPGMIK           | K | D | 1,637.82 |
| 2151 | PGK1 Phosphoglycerate kinase 1                                                            | IPI00169383                                     | 44,597.30  | 107 | 123 | ACANPAAGSVILLENLR          | K | F | 1,768.94 |
| 2152 | NAPA Alpha-soluble NSF attachment protein                                                 | IPI00009253                                     | 33,216.10  | 107 | 116 | AIEIYTMGR                  | R | F | 1,184.56 |
| 2153 | NAPA Alpha-soluble NSF attachment protein                                                 | IPI00009253                                     | 33,216.10  | 107 | 116 | AIEIYTMGR                  | R | F | 1,168.57 |

|      |                                                                           |                                                                                     |            |     |     |                        |   |          |
|------|---------------------------------------------------------------------------|-------------------------------------------------------------------------------------|------------|-----|-----|------------------------|---|----------|
| 2154 | CROP Isoform 1 of Cisplatin resistance-associated overexpressed protein   | IPi00107745                                                                         | 51,449.10  | 107 | 128 | LALSQNQQSSGAAGPTGKNE R | I | 2,215.10 |
| 2155 | GUK1 Guanylate kinase 1                                                   | IPi00514494,IPi00515106,IPi00644488                                                 | 23,479.80  | 107 | 117 | VAVQAVQAMNR            | K | 1,186.64 |
| 2156 | RPL7 60S ribosomal protein L7                                             | IPi00030179,IPi00472171,IPi00871827                                                 | 29,209.70  | 107 | 113 | KVLQLLR                | R | 869.5932 |
| 2157 | CMPK1 cytidine monophosphate (UMP-CMP) kinase 1, cytosolic isoform a      | IPi00219953                                                                         | 25,837.80  | 107 | 118 | EMDQTMANAQK            | R | 1,353.58 |
| 2158 | IRGQ Immunity-related GTPase family Q protein                             | IPi00103925                                                                         | 62,700.50  | 107 | 114 | GTPLLAVR               | R | 826.5146 |
| 2159 | ACTR2 Actin-related protein 2                                             | IPi00005159                                                                         | 44,743.70  | 107 | 118 | ILLTEPPMNPTK           | K | 1,369.74 |
| 2160 | CROP Isoform 1 of Cisplatin resistance-associated overexpressed protein   | IPi00107745                                                                         | 51,449.10  | 107 | 124 | LALSQNQQSSGAAGPTGK     | R | 1,714.87 |
| 2161 | LDHA Isoform 1 of L-lactate dehydrogenase A chain                         | IPi00217966                                                                         | 36,671.20  | 107 | 112 | LNLVQR                 | R | 742.457  |
| 2162 | TBCB Tubulin folding cofactor B                                           | IPi00293126                                                                         | 27,307.50  | 107 | 117 | YTISQEAYDQR            | K | 1,373.63 |
| 2163 | RPS3 40S ribosomal protein S3                                             | IPi00011253                                                                         | 26,670.50  | 107 | 116 | YKLLGGLAVR             | R | 1,089.68 |
| 2164 | TBCB Tubulin folding cofactor B                                           | IPi00293126                                                                         | 27,307.50  | 107 | 122 | YTISQEAYDQRQDQTVR      | K | 1,972.94 |
| 2165 | SFRS12 Isoform 1 of Splicing factor, arginine/serine-rich 12              | IPi00103497,IPi00375462                                                             | 59,364.20  | 108 | 121 | FAFVEFADQNSVPR         | R | 1,626.79 |
| 2166 | SARS Seryl-tRNA synthetase, cytoplasmic                                   | IPi00220637,IPi00514587                                                             | 58,760.60  | 108 | 116 | LLIDEAILK              | R | 1,027.64 |
| 2167 | ATP6V1H Isoform 1 of V-type proton ATPase subunit H                       | IPi00296191,IPi00414079,IPi00909198                                                 | 55,865.40  | 108 | 116 | VSIFFDYAR              | R | 1,117.57 |
| 2168 | G3BP1 Ras GTPase-activating protein-binding protein 1                     | IPi00012442                                                                         | 52,144.80  | 108 | 123 | FMQTFVLAPEGSVANK       | R | 1,754.88 |
| 2169 | G3BP1 Ras GTPase-activating protein-binding protein 1                     | IPi00012442                                                                         | 52,144.80  | 108 | 123 | FMQTFVLAPEGSVANK       | R | 1,738.88 |
| 2170 | PFKP 6-phosphofructokinase type C                                         | IPi00009790                                                                         | 85,579.40  | 108 | 117 | LKAACNLLQR             | R | 1,186.67 |
| 2171 | BRD2 Isoform 1 of Bromodomain-containing protein 2                        | IPi00014414,IPi00797929,IPi00893088,IPi00893622                                     | 88,045.30  | 108 | 115 | LGLPDYHK               | K | 942.5045 |
| 2172 | GDI2 cDNA FLJ60299, highly similar to Rab GDP dissociation inhibitor beta | IPi00031461                                                                         | 51,138.50  | 108 | 119 | VTEGSFVYKGGK           | K | 1,271.66 |
| 2173 | LDHB L-lactate dehydrogenase B chain                                      | IPi00219217                                                                         | 36,620.60  | 108 | 113 | LNLVQR                 | R | 742.457  |
| 2174 | HNRNPA2B1 43 kDa protein                                                  | IPi00874030                                                                         | 43,234.30  | 108 | 120 | LTDCVVMRDPASK          | K | 1,491.73 |
| 2175 | HNRNPA2B1 43 kDa protein                                                  | IPi00874030                                                                         | 43,234.30  | 108 | 121 | LTDCVVMRDPASKR         | K | 1,647.83 |
| 2176 | DNAJC9 DnaJ homolog subfamily C member 9                                  | IPi00154975                                                                         | 29,892.30  | 108 | 118 | ISLEDIQAFEK            | K | 1,292.67 |
| 2177 | RPS17 40S ribosomal protein S17                                           | IPi00221093                                                                         | 15,532.50  | 108 | 129 | LLDFGSLSNLQVTQPTVGMN   | K | 2,425.24 |
| 2178 | PSMD13 proteasome 26S non-ATPase subunit 13 isoform 2                     | IPi00375380,IPi00549672                                                             | 42,924.90  | 108 | 117 | SSDEAVILCK             | K | 1,121.55 |
| 2179 | SPIN1 Spindlin-1                                                          | IPi00550655                                                                         | 29,582.50  | 108 | 117 | VSALEVLPR              | R | 1,098.62 |
| 2180 | TMUB1 Transmembrane and ubiquitin-like domain-containing protein 1        | IPi00027773                                                                         | 26,243.90  | 109 | 118 | FLNDSEQVAR             | K | 1,178.58 |
| 2181 | ALDOC Fructose-bisphosphate aldolase C                                    | IPi00418262                                                                         | 39,438.20  | 109 | 134 | VDKGVVPLAGTDGETTTQGL   | K | 2,615.32 |
| 2182 | SPEN Msx2-interacting protein                                             | IPi00045914                                                                         | 402,226.70 | 109 | 125 | DGLSER                 | R | 1,547.77 |
| 2183 | MCM6 DNA replication licensing factor MCM6                                | IPi00031517                                                                         | 92,872.60  | 109 | 120 | DFYVAFQDLPTR           | K | 1,471.72 |
| 2184 | PDCD10 Programmed cell death protein 10                                   | IPi00298558                                                                         | 24,684.50  | 109 | 116 | ALKQILSK               | R | 900.5878 |
| 2185 | ACSL3 Long-chain-fatty-acid--CoA ligase 3                                 | IPi00031397                                                                         | 80,405.10  | 109 | 122 | EVLNEEDEVQPNGK         | R | 1,599.75 |
| 2186 | AK1 Adenylate kinase isoenzyme 1                                          | IPi00018342,IPi00640817                                                             | 21,617.10  | 109 | 128 | IGQPTLLLYVDAGPETMTQR   | R | 2,219.14 |
| 2187 | FAM125A Isoform 1 of Multivesicular body subunit 12A                      | IPi00744702,IPi00788162                                                             | 28,766.10  | 109 | 123 | LLPLGATDTAVFDVR        | K | 1,587.87 |
| 2188 | RAB1B Ras-related protein Rab-1B                                          | IPi00008964,IPi00896425                                                             | 22,154.00  | 109 | 116 | YASENVNK               | R | 924.442  |
| 2189 | TPD52L2 Isoform 2 of Tumor protein D54                                    | IPi00221178,IPi00306825,IPi00399265,IPi00399266,IPi00399267,IPi00399268,IPi00743469 | 19,883.30  | 109 | 119 | TQETLSQAGQK            | K | 1,190.60 |
| 2190 | ANXA5 Annexin A5                                                          | IPi00329801,IPi00872379                                                             | 35,920.60  | 109 | 117 | VLTEIIASR              | K | 1,001.60 |
| 2191 | CGGBP1 CGG triplet repeat-binding protein 1                               | IPi00295585                                                                         | 18,802.20  | 110 | 120 | MCLEANIPLEK            | K | 1,333.65 |
| 2192 | DTWD2 DTW domain-containing protein 2                                     | IPi00168209                                                                         | 33,398.60  | 110 | 122 | TVLLAACL PQDK          | R | 1,425.78 |
| 2193 | ARF1 ADP-ribosylation factor 1                                            | IPi00215914,IPi00215917                                                             | 20,679.60  | 110 | 117 | MLAEDEL R              | R | 976.4769 |
| 2194 | CIAO1 Protein CIAO1                                                       | IPi00008791                                                                         | 37,820.90  | 110 | 125 | SVAWAPSGNLLATCSR       | K | 1,689.84 |
| 2195 | CIAO1 Protein CIAO1                                                       | IPi00008791                                                                         | 37,820.90  | 110 | 125 | SVAWAPSGNLLATCSR       | K | 1,689.84 |

|      |                                                                                                  |                                                             |           |     |     |                                |   |   |          |
|------|--------------------------------------------------------------------------------------------------|-------------------------------------------------------------|-----------|-----|-----|--------------------------------|---|---|----------|
| 2196 | CIAO1 Protein CIAO1                                                                              | IPI00008791                                                 | 37,820.90 | 110 | 125 | SVAWAPSGNLLATCSR               | K | D | 1,689.84 |
| 2197 | SRM Spermidine synthase                                                                          | IPI00292020                                                 | 33,806.50 | 110 | 135 | EVVKHPSVESVVQCEIDEDVI<br>QVSKK | R | F | 2,980.53 |
| 2198 | FEN1 Flap endonuclease 1                                                                         | IPI00026215                                                 | 42,576.20 | 110 | 125 | QLQQAQAAGAEQEVEK               | K | F | 1,727.86 |
| 2199 | PFKP 6-phosphofructokinase type C                                                                | IPI00009790                                                 | 85,579.40 | 110 | 117 | AACNLLQR                       | K | G | 945.4935 |
| 2200 | DCXR L-xylulose reductase                                                                        | IPI00448095,IPI00797249                                     | 25,894.20 | 110 | 120 | AVIQVSQIVAR                    | R | G | 1,183.72 |
| 2201 | PRDX2 Peroxiredoxin-2                                                                            | IPI00027350                                                 | 21,874.40 | 110 | 127 | RLSEDYGVLTDEGIAYR              | R | G | 2,085.06 |
| 2202 | TMEM205 Transmembrane protein 205                                                                | IPI00063130                                                 | 21,180.50 | 110 | 124 | TTAAMWALQTVEKER                | R | G | 1,734.88 |
| 2203 | HNRNPA3 Isoform 1 of Heterogeneous nuclear ribonucleoprotein A3                                  | IPI00419373                                                 | 39,577.10 | 110 | 127 | AVSREDSVKPGAHLTVKK             | R | I | 1,922.08 |
| 2204 | KIAA0174 Isoform 1 of Uncharacterized protein KIAA0174                                           | IPI00024660,IPI00386516,IPI00420088,IPI00643007             | 39,734.20 | 110 | 118 | LQSEVAELK                      | R | I | 1,016.56 |
| 2205 | TPD52 tumor protein D52 isoform 2                                                                | IPI00619951,IPI00619958,IPI00873344,IPI00896474             | 22,459.40 | 110 | 123 | ASAAFSSVSGSVITK                | K | K | 1,324.71 |
| 2206 | SRPRB Signal recognition particle receptor subunit beta                                          | IPI00295098                                                 | 29,685.10 | 110 | 125 | GNSLTLIDLPGHESLR               | R | L | 1,721.92 |
| 2207 | SNRNP70 Isoform 2 of U1 small nuclear ribonucleoprotein 70 kDa                                   | IPI00219483,IPI00290204                                     | 50,601.30 | 110 | 118 | VNYDTTESK                      | R | L | 1,056.48 |
| 2208 | TOMM34 Mitochondrial import receptor subunit TOM34                                               | IPI00009946                                                 | 34,542.30 | 110 | 127 | TVLQIDDNVTSAVEGINR             | K | M | 1,944.00 |
| 2209 | DNAJB1 DnaJ homolog subfamily B member 1                                                         | IPI00015947                                                 | 38,027.60 | 110 | 119 | NPFDTFFGQR                     | R | N | 1,228.57 |
| 2210 | MRFAP1 MORF4 family-associated protein 1                                                         | IPI00020915                                                 | 14,631.80 | 110 | 119 | MAEMLVELVR                     | K | R | 1,206.62 |
| 2211 | WDR82 WD repeat-containing protein 82                                                            | IPI00152695                                                 | 35,062.40 | 110 | 129 | VVALSMSPVDDTFISGSLDK           | R | T | 2,097.04 |
| 2212 | BUD31 Protein BUD31 homolog                                                                      | IPI00013180                                                 | 16,982.30 | 110 | 120 | DTNFGTNCICR                    | R | V | 1,357.56 |
| 2213 | NUFIP2 Nuclear fragile X mental retardation-interacting protein 2                                | IPI00002349                                                 | 76,103.10 | 110 | 122 | NLSSDEATNPISR                  | K | V | 1,403.68 |
| 2214 | FBL rRNA 2'-O-methyltransferase fibrillar                                                        | IPI00025039                                                 | 33,766.10 | 110 | 122 | NLVPGESVYGEKR                  | K | V | 1,447.75 |
| 2215 | HIST3H2BB Histone H2B type 3-B                                                                   | IPI00166293                                                 | 13,890.60 | 110 | 121 | HAVSEGTKAVTK                   | K | Y | 1,227.67 |
| 2216 | H2BFS Histone H2B type F-S                                                                       | IPI00477495,IPI00816252                                     | 13,926.60 | 110 | 121 | HAVSEGTKAVTK                   | K | Y | 1,227.67 |
| 2217 | HIST1H2BJ Histone H2B type 1-J                                                                   | IPI00515061                                                 | 13,886.70 | 110 | 121 | HAVSEGTKAVTK                   | K | Y | 1,227.67 |
| 2218 | TALDO1 Transaldolase                                                                             | IPI00744692                                                 | 37,523.70 | 111 | 121 | LSFDKAMDVAR                    | R | A | 1,252.64 |
| 2219 | PRDX1 Peroxiredoxin-1                                                                            | IPI00000874                                                 | 22,092.90 | 111 | 120 | TIAQDYGVLK                     | R | A | 1,107.60 |
| 2220 | UBE2S Ubiquitin-conjugating enzyme E2 S                                                          | IPI00217949                                                 | 23,828.40 | 111 | 117 | HVLLTIK                        | R | C | 823.5401 |
| 2221 | SEC11A Signal peptidase complex catalytic subunit SEC11A                                         | IPI00104128,IPI00873253,IPI00873608                         | 20,607.80 | 111 | 123 | FLTQKGDNNVDDR                  | K | G | 1,464.71 |
| 2222 | CTTN Src substrate cortactin                                                                     | IPI00029601                                                 | 61,567.40 | 111 | 119 | HCSQVDSVR                      | K | G | 1,087.49 |
| 2223 | PRDX1 Peroxiredoxin-1                                                                            | IPI00000874                                                 | 22,092.90 | 111 | 128 | TIAQDYGVLKADEGISFR             | R | G | 1,983.02 |
| 2224 | TPT1 Translationally-controlled tumor protein                                                    | IPI00550900                                                 | 19,578.20 | 111 | 123 | VKPFMTGAAEQIK                  | R | H | 1,435.76 |
| 2225 | ILF2 Interleukin enhancer-binding factor 2                                                       | IPI00005198,IPI00872107                                     | 43,044.70 | 111 | 127 | GTMTTGHNVDLVVILK               | K | I | 1,784.96 |
| 2226 | MDH1 Malate dehydrogenase, cytoplasmic                                                           | IPI00291005,IPI00915869                                     | 36,408.90 | 111 | 121 | SQGAALDKYAK                    | K | K | 1,151.61 |
| 2227 | RAN GTP-binding nuclear protein Ran                                                              | IPI00643041,IPI00795671                                     | 24,405.10 | 111 | 129 | VCENIPIVLCGNKVDIKDR            | R | K | 2,242.17 |
| 2228 | APOBEC3C Probable DNA dC->dU-editing enzyme APOBEC-3C                                            | IPI00555878,IPI00872929                                     | 22,808.00 | 111 | 122 | HSNVNLTIFTAR                   | R | L | 1,372.73 |
| 2229 | PCNA Proliferating cell nuclear antigen                                                          | IPI00021700                                                 | 28,751.30 | 111 | 117 | VSDYEMK                        | K | L | 871.3866 |
| 2230 | RHOT1 Isoform 3 of Mitochondrial Rho GTPase 1                                                    | IPI00217536,IPI00432452,IPI00651681,IPI00759714,IPI00759775 | 79,531.40 | 111 | 119 | LPLILVGNK                      | R | S | 966.6348 |
| 2231 | MDH1 Malate dehydrogenase, cytoplasmic                                                           | IPI00291005,IPI00915869                                     | 36,408.90 | 111 | 122 | SQGAALDKYAKK                   | K | S | 1,279.70 |
| 2232 | RHOT2 Isoform 1 of Mitochondrial Rho GTPase 2                                                    | IPI00465059                                                 | 68,099.60 | 111 | 119 | VPIILVGNK                      | R | S | 952.6191 |
| 2233 | POLR2G DNA-directed RNA polymerase II subunit RPB7                                               | IPI00218895                                                 | 19,276.60 | 111 | 129 | HSIPSEMEFDPNSNPPCYK            | R | T | 2,248.96 |
| 2234 | PRDX2 Peroxiredoxin-2                                                                            | IPI00027350                                                 | 21,874.40 | 111 | 119 | LSEDYGVLK                      | R | T | 1,023.54 |
| 2235 | EIF4A1 Eukaryotic initiation factor 4A-I                                                         | IPI00025491,IPI00871852                                     | 46,137.30 | 111 | 118 | ELAQIQIK                       | R | V | 957.5365 |
| 2236 | YWHAH 14-3-3 protein eta                                                                         | IPI00216319                                                 | 28,201.60 | 111 | 120 | NCNDFQYESK                     | K | V | 1,304.52 |
| 2237 | YWHAG 14-3-3 protein gamma                                                                       | IPI00220642                                                 | 28,285.10 | 111 | 120 | NCSETQYESK                     | K | V | 1,245.51 |
| 2238 | RAN GTP-binding nuclear protein Ran                                                              | IPI00643041,IPI00795671                                     | 24,405.10 | 111 | 123 | VCENIPIVLCGNK                  | R | V | 1,515.77 |
| 2239 | PFKM cDNA FLJ44241 fis, clone THYMU3008436, highly similar to 6-phosphofructokinase, muscle type | IPI00465179,IPI00743142                                     | 93,203.30 | 111 | 118 | VGIFTGAR                       | R | V | 820.4676 |

|      |                                                                           |                                                             |           |     |     |                                |   |   |          |
|------|---------------------------------------------------------------------------|-------------------------------------------------------------|-----------|-----|-----|--------------------------------|---|---|----------|
| 2240 | FSCN1 Fascin                                                              | IPI00163187,IPI00747810                                     | 54,512.30 | 111 | 131 | YFGGTEDRLSCFAQTVSPA<br>K       | R | W | 2,363.10 |
| 2241 | FDPS Farnesyl pyrophosphate synthetase                                    | IPI00914566                                                 | 48,258.70 | 111 | 123 | LKEVLEYNAIGGK                  | R | Y | 1,433.80 |
| 2242 | RPS25 40S ribosomal protein S25                                           | IPI00012750                                                 | 13,725.00 | 112 | 125 | NTKGGDAPAAGEDA                 | R | - | 1,273.57 |
| 2243 | RPS25 40S ribosomal protein S25                                           | IPI00012750                                                 | 13,725.00 | 112 | 125 | NTKGGDAPAAGEDA                 | R | - | 1,273.57 |
| 2244 | RPS25 40S ribosomal protein S25                                           | IPI00012750                                                 | 13,725.00 | 112 | 125 | NTKGGDAPAAGEDA                 | R | - | 1,273.57 |
| 2245 | THEM2 Thioesterase superfamily member 2                                   | IPI00020530                                                 | 14,942.60 | 112 | 123 | TLAFTSVDLTNK                   | K | A | 1,309.70 |
| 2246 | CDC123 Cell division cycle protein 123 homolog                            | IPI00005670                                                 | 39,118.10 | 112 | 123 | DAYWIAMNSSLK                   | R | C | 1,398.67 |
| 2247 | ALDOC Fructose-bisphosphate aldolase C                                    | IPI00418262                                                 | 39,438.20 | 112 | 134 | GVVPLAGTDGETTTQGLDGL<br>SER    | K | C | 2,273.13 |
| 2248 | ALDOA Fructose-bisphosphate aldolase A                                    | IPI00465439                                                 | 39,402.60 | 112 | 134 | GVVPLAGTNGETTTQGLDGL<br>SER    | K | C | 2,272.14 |
| 2249 | SFRS6 Isoform SRP55-1 of Splicing factor, arginine/serine-rich 6          | IPI00012345,IPI00215879,IPI00556297                         | 39,570.40 | 112 | 120 | LIVENLSSR                      | R | C | 1,030.59 |
| 2250 | PMVK Phosphomevalonate kinase                                             | IPI00220648                                                 | 21,977.00 | 112 | 119 | VSDIQWFR                       | R | E | 1,050.54 |
| 2251 | PPP1CA Serine/threonine-protein phosphatase PP1-alpha catalytic subunit   | IPI00550451                                                 | 37,495.90 | 112 | 122 | IKYPENFFLLR                    | K | G | 1,439.80 |
| 2252 | RELA Isoform 2 of Transcription factor p65                                | IPI00219084,IPI00386448,IPI00479470,IPI00883897             | 58,789.60 | 112 | 120 | DLEQAISQR                      | R | I | 1,059.54 |
| 2253 | SERBP1 Isoform 1 of Plasminogen activator inhibitor 1 RNA-binding protein | IPI00410693,IPI00412714,IPI00470497,IPI00470498             | 44,947.80 | 112 | 122 | RPDQQLQGEGK                    | R | I | 1,255.64 |
| 2254 | SERBP1 Isoform 1 of Plasminogen activator inhibitor 1 RNA-binding protein | IPI00410693,IPI00412714,IPI00470497,IPI00470498             | 44,947.80 | 112 | 122 | RPDQQLQGEGK                    | R | I | 1,255.64 |
| 2255 | SNRPB2 U2 small nuclear ribonucleoprotein B"                              | IPI00029267                                                 | 25,469.50 | 112 | 122 | TVEQTATTTNK                    | K | K | 1,193.60 |
| 2256 | RAB1A Isoform 1 of Ras-related protein Rab-1A                             | IPI00005719,IPI00873902                                     | 22,660.40 | 112 | 119 | YASENVNK                       | R | L | 924.442  |
| 2257 | CACYBP Isoform 1 of Calcyclin-binding protein                             | IPI00395627                                                 | 26,192.30 | 112 | 118 | SFDLLVK                        | R | N | 821.4768 |
| 2258 | NIT2 Nitrilase homolog 2                                                  | IPI00549467,IPI00872668                                     | 30,590.80 | 112 | 130 | KIHLFDIDVPGKITFQESK            | R | T | 2,215.21 |
| 2259 | EIF4A2 Isoform 1 of Eukaryotic initiation factor 4A-II                    | IPI00328328,IPI00409717                                     | 46,385.60 | 112 | 119 | ELAQQIQK                       | R | V | 957.5365 |
| 2260 | PDRG1 p53 and DNA damage-regulated protein 1                              | IPI00027887                                                 | 15,493.60 | 113 | 125 | GFNLNPLNQDELK                  | K | A | 1,501.76 |
| 2261 | CANX cDNA FLJ55574, highly similar to Calnexin                            | IPI00020984,IPI00383227,IPI00477719                         | 71,486.80 | 113 | 122 | GTLSGWILSK                     | R | A | 1,061.60 |
| 2262 | CDKN2A Cyclin-dependent kinase inhibitor                                  | IPI00001560                                                 | 17,865.30 | 113 | 124 | LPVDLAEELGHR                   | R | D | 1,348.72 |
| 2263 | GRB2 Isoform 1 of Growth factor receptor-bound protein 2                  | IPI00021327                                                 | 25,188.80 | 113 | 124 | DGAGKYFLWVVK                   | R | F | 1,382.75 |
| 2264 | CCDC97 Coiled-coil domain-containing protein 97                           | IPI00061777                                                 | 38,928.70 | 113 | 127 | TGLREEHLACFGHVR                | R | G | 1,781.89 |
| 2265 | TUBA1A Tubulin alpha-1A chain                                             | IPI00180675                                                 | 50,117.70 | 113 | 121 | EIIDLVLDLDR                    | K | I | 1,085.62 |
| 2266 | TUBA1A Tubulin alpha-1A chain                                             | IPI00180675                                                 | 50,117.70 | 113 | 121 | EIIDLVLDLDR                    | K | I | 1,085.62 |
| 2267 | TUBA1A Tubulin alpha-1A chain                                             | IPI00180675                                                 | 50,117.70 | 113 | 121 | EIIDLVLDLDR                    | K | I | 1,085.62 |
| 2268 | TUBA1C Tubulin alpha-1C chain                                             | IPI00218343                                                 | 49,877.40 | 113 | 121 | EIIDLVLDLDR                    | K | I | 1,085.62 |
| 2269 | TUBA1B Tubulin alpha-1B chain                                             | IPI00387144,IPI00792677                                     | 50,133.70 | 113 | 121 | EIIDLVLDLDR                    | K | I | 1,085.62 |
| 2270 | RAB18 Ras-related protein Rab-18                                          | IPI00014577                                                 | 22,959.50 | 113 | 123 | NDIVNMLVGNK                    | R | I | 1,216.64 |
| 2271 | HMGB1 High mobility group protein B1                                      | IPI00419258                                                 | 24,876.70 | 113 | 127 | IKGEHPGLSIGDVAK                | K | K | 1,520.84 |
| 2272 | HMGB2 High mobility group protein B2                                      | IPI00219097                                                 | 24,016.60 | 113 | 127 | IKSEHPGLSIGDTAK                | K | K | 1,552.83 |
| 2273 | HSPA1A;HSPA1B Heat shock 70 kDa protein 1                                 | IPI00304925                                                 | 70,036.00 | 113 | 126 | AFYPEEISSMVLTK                 | K | M | 1,630.80 |
| 2274 | HSPA1A;HSPA1B Heat shock 70 kDa protein 1                                 | IPI00304925                                                 | 70,036.00 | 113 | 126 | AFYPEEISSMVLTK                 | K | M | 1,630.80 |
| 2275 | HSPA8 Isoform 1 of Heat shock cognate 71 kDa protein                      | IPI00003865                                                 | 70,881.80 | 113 | 126 | SFYPEEVSSMVLTK                 | K | M | 1,632.78 |
| 2276 | TIMM23 Mitochondrial import inner membrane translocase subunit Tim23      | IPI00007309                                                 | 21,926.20 | 113 | 122 | NVQILNMVTR                     | R | Q | 1,203.65 |
| 2277 | EIF3D Eukaryotic translation initiation factor 3 subunit D                | IPI00006181,IPI00791086                                     | 63,955.80 | 113 | 124 | NMLQFNLQILPK                   | R | S | 1,474.81 |
| 2278 | RPLP0 60S acidic ribosomal protein P0                                     | IPI00008530                                                 | 34,256.30 | 113 | 134 | AGAIAPCEVTVPAQNTGLGPE<br>K     | R | T | 2,180.10 |
| 2279 | PIN4 protein (peptidyl-prolyl cis/trans isomerase) NIMA-interacting, 4    | IPI00006658                                                 | 16,590.50 | 113 | 142 | GSMVGPFFQEAALPVS<br>KPVFTDPPVK | R | T | 3,151.55 |
| 2280 | YRDC YrdC domain-containing protein, mitochondrial                        | IPI00384180                                                 | 29,310.30 | 113 | 124 | SEAKPLAVCLGR                   | R | V | 1,300.70 |
| 2281 | SFRS7 Isoform 1 of Splicing factor, arginine/serine-rich 7                | IPI00003377,IPI00215907,IPI00332419,IPI00744364,IPI00916448 | 27,349.50 | 113 | 121 | GHYAYDCHR                      | K | Y | 1,178.48 |



|      |                                                                                 |                                                 |            |     |     |                         |   |   |          |
|------|---------------------------------------------------------------------------------|-------------------------------------------------|------------|-----|-----|-------------------------|---|---|----------|
| 2282 | CDKN2A Cyclin-dependent kinase inhibitor                                        | IPI00001560                                     | 17,865.30  | 113 | 128 | LPVDLAEELGHRDVAR        | R | Y | 1,789.96 |
| 2283 | RPL22 60S ribosomal protein L22                                                 | IPI00219153,IPI00878392                         | 14,769.30  | 114 | 128 | YFQINQDEEEEEDED         | R | - | 1,931.73 |
| 2284 | RPL23 60S ribosomal protein L23                                                 | IPI00010153,IPI00795408                         | 14,847.90  | 114 | 123 | GSAITGPVAK              | K | E | 900.515  |
| 2285 | RAB7A Ras-related protein Rab-7a                                                | IPI00016342                                     | 23,472.00  | 114 | 126 | DPENFPFVVLGNK           | R | I | 1,475.75 |
| 2286 | UNG Isoform 2 of Uracil-DNA glycosylase                                         | IPI00011069                                     | 34,627.40  | 114 | 122 | LMGFVAEER               | K | K | 1,067.52 |
| 2287 | C16orf80 UPF0468 protein C16orf80                                               | IPI00001655                                     | 22,757.60  | 114 | 124 | VKPFICTMPMR             | R | L | 1,395.69 |
| 2288 | SNRPA1 U2 small nuclear ribonucleoprotein A'                                    | IPI00297477                                     | 28,399.10  | 114 | 122 | SLTYLSILR               | K | N | 1,065.63 |
| 2289 | MAPRE1 Microtubule-associated protein RP/EB family member 1                     | IPI00017596,IPI00910350                         | 29,981.50  | 114 | 130 | FFDANYDGKDYPVAAR        | K | Q | 1,963.88 |
| 2290 | SKP1 Isoform 1 of S-phase kinase-associated protein 1                           | IPI00301364                                     | 18,640.30  | 114 | 121 | GLLDVTCK                | K | T | 905.4763 |
| 2291 | PSMD6 26S proteasome non-ATPase regulatory subunit 6                            | IPI00014151                                     | 45,515.40  | 114 | 126 | IGDKEGALTAFRK           | R | T | 1,405.78 |
| 2292 | PABPC1 Isoform 1 of Polyadenylate-binding protein 1                             | IPI00008524                                     | 70,653.30  | 114 | 129 | ALYDTFSAFGNILSCK        | K | V | 1,806.87 |
| 2293 | PABPC4 Isoform 1 of Polyadenylate-binding protein 4                             | IPI00012726,IPI00555747,IPI00642904,IPI00642944 | 70,765.80  | 114 | 129 | ALYDTFSAFGNILSCK        | K | V | 1,806.87 |
| 2294 | EIF3L Eukaryotic translation initiation factor 3, subunit E interacting protein | IPI00465233,IPI00745266                         | 70,886.50  | 114 | 121 | VYELQASR                | K | V | 965.505  |
| 2295 | RPS25 40S ribosomal protein S25                                                 | IPI00012750                                     | 13,725.00  | 115 | 125 | GGDAPAAGEDA             | K | - | 930.3801 |
| 2296 | DDX56 Probable ATP-dependent RNA helicase DDX56                                 | IPI00302281                                     | 61,573.50  | 115 | 128 | VANVSAAESVSVQR          | R | A | 1,432.70 |
| 2297 | HNRNPR heterogeneous nuclear ribonucleoprotein R isoform 1                      | IPI00644055                                     | 71,197.20  | 115 | 126 | VQUESTKGPDEAK           | K | I | 1,288.64 |
| 2298 | SUB1 Activated RNA polymerase II transcriptional coactivator p15                | IPI00221222                                     | 14,377.90  | 115 | 125 | EQISDIDDAVR             | K | K | 1,260.61 |
| 2299 | CFL1 Cofilin-1                                                                  | IPI00012011                                     | 18,485.10  | 115 | 125 | MIYASSKDAIK             | K | K | 1,242.64 |
| 2300 | DSTN Destrin                                                                    | IPI00473014                                     | 18,488.20  | 115 | 125 | MIYASSKDAIK             | K | K | 1,242.64 |
| 2301 | RPL6 60S ribosomal protein L6                                                   | IPI00329389,IPI00790342,IPI00867533             | 32,711.30  | 115 | 123 | YYPTEDVPR               | R | K | 1,139.54 |
| 2302 | PIP4K2C Phosphatidylinositol-5-phosphate 4-kinase type-2 gamma                  | IPI00152303,IPI00896381                         | 47,268.90  | 115 | 128 | FGIDDQDYLVSLTR          | R | N | 1,641.81 |
| 2303 | BTF3L4 Transcription factor BTF3 homolog 4                                      | IPI00412792                                     | 17,253.00  | 115 | 122 | KLAEQFPR                | R | Q | 988.5575 |
| 2304 | BTF3L4 Transcription factor BTF3 homolog 4                                      | IPI00412792                                     | 17,253.00  | 115 | 122 | KLAEQFPR                | R | Q | 988.5575 |
| 2305 | NME2 Nucleoside diphosphate kinase B                                            | IPI00026260                                     | 17,280.20  | 115 | 124 | NIHGSDSVK               | R | S | 1,069.56 |
| 2306 | RPL23A;hCG_16001 60S ribosomal protein L23a                                     | IPI00021266                                     | 17,678.20  | 115 | 123 | KLYDIDVAK               | K | V | 1,064.60 |
| 2307 | GSTO1 Glutathione S-transferase omega-1                                         | IPI00019755,IPI00642936                         | 27,549.20  | 115 | 122 | MILELFSK                | K | V | 980.5486 |
| 2308 | GOT1 Aspartate aminotransferase, cytoplasmic                                    | IPI00219029                                     | 46,230.10  | 115 | 122 | IGADFLAR                | R | W | 862.4782 |
| 2309 | RPL31 60S ribosomal protein L31                                                 | IPI00026302                                     | 14,445.20  | 116 | 125 | NLQTVNVVDEN             | K | - | 1,145.54 |
| 2310 | ZNF593 zinc finger protein 593                                                  | IPI00026276,IPI00844193                         | 15,181.40  | 116 | 134 | RLAVPTEVSTEVPEMDTST     | R | - | 2,078.00 |
| 2311 | C14orf166 UPF0568 protein C14orf166                                             | IPI00006980                                     | 28,051.30  | 116 | 131 | NAEPLINLDVNNPDFK        | K | A | 1,812.91 |
| 2312 | PSMD3 26S proteasome non-ATPase regulatory subunit 3                            | IPI00011603                                     | 60,961.60  | 116 | 128 | AVQGFFTSNNATR           | K | D | 1,412.69 |
| 2313 | RCC1 regulator of chromosome condensation 1 isoform a                           | IPI00001661,IPI00747309,IPI00787306             | 48,126.30  | 116 | 132 | SGQVYSFGCNDÉGALGR       | K | D | 1,816.79 |
| 2314 | NOC4L Nucleolar complex protein 4 homolog                                       | IPI00031661                                     | 58,451.40  | 116 | 124 | ELALSALLK               | K | F | 957.598  |
| 2315 | TNPO1 transportin 1 isoform 1                                                   | IPI00024364,IPI00843876                         | 102,340.80 | 116 | 128 | ATVGILITTIASK           | R | G | 1,287.79 |
| 2316 | UAP1 Isoform AGX2 of UDP-N-acetylhexosamine pyrophosphorylase                   | IPI00000684,IPI00217816,IPI00607787,IPI00646967 | 58,751.50  | 116 | 122 | LGVAYPK                 | R | G | 747.44   |
| 2317 | NDUFA12 13kDa differentiation-associated protein variant (Fragment)             | IPI00005966                                     | 17,196.50  | 116 | 132 | FNVGTGPEQYVPYSTTR       | K | K | 1,959.94 |
| 2318 | UCHL1 Ubiquitin carboxyl-terminal hydrolase isozyme L1                          | IPI00018352                                     | 24,806.30  | 116 | 123 | QFLSETEK                | K | M | 981.4888 |
| 2319 | KPNA6 cDNA FLJ53229, highly similar to Importin alpha-7 subunit                 | IPI00747764                                     | 60,563.50  | 116 | 129 | EPSPPIDEVINTPR          | K | V | 1,563.80 |
| 2320 | SF3A3 Splicing factor 3A subunit 3                                              | IPI00029764                                     | 58,833.30  | 116 | 138 | ARENPSEEQNLVEFTDEEG YGR | K | Y | 2,640.18 |
| 2321 | RPL9 60S ribosomal protein L9                                                   | IPI00031691                                     | 21,845.70  | 116 | 121 | NFLGEK                  | R | Y | 707.3723 |

|      |                                                                                    |                                                 |            |     |     |                                    |     |          |
|------|------------------------------------------------------------------------------------|-------------------------------------------------|------------|-----|-----|------------------------------------|-----|----------|
| 2322 | ANAPC7 anaphase-promoting complex subunit 7                                        | IPI00008248,IPI00915282                         | 66,839.70  | 116 | 139 | VRPSTGNSASTPQSQCPLPSEI K<br>EVK    | Y   | 2,572.27 |
| 2323 | ZNF593 zinc finger protein 593                                                     | IPI00026276,IPI00844193                         | 15,181.40  | 117 | 134 | LAVPTEVSTVEPMDTST R                | -   | 1,921.89 |
| 2324 | SGTA Small glutamine-rich tetratricopeptide repeat-containing protein alpha        | IPI00013949                                     | 34,045.90  | 117 | 131 | AIELNPANAVYFCNR                    | K A | 1,751.85 |
| 2325 | SGTA Small glutamine-rich tetratricopeptide repeat-containing protein alpha        | IPI00013949                                     | 34,045.90  | 117 | 131 | AIELNPANAVYFCNR                    | K A | 1,751.85 |
| 2326 | IMP4 U3 small nucleolar ribonucleoprotein protein IMP4                             | IPI00181116,IPI00916569,IPI00917966             | 33,738.90  | 117 | 126 | GRHEVGALVR                         | R A | 1,093.62 |
| 2327 | PSMD10 26S proteasome non-ATPase regulatory subunit 10                             | IPI00003565,IPI00027699                         | 24,410.20  | 117 | 135 | NRHEIAVMLLEGGANPDAK                | K D | 2,051.03 |
| 2328 | WDR1 Isoform 1 of WD repeat-containing protein 1                                   | IPI00746165,IPI00873622                         | 66,175.20  | 117 | 124 | IAVVGEGR                           | R E | 800.4625 |
| 2329 | ANP32B Isoform 1 of Acidic leucine-rich nuclear phosphoprotein 32 family member B  | IPI00007423,IPI00759824                         | 28,770.60  | 117 | 132 | SLDLFNCEVTNLNDYR                   | K E | 1,972.91 |
| 2330 | ANP32A Acidic leucine-rich nuclear phosphoprotein 32 family member A               | IPI00025849                                     | 28,568.10  | 117 | 132 | SLDLFNCEVTNLNDYR                   | K E | 1,972.91 |
| 2331 | TSN Translin                                                                       | IPI00018768,IPI00917623                         | 26,165.40  | 117 | 131 | EAVTEILGIEPDREK                    | R G | 1,698.89 |
| 2332 | NARS Asparaginyl-tRNA synthetase, cytoplasmic                                      | IPI00306960                                     | 62,926.20  | 117 | 124 | IGALEGYR                           | K G | 878.4731 |
| 2333 | HSP90B1 Endoplasmic                                                                | IPI00027230                                     | 92,453.70  | 117 | 135 | LISLTDENALSGNEELTVK                | R I | 2,046.06 |
| 2334 | RAB1B Ras-related protein Rab-1B                                                   | IPI00008964,IPI00896425                         | 22,154.00  | 117 | 128 | LLVGNKSDLTTK                       | K K | 1,288.75 |
| 2335 | PPAT Amidophosphoribosyltransferase                                                | IPI00029534                                     | 57,381.30  | 117 | 130 | IAVAHGELVNAAR                      | K L | 1,434.78 |
| 2336 | FARSB Phenylalanyl-tRNA synthetase beta chain                                      | IPI00300074                                     | 66,114.60  | 117 | 127 | IRPFAVAALR                         | K N | 1,212.76 |
| 2337 | RBM3 Putative RNA-binding protein 3                                                | IPI00024320                                     | 17,152.60  | 117 | 131 | YYDSRPGGYGYGYGR                    | R S | 1,730.76 |
| 2338 | - cDNA FLJ54408, highly similar to Heat shock 70 kDa protein 1                     | IPI00911039                                     | 63,907.90  | 117 | 132 | IINEPTAAAIYGLDR                    | R T | 1,687.90 |
| 2339 | PDCD10 Programmed cell death protein 10                                            | IPI00298558                                     | 24,684.50  | 117 | 124 | IPDEINDR                           | K V | 971.4794 |
| 2340 | H2BFS Histone H2B type F-S                                                         | IPI00477495,IPI00816252                         | 13,926.60  | 118 | 126 | AVTKYTSAK                          | K - | 968.5411 |
| 2341 | HIST1H2BJ Histone H2B type 1-J                                                     | IPI00515061                                     | 13,886.70  | 118 | 126 | AVTKYTSAK                          | K - | 968.5411 |
| 2342 | CCT6A T-complex protein 1 subunit zeta                                             | IPI00027626,IPI00552590                         | 58,007.30  | 118 | 129 | IITEGFEEAKEK                       | R A | 1,335.72 |
| 2343 | HIST2H3A;HIST2H3D;HIST2H3C Histone H3.2                                            | IPI00171611,IPI00219038,IPI00465070,IPI00909530 | 15,370.70  | 118 | 123 | VTIMPK                             | R D | 704.4013 |
| 2344 | GAPDH Glyceraldehyde-3-phosphate dehydrogenase                                     | IPI00219018                                     | 36,035.30  | 118 | 145 | RVIISAPSADAPMFVMGVNHE K<br>KYDNSLK | I   | 3,089.55 |
| 2345 | UBE2S Ubiquitin-conjugating enzyme E2 S                                            | IPI00217949                                     | 23,828.40  | 118 | 135 | CLLIHPNPESALNEEAGR                 | K L | 2,019.99 |
| 2346 | PSPC1 Isoform 1 of Paraspeckle component 1                                         | IPI00103525,IPI00395775                         | 58,726.50  | 118 | 123 | GFGFIR                             | R L | 696.3828 |
| 2347 | EIF4B cDNA FLJ54492, highly similar to Eukaryotic translation initiation factor 4B | IPI00012079,IPI00908588                         | 69,710.40  | 118 | 125 | GLNISAVR                           | R L | 829.489  |
| 2348 | PCNA Proliferating cell nuclear antigen                                            | IPI00021700                                     | 28,751.30  | 118 | 138 | LMDLDVEQLGIPEQEYSCVVK              | K M | 2,481.19 |
| 2349 | GUK1 Guanylate kinase 1                                                            | IPI00514494,IPI00515106,IPI00644488             | 23,479.80  | 118 | 129 | ICVLDVDLQGVR                       | R N | 1,386.74 |
| 2350 | PSMG2 Proteasome assembly chaperone 2                                              | IPI00644482                                     | 29,379.40  | 118 | 129 | VIVLSSSHSYQR                       | R N | 1,375.73 |
| 2351 | ARF1 ADP-ribosylation factor 1                                                     | IPI00215914,IPI00215917                         | 20,679.60  | 118 | 127 | DAVLLVFANK                         | R Q | 1,089.63 |
| 2352 | GNB2L1 38 kDa protein                                                              | IPI00641950,IPI00848226                         | 37,740.10  | 118 | 128 | LWDLTTGTTTR                        | R R | 1,264.65 |
| 2353 | HIST2H3A;HIST2H3D;HIST2H3C Histone H3.2                                            | IPI00171611,IPI00219038,IPI00465070,IPI00909530 | 15,370.70  | 118 | 129 | VTIMPKDIQLAR                       | R R | 1,400.79 |
| 2354 | C1orf35 Isoform 1 of Multiple myeloma tumor-associated protein 2                   | IPI00293746,IPI00642240                         | 29,393.90  | 118 | 130 | LLGLGSASGSVGR                      | R V | 1,173.66 |
| 2355 | SF3A3 Splicing factor 3A subunit 3                                                 | IPI00029764                                     | 58,833.30  | 118 | 138 | ENPSEEANLVEFTDEEGY R<br>R          | Y   | 2,413.04 |
| 2356 | GAPDH Glyceraldehyde-3-phosphate dehydrogenase                                     | IPI00219018                                     | 36,035.30  | 118 | 139 | RVIISAPSADAPMFVMGVNHE K<br>K       | Y   | 2,369.21 |
| 2357 | ST13 Hsc70-interacting protein                                                     | IPI00032826                                     | 41,314.40  | 119 | 132 | VAAIEALNDGELQK                     | K A | 1,470.78 |
| 2358 | ST13 Hsc70-interacting protein                                                     | IPI00032826                                     | 41,314.40  | 119 | 132 | VAAIEALNDGELQK                     | K A | 1,470.78 |
| 2359 | NARG1 Isoform 1 of NMDA receptor-regulated protein 1                               | IPI00386189                                     | 101,259.90 | 119 | 128 | DLSELLQIMR                         | R D | 1,216.67 |
| 2360 | AP3S1 AP-3 complex subunit sigma-1                                                 | IPI00014624                                     | 32,126.80  | 119 | 133 | FYQPYS EDTQQQIIR                   | K E | 1,915.92 |
| 2361 | GNPNAT1 Glucosamine 6-phosphate N-acetyltransferase                                | IPI00061525                                     | 20,731.30  | 119 | 129 | VEDVVVSDECR                        | R G | 1,306.59 |
| 2362 | PPIA Peptidyl-prolyl cis-trans isomerase A                                         | IPI00419585,IPI00887678                         | 17,994.90  | 119 | 125 | TEWLDGK                            | K H | 848.415  |

|      |                                                                         |                                                                                     |            |     |     |                               |   |          |
|------|-------------------------------------------------------------------------|-------------------------------------------------------------------------------------|------------|-----|-----|-------------------------------|---|----------|
| 2363 | GAPDH Glyceraldehyde-3-phosphate dehydrogenase                          | UPI00219018                                                                         | 36,035.30  | 119 | 145 | VIISAPSADAPMFVMGVNHEK R       | I | 2,965.44 |
| 2364 | RRM1 Ribonucleoside-diphosphate reductase large subunit                 | UPI00013871                                                                         | 90,055.50  | 119 | 130 | YDNSLK<br>STLTDIVLANKDR       | K | 1,344.75 |
| 2365 | METTL5 Methyltransferase-like protein 5                                 | UPI00299888,UPI00917041,UPI00917185                                                 | 23,702.40  | 119 | 132 | SFDTVIMNPPFGTK                | K | 1,569.76 |
| 2366 | PAFAH1B3 Platelet-activating factor acetylhydrolase IB subunit gamma    | UPI00014808                                                                         | 25,715.60  | 119 | 127 | AIVQLVNER                     | K | 1,041.61 |
| 2367 | DNAJC9 DnaJ homolog subfamily C member 9                                | UPI00154975                                                                         | 29,892.30  | 119 | 131 | TYKGSEEELADIK                 | K | 1,482.73 |
| 2368 | PPIA Peptidyl-prolyl cis-trans isomerase A                              | UPI00419585,UPI00887678                                                             | 17,994.90  | 119 | 131 | TEWLDGKHVVFVK                 | K | 1,515.80 |
| 2369 | FSCN1 Fascin                                                            | UPI00163187,UPI00747810                                                             | 54,512.30  | 119 | 131 | LSCFAQTVSPAEEK                | R | 1,437.70 |
| 2370 | YBX1 Nuclease-sensitive element-binding protein 1                       | UPI00031812,UPI00643351                                                             | 35,905.70  | 119 | 137 | GAEAAVNTGPGGVPVQGSK           | K | 1,695.87 |
| 2371 | ARPC2 Actin-related protein 2/3 complex subunit 2                       | UPI00005161                                                                         | 34,315.70  | 119 | 127 | NCFASVFEK                     | R | 1,101.50 |
| 2372 | CCT2 T-complex protein 1 subunit beta                                   | UPI00297779                                                                         | 57,471.90  | 120 | 131 | KIHPQTIAGWR                   | K | 1,419.82 |
| 2373 | PDIA4 Protein disulfide-isomerase A4                                    | UPI00009904                                                                         | 72,916.00  | 120 | 131 | IDATSASVLSAR                  | K | 1,190.64 |
| 2374 | RPL18 60S ribosomal protein L18                                         | UPI00215719                                                                         | 21,617.20  | 120 | 132 | ILTFDQLALDSPK                 | K | 1,460.80 |
| 2375 | TPD52L2 Isoform 2 of Tumor protein D54                                  | UPI00221178,UPI00306825,UPI00399265,UPI00399266,UPI00399267,UPI00399268,UPI00743469 | 19,883.30  | 120 | 133 | TSALSTVGSASIR                 | K | 1,320.71 |
| 2376 | HNRNPD Isoform 1 of Heterogeneous nuclear ribonucleoprotein D0          | UPI00028888,UPI00220684                                                             | 38,416.50  | 120 | 129 | FGEVVDCTLK                    | K | 1,167.57 |
| 2377 | HNRNPD Isoform 1 of Heterogeneous nuclear ribonucleoprotein D0          | UPI00028888,UPI00220684                                                             | 38,416.50  | 120 | 129 | FGEVVDCTLK                    | K | 1,167.57 |
| 2378 | PTRH2 Peptidyl-tRNA hydrolase 2, mitochondrial                          | UPI00032903,UPI00555597                                                             | 19,175.70  | 120 | 134 | APDEETLIALLAHAK               | K | 1,591.87 |
| 2379 | MARS Methionyl-tRNA synthetase, cytoplasmic                             | UPI00008240                                                                         | 101,099.50 | 120 | 130 | ALTHIDHLSLR                   | R | 1,249.66 |
| 2380 | NONO Non-POU domain-containing octamer-binding protein                  | UPI00304596                                                                         | 54,213.60  | 120 | 137 | TLAEIAKVELDNMPLRGK            | R | 2,014.10 |
| 2381 | RPS6 40S ribosomal protein S6                                           | UPI00021840                                                                         | 28,663.70  | 120 | 131 | DIPGLTDDTVPR                  | K | 1,284.68 |
| 2382 | HNRNPD Isoform 1 of Heterogeneous nuclear ribonucleoprotein D0          | UPI00028888,UPI00220684                                                             | 38,416.50  | 120 | 136 | FGEVVDCTLKLDPITGR             | K | 1,919.99 |
| 2383 | DBR1 Isoform 1 of Lariat debranching enzyme                             | UPI00305545                                                                         | 61,538.00  | 120 | 128 | IGGISGIFK                     | R | 891.53   |
| 2384 | RIOK1 Serine/threonine-protein kinase RIO1                              | UPI00171336                                                                         | 65,566.30  | 120 | 138 | INLDKLNVTDSVINKVTEK           | K | 2,143.20 |
| 2385 | MLF2 Myeloid leukemia factor 2                                          | UPI00023095                                                                         | 28,129.90  | 120 | 128 | VYQETSEMR                     | K | 1,142.51 |
| 2386 | PMVK Phosphomevalonate kinase                                           | UPI00220648                                                                         | 21,977.00  | 120 | 130 | EAYGAVTQTVR                   | R | 1,194.61 |
| 2387 | PGD 6-phosphogluconate dehydrogenase, decarboxylating                   | UPI00219525,UPI00747533                                                             | 53,123.90  | 120 | 136 | GILFVSGVSGGEEGAR              | K | 1,591.81 |
| 2388 | EIF3B Isoform 1 of Eukaryotic translation initiation factor 3 subunit B | UPI00396370,UPI00719752                                                             | 92,464.80  | 121 | 134 | AQAVSEDAGGNEGR                | R | 1,360.61 |
| 2389 | ATP6V1A V-type proton ATPase catalytic subunit A                        | UPI00007682                                                                         | 68,287.40  | 121 | 129 | GVNVSALSAR                    | R | 902.5053 |
| 2390 | NOP5/NOP58 Nucleolar protein 5                                          | UPI00006379                                                                         | 59,562.20  | 121 | 133 | SQMDGLIPGVEPR                 | R | 1,414.70 |
| 2391 | PRDX1 Peroxiredoxin-1                                                   | UPI00000874                                                                         | 22,092.90  | 121 | 128 | ADEGISFR                      | K | 894.4316 |
| 2392 | RBM4 Isoform 1 of RNA-binding protein 4                                 | UPI00003704                                                                         | 40,296.20  | 121 | 129 | AEDAIVEAIR                    | R | 973.4949 |
| 2393 | VDAC1 Voltage-dependent anion-selective channel protein 1               | UPI00216308                                                                         | 30,755.90  | 121 | 139 | EHINLGCMDDFDIAGPSIR           | R | 2,175.98 |
| 2394 | PKM2 Isoform M1 of Pyruvate kinase isozymes M1/M2                       | UPI00220644,UPI00479186                                                             | 58,044.60  | 121 | 136 | TGLIKSGTAEVELKK               | R | 1,630.94 |
| 2395 | RELA Isoform 2 of Transcription factor p65                              | UPI00219084,UPI00386448,UPI00479470,UPI00883897                                     | 58,789.60  | 121 | 145 | IQTNNNPFQVPIEEQRGDYDL<br>NAVR | R | 2,930.44 |
| 2396 | AKR7A2 Aflatoxin B1 aldehyde reductase member 2                         | UPI00305978                                                                         | 39,571.00  | 121 | 129 | SQLETSLKR                     | R | 1,061.60 |
| 2397 | DDX17 DEAD box polypeptide 17 isoform 1                                 | UPI00023785,UPI00651653                                                             | 80,256.00  | 121 | 132 | KWDLSELPKFEK                  | K | 1,519.82 |
| 2398 | YWHAZ 14-3-3 protein zeta/delta                                         | UPI00021263                                                                         | 27,727.90  | 121 | 127 | MKGDYR                        | K | 932.4295 |
| 2399 | CD81 CD81 antigen                                                       | UPI00000190,UPI00657752                                                             | 25,791.80  | 122 | 144 | DVKQFYDQALQQAVVDDAN<br>NAK    | K | 2,595.23 |
| 2400 | NDUFB10 NADH dehydrogenase [ubiquinone] 1 beta subcomplex subunit 10    | UPI00479905                                                                         | 20,758.70  | 122 | 131 | EVEQFTQVAK                    | K | 1,178.61 |
| 2401 | UCHL3 Ubiquitin carboxyl-terminal hydrolase isozyme L3                  | UPI00011250                                                                         | 26,164.80  | 122 | 134 | FLEESVMSPEER                  | K | 1,555.69 |
| 2402 | FBL rRNA 2'-O-methyltransferase fibrillarin                             | UPI00025039                                                                         | 33,766.10  | 122 | 135 | RVSISEGDDKIEYR                | K | 1,666.84 |

|      |                                                                           |                                                 |           |     |     |                                          |   |          |
|------|---------------------------------------------------------------------------|-------------------------------------------------|-----------|-----|-----|------------------------------------------|---|----------|
| 2403 | WDR77 Methylosome protein 50                                              | IPI00012202                                     | 36,705.20 | 122 | 145 | YEHDDIVSTVSVLSSGTQAVS K<br>GSK           | D | 2,466.20 |
| 2404 | RRM2 Ribonucleoside-diphosphate reductase M2 subunit                      | IPI00011118                                     | 51,076.50 | 122 | 134 | AAAPGVEDEPLLR K                          | E | 1,337.71 |
| 2405 | TUBB2C Tubulin beta-2C chain                                              | IPI00007752                                     | 49,812.70 | 122 | 154 | KEAESCDCQLQGFQLTHSLGG R<br>GTGSGMGTLLISK | I | 3,439.63 |
| 2406 | TUBB Tubulin beta chain                                                   | IPI00011654                                     | 49,652.60 | 122 | 154 | KEAESCDCQLQGFQLTHSLGG R<br>GTGSGMGTLLISK | I | 3,439.63 |
| 2407 | CDIPT Isoform 1 of CDP-diacylglycerol--inositol 3-phosphatidyltransferase | IPI00645518,IPI00647250,IPI00902843,IPI00910287 | 23,522.30 | 122 | 132 | MIDLSGNPVL R                             | K | 1,230.65 |
| 2408 | BASP1 Brain acid soluble protein 1                                        | IPI00299024                                     | 22,675.30 | 122 | 149 | AAEAAAAPAESAAPAAGEEPS K<br>KEEGEPK       | K | 2,636.23 |
| 2409 | RPL14 Ribosomal protein L14 variant                                       | IPI00555744                                     | 23,769.70 | 122 | 128 | IIKNEVK R                                | K | 843.5299 |
| 2410 | NOL7 Isoform 1 of Nucleolar protein 7                                     | IPI00007729                                     | 29,408.90 | 122 | 131 | LTTASQTNK K                              | K | 1,076.59 |
| 2411 | RPL13 60S ribosomal protein L13                                           | IPI00465361                                     | 24,244.20 | 122 | 129 | SKLILFPR R                               | K | 973.6194 |
| 2412 | SAP18 Sin3A-associated protein, 18kDa                                     | IPI00011698                                     | 19,508.80 | 122 | 132 | VKEIGSTMSG R                             | K | 1,180.60 |
| 2413 | GSTP1 Glutathione S-transferase P                                         | IPI00219757                                     | 23,338.70 | 122 | 141 | ALPGQLKPFETLLSQNQQGK K                   | T | 2,126.16 |
| 2414 | ATAD1 ATPase family AAA domain-containing protein 1                       | IPI00171445,IPI00910210                         | 40,727.10 | 122 | 139 | LLQPPKGVLLYPPGCGK R                      | T | 1,894.06 |
| 2415 | HNRNPA2B1 43 kDa protein                                                  | IPI00874030                                     | 43,234.30 | 122 | 150 | SRGFGFVTFSSMAEVDAA R<br>ARPHSIDGR        | V | 3,086.46 |
| 2416 | NAPA Alpha-soluble NSF attachment protein                                 | IPI00009253                                     | 33,216.10 | 123 | 140 | HHISIAEYETELVDIEK K                      | A | 2,139.10 |
| 2417 | EEF1B2 Elongation factor 1-beta                                           | IPI00178440                                     | 24,746.20 | 123 | 130 | LAQYESKK R                               | A | 966.5255 |
| 2418 | FBL rRNA 2'-O-methyltransferase fibrillarin                               | IPI00025039                                     | 33,766.10 | 123 | 135 | VSISEGDDKIEY R                           | A | 1,510.74 |
| 2419 | MAGOHB Protein mago nashi homolog 2                                       | IPI00059292                                     | 17,258.60 | 123 | 132 | VFYYLVQDLK R                             | C | 1,287.70 |
| 2420 | FHL1 Four and a half LIM domains 1 variant                                | IPI00014398,IPI00647207                         | 33,559.30 | 123 | 134 | AIVAGDQNV EYK K                          | G | 1,306.66 |
| 2421 | RACGAP1 Rac GTPase-activating protein 1                                   | IPI00152946                                     | 71,009.80 | 123 | 130 | SALAFLNR K                               | G | 891.5046 |
| 2422 | TUBB2C Tubulin beta-2C chain                                              | IPI00007752                                     | 49,812.70 | 123 | 154 | EAESCDCQLQGFQLTHSLGGG K<br>TGSGMGTLLISK  | I | 3,327.53 |
| 2423 | TUBB2C Tubulin beta-2C chain                                              | IPI00007752                                     | 49,812.70 | 123 | 154 | EAESCDCQLQGFQLTHSLGGG K<br>TGSGMGTLLISK  | I | 3,311.53 |
| 2424 | TUBB2C Tubulin beta-2C chain                                              | IPI00007752                                     | 49,812.70 | 123 | 154 | EAESCDCQLQGFQLTHSLGGG K<br>TGSGMGTLLISK  | I | 3,327.53 |
| 2425 | TUBB Tubulin beta chain                                                   | IPI00011654                                     | 49,652.60 | 123 | 154 | EAESCDCQLQGFQLTHSLGGG K<br>TGSGMGTLLISK  | I | 3,327.53 |
| 2426 | TUBB Tubulin beta chain                                                   | IPI00011654                                     | 49,652.60 | 123 | 154 | EAESCDCQLQGFQLTHSLGGG K<br>TGSGMGTLLISK  | I | 3,311.53 |
| 2427 | TUBB Tubulin beta chain                                                   | IPI00011654                                     | 49,652.60 | 123 | 154 | EAESCDCQLQGFQLTHSLGGG K<br>TGSGMGTLLISK  | I | 3,327.53 |
| 2428 | TUBB2A Tubulin beta-2A chain                                              | IPI00013475,IPI00031370                         | 49,889.10 | 123 | 154 | ESESCDCQLQGFQLTHSLGGG K<br>TGSGMGTLLISK  | I | 3,343.52 |
| 2429 | GMNN Geminin                                                              | IPI00026309                                     | 23,547.40 | 123 | 133 | EIEQKDNEIAR K                            | L | 1,344.68 |
| 2430 | NME3 Nucleoside diphosphate kinase 3                                      | IPI00012315                                     | 18,997.20 | 123 | 131 | GDFCIEVGK R                              | N | 1,024.48 |
| 2431 | BTF3 Isoform 1 of Transcription factor BTF3                               | IPI00221035                                     | 22,150.30 | 123 | 141 | VQASLAANTFTITGHAETK K                    | Q | 1,960.01 |
| 2432 | TPI1 Isoform 1 of Triosephosphate isomerase                               | IPI00465028                                     | 30,772.80 | 123 | 136 | DCGATWVVLGHSER K                         | R | 1,586.74 |
| 2433 | APOBEC3C Probable DNA dC->dU-editing enzyme APOBEC-3C                     | IPI00555878,IPI00872929                         | 22,808.00 | 123 | 136 | LYYFQYPCYQGLR R                          | S | 1,899.87 |
| 2434 | SET Isoform 1 of Protein SET                                              | IPI00072377                                     | 33,471.40 | 123 | 132 | VEVTEFEDIK R                             | S | 1,208.60 |
| 2435 | GSTO1 Glutathione S-transferase omega-1                                   | IPI00019755,IPI00642936                         | 27,549.20 | 123 | 132 | VPSLVGSFIR K                             | S | 1,074.63 |
| 2436 | HNRNPC Isoform C1 of Heterogeneous nuclear ribonucleoproteins C1/C2       | IPI00216592,IPI00477313,IPI00909232             | 32,320.00 | 123 | 129 | MYSYPAR R                                | V | 903.4029 |
| 2437 | PDLIM1 PDZ and LIM domain protein 1                                       | IPI00010414                                     | 36,053.30 | 123 | 138 | SAMPFTASPASSTTAR R                       | V | 1,598.75 |
| 2438 | TCEA1 Isoform 1 of Transcription elongation factor A protein 1            | IPI00333215                                     | 33,952.60 | 124 | 132 | DTYVSSFPR R                              | A | 1,071.51 |
| 2439 | PGK1 Phosphoglycerate kinase 1                                            | IPI00169383                                     | 44,597.30 | 124 | 133 | FHVEEKGK R                               | D | 1,159.57 |
| 2440 | RPL23 60S ribosomal protein L23                                           | IPI00010153,IPI00795408                         | 14,847.90 | 124 | 131 | ECADLWPR K                               | I | 1,046.47 |
| 2441 | CACYBP Isoform 1 of Calcyclin-binding protein                             | IPI00395627                                     | 26,192.30 | 124 | 143 | YSMIVNLLKPISEVGSSK K                     | K | 2,166.15 |
| 2442 | RPL23A;hCG_16001 60S ribosomal protein L23a                               | IPI00021266                                     | 17,678.20 | 124 | 134 | VNTLIRPDGEK K                            | K | 1,241.69 |

|      |                                                                       |                                                 |            |     |     |                                |   |   |          |
|------|-----------------------------------------------------------------------|-------------------------------------------------|------------|-----|-----|--------------------------------|---|---|----------|
| 2443 | RPL23A;hCG_16001 60S ribosomal protein L23a                           | IPI00021266                                     | 17,678.20  | 124 | 134 | VNTLIRPDGEK                    | K | K | 1,241.69 |
| 2444 | STIP1 Stress-induced-phosphoprotein 1                                 | IPI00013894,IPI00871856                         | 62,624.10  | 124 | 136 | FMNPFNMPNLYQK                  | K | L | 1,675.76 |
| 2445 | HIST2H3A;HIST2H3D;HIST2H3C Histone H3.2                               | IPI00171611,IPI00219038,IPI00465070,IPI00909530 | 15,370.70  | 124 | 129 | DIQLAR                         | K | R | 715.4098 |
| 2446 | HIST2H3A;HIST2H3D;HIST2H3C Histone H3.2                               | IPI00171611,IPI00219038,IPI00465070,IPI00909530 | 15,370.70  | 124 | 129 | DIQLAR                         | K | R | 715.4098 |
| 2447 | GLO1 Lactoylglutathione lyase                                         | IPI00220766                                     | 20,760.80  | 124 | 140 | GFGHIGIAVPDVYSACK              | R | R | 1,790.89 |
| 2448 | TTC4 Tetratricopeptide repeat protein 4                               | IPI00000606,IPI00514593                         | 44,662.10  | 124 | 134 | AAAQYYLGNFR                    | R | S | 1,273.63 |
| 2449 | KPNA2;LOC728860 Importin subunit alpha-2                              | IPI00002214,IPI00789457                         | 57,844.50  | 124 | 130 | FVSFLGR                        | K | T | 825.4617 |
| 2450 | HNRNPA2B1 43 kDa protein                                              | IPI00874030                                     | 43,234.30  | 124 | 150 | GFGFVTFSSMAEVDAMAAR            | R | V | 2,859.32 |
| 2451 | HNRNPA2B1 43 kDa protein                                              | IPI00874030                                     | 43,234.30  | 124 | 150 | PHSIDGR<br>GFGFVTFSSMAEVDAMAAR | R | V | 2,859.32 |
| 2452 | PHB2 Prohibitin-2                                                     | IPI00027252                                     | 33,279.60  | 124 | 131 | PHSIDGR<br>LGLDYEER            | R | V | 994.4841 |
| 2453 | CACYBP Isoform 1 of Calcyclin-binding protein                         | IPI00395627                                     | 26,192.30  | 124 | 144 | YSMIVNLLKPIISVEGSSKK           | K | V | 2,310.24 |
| 2454 | G3BP1 Ras GTPase-activating protein-binding protein 1                 | IPI00012442                                     | 52,144.80  | 124 | 132 | FYVHNDIFR                      | K | Y | 1,210.60 |
| 2455 | G3BP1 Ras GTPase-activating protein-binding protein 1                 | IPI00012442                                     | 52,144.80  | 124 | 132 | FYVHNDIFR                      | K | Y | 1,210.60 |
| 2456 | PCBP2 poly(rC) binding protein 2 isoform b                            | IPI00012066,IPI00790627                         | 38,204.50  | 125 | 144 | ESTGAQVQVAGDMLPNSTER           | R | A | 2,089.98 |
| 2457 | PCBP2 poly(rC) binding protein 2 isoform b                            | IPI00012066,IPI00790627                         | 38,204.50  | 125 | 144 | ESTGAQVQVAGDMLPNSTER           | R | A | 2,105.98 |
| 2458 | PCBP1 Poly(rC)-binding protein 1                                      | IPI00016610                                     | 37,480.20  | 125 | 144 | ESTGAQVQVAGDMLPNSTER           | R | A | 2,089.98 |
| 2459 | PCBP1 Poly(rC)-binding protein 1                                      | IPI00016610                                     | 37,480.20  | 125 | 144 | ESTGAQVQVAGDMLPNSTER           | R | A | 2,105.98 |
| 2460 | UFD1L Isoform Short of Ubiquitin fusion degradation protein 1 homolog | IPI00218292,IPI00655754,IPI00873326             | 34,483.20  | 125 | 139 | FQPQSPDFLDITNPK                | K | A | 1,746.87 |
| 2461 | CD81 CD81 antigen                                                     | IPI00000190,IPI00657752                         | 25,791.80  | 125 | 144 | QFYDQALQQAVVDDANNAK            | K | A | 2,253.04 |
| 2462 | JUP Junction plakoglobin                                              | IPI00554711                                     | 81,727.90  | 125 | 142 | SAIVHLINYQDDAELATR             | K | A | 2,029.04 |
| 2463 | BUB1 Mitotic checkpoint serine/threonine-protein kinase BUB1          | IPI00783305,IPI00916549                         | 122,358.80 | 125 | 133 | GIQNQAEPR                      | R | E | 1,012.52 |
| 2464 | PSMD13 proteasome 26S non-ATPase subunit 13 isoform 2                 | IPI00375380,IPI00549672                         | 42,924.90  | 125 | 134 | LNIGDLQVTK                     | K | E | 1,100.63 |
| 2465 | EHD1 EH domain-containing protein 1                                   | IPI00017184                                     | 60,611.10  | 125 | 135 | LNAFGNAFLNR                    | K | F | 1,236.65 |
| 2466 | NCL Nucleolin                                                         | IPI00604620                                     | 76,597.90  | 125 | 132 | KGAAIPAK                       | K | G | 755.4775 |
| 2467 | RPS23 40S ribosomal protein S23                                       | IPI00218606                                     | 15,789.70  | 125 | 135 | VANVSLALYK                     | K | G | 1,190.71 |
| 2468 | TALDO1 Transaldolase                                                  | IPI00744692                                     | 37,523.70  | 125 | 138 | LIELYKEAGISKDR                 | R | I | 1,634.91 |
| 2469 | RAP1B Ras-related protein Rap-1b                                      | IPI00015148,IPI00796349                         | 20,806.90  | 125 | 136 | VVGKEQGQNLAR                   | R | Q | 1,298.72 |
| 2470 | MRPL11 39S ribosomal protein L11, mitochondrial                       | IPI00007001,IPI00333848                         | 20,665.90  | 125 | 142 | AQDEAFALQDVPLSSVVR             | K | S | 1,945.00 |
| 2471 | GRB2 Isoform 1 of Growth factor receptor-bound protein 2              | IPI00021327                                     | 25,188.80  | 125 | 136 | FNSLNELVDYHR                   | K | S | 1,506.73 |
| 2472 | ACAT2 Acetyl-CoA acetyltransferase, cytosolic                         | IPI00291419                                     | 41,332.40  | 125 | 132 | APHLAYLR                       | K | T | 940.5363 |
| 2473 | DCXR L-xylulose reductase                                             | IPI00448095,IPI00797249                         | 25,894.20  | 126 | 141 | GVPGAIVNVSSQCSQR               | R | A | 1,658.83 |
| 2474 | RPSA 33 kDa protein                                                   | IPI00413108,IPI00553164,IPI00793137,IPI00847766 | 33,295.50  | 126 | 133 | LLVVTDPK                       | R | A | 912.5514 |
| 2475 | HEBP1 Heme-binding protein 1                                          | IPI00148063                                     | 21,079.40  | 126 | 140 | EGITVYSMQFGGYAK                | R | E | 1,666.78 |
| 2476 | RBMX Heterogeneous nuclear ribonucleoprotein G                        | IPI00304692                                     | 42,315.70  | 126 | 144 | GGHMDDGGYSMNFNMSSSR            | R | G | 2,097.77 |
| 2477 | C6orf108 c-Myc-responsive protein Rcl                                 | IPI00007926                                     | 19,090.30  | 126 | 132 | VLSAMIR                        | R | G | 789.4651 |
| 2478 | GOT2 Aspartate aminotransferase, mitochondrial                        | IPI00018206                                     | 47,458.60  | 126 | 139 | FVTVQTISGTGALR                 | R | I | 1,449.81 |
| 2479 | TXNDC9 Thioredoxin domain-containing protein 9                        | IPI00022386,IPI00917664                         | 26,517.00  | 126 | 137 | LNVEKAPFLCER                   | K | L | 1,475.77 |
| 2480 | COMMD8 COMM domain-containing protein 8                               | IPI00016447,IPI00871891                         | 21,072.90  | 126 | 137 | LALSSDKIAALR                   | K | M | 1,257.75 |
| 2481 | ACTN4 Alpha-actinin-4                                                 | IPI00013808                                     | 104,839.20 | 126 | 140 | LVSIGAEIIVDGNNAK               | K | M | 1,514.81 |
| 2482 | NCL Nucleolin                                                         | IPI00604620                                     | 76,597.90  | 126 | 135 | GAAIPAKGAK                     | K | N | 883.5361 |
| 2483 | C12orf44 UPF0453 protein C12orf44                                     | IPI00305296                                     | 24,984.30  | 126 | 137 | VHVVALATEQER                   | K | Q | 1,351.73 |
| 2484 | RPS14 40S ribosomal protein S14                                       | IPI00026271                                     | 16,254.90  | 126 | 141 | IGRIEDVTPIPSDSTR               | K | R | 1,755.92 |
| 2485 | MDH1 Malate dehydrogenase, cytoplasmic                                | IPI00291005,IPI00915869                         | 36,408.90  | 126 | 142 | VIVVGNPANTNCLTASK              | K | S | 1,757.92 |

|      |                                                                   |                                     |            |     |     |                                    |   |   |          |
|------|-------------------------------------------------------------------|-------------------------------------|------------|-----|-----|------------------------------------|---|---|----------|
| 2486 | MDH1 Malate dehydrogenase, cytoplasmic                            | IPI00291005,IPI00915869             | 36,408.90  | 126 | 142 | VIVVGNPANTNCLTASK                  | K | S | 1,757.92 |
| 2487 | PPIA Peptidyl-prolyl cis-trans isomerase A                        | IPI00419585,IPI00887678             | 17,994.90  | 126 | 131 | HVVFGK                             | K | V | 686.3984 |
| 2488 | CBX3;LOC653972 Chromobox protein homolog 3                        | IPI00297579                         | 20,794.00  | 126 | 141 | IIGATDSSGELMFLMK                   | R | W | 1,728.86 |
| 2489 | YWHAH 14-3-3 protein eta                                          | IPI00216319                         | 28,201.60  | 126 | 132 | MKGDYYR                            | K | Y | 932.4295 |
| 2490 | YWHAG 14-3-3 protein gamma                                        | IPI00220642                         | 28,285.10  | 126 | 132 | MKGDYYR                            | K | Y | 932.4295 |
| 2491 | COPB1 Coatomer subunit beta                                       | IPI00295851                         | 107,128.00 | 127 | 141 | LKEAEELLEPLMPAIR                   | K | A | 1,738.98 |
| 2492 | - cDNA FLJ54554, highly similar to Pyruvate kinase isozymes M1/M2 | IPI00910979                         | 56,255.30  | 127 | 136 | ITLDNAYMEK                         | K | C | 1,197.58 |
| 2493 | FDPS Farnesyl pyrophosphate synthetase                            | IPI00914566                         | 48,258.70  | 127 | 135 | GLTVVVAFR                          | R | E | 961.5829 |
| 2494 | HNRNPA3 Isoform 1 of Heterogeneous nuclear ribonucleoprotein A3   | IPI00419373                         | 39,577.10  | 127 | 134 | KIFVGGIK                           | K | E | 861.5558 |
| 2495 | NONO Non-POU domain-containing octamer-binding protein            | IPI00304596                         | 54,213.60  | 127 | 135 | VELDNMPLR                          | K | G | 1,086.56 |
| 2496 | CCT3 chaperonin containing TCP1, subunit 3 isoform b              | IPI00290770,IPI00553185             | 60,446.30  | 127 | 138 | KALDDMISTLKK                       | R | I | 1,362.77 |
| 2497 | CCT7 T-complex protein 1 subunit eta                              | IPI00018465                         | 59,349.80  | 127 | 135 | TATQLAVNK                          | R | I | 945.5364 |
| 2498 | NAT13 Isoform 1 of N-acetyltransferase 13                         | IPI00018627                         | 19,380.90  | 127 | 135 | FGFEIETK                           | K | K | 1,083.57 |
| 2499 | QPRT Nicotinate-nucleotide pyrophosphorylase [carboxylating]      | IPI00300086,IPI00872692             | 30,797.30  | 127 | 138 | GAGWTGHVAGTR                       | R | K | 1,169.58 |
| 2500 | TMPO Lamina-associated polypeptide 2, isoform alpha               | IPI00216230                         | 75,475.80  | 127 | 139 | YGVNPGPIVGTTTR                     | K | K | 1,330.71 |
| 2501 | TMPO Lamina-associated polypeptide 2, isoform alpha               | IPI00216230                         | 75,475.80  | 127 | 139 | YGVNPGPIVGTTTR                     | K | K | 1,330.71 |
| 2502 | BUB3 Mitotic checkpoint protein BUB3                              | IPI00013468,IPI00514701,IPI00644108 | 37,136.70  | 127 | 149 | TPCNAGTFSQPEKVYTLSSVS<br>GDR       | R | L | 2,514.19 |
| 2503 | NAT13 Isoform 1 of N-acetyltransferase 13                         | IPI00018627                         | 19,380.90  | 127 | 136 | FGFEIETKK                          | K | N | 1,211.67 |
| 2504 | HSPA1A;HSPA1B Heat shock 70 kDa protein 1                         | IPI00304925                         | 70,036.00  | 127 | 155 | MKEIAEAYLGYPVTVNAVITVPA<br>YFNDSQR | K | Q | 3,276.62 |
| 2505 | LRRC59 Leucine-rich repeat-containing protein 59                  | IPI00396321                         | 34,913.40  | 127 | 138 | VAGDCLDEKQCK                       | K | Q | 1,422.64 |
| 2506 | HSPA8 Isoform 1 of Heat shock cognate 71 kDa protein              | IPI00003865                         | 70,881.80  | 127 | 137 | MKEIAEAYLGK                        | K | T | 1,268.66 |
| 2507 | BUB3 Mitotic checkpoint protein BUB3                              | IPI00013468,IPI00514701,IPI00644108 | 37,136.70  | 127 | 139 | TPCNAGTFSQPEK                      | R | V | 1,436.65 |
| 2508 | H1FX Histone H1x                                                  | IPI00021924                         | 22,469.90  | 128 | 143 | RGAPAAATAPAPTAHK                   | R | A | 1,487.81 |
| 2509 | ARPC2 Actin-related protein 2/3 complex subunit 2                 | IPI00005161                         | 34,315.70  | 128 | 141 | YFQEQEEGKEGENR                     | K | A | 1,760.79 |
| 2510 | HNRNPA3 Isoform 1 of Heterogeneous nuclear ribonucleoprotein A3   | IPI00419373                         | 39,577.10  | 128 | 143 | IFVGGIKEDTEEYNLR                   | K | D | 1,882.95 |
| 2511 | TAGLN2 Transgelin-2                                               | IPI00550363                         | 22,373.90  | 128 | 139 | TLMNLGGLAVAR                       | R | D | 1,215.69 |
| 2512 | YWHAB Isoform Short of 14-3-3 protein beta/alpha                  | IPI00759832                         | 27,832.80  | 128 | 158 | YLSEVASGDNKQTTVNSQQ<br>AYQEAFEISK  | R | E | 3,450.67 |
| 2513 | NACA Nascent polypeptide-associated complex subunit alpha         | IPI00023748,IPI00797126,IPI00797259 | 23,365.30  | 128 | 142 | IEDLSQQAQLAAAEK                    | K | F | 1,614.83 |
| 2514 | NACA Nascent polypeptide-associated complex subunit alpha         | IPI00023748,IPI00797126,IPI00797259 | 23,365.30  | 128 | 142 | IEDLSQQAQLAAAEK                    | K | F | 1,614.83 |
| 2515 | YWHAZ 14-3-3 protein zeta/delta                                   | IPI00021263                         | 27,727.90  | 128 | 139 | YLAEVAAGDDKK                       | R | G | 1,279.65 |
| 2516 | RPL7 60S ribosomal protein L7                                     | IPI00030179,IPI00472171,IPI00871827 | 29,209.70  | 128 | 134 | ASINMLR                            | K | I | 804.4396 |
| 2517 | HMGB1 High mobility group protein B1                              | IPI00419258                         | 24,876.70  | 128 | 146 | KLGEMWNNTAADDKQPYEK                | K | K | 2,254.04 |
| 2518 | YWHAZ 14-3-3 protein zeta/delta                                   | IPI00021263                         | 27,727.90  | 128 | 157 | YLAEVAAGDDKKGIVDQSQQ<br>AYQEAFEISK | R | K | 3,301.62 |
| 2519 | YWHAQ 14-3-3 protein theta                                        | IPI00018146                         | 27,747.40  | 128 | 138 | YLAEVACGDDR                        | R | K | 1,268.56 |
| 2520 | YWHAB Isoform Short of 14-3-3 protein beta/alpha                  | IPI00759832                         | 27,832.80  | 128 | 157 | YLSEVASGDNKQTTVNSQQ<br>AYQEAFEISK  | R | K | 3,322.57 |
| 2521 | UBA1 Ubiquitin-like modifier-activating enzyme 1                  | IPI00645078                         | 117,832.30 | 128 | 134 | AEVSQPR                            | R | L | 786.4104 |
| 2522 | YARS Tyrosyl-tRNA synthetase, cytoplasmic                         | IPI00007074                         | 59,127.10  | 128 | 135 | EYTLDVYR                           | K | L | 1,058.52 |
| 2523 | ARF1 ADP-ribosylation factor 1                                    | IPI00215914,IPI00215917             | 20,679.60  | 128 | 142 | QDLPNAMNAEITDK                     | K | L | 1,646.77 |
| 2524 | YWHAQ 14-3-3 protein theta                                        | IPI00018146                         | 27,747.40  | 128 | 139 | YLAEVACGDDRK                       | R | Q | 1,396.65 |
| 2525 | YWHAB Isoform Short of 14-3-3 protein beta/alpha                  | IPI00759832                         | 27,832.80  | 128 | 138 | YLSEVASGDNK                        | R | Q | 1,182.56 |
| 2526 | FARSA Phenylalanyl-tRNA synthetase alpha chain                    | IPI00031820,IPI00909657             | 57,546.50  | 128 | 138 | VVDSMEDEVQR                        | R | R | 1,322.59 |
| 2527 | PSPC1 Isoform 1 of Paraspeckle component 1                        | IPI00103525,IPI00395775             | 58,726.50  | 128 | 143 | TLAEIAKAELDGTILK                   | R | S | 1,685.97 |

|      |                                                                      |                                     |           |     |     |                                                 |   |   |          |
|------|----------------------------------------------------------------------|-------------------------------------|-----------|-----|-----|-------------------------------------------------|---|---|----------|
| 2528 | ILF2 Interleukin enhancer-binding factor 2                           | IPI00005198,IPI00872107             | 43,044.70 | 128 | 141 | ILPTLEAVALGNK                                   | K | V | 1,409.84 |
| 2529 | HNRNPA3 Isoform 1 of Heterogeneous nuclear ribonucleoprotein A3      | IPI00419373                         | 39,577.10 | 128 | 148 | IFVGGIKEDTEEYNLRDYFEK                           | K | Y | 2,565.25 |
| 2530 | BTF3L4 Transcription factor BTF3 homolog 4                           | IPI00412792                         | 17,253.00 | 129 | 158 | APKPEDIDEEDDDVPDLVENF                           | K | - | 3,359.46 |
| 2531 | BTF3L4 Transcription factor BTF3 homolog 4                           | IPI00412792                         | 17,253.00 | 129 | 158 | DEASKNEAN<br>APKPEDIDEEDDDVPDLVENF<br>DEASKNEAN | K | - | 3,359.46 |
| 2532 | H1FX Histone H1x                                                     | IPI00021924                         | 22,469.90 | 129 | 143 | GAPAAATAPAPTAHK                                 | R | A | 1,331.71 |
| 2533 | H1FX Histone H1x                                                     | IPI00021924                         | 22,469.90 | 129 | 143 | GAPAAATAPAPTAHK                                 | R | A | 1,331.71 |
| 2534 | HMGB2 High mobility group protein B2                                 | IPI00219097                         | 24,016.60 | 129 | 139 | LGEMWSEQSAK                                     | K | D | 1,265.58 |
| 2535 | PIP4K2C Phosphatidylinositol-5-phosphate 4-kinase type-2 gamma       | IPI00152303,IPI00896381             | 47,268.90 | 129 | 140 | NPPSESEGS DGR                                   | R | F | 1,231.52 |
| 2536 | PRDX1 Peroxiredoxin-1                                                | IPI00000874                         | 22,092.90 | 129 | 136 | GLFIIDDK                                        | R | G | 920.509  |
| 2537 | STUB1 Isoform 1 of STIP1 homology and U box-containing protein 1     | IPI00025156                         | 34,839.00 | 129 | 140 | LNFGDDIPSALR                                    | R | I | 1,317.68 |
| 2538 | RPS14 40S ribosomal protein S14                                      | IPI00026271                         | 16,254.90 | 129 | 142 | IEDVTPIPSDSTRR                                  | R | K | 1,585.82 |
| 2539 | HMGB1 High mobility group protein B1                                 | IPI00419258                         | 24,876.70 | 129 | 146 | LGEMWNNTAADDKQPYEK                              | K | K | 2,125.95 |
| 2540 | RAP1B Ras-related protein Rap-1b                                     | IPI00015148,IPI00796349             | 20,806.90 | 129 | 136 | EQQGNLAR                                        | K | Q | 915.4643 |
| 2541 | PRDX1 Peroxiredoxin-1                                                | IPI00000874                         | 22,092.90 | 129 | 140 | GLFIIDDKGILR                                    | R | Q | 1,359.80 |
| 2542 | FMR1 Isoform 8 of Fragile X mental retardation 1 protein             | IPI00645666                         | 66,228.40 | 129 | 138 | IKLDVPEDLR                                      | K | Q | 1,197.68 |
| 2543 | RPS14 40S ribosomal protein S14                                      | IPI00026271                         | 16,254.90 | 129 | 141 | IEDVTPIPSDSTR                                   | R | R | 1,429.72 |
| 2544 | PCTP Phosphatidylcholine transfer protein                            | IPI00296927                         | 24,826.00 | 129 | 136 | KIHVILAR                                        | R | S | 949.6306 |
| 2545 | CMPK1 cytidine monophosphate (UMP-CMP) kinase 1, cytosolic isoform a | IPI00219953                         | 25,837.80 | 129 | 138 | NQDNLQGWNK                                      | R | T | 1,216.57 |
| 2546 | RPL10 60S ribosomal protein L10                                      | IPI00554723,IPI00646899,IPI00853161 | 24,586.60 | 129 | 139 | VHIGQVIMSIR                                     | R | T | 1,268.71 |
| 2547 | ARMC1 Armadillo repeat-containing protein 1                          | IPI00018260                         | 31,263.00 | 130 | 141 | KAQFFLGTTNKR                                    | R | A | 1,410.79 |
| 2548 | HNRNPC Isoform C1 of Heterogeneous nuclear ribonucleoproteins C1/C2  | IPI00216592,IPI00477313,IPI00909232 | 32,320.00 | 130 | 138 | VPPPPPIAR                                       | R | A | 943.5725 |
| 2549 | XRCC5 ATP-dependent DNA helicase 2 subunit 2                         | IPI00220834,IPI00871391             | 82,689.10 | 130 | 141 | RHIEIFTDLSSR                                    | K | F | 1,473.78 |
| 2550 | RPS10 40S ribosomal protein S10                                      | IPI00008438                         | 18,880.30 | 130 | 153 | SAVPPGADKKAEAGAGSATE                            | R | G | 2,392.19 |
| 2551 | RPS10 40S ribosomal protein S10                                      | IPI00008438                         | 18,880.30 | 130 | 153 | FQFR<br>SAVPPGADKKAEAGAGSATE                    | R | G | 2,392.19 |
| 2552 | RPS19 40S ribosomal protein S19                                      | IPI00215780                         | 16,042.50 | 130 | 143 | FQFR<br>DLDRIAGQVAAANK                          | R | K | 1,441.78 |
| 2553 | GIN5 DNA replication complex GINS protein PSF2                       | IPI00007146                         | 21,410.80 | 130 | 137 | VSADSFVR                                        | R | Q | 880.4522 |
| 2554 | VIM Vimentin                                                         | IPI00418471                         | 53,634.60 | 130 | 143 | ILLAELEQLKGQ GK                                 | K | S | 1,539.91 |
| 2555 | PSMG2 Proteasome assembly chaperone 2                                | IPI00644482                         | 29,379.40 | 130 | 135 | NDLQLR                                          | R | S | 758.4156 |
| 2556 | UBE2N Ubiquitin-conjugating enzyme E2 N                              | IPI00003949                         | 17,120.60 | 131 | 141 | TNEAQAIETAR                                     | K | A | 1,203.60 |
| 2557 | LASP1 Isoform 1 of LIM and SH3 domain protein 1                      | IPI00000861,IPI00386803,IPI00883946 | 29,698.80 | 131 | 144 | MGPSGGEGMEPERR                                  | R | D | 1,521.64 |
| 2558 | TCP1 T-complex protein 1 subunit alpha                               | IPI00290566                         | 60,327.20 | 131 | 145 | YINENLIVNTDELGR                                 | R | D | 1,762.90 |
| 2559 | RAB2B Ras-related protein Rab-2B                                     | IPI00102896                         | 24,197.10 | 131 | 139 | REEGEAFAR                                       | K | E | 1,064.51 |
| 2560 | FN3KRP Ketosamine-3-kinase                                           | IPI00099986                         | 34,394.70 | 131 | 142 | GGGQEERPFVAR                                    | R | F | 1,302.66 |
| 2561 | HNRNPA1 Isoform A1-B of Heterogeneous nuclear ribonucleoprotein A1   | IPI00215965,IPI00465365             | 38,828.10 | 131 | 140 | IEVIEIMTDR                                      | K | G | 1,234.64 |
| 2562 | BUD31 Protein BUD31 homolog                                          | IPI00013180                         | 16,982.30 | 131 | 140 | IIECTHCGCR                                      | R | G | 1,305.55 |
| 2563 | CLIC4 Chloride intracellular channel protein 4                       | IPI00001960                         | 28,755.60 | 131 | 142 | NSRPEANEALER                                    | K | G | 1,385.68 |
| 2564 | DNAJA1 DnaJ homolog subfamily A member 1                             | IPI00012535                         | 44,850.60 | 131 | 140 | NVICDKCEGR                                      | K | G | 1,250.56 |
| 2565 | RPL12 Isoform 1 of 60S ribosomal protein L12                         | IPI00024933                         | 17,801.10 | 131 | 146 | EILGTAQSVGCNVDGR                                | K | H | 1,675.81 |
| 2566 | RPL12 Isoform 1 of 60S ribosomal protein L12                         | IPI00024933                         | 17,801.10 | 131 | 146 | EILGTAQSVGCNVDGR                                | K | H | 1,675.81 |
| 2567 | SMAD5 Mothers against decapentaplegic homolog 5                      | IPI00017730,IPI00903182             | 52,239.90 | 131 | 143 | VESFVLPVLPVPR                                   | R | H | 1,401.85 |
| 2568 | MCM6 DNA replication licensing factor MCM6                           | IPI00031517                         | 92,872.60 | 131 | 136 | IGLLTR                                          | R | I | 672.4404 |
| 2569 | KPNA1 Importin subunit alpha-1                                       | IPI00303292                         | 60,232.00 | 131 | 137 | FVEFLKR                                         | R | K | 938.5458 |
| 2570 | RPL6 60S ribosomal protein L6                                        | IPI00329389,IPI00790342,IPI00867533 | 32,711.30 | 131 | 138 | KPFSQHVR                                        | K | K | 998.553  |



|      |                                                                           |                                                             |           |     |     |                        |   |   |          |
|------|---------------------------------------------------------------------------|-------------------------------------------------------------|-----------|-----|-----|------------------------|---|---|----------|
| 2571 | YWHAE 14-3-3 protein epsilon                                              | IPI00000816                                                 | 29,157.00 | 131 | 141 | YLAEFATGNDR            | R | K | 1,256.59 |
| 2572 | TXNDC9 Thioredoxin domain-containing protein 9                            | IPI00022386,IPI00917664                                     | 26,517.00 | 131 | 137 | APFLCER                | K | L | 892.4346 |
| 2573 | EEF1B2 Elongation factor 1-beta                                           | IPI00178440                                                 | 24,746.20 | 131 | 139 | AKKPALVAK              | K | S | 925.6194 |
| 2574 | CALD1 Isoform 5 of Caldesmon                                              | IPI00333771                                                 | 61,195.30 | 131 | 146 | MQNDTAENETTEKEEK       | R | S | 1,912.81 |
| 2575 | NIT2 Nitrilase homolog 2                                                  | IPI00549467,IPI00872668                                     | 30,590.80 | 131 | 147 | TLSPGDSFSTFDTPYCR      | K | V | 1,950.85 |
| 2576 | ARL5B ADP-ribosylation factor-like protein 5B                             | IPI00102036                                                 | 20,357.10 | 131 | 140 | GCMTAAEISK             | K | Y | 1,067.49 |
| 2577 | RPS16 40S ribosomal protein S16                                           | IPI00221092                                                 | 16,427.90 | 132 | 138 | FGGPGAR                | K | A | 661.3417 |
| 2578 | SERPINB6 Putative uncharacterized protein DKFZp686I04222                  | IPI00413451,IPI00749398                                     | 46,353.40 | 132 | 140 | SCDFLSSFR              | K | D | 1,118.49 |
| 2579 | SF3A1 Splicing factor 3 subunit 1                                         | IPI00017451                                                 | 88,868.10 | 132 | 144 | VQAQVIQETIVPK          | K | E | 1,452.84 |
| 2580 | PPIA Peptidyl-prolyl cis-trans isomerase A                                | IPI00419585,IPI00887678                                     | 17,994.90 | 132 | 144 | VKEGMNIVEAMER          | K | F | 1,505.75 |
| 2581 | PPIA Peptidyl-prolyl cis-trans isomerase A                                | IPI00419585,IPI00887678                                     | 17,994.90 | 132 | 144 | VKEGMNIVEAMER          | K | F | 1,537.74 |
| 2582 | PRMT1 HMT1 hnRNP methyltransferase-like 2 isoform 1                       | IPI00018522,IPI00215734,IPI00382516,IPI00909470,IPI00914913 | 42,444.20 | 132 | 143 | ANKLDHVVTIIK           | K | G | 1,350.81 |
| 2583 | C14orf166 UPF0568 protein C14orf166                                       | IPI00006980                                                 | 28,051.30 | 132 | 145 | AGVMALANLLQIQR         | K | H | 1,513.85 |
| 2584 | HN1L Isoform 1 of Hematological and neurological expressed 1-like protein | IPI00027397,IPI00909195                                     | 20,045.60 | 132 | 146 | SIPAGAEPGEKGSAR        | R | K | 1,426.73 |
| 2585 | CCDC97 Coiled-coil domain-containing protein 97                           | IPI00061777                                                 | 38,928.70 | 132 | 141 | ADFYCAEVAR             | R | Q | 1,201.53 |
| 2586 | SFRS6 Isoform SRP55-1 of Splicing factor, arginine/serine-rich 6          | IPI00012345,IPI00215879,IPI00556297                         | 39,570.40 | 132 | 145 | QAGEVTYADAHKER         | R | T | 1,574.76 |
| 2587 | DRG2 Developmentally-regulated GTP-binding protein 2                      | IPI00022697,IPI00794194                                     | 40,729.80 | 132 | 138 | QVIAVAR                | R | T | 756.4726 |
| 2588 | CTTN Src substrate cortactin                                              | IPI00029601                                                 | 61,567.40 | 132 | 144 | VDQSAVGFQYQGK          | R | T | 1,427.68 |
| 2589 | NANS Sialic acid synthase                                                 | IPI00147874                                                 | 40,289.90 | 132 | 145 | VGSGDTNNFPYLEK         | K | T | 1,540.73 |
| 2590 | SNRNP40 cDNA FLJ56825, highly similar to WD repeat protein 57             | IPI00006723                                                 | 44,498.40 | 132 | 143 | TVAVWDSSETGER          | K | V | 1,349.63 |
| 2591 | TOMM20 Mitochondrial import receptor subunit TOM20 homolog                | IPI00016676                                                 | 16,280.30 | 133 | 145 | IVSAQSLAEDDVE          | R | - | 1,375.66 |
| 2592 | WIBG Isoform 1 of Protein wibg homolog                                    | IPI00305092,IPI00790634,IPI00914992                         | 22,637.90 | 133 | 150 | AAPTAASDQPDSAAATTEK    | R | A | 1,731.80 |
| 2593 | MOSC1 Isoform 1 of MOSC domain-containing protein 1, mitochondrial        | IPI00305258,IPI00828198                                     | 37,482.00 | 133 | 148 | LLLLPIKTPPTTNAVHK      | K | C | 1,761.03 |
| 2594 | CFL1 Cofilin-1                                                            | IPI00012011                                                 | 18,485.10 | 133 | 146 | HELQANCYEEVKDR         | K | C | 1,790.81 |
| 2595 | RAC1 Isoform A of Ras-related C3 botulinum toxin substrate 1              | IPI00010271,IPI00219675                                     | 21,432.60 | 133 | 147 | KLTPITYPQGLAMAK        | K | E | 1,647.91 |
| 2596 | PAFAH1B3 Platelet-activating factor acetylhydrolase IB subunit gamma      | IPI00014808                                                 | 25,715.60 | 133 | 141 | VVVLGLLPR              | R | G | 965.6507 |
| 2597 | PAFAH1B3 Platelet-activating factor acetylhydrolase IB subunit gamma      | IPI00014808                                                 | 25,715.60 | 133 | 141 | VVVLGLLPR              | R | G | 965.6507 |
| 2598 | LCP1 Plastin-2                                                            | IPI00010471                                                 | 70,274.10 | 133 | 141 | ALENDPDCR              | K | H | 1,089.46 |
| 2599 | TXNL1 Thioredoxin-like protein 1                                          | IPI00305692,IPI00642032                                     | 32,233.40 | 133 | 151 | AGCECLNESDEHGFNDCLR    | K | K | 2,282.89 |
| 2600 | TES Isoform 1 of Testin                                                   | IPI00024097,IPI00216425,IPI00873055                         | 47,977.60 | 133 | 146 | EKQPVAGSEGAQYR         | K | K | 1,519.75 |
| 2601 | PTPLAD1 Protein tyrosine phosphatase-like protein PTPLAD1                 | IPI00008998                                                 | 43,143.10 | 133 | 146 | LESEGSPETLTNLR         | R | K | 1,545.78 |
| 2602 | PTPLAD1 Protein tyrosine phosphatase-like protein PTPLAD1                 | IPI00008998                                                 | 43,143.10 | 133 | 146 | LESEGSPETLTNLR         | R | K | 1,545.78 |
| 2603 | PRDX6 Peroxiredoxin-6                                                     | IPI00220301                                                 | 25,018.10 | 133 | 141 | VVVFVGPDK              | R | K | 1,007.56 |
| 2604 | TCEA1 Isoform 1 of Transcription elongation factor A protein 1            | IPI00333215                                                 | 33,952.60 | 133 | 141 | APSTSDSVR              | R | L | 919.4479 |
| 2605 | RPS3 40S ribosomal protein S3                                             | IPI00011253                                                 | 26,670.50 | 133 | 141 | GCEVVVSGK              | K | L | 934.4663 |
| 2606 | ENO1 Isoform alpha-enolase of Alpha-enolase                               | IPI00465248                                                 | 47,152.20 | 133 | 162 | HIADLAGNSEVILPVPAFNVIN | R | L | 3,011.57 |
| 2607 | DDX17 DEAD box polypeptide 17 isoform 1                                   | IPI00023785,IPI00651653                                     | 80,256.00 | 133 | 143 | GGSHAGNK               |   |   |          |
| 2608 | PRDX6 Peroxiredoxin-6                                                     | IPI00220301                                                 | 25,018.10 | 133 | 142 | NFYVEHPEVAR            | K | L | 1,360.66 |
| 2609 | PRDX6 Peroxiredoxin-6                                                     | IPI00220301                                                 | 25,018.10 | 133 | 142 | VVVFVGPDKK             | R | L | 1,135.65 |
| 2610 | TBCB Tubulin folding cofactor B                                           | IPI00293126                                                 | 27,307.50 | 133 | 148 | YNEEERAQQEAEAAQR       | R | L | 1,921.86 |
| 2611 | YWHAH 14-3-3 protein eta                                                  | IPI00216319                                                 | 28,201.60 | 133 | 143 | YLAEVASGEKK            | R | N | 1,194.64 |
| 2612 | PPP1CA Serine/threonine-protein phosphatase PP1-alpha catalytic subunit   | IPI00550451                                                 | 37,495.90 | 133 | 141 | IYGFYDECK              | R | R | 1,194.51 |



|      |                                                                                                   |                                                             |           |     |     |                                 |   |   |          |
|------|---------------------------------------------------------------------------------------------------|-------------------------------------------------------------|-----------|-----|-----|---------------------------------|---|---|----------|
| 2613 | YWHAG 14-3-3 protein gamma                                                                        | IPI00220642                                                 | 28,285.10 | 133 | 142 | YLAEVATGEK                      | R | R | 1,080.56 |
| 2614 | EEF1B2 Elongation factor 1-beta                                                                   | IPI00178440                                                 | 24,746.20 | 133 | 139 | KPALVAK                         | K | S | 726.4873 |
| 2615 | NOSIP Nitric oxide synthase-interacting protein                                                   | IPI00006408                                                 | 33,154.00 | 133 | 157 | ALSGTSPDDVQPGPSVGPSS<br>KDKDK   | K | V | 2,479.23 |
| 2616 | PBK cDNA FLJ58333, highly similar to T-lymphokine-activated killer cell-originated protein kinase | IPI00306708                                                 | 37,194.90 | 133 | 145 | ASQDPFPAAILK                    | K | V | 1,370.77 |
| 2617 | CCT5 T-complex protein 1 subunit epsilon                                                          | IPI00010720,IPI00910316                                     | 59,654.30 | 133 | 142 | IADGYEQAAR                      | R | V | 1,093.53 |
| 2618 | RPS13 40S ribosomal protein S13                                                                   | IPI00221089                                                 | 17,205.30 | 133 | 140 | RVLPPNWK                        | K | Y | 1,009.59 |
| 2619 | PPP6C Serine/threonine-protein phosphatase 6 catalytic subunit                                    | IPI00012970,IPI00890743,IPI00890827                         | 35,126.80 | 133 | 140 | YGNANAWR                        | K | Y | 951.443  |
| 2620 | RPS19 40S ribosomal protein S19                                                                   | IPI00215780                                                 | 16,042.50 | 134 | 144 | IAGQVAAANKK                     | R | - | 1,070.63 |
| 2621 | YRDC YrdC domain-containing protein, mitochondrial                                                | IPI00384180                                                 | 29,310.30 | 134 | 142 | VRVPEGLLK                       | R | D | 1,010.64 |
| 2622 | PHB Prohibitin                                                                                    | IPI00017334,IPI00791634                                     | 29,786.60 | 134 | 143 | FDAGELITQR                      | R | E | 1,149.59 |
| 2623 | RAC3 Ras-related C3 botulinum toxin substrate 3                                                   | IPI00023138                                                 | 21,361.10 | 134 | 147 | LAPITYPQGLAMAR                  | K | E | 1,517.81 |
| 2624 | RAC1 Isoform A of Ras-related C3 botulinum toxin substrate 1                                      | IPI00010271,IPI00219675                                     | 21,432.60 | 134 | 147 | LTPITYPQGLAMAK                  | K | E | 1,519.82 |
| 2625 | RAC1 Isoform A of Ras-related C3 botulinum toxin substrate 1                                      | IPI00010271,IPI00219675                                     | 21,432.60 | 134 | 147 | LTPITYPQGLAMAK                  | K | E | 1,519.82 |
| 2626 | PPIA Peptidyl-prolyl cis-trans isomerase A                                                        | IPI00419585,IPI00887678                                     | 17,994.90 | 134 | 144 | EGMNIVEAMER                     | K | F | 1,294.58 |
| 2627 | PAFAH1B2 Platelet-activating factor acetylhydrolase IB subunit beta                               | IPI00026546                                                 | 25,551.50 | 134 | 142 | IIVLGLLPR                       | K | G | 993.6821 |
| 2628 | PAFAH1B2 Platelet-activating factor acetylhydrolase IB subunit beta                               | IPI00026546                                                 | 25,551.50 | 134 | 142 | IIVLGLLPR                       | K | G | 993.6821 |
| 2629 | EIF2B3 Isoform 1 of Translation initiation factor eIF-2B subunit gamma                            | IPI00006504                                                 | 50,223.30 | 134 | 146 | KGQDSIEPVPQK                    | R | G | 1,382.73 |
| 2630 | SEC22B Vesicle-trafficking protein SEC22b                                                         | IPI00006865                                                 | 24,723.40 | 134 | 147 | NLGSINTELQDVQR                  | R | I | 1,586.81 |
| 2631 | RPS19 40S ribosomal protein S19                                                                   | IPI00215780                                                 | 16,042.50 | 134 | 143 | IAGQVAAANK                      | R | K | 942.5367 |
| 2632 | SELS Selenoprotein S                                                                              | IPI00020468,IPI00793181,IPI00916735                         | 21,098.40 | 134 | 151 | KPQEEDSPGPSTSSVLKR              | K | K | 1,941.99 |
| 2633 | HNRNPR heterogeneous nuclear ribonucleoprotein R isoform 1                                        | IPI00644055                                                 | 71,197.20 | 134 | 145 | TGYTLDVTTGQR                    | R | K | 1,311.65 |
| 2634 | HNRNPR heterogeneous nuclear ribonucleoprotein R isoform 1                                        | IPI00644055                                                 | 71,197.20 | 134 | 145 | TGYTLDVTTGQR                    | R | K | 1,311.65 |
| 2635 | CDC2 Putative uncharacterized protein DKFZp686L2022                                               | IPI00026689                                                 | 34,762.10 | 134 | 149 | DLKPNLLIDDKGTIK                 | R | L | 1,811.03 |
| 2636 | KPNA6 cDNA FLJ53229, highly similar to Importin alpha-7 subunit                                   | IPI00747764                                                 | 60,563.50 | 134 | 140 | FVEFLKR                         | R | N | 938.5458 |
| 2637 | AP1S1 Isoform 1 of AP-1 complex subunit sigma-1A                                                  | IPI00152898                                                 | 18,715.90 | 134 | 149 | AIEQADLLQEEDESPR                | K | S | 1,842.87 |
| 2638 | ZNF503 Isoform 1 of Zinc finger protein 503                                                       | IPI00304992                                                 | 62,538.00 | 134 | 158 | LSSVASNGGGAGGAGGGAA<br>GDKDTK   | K | S | 2,061.98 |
| 2639 | SERPINH1 Serpin H1                                                                                | IPI00032140                                                 | 46,424.00 | 134 | 148 | LYGPSSVSFADDFVR                 | R | S | 1,659.80 |
| 2640 | DRG1 Developmentally-regulated GTP-binding protein 1                                              | IPI00031836                                                 | 40,525.80 | 134 | 140 | QVIAVAR                         | R | T | 756.4726 |
| 2641 | ATP5A1 ATP synthase subunit alpha, mitochondrial                                                  | IPI00440493                                                 | 59,734.10 | 134 | 149 | TGAIVDVPVGEELLGR                | R | V | 1,624.89 |
| 2642 | RPSA 33 kDa protein                                                                               | IPI00413108,IPI00553164,IPI00793137,IPI00847766             | 33,295.50 | 134 | 160 | ADHQLPTEASYVNLPTIALCN<br>TDSPLR | R | Y | 2,996.48 |
| 2643 | NDUFA12 13kDa differentiation-associated protein variant (Fragment)                               | IPI00005966                                                 | 17,196.50 | 135 | 146 | IQEWIPPSTPYK                    | K | - | 1,458.76 |
| 2644 | RPL26 60S ribosomal protein L26                                                                   | IPI00027270                                                 | 17,240.40 | 135 | 145 | YKEETIEKMQE                     | K | - | 1,443.67 |
| 2645 | PTBP1 Isoform 1 of Polypyrimidine tract-binding protein 1                                         | IPI00179964,IPI00183626,IPI00334175                         | 57,204.50 | 135 | 146 | ELKTDSSPNQAR                    | K | A | 1,345.67 |
| 2646 | CBR1 Carbonyl reductase [NADPH] 1                                                                 | IPI00295386                                                 | 30,356.80 | 135 | 145 | VVNVSIMSVMR                     | R | A | 1,190.66 |
| 2647 | BZW1 Isoform 2 of Basic leucine zipper and W2 domain-containing protein 1                         | IPI00180128,IPI00785096,IPI00916112,IPI00916503,IPI00918019 | 40,522.00 | 135 | 140 | LLLFLK                          | K | G | 746.5176 |
| 2648 | RPLP0 60S acidic ribosomal protein P0                                                             | IPI00008530                                                 | 34,256.30 | 135 | 146 | TSFFQALGITTK                    | K | I | 1,313.71 |
| 2649 | EEF1A2 Elongation factor 1-alpha 2                                                                | IPI00014424                                                 | 50,452.60 | 135 | 146 | EHALLAYTLGVK                    | R | Q | 1,314.74 |
| 2650 | EEF1A1 Elongation factor 1-alpha 1                                                                | IPI00396485                                                 | 50,123.20 | 135 | 146 | EHALLAYTLGVK                    | R | Q | 1,314.74 |

|      |                                                                                |                                                             |           |     |     |                           |   |   |          |
|------|--------------------------------------------------------------------------------|-------------------------------------------------------------|-----------|-----|-----|---------------------------|---|---|----------|
| 2651 | EEF1A1 Elongation factor 1-alpha 1                                             | IPI00396485                                                 | 50,123.20 | 135 | 146 | EHALLAYTLGVK              | R | Q | 1,314.74 |
| 2652 | RPL7 60S ribosomal protein L7                                                  | IPI00030179,IPI00472171,IPI00871827                         | 29,209.70 | 135 | 148 | IVEPYIAWGYPNLK            | R | S | 1,662.89 |
| 2653 | NPM1 Isoform 2 of Nucleophosmin                                                | IPI00220740,IPI00549248                                     | 29,446.90 | 135 | 142 | LLSISGKR                  | K | S | 873.5517 |
| 2654 | PITPNB Isoform 1 of Phosphatidylinositol transfer protein beta isoform         | IPI00334907                                                 | 31,522.30 | 135 | 146 | TVEIVHIDIADR              | K | S | 1,380.75 |
| 2655 | PTRH2 Peptidyl-tRNA hydrolase 2, mitochondrial                                 | IPI00032903,IPI00555597                                     | 19,175.70 | 135 | 148 | MLGLTVSLIQDAGR            | K | T | 1,473.81 |
| 2656 | - cDNA FLJ52712, highly similar to Tubulin beta-6 chain                        | IPI00908469                                                 | 46,683.90 | 135 | 146 | IMNTFSVMPSPK              | R | V | 1,367.67 |
| 2657 | STMN1 Stathmin                                                                 | IPI00479997                                                 | 17,285.00 | 136 | 149 | NKESKDPADETead            | K | - | 1,548.67 |
| 2658 | PSMD10 26S proteasome non-ATPase regulatory subunit 10                         | IPI00003565,IPI00027699                                     | 24,410.20 | 136 | 145 | DHYEATAMHR                | K | A | 1,230.53 |
| 2659 | UBE2S Ubiquitin-conjugating enzyme E2 S                                        | IPI00217949                                                 | 23,828.40 | 136 | 147 | LLLENYEEYAAR              | R | A | 1,483.74 |
| 2660 | UBE2S Ubiquitin-conjugating enzyme E2 S                                        | IPI00217949                                                 | 23,828.40 | 136 | 147 | LLLENYEEYAAR              | R | A | 1,483.74 |
| 2661 | BZW2 Basic leucine zipper and W2 domain-containing protein 2                   | IPI00022305,IPI00894416                                     | 48,146.00 | 136 | 141 | LLLFLK                    | K | A | 746.5176 |
| 2662 | CDC123 Cell division cycle protein 123 homolog                                 | IPI00005670                                                 | 39,118.10 | 136 | 142 | SSDFITR                   | K | D | 825.4101 |
| 2663 | PLS3 plastin 3                                                                 | IPI00216694                                                 | 70,795.90 | 136 | 144 | ALENDPDCR                 | K | H | 1,089.46 |
| 2664 | PLS3 plastin 3                                                                 | IPI00216694                                                 | 70,795.90 | 136 | 144 | ALENDPDCR                 | K | H | 1,089.46 |
| 2665 | NUP37 Nucleoporin Nup37                                                        | IPI00171665                                                 | 36,689.20 | 136 | 150 | EGQEIASVSDHTCR            | K | I | 1,703.73 |
| 2666 | DDRKG1 Isoform 1 of Uncharacterized protein C20orf116                          | IPI00028387                                                 | 35,593.00 | 136 | 145 | EAEAEEREER                | R | K | 1,247.55 |
| 2667 | PSMD4 Isoform Rpn10A of 26S proteasome non-ATPase regulatory subunit 4         | IPI00022694                                                 | 40,719.20 | 136 | 152 | VNVDIINFGEDEVNTEK         | K | L | 1,948.95 |
| 2668 | COMT Isoform Membrane-bound of Catechol O-methyltransferase                    | IPI00011284,IPI00375513                                     | 30,019.60 | 136 | 151 | LITIEINPDCAAITQR          | R | M | 1,827.96 |
| 2669 | GNB2L1 38 kDa protein                                                          | IPI00641950,IPI00848226                                     | 37,740.10 | 136 | 147 | DVLSVAFSSDNR              | K | Q | 1,309.64 |
| 2670 | GNB2L1 38 kDa protein                                                          | IPI00641950,IPI00848226                                     | 37,740.10 | 136 | 147 | DVLSVAFSSDNR              | K | Q | 1,309.64 |
| 2671 | ARL2BP Isoform 1 of ADP-ribosylation factor-like protein 2-binding protein     | IPI00015866,IPI00845377                                     | 18,805.20 | 136 | 150 | GLDLSGLVVTSLCK            | R | S | 1,548.83 |
| 2672 | CAPNS1 Calpain small subunit 1                                                 | IPI00025084                                                 | 28,298.60 | 136 | 145 | TDGFGIDTCR                | K | S | 1,141.49 |
| 2673 | CCDC124 Coiled-coil domain-containing protein 124                              | IPI00060627                                                 | 25,817.70 | 136 | 145 | VLEEGSVEAR                | R | T | 1,088.56 |
| 2674 | CCDC124 Coiled-coil domain-containing protein 124                              | IPI00060627                                                 | 25,817.70 | 136 | 145 | VLEEGSVEAR                | R | T | 1,088.56 |
| 2675 | UCHL1 Ubiquitin carboxyl-terminal hydrolase isozyme L1                         | IPI00018352                                                 | 24,806.30 | 136 | 153 | NEAIQAAHDAVAQEGQCR        | K | V | 1,967.90 |
| 2676 | RPS5 40S ribosomal protein S5                                                  | IPI00008433                                                 | 22,859.00 | 136 | 146 | RQAVDV SPLRR              | R | V | 1,296.75 |
| 2677 | ANXA2P2 Putative annexin A2-like protein                                       | IPI00334627,IPI00455315                                     | 38,642.90 | 136 | 145 | TNQLQEINR                 | R | V | 1,244.62 |
| 2678 | PPP2CA Serine/threonine-protein phosphatase 2A catalytic subunit alpha isoform | IPI00008380                                                 | 35,576.50 | 136 | 144 | KYGNANVWK                 | R | Y | 1,079.56 |
| 2679 | ARD1A N-terminal acetyltransferase complex ARD1 subunit homolog A              | IPI00013184                                                 | 26,441.00 | 137 | 149 | YYADGEDAYAMKR             | K | D | 1,568.67 |
| 2680 | HNRNPD Isoform 1 of Heterogeneous nuclear ribonucleoprotein D0                 | IPI00028888,IPI00220684                                     | 38,416.50 | 137 | 146 | SRGFGFVLFK                | R | E | 1,157.65 |
| 2681 | NDUFB10 NADH dehydrogenase [ubiquinone] 1 beta subcomplex subunit 10           | IPI00479905                                                 | 20,758.70 | 137 | 147 | YQDLGAYSSAR               | R | K | 1,230.57 |
| 2682 | - Ribosomal protein S27                                                        | IPI00397358,IPI00513971,IPI00746004,IPI00888491,IPI00888789 | 16,859.90 | 137 | 144 | LTEGCSFR                  | R | R | 969.4459 |
| 2683 | RAP1B Ras-related protein Rap-1b                                               | IPI00015148,IPI00796349                                     | 20,806.90 | 137 | 149 | QWNNCAFLESSAK             | R | S | 1,554.70 |
| 2684 | RQCD1 Cell differentiation protein RCD1 homolog                                | IPI00023101                                                 | 33,614.20 | 137 | 148 | LTSLGVIGALVK              | R | T | 1,170.75 |
| 2685 | SET Isoform 1 of Protein SET                                                   | IPI00072377                                                 | 33,471.40 | 137 | 150 | IDFYFDENPYFENK            | R | V | 1,840.81 |
| 2686 | TPI1 Isoform 1 of Triosephosphate isomerase                                    | IPI00465028                                                 | 30,772.80 | 137 | 150 | RHVFGEDELIGQK             | R | V | 1,614.82 |
| 2687 | UCHL3 Ubiquitin carboxyl-terminal hydrolase isozyme L3                         | IPI00011250                                                 | 26,164.80 | 137 | 145 | YLENYDAIR                 | R | V | 1,156.56 |
| 2688 | PPP2CA Serine/threonine-protein phosphatase 2A catalytic subunit alpha isoform | IPI00008380                                                 | 35,576.50 | 137 | 144 | YGNANVWK                  | K | Y | 951.4682 |
| 2689 | PPP2CA Serine/threonine-protein phosphatase 2A catalytic subunit alpha isoform | IPI00008380                                                 | 35,576.50 | 137 | 144 | YGNANVWK                  | K | Y | 951.4682 |
| 2690 | CCT3 chaperonin containing TCP1, subunit 3 isoform b                           | IPI00290770,IPI00553185                                     | 60,446.30 | 138 | 162 | KISIPVDISDSMMLNIINSSIT TK | K | A | 2,767.41 |

|      |                                                                                         |                                                 |           |     |     |                                  |   |   |          |
|------|-----------------------------------------------------------------------------------------|-------------------------------------------------|-----------|-----|-----|----------------------------------|---|---|----------|
| 2691 | SGTA Small glutamine-rich tetratricopeptide repeat-containing protein alpha             | IPI00013949                                     | 34,045.90 | 138 | 150 | LGNYAGAVQDCER                    | K | A | 1,452.65 |
| 2692 | NP cDNA FLJ25678 fis, clone TST04067, highly similar to PURINE NUCLEOSIDE PHOSPHORYLASE | IPI00017672,IPI00871140                         | 32,533.50 | 138 | 158 | DHINLPGFSGQNPLRGPNDER            | R | F | 2,333.14 |
| 2693 | GNB1 Guanine nucleotide-binding protein G(I)/G(S)/G(T) subunit beta-1                   | IPI00026268                                     | 37,359.50 | 138 | 150 | ELAGHTGYLSCCR                    | R | F | 1,523.67 |
| 2694 | GNB2 Guanine nucleotide-binding protein G(I)/G(S)/G(T) subunit beta-2                   | IPI00003348                                     | 37,313.80 | 138 | 150 | ELPGHTGYLSCCR                    | R | F | 1,549.69 |
| 2695 | PCNP Isoform 1 of PEST proteolytic signal-containing nuclear protein                    | IPI00291608,IPI00796456                         | 18,907.40 | 138 | 150 | DTPTSAGPNSFNK                    | R | G | 1,335.62 |
| 2696 | AGK Isoform 1 of Acylglycerol kinase, mitochondrial                                     | IPI00019353                                     | 47,120.00 | 138 | 146 | RTDEATFSK                        | R | I | 1,054.52 |
| 2697 | RPL7A 60S ribosomal protein L7a                                                         | IPI00299573                                     | 29,978.30 | 138 | 150 | AGVNTVTTLVENK                    | R | K | 1,345.73 |
| 2698 | KIAA0174 Isoform 1 of Uncharacterized protein KIAA0174                                  | IPI00024660,IPI00386516,IPI00420088,IPI00643007 | 39,734.20 | 138 | 147 | TNQIGTVNDR                       | R | L | 1,117.56 |
| 2699 | COMMD4 Isoform 1 of COMM domain-containing protein 4                                    | IPI00413500,IPI00852907                         | 21,746.70 | 138 | 158 | VDYTLSSLLQSVVEEPMVHLR            | R | L | 2,419.22 |
| 2700 | RAB1B Ras-related protein Rab-1B                                                        | IPI00008964,IPI00896425                         | 22,154.00 | 138 | 153 | EFADSLGIPFLETSK                  | K | N | 1,724.87 |
| 2701 | ID4 DNA-binding protein inhibitor ID-4                                                  | IPI00026864                                     | 16,604.40 | 138 | 153 | TPLTALNTDPAGAVNK                 | R | Q | 1,582.84 |
| 2702 | CNOT2 Isoform 1 of CCR4-NOT transcription complex subunit 2                             | IPI00005011,IPI00410623,IPI00789121             | 59,721.30 | 138 | 154 | NMMNHSQVGGGIGIPSR                | R | T | 1,857.87 |
| 2703 | SLC25A3 Isoform A of Phosphate carrier protein, mitochondrial                           | IPI00022202,IPI00215777,IPI00790115             | 40,077.90 | 138 | 145 | FGFYEVFK                         | K | V | 1,036.51 |
| 2704 | TPI1 Isoform 1 of Triosephosphate isomerase                                             | IPI00465028                                     | 30,772.80 | 138 | 150 | HVFGESDELIGQK                    | R | V | 1,458.72 |
| 2705 | PABPC1 Isoform 1 of Polyadenylate-binding protein 1                                     | IPI00008524                                     | 70,653.30 | 139 | 153 | GYGFVHFETQEAAER                  | K | A | 1,740.80 |
| 2706 | HNRNPD Isoform 1 of Heterogeneous nuclear ribonucleoprotein D0                          | IPI00028888,IPI00220684                         | 38,416.50 | 139 | 146 | GFGFVLFK                         | R | E | 914.5135 |
| 2707 | YWHAQ 14-3-3 protein theta                                                              | IPI00018146                                     | 27,747.40 | 139 | 158 | KQTIDNSQGAYQEAFDISKK             | R | E | 2,271.13 |
| 2708 | RPS10 40S ribosomal protein S10                                                         | IPI00008438                                     | 18,880.30 | 139 | 153 | KAEAGAGSATEFQFR                  | K | G | 1,569.77 |
| 2709 | RPA2 Isoform 1 of Replication protein A 32 kDa subunit                                  | IPI00013939,IPI00646500,IPI00647667             | 29,228.70 | 139 | 145 | KSLVAFK                          | K | I | 792.4978 |
| 2710 | PCNA Proliferating cell nuclear antigen                                                 | IPI00021700                                     | 28,751.30 | 139 | 146 | MPSGEFAR                         | K | I | 910.4088 |
| 2711 | CLIC1 Chloride intracellular channel protein 1                                          | IPI00010896                                     | 26,905.30 | 139 | 165 | VLDNYLTSPLPEEVDETSAED<br>EGVSQR  | K | K | 2,992.39 |
| 2712 | TBCB Tubulin folding cofactor B                                                         | IPI00293126                                     | 27,307.50 | 139 | 148 | AQQAEEAAQR                       | R | L | 1,101.53 |
| 2713 | PFKP 6-phosphofructokinase type C                                                       | IPI00009790                                     | 85,579.40 | 139 | 150 | KEWSGLLEELAR                     | R | N | 1,430.76 |
| 2714 | AK1 Adenylate kinase isoenzyme 1                                                        | IPI00018342,IPI00640817                         | 21,617.10 | 139 | 148 | VDDNEETIKK                       | R | R | 1,190.59 |
| 2715 | PDLIM1 PDZ and LIM domain protein 1                                                     | IPI00010414                                     | 36,053.30 | 139 | 166 | VITNQYNNPAGLYSSENISNF<br>NNALESK | R | T | 3,101.48 |
| 2716 | RPL23A;hCG_16001 60S ribosomal protein L23a                                             | IPI00021266                                     | 17,678.20 | 140 | 156 | LAPDYDALDVANKIGII                | R | - | 1,800.97 |
| 2717 | YWHAZ 14-3-3 protein zeta/delta                                                         | IPI00021263                                     | 27,727.90 | 140 | 158 | GIVDQSQQAYQEAFEISKK              | K | E | 2,169.08 |
| 2718 | RPS10 40S ribosomal protein S10                                                         | IPI00008438                                     | 18,880.30 | 140 | 153 | AEAGAGSATEFQFR                   | K | G | 1,441.67 |
| 2719 | RPS10 40S ribosomal protein S10                                                         | IPI00008438                                     | 18,880.30 | 140 | 153 | AEAGAGSATEFQFR                   | K | G | 1,441.67 |
| 2720 | PSMD14 26S proteasome non-ATPase regulatory subunit 14                                  | IPI00024821                                     | 34,558.60 | 140 | 152 | AVAVVVDPISVK                     | R | G | 1,324.78 |
| 2721 | RPL23A;hCG_16001 60S ribosomal protein L23a                                             | IPI00021266                                     | 17,678.20 | 140 | 152 | LAPDYDALDVANK                    | R | I | 1,404.70 |
| 2722 | RPL23A;hCG_16001 60S ribosomal protein L23a                                             | IPI00021266                                     | 17,678.20 | 140 | 152 | LAPDYDALDVANK                    | R | I | 1,404.70 |
| 2723 | RPL23A;hCG_16001 60S ribosomal protein L23a                                             | IPI00021266                                     | 17,678.20 | 140 | 152 | LAPDYDALDVANK                    | R | I | 1,404.70 |
| 2724 | YWHAZ 14-3-3 protein zeta/delta                                                         | IPI00021263                                     | 27,727.90 | 140 | 157 | GIVDQSQQAYQEAFEISK               | K | K | 2,040.99 |
| 2725 | HNRNPK Isoform 1 of Heterogeneous nuclear ribonucleoprotein K                           | IPI00216049,IPI00216746,IPI00807545,IPI00910458 | 50,960.50 | 140 | 148 | GSDFDCELR                        | K | L | 1,098.45 |
| 2726 | HSPA5 HSPA5 protein                                                                     | IPI00003362                                     | 72,405.60 | 140 | 153 | TFAPEEISAMVLTK                   | K | M | 1,552.79 |
| 2727 | UFD1L Isoform Short of Ubiquitin fusion degradation protein 1 homolog                   | IPI00218292,IPI00655754,IPI00873326             | 34,483.20 | 140 | 147 | AVLENALR                         | K | N | 885.5152 |
| 2728 | BUB3 Mitotic checkpoint protein BUB3                                                    | IPI00013468,IPI00514701,IPI00644108             | 37,136.70 | 140 | 157 | VYTLVSGDRLIVGTAGR                | K | R | 1,864.03 |
| 2729 | PRDX2 Peroxiredoxin-2                                                                   | IPI00027350                                     | 21,874.40 | 140 | 150 | QITVNDLPVGR                      | R | S | 1,211.67 |

|      |                                                                               |                                     |            |     |     |                                    |   |          |
|------|-------------------------------------------------------------------------------|-------------------------------------|------------|-----|-----|------------------------------------|---|----------|
| 2730 | EEF1B2 Elongation factor 1-beta                                               | IPI00178440                         | 24,746.20  | 140 | 163 | SSILLDVKPWDDETDMAKLEE K<br>CVR     | S | 2,849.37 |
| 2731 | VBP1 Von Hippel-Lindau binding protein 1                                      | IPI00334159                         | 26,518.00  | 141 | 150 | FLLADNLYCK R                       | A | 1,256.63 |
| 2732 | MUL1 Mitochondrial ubiquitin ligase activator of NFKB 1                       | IPI00470595                         | 39,781.50  | 141 | 158 | VLKPLDSVDLGLLETVYEK R              | F | 2,018.11 |
| 2733 | TNPO1 transportin 1 isoform 1                                                 | IPI00024364,IPI00843876             | 102,340.80 | 141 | 162 | LCSLLDSEDYNTCEGAFGAL K<br>QK       | I | 2,491.11 |
| 2734 | TOP1 DNA topoisomerase 1                                                      | IPI00413611                         | 90,711.70  | 141 | 150 | DEDDADYKPK R                       | K | 1,195.51 |
| 2735 | RAB1A Isoform 1 of Ras-related protein Rab-1A                                 | IPI00005719,IPI00873902             | 22,660.40  | 141 | 156 | EFADSLGIPFLETSK R                  | N | 1,724.87 |
| 2736 | NAT13 Isoform 1 of N-acetyltransferase 13                                     | IPI00018627                         | 19,380.90  | 141 | 152 | RIEPADAHVLQK R                     | N | 1,376.76 |
| 2737 | PRDX1 Peroxiredoxin-1                                                         | IPI00000874                         | 22,092.90  | 141 | 151 | QITVNDLPVGR R                      | S | 1,211.67 |
| 2738 | FAM96B UPF0195 protein FAM96B                                                 | IPI00007024                         | 17,644.70  | 142 | 162 | VAAALENTHLLEVVNQCLSAR R            | - | 2,308.21 |
| 2739 | PGK1 Phosphoglycerate kinase 1                                                | IPI00169383                         | 44,597.30  | 142 | 151 | AEPKIEAFR K                        | A | 1,131.62 |
| 2740 | YWHAE 14-3-3 protein epsilon                                                  | IPI00000816                         | 29,157.00  | 142 | 153 | KEAAENSLVAYK R                     | A | 1,322.70 |
| 2741 | FDPS Farnesyl pyrophosphate synthetase                                        | IPI00914566                         | 48,258.70  | 142 | 150 | KQDADSLQR R                        | A | 1,060.54 |
| 2742 | CDK5 Cell division protein kinase 5                                           | IPI00023530                         | 33,287.80  | 142 | 149 | LADFGAR K                          | A | 862.4782 |
| 2743 | CDK5 Cell division protein kinase 5                                           | IPI00023530                         | 33,287.80  | 142 | 149 | LADFGAR K                          | A | 862.4782 |
| 2744 | AP3M1 AP-3 complex subunit mu-1                                               | IPI00032459                         | 46,922.00  | 142 | 169 | SVVNSITGSSNVGDTLPTGQL R<br>SNIPWRR | A | 2,955.53 |
| 2745 | PKM2 Isoform M1 of Pyruvate kinase isozymes M1/M2                             | IPI00220644,IPI00479186             | 58,044.60  | 142 | 151 | ITLDNAYMEK K                       | C | 1,197.58 |
| 2746 | CBX3;LOC653972 Chromobox protein homolog 3                                    | IPI00297579                         | 20,794.00  | 142 | 154 | WKDSDEADLVAK K                     | E | 1,489.75 |
| 2747 | C8orf55 UPF0670 protein C8orf55                                               | IPI00171421                         | 23,847.60  | 142 | 150 | DGFVCALLR R                        | F | 1,050.54 |
| 2748 | GPX8 Probable glutathione peroxidase 8                                        | IPI00291695,IPI00910821             | 23,891.70  | 142 | 152 | ILGSEGEPAFR K                      | F | 1,175.61 |
| 2749 | DCXR L-xylulose reductase                                                     | IPI00448095,IPI00797249             | 25,894.20  | 142 | 153 | AVTNHNSVYCSTK R                    | G | 1,366.64 |
| 2750 | SPC25 Kinetochore protein Spc25                                               | IPI00010219                         | 26,136.20  | 142 | 147 | LGLEIR R                           | K | 700.4353 |
| 2751 | ATP2A2 Isoform SERCA2A of Sarcoplasmic/endoplasmic reticulum calcium ATPase 2 | IPI00177817,IPI00219078,IPI00747443 | 109,674.90 | 142 | 164 | AKDIVPGDIVEIAVGDKVPADI K<br>R      | L | 2,390.33 |
| 2752 | DARS Aspartyl-tRNA synthetase, cytoplasmic                                    | IPI00216951                         | 57,118.70  | 142 | 151 | IYVISLAEPR K                       | L | 1,160.67 |
| 2753 | NAT13 Isoform 1 of N-acetyltransferase 13                                     | IPI00018627                         | 19,380.90  | 142 | 152 | IEPADAHVLQK R                      | N | 1,220.66 |
| 2754 | NAT13 Isoform 1 of N-acetyltransferase 13                                     | IPI00018627                         | 19,380.90  | 142 | 152 | IEPADAHVLQK R                      | N | 1,220.66 |
| 2755 | HPRT1 Hypoxanthine-guanine phosphoribosyltransferase                          | IPI00218493,IPI00873466             | 24,562.20  | 142 | 151 | TMQTLLSLVR K                       | Q | 1,161.67 |
| 2756 | TOMM34 Mitochondrial import receptor subunit TOM34                            | IPI00009946                         | 34,542.30  | 142 | 156 | LKLPSIPLVPVSAQK R                  | R | 1,590.00 |
| 2757 | THOC4 THO complex subunit 4                                                   | IPI00328840                         | 27,540.50  | 142 | 148 | AAVHYDR K                          | S | 831.4107 |
| 2758 | TXNDC9 Thioredoxin domain-containing protein 9                                | IPI00022386,IPI00917664             | 26,517.00  | 142 | 153 | VIPTLALLKDGK K                     | T | 1,267.80 |
| 2759 | PSME1 Proteasome activator complex subunit 1                                  | IPI00479722,IPI00748256             | 28,705.80  | 142 | 155 | IEDGNNGVAVQEK R                    | V | 1,519.74 |
| 2760 | C16orf80 UPF0468 protein C16orf80                                             | IPI00001655                         | 22,757.60  | 142 | 153 | RAYGTNYIETLR R                     | V | 1,456.75 |
| 2761 | FBL rRNA 2'-O-methyltransferase fibrillarin                                   | IPI00025039                         | 33,766.10  | 142 | 162 | SKLAAAILGGVDQIHIKPGAK R            | V | 2,087.23 |
| 2762 | APEX1 DNA-(apurinic or apyrimidinic site) lyase                               | IPI00215911                         | 35,537.70  | 142 | 156 | VSYGIGDEEHDQEGR K                  | V | 1,690.73 |
| 2763 | RCC2 Protein RCC2                                                             | IPI00465044                         | 56,066.80  | 142 | 149 | YGCLAGVR R                         | V | 895.4455 |
| 2764 | YWHAE 14-3-3 protein epsilon                                                  | IPI00000816                         | 29,157.00  | 143 | 153 | EAAENSLVAYK K                      | A | 1,194.60 |
| 2765 | YWHAE 14-3-3 protein epsilon                                                  | IPI00000816                         | 29,157.00  | 143 | 153 | EAAENSLVAYK K                      | A | 1,194.60 |
| 2766 | CDK2 Cell division protein kinase 2                                           | IPI00031681                         | 33,912.70  | 143 | 150 | LADFGAR K                          | A | 862.4782 |
| 2767 | CDK2 Cell division protein kinase 2                                           | IPI00031681                         | 33,912.70  | 143 | 150 | LADFGAR K                          | A | 862.4782 |
| 2768 | MLF2 Myeloid leukemia factor 2                                                | IPI00023095                         | 28,129.90  | 143 | 158 | DSDSGLEQMSIGHHIR R                 | D | 1,781.82 |
| 2769 | NARS Asparaginyl-tRNA synthetase, cytoplasmic                                 | IPI00306960                         | 62,926.20  | 143 | 150 | NLMFLVLR K                         | D | 1,021.59 |
| 2770 | GRB2 Isoform 1 of Growth factor receptor-bound protein 2                      | IPI00021327                         | 25,188.80  | 143 | 149 | NQQIFLR R                          | D | 918.5156 |
| 2771 | ARF1 ADP-ribosylation factor 1                                                | IPI00215914,IPI00215917             | 20,679.60  | 143 | 149 | LGLHSLR K                          | H | 795.4836 |
| 2772 | NONO Non-POU domain-containing octamer-binding protein                        | IPI00304596                         | 54,213.60  | 143 | 153 | FACHSASLTVR R                      | N | 1,248.62 |

|      |                                                                          |                                                 |           |     |     |                                 |   |   |          |
|------|--------------------------------------------------------------------------|-------------------------------------------------|-----------|-----|-----|---------------------------------|---|---|----------|
| 2773 | NONO Non-POU domain-containing octamer-binding protein                   | IPI00304596                                     | 54,213.60 | 143 | 153 | FACHSASLTVR                     | R | N | 1,248.62 |
| 2774 | ARF4 ADP-ribosylation factor 4                                           | IPI00215918                                     | 20,493.60 | 143 | 149 | LGLQLSR                         | K | N | 786.4833 |
| 2775 | PRDX6 Peroxiredoxin-6                                                    | IPI00220301                                     | 25,018.10 | 143 | 155 | LKLSILYPATTGR                   | K | N | 1,432.85 |
| 2776 | RPS6 40S ribosomal protein S6                                            | IPI00021840                                     | 28,663.70 | 143 | 154 | KLFNLSKEDDVR                    | R | Q | 1,463.79 |
| 2777 | PIN1 Peptidyl-prolyl cis-trans isomerase NIMA-interacting 1              | IPI00013723                                     | 18,225.70 | 143 | 161 | TGEMSGPVFTDSGIHILR              | R | T | 2,046.03 |
| 2778 | NOP56 Nucleolar protein 5A                                               | IPI00411937                                     | 66,034.00 | 144 | 154 | AQLGLGHSYSR                     | K | A | 1,188.61 |
| 2779 | PSMA7 Isoform 1 of Proteasome subunit alpha type-7                       | IPI00024175                                     | 27,869.10 | 144 | 157 | LYQTDPSGTYHAWK                  | R | A | 1,666.79 |
| 2780 | NSF Vesicle-fusing ATPase                                                | IPI00006451                                     | 82,545.40 | 144 | 150 | LFGLLVK                         | K | D | 789.5234 |
| 2781 | MEA1 male-enhanced antigen                                               | IPI00157176                                     | 19,886.00 | 144 | 160 | TMAGVSLPAPGVPAWAR               | R | E | 1,696.88 |
| 2782 | CYB5R3 Isoform 1 of NADH-cytochrome b5 reductase 3                       | IPI00328415,IPI00446235,IPI00871319             | 34,218.30 | 144 | 154 | GPSGLLVYQ GK                    | R | G | 1,118.62 |
| 2783 | DNAJA1 DnaJ homolog subfamily A member 1                                 | IPI00012535                                     | 44,850.60 | 144 | 154 | KGAVECCPNCR                     | K | G | 1,350.57 |
| 2784 | RARS Isoform Complexed of Arginyl-tRNA synthetase, cytoplasmic           | IPI00004860                                     | 75,364.00 | 144 | 167 | HLPDNECIEKVEIAGPGFINVH LR       | K | K | 2,757.41 |
| 2785 | RPS6 40S ribosomal protein S6                                            | IPI00021840                                     | 28,663.70 | 144 | 154 | LFNLSKEDDVR                     | K | Q | 1,335.69 |
| 2786 | YOD1 Isoform 1 of Ubiquitin thioesterase OTU1                            | IPI00183503,IPI00644473                         | 38,304.70 | 144 | 151 | ETLPVLTR                        | R | T | 928.5463 |
| 2787 | CCT4 T-complex protein 1 subunit delta                                   | IPI00302927,IPI00873222                         | 57,907.90 | 144 | 174 | GIEILTDMSRPVELSDRETLN SATTSLNSK | K | V | 3,390.74 |
| 2788 | FBL rRNA 2'-O-methyltransferase fibrillar                                | IPI00025039                                     | 33,766.10 | 144 | 162 | LAAAILGGVDQIHIKPGAK             | K | V | 1,872.11 |
| 2789 | ILKAP Integrin-linked kinase-associated serine/threonine phosphatase 2C  | IPI00006164                                     | 42,889.20 | 145 | 158 | VSYFAVFDGHGGIR                  | R | A | 1,524.76 |
| 2790 | XRCC5 ATP-dependent DNA helicase 2 subunit 2                             | IPI00220834,IPI00871391                         | 82,689.10 | 145 | 156 | SQLDIIHSLKK                     | K | C | 1,394.84 |
| 2791 | MARCKSL1 MARCKS-related protein                                          | IPI00641181                                     | 19,510.60 | 145 | 157 | AAATPESQEPQAK                   | K | G | 1,327.65 |
| 2792 | GSTK1 Glutathione S-transferase kappa 1                                  | IPI00219673,IPI00440703,IPI00917331,IPI00917714 | 25,480.10 | 145 | 158 | AGMSAEQAQGLLEK                  | K | I | 1,432.71 |
| 2793 | XRCC5 ATP-dependent DNA helicase 2 subunit 2                             | IPI00220834,IPI00871391                         | 82,689.10 | 145 | 155 | SQLDIIHSLK                      | K | K | 1,266.74 |
| 2794 | CACYBP Isoform 1 of Calcyclin-binding protein                            | IPI00395627                                     | 26,192.30 | 145 | 155 | VKTDTVLILCR                     | K | K | 1,317.76 |
| 2795 | CDK6 Cell division protein kinase 6                                      | IPI00023529                                     | 36,920.80 | 145 | 160 | DLKPQNILVTSSGQIK                | R | L | 1,740.99 |
| 2796 | EIF2A Isoform 1 of Eukaryotic translation initiation factor 2A           | IPI00902564                                     | 64,973.20 | 145 | 164 | NVNNEVHFFENNFNTIANK             | R | L | 2,379.11 |
| 2797 | PCBP1 Poly(rC)-binding protein 1                                         | IPI00016610                                     | 37,480.20 | 145 | 160 | AITIAGVPQSVTECVK                | R | Q | 1,672.89 |
| 2798 | RBMX Heterogeneous nuclear ribonucleoprotein G                           | IPI00304692                                     | 42,315.70 | 145 | 150 | GPLPVK                          | R | R | 610.3924 |
| 2799 | LMNA Isoform A of Lamin-A/C                                              | IPI00021405                                     | 74,122.60 | 145 | 156 | EAALSTALSEKR                    | K | T | 1,275.69 |
| 2800 | RBM3 Putative RNA-binding protein 3                                      | IPI00024320                                     | 17,152.60 | 146 | 157 | YSGGNRYRDNYDN                   | R | - | 1,437.57 |
| 2801 | C14orf166 UPF0568 protein C14orf166                                      | IPI00006980                                     | 28,051.30 | 146 | 154 | HDDYLVMLK                       | R | A | 1,133.57 |
| 2802 | TFRC Transferrin receptor protein 1                                      | IPI00022462                                     | 84,855.60 | 146 | 155 | LLNENSYVPR                      | K | E | 1,204.63 |
| 2803 | RPS5 40S ribosomal protein S5                                            | IPI00008433                                     | 22,859.00 | 146 | 159 | RVNQAIWLLCTGAR                  | R | E | 1,657.90 |
| 2804 | COPZ1 Coatomer subunit zeta-1                                            | IPI00032851                                     | 20,180.90 | 146 | 168 | VALRGEDVPLTEQTVSQVLQS AK        | R | E | 2,468.34 |
| 2805 | PARK7 Protein DJ-1                                                       | IPI00298547                                     | 19,873.10 | 146 | 156 | VEKDGLILTSR                     | R | G | 1,230.71 |
| 2806 | DHX15 Putative pre-mRNA-splicing factor ATP-dependent RNA helicase DHX15 | IPI00396435                                     | 90,917.20 | 146 | 152 | FTDILVR                         | R | H | 863.4986 |
| 2807 | HNRNPR heterogeneous nuclear ribonucleoprotein R isoform 1               | IPI00644055                                     | 71,197.20 | 146 | 171 | KYGGPPDPSVYSGVQPGIGT EVFVGK     | R | I | 2,635.34 |
| 2808 | RPS7 40S ribosomal protein S7                                            | IPI00013415                                     | 22,109.50 | 146 | 152 | VKLDGSR                         | R | L | 774.4469 |
| 2809 | RPS7 40S ribosomal protein S7                                            | IPI00013415                                     | 22,109.50 | 146 | 152 | VKLDGSR                         | R | L | 774.4469 |
| 2810 | RPL13 60S ribosomal protein L13                                          | IPI00465361                                     | 24,244.20 | 146 | 158 | LATQLTGPVMPVR                   | K | N | 1,398.78 |
| 2811 | SFRS6 Isoform SRP55-1 of Splicing factor, arginine/serine-rich 6         | IPI00012345,IPI00215879,IPI00556297             | 39,570.40 | 146 | 154 | TNEGVIEFR                       | R | S | 1,064.54 |
| 2812 | SFRS6 Isoform SRP55-1 of Splicing factor, arginine/serine-rich 6         | IPI00012345,IPI00215879,IPI00556297             | 39,570.40 | 146 | 154 | TNEGVIEFR                       | R | S | 1,064.54 |
| 2813 | PPIB Peptidyl-prolyl cis-trans isomerase B                               | IPI00646304                                     | 23,725.20 | 146 | 158 | DTNGSQFFITTVK                   | K | T | 1,457.73 |
| 2814 | GAPDH Glyceraldehyde-3-phosphate dehydrogenase                           | IPI00219018                                     | 36,035.30 | 146 | 162 | IISNASCTTNCLAPLAK               | K | V | 1,833.92 |



|      |                                                                                   |                                                             |           |     |     |                                 |   |   |          |
|------|-----------------------------------------------------------------------------------|-------------------------------------------------------------|-----------|-----|-----|---------------------------------|---|---|----------|
| 2815 | GAPDH Glyceraldehyde-3-phosphate dehydrogenase                                    | IPI00219018                                                 | 36,035.30 | 146 | 162 | IISNASCTTNCLAPLAK               | K | V | 1,833.92 |
| 2816 | GAPDH Glyceraldehyde-3-phosphate dehydrogenase                                    | IPI00219018                                                 | 36,035.30 | 146 | 162 | IISNASCTTNCLAPLAK               | K | V | 1,833.92 |
| 2817 | GAPDH Glyceraldehyde-3-phosphate dehydrogenase                                    | IPI00219018                                                 | 36,035.30 | 146 | 162 | IISNASCTTNCLAPLAK               | K | V | 1,833.92 |
| 2818 | UCHL3 Ubiquitin carboxyl-terminal hydrolase isozyme L3                            | IPI00011250                                                 | 26,164.80 | 146 | 165 | VTHETSAHEGQTEAPSIDEK            | R | V | 2,165.99 |
| 2819 | HNRNPA1 Isoform A1-B of Heterogeneous nuclear ribonucleoprotein A1                | IPI00215965,IPI00465365                                     | 38,828.10 | 146 | 166 | RGFAFVTFDDHDSVDKIVIQK           | K | Y | 2,437.25 |
| 2820 | MRPL43 Isoform 4 of 39S ribosomal protein L43, mitochondrial                      | IPI00428288                                                 | 17,834.70 | 147 | 159 | EVQDPAPAQVQAAQ                  | R | - | 1,380.68 |
| 2821 | RPL12 Isoform 1 of 60S ribosomal protein L12                                      | IPI00024933                                                 | 17,801.10 | 147 | 165 | HPHDIIDDINSGAVECPAS             | R | - | 2,046.92 |
| 2822 | PSMB1 Proteasome subunit beta type-1                                              | IPI00025019                                                 | 26,472.50 | 147 | 160 | GAVYSFDPVGSYQR                  | K | D | 1,545.73 |
| 2823 | HNRNPR heterogeneous nuclear ribonucleoprotein R isoform 1                        | IPI00644055                                                 | 71,197.20 | 147 | 174 | YGGPPPSVYSGVQPGIGTE<br>VFVGKIPR | K | D | 2,873.48 |
| 2824 | RAB7A Ras-related protein Rab-7a                                                  | IPI00016342                                                 | 23,472.00 | 147 | 157 | NNIPYFETSAK                     | K | E | 1,283.63 |
| 2825 | RPS5 40S ribosomal protein S5                                                     | IPI00008433                                                 | 22,859.00 | 147 | 159 | VNQAIWLLCTGAR                   | R | E | 1,501.79 |
| 2826 | HNRNPA1 Isoform A1-B of Heterogeneous nuclear ribonucleoprotein A1                | IPI00215965,IPI00465365                                     | 38,828.10 | 147 | 161 | GFAFVTFDDHDSVDK                 | R | I | 1,699.76 |
| 2827 | PHGDH D-3-phosphoglycerate dehydrogenase                                          | IPI00011200                                                 | 56,632.60 | 147 | 155 | TLGILGLGR                       | K | I | 899.5675 |
| 2828 | RP6-213H19.1 Serine/threonine-protein kinase MST4                                 | IPI00292827,IPI00760722,IPI00844141,IPI00872588,IPI00911046 | 46,512.40 | 147 | 159 | AANVLLSEQGDVK                   | K | L | 1,343.72 |
| 2829 | HN1L Isoform 1 of Hematological and neurological expressed 1-like protein         | IPI00027397,IPI00909195                                     | 20,045.60 | 147 | 166 | KAGPAKEQEPMPVDSHEPR             | R | L | 2,204.08 |
| 2830 | PI4K2A Phosphatidylinositol 4-kinase type 2-alpha                                 | IPI00020124                                                 | 54,005.00 | 147 | 154 | IIAVFKPK                        | R | N | 915.6027 |
| 2831 | ST13 Hsc70-interacting protein                                                    | IPI00032826                                                 | 41,314.40 | 147 | 153 | LAILYAK                         | R | R | 791.5026 |
| 2832 | PITPNB Isoform 1 of Phosphatidylinositol transfer protein beta isoform            | IPI00334907                                                 | 31,522.30 | 147 | 167 | SQVEPADYKADEDPALFQSV<br>K       | R | T | 2,337.12 |
| 2833 | PHB2 Prohibitin-2                                                                 | IPI00027252                                                 | 33,279.60 | 148 | 157 | FNASQLITQR                      | K | A | 1,177.63 |
| 2834 | SEC22B Vesicle-trafficking protein SEC22b                                         | IPI00006865                                                 | 24,723.40 | 148 | 159 | IMVANIEEVLQR                    | R | G | 1,414.77 |
| 2835 | RPL14 Ribosomal protein L14 variant                                               | IPI00555744                                                 | 23,769.70 | 148 | 170 | GTAAAAAAAAAAAAAAAAAKVPA<br>KK   | K | I | 1,894.09 |
| 2836 | RPL14 Ribosomal protein L14 variant                                               | IPI00555744                                                 | 23,769.70 | 148 | 169 | GTAAAAAAAAAAAAAAAAAKVPA<br>K    | K | K | 1,765.99 |
| 2837 | UBE2M NEDD8-conjugating enzyme Ubc12                                              | IPI00022597                                                 | 20,882.90 | 148 | 158 | EAAEVLQNNRR                     | K | L | 1,299.68 |
| 2838 | PAFAH1B1 Isoform 1 of Platelet-activating factor acetylhydrolase IB subunit alpha | IPI00218728                                                 | 46,619.40 | 148 | 163 | GHTDSVQDISFDHSGK                | K | L | 1,729.78 |
| 2839 | EIF2B1 Translation initiation factor eIF-2B subunit alpha                         | IPI00221300                                                 | 33,695.20 | 148 | 163 | FSVYVTEQPDLGK                   | R | M | 1,784.91 |
| 2840 | UBE2M NEDD8-conjugating enzyme Ubc12                                              | IPI00022597                                                 | 20,882.90 | 148 | 157 | EAAEVLQNNR                      | K | R | 1,143.58 |
| 2841 | HAX1 cDNA FLJ53021, highly similar to HS1-associated protein X-1                  | IPI00010440,IPI00641973                                     | 32,443.00 | 148 | 158 | IFGGVLESDAR                     | R | S | 1,163.61 |
| 2842 | RPL14 Ribosomal protein L14 variant                                               | IPI00555744                                                 | 23,769.70 | 148 | 165 | GTAAAAAAAAAAAAAAAAAK            | K | V | 1,370.74 |
| 2843 | C15orf15 Probable ribosome biogenesis protein RLP24                               | IPI00008437                                                 | 19,603.60 | 149 | 163 | MVQQLQEDVDMEDAP                 | K | - | 1,779.74 |
| 2844 | CUGBP1 Isoform 1 of CUG-BP- and ETR-3-like factor 1                               | IPI00034015,IPI00218388,IPI00218389,IPI00853009             | 52,046.00 | 149 | 158 | GCAFVTFTR                       | R | A | 1,159.56 |
| 2845 | HSP90AB1 Heat shock protein HSP 90-beta                                           | IPI00414676                                                 | 83,249.30 | 149 | 168 | HNDDEQYAWESSAGGSFTV<br>R        | K | A | 2,255.96 |
| 2846 | TOMM70A Mitochondrial import receptor subunit TOM70                               | IPI00015602                                                 | 67,439.20 | 149 | 159 | NVDLSTFYQNR                     | K | A | 1,356.65 |
| 2847 | DGCR6L Protein DGCR6L                                                             | IPI00260322                                                 | 24,914.40 | 149 | 158 | VADQQSTLEK                      | K | A | 1,118.57 |
| 2848 | VPS28 Vacuolar protein sorting-associated protein 28 homolog                      | IPI00007155,IPI00328913,IPI00795056,IPI00796001             | 25,408.00 | 149 | 158 | AMDEIQPDLR                      | R | E | 1,203.57 |
| 2849 | PARK7 Protein DJ-1                                                                | IPI00298547                                                 | 19,873.10 | 149 | 156 | DGLILTSR                        | K | G | 874.4994 |
| 2850 | SAR1A GTP-binding protein SAR1a                                                   | IPI00015954                                                 | 22,349.70 | 149 | 160 | EIFGLYQTTGK                     | R | G | 1,313.67 |
| 2851 | HNRNPK Isoform 1 of Heterogeneous nuclear ribonucleoprotein K                     | IPI00216049,IPI00216746,IPI00807545,IPI00910458             | 50,960.50 | 149 | 163 | LLIHQSLAGGIIVK                  | R | G | 1,518.94 |

|      |                                                                                              |                                                 |            |     |     |                            |   |   |          |
|------|----------------------------------------------------------------------------------------------|-------------------------------------------------|------------|-----|-----|----------------------------|---|---|----------|
| 2852 | HNRNPK Isoform 1 of Heterogeneous nuclear ribonucleoprotein K                                | IPI00216049,IPI00216746,IPI00807545,IPI00910458 | 50,960.50  | 149 | 163 | LLIHQSLAGGIIGVK            | R | G | 1,518.94 |
| 2853 | ABCE1 ATP-binding cassette sub-family E member 1                                             | IPI00303207                                     | 67,298.40  | 149 | 158 | GSELQNYFTK                 | R | I | 1,186.57 |
| 2854 | ENOPH1 Isoform 1 of Enolase-phosphatase E1                                                   | IPI00038378                                     | 28,914.40  | 149 | 161 | VYIYSSGSVEAQK              | K | L | 1,430.72 |
| 2855 | CUL2 Cullin-2                                                                                | IPI00014311,IPI00642151                         | 86,967.40  | 149 | 161 | KLMVEPLQAILIR              | R | M | 1,539.93 |
| 2856 | PDCL3 Phosducin-like protein 3                                                               | IPI00031629                                     | 27,597.50  | 149 | 161 | AISTTCIPNYPDR              | K | N | 1,507.72 |
| 2857 | HNRNPA3 Isoform 1 of Heterogeneous nuclear ribonucleoprotein A3                              | IPI00419373                                     | 39,577.10  | 149 | 161 | YGKIETIEVMEDR              | K | Q | 1,598.77 |
| 2858 | HNRNPA3 Isoform 1 of Heterogeneous nuclear ribonucleoprotein A3                              | IPI00419373                                     | 39,577.10  | 149 | 161 | YGKIETIEVMEDR              | K | Q | 1,582.78 |
| 2859 | SEPT9 septin 9 isoform a                                                                     | IPI00784614,IPI00784808,IPI00784936             | 65,384.30  | 149 | 163 | RTEITIVKPQESAHR            | R | R | 1,764.97 |
| 2860 | LMNB2 Lamin-B2                                                                               | IPI00009771,IPI00879819                         | 69,931.40  | 149 | 158 | VKDLESLFHR                 | R | S | 1,243.68 |
| 2861 | PSMA5 Proteasome subunit alpha type-5                                                        | IPI00291922                                     | 26,393.30  | 150 | 168 | GPQLFHMDPSGTFVQCDAK        | K | A | 2,178.97 |
| 2862 | CDC2 Putative uncharacterized protein DKFZp686L20222                                         | IPI00026689                                     | 34,762.10  | 150 | 157 | LADFGLAR                   | K | A | 862.4782 |
| 2863 | CDC2 Putative uncharacterized protein DKFZp686L20222                                         | IPI00026689                                     | 34,762.10  | 150 | 157 | LADFGLAR                   | K | A | 862.4782 |
| 2864 | JUP Junction plakoglobin                                                                     | IPI00554711                                     | 81,727.90  | 150 | 161 | LLNDEDPVVVTK               | K | A | 1,341.73 |
| 2865 | UBE2S Ubiquitin-conjugating enzyme E2 S                                                      | IPI00217949                                     | 23,828.40  | 150 | 164 | LLTEIHGGAGGPPSGR           | R | A | 1,421.75 |
| 2866 | UBE2S Ubiquitin-conjugating enzyme E2 S                                                      | IPI00217949                                     | 23,828.40  | 150 | 164 | LLTEIHGGAGGPPSGR           | R | A | 1,421.75 |
| 2867 | PCNA Proliferating cell nuclear antigen                                                      | IPI00021700                                     | 28,751.30  | 150 | 164 | DLSHIGDAVVISCAK            | R | D | 1,584.81 |
| 2868 | UHRF1 ubiquitin-like with PHD and ring finger domains 1 isoform 2                            | IPI00797279,IPI00797945                         | 91,082.30  | 150 | 157 | VNEYVDAR                   | K | D | 965.4686 |
| 2869 | COPZ1 Coatomer subunit zeta-1                                                                | IPI00032851                                     | 20,180.90  | 150 | 168 | GEDVPLTEQTVSQVLQSAK        | R | E | 2,029.05 |
| 2870 | FAM125A Isoform 1 of Multivesicular body subunit 12A                                         | IPI00744702,IPI00788162                         | 28,766.10  | 150 | 160 | AKAPRPVVPKPR               | K | G | 1,216.76 |
| 2871 | AURKB Serine/threonine-protein kinase 12                                                     | IPI00176642,IPI00796914                         | 39,263.50  | 150 | 159 | IYLILEYAPR                 | R | G | 1,250.71 |
| 2872 | MCTS1 Isoform 1 of Malignant T cell amplified sequence 1                                     | IPI00179026                                     | 20,537.90  | 150 | 160 | MSAEDIEKVNK                | K | G | 1,279.62 |
| 2873 | MDH1 Malate dehydrogenase, cytoplasmic                                                       | IPI00291005,IPI00915869                         | 36,408.90  | 150 | 157 | ENFSCLTR                   | K | L | 1,026.47 |
| 2874 | RPLP0 60S acidic ribosomal protein P0                                                        | IPI00008530                                     | 34,256.30  | 150 | 162 | GTIEILSDVQLIK              | R | T | 1,428.83 |
| 2875 | RPL18A 60S ribosomal protein L18a                                                            | IPI00026202                                     | 20,744.60  | 150 | 157 | IKFPLPHR                   | K | V | 1,007.62 |
| 2876 | MCTS1 Isoform 1 of Malignant T cell amplified sequence 1                                     | IPI00179026                                     | 20,537.90  | 150 | 157 | MSAEDIEK                   | K | V | 938.4137 |
| 2877 | MCM5 DNA replication licensing factor MCM5                                                   | IPI00018350,IPI00877948,IPI00878310,IPI00878587 | 82,270.30  | 151 | 162 | IPGIIIAASAVR               | K | A | 1,180.74 |
| 2878 | HNRNPF Heterogeneous nuclear ribonucleoprotein F                                             | IPI00003881                                     | 45,653.80  | 151 | 167 | ITGEAFVQFASQEIAEK          | K | A | 1,867.94 |
| 2879 | HNRNPH1 Heterogeneous nuclear ribonucleoprotein H                                            | IPI00013881,IPI00479191                         | 49,211.80  | 151 | 167 | STGEAFVQFASQEIAEK          | R | A | 1,841.89 |
| 2880 | HNRNPH1 Heterogeneous nuclear ribonucleoprotein H                                            | IPI00013881,IPI00479191                         | 49,211.80  | 151 | 167 | STGEAFVQFASQEIAEK          | R | A | 1,841.89 |
| 2881 | HNRNPH1 Heterogeneous nuclear ribonucleoprotein H                                            | IPI00013881,IPI00479191                         | 49,211.80  | 151 | 167 | STGEAFVQFASQEIAEK          | R | A | 1,841.89 |
| 2882 | HNRNPH1 Heterogeneous nuclear ribonucleoprotein H                                            | IPI00013881,IPI00479191                         | 49,211.80  | 151 | 167 | STGEAFVQFASQEIAEK          | R | A | 1,841.89 |
| 2883 | HNRNPH1 Heterogeneous nuclear ribonucleoprotein H                                            | IPI00013881,IPI00479191                         | 49,211.80  | 151 | 167 | STGEAFVQFASQEIAEK          | R | A | 1,841.89 |
| 2884 | HNRNPH2 Heterogeneous nuclear ribonucleoprotein H2                                           | IPI00026230                                     | 49,246.10  | 151 | 167 | STGEAFVQFASQEIAEK          | R | A | 1,841.89 |
| 2885 | HNRNPH2 Heterogeneous nuclear ribonucleoprotein H2                                           | IPI00026230                                     | 49,246.10  | 151 | 167 | STGEAFVQFASQEIAEK          | R | A | 1,841.89 |
| 2886 | WDR77 Methylosome protein 50                                                                 | IPI00012202                                     | 36,705.20  | 151 | 164 | VWDLAQQVVLSSYR             | K | A | 1,663.88 |
| 2887 | TP11 Isoform 1 of Triosephosphate isomerase                                                  | IPI00465028                                     | 30,772.80  | 151 | 172 | VAHALAEGLVGIACIGEKLDE<br>R | K | E | 2,321.23 |
| 2888 | MTHFD1 C-1-tetrahydrofolate synthase, cytoplasmic                                            | IPI00218342,IPI00794900                         | 101,543.50 | 151 | 166 | GCLELIKETGVPIAGR           | K | H | 1,712.94 |
| 2889 | RFC5 Replication factor C subunit 5                                                          | IPI00031514,IPI00373883                         | 38,480.40  | 151 | 160 | FCLICNYLSK                 | R | I | 1,317.63 |
| 2890 | RPN1 Dolichyl-diphosphooligosaccharide--protein glycosyltransferase 67 kDa subunit precursor | IPI00025874                                     | 72,762.00  | 151 | 165 | FFTVKLPVALDPGAK            | R | I | 1,602.93 |

|      |                                                                                       |                                                 |            |     |     |                         |   |   |          |
|------|---------------------------------------------------------------------------------------|-------------------------------------------------|------------|-----|-----|-------------------------|---|---|----------|
| 2891 | TPI1 Isoform 1 of Triosephosphate isomerase                                           | IPI00465028                                     | 30,772.80  | 151 | 168 | VAHALAEGLVGIACIGEK      | K | L | 1,807.97 |
| 2892 | TPI1 Isoform 1 of Triosephosphate isomerase                                           | IPI00465028                                     | 30,772.80  | 151 | 168 | VAHALAEGLVGIACIGEK      | K | L | 1,807.97 |
| 2893 | EHD4 EH domain-containing protein 4                                                   | IPI00005578                                     | 61,159.60  | 151 | 165 | SISVIDSPGILSGEK         | K | Q | 1,501.81 |
| 2894 | IGF2BP1 Insulin-like growth factor 2 mRNA-binding protein 1                           | IPI00008557                                     | 63,438.30  | 151 | 167 | VSYIPDEQIAQGPENGR       | K | R | 1,872.91 |
| 2895 | RHO C Rho-related GTP-binding protein RhoC                                            | IPI00027434,IPI00647268                         | 21,988.70  | 151 | 162 | ISAFGYLECSAK            | R | T | 1,345.65 |
| 2896 | TPI1 Isoform 1 of Triosephosphate isomerase                                           | IPI00465028                                     | 30,772.80  | 151 | 179 | VAHALAEGLVGIACIGEKLDE   | K | V | 3,049.60 |
| 2897 | PFKP 6-phosphofructokinase type C                                                     | IPI00009790                                     | 85,579.40  | 151 | 161 | REAGITEK<br>NGQIDKEAVQK | R | Y | 1,229.65 |
| 2898 | IGF2BP2 insulin-like growth factor 2 mRNA binding protein 2 isoform a                 | IPI00179713,IPI00180983,IPI00743914             | 66,104.40  | 152 | 168 | ISYIPDEEVSSPSPPPQR      | K | A | 1,900.93 |
| 2899 | RBM4 Isoform 1 of RNA-binding protein 4                                               | IPI00003704                                     | 40,296.20  | 152 | 164 | TAPGMGDQSGCYR           | R | C | 1,415.57 |
| 2900 | RBM4 Isoform 1 of RNA-binding protein 4                                               | IPI00003704                                     | 40,296.20  | 152 | 164 | TAPGMGDQSGCYR           | R | C | 1,415.57 |
| 2901 | RAB2B Ras-related protein Rab-2B                                                      | IPI00102896                                     | 24,197.10  | 152 | 165 | TACNVEEAFINTAK          | K | E | 1,567.74 |
| 2902 | MRLC2 Myosin regulatory light chain MRLC2                                             | IPI00033494,IPI00220573,IPI00604523             | 19,762.30  | 152 | 161 | GNFNIEFTR               | K | I | 1,260.60 |
| 2903 | CSTF3 Cleavage stimulation factor 77 kDa subunit                                      | IPI00015195                                     | 82,906.20  | 152 | 164 | GVEAVGSYAENQR           | K | I | 1,379.65 |
| 2904 | THOC4 THO complex subunit 4                                                           | IPI00328840                                     | 27,540.50  | 152 | 162 | SLGTADVHFER             | R | K | 1,231.61 |
| 2905 | HNRNPA3 Isoform 1 of Heterogeneous nuclear ribonucleoprotein A3                       | IPI00419373                                     | 39,577.10  | 152 | 161 | IETIEVMEDR              | K | Q | 1,234.60 |
| 2906 | HNRNPA3 Isoform 1 of Heterogeneous nuclear ribonucleoprotein A3                       | IPI00419373                                     | 39,577.10  | 152 | 161 | IETIEVMEDR              | K | Q | 1,250.59 |
| 2907 | RPS3A 40S ribosomal protein S3a                                                       | IPI00419880,IPI00472119                         | 29,927.30  | 152 | 162 | KTSYAQHQQVR             | R | Q | 1,345.70 |
| 2908 | RHEB GTP-binding protein Rheb                                                         | IPI00016669                                     | 20,479.90  | 152 | 161 | ENQTAVDVFR              | K | R | 1,178.58 |
| 2909 | AASDHPPT L-aminoadipate-semialdehyde dehydrogenase-phosphopantetheinyl transferase    | IPI00250297                                     | 35,759.10  | 152 | 161 | FTNKEWETIR              | K | S | 1,323.67 |
| 2910 | CHCHD3 Coiled-coil-helix-coiled-coil-helix domain-containing protein 3, mitochondrial | IPI00015833                                     | 26,134.50  | 152 | 157 | SSEFYR                  | R | V | 788.3572 |
| 2911 | RCC1 regulator of chromosome condensation 1 isoform a                                 | IPI00001661,IPI00747309,IPI00787306             | 48,126.30  | 152 | 170 | VVQVSAGDSHTAALTDGGR     | K | V | 1,898.92 |
| 2912 | ALG13 UDP-N-acetylglucosamine transferase subunit ALG13 homolog                       | IPI00020512                                     | 18,207.50  | 153 | 165 | FSAFLDKVVGLQK           | K | - | 1,451.83 |
| 2913 | CFL1 Cofilin-1                                                                        | IPI00012011                                     | 18,485.10  | 153 | 166 | LGGSAVISLEGKPL          | K | - | 1,340.78 |
| 2914 | NAT13 Isoform 1 of N-acetyltransferase 13                                             | IPI00018627                                     | 19,380.90  | 153 | 169 | NLKVPSGQNADVQKTDN       | K | - | 1,827.92 |
| 2915 | RPS7 40S ribosomal protein S7                                                         | IPI00013415                                     | 22,109.50  | 153 | 160 | LKVVHLDK                | R | A | 965.6144 |
| 2916 | RNASEH2A Ribonuclease H2 subunit A                                                    | IPI00290192                                     | 33,377.00  | 153 | 165 | LQQSFPGIEVTVK           | R | A | 1,445.80 |
| 2917 | CNBP Isoform 1 of Cellular nucleic acid-binding protein                               | IPI00430812,IPI00430813,IPI00430814             | 19,444.10  | 153 | 160 | TSEVNCYR                | K | C | 1,028.45 |
| 2918 | PSMD4 Isoform Rpn10A of 26S proteasome non-ATPase regulatory subunit 4                | IPI00022694                                     | 40,719.20  | 153 | 163 | LTAfvNTLNGK             | K | D | 1,177.66 |
| 2919 | ACTN4 Alpha-actinin-4                                                                 | IPI00013808                                     | 104,839.20 | 153 | 166 | FAIQDISVEETSAK          | R | E | 1,537.77 |
| 2920 | HEBP1 Heme-binding protein 1                                                          | IPI00148063                                     | 21,079.40  | 153 | 162 | AALEGATYR               | R | G | 1,052.54 |
| 2921 | ARHGDI A Rho GDP-dissociation inhibitor 1                                             | IPI00003815,IPI00793767,IPI00794402,IPI00796541 | 23,189.50  | 153 | 167 | AAEYEFLLTPVEEAPK        | R | G | 1,751.84 |
| 2922 | NCAPH Condensin complex subunit 2                                                     | IPI00299507                                     | 82,547.10  | 153 | 163 | VAAGTLDASTK             | K | I | 1,033.55 |
| 2923 | GPX8 Probable glutathione peroxidase 8                                                | IPI00291695,IPI00910821                         | 23,891.70  | 153 | 159 | FLVDSSK                 | R | K | 795.4247 |
| 2924 | GNPNAT1 Glucosamine 6-phosphate N-acetyltransferase                                   | IPI00061525                                     | 20,731.30  | 153 | 166 | ITLECLPQNVGFYK          | K | K | 1,681.86 |
| 2925 | RBM14;RBM4 Isoform 1 of RNA-binding protein 14                                        | IPI00013174                                     | 69,474.30  | 153 | 166 | KGPGLAVQSGDKTK          | K | K | 1,385.78 |
| 2926 | RAN GTP-binding nuclear protein Ran                                                   | IPI00643041,IPI00795671                         | 24,405.10  | 153 | 166 | SNYNFEKPFLLWLAR         | K | K | 1,784.91 |
| 2927 | RPS2 40S ribosomal protein S2                                                         | IPI00013485,IPI00888294,IPI00888474             | 31,307.20  | 153 | 159 | GAILAK                  | R | L | 685.4608 |
| 2928 | ANXA2P2 Putative annexin A2-like protein                                              | IPI00334627,IPI00455315                         | 38,642.90  | 153 | 169 | TDLEKDIISDTSGDFRK       | K | L | 1,939.96 |
| 2929 | C1orf35 Isoform 1 of Multiple myeloma tumor-associated protein 2                      | IPI00293746,IPI00642240                         | 29,393.90  | 153 | 166 | VESGGPGTSAASAR          | R | R | 1,246.60 |
| 2930 | NAT13 Isoform 1 of N-acetyltransferase 13                                             | IPI00018627                                     | 19,380.90  | 153 | 166 | NLKVPSGQNADVQK          | K | T | 1,497.80 |
| 2931 | CCT8 T-complex protein 1 subunit theta                                                | IPI00784090                                     | 59,603.00  | 153 | 165 | NLRDIDEVSSLLR           | K | T | 1,529.83 |
| 2932 | RUVBL1 Isoform 1 of RuvB-like 1                                                       | IPI00021187                                     | 50,211.40  | 153 | 162 | TISHVIIGLK              | K | T | 1,080.68 |
| 2933 | RUVBL1 Isoform 1 of RuvB-like 1                                                       | IPI00021187                                     | 50,211.40  | 153 | 162 | TISHVIIGLK              | K | T | 1,080.68 |



|      |                                                                  |                                                             |            |     |     |                         |   |   |          |
|------|------------------------------------------------------------------|-------------------------------------------------------------|------------|-----|-----|-------------------------|---|---|----------|
| 2934 | GPX8 Probable glutathione peroxidase 8                           | IPI00291695,IPI00910821                                     | 23,891.70  | 153 | 163 | FLVDSSKKEPR             | R | W | 1,305.72 |
| 2935 | REEP6 Receptor accessory protein 6, isoform CRA_a                | IPI00646963,IPI00647161                                     | 23,401.20  | 154 | 161 | IMNDLSGR                | R | A | 921.446  |
| 2936 | RHOT1 Isoform 3 of Mitochondrial Rho GTPase 1                    | IPI00217536,IPI00432452,IPI00651681,IPI00759714,IPI00759775 | 79,531.40  | 154 | 164 | NISELFYYAQK             | K | A | 1,375.69 |
| 2937 | RHOT2 Isoform 1 of Mitochondrial Rho GTPase 2                    | IPI00465059                                                 | 68,099.60  | 154 | 164 | NISELFYYAQK             | R | A | 1,375.69 |
| 2938 | PSMD7 26S proteasome non-ATPase regulatory subunit 7             | IPI00019927                                                 | 37,007.50  | 154 | 177 | TFEHTVSEIGAEAEVGVVEHLLR | K | D | 2,681.31 |
| 2939 | RARS Isoform Complexed of Arginyl-tRNA synthetase, cytoplasmic   | IPI00004860                                                 | 75,364.00  | 154 | 168 | VEIAGPGFINVHLRK         | K | D | 1,649.95 |
| 2940 | MMACHC Methylmalonic aciduria and homocystinuria type C protein  | IPI00001053                                                 | 31,710.90  | 154 | 161 | FGGWFAIR                | R | G | 953.4992 |
| 2941 | RAC1 Isoform A of Ras-related C3 botulinum toxin substrate 1     | IPI00010271,IPI00219675                                     | 21,432.60  | 154 | 163 | YLECSALTQR              | K | G | 1,240.60 |
| 2942 | RAC1 Isoform A of Ras-related C3 botulinum toxin substrate 1     | IPI00010271,IPI00219675                                     | 21,432.60  | 154 | 163 | YLECSALTQR              | K | G | 1,240.60 |
| 2943 | RAC3 Ras-related C3 botulinum toxin substrate 3                  | IPI00023138                                                 | 21,361.10  | 154 | 163 | YLECSALTQR              | K | G | 1,240.60 |
| 2944 | CDC42 Isoform 2 of Cell division control protein 42 homolog      | IPI00016786,IPI00909484                                     | 21,240.70  | 154 | 163 | YVECSALTQK              | K | G | 1,198.58 |
| 2945 | RAB18 Ras-related protein Rab-18                                 | IPI00014577                                                 | 22,959.50  | 154 | 168 | TCDGVQCAFEELVEK         | K | I | 1,784.78 |
| 2946 | RBM39 Isoform 1 of RNA-binding protein 39                        | IPI00163505,IPI00215801                                     | 59,363.40  | 154 | 163 | TVFCMQLAAR              | R | I | 1,196.59 |
| 2947 | PSMB2 Proteasome subunit beta type-2                             | IPI00028006                                                 | 22,819.50  | 154 | 161 | ERAVELLR                | R | K | 985.5789 |
| 2948 | RAB1B Ras-related protein Rab-1B                                 | IPI00008964,IPI00896425                                     | 22,154.00  | 154 | 170 | NATNVEQAFMTMAAEIK       | K | K | 1,884.88 |
| 2949 | YWHAE 14-3-3 protein epsilon                                     | IPI00000816                                                 | 29,157.00  | 154 | 170 | AASDIAMTELPPTHPIR       | K | L | 1,835.93 |
| 2950 | YWHAE 14-3-3 protein epsilon                                     | IPI00000816                                                 | 29,157.00  | 154 | 170 | AASDIAMTELPPTHPIR       | K | L | 1,819.94 |
| 2951 | ST13 Hsc70-interacting protein                                   | IPI00032826                                                 | 41,314.40  | 154 | 160 | RASVFK                  | K | L | 806.4882 |
| 2952 | STIP1 Stress-induced-phosphoprotein 1                            | IPI00013894,IPI00871856                                     | 62,624.10  | 154 | 160 | ELIEQLR                 | R | N | 900.515  |
| 2953 | COPB1 Coatamer subunit beta                                      | IPI00295851                                                 | 107,128.00 | 154 | 164 | NAVLAITYYR              | R | N | 1,296.73 |
| 2954 | MORF4L2 Mortality factor 4-like protein 2                        | IPI00014174                                                 | 32,290.70  | 154 | 167 | NVDAILEEYANCKK          | K | S | 1,666.81 |
| 2955 | ALDOA Fructose-bisphosphate aldolase A                           | IPI00465439                                                 | 39,402.60  | 154 | 173 | IGEHTPSALAIMENANVLAR    | K | Y | 2,123.09 |
| 2956 | SKP1 Isoform 1 of S-phase kinase-associated protein 1            | IPI00301364                                                 | 18,640.30  | 155 | 163 | KENQWCEEK               | R | - | 1,250.55 |
| 2957 | PPIA Peptidyl-prolyl cis-trans isomerase A                       | IPI00419585,IPI00887678                                     | 17,994.90  | 155 | 165 | KITIADCGQLE             | K | - | 1,247.63 |
| 2958 | RAB10 Ras-related protein Rab-10                                 | IPI00016513                                                 | 22,524.10  | 155 | 161 | ANINIEK                 | K | A | 801.4465 |
| 2959 | HMGB2 High mobility group protein B2                             | IPI00219097                                                 | 24,016.60  | 155 | 163 | YEKDIAAYR               | K | A | 1,128.57 |
| 2960 | HMGB1 High mobility group protein B1                             | IPI00419258                                                 | 24,876.70  | 155 | 163 | YEKDIAAYR               | K | A | 1,128.57 |
| 2961 | SKP2 Isoform 2 of S-phase kinase-associated protein 2            | IPI00013294,IPI00163172,IPI00178899                         | 46,558.70  | 155 | 164 | LLSQGVIAFR              | R | C | 1,103.66 |
| 2962 | TUBB2C Tubulin beta-2C chain                                     | IPI00007752                                                 | 49,812.70  | 155 | 162 | IREEYPDR                | K | I | 1,077.53 |
| 2963 | TUBB Tubulin beta chain                                          | IPI00011654                                                 | 49,652.60  | 155 | 162 | IREEYPDR                | K | I | 1,077.53 |
| 2964 | TUBB2A Tubulin beta-2A chain                                     | IPI00013475,IPI00031370                                     | 49,889.10  | 155 | 162 | IREEYPDR                | K | I | 1,077.53 |
| 2965 | HSPH1 Isoform Beta of Heat shock protein 105 kDa                 | IPI00218993,IPI00513743                                     | 92,099.00  | 155 | 169 | SVLDAAQIVGLNCLR         | R | L | 1,628.88 |
| 2966 | HSPA4 Heat shock 70 kDa protein 4                                | IPI00002966                                                 | 94,313.90  | 155 | 169 | SVMDATQIAGLNCLR         | R | L | 1,664.81 |
| 2967 | EEF1A1 Elongation factor 1-alpha 1                               | IPI00396485                                                 | 50,123.20  | 155 | 165 | MDSTEPYSQK              | K | R | 1,298.56 |
| 2968 | SET Isoform 1 of Protein SET                                     | IPI00072377                                                 | 33,471.40  | 155 | 167 | EFHLNESGDPSSK           | K | S | 1,446.65 |
| 2969 | PPIA Peptidyl-prolyl cis-trans isomerase A                       | IPI00419585,IPI00887678                                     | 17,994.90  | 156 | 165 | ITIADCGQLE              | K | - | 1,119.54 |
| 2970 | MXRA7 Isoform 2 of Matrix-remodeling-associated protein 7        | IPI00397645,IPI00749188                                     | 17,475.40  | 156 | 170 | MMTKEELEEQRTEE          | K | - | 1,943.82 |
| 2971 | NAT13 Isoform 1 of N-acetyltransferase 13                        | IPI00018627                                                 | 19,380.90  | 156 | 169 | VPSGQNAVQKTDN           | K | - | 1,472.70 |
| 2972 | PSMB2 Proteasome subunit beta type-2                             | IPI00028006                                                 | 22,819.50  | 156 | 162 | AVELLRK                 | R | C | 828.5302 |
| 2973 | CTBP1 C-terminal-binding protein 1                               | IPI00012835,IPI00554626                                     | 47,517.40  | 156 | 163 | VQSVEQIR                | R | E | 958.5316 |
| 2974 | DDI2 Isoform 3 of Protein DDI1 homolog 2                         | IPI00031618,IPI00796836,IPI00845258                         | 46,553.90  | 156 | 170 | NPPLAEALLSGDLEK         | R | F | 1,566.84 |
| 2975 | AK1 Adenylate kinase isoenzyme 1                                 | IPI00018342,IPI00640817                                     | 21,617.10  | 156 | 167 | ATEPVIAFYEKR            | K | G | 1,423.76 |
| 2976 | HNRNPAB Isoform 3 of Heterogeneous nuclear ribonucleoprotein A/B | IPI00334713                                                 | 30,570.20  | 156 | 169 | IFVGGLNPEATEEK          | K | I | 1,503.77 |

|      |                                                                           |                                     |           |     |     |                                          |   |   |          |
|------|---------------------------------------------------------------------------|-------------------------------------|-----------|-----|-----|------------------------------------------|---|---|----------|
| 2977 | HNRNPAB Isoform 3 of Heterogeneous nuclear ribonucleoprotein A/B          | IPI00334713                         | 30,570.20 | 156 | 169 | IFVGGGLNPEATEEK                          | K | I | 1,503.77 |
| 2978 | HSPA1A;HSPA1B Heat shock 70 kDa protein 1                                 | IPI00304925                         | 70,036.00 | 156 | 171 | QATKDAGVIAGLNVLR                         | R | I | 1,625.93 |
| 2979 | EIF2B3 Isoform 1 of Translation initiation factor eIF-2B subunit gamma    | IPI00006504                         | 50,223.30 | 156 | 166 | DFIGVDSTGKR                              | R | L | 1,194.61 |
| 2980 | PPA1 Inorganic pyrophosphatase                                            | IPI00015018                         | 32,642.60 | 156 | 177 | VIAINVDDPDAANYNDINDVK                    | K | L | 2,444.21 |
| 2981 | NAT13 Isoform 1 of N-acetyltransferase 13                                 | IPI00018627                         | 19,380.90 | 156 | 166 | VPSGQNADVQK                              | K | T | 1,142.58 |
| 2982 | NAT13 Isoform 1 of N-acetyltransferase 13                                 | IPI00018627                         | 19,380.90 | 156 | 166 | VPSGQNADVQK                              | K | T | 1,142.58 |
| 2983 | PRDX6 Peroxiredoxin-6                                                     | IPI00220301                         | 25,018.10 | 156 | 162 | NFDEILR                                  | R | V | 906.468  |
| 2984 | CASP3 Caspase-3                                                           | IPI00292140                         | 31,591.00 | 157 | 164 | LFIIQACR                                 | K | G | 1,020.57 |
| 2985 | CIP29 Nuclear protein Hcc-1                                               | IPI00014938,IPI00795769             | 23,653.20 | 157 | 166 | FGLNVSSISR                               | R | K | 1,079.58 |
| 2986 | TUBA1A Tubulin alpha-1A chain                                             | IPI00180675                         | 50,117.70 | 157 | 163 | LSVDYGK                                  | R | K | 781.4091 |
| 2987 | TUBA1C Tubulin alpha-1C chain                                             | IPI00218343                         | 49,877.40 | 157 | 163 | LSVDYGK                                  | R | K | 781.4091 |
| 2988 | TUBA1B Tubulin alpha-1B chain                                             | IPI00387144,IPI00792677             | 50,133.70 | 157 | 163 | LSVDYGK                                  | R | K | 781.4091 |
| 2989 | RAB1A Isoform 1 of Ras-related protein Rab-1A                             | IPI00005719,IPI00873902             | 22,660.40 | 157 | 173 | NATNVEQSFMTMAAEIK                        | K | K | 1,900.88 |
| 2990 | DRG2 Developmentally-regulated GTP-binding protein 2                      | IPI00022697,IPI00794194             | 40,729.80 | 157 | 169 | SLLEKELESVGIR                            | R | L | 1,472.83 |
| 2991 | HSD17B12 Estradiol 17-beta-dehydrogenase 12                               | IPI00007676                         | 34,307.40 | 157 | 167 | MININILSVCK                              | K | M | 1,304.71 |
| 2992 | TUBA1A Tubulin alpha-1A chain                                             | IPI00180675                         | 50,117.70 | 157 | 164 | LSVDYGKK                                 | R | S | 909.5041 |
| 2993 | TUBA1C Tubulin alpha-1C chain                                             | IPI00218343                         | 49,877.40 | 157 | 164 | LSVDYGKK                                 | R | S | 909.5041 |
| 2994 | TUBA1B Tubulin alpha-1B chain                                             | IPI00387144,IPI00792677             | 50,133.70 | 157 | 164 | LSVDYGKK                                 | R | S | 909.5041 |
| 2995 | AURKA Serine/threonine-protein kinase 6                                   | IPI00298940                         | 45,791.80 | 157 | 162 | FILALK                                   | K | V | 704.4706 |
| 2996 | CKB Creatine kinase B-type                                                | IPI00022977                         | 42,627.10 | 157 | 172 | LAVEALSSLDGDLAGR                         | K | Y | 1,586.84 |
| 2997 | DHRS7 Isoform 1 of Dehydrogenase/reductase SDR family member 7            | IPI00006957,IPI00339238             | 38,281.90 | 158 | 171 | LIELNYLGTVSLTK                           | K | C | 1,563.90 |
| 2998 | ILVBL Isoform 1 of Acetolactate synthase-like protein                     | IPI00554541,IPI00556135             | 67,849.10 | 158 | 174 | GALQAVDQLSLFRPLCK                        | R | F | 1,916.04 |
| 2999 | LDHA Isoform 1 of L-lactate dehydrogenase A chain                         | IPI00217966                         | 36,671.20 | 158 | 169 | VIGSGCNLDSAR                             | R | F | 1,248.60 |
| 3000 | LDHA Isoform 1 of L-lactate dehydrogenase A chain                         | IPI00217966                         | 36,671.20 | 158 | 169 | VIGSGCNLDSAR                             | R | F | 1,248.60 |
| 3001 | NIT2 Nitrilase homolog 2                                                  | IPI00549467,IPI00872668             | 30,590.80 | 158 | 168 | FAELAQIYAQR                              | R | G | 1,309.69 |
| 3002 | NPM1 Isoform 2 of Nucleophosmin                                           | IPI00220740,IPI00549248             | 29,446.90 | 158 | 194 | LAADEDDEEDDEEDDEEDDD<br>DDDFDEEAEEKAPVKK | K | G | 4,246.55 |
| 3003 | ARL15 ADP-ribosylation factor-like protein 15                             | IPI00005163                         | 22,859.10 | 158 | 166 | YFELEPLAR                                | K | G | 1,137.59 |
| 3004 | RPS8 40S ribosomal protein S8                                             | IPI00216587,IPI00872430             | 24,188.40 | 158 | 170 | ISSLLEEQFQQGK                            | K | L | 1,506.78 |
| 3005 | RPS8 40S ribosomal protein S8                                             | IPI00216587,IPI00872430             | 24,188.40 | 158 | 170 | ISSLLEEQFQQGK                            | K | L | 1,506.78 |
| 3006 | YWHAQ 14-3-3 protein theta                                                | IPI00018146                         | 27,747.40 | 158 | 167 | KEMQPTHPIR                               | K | L | 1,252.65 |
| 3007 | YWHAZ 14-3-3 protein zeta/delta                                           | IPI00021263                         | 27,727.90 | 158 | 167 | KEMQPTHPIR                               | K | L | 1,252.65 |
| 3008 | YWHAB Isoform Short of 14-3-3 protein beta/alpha                          | IPI00759832                         | 27,832.80 | 158 | 167 | KEMQPTHPIR                               | K | L | 1,252.65 |
| 3009 | RAB7A Ras-related protein Rab-7a                                          | IPI00016342                         | 23,472.00 | 158 | 171 | EAINVEQAFQTIAR                           | K | N | 1,589.83 |
| 3010 | TMPO Isoform Beta of Lamina-associated polypeptide 2, isoforms beta/gamma | IPI00030131                         | 50,653.40 | 158 | 173 | SSTPLPTISSSAENTR                         | R | Q | 1,647.82 |
| 3011 | TMPO Lamina-associated polypeptide 2, isoform alpha                       | IPI00216230                         | 75,475.80 | 158 | 173 | SSTPLPTISSSAENTR                         | R | Q | 1,647.82 |
| 3012 | TMPO Lamina-associated polypeptide 2, isoform alpha                       | IPI00216230                         | 75,475.80 | 158 | 173 | SSTPLPTISSSAENTR                         | R | Q | 1,647.82 |
| 3013 | TMPO Lamina-associated polypeptide 2, isoform alpha                       | IPI00216230                         | 75,475.80 | 158 | 173 | SSTPLPTISSSAENTR                         | R | Q | 1,647.82 |
| 3014 | HDGF Hepatoma-derived growth factor                                       | IPI00020956                         | 26,770.50 | 158 | 167 | AGDLLEDSPK                               | R | R | 1,044.52 |
| 3015 | PHB2 Prohibitin-2                                                         | IPI00027252                         | 33,279.60 | 158 | 165 | AQVSLIR                                  | R | R | 899.5673 |
| 3016 | UHRF1 ubiquitin-like with PHD and ring finger domains 1 isoform 2         | IPI00797279,IPI00797945             | 91,082.30 | 158 | 171 | DTNMGAWFEAQVVR                           | R | V | 1,639.75 |
| 3017 | DNAJB1 DnaJ homolog subfamily B member 1                                  | IPI00015947                         | 38,027.60 | 158 | 169 | KKQDPPVTHDLR                             | R | V | 1,433.79 |
| 3018 | CNN3 Calponin-3                                                           | IPI00216682,IPI00873410,IPI00909623 | 36,396.60 | 159 | 172 | AGQSVIGLQMGTKN                           | K | C | 1,419.73 |

|      |                                                                                         |                                     |            |     |     |                           |   |   |          |
|------|-----------------------------------------------------------------------------------------|-------------------------------------|------------|-----|-----|---------------------------|---|---|----------|
| 3019 | ILF3 Isoform 1 of Interleukin enhancer-binding factor 3                                 | IPI00298788                         | 95,320.90  | 159 | 177 | NTKEPPLSLTIHLTSPVVR       | K | E | 2,102.20 |
| 3020 | LDHB L-lactate dehydrogenase B chain                                                    | IPI00219217                         | 36,620.60  | 159 | 170 | VIGSGCNLDSAR              | R | F | 1,248.60 |
| 3021 | LDHB L-lactate dehydrogenase B chain                                                    | IPI00219217                         | 36,620.60  | 159 | 170 | VIGSGCNLDSAR              | R | F | 1,248.60 |
| 3022 | DHFR Dihydrofolate reductase                                                            | IPI00030357,IPI00887771             | 21,435.30  | 159 | 174 | LLPEYPGVLSDVQEEK          | K | G | 1,815.94 |
| 3023 | PRDX1 Peroxiredoxin-1                                                                   | IPI00000874                         | 22,092.90  | 159 | 168 | LVQAFQFTDK                | R | H | 1,196.63 |
| 3024 | SCYE1 Multisynthetase complex auxiliary component p43                                   | IPI00006252,IPI00793201             | 34,335.00  | 159 | 166 | IGCIITAR                  | R | K | 903.5082 |
| 3025 | YWHAQ 14-3-3 protein theta                                                              | IPI00018146                         | 27,747.40  | 159 | 167 | EMQPTHPIR                 | K | L | 1,108.56 |
| 3026 | YWHAZ 14-3-3 protein zeta/delta                                                         | IPI00021263                         | 27,727.90  | 159 | 167 | EMQPTHPIR                 | K | L | 1,108.56 |
| 3027 | YWHAB Isoform Short of 14-3-3 protein beta/alpha                                        | IPI00759832                         | 27,832.80  | 159 | 167 | EMQPTHPIR                 | K | L | 1,108.56 |
| 3028 | THOC1 THO complex subunit 1                                                             | IPI00305374                         | 75,650.80  | 159 | 165 | IQLFLAR                   | R | L | 860.5353 |
| 3029 | PLS3 plastin 3                                                                          | IPI00216694                         | 70,795.90  | 159 | 168 | AVGDGIVLCK                | K | M | 1,031.56 |
| 3030 | BUB3 Mitotic checkpoint protein BUB3                                                    | IPI00013468,IPI00514701,IPI00644108 | 37,136.70  | 159 | 165 | VLVWDLR                   | R | N | 900.5302 |
| 3031 | BUB3 Mitotic checkpoint protein BUB3                                                    | IPI00013468,IPI00514701,IPI00644108 | 37,136.70  | 159 | 165 | VLVWDLR                   | R | N | 900.5302 |
| 3032 | - cDNA FLJ54554, highly similar to Pyruvate kinase isozymes M1/M2                       | IPI00910979                         | 56,255.30  | 159 | 171 | IYVDDGLISLQVK             | K | Q | 1,462.82 |
| 3033 | UBE2M NEDD8-conjugating enzyme Ubc12                                                    | IPI00022597                         | 20,882.90  | 159 | 166 | LFEQNVQR                  | R | S | 1,033.54 |
| 3034 | NP cDNA FLJ25678 fis, clone TST04067, highly similar to PURINE NUCLEOSIDE PHOSPHORYLASE | IPI00017672,IPI00871140             | 32,533.50  | 159 | 172 | FGDRFPAMSDAYDR            | R | T | 1,663.72 |
| 3035 | CKAP5 Isoform 1 of Cytoskeleton-associated protein 5                                    | IPI00028275,IPI00472887             | 225,483.70 | 159 | 167 | IILLKPIIK                 | K | V | 1,050.77 |
| 3036 | ILF3 Isoform 1 of Interleukin enhancer-binding factor 3                                 | IPI00298788                         | 95,320.90  | 159 | 182 | NTKEPPLSLTIHLTSPVVREEM EK | K | V | 2,764.46 |
| 3037 | NUDC Nuclear migration protein nudC                                                     | IPI00550746                         | 38,225.70  | 159 | 173 | LKPNLNGADLPNYR            | K | W | 1,641.87 |
| 3038 | CAPNS1 Calpain small subunit 1                                                          | IPI00025084                         | 28,298.60  | 159 | 165 | LGFEFEFK                  | K | Y | 869.4404 |
| 3039 | SEC22B Vesicle-trafficking protein SEC22b                                               | IPI00006865                         | 24,723.40  | 160 | 169 | GEALSALDSK                | R | A | 990.5103 |
| 3040 | ACSL3 Long-chain-fatty-acid--CoA ligase 3                                               | IPI00031397                         | 80,405.10  | 160 | 169 | TNIAIFCETR                | K | A | 1,224.60 |
| 3041 | PGRMC2 Membrane-associated progesterone receptor component 2                            | IPI00005202                         | 26,152.90  | 160 | 173 | FYGPAGPYGIFAGR            | K | D | 1,472.73 |
| 3042 | HSPA8 Isoform 1 of Heat shock cognate 71 kDa protein                                    | IPI00003865                         | 70,881.80  | 160 | 171 | DAGTIAGLNVLR              | K | I | 1,199.67 |
| 3043 | HSPA1A;HSPA1B Heat shock 70 kDa protein 1                                               | IPI00304925                         | 70,036.00  | 160 | 171 | DAGVIAGLNVLR              | K | I | 1,197.70 |
| 3044 | HSPA1A;HSPA1B Heat shock 70 kDa protein 1                                               | IPI00304925                         | 70,036.00  | 160 | 171 | DAGVIAGLNVLR              | K | I | 1,197.70 |
| 3045 | HSPA1A;HSPA1B Heat shock 70 kDa protein 1                                               | IPI00304925                         | 70,036.00  | 160 | 171 | DAGVIAGLNVLR              | K | I | 1,197.70 |
| 3046 | HSPA1A;HSPA1B Heat shock 70 kDa protein 1                                               | IPI00304925                         | 70,036.00  | 160 | 171 | DAGVIAGLNVLR              | K | I | 1,197.70 |
| 3047 | HSPA1A;HSPA1B Heat shock 70 kDa protein 1                                               | IPI00304925                         | 70,036.00  | 160 | 171 | DAGVIAGLNVLR              | K | I | 1,197.70 |
| 3048 | HSPA1A;HSPA1B Heat shock 70 kDa protein 1                                               | IPI00304925                         | 70,036.00  | 160 | 171 | DAGVIAGLNVLR              | K | I | 1,197.70 |
| 3049 | DRG1 Developmentally-regulated GTP-binding protein 1                                    | IPI00031836                         | 40,525.80  | 160 | 171 | IIENELEGFGIR              | K | L | 1,389.74 |
| 3050 | ARL6IP5 PRA1 family protein 3                                                           | IPI00007426,IPI00908696             | 21,597.60  | 160 | 178 | TPMGIVLDALEQQEEGINR       | R | L | 2,129.05 |
| 3051 | HSPA9 Stress-70 protein, mitochondrial                                                  | IPI00007765                         | 73,663.30  | 160 | 173 | LYSPSQIGAFVLMK            | K | M | 1,569.83 |
| 3052 | BCAP31 B-cell receptor-associated protein 31                                            | IPI00218200,IPI00642984             | 27,974.60  | 160 | 182 | GAAVDGGKLDVGNAEVKLEE ENR  | K | S | 2,370.19 |
| 3053 | EIF2AK2 Interferon-induced, double-stranded RNA-activated protein kinase                | IPI00019463,IPI00385404             | 62,079.10  | 160 | 173 | LAYLQILSEETSVK            | K | S | 1,593.87 |
| 3054 | MEA1 male-enhanced antigen                                                              | IPI00157176                         | 19,886.00  | 161 | 173 | EISDAQWEDVVQK             | R | A | 1,546.74 |
| 3055 | TMCO1 Isoform 1 of Transmembrane and coiled-coil domain-containing protein 1            | IPI00026111,IPI00761107             | 21,158.30  | 161 | 168 | ILGLAPSR                  | K | A | 826.5146 |
| 3056 | TMCO1 Isoform 1 of Transmembrane and coiled-coil domain-containing protein 1            | IPI00026111,IPI00761107             | 21,158.30  | 161 | 168 | ILGLAPSR                  | K | A | 826.5146 |
| 3057 | ST13 Hsc70-interacting protein                                                          | IPI00032826                         | 41,314.40  | 161 | 169 | LQKPNAAIR                 | K | D | 1,010.61 |
| 3058 | GNPDA1 Glucosamine-6-phosphate isomerase 1                                              | IPI00009305                         | 32,651.40  | 161 | 172 | TLAMDTILANAR              | K | F | 1,289.69 |
| 3059 | CDK6 Cell division protein kinase 6                                                     | IPI00023529                         | 36,920.80  | 161 | 168 | LADFLAR                   | K | I | 862.4782 |
| 3060 | PELO Protein pelota homolog                                                             | IPI00106698                         | 43,358.40  | 161 | 169 | AKVEVNIPR                 | R | K | 1,025.61 |

|      |                                                                                                   |                         |           |     |     |                                |   |   |          |
|------|---------------------------------------------------------------------------------------------------|-------------------------|-----------|-----|-----|--------------------------------|---|---|----------|
| 3061 | GDI2 cDNA FLJ60299, highly similar to Rab GDP dissociation inhibitor beta                         | IPI00031461             | 51,138.50 | 161 | 168 | TFEGIDPK                       | R | K | 906.4569 |
| 3062 | TAGLN2 Transgelin-2                                                                               | IPI00550363             | 22,373.90 | 161 | 171 | NFSDNQLQEGK                    | R | N | 1,279.59 |
| 3063 | FAM54B cDNA FLJ55391                                                                              | IPI00071826,IPI00645882 | 35,260.70 | 161 | 172 | TTELQDELSHLR                   | R | S | 1,441.73 |
| 3064 | SMU1 WD40 repeat-containing protein SMU1                                                          | IPI00305833             | 57,526.80 | 161 | 170 | LMALLGQALK                     | R | W | 1,057.64 |
| 3065 | DHRS7B Dehydrogenase/reductase SDR family member 7B                                               | IPI00550165,IPI00871975 | 35,101.90 | 162 | 175 | VMETNYFGPVALTK                 | R | A | 1,585.79 |
| 3066 | DCXR L-xylulose reductase                                                                         | IPI00448095,IPI00797249 | 25,894.20 | 162 | 171 | VMALELGPBK                     | K | I | 1,094.60 |
| 3067 | ILKAP Integrin-linked kinase-associated serine/threonine phosphatase 2C                           | IPI00006164             | 42,889.20 | 162 | 173 | FAAQLNHQNLIR                   | K | K | 1,424.78 |
| 3068 | PEBP1 Phosphatidylethanolamine-binding protein 1                                                  | IPI00219446             | 21,038.90 | 162 | 179 | APVAGTCYQAEWDDYVPK             | R | L | 2,069.93 |
| 3069 | BLVRA Biliverdin reductase A                                                                      | IPI00294158             | 33,411.00 | 162 | 172 | FGFPAFSGISR                    | R | L | 1,185.61 |
| 3070 | REEP6 Receptor accessory protein 6, isoform CRA a                                                 | IPI00646963,IPI00647161 | 23,401.20 | 162 | 171 | ALDAAAGITR                     | R | N | 958.5317 |
| 3071 | PBK cDNA FLJ58333, highly similar to T-lymphokine-activated killer cell-originated protein kinase | IPI00306708             | 37,194.90 | 162 | 169 | KLLHGDIK                       | K | S | 923.5675 |
| 3072 | RHEB GTP-binding protein Rheb                                                                     | IPI00016669             | 20,479.90 | 162 | 178 | RIILEAEKMDGAASQGGK             | R | S | 1,832.95 |
| 3073 | ENO1 Isoform alpha-enolase of Alpha-enolase                                                       | IPI00465248             | 47,152.20 | 163 | 179 | LAMQEFMILPVGAAANFR             | K | E | 1,939.98 |
| 3074 | RSL1D1 Ribosomal L1 domain-containing protein 1                                                   | IPI00008708,IPI00642046 | 54,956.70 | 163 | 171 | RLLPSLIGR                      | R | H | 1,024.66 |
| 3075 | EEF2 Elongation factor 2                                                                          | IPI00186290             | 95,322.10 | 163 | 180 | ALLELQLEPEELYQTFQR             | R | I | 2,220.15 |
| 3076 | PSMD10 26S proteasome non-ATPase regulatory subunit 10                                            | IPI00003565,IPI00027699 | 24,410.20 | 163 | 189 | ASTNIQDTEGNTPLHLACDEE<br>RVEEK | K | L | 3,027.40 |
| 3077 | PSAT1 cDNA FLJ56437, highly similar to Phosphoserine aminotransferase                             | IPI00001734             | 45,338.10 | 163 | 172 | FGTINIVHPK                     | K | L | 1,125.64 |
| 3078 | SNRNP40 cDNA FLJ56825, highly similar to WD repeat protein 57                                     | IPI00006723             | 44,498.40 | 163 | 177 | GPQLVCTGSDDGTVK                | R | L | 1,533.72 |
| 3079 | NUSAP1 Isoform 2 of Nucleolar and spindle-associated protein 1                                    | IPI00020484             | 49,306.70 | 163 | 174 | SLYTDESSKPGK                   | K | N | 1,311.64 |
| 3080 | C8orf55 UPF0670 protein C8orf55                                                                   | IPI00171421             | 23,847.60 | 163 | 170 | VVQHLQQR                       | R | R | 1,039.55 |
| 3081 | GAPDH Glyceraldehyde-3-phosphate dehydrogenase                                                    | IPI00219018             | 36,035.30 | 163 | 186 | VIHDNFGIVEGLMTTVHAITAT<br>QK   | K | T | 2,611.36 |
| 3082 | TUBB2A Tubulin beta-2A chain                                                                      | IPI00013475,IPI00031370 | 49,889.10 | 163 | 174 | IMNTFSVMPSPK                   | R | V | 1,367.67 |
| 3083 | TUBB2A Tubulin beta-2A chain                                                                      | IPI00013475,IPI00031370 | 49,889.10 | 163 | 174 | IMNTFSVMPSPK                   | R | V | 1,367.67 |
| 3084 | TUBB2C Tubulin beta-2C chain                                                                      | IPI00007752             | 49,812.70 | 163 | 174 | IMNTFSVVPSPK                   | R | V | 1,335.70 |
| 3085 | TUBB2C Tubulin beta-2C chain                                                                      | IPI00007752             | 49,812.70 | 163 | 174 | IMNTFSVVPSPK                   | R | V | 1,319.70 |
| 3086 | TUBB2C Tubulin beta-2C chain                                                                      | IPI00007752             | 49,812.70 | 163 | 174 | IMNTFSVVPSPK                   | R | V | 1,319.70 |
| 3087 | TUBB2C Tubulin beta-2C chain                                                                      | IPI00007752             | 49,812.70 | 163 | 174 | IMNTFSVVPSPK                   | R | V | 1,319.70 |
| 3088 | TUBB2C Tubulin beta-2C chain                                                                      | IPI00007752             | 49,812.70 | 163 | 174 | IMNTFSVVPSPK                   | R | V | 1,335.70 |
| 3089 | TUBB2C Tubulin beta-2C chain                                                                      | IPI00007752             | 49,812.70 | 163 | 174 | IMNTFSVVPSPK                   | R | V | 1,319.70 |
| 3090 | TUBB Tubulin beta chain                                                                           | IPI00011654             | 49,652.60 | 163 | 174 | IMNTFSVVPSPK                   | R | V | 1,335.70 |
| 3091 | TUBB Tubulin beta chain                                                                           | IPI00011654             | 49,652.60 | 163 | 174 | IMNTFSVVPSPK                   | R | V | 1,319.70 |
| 3092 | TUBB Tubulin beta chain                                                                           | IPI00011654             | 49,652.60 | 163 | 174 | IMNTFSVVPSPK                   | R | V | 1,319.70 |
| 3093 | TUBB Tubulin beta chain                                                                           | IPI00011654             | 49,652.60 | 163 | 174 | IMNTFSVVPSPK                   | R | V | 1,335.70 |
| 3094 | TUBB Tubulin beta chain                                                                           | IPI00011654             | 49,652.60 | 163 | 174 | IMNTFSVVPSPK                   | R | V | 1,319.70 |
| 3095 | VDAC3 Isoform 1 of Voltage-dependent anion-selective channel protein 3                            | IPI00031804,IPI00294779 | 30,641.90 | 164 | 174 | LSQNNFALGYK                    | K | A | 1,254.65 |
| 3096 | ABCF1 Isoform 2 of ATP-binding cassette sub-family F member 1                                     | IPI00013495,IPI00873899 | 91,664.60 | 164 | 174 | AVSEEQQPALK                    | K | G | 1,199.63 |
| 3097 | RPL8 60S ribosomal protein L8                                                                     | IPI00012772             | 28,006.80 | 164 | 174 | AVGVVAGGGR                     | R | I | 941.5527 |
| 3098 | PNPO Pyridoxine-5'-phosphate oxidase                                                              | IPI00018272,IPI00793232 | 29,970.20 | 164 | 185 | SSQIGAVVSHQSSVIPDREYL<br>R     | K | K | 2,428.26 |
| 3099 | PAFAH1B1 Isoform 1 of Platelet-activating factor acetylhydrolase IB subunit alpha                 | IPI00218728             | 46,619.40 | 164 | 175 | LLASCSADMTIK                   | K | L | 1,325.64 |
| 3100 | EEF1B2 Elongation factor 1-beta                                                                   | IPI00178440             | 24,746.20 | 164 | 176 | SIQADGLVWGSSK                  | R | L | 1,347.69 |

|      |                                                                                             |                                                             |            |     |     |                                   |   |          |
|------|---------------------------------------------------------------------------------------------|-------------------------------------------------------------|------------|-----|-----|-----------------------------------|---|----------|
| 3101 | MMGT1 cDNA FLJ54627, highly similar to Homo sapiens transmembrane protein 32 (TMEM32), mRNA | IPI00166785                                                 | 21,864.30  | 164 | 187 | VLFRPSDTANSSNQDALSSNT R<br>SLK    | L | 2,552.26 |
| 3102 | PGD 6-phosphogluconate dehydrogenase, decarboxylating                                       | IPI00219525,IPI00747533                                     | 53,123.90  | 164 | 184 | VGTGEPCCDWVWGDEGAGHF K<br>VK      | M | 2,276.97 |
| 3103 | GRHPR Glyoxylate reductase/hydroxypyruvate reductase                                        | IPI00037448                                                 | 35,651.10  | 164 | 170 | IGQAIAR                           | R | 728.4414 |
| 3104 | PRPS1 Ribose-phosphate pyrophosphokinase 1                                                  | IPI00219616,IPI00917169                                     | 34,816.70  | 164 | 176 | NCTIVSPDAGGAK                     | R | 1,289.62 |
| 3105 | ARCN1 Putative uncharacterized protein                                                      | IPI00298520,IPI00514053                                     | 61,581.40  | 164 | 172 | ENVNLAQIR                         | R | 1,056.58 |
| 3106 | VDAC1 Voltage-dependent anion-selective channel protein 1                                   | IPI00216308                                                 | 30,755.90  | 164 | 174 | VTQSNFAVGYK                       | R | 1,213.62 |
| 3107 | PRPS1 Ribose-phosphate pyrophosphokinase 1                                                  | IPI00219616,IPI00917169                                     | 34,816.70  | 164 | 177 | NCTIVSPDAGGAKR                    | R | 1,445.72 |
| 3108 | MAP2K2 Dual specificity mitogen-activated protein kinase kinase 2                           | IPI00003783                                                 | 44,407.20  | 164 | 172 | RIPEEILGK                         | K | 1,054.63 |
| 3109 | TPT1 Translationally-controlled tumor protein                                               | IPI00550900                                                 | 19,578.20  | 165 | 172 | DGLEMEKC                          | K | 981.4018 |
| 3110 | WDR77 Methylosome protein 50                                                                | IPI00012202                                                 | 36,705.20  | 165 | 179 | AHAAQVTCVAASPHK                   | R | 1,547.77 |
| 3111 | DDX5 Probable ATP-dependent RNA helicase DDX5                                               | IPI00017617                                                 | 69,131.70  | 165 | 177 | GDGPICLVLPATR                     | R | 1,368.73 |
| 3112 | ASRGL1 Isoform 1 of L-asparaginase                                                          | IPI00555734                                                 | 32,036.10  | 165 | 177 | NLGTGVAVALDCK                     | K | 1,317.68 |
| 3113 | SGTA Small glutamine-rich tetratricopeptide repeat-containing protein alpha                 | IPI00013949                                                 | 34,045.90  | 165 | 174 | MGLALSSLNK                        | R | 1,033.57 |
| 3114 | WDR77 Methylosome protein 50                                                                | IPI00012202                                                 | 36,705.20  | 165 | 191 | AHAAQVTCVAASPHKDSVFL R<br>SCSEDNR | R | 2,957.36 |
| 3115 | MDH1 Malate dehydrogenase, cytoplasmic                                                      | IPI00291005,IPI00915869                                     | 36,408.90  | 165 | 170 | AQIALK                            | K | 643.4138 |
| 3116 | GOSR2 Isoform A of Golgi SNAP receptor complex member 2                                     | IPI00023135,IPI00216965,IPI00788709,IPI00793112,IPI00795521 | 24,757.90  | 165 | 180 | ILDIANMLGLSNTVMR                  | K | 1,792.93 |
| 3117 | PSMB1 Proteasome subunit beta type-1                                                        | IPI00025019                                                 | 26,472.50  | 165 | 184 | AGGSASAMLQPLLDNQVGFK              | K | 2,020.02 |
| 3118 | BTF3 Isoform 1 of Transcription factor BTF3                                                 | IPI00221035                                                 | 22,150.30  | 165 | 171 | LAEALPK                           | R | 741.4506 |
| 3119 | RPL5 60S ribosomal protein L5                                                               | IPI00000494                                                 | 34,345.50  | 165 | 178 | GAVDGGLSIPHSTK                    | K | 1,338.70 |
| 3120 | CDC2 Putative uncharacterized protein                                                       | IPI00026689                                                 | 34,762.10  | 165 | 176 | VYTHEVTLWYR                       | R | 1,565.81 |
| 3121 | IK Protein Red                                                                              | IPI00011875,IPI00883647                                     | 65,615.20  | 165 | 173 | GLDFALLQK                         | K | 1,004.58 |
| 3122 | MDH2 Malate dehydrogenase, mitochondrial                                                    | IPI00291006                                                 | 35,485.70  | 166 | 176 | IFGVTTLDIVR                       | K | 1,233.72 |
| 3123 | RAB5B Ras-related protein Rab-5B                                                            | IPI00017344,IPI00908835                                     | 23,688.90  | 166 | 179 | TAMNVNDFLAIK                      | K | 1,536.81 |
| 3124 | - cDNA FLJ54408, highly similar to Heat shock 70 kDa protein 1                              | IPI00911039                                                 | 63,907.90  | 166 | 181 | ATAGDTHLGGEDFDNR                  | K | 1,675.73 |
| 3125 | PPP4R2 55 kDa protein                                                                       | IPI00022904,IPI00103654                                     | 54,507.00  | 166 | 179 | IVTGFNGIPFTIQR                    | K | 1,562.87 |
| 3126 | CSE1L Isoform 1 of Exportin-2                                                               | IPI00022744,IPI00219994                                     | 110,403.90 | 166 | 174 | SNELWTEIK                         | K | 1,119.57 |
| 3127 | PSMD1 Isoform 1 of 26S proteasome non-ATPase regulatory subunit 1                           | IPI00299608,IPI00456695                                     | 105,821.20 | 166 | 182 | TILESNDVPGMLAYSLK                 | K | 1,866.95 |
| 3128 | BUB3 Mitotic checkpoint protein BUB3                                                        | IPI00013468,IPI00514701,IPI00644108                         | 37,136.70  | 166 | 173 | NMGYVQQR                          | R | 1,011.47 |
| 3129 | CPNE8 cDNA FLJ25727 fis, clone TST05479                                                     | IPI00334276,IPI00384746                                     | 62,217.10  | 166 | 174 | SDPFLVFYR                         | K | 1,143.58 |
| 3130 | LCP1 Plastin-2                                                                              | IPI00010471                                                 | 70,274.10  | 166 | 178 | MINLSVPDTIDER                     | K | 1,518.75 |
| 3131 | EEF1A1 Elongation factor 1-alpha 1                                                          | IPI00396485                                                 | 50,123.20  | 167 | 172 | YEEIVK                            | R | 780.4138 |
| 3132 | EEF1A1 Elongation factor 1-alpha 1                                                          | IPI00396485                                                 | 50,123.20  | 167 | 172 | YEEIVK                            | R | 780.4138 |
| 3133 | EEF1A1 Elongation factor 1-alpha 1                                                          | IPI00396485                                                 | 50,123.20  | 167 | 180 | YEEIVKEVSTYIKK                    | R | 1,728.94 |
| 3134 | CDC42 Isoform 2 of Cell division control protein 42 homolog                                 | IPI00016786,IPI00909484                                     | 21,240.70  | 167 | 183 | NVFDEAILAALPEPEPK                 | K | 1,852.97 |
| 3135 | RAB5C Ras-related protein Rab-5C                                                            | IPI00016339                                                 | 23,464.70  | 167 | 180 | TAMNVNEIFMAIAK                    | K | 1,584.78 |
| 3136 | EEF1A1 Elongation factor 1-alpha 1                                                          | IPI00396485                                                 | 50,123.20  | 167 | 179 | YEEIVKEVSTYIK                     | R | 1,600.85 |
| 3137 | HNRNPA1 Isoform A1-B of Heterogeneous nuclear ribonucleoprotein A1                          | IPI00215965,IPI00465365                                     | 38,828.10  | 167 | 178 | YHTVNGHNCEVR                      | K | 1,485.67 |
| 3138 | CCT3 chaperonin containing TCP1, subunit 3 isoform b                                        | IPI00290770,IPI00553185                                     | 60,446.30  | 167 | 180 | WSSLACNIALDAVK                    | R | 1,547.79 |
| 3139 | AP3S2 AP-3 complex subunit sigma-2                                                          | IPI00025115                                                 | 21,999.80  | 167 | 175 | NINLPEIPR                         | K | 1,065.61 |
| 3140 | VPS28 Vacuolar protein sorting-associated protein 28 homolog                                | IPI00007155,IPI00328913,IPI00795056,IPI00796001             | 25,408.00  | 167 | 177 | MSHLPPDFEGR                       | R | 1,301.59 |

|      |                                                                                                  |                                                  |            |     |     |                         |   |          |
|------|--------------------------------------------------------------------------------------------------|--------------------------------------------------|------------|-----|-----|-------------------------|---|----------|
| 3141 | H2AFY H2A histone family, member Y isoform 2                                                     | IPI00059366,IPI00304171,IPI00744148              | 39,472.70  | 167 | 188 | AASADSTTEGTPADGFTVLST K | S | 2,127.01 |
| 3142 | MTHFD1 C-1-tetrahydrofolate synthase, cytoplasmic                                                | IPI00218342,IPI00794900                          | 101,543.50 | 167 | 173 | HAVVVGR                 | R | 737.4416 |
| 3143 | RPL7 60S ribosomal protein L7                                                                    | IPI00030179,IPI00472171,IPI00871827              | 29,209.70  | 167 | 177 | IALTDNALIAR             | R | 1,170.68 |
| 3144 | PSME3 Isoform 1 of Proteasome activator complex subunit 3                                        | IPI00030243,IPI00219445                          | 29,489.30  | 167 | 181 | TVSEEAASYLDQISR         | R | 1,668.81 |
| 3145 | PLS1 Plastin-1                                                                                   | IPI00032304,IPI00789401                          | 70,338.30  | 168 | 180 | MINLSEPTIDER            | K | 1,548.72 |
| 3146 | NAPA Alpha-soluble NSF attachment protein                                                        | IPI00009253                                      | 33,216.10  | 168 | 180 | VAGYAALLEQYQK           | K | 1,453.77 |
| 3147 | NAPA Alpha-soluble NSF attachment protein                                                        | IPI00009253                                      | 33,216.10  | 168 | 180 | VAGYAALLEQYQK           | K | 1,453.77 |
| 3148 | ARD1A N-terminal acetyltransferase complex ARD1 subunit homolog A                                | IPI00013184                                      | 26,441.00  | 168 | 183 | GRHVVLGAIENKVESK        | K | 1,735.98 |
| 3149 | RPS5 40S ribosomal protein S5                                                                    | IPI00008433                                      | 22,859.00  | 168 | 182 | TIAECLADELINA AK        | K | 1,631.83 |
| 3150 | ZNF384 nuclear matrix transcription factor 4 isoform d                                           | IPI001152875,IPI00220697,IPI00385446,IPI00736968 | 63,199.50  | 168 | 192 | VASTLTEEGGGGGGGGSSVA K  | K | 2,195.11 |
| 3151 | CHST14 Carbohydrate sulfotransferase 14                                                          | IPI00044326                                      | 42,980.00  | 168 | 179 | VLGAVLDSVDVR            | K | 1,242.71 |
| 3152 | BCAP31 B-cell receptor-associated protein 31                                                     | IPI00218200,IPI00642984                          | 27,974.60  | 168 | 182 | LDVGNLAEVKLEEENR        | K | 1,714.86 |
| 3153 | HSD17B12 Estradiol 17-beta-dehydrogenase 12                                                      | IPI00007676                                      | 34,307.40  | 168 | 179 | MTQLVLPGMVER            | K | 1,405.72 |
| 3154 | POR NADPH--cytochrome P450 reductase                                                             | IPI00470467,IPI00792395,IPI00880028,IPI00903331  | 76,672.90  | 168 | 176 | FAVFGLGNK               | K | 952.5251 |
| 3155 | RPA1 Replication protein A 70 kDa DNA-binding subunit                                            | IPI00020127                                      | 68,121.00  | 168 | 183 | AAGPSLSHTSGGTQSK        | K | 1,485.73 |
| 3156 | RNASEH2A Ribonuclease H2 subunit A                                                               | IPI00290192                                      | 33,377.00  | 168 | 183 | ADALYPVVSAA S ICAK      | K | 1,635.84 |
| 3157 | RBM39 Isoform 1 of RNA-binding protein 39                                                        | IPI00163505,IPI00215801                          | 59,363.40  | 168 | 178 | DLEEFFSTVGK             | R | 1,271.62 |
| 3158 | PLS3 plastin 3                                                                                   | IPI00216694                                      | 70,795.90  | 169 | 181 | MINLSVPDIDER            | K | 1,518.75 |
| 3159 | PLS3 plastin 3                                                                                   | IPI00216694                                      | 70,795.90  | 169 | 181 | MINLSVPDIDER            | K | 1,518.75 |
| 3160 | GNB2L1 38 kDa protein                                                                            | IPI00641950,IPI00848226                          | 37,740.10  | 169 | 184 | YTVQDESHSEWVSCVR        | K | 1,981.87 |
| 3161 | HSP90AB1 Heat shock protein HSP 90-beta                                                          | IPI00414676                                      | 83,249.30  | 169 | 177 | ADHGEPIGR               | R | 951.4644 |
| 3162 | RAB18 Ras-related protein Rab-18                                                                 | IPI00014577                                      | 22,959.50  | 169 | 183 | IIQTPGLWESENQNK         | K | 1,756.89 |
| 3163 | MAT2B Isoform 1 of Methionine adenosyltransferase 2 subunit beta                                 | IPI00002324                                      | 37,533.60  | 169 | 181 | AVLENNLGA AVL R         | K | 1,339.77 |
| 3164 | HSP90AA1 heat shock protein 90kDa alpha (cytosolic), class A member 1 isoform 1                  | IPI00382470,IPI00784295                          | 98,147.10  | 169 | 180 | ELISNSSDALDK            | R | 1,291.64 |
| 3165 | DEK Protein DEK                                                                                  | IPI00020021,IPI00871695                          | 42,657.90  | 169 | 178 | SGVNSELVKR              | R | 1,088.61 |
| 3166 | PCNA Proliferating cell nuclear antigen                                                          | IPI00021700                                      | 28,751.30  | 169 | 181 | FSASGELGNGNIK           | K | 1,293.64 |
| 3167 | PCNA Proliferating cell nuclear antigen                                                          | IPI00021700                                      | 28,751.30  | 169 | 181 | FSASGELGNGNIK           | K | 1,293.64 |
| 3168 | SF3A1 Splicing factor 3 subunit 1                                                                | IPI00017451                                      | 88,868.10  | 169 | 176 | LTAQFVAR                | K | 905.5203 |
| 3169 | DNAJC8 DnaJ homolog subfamily C member 8                                                         | IPI00003438                                      | 29,824.20  | 169 | 176 | LFAELEIK                | K | 962.5558 |
| 3170 | PSMA5 Proteasome subunit alpha type-5                                                            | IPI00291922                                      | 26,393.30  | 169 | 187 | AIGSASEGAQSSSLQE VYHK   | R | 1,961.96 |
| 3171 | CAPZB Isoform 2 of F-actin-capping protein subunit beta                                          | IPI00642256                                      | 30,611.70  | 169 | 181 | LTSTVMLWLQTNK           | K | 1,550.82 |
| 3172 | TPI1 Isoform 1 of Triosephosphate isomerase                                                      | IPI00465028                                      | 30,772.80  | 169 | 179 | LDEREAGITEK             | K | 1,260.64 |
| 3173 | NCAPH Condensin complex subunit 2                                                                | IPI00299507                                      | 82,547.10  | 169 | 178 | VDAVHADVYR              | R | 1,144.57 |
| 3174 | HSP90AA1 heat shock protein 90kDa alpha (cytosolic), class A member 1 isoform 1                  | IPI00382470,IPI00784295                          | 98,147.10  | 169 | 182 | ELISNSSDALDKIR          | R | 1,560.82 |
| 3175 | CNBP Isoform 1 of Cellular nucleic acid-binding protein                                          | IPI00430812,IPI00430813,IPI00430814              | 19,444.10  | 170 | 177 | ECTIEATA                | R | 894.3874 |
| 3176 | ARD1A N-terminal acetyltransferase complex ARD1 subunit homolog A                                | IPI00013184                                      | 26,441.00  | 170 | 183 | HVVLGAIENKVESK          | R | 1,522.86 |
| 3177 | UBE2S Ubiquitin-conjugating enzyme E2 S                                                          | IPI00217949                                      | 23,828.40  | 170 | 198 | ALASGTEASSTDPGAPGGPG R  | R | 2,585.22 |
| 3178 | KHDRBS1 Isoform 1 of KH domain-containing, RNA-binding, signal transduction-associated protein 1 | IPI00008575,IPI00385834,IPI00479209              | 48,210.20  | 170 | 175 | GAEGPMAKK FNFVGK        | K | 711.3824 |
| 3179 | UBE2S Ubiquitin-conjugating enzyme E2 S                                                          | IPI00217949                                      | 23,828.40  | 170 | 197 | ALASGTEASSTDPGAPGGPG R  | R | 2,457.12 |
| 3180 | DNAJB1 DnaJ homolog subfamily B member 1                                                         | IPI00015947                                      | 38,027.60  | 170 | 181 | GAEGPMAK VSLEEIYSGCTK   | R | 1,385.66 |
| 3181 | TRMT1 Isoform 1 of N(2),N(2)-dimethylguanosine tRNA methyltransferase                            | IPI00020508,IPI00178861                          | 72,215.30  | 170 | 178 | FALEVPGLR               | R | 1,001.58 |



|      |                                                                         |                                                             |            |     |     |                                              |   |   |          |
|------|-------------------------------------------------------------------------|-------------------------------------------------------------|------------|-----|-----|----------------------------------------------|---|---|----------|
| 3182 | COX4NB Neighbor of COX4                                                 | IPI00005740                                                 | 23,754.90  | 170 | 178 | ISASLLDSR                                    | R | S | 961.5313 |
| 3183 | RAB6A Isoform 1 of Ras-related protein Rab-6A                           | IPI00023526,IPI00217943                                     | 23,575.30  | 170 | 183 | VAAALPGMESTQDR                               | R | S | 1,461.70 |
| 3184 | EIF2A Isoform 1 of Eukaryotic translation initiation factor 2A          | IPI00902564                                                 | 64,973.20  | 170 | 183 | INDFVLSPPGPQPYK                              | K | V | 1,574.82 |
| 3185 | CDK2 Cell division protein kinase 2                                     | IPI00031681                                                 | 33,912.70  | 170 | 178 | APELLGCK                                     | R | Y | 1,000.55 |
| 3186 | TPD52 tumor protein D52 isoform 2                                       | IPI00619951,IPI00619958,IPI00873344,IPI00896474             | 22,459.40  | 171 | 207 | VGGTKPAGGDFGEVLNSAAN K<br>ASATTTTEPLPEKTQESL | K | - | 3,644.79 |
| 3187 | RPS8 40S ribosomal protein S8                                           | IPI00216587,IPI00872430                                     | 24,188.40  | 171 | 184 | LLACIASRPGQCGR                               | K | A | 1,558.79 |
| 3188 | RPS8 40S ribosomal protein S8                                           | IPI00216587,IPI00872430                                     | 24,188.40  | 171 | 184 | LLACIASRPGQCGR                               | K | A | 1,558.79 |
| 3189 | PRDX3 Thioredoxin-dependent peroxide reductase, mitochondrial           | IPI00024919,IPI00374151                                     | 27,674.70  | 171 | 184 | DYGVLLGSLALR                                 | R | G | 1,462.79 |
| 3190 | RNPS1 Isoform 1 of RNA-binding protein with serine-rich domain 1        | IPI00033561,IPI00479871,IPI00783594                         | 34,191.60  | 171 | 186 | NVTKDHIMEIFSTYGK                             | R | I | 1,882.94 |
| 3191 | CCDC124 Coiled-coil domain-containing protein 124                       | IPI00060627                                                 | 25,817.70  | 171 | 183 | AAFTAFEEAQLPR                                | R | L | 1,450.73 |
| 3192 | CCDC124 Coiled-coil domain-containing protein 124                       | IPI00060627                                                 | 25,817.70  | 171 | 183 | AAFTAFEEAQLPR                                | R | L | 1,450.73 |
| 3193 | C16orf80 UPF0468 protein C16orf80                                       | IPI00001655                                                 | 22,757.60  | 171 | 182 | LYSEDELPAEFK                                 | R | L | 1,440.69 |
| 3194 | VIM Vimentin                                                            | IPI00418471                                                 | 53,634.60  | 171 | 184 | VEVERDNLAEDIMR                               | R | L | 1,704.82 |
| 3195 | MDH1 Malate dehydrogenase, cytoplasmic                                  | IPI00291005,IPI00915869                                     | 36,408.90  | 171 | 179 | LGVTANDVK                                    | K | N | 916.5099 |
| 3196 | MDH1 Malate dehydrogenase, cytoplasmic                                  | IPI00291005,IPI00915869                                     | 36,408.90  | 171 | 179 | LGVTANDVK                                    | K | N | 916.5099 |
| 3197 | DFFA Isoform DFF45 of DNA fragmentation factor subunit alpha (Fragment) | IPI00010882                                                 | 36,504.50  | 171 | 186 | LQHTLQQVLDQREEVR                             | R | Q | 1,992.06 |
| 3198 | PRC1 Isoform 1 of Protein regulator of cytokinesis 1                    | IPI00022629,IPI00399304,IPI00748507,IPI00871281,IPI00915034 | 71,589.90  | 171 | 179 | REEFVSIKR                                    | R | Q | 1,163.65 |
| 3199 | HNRPDL Isoform 1 of Heterogeneous nuclear ribonucleoprotein D-like      | IPI00011274,IPI00045498,IPI00845282                         | 46,420.60  | 171 | 180 | FGEVVDCTIK                                   | R | T | 1,167.57 |
| 3200 | HNRPDL Isoform 1 of Heterogeneous nuclear ribonucleoprotein D-like      | IPI00011274,IPI00045498,IPI00845282                         | 46,420.60  | 171 | 180 | FGEVVDCTIK                                   | R | T | 1,167.57 |
| 3201 | PGM1 Isoform 2 of Phosphoglucomutase-1                                  | IPI00217872,IPI00219526,IPI00844159                         | 63,775.10  | 171 | 182 | TIEEYAVCPDLK                                 | K | V | 1,437.69 |
| 3202 | CBX3;LOC653972 Chromobox protein homolog 3                              | IPI00297579                                                 | 20,794.00  | 172 | 183 | LTWHSCPEDEAQ                                 | R | - | 1,472.61 |
| 3203 | BTF3 Isoform 1 of Transcription factor BTF3                             | IPI00221035                                                 | 22,150.30  | 172 | 206 | QSVGDKAPLATGEDDDDEVP K<br>DLVENFDEASKNEAN    | K | - | 3,733.65 |
| 3204 | GIN5 DNA replication complex GINS protein PSF2                          | IPI00007146                                                 | 21,410.80  | 172 | 185 | TNLQPLESTQSQDF                               | R | - | 1,607.75 |
| 3205 | PGK1 Phosphoglycerate kinase 1                                          | IPI00169383                                                 | 44,597.30  | 172 | 184 | AHSSMVGVNLPQK                                | R | A | 1,383.71 |
| 3206 | QPRT Nicotinate-nucleotide pyrophosphorylase [carboxylating]            | IPI00300086,IPI00872692                                     | 30,797.30  | 172 | 183 | DNHVVAAGGVEK                                 | K | A | 1,195.61 |
| 3207 | MLF2 Myeloid leukemia factor 2                                          | IPI00023095                                                 | 28,129.90  | 172 | 198 | TGDQEERQDYINLDESEAAA R<br>FDDEWRR            | R | E | 3,258.42 |
| 3208 | TAGLN2 Transgelin-2                                                     | IPI00550363                                                 | 22,373.90  | 172 | 182 | NVIGLQMG TNR                                 | K | G | 1,218.63 |
| 3209 | ETF1 Eukaryotic peptide chain release factor subunit 1                  | IPI00429191                                                 | 49,014.60  | 172 | 179 | FTVDLPKK                                     | K | H | 947.5562 |
| 3210 | FEN1 Flap endonuclease 1                                                | IPI00026215                                                 | 42,576.20  | 172 | 192 | VYAAATEDMDCLTFGSPVLM R                       | K | H | 2,363.07 |
| 3211 | RDH11 Isoform 1 of Retinol dehydrogenase 11                             | IPI00339384                                                 | 35,368.50  | 172 | 184 | IVNVSSLAHHLGR                                | R | I | 1,402.79 |
| 3212 | ATP5A1 ATP synthase subunit alpha, mitochondrial                        | IPI00440493                                                 | 59,734.10  | 172 | 182 | VGLKAPGIIPR                                  | R | I | 1,120.72 |
| 3213 | HSPA8 Isoform 1 of Heat shock cognate 71 kDa protein                    | IPI00003865                                                 | 70,881.80  | 172 | 187 | IINEPTAAAIYGLDK                              | R | K | 1,659.90 |
| 3214 | LMNA Isoform A of Lamin-A/C                                             | IPI00021405                                                 | 74,122.60  | 172 | 180 | LEAALGEAK                                    | K | K | 901.499  |
| 3215 | RAB7A Ras-related protein Rab-7a                                        | IPI00016342                                                 | 23,472.00  | 172 | 191 | NALKQETEVLYNEFPEPIK                          | R | L | 2,391.21 |
| 3216 | PDE12 Isoform 1 of 2',5'-phosphodiesterase 12                           | IPI00174390,IPI00886797                                     | 67,333.70  | 172 | 182 | YIMAGFPVCPK                                  | R | L | 1,282.63 |
| 3217 | SEPT9 septin 9 isoform a                                                | IPI00784614,IPI00784808,IPI00784936                         | 65,384.30  | 172 | 186 | VPEVPTAPATDAAPK                              | K | R | 1,463.77 |
| 3218 | HNRNPA0 Heterogeneous nuclear ribonucleoprotein A0                      | IPI00011913                                                 | 30,822.50  | 172 | 189 | KAVPKEDIYSGGGGGGSR                           | K | S | 1,734.88 |
| 3219 | KIAA1524 Isoform 1 of Protein CIP2A                                     | IPI00154283                                                 | 102,171.30 | 172 | 181 | HNLVSVQTHIK                                  | R | T | 1,176.65 |
| 3220 | HSPA1A;HSPA1B Heat shock 70 kDa protein 1                               | IPI00304925                                                 | 70,036.00  | 172 | 187 | IINEPTAAAIYGLDR                              | R | T | 1,687.90 |
| 3221 | HSPA1A;HSPA1B Heat shock 70 kDa protein 1                               | IPI00304925                                                 | 70,036.00  | 172 | 187 | IINEPTAAAIYGLDR                              | R | T | 1,687.90 |

|      |                                                                              |                                     |            |     |     |                           |   |   |          |
|------|------------------------------------------------------------------------------|-------------------------------------|------------|-----|-----|---------------------------|---|---|----------|
| 3222 | HSPA1A;HSPA1B Heat shock 70 kDa protein 1                                    | IPI00304925                         | 70,036.00  | 172 | 187 | IINEPTAAAIAYGLDR          | R | T | 1,687.90 |
| 3223 | HSPA1A;HSPA1B Heat shock 70 kDa protein 1                                    | IPI00304925                         | 70,036.00  | 172 | 187 | IINEPTAAAIAYGLDR          | R | T | 1,687.90 |
| 3224 | HSPA1A;HSPA1B Heat shock 70 kDa protein 1                                    | IPI00304925                         | 70,036.00  | 172 | 187 | IINEPTAAAIAYGLDR          | R | T | 1,687.90 |
| 3225 | HSPA1A;HSPA1B Heat shock 70 kDa protein 1                                    | IPI00304925                         | 70,036.00  | 172 | 187 | IINEPTAAAIAYGLDR          | R | T | 1,687.90 |
| 3226 | HSPA8 Isoform 1 of Heat shock cognate 71 kDa protein                         | IPI00003865                         | 70,881.80  | 172 | 188 | IINEPTAAAIAYGLDKK         | R | V | 1,787.99 |
| 3227 | TMCO1 Isoform 1 of Transmembrane and coiled-coil domain-containing protein 1 | IPI00026111,IPI00761107             | 21,158.30  | 173 | 186 | QAGGFLGPPPPSGK            | K | F | 1,309.69 |
| 3228 | MAP2K2 Dual specificity mitogen-activated protein kinase kinase 2            | IPI00003783                         | 44,407.20  | 173 | 179 | VSIIVLR                   | K | G | 757.493  |
| 3229 | RAB1B Ras-related protein Rab-1B                                             | IPI00008964,IPI00896425             | 22,154.00  | 173 | 187 | MGPGAASGGGERPNLK          | R | I | 1,441.72 |
| 3230 | ATAD1 ATPase family AAA domain-containing protein 1                          | IPI00171445,IPI00910210             | 40,727.10  | 173 | 183 | LAAAVFSLAIK               | K | L | 1,103.68 |
| 3231 | HNRNPA0 Heterogeneous nuclear ribonucleoprotein A0                           | IPI00011913                         | 30,822.50  | 173 | 189 | AVPKEDIYSGGGGGGSR         | K | S | 1,606.78 |
| 3232 | HNRNPA0 Heterogeneous nuclear ribonucleoprotein A0                           | IPI00011913                         | 30,822.50  | 173 | 189 | AVPKEDIYSGGGGGGSR         | K | S | 1,606.78 |
| 3233 | XPO1 Exportin-1                                                              | IPI00298961,IPI00893013             | 123,370.90 | 173 | 190 | LLSEEVDFSSGQITQVK         | K | S | 2,027.03 |
| 3234 | NOSIP Nitric oxide synthase-interacting protein                              | IPI00006408                         | 33,154.00  | 173 | 181 | ATKLEKPSR                 | K | T | 1,029.61 |
| 3235 | YKT6 Synaptobrevin homolog YKT6                                              | IPI00008569                         | 22,399.80  | 174 | 182 | SEVLGTQSK                 | K | A | 948.4997 |
| 3236 | DDI2 Isoform 3 of Protein DDI1 homolog 2                                     | IPI00031618,IPI00796836,IPI00845258 | 46,553.90  | 174 | 182 | VLVEQQQDR                 | R | A | 1,114.59 |
| 3237 | TRAPP5 Trafficking protein particle complex subunit 5                        | IPI00177509                         | 20,765.40  | 174 | 181 | FEEAVIAR                  | K | D | 934.4992 |
| 3238 | PRDX4 Peroxiredoxin-4                                                        | IPI00011937,IPI00639945             | 30,523.10  | 174 | 186 | IPLLSDLTHQISK             | R | D | 1,464.84 |
| 3239 | HNRNPA2B1 43 kDa protein                                                     | IPI00874030                         | 43,234.30  | 174 | 190 | KLFVGGIKEDTEEHHLR         | K | D | 2,008.06 |
| 3240 | HNRNPA2B1 43 kDa protein                                                     | IPI00874030                         | 43,234.30  | 174 | 181 | KLFVGGIK                  | K | E | 861.5558 |
| 3241 | ST13 Hsc70-interacting protein                                               | IPI00032826                         | 41,314.40  | 174 | 188 | AIEINPDSAQPYKWR           | R | G | 1,787.91 |
| 3242 | - cDNA FLJ54554, highly similar to Pyruvate kinase isozymes M1/M2            | IPI00910979                         | 56,255.30  | 174 | 191 | GADFLVTEVENGGSLGSK        | K | K | 1,779.88 |
| 3243 | GPATCH4 Isoform 1 of G patch domain-containing protein 4                     | IPI00829835                         | 50,363.50  | 174 | 184 | LEAQEQAFRLAR              | R | L | 1,275.67 |
| 3244 | PKM2 Isoform M1 of Pyruvate kinase isozymes M1/M2                            | IPI00220644,IPI00479186             | 58,044.60  | 174 | 186 | IYVDDGLISLQVK             | K | Q | 1,462.82 |
| 3245 | CROP Isoform 1 of Cisplatin resistance-associated overexpressed protein      | IPI00107745                         | 51,449.10  | 174 | 187 | STTSTIESFAAQEK            | R | Q | 1,499.72 |
| 3246 | RNH1 Ribonuclease inhibitor                                                  | IPI00550069                         | 49,956.40  | 174 | 188 | ELTVSNNNDINEAGVR          | K | V | 1,630.80 |
| 3247 | RRM1 Ribonucleoside-diphosphate reductase large subunit                      | IPI00013871                         | 90,055.50  | 174 | 196 | VSVGIIHKEDIDAAIETYNLLSE R | R | W | 2,572.33 |
| 3248 | RPL9 60S ribosomal protein L9                                                | IPI00031691                         | 21,845.70  | 175 | 192 | FLDGIYVSEKGTVQQADE        | K | - | 1,998.97 |
| 3249 | SGTA Small glutamine-rich tetratricopeptide repeat-containing protein alpha  | IPI00013949                         | 34,045.90  | 175 | 184 | HVEAVAYYKK                | K | A | 1,207.65 |
| 3250 | SEPT2 Septin-2                                                               | IPI00014177,IPI00871851,IPI00894340 | 41,470.10  | 175 | 183 | VNIVPVIK                  | K | A | 952.619  |
| 3251 | BUB3 Mitotic checkpoint protein BUB3                                         | IPI00013468,IPI00514701,IPI00644108 | 37,136.70  | 175 | 183 | ESSLKYQTR                 | R | C | 1,111.57 |
| 3252 | HNRNPA2B1 43 kDa protein                                                     | IPI00874030                         | 43,234.30  | 175 | 190 | LFVGGIKEDTEEHHLR          | K | D | 1,879.97 |
| 3253 | HNRNPC Isoform C1 of Heterogeneous nuclear ribonucleoproteins C1/C2          | IPI00216592,IPI00477313,IPI00909232 | 32,320.00  | 175 | 185 | LKGDDLQAIKK               | K | E | 1,228.73 |
| 3254 | HNRNPC Isoform C1 of Heterogeneous nuclear ribonucleoproteins C1/C2          | IPI00216592,IPI00477313,IPI00909232 | 32,320.00  | 175 | 185 | LKGDDLQAIKK               | K | E | 1,228.73 |
| 3255 | ELAVL1 cDNA FLJ60076, highly similar to ELAV-like protein 1                  | IPI00301936                         | 38,979.00  | 175 | 180 | GVAFIR                    | R | F | 662.3984 |
| 3256 | RHOG Rho-related GTP-binding protein RhoG                                    | IPI00017342                         | 21,290.10  | 175 | 184 | AVLNPTPIKR                | R | G | 1,108.68 |
| 3257 | RPL9 60S ribosomal protein L9                                                | IPI00031691                         | 21,845.70  | 175 | 184 | FLDGIYVSEK                | K | G | 1,170.60 |
| 3258 | HNRNPH3 Isoform 1 of Heterogeneous nuclear ribonucleoprotein H3              | IPI00013877,IPI00216492             | 36,909.60  | 175 | 200 | GMGGHGYGGAGDASSGFHG R     | R | G | 2,575.07 |
| 3259 | UBA1 Ubiquitin-like modifier-activating enzyme 1                             | IPI00645078                         | 117,832.30 | 175 | 182 | VGEFCHNR                  | R | G | 1,018.45 |
| 3260 | PSMA1 Isoform Short of Proteasome subunit alpha type-1                       | IPI00016832,IPI00472442             | 29,538.00  | 175 | 189 | HMSEFMECNLNLVVK           | R | H | 1,912.82 |



|      |                                                                                                  |                                                 |            |     |     |                              |   |   |          |
|------|--------------------------------------------------------------------------------------------------|-------------------------------------------------|------------|-----|-----|------------------------------|---|---|----------|
| 3261 | ATP2A2 Isoform SERCA2A of Sarcoplasmic/endoplasmic reticulum calcium ATPase 2                    | IPI00177817,IPI00219078,IPI00747443             | 109,674.90 | 175 | 189 | VDQSILTGESVSVIK              | R | H | 1,574.86 |
| 3262 | MAPRE1 Microtubule-associated protein RP/EB family member 1                                      | IPI00017596,IPI00910350                         | 29,981.50  | 175 | 181 | AGPGVVR                      | K | K | 655.3886 |
| 3263 | ILF2 Interleukin enhancer-binding factor 2                                                       | IPI00005198,IPI00872107                         | 43,044.70  | 175 | 185 | ILITVPPNLR                   | K | K | 1,236.77 |
| 3264 | RPS3A 40S ribosomal protein S3a                                                                  | IPI00419880,IPI00472119                         | 29,927.30  | 175 | 187 | EVQTNLDKEVVNK                | R | L | 1,515.80 |
| 3265 | ETFB Isoform 1 of Electron transfer flavoprotein subunit beta                                    | IPI00004902,IPI00556451                         | 27,825.50  | 175 | 186 | LKLPAVVTADLR                 | R | L | 1,295.80 |
| 3266 | PSMA7 Isoform 1 of Proteasome subunit alpha type-7                                               | IPI00024175                                     | 27,869.10  | 175 | 189 | NYTDEAIETDDLTIK              | K | L | 1,740.82 |
| 3267 | NAMPT Isoform 1 of Nicotinamide phosphoribosyltransferase                                        | IPI00018873                                     | 55,504.50  | 175 | 189 | YLLETSGNLDGLEYSK             | K | L | 1,714.85 |
| 3268 | RAC1 Isoform A of Ras-related C3 botulinum toxin substrate 1                                     | IPI00010271,IPI00219675                         | 21,432.60  | 175 | 184 | AVLCPPPVKK                   | R | R | 1,108.65 |
| 3269 | AHCY Adenosylhomocysteinase                                                                      | IPI00012007                                     | 47,699.10  | 175 | 186 | VPAINVNDSVTK                 | K | S | 1,256.68 |
| 3270 | EIF4E2 Eukaryotic translation initiation factor 4E type 2                                        | IPI00744211,IPI00915774                         | 28,344.70  | 175 | 185 | FQEDIISIWNK                  | R | T | 1,392.72 |
| 3271 | VDAC3 Isoform 1 of Voltage-dependent anion-selective channel protein 3                           | IPI00031804,IPI00294779                         | 30,641.90  | 175 | 197 | AADFQLHTHVNDGTEFGGSI         | K | V | 2,535.19 |
| 3272 | VDAC1 Voltage-dependent anion-selective channel protein 1                                        | IPI00216308                                     | 30,755.90  | 175 | 197 | YQK<br>TDEFQLHTNVNDGTEFGGSIY | K | V | 2,600.19 |
| 3273 | CCT4 T-complex protein 1 subunit delta                                                           | IPI00302927,IPI00873222                         | 57,907.90  | 175 | 193 | QK<br>VVSQYSSLLSPMSVNAVMMK   | K | V | 2,072.04 |
| 3274 | DCTN5 Dynactin subunit 5                                                                         | IPI00032498                                     | 20,108.10  | 176 | 182 | FLPLTQV                      | K | - | 817.4819 |
| 3275 | SEPT11 Septin-11                                                                                 | IPI00019376                                     | 49,381.10  | 176 | 184 | VNIIPPIAK                    | K | A | 980.6504 |
| 3276 | TOMM40 Isoform 1 of Mitochondrial import receptor subunit TOM40 homolog                          | IPI00014053                                     | 37,875.10  | 176 | 184 | MAIQTQQSK                    | K | F | 1,050.53 |
| 3277 | RPL7A 60S ribosomal protein L7a                                                                  | IPI00299573                                     | 29,978.30  | 176 | 185 | KMGVPYCIK                    | R | G | 1,208.65 |
| 3278 | KHDRBS1 Isoform 1 of KH domain-containing, RNA-binding, signal transduction-associated protein 1 | IPI00008575,IPI00385834,IPI00479209             | 48,210.20  | 176 | 186 | ILGPQGNTIKR                  | K | L | 1,196.71 |
| 3279 | RPL10 60S ribosomal protein L10                                                                  | IPI00554723,IPI00646899,IPI00853161             | 24,586.60  | 176 | 188 | FNADEFEDMVAEK                | K | R | 1,544.66 |
| 3280 | KHDRBS1 Isoform 1 of KH domain-containing, RNA-binding, signal transduction-associated protein 1 | IPI00008575,IPI00385834,IPI00479209             | 48,210.20  | 176 | 185 | ILGPQGNTIK                   | K | R | 1,040.61 |
| 3281 | RAB1A Isoform 1 of Ras-related protein Rab-1A                                                    | IPI00005719,IPI00873902                         | 22,660.40  | 176 | 187 | MGPATAGGAEK                  | R | S | 1,062.49 |
| 3282 | TBCB Tubulin folding cofactor B                                                                  | IPI00293126                                     | 27,307.50  | 176 | 196 | RGTVMYVGLTDFKPGYWIGV<br>R    | R | Y | 2,431.26 |
| 3283 | NSDHL Sterol-4-alpha-carboxylate 3-dehydrogenase, decarboxylating                                | IPI00019407,IPI00646262                         | 41,882.80  | 177 | 181 | ILQER                        | K | A | 658.3883 |
| 3284 | PRPS1 Ribose-phosphate pyrophosphokinase 1                                                       | IPI00219616,IPI00917169                         | 34,816.70  | 177 | 194 | RVTSIADRLNVDFALIK            | K | E | 2,068.17 |
| 3285 | EIF3I Eukaryotic translation initiation factor 3 subunit I                                       | IPI00012795                                     | 36,484.00  | 177 | 185 | SGEVLNVK                     | K | E | 944.5411 |
| 3286 | NARG1 Isoform 1 of NMDA receptor-regulated protein 1                                             | IPI00386189                                     | 101,259.90 | 177 | 201 | TQQTSPDKVDYESELLLYQN         | K | E | 3,030.51 |
| 3287 | MDH2 Malate dehydrogenase, mitochondrial                                                         | IPI00291006                                     | 35,485.70  | 177 | 185 | QVLR<br>ANTFVAELK            | R | G | 992.5411 |
| 3288 | NONO Non-POU domain-containing octamer-binding protein                                           | IPI00304596                                     | 54,213.60  | 177 | 184 | AVVIVDDR                     | R | G | 886.4993 |
| 3289 | NONO Non-POU domain-containing octamer-binding protein                                           | IPI00304596                                     | 54,213.60  | 177 | 184 | AVVIVDDR                     | R | G | 886.4993 |
| 3290 | CACYBP Isoform 1 of Calcyclin-binding protein                                                    | IPI00395627                                     | 26,192.30  | 177 | 197 | EKPSYDTETDPSEGLMNVLK         | K | I | 2,397.15 |
| 3291 | RAB8A Ras-related protein Rab-8A                                                                 | IPI00028481                                     | 23,651.60  | 177 | 190 | K<br>LEGNSPQGSNQGK           | K | I | 1,414.69 |
| 3292 | RSL1D1 Ribosomal L1 domain-containing protein 1                                                  | IPI00008708,IPI00642046                         | 54,956.70  | 177 | 188 | KKVPVSVNLLSK                 | R | N | 1,311.84 |
| 3293 | BRD2 Isoform 1 of Bromodomain-containing protein 2                                               | IPI00014414,IPI00797929,IPI00893088,IPI00893622 | 88,045.30  | 177 | 193 | VASMPQEEQELVVTIPK            | K | N | 1,913.99 |
| 3294 | EIF3I Eukaryotic translation initiation factor 3 subunit I                                       | IPI00012795                                     | 36,484.00  | 177 | 189 | SGEVLNVKHEHSR                | K | Q | 1,453.78 |
| 3295 | HNRNPA0 Heterogeneous nuclear ribonucleoprotein A0                                               | IPI00011913                                     | 30,822.50  | 177 | 189 | EDIYSGGGGGGSR                | K | S | 1,211.53 |

|      |                                                                                 |                                                             |            |     |     |                                               |   |   |          |
|------|---------------------------------------------------------------------------------|-------------------------------------------------------------|------------|-----|-----|-----------------------------------------------|---|---|----------|
| 3296 | SEH1L Isoform A of Nucleoporin SEH1-like                                        | UPI00185533,UPI00220609                                     | 39,630.00  | 177 | 196 | AHSPMIAVGSDDSSPNAMAK                          | R | V | 2,017.90 |
| 3297 | CDC2 Putative uncharacterized protein<br>DKFZp686L20222                         | UPI00026689                                                 | 34,762.10  | 177 | 186 | SPEVLLGSAR                                    | R | Y | 1,028.57 |
| 3298 | CDC2 Putative uncharacterized protein<br>DKFZp686L20222                         | UPI00026689                                                 | 34,762.10  | 177 | 186 | SPEVLLGSAR                                    | R | Y | 1,028.57 |
| 3299 | BTF3 Isoform 1 of Transcription factor BTF3                                     | UPI00221035                                                 | 22,150.30  | 178 | 206 | APLATGEDDDDEVPLVNF<br>DEASKNEAN<br>YKFEVYEKND | K | - | 3,119.35 |
| 3300 | DHFR Dihydrofolate reductase                                                    | UPI00030357,UPI00887771                                     | 21,435.30  | 178 | 187 | YKFEVYEKND                                    | K | - | 1,334.63 |
| 3301 | DDX5 Probable ATP-dependent RNA helicase<br>DDX5                                | UPI00017617                                                 | 69,131.70  | 178 | 192 | ELAQQVQQVAAEYCR                               | R | A | 1,792.86 |
| 3302 | DDX5 Probable ATP-dependent RNA helicase<br>DDX5                                | UPI00017617                                                 | 69,131.70  | 178 | 192 | ELAQQVQQVAAEYCR                               | R | A | 1,792.86 |
| 3303 | DDX5 Probable ATP-dependent RNA helicase<br>DDX5                                | UPI00017617                                                 | 69,131.70  | 178 | 192 | ELAQQVQQVAAEYCR                               | R | A | 1,792.86 |
| 3304 | UGDH UDP-glucose 6-dehydrogenase                                                | UPI00031420                                                 | 55,007.30  | 178 | 190 | VLIGGDETPEGQR                                 | R | A | 1,370.69 |
| 3305 | PCBP1 Poly(rC)-binding protein 1                                                | UPI00016610                                                 | 37,480.20  | 178 | 200 | VMTIPYQMPASSPVICAGGQ<br>DR                    | R | C | 2,507.17 |
| 3306 | NUDCD3 NudC domain-containing protein 3                                         | UPI00238209                                                 | 40,803.60  | 178 | 187 | NPDSYNGAVR                                    | K | E | 1,092.51 |
| 3307 | EIF4A1 Eukaryotic initiation factor 4A-I                                        | UPI00025491,UPI00871852                                     | 46,137.30  | 178 | 190 | MFVLDEADEMLSR                                 | K | G | 1,587.70 |
| 3308 | ATP1A1 Isoform Long of Sodium/potassium-<br>transporting ATPase subunit alpha-1 | UPI00006482,UPI00646182                                     | 112,881.50 | 178 | 194 | MSINAEVSVVGDLEVK                              | K | G | 1,846.95 |
| 3309 | ATP1B3 Sodium/potassium-transporting ATPase<br>subunit beta-3                   | UPI00008167                                                 | 31,495.70  | 178 | 188 | IIGLKPEGVPR                                   | R | I | 1,178.73 |
| 3310 | ATP1B3 Sodium/potassium-transporting ATPase<br>subunit beta-3                   | UPI00008167                                                 | 31,495.70  | 178 | 188 | IIGLKPEGVPR                                   | R | I | 1,178.73 |
| 3311 | THOC6 Isoform 1 of THO complex subunit 6<br>homoloq                             | UPI00328985,UPI00641826                                     | 37,517.00  | 178 | 193 | ERSPEVLGGEDGAVR                               | R | L | 1,657.81 |
| 3312 | LY6G5B;CSNK2B Casein kinase II subunit beta                                     | UPI00010865,UPI00640088                                     | 24,924.90  | 178 | 186 | RPANQFVPR                                     | K | L | 1,084.60 |
| 3313 | ASRGL1 Isoform 1 of L-asparaginase                                              | UPI00555734                                                 | 32,036.10  | 178 | 192 | GNVAYATSTGGIVNK                               | K | M | 1,451.75 |
| 3314 | KHSRP KH-type splicing regulatory protein                                       | UPI00479786,UPI00855957                                     | 73,097.60  | 178 | 190 | VQISPDSGGLPER                                 | K | S | 1,354.70 |
| 3315 | JUP Junction plakoglobin                                                        | UPI00554711                                                 | 81,727.90  | 178 | 191 | ALMGSPQLVAAVVR                                | R | T | 1,427.80 |
| 3316 | SFRS6 Isoform SRP55-1 of Splicing factor,<br>arginine/serine-rich 6             | UPI00012345,UPI00215879,UPI00556297                         | 39,570.40  | 178 | 184 | LIEDKPR                                       | R | T | 870.5045 |
| 3317 | TRMT1 Isoform 1 of N(2),N(2)-dimethylguanosine<br>tRNA methyltransferase        | UPI00020508,UPI00178861                                     | 72,215.30  | 179 | 188 | SVVANDASTR                                    | R | A | 1,019.51 |
| 3318 | UCHL1 Ubiquitin carboxyl-terminal hydrolase<br>isozyme L1                       | UPI00018352                                                 | 24,806.30  | 179 | 195 | MPFPVNHGASSEDLLK                              | R | D | 1,842.91 |
| 3319 | MGMT O-6-methylguanine-DNA methyltransferase                                    | UPI00028618                                                 | 25,031.90  | 179 | 196 | VVCSSGAVGNYSGLAVK                             | R | E | 1,724.86 |
| 3320 | EIF4A2 Isoform 1 of Eukaryotic initiation factor 4A-II                          | UPI00328328,UPI00409717                                     | 46,385.60  | 179 | 191 | MFVLDEADEMLSR                                 | K | G | 1,587.70 |
| 3321 | BZW1 Isoform 2 of Basic leucine zipper and W2<br>domain-containing protein 1    | UPI00180128,UPI00785096,UPI00916112,UPI00916503,UPI00918019 | 40,522.00  | 179 | 188 | EGVSAAFAVK                                    | K | L | 978.5254 |
| 3322 | SERPINB6 Putative uncharacterized protein<br>DKFZp686I04222                     | UPI00413451,UPI00749398                                     | 46,353.40  | 179 | 193 | IAELSPGSDVPLTR                                | K | L | 1,567.87 |
| 3323 | RAB35 Ras-related protein Rab-35                                                | UPI00300096                                                 | 23,007.20  | 179 | 189 | QQQQQQNDVVK                                   | K | L | 1,342.67 |
| 3324 | TOR1AIP1 Putative uncharacterized protein<br>TOR1AIP1                           | UPI00792065                                                 | 66,301.60  | 179 | 193 | SIQEAPAVSEDLVIR                               | R | L | 1,626.87 |
| 3325 | QTRTD1 48 kDa protein                                                           | UPI00074010,UPI00783033                                     | 48,185.80  | 179 | 188 | SLFLDNCLR                                     | R | L | 1,250.66 |
| 3326 | UFD1L Isoform Short of Ubiquitin fusion<br>degradation protein 1 homoloq        | UPI00218292,UPI00655754,UPI00873326                         | 34,483.20  | 179 | 202 | AVSIECDMNVDFDAPLGYKE<br>PER                   | K | Q | 2,768.29 |
| 3327 | IGF2BP1 Insulin-like growth factor 2 mRNA-binding<br>protein 1                  | UPI00008557                                                 | 63,438.30  | 179 | 190 | QGSPVAAGAPAK                                  | R | Q | 1,053.57 |
| 3328 | HNRNPL Heterogeneous nuclear ribonucleoprotein<br>L                             | UPI00027834                                                 | 64,114.80  | 179 | 189 | ISRPGSDDSR                                    | K | S | 1,204.56 |
| 3329 | UCHL1 Ubiquitin carboxyl-terminal hydrolase<br>isozyme L1                       | UPI00018352                                                 | 24,806.30  | 179 | 199 | MPFPVNHGASSEDLLKDAA<br>K                      | R | V | 2,228.10 |
| 3330 | PEBP1 Phosphatidylethanolamine-binding protein 1                                | UPI00219446                                                 | 21,038.90  | 180 | 187 | LYEQLSGK                                      | K | - | 937.499  |
| 3331 | HNRNPA1 Isoform A1-B of Heterogeneous nuclear<br>ribonucleoprotein A1           | UPI00215965,UPI00465365                                     | 38,828.10  | 180 | 194 | ALSKQEMASASSSQR                               | K | G | 1,596.76 |
| 3332 | SNRPA1 U2 small nuclear ribonucleoprotein A'                                    | UPI00297477                                                 | 28,399.10  | 180 | 191 | TFNPGAGLPTDK                                  | K | K | 1,217.62 |

|      |                                                                                                  |                                                 |           |     |     |                                   |   |   |          |
|------|--------------------------------------------------------------------------------------------------|-------------------------------------------------|-----------|-----|-----|-----------------------------------|---|---|----------|
| 3333 | THOC6 Isoform 1 of THO complex subunit 6 homolog                                                 | IPI00328985,IPI00641826                         | 37,517.00 | 180 | 193 | SPEVLSSGGEDGAVR                   | R | L | 1,372.67 |
| 3334 | TMUB2 Isoform 1 of Transmembrane and ubiquitin-like domain-containing protein 2                  | IPI00743888,IPI00760551,IPI00909916             | 33,769.90 | 180 | 200 | FLNDTEELAVARPEDTVGALK             | K | S | 2,288.18 |
| 3335 | PFKM cDNA FLJ44241 fis, clone THYMU3008436, highly similar to 6-phosphofructokinase, muscle type | IPI00465179,IPI00743142                         | 93,203.30 | 180 | 200 | GITNLCVIGGDGSLTGADTFR             | R | S | 2,124.04 |
| 3336 | HNRNPH1 Heterogeneous nuclear ribonucleoprotein H                                                | IPI00013881,IPI00479191                         | 49,211.80 | 180 | 185 | YIEIFK                            | R | S | 812.4553 |
| 3337 | HNRNPH2 Heterogeneous nuclear ribonucleoprotein H2                                               | IPI00026230                                     | 49,246.10 | 180 | 185 | YIEIFK                            | R | S | 812.4553 |
| 3338 | XRCC4 Isoform 1 of DNA repair protein XRCC4                                                      | IPI00007672,IPI00019678,IPI00401064             | 38,269.70 | 180 | 188 | FILVLNEKK                         | R | T | 1,103.68 |
| 3339 | HNRNPK Isoform 1 of Heterogeneous nuclear ribonucleoprotein K                                    | IPI00216049,IPI00216746,IPI00807545,IPI00910458 | 50,960.50 | 180 | 191 | LFQECCPHSTDR                      | K | V | 1,549.65 |
| 3340 | PSMD13 proteasome 26S non-ATPase subunit 13 isoform 2                                            | IPI00375380,IPI00549672                         | 42,924.90 | 181 | 198 | FLGCVDIKLPVSEQQER                 | R | A | 2,133.06 |
| 3341 | PSMD13 proteasome 26S non-ATPase subunit 13 isoform 2                                            | IPI00375380,IPI00549672                         | 42,924.90 | 181 | 198 | FLGCVDIKLPVSEQQER                 | R | A | 2,133.06 |
| 3342 | PRDX5 Isoform Mitochondrial of Peroxiredoxin-5, mitochondrial                                    | IPI00024915,IPI00759663,IPI00876999             | 22,008.30 | 181 | 191 | FSMVVQDGIVK                       | R | A | 1,222.65 |
| 3343 | HSP90AA1 heat shock protein 90kDa alpha (cytosolic), class A member 1 isoform 1                  | IPI00382470,IPI00784295                         | 98,147.10 | 181 | 196 | IRYESLTDPSKLDGSK                  | K | E | 1,808.94 |
| 3344 | GNPDA1 Glucosamine-6-phosphate isomerase 1                                                       | IPI00009305                                     | 32,651.40 | 181 | 197 | VPTMALTGVGTVMDAR                  | K | E | 1,749.89 |
| 3345 | - Putative uncharacterized protein ENSP00000348237                                               | IPI00453476,IPI00549725                         | 28,832.80 | 181 | 191 | VLIAAHGNSLR                       | R | G | 1,150.67 |
| 3346 | TCP1 T-complex protein 1 subunit alpha                                                           | IPI00290566                                     | 60,327.20 | 181 | 185 | YTDIR                             | K | G | 667.341  |
| 3347 | AURKA Serine/threonine-protein kinase 6                                                          | IPI00298940                                     | 45,791.80 | 181 | 189 | EVEIQSHLR                         | R | H | 1,110.59 |
| 3348 | SPC25 Kinetochore protein Spc25                                                                  | IPI00010219                                     | 26,136.20 | 181 | 202 | DYEVSDSAPHLEGLAEFQEN<br>VR        | R | K | 2,505.15 |
| 3349 | CIP29 Nuclear protein Hcc-1                                                                      | IPI00014938,IPI00795769                         | 23,653.20 | 181 | 199 | FGIVTSSAGTGTTEDTEAK               | R | K | 1,871.89 |
| 3350 | APEH Acylamino-acid-releasing enzyme                                                             | IPI00337741                                     | 81,206.00 | 181 | 193 | ALDVSASDDEIAR                     | K | L | 1,361.65 |
| 3351 | APEH Acylamino-acid-releasing enzyme                                                             | IPI00337741                                     | 81,206.00 | 181 | 193 | ALDVSASDDEIAR                     | K | L | 1,361.65 |
| 3352 | HSP90AB1 Heat shock protein HSP 90-beta                                                          | IPI00414676                                     | 83,249.30 | 181 | 196 | VILHLKEDQTEYLEER                  | K | R | 2,015.04 |
| 3353 | COPS5 COP9 signalosome complex subunit 5                                                         | IPI00009958,IPI00556139                         | 37,561.90 | 181 | 187 | VNLGAFR                           | K | T | 776.4413 |
| 3354 | GPI Glucose-6-phosphate isomerase                                                                | IPI00027497                                     | 63,130.40 | 181 | 194 | VWYVSNIDGTHIAK                    | R | T | 1,602.83 |
| 3355 | SNRPB2 U2 small nuclear ribonucleoprotein B"                                                     | IPI00029267                                     | 25,469.50 | 182 | 204 | LVPGRHDIAFVEFENDGQAG<br>AAR       | R | D | 2,469.23 |
| 3356 | UBE2T Ubiquitin-conjugating enzyme E2 T                                                          | IPI00023087                                     | 22,503.80 | 182 | 192 | KASQLVGIKK                        | R | F | 1,200.73 |
| 3357 | RPL7 60S ribosomal protein L7                                                                    | IPI00030179,IPI00472171,IPI00871827             | 29,209.70 | 182 | 200 | YGIICMEDLIHEYTVGKR                | K | F | 2,326.16 |
| 3358 | MAT2A S-adenosylmethionine synthetase isoform type-2                                             | IPI00010157                                     | 43,642.80 | 182 | 192 | TQVTVQYMQDR                       | K | G | 1,384.65 |
| 3359 | API5 Isoform 2 of Apoptosis inhibitor 5                                                          | IPI00554742,IPI00555572,IPI00855856             | 56,754.30 | 182 | 196 | VLEDVTGEEFVLFMK                   | K | I | 1,771.88 |
| 3360 | ABCE1 ATP-binding cassette sub-family E member 1                                                 | IPI00303207                                     | 67,298.40 | 182 | 190 | GTVGSILDR                         | K | K | 917.5052 |
| 3361 | - cDNA FLJ54408, highly similar to Heat shock 70 kDa protein 1                                   | IPI00911039                                     | 63,907.90 | 182 | 192 | LVNHFVEEFKR                       | R | K | 1,417.76 |
| 3362 | CCT2 T-complex protein 1 subunit beta                                                            | IPI00297779                                     | 57,471.90 | 182 | 189 | LAVEAVLR                          | K | L | 870.5407 |
| 3363 | DCTN2 dynactin 2                                                                                 | IPI00220503,IPI00789792                         | 44,802.30 | 182 | 190 | LLLQLEATK                         | R | N | 1,028.64 |
| 3364 | CAPZB Isoform 2 of F-actin-capping protein subunit beta                                          | IPI00642256                                     | 30,611.70 | 182 | 195 | SGSGTMNLGGSLTR                    | K | Q | 1,353.64 |
| 3365 | MCM6 DNA replication licensing factor MCM6                                                       | IPI00031517                                     | 92,872.60 | 182 | 188 | NPVCANR                           | R | R | 830.3937 |
| 3366 | CCT8 T-complex protein 1 subunit theta                                                           | IPI00784090                                     | 59,603.00 | 182 | 203 | LIAQACVSIFPDSGHFNVDNIR            | K | V | 2,473.23 |
| 3367 | PCNA Proliferating cell nuclear antigen                                                          | IPI00021700                                     | 28,751.30 | 182 | 210 | LSQTSNVDKEEEAVTIEMNEP<br>VQLTFALR | K | Y | 3,307.64 |
| 3368 | PARK7 Protein DJ-1                                                                               | IPI00298547                                     | 19,873.10 | 183 | 189 | APLVLKD                           | K | - | 755.4663 |
| 3369 | PRDX6 Peroxiredoxin-6                                                                            | IPI00220301                                     | 25,018.10 | 183 | 199 | DGDSVMVLPTIPEEEAK                 | K | K | 1,845.88 |
| 3370 | RPS5 40S ribosomal protein S5                                                                    | IPI00008433                                     | 22,859.00 | 183 | 191 | GSSNSYAIK                         | K | K | 926.4577 |
| 3371 | TSN Translin                                                                                     | IPI00018768,IPI00917623                         | 26,165.40 | 183 | 192 | LLNLKNSLR                         | R | K | 1,185.70 |

|      |                                                                             |                                                             |           |     |     |                           |   |   |          |
|------|-----------------------------------------------------------------------------|-------------------------------------------------------------|-----------|-----|-----|---------------------------|---|---|----------|
| 3372 | TKT cDNA FLJ54957, highly similar to Transketolase                          | IPI00643920                                                 | 68,725.40 | 183 | 194 | LDNLVAILDINR              | K | L | 1,368.78 |
| 3373 | RUVBL1 Isoform 1 of RuvB-like 1                                             | IPI00021187                                                 | 50,211.40 | 183 | 202 | ERVEAGDVIYIEANS GAVKR     | K | Q | 2,176.14 |
| 3374 | TAGLN2 Transgelin-2                                                         | IPI00550363                                                 | 22,373.90 | 183 | 196 | GASQAGMTGYGMPR            | R | Q | 1,415.60 |
| 3375 | ILF3 Isoform 1 of Interleukin enhancer-binding factor 3                     | IPI00298788                                                 | 95,320.90 | 183 | 200 | VLAGETLSVNDPPDVLDR        | K | Q | 1,909.99 |
| 3376 | ILF3 Isoform 1 of Interleukin enhancer-binding factor 3                     | IPI00298788                                                 | 95,320.90 | 183 | 200 | VLAGETLSVNDPPDVLDR        | K | Q | 1,909.99 |
| 3377 | RBM4 Isoform 1 of RNA-binding protein 4                                     | IPI00003704                                                 | 40,296.20 | 183 | 198 | VADLTEQYNEQYGAVR          | R | T | 1,855.88 |
| 3378 | RBM4 Isoform 1 of RNA-binding protein 4                                     | IPI00003704                                                 | 40,296.20 | 183 | 198 | VADLTEQYNEQYGAVR          | R | T | 1,855.88 |
| 3379 | RPS7 40S ribosomal protein S7                                               | IPI00013415                                                 | 22,109.50 | 184 | 194 | DVNFEFPEFQL               | K | - | 1,384.64 |
| 3380 | TSEN34 27 kDa protein                                                       | IPI00657943,IPI00658061,IPI00894217                         | 27,261.80 | 184 | 199 | SALLVQLATARPRPVK          | R | A | 1,720.06 |
| 3381 | SAE1 SUMO-activating enzyme subunit 1                                       | IPI00033130,IPI00640965,IPI00647006                         | 38,432.10 | 184 | 196 | VSQGVEDGPDTKR             | K | A | 1,387.68 |
| 3382 | ARD1A N-terminal acetyltransferase complex ARD1 subunit homolog A           | IPI00013184                                                 | 26,441.00 | 184 | 198 | GNSPPSSGEACREEK           | K | G | 1,604.70 |
| 3383 | EIF2A Isoform 1 of Eukaryotic translation initiation factor 2A              | IPI00902564                                                 | 64,973.20 | 184 | 192 | VAVYVPGSK                 | K | G | 919.5247 |
| 3384 | HNRNPD Isoform 1 of Heterogeneous nuclear ribonucleoprotein D0              | IPI0022888,IPI00220684                                      | 38,416.50 | 184 | 197 | IFVGGLSPDTPEEK            | K | I | 1,488.76 |
| 3385 | HNRNPD Isoform 1 of Heterogeneous nuclear ribonucleoprotein D0              | IPI0022888,IPI00220684                                      | 38,416.50 | 184 | 197 | IFVGGLSPDTPEEK            | K | I | 1,488.76 |
| 3386 | ENO1 Isoform alpha-enolase of Alpha-enolase                                 | IPI00465248                                                 | 47,152.20 | 184 | 193 | IGAEVYHNLK                | R | N | 1,143.62 |
| 3387 | ENO1 Isoform alpha-enolase of Alpha-enolase                                 | IPI00465248                                                 | 47,152.20 | 184 | 193 | IGAEVYHNLK                | R | N | 1,143.62 |
| 3388 | ENO1 Isoform alpha-enolase of Alpha-enolase                                 | IPI00465248                                                 | 47,152.20 | 184 | 193 | IGAEVYHNLK                | R | N | 1,143.62 |
| 3389 | RBP1 retinol binding protein 1, cellular isoform a                          | IPI00219718                                                 | 22,292.30 | 184 | 190 | VEGVVCK                   | R | Q | 790.4128 |
| 3390 | SAE1 SUMO-activating enzyme subunit 1                                       | IPI00033130,IPI00640965,IPI00647006                         | 38,432.10 | 184 | 195 | VSQGVEDGPDTK              | K | R | 1,231.58 |
| 3391 | SAE1 SUMO-activating enzyme subunit 1                                       | IPI00033130,IPI00640965,IPI00647006                         | 38,432.10 | 184 | 195 | VSQGVEDGPDTK              | K | R | 1,231.58 |
| 3392 | GHDC Isoform 1 of GH3 domain-containing protein                             | IPI00427501,IPI00427502,IPI00909449                         | 57,505.60 | 184 | 191 | ALLLDALR                  | R | S | 884.5565 |
| 3393 | RAB5B Ras-related protein Rab-5B                                            | IPI00017344,IPI00908835                                     | 23,688.90 | 184 | 195 | SEPQNLGGAAGR              | K | S | 1,156.57 |
| 3394 | CMPK1 cytidine monophosphate (UMP-CMP) kinase 1, cytosolic isoform a        | IPI00219953                                                 | 25,837.80 | 184 | 203 | IQTYLQSTKPIIDL YEEMGK     | R | V | 2,386.22 |
| 3395 | SAR1A GTP-binding protein SAR1a                                             | IPI00015954                                                 | 22,349.70 | 184 | 191 | QGYGEGFR                  | R | W | 913.4163 |
| 3396 | RPA1 Replication protein A 70 kDa DNA-binding subunit                       | IPI00020127                                                 | 68,121.00 | 184 | 196 | VVPIASLTPYQSK             | K | W | 1,402.79 |
| 3397 | CTBP1 C-terminal-binding protein 1                                          | IPI00012835,IPI00554626                                     | 47,517.40 | 185 | 192 | VGQAVLR                   | R | A | 813.4941 |
| 3398 | RPS8 40S ribosomal protein S8                                               | IPI00216587,IPI00872430                                     | 24,188.40 | 185 | 193 | ADGYVLE GK                | R | E | 951.4783 |
| 3399 | RPS8 40S ribosomal protein S8                                               | IPI00216587,IPI00872430                                     | 24,188.40 | 185 | 193 | ADGYVLE GK                | R | E | 951.4783 |
| 3400 | PRPS1 Ribose-phosphate pyrophosphokinase 1                                  | IPI00219616,IPI00917169                                     | 34,816.70 | 185 | 194 | LNVD FALIHK               | R | E | 1,169.67 |
| 3401 | XRCC5 ATP-dependent DNA helicase 2 subunit 2                                | IPI00220834,IPI00871391                                     | 82,689.10 | 185 | 195 | LGHG P S F P L K          | R | G | 1,109.61 |
| 3402 | PELO Protein pelota homolog                                                 | IPI00106698                                                 | 43,358.40 | 185 | 195 | FYEQV V Q A I Q R         | R | H | 1,380.73 |
| 3403 | PGK1 Phosphoglycerate kinase 1                                              | IPI00169383                                                 | 44,597.30 | 185 | 191 | AGGF L M K                | K | K | 723.3859 |
| 3404 | DDX21 Isoform 1 of Nucleolar RNA helicase 2                                 | IPI00015953                                                 | 87,328.00 | 185 | 199 | EGAFS N F P I S E E T I K | K | L | 1,668.81 |
| 3405 | SEC13 Protein SEC13 homolog                                                 | IPI00375370,IPI00479141,IPI00789169,IPI00789755,IPI00853598 | 35,838.00 | 185 | 195 | FASGGCDNL I K             | R | L | 1,181.56 |
| 3406 | GNB2L1 38 kDa protein                                                       | IPI00641950,IPI00848226                                     | 37,740.10 | 185 | 201 | FSPNSSNPII V S C G W D K  | R | L | 1,907.90 |
| 3407 | RAB5C Ras-related protein Rab-5C                                            | IPI00016339                                                 | 23,464.70 | 185 | 196 | NEPQNATGAPGR              | K | N | 1,211.58 |
| 3408 | RUVBL1 Isoform 1 of RuvB-like 1                                             | IPI00021187                                                 | 50,211.40 | 185 | 202 | VEAGDVIYIEANS GAVKR       | R | Q | 1,890.99 |
| 3409 | RUVBL1 Isoform 1 of RuvB-like 1                                             | IPI00021187                                                 | 50,211.40 | 185 | 201 | VEAGDVIYIEANS GAVK        | R | R | 1,734.89 |
| 3410 | SGTA Small glutamine-rich tetratricopeptide repeat-containing protein alpha | IPI00013949                                                 | 34,045.90 | 185 | 196 | ALELDPDNETYK              | K | S | 1,407.66 |
| 3411 | PFKL Isoform 1 of 6-phosphofructokinase, liver type                         | IPI00332371,IPI00902982                                     | 85,001.20 | 185 | 201 | IMEVIDAITTTAQSHQR         | R | T | 1,929.97 |
| 3412 | PTGR1 Prostaglandin reductase 1                                             | IPI00292657                                                 | 35,852.50 | 185 | 194 | LGFDVVFNYK                | K | T | 1,201.63 |
| 3413 | RFC5 Replication factor C subunit 5                                         | IPI00031514,IPI00373883                                     | 38,480.40 | 186 | 203 | LEHVVEEEKVDISEDG MK       | R | A | 2,102.00 |
| 3414 | FDFT1 Squalene synthetase                                                   | IPI00020944,IPI00908715                                     | 48,098.40 | 186 | 203 | LFSASEFEDPLVGEDTER        | R | A | 2,040.94 |
| 3415 | RFC4 Replication factor C subunit 4                                         | IPI00017381,IPI00792595                                     | 39,664.50 | 186 | 193 | IIEPLTSR                  | R | C | 928.5463 |

|      |                                                                                    |                                                 |           |     |     |                             |   |   |          |
|------|------------------------------------------------------------------------------------|-------------------------------------------------|-----------|-----|-----|-----------------------------|---|---|----------|
| 3416 | FSCN1 Fascin                                                                       | IPI00163187,IPI00747810                         | 54,512.30 | 186 | 194 | YSVQTADHR                   | R | F | 1,076.51 |
| 3417 | PPP2CA Serine/threonine-protein phosphatase 2A catalytic subunit alpha isoform     | IPI00008380                                     | 35,576.50 | 186 | 206 | LQEVPHGPMCDLLWSDPDD R       | R | G | 2,509.11 |
| 3418 | PCCA propionyl-Coenzyme A carboxylase, alpha polypeptide isoform a precursor       | IPI00744115,IPI00796978,IPI00895869             | 80,041.20 | 186 | 207 | KAEVNTIPGFDGVVKDAEEAV R     | K | I | 2,344.21 |
| 3419 | AASDHPPT L-aminoadipate-semialdehyde dehydrogenase-phosphopantetheinyl transferase | IPI00250297                                     | 35,759.10 | 186 | 197 | AIGVGLGFELQR                | K | L | 1,259.71 |
| 3420 | SYAP1 Synapse-associated protein 1                                                 | IPI00059242                                     | 39,915.40 | 186 | 191 | FALVPK                      | R | L | 674.4236 |
| 3421 | SYAP1 Synapse-associated protein 1                                                 | IPI00059242                                     | 39,915.40 | 186 | 191 | FALVPK                      | R | L | 674.4236 |
| 3422 | CORO1C Coronin-1C_i3 protein                                                       | IPI00867509                                     | 58,930.80 | 186 | 196 | VGIVAWHPTAR                 | R | N | 1,206.67 |
| 3423 | HMOX1 Heme oxygenase 1                                                             | IPI00215893                                     | 32,801.10 | 186 | 196 | MNSLEMTPAVR                 | R | Q | 1,280.60 |
| 3424 | PNPO Pyridoxine-5'-phosphate oxidase                                               | IPI00018272,IPI00793232                         | 29,970.20 | 186 | 204 | KKNEELEQLYQDQEVKPKK         | R | S | 2,343.22 |
| 3425 | ATG3 Isoform 1 of Autophagy-related protein 3                                      | IPI00022254                                     | 35,846.20 | 186 | 198 | TDAGGEDAILQTR               | K | T | 1,346.65 |
| 3426 | UCHL3 Ubiquitin carboxyl-terminal hydrolase isozyme L3                             | IPI00011250                                     | 26,164.80 | 187 | 211 | KPFPINHGGETSDETLLEDAIEV CKK | R | F | 2,870.42 |
| 3427 | PSMC2 26S protease regulatory subunit 7                                            | IPI00021435                                     | 48,617.60 | 187 | 200 | LREVVETPLLHPER              | K | F | 1,687.95 |
| 3428 | EIF3L Eukaryotic translation initiation factor 3, subunit E interacting protein    | IPI00465233,IPI00745266                         | 70,886.50 | 187 | 196 | VSGGPSLEQR                  | K | F | 1,029.53 |
| 3429 | HSPA5 HSPA5 protein                                                                | IPI00003362                                     | 72,405.60 | 187 | 198 | DAGTIAGLNVMR                | K | I | 1,217.63 |
| 3430 | PSMD3 26S proteasome non-ATPase regulatory subunit 3                               | IPI00011603                                     | 60,961.60 | 187 | 194 | ISDDLQMK                    | K | I | 965.4611 |
| 3431 | AK2 Isoform 1 of Adenylate kinase isoenzyme 2, mitochondrial                       | IPI00215901                                     | 26,461.00 | 187 | 202 | LQAYHTQTTPLIEYYR            | R | K | 1,997.01 |
| 3432 | PDCD10 Programmed cell death protein 10                                            | IPI00298558                                     | 24,684.50 | 187 | 196 | AINVFSANR                   | K | L | 1,090.60 |
| 3433 | PABPC1 Isoform 1 of Polyadenylate-binding protein 1                                | IPI00008524                                     | 70,653.30 | 187 | 196 | AKEFTNVYIK                  | R | N | 1,212.66 |
| 3434 | PABPC4 Isoform 1 of Polyadenylate-binding protein 4                                | IPI00012726,IPI00555747,IPI00642904,IPI00642944 | 70,765.80 | 187 | 196 | AKEFTNVYIK                  | K | N | 1,212.66 |
| 3435 | RAB2B Ras-related protein Rab-2B                                                   | IPI00102896                                     | 24,197.10 | 187 | 204 | IGPQQSISTSVGPSASQR          | K | N | 1,799.92 |
| 3436 | HNRNPU heterogeneous nuclear ribonucleoprotein U isoform a                         | IPI00644079                                     | 90,567.20 | 187 | 204 | SSGPTSLFAVTVAPPGAR          | K | Q | 1,714.91 |
| 3437 | DNAJB12 DnaJ (Hsp40) homolog, subfamily B, member 12                               | IPI00014400                                     | 45,472.60 | 187 | 200 | AIGTAYAVLSNPEK              | K | R | 1,433.76 |
| 3438 | EEF1D Elongation factor 1-delta                                                    | IPI00023048                                     | 31,103.90 | 187 | 195 | AKKPALVAK                   | K | S | 925.6194 |
| 3439 | BUB3 Mitotic checkpoint protein BUB3                                               | IPI00013468,IPI00514701,IPI00644108             | 37,136.70 | 187 | 202 | AFPNNKQGYVLSSIEGR           | R | V | 1,765.92 |
| 3440 | TPI1 Isoform 1 of Triosephosphate isomerase                                        | IPI00465028                                     | 30,772.80 | 187 | 197 | VIADNVKDWSK                 | K | V | 1,274.67 |
| 3441 | C11orf73 Uncharacterized protein C11orf73                                          | IPI00410091                                     | 21,609.50 | 188 | 196 | LAQNPLFWK                   | R | - | 1,116.62 |
| 3442 | HNRPDL Isoform 1 of Heterogeneous nuclear ribonucleoprotein D-like                 | IPI00011274,IPI00045498,IPI00845282             | 46,420.60 | 188 | 197 | SRGFGFVLFK                  | R | D | 1,157.65 |
| 3443 | EEF1G cDNA FLJ56389, highly similar to Elongation factor 1-gamma                   | IPI00000875,IPI00747497                         | 56,132.90 | 188 | 197 | ILGLLDAYLK                  | R | T | 1,118.68 |
| 3444 | PSMA4 Proteasome subunit alpha type-4                                              | IPI00299155,IPI00790207                         | 29,466.80 | 188 | 195 | SALALAIK                    | K | V | 786.5084 |
| 3445 | SH3GLB1 Isoform 1 of Endophilin-B1                                                 | IPI00006558                                     | 40,780.00 | 189 | 196 | NSSEQELR                    | R | I | 962.4537 |
| 3446 | PKM2 Isoform M1 of Pyruvate kinase isozymes M1/M2                                  | IPI00220644,IPI00479186                         | 58,044.60 | 189 | 206 | GADFLVTEVENGGSLGSK          | K | K | 1,779.88 |
| 3447 | LAP3 Isoform 1 of Cytosol aminopeptidase                                           | IPI00419237,IPI00789806                         | 56,149.70 | 189 | 200 | GVLFASGQNLAR                | K | Q | 1,232.67 |
| 3448 | EEF1D Elongation factor 1-delta                                                    | IPI00023048                                     | 31,103.90 | 189 | 195 | KPALVAK                     | K | S | 726.4873 |
| 3449 | GSTP1 Glutathione S-transferase P                                                  | IPI00219757                                     | 23,338.70 | 190 | 210 | LKAFLASPEYVNLPIPINGNGKQ     | K | - | 2,273.23 |
| 3450 | FKBP4 FK506-binding protein 4                                                      | IPI00219005                                     | 51,787.90 | 190 | 206 | FEIGEGENLDLPYGLER           | R | A | 1,950.94 |
| 3451 | TCP1 T-complex protein 1 subunit alpha                                             | IPI00290566                                     | 60,327.20 | 190 | 199 | YPVNSVNILK                  | R | A | 1,146.65 |
| 3452 | HNRPDL Isoform 1 of Heterogeneous nuclear ribonucleoprotein D-like                 | IPI00011274,IPI00045498,IPI00845282             | 46,420.60 | 190 | 197 | GFGFVLFK                    | R | D | 914.5135 |
| 3453 | SLC25A3 Isoform A of Phosphate carrier protein, mitochondrial                      | IPI00022202,IPI00215777,IPI00790115             | 40,077.90 | 190 | 201 | IQTQPGYANTLR                | R | D | 1,361.72 |
| 3454 | SLC25A3 Isoform A of Phosphate carrier protein, mitochondrial                      | IPI00022202,IPI00215777,IPI00790115             | 40,077.90 | 190 | 201 | IQTQPGYANTLR                | R | D | 1,361.72 |
| 3455 | DDOST dolichyl-diphosphooligosaccharide-protein glycosyltransferase precursor      | IPI00297084,IPI00910419                         | 50,784.50 | 190 | 198 | SSLNPILFR                   | K | G | 1,046.60 |



|      |                                                                                         |                                                             |            |     |     |                                |   |   |          |
|------|-----------------------------------------------------------------------------------------|-------------------------------------------------------------|------------|-----|-----|--------------------------------|---|---|----------|
| 3456 | PNO1 RNA-binding protein PNO1                                                           | IPI00024524                                                 | 27,907.30  | 190 | 199 | TKFTIENVTR                     | K | T | 1,208.66 |
| 3457 | NP cDNA FLJ25678 fis, clone TST04067, highly similar to PURINE NUCLEOSIDE PHOSPHORYLASE | IPI00017672,IPI00871140                                     | 32,533.50  | 190 | 211 | ELQEGTYVMVAGPSFETVAE CR        | R | V | 2,473.14 |
| 3458 | PSMD7 26S proteasome non-ATPase regulatory subunit 7                                    | IPI00019927                                                 | 37,007.50  | 191 | 199 | ITNQVHGLK                      | R | G | 1,009.58 |
| 3459 | NONO Non-POU domain-containing octamer-binding protein                                  | IPI00304596                                                 | 54,213.60  | 191 | 202 | GIVEFSGKPAAR                   | K | K | 1,231.68 |
| 3460 | IGF2BP1 Insulin-like growth factor 2 mRNA-binding protein 1                             | IPI00008557                                                 | 63,438.30  | 191 | 199 | QQQVDIPLR                      | K | L | 1,096.61 |
| 3461 | MUL1 Mitochondrial ubiquitin ligase activator of NFKB 1                                 | IPI00470595                                                 | 39,781.50  | 191 | 209 | VGATLTGVGELVLDNNSVR            | K | L | 1,914.03 |
| 3462 | INO80E INO80 complex subunit E                                                          | IPI00168357,IPI00815939                                     | 26,461.60  | 191 | 207 | GSGAGVGTTLTLPPLPPK             | R | M | 1,549.86 |
| 3463 | HNRNPA2B1 43 kDa protein                                                                | IPI00874030                                                 | 43,234.30  | 191 | 208 | DYFEEYKIDTIEITDR               | R | Q | 2,220.07 |
| 3464 | INO80E INO80 complex subunit E                                                          | IPI00168357,IPI00815939                                     | 26,461.60  | 191 | 219 | GSGAGVGTTLTLPPLPPKMPP PTLSTVPR | R | Q | 2,855.57 |
| 3465 | RBBP5 cDNA FLJ59722, highly similar to Retinoblastoma-binding protein 5                 | IPI00478230,IPI00645975                                     | 55,054.60  | 191 | 202 | VTTGTSNTTAAIK                  | R | S | 1,193.64 |
| 3466 | GSTP1 Glutathione S-transferase P                                                       | IPI00219757                                                 | 23,338.70  | 192 | 209 | AFLASPEYVNLPIPINGNGK           | K | - | 1,903.99 |
| 3467 | GSTP1 Glutathione S-transferase P                                                       | IPI00219757                                                 | 23,338.70  | 192 | 210 | AFLASPEYVNLPIPINGNGKQ          | K | - | 2,032.05 |
| 3468 | KPNB1 Importin subunit beta-1                                                           | IPI00001639                                                 | 97,153.30  | 192 | 206 | LAATNALLNSLEFTK                | K | A | 1,605.88 |
| 3469 | JUP Junction plakoglobin                                                                | IPI00554711                                                 | 81,727.90  | 192 | 203 | TMQNTSDLDтар                   | R | C | 1,368.61 |
| 3470 | - cDNA FLJ54554, highly similar to Pyruvate kinase isozymes M1/M2                       | IPI00910979                                                 | 56,255.30  | 192 | 215 | KGVNLPGAADLPAVSEKDIQ DLK       | K | F | 2,477.36 |
| 3471 | DDI2 Isoform 3 of Protein DDI1 homolog 2                                                | IPI00031618,IPI00796836,IPI00845258                         | 46,553.90  | 192 | 205 | LFSADPFDEAQAK                  | R | I | 1,551.77 |
| 3472 | BZW1 Isoform 2 of Basic leucine zipper and W2 domain-containing protein 1               | IPI00180128,IPI00785096,IPI00916112,IPI00916503,IPI00918019 | 40,522.00  | 192 | 207 | SWINEKDIVAASLR                 | K | K | 1,786.94 |
| 3473 | RAB1A Isoform 1 of Ras-related protein Rab-1A                                           | IPI00005719,IPI00873902                                     | 22,660.40  | 192 | 198 | IQSTPVK                        | K | Q | 772.4564 |
| 3474 | MDH2 Malate dehydrogenase, mitochondrial                                                | IPI00291006                                                 | 35,485.70  | 192 | 203 | VNVPVIGGHAGK                   | R | T | 1,147.66 |
| 3475 | SRPRB Signal recognition particle receptor subunit beta                                 | IPI00295098                                                 | 29,685.10  | 192 | 205 | LIQQQLEKELNTLR                 | K | V | 1,725.99 |
| 3476 | BUB3 Mitotic checkpoint protein BUB3                                                    | IPI00013468,IPI00514701,IPI00644108                         | 37,136.70  | 192 | 202 | QGYVLSSIEGR                    | K | V | 1,208.63 |
| 3477 | HNRNPK Isoform 1 of Heterogeneous nuclear ribonucleoprotein K                           | IPI00216049,IPI00216746,IPI00807545,IPI00910458             | 50,960.50  | 192 | 201 | VVLIGGKPDР                     | R | V | 1,053.64 |
| 3478 | SPR Sepiapterin reductase                                                               | IPI00017469                                                 | 28,031.50  | 193 | 210 | VLNYAPGPLDТDMQQLAR             | R | E | 2,018.00 |
| 3479 | CDC16 Isoform 1 of Cell division cycle protein 16 homolog                               | IPI00022091,IPI00376312,IPI00376313,IPI00642377             | 71,639.80  | 193 | 202 | LCNEEQELLR                     | K | F | 1,303.63 |
| 3480 | SNRPA1 U2 small nuclear ribonucleoprotein A'                                            | IPI00297477                                                 | 28,399.10  | 193 | 219 | KGGPSPGDVEAIKNAIANAST LAEVER   | K | L | 2,694.41 |
| 3481 | EZR Ezrin                                                                               | IPI00746388,IPI00843975,IPI00872684                         | 69,265.40  | 193 | 208 | IAQDLEMYGINYFEIK               | K | N | 1,962.95 |
| 3482 | NUDC Nuclear migration protein nudC                                                     | IPI00550746                                                 | 38,225.70  | 193 | 204 | LKGKDMVVDIQR                   | R | R | 1,401.79 |
| 3483 | TALDO1 Transaldolase                                                                    | IPI00744692                                                 | 37,523.70  | 193 | 204 | ILDWHVANTDKK                   | R | S | 1,439.76 |
| 3484 | RCC1 regulator of chromosome condensation 1 isoform a                                   | IPI00001661,IPI00747309,IPI00787306                         | 48,126.30  | 193 | 207 | SMVPVQVQLDVPVVK                | K | V | 1,653.92 |
| 3485 | DTD1 D-tyrosyl-tRNA(Tyr) deacylase 1                                                    | IPI00152692                                                 | 23,405.60  | 194 | 209 | SASSGAEGDVSSEREP               | R | - | 1,564.67 |
| 3486 | CCT4 T-complex protein 1 subunit delta                                                  | IPI00302927,IPI00873222                                     | 57,907.90  | 194 | 206 | VIDPATATSVDLR                  | K | D | 1,357.73 |
| 3487 | PRPF18 Isoform 1 of Pre-mRNA-splicing factor 18                                         | IPI00021146,IPI00644341                                     | 39,843.60  | 194 | 201 | FLLGVWAK                       | K | E | 933.5557 |
| 3488 | ST13 Hsc70-interacting protein                                                          | IPI00032826                                                 | 41,314.40  | 194 | 222 | LLGHWEEAAHDLALACKLDY DEDASAMLK | R | E | 3,285.56 |
| 3489 | RARS Isoform Complexed of Arginyl-tRNA synthetase, cytoplasmic                          | IPI00004860                                                 | 75,364.00  | 194 | 205 | VIVDFSSPNIAC                   | K | E | 1,289.71 |
| 3490 | SERPINB6 Putative uncharacterized protein DKFZp686I04222                                | IPI00413451,IPI00749398                                     | 46,353.40  | 194 | 203 | LVLVNAVYFR                     | R | G | 1,193.70 |
| 3491 | SERPINB6 Putative uncharacterized protein DKFZp686I04222                                | IPI00413451,IPI00749398                                     | 46,353.40  | 194 | 203 | LVLVNAVYFR                     | R | G | 1,193.70 |
| 3492 | ACTN4 Alpha-actinin-4                                                                   | IPI00013808                                                 | 104,839.20 | 194 | 204 | DGLAFNALIHR                    | K | H | 1,226.66 |
| 3493 | NDFIP2 NEDD4 family-interacting protein 2                                               | IPI00385038,IPI00910797,IPI00911105                         | 36,372.50  | 194 | 207 | AAAMAAAAAETSQR                 | K | I | 1,335.63 |
| 3494 | ST13 Hsc70-interacting protein                                                          | IPI00032826                                                 | 41,314.40  | 194 | 210 | LLGHWEEAAHDLALACK              | R | L | 1,933.96 |

|      |                                                                                                  |                                                             |           |     |     |                       |   |   |          |
|------|--------------------------------------------------------------------------------------------------|-------------------------------------------------------------|-----------|-----|-----|-----------------------|---|---|----------|
| 3495 | ACOT7 Isoform 1 of Cytosolic acyl coenzyme A thioester hydrolase                                 | IPI00010415,IPI00219451,IPI00219452,IPI00395748             | 41,777.00 | 194 | 201 | YEAQKLER              | R | M | 1,036.54 |
| 3496 | PSMA7 Isoform 1 of Proteasome subunit alpha type-7                                               | IPI00024175                                                 | 27,869.10 | 194 | 204 | ALLEVVQSGGK           | K | N | 1,100.63 |
| 3497 | PSMA1 Isoform Short of Proteasome subunit alpha type-1                                           | IPI00016832,IPI00472442                                     | 29,538.00 | 194 | 208 | ALRETLPAEQDLTTK       | R | N | 1,685.91 |
| 3498 | MSN Moesin                                                                                       | IPI00219365,IPI00872814                                     | 67,803.80 | 194 | 209 | IAQDLEMYGVNYFSIK      | K | N | 1,906.93 |
| 3499 | CDC123 Cell division cycle protein 123 homolog                                                   | IPI00005670                                                 | 39,118.10 | 194 | 204 | DYTQYYDHISK           | R | Q | 1,432.64 |
| 3500 | PFKP 6-phosphofructokinase type C                                                                | IPI00009790                                                 | 85,579.40 | 194 | 210 | IIEVVDAIMTTAQSHQR     | R | T | 1,927.99 |
| 3501 | NOSIP Nitric oxide synthase-interacting protein                                                  | IPI00006408                                                 | 33,154.00 | 194 | 211 | MSDLTPVHFTPLDSSVDR    | R | V | 2,016.97 |
| 3502 | ATP5A1 ATP synthase subunit alpha, mitochondrial                                                 | IPI00440493                                                 | 59,734.10 | 195 | 204 | AVDSLVPIGR            | K | G | 1,026.59 |
| 3503 | KHDRBS1 Isoform 1 of KH domain-containing, RNA-binding, signal transduction-associated protein 1 | IPI00008575,IPI00385834,IPI00479209                         | 48,210.20 | 195 | 200 | ISVLGK                | K | G | 616.4029 |
| 3504 | STUB1 Isoform 1 of STIP1 homology and U box-containing protein 1                                 | IPI00025156                                                 | 34,839.00 | 195 | 203 | AQQACIEAK             | R | H | 1,018.50 |
| 3505 | WDR61 WD repeat-containing protein 61                                                            | IPI00019269                                                 | 33,562.80 | 195 | 215 | SLTFSPDSQLLVASDDGYIK  | R | I | 2,257.12 |
| 3506 | RDH11 Isoform 1 of Retinol dehydrogenase 11                                                      | IPI00339384                                                 | 35,368.50 | 195 | 206 | FYNAGLAYCHSK          | K | L | 1,430.65 |
| 3507 | PSMD11 Proteasome 26S non-ATPase subunit 11 variant (Fragment)                                   | IPI00105598                                                 | 47,519.40 | 195 | 205 | TTANAIYCPPK           | R | L | 1,235.61 |
| 3508 | RCC2 Protein RCC2                                                                                | IPI00465044                                                 | 56,066.80 | 195 | 211 | LIEGLSHEVIVSAACGR     | R | N | 1,810.95 |
| 3509 | KIFC1 Kinesin-like protein KIFC1                                                                 | IPI00306400                                                 | 73,730.10 | 195 | 207 | VQAQAEQGQQLK          | K | N | 1,456.74 |
| 3510 | NUDC Nuclear migration protein nudC                                                              | IPI00550746                                                 | 38,225.70 | 195 | 204 | GKDMVVDIQR            | K | R | 1,176.60 |
| 3511 | DAZAP1 Isoform 1 of DAZ-associated protein 1                                                     | IPI00165230,IPI00335930                                     | 43,365.00 | 195 | 209 | SQAPGQPGASQWGSR       | K | V | 1,513.71 |
| 3512 | RBMX Heterogeneous nuclear ribonucleoprotein G                                                   | IPI00304692                                                 | 42,315.70 | 196 | 203 | REPLPSRR              | R | D | 1,010.59 |
| 3513 | RBMX Heterogeneous nuclear ribonucleoprotein G                                                   | IPI00304692                                                 | 42,315.70 | 196 | 203 | REPLPSRR              | R | D | 1,010.59 |
| 3514 | DDX5 Probable ATP-dependent RNA helicase DDX5                                                    | IPI00017617                                                 | 69,131.70 | 196 | 207 | LKSTCIYGGAPK          | R | G | 1,294.68 |
| 3515 | HNRNPR heterogeneous nuclear ribonucleoprotein R isoform 1                                       | IPI00644055                                                 | 71,197.20 | 196 | 206 | LMMDPLSGQNR           | R | G | 1,293.59 |
| 3516 | TCEAL4 Isoform 2 of Transcription elongation factor A protein-like 4                             | IPI00647163,IPI00657999,IPI00829838                         | 40,560.50 | 196 | 205 | TGDEEMLKDK            | K | G | 1,181.54 |
| 3517 | FBL rRNA 2'-O-methyltransferase fibrillarin                                                      | IPI00025039                                                 | 33,766.10 | 196 | 205 | SGRDILNLAKE           | R | K | 1,086.63 |
| 3518 | DNAJB1 DnaJ homolog subfamily B member 1                                                         | IPI00015947                                                 | 38,027.60 | 196 | 209 | SIRNEDKILTIEVK        | K | K | 1,657.95 |
| 3519 | GRB2 Isoform 1 of Growth factor receptor-bound protein 2                                         | IPI00021327                                                 | 25,188.80 | 196 | 207 | GACHGQTGMFPR          | K | N | 1,318.58 |
| 3520 | OCIAD1 Isoform 1 of OCIA domain-containing protein 1                                             | IPI00016405                                                 | 27,608.80 | 196 | 203 | NITYEELR              | K | N | 1,037.53 |
| 3521 | PRMT1 HMT1 hnRNP methyltransferase-like 2 isoform 1                                              | IPI00018522,IPI00215734,IPI00382516,IPI00909470,IPI00914913 | 42,444.20 | 196 | 206 | ATLYVTAIEDR           | R | Q | 1,251.66 |
| 3522 | KIAA0841 Isoform 1 of Uncharacterized protein KIAA0841                                           | IPI00014220,IPI00440233                                     | 71,665.00 | 196 | 208 | AQFLQNLLLPAK          | R | R | 1,483.86 |
| 3523 | TXNL1 Thioredoxin-like protein 1                                                                 | IPI00305692,IPI00642032                                     | 32,233.40 | 196 | 202 | IFINLPR               | K | S | 872.5353 |
| 3524 | C21orf70 Isoform A of Uncharacterized protein C21orf70                                           | IPI00027898,IPI00217294                                     | 25,438.70 | 197 | 207 | FQELLASPAYR           | R | A | 1,294.68 |
| 3525 | HNRNPA1 Isoform A1-B of Heterogeneous nuclear ribonucleoprotein A1                               | IPI00215965,IPI00465365                                     | 38,828.10 | 197 | 206 | SGSGNFGGGR            | R | G | 895.4017 |
| 3526 | ILF2 Interleukin enhancer-binding factor 2                                                       | IPI00005198,IPI00872107                                     | 43,044.70 | 197 | 206 | VLQSALAAIR            | K | H | 1,041.64 |
| 3527 | FAM98B Protein FAM98B                                                                            | IPI00167572,IPI00760837                                     | 37,174.50 | 197 | 209 | MDLNSEQAEQLER         | K | I | 1,578.71 |
| 3528 | SAE1 SUMO-activating enzyme subunit 1                                                            | IPI00033130,IPI00640965,IPI00647006                         | 38,432.10 | 197 | 208 | AKLDSSETTMVK          | R | K | 1,325.66 |
| 3529 | SEH1L Isoform A of Nucleoporin SEH1-like                                                         | IPI00185533,IPI00220609                                     | 39,630.00 | 197 | 207 | VQIFEYENRTR           | K | K | 1,412.68 |
| 3530 | RPL7A 60S ribosomal protein L7a                                                                  | IPI00299573                                                 | 29,978.30 | 197 | 217 | KTCTTVAFTQVNSEDKGALAK | R | L | 2,269.15 |
| 3531 | CHMP2A Charged multivesicular body protein 2a                                                    | IPI00004416                                                 | 25,087.00 | 197 | 217 | KAEAAASALADADADLEERLK | K | N | 2,158.10 |
| 3532 | PSMA5 Proteasome subunit alpha type-5                                                            | IPI00291922                                                 | 26,393.30 | 197 | 203 | SSLILK                | K | Q | 773.5132 |
| 3533 | PSMA5 Proteasome subunit alpha type-5                                                            | IPI00291922                                                 | 26,393.30 | 197 | 203 | SSLILK                | K | Q | 773.5132 |

|      |                                                                                |                                                             |            |     |     |                                           |   |   |          |
|------|--------------------------------------------------------------------------------|-------------------------------------------------------------|------------|-----|-----|-------------------------------------------|---|---|----------|
| 3534 | PRDX3 Thioredoxin-dependent peroxide reductase, mitochondrial                  | IPI00024919,IPI00374151                                     | 27,674.70  | 197 | 207 | HLSVNDLPVGR                               | K | S | 1,206.66 |
| 3535 | CACYBP Isoform 1 of Calcyclin-binding protein                                  | IPI00395627                                                 | 26,192.30  | 197 | 208 | KIYEDGDDDMKR                              | K | T | 1,500.66 |
| 3536 | NPEPPS Puromycin-sensitive aminopeptidase                                      | IPI00026216                                                 | 103,261.10 | 198 | 208 | ATFDISLVVPK                               | K | D | 1,189.68 |
| 3537 | HNRPDL Isoform 1 of Heterogeneous nuclear ribonucleoprotein D-like             | IPI00011274,IPI00045498,IPI00845282                         | 46,420.60  | 198 | 209 | DAASVDKVLELK                              | K | E | 1,287.72 |
| 3538 | IGF2BP2 insulin-like growth factor 2 mRNA binding protein 2 isoform a          | IPI00179713,IPI00180983,IPI00743914                         | 66,104.40  | 198 | 211 | ILVPTQFVGAIGK                             | R | E | 1,455.89 |
| 3539 | VDAC3 Isoform 1 of Voltage-dependent anion-selective channel protein 3         | IPI00031804,IPI00294779                                     | 30,641.90  | 198 | 218 | VNEKIETSINLAWTAGSNTR                      | K | F | 2,318.17 |
| 3540 | CCT6A T-complex protein 1 subunit zeta                                         | IPI00027626,IPI00552590                                     | 58,007.30  | 198 | 208 | HKSETDTSLIR                               | K | G | 1,286.67 |
| 3541 | GDI2 cDNA FLJ60299, highly similar to Rab GDP dissociation inhibitor beta      | IPI00031461                                                 | 51,138.50  | 198 | 212 | TDDYLDQPCYETINR                           | R | I | 1,902.82 |
| 3542 | GDI2 cDNA FLJ60299, highly similar to Rab GDP dissociation inhibitor beta      | IPI00031461                                                 | 51,138.50  | 198 | 212 | TDDYLDQPCYETINR                           | R | I | 1,902.82 |
| 3543 | BZW1 Isoform 2 of Basic leucine zipper and W2 domain-containing protein 1      | IPI00180128,IPI00785096,IPI00916112,IPI00916503,IPI00918019 | 40,522.00  | 198 | 207 | DINAVAASLR                                | K | K | 1,029.57 |
| 3544 | CHMP2A Charged multivesicular body protein 2a                                  | IPI00004416                                                 | 25,087.00  | 198 | 215 | AEEAASALADADADLEER                        | K | L | 1,788.82 |
| 3545 | GNB1 Guanine nucleotide-binding protein G(I)/G(S)/G(T) subunit beta-1          | IPI00026268                                                 | 37,359.50  | 198 | 209 | LFVSGACDASAK                              | R | L | 1,225.59 |
| 3546 | GSTM3 Glutathione S-transferase Mu 3                                           | IPI00246975                                                 | 26,543.10  | 198 | 209 | IAAYLQSDQFCK                              | K | M | 1,443.69 |
| 3547 | UBAC2 Isoform 2 of Ubiquitin-associated domain-containing protein 2            | IPI00007034,IPI00168284,IPI00829996                         | 34,858.90  | 198 | 208 | IGMGATLDIQR                               | R | Q | 1,190.62 |
| 3548 | CACYBP Isoform 1 of Calcyclin-binding protein                                  | IPI00395627                                                 | 26,192.30  | 198 | 208 | IYEDGDDDMKR                               | K | T | 1,372.57 |
| 3549 | HSD17B11 Estradiol 17-beta-dehydrogenase 11                                    | IPI00329598                                                 | 32,946.80  | 198 | 212 | TLTDELAALQITGVK                           | K | T | 1,572.88 |
| 3550 | TPI1 Isoform 1 of Triosephosphate isomerase                                    | IPI00465028                                                 | 30,772.80  | 198 | 212 | VVLAYEPVWAIGTGK                           | K | T | 1,602.89 |
| 3551 | TPI1 Isoform 1 of Triosephosphate isomerase                                    | IPI00465028                                                 | 30,772.80  | 198 | 212 | VVLAYEPVWAIGTGK                           | K | T | 1,602.89 |
| 3552 | TPI1 Isoform 1 of Triosephosphate isomerase                                    | IPI00465028                                                 | 30,772.80  | 198 | 212 | VVLAYEPVWAIGTGK                           | K | T | 1,602.89 |
| 3553 | BASP1 Brain acid soluble protein 1                                             | IPI00299024                                                 | 22,675.30  | 199 | 227 | AQGPAAASAEKPKVEAPAA<br>SDQTVTVKE          | K | - | 2,892.42 |
| 3554 | ARD1A N-terminal acetyltransferase complex ARD1 subunit homolog A              | IPI00013184                                                 | 26,441.00  | 199 | 235 | GLAAEDSGGDSKDLSEVSET<br>TESTDVKDSSEASDSAS | K | - | 3,663.56 |
| 3555 | PAFAH1B3 Platelet-activating factor acetylhydrolase IB subunit gamma           | IPI00014808                                                 | 25,715.60  | 199 | 206 | LGYPVCR                                   | R | A | 965.4874 |
| 3556 | ARL8B cDNA FLJ56285, highly similar to ADP-ribosylation factor-like protein 8B | IPI00018871                                                 | 27,235.70  | 199 | 207 | MNLSAIQDR                                 | K | E | 1,047.53 |
| 3557 | CBR1 Carbonyl reductase [NADPH] 1                                              | IPI00295386                                                 | 30,356.80  | 199 | 206 | IGVTVLSR                                  | K | I | 844.5251 |
| 3558 | RPL13 60S ribosomal protein L13                                                | IPI00465361                                                 | 24,244.20  | 199 | 209 | AKEAAEQDVEK                               | R | K | 1,217.60 |
| 3559 | SAE1 SUMO-activating enzyme subunit 1                                          | IPI00033130,IPI00640965,IPI00647006                         | 38,432.10  | 199 | 208 | LDSETTMVK                                 | K | K | 1,126.53 |
| 3560 | EIF3I Eukaryotic translation initiation factor 3 subunit I                     | IPI00012795                                                 | 36,484.00  | 199 | 213 | DMTMFVTASKDNTAK                           | R | L | 1,691.76 |
| 3561 | PAF1 Isoform 1 of RNA polymerase II-associated factor 1 homolog                | IPI00300333                                                 | 59,958.00  | 199 | 212 | VTPVEVMPVFPDFK                            | R | M | 1,620.83 |
| 3562 | HNRNPA2B1 43 kDa protein                                                       | IPI00874030                                                 | 43,234.30  | 199 | 208 | IDTIEITDR                                 | K | Q | 1,188.65 |
| 3563 | HSPA5 HSPA5 protein                                                            | IPI00003362                                                 | 72,405.60  | 199 | 214 | IINEPTAAAIYGLDK                           | R | R | 1,659.90 |
| 3564 | RNASEH2A Ribonuclease H2 subunit A                                             | IPI00290192                                                 | 33,377.00  | 199 | 215 | LQDLTDYGGSGYPNDPK                         | K | T | 1,897.85 |
| 3565 | CDIPT Isoform 1 of CDP-diacylglycerol-3-phosphatidyltransferase                | IPI00645518,IPI00647250,IPI00902843,IPI00910287             | 23,522.30  | 200 | 209 | NMAALDAADR                                | R | A | 1,063.48 |
| 3566 | IGF2BP3 Isoform 1 of Insulin-like growth factor 2 mRNA-binding protein 3       | IPI00658000                                                 | 63,702.90  | 200 | 213 | LLVPTQFVGAIGK                             | R | E | 1,455.89 |
| 3567 | IGF2BP1 Insulin-like growth factor 2 mRNA-binding protein 1                    | IPI00008557                                                 | 63,438.30  | 200 | 213 | LLVPTQYVGAIGK                             | R | E | 1,471.89 |
| 3568 | ENO1 Isoform alpha-enolase of Alpha-enolase                                    | IPI00465248                                                 | 47,152.20  | 200 | 221 | YGKDATNVGDEGGFAPNILEN<br>K                | K | E | 2,309.10 |
| 3569 | AURKB Serine/threonine-protein kinase 12                                       | IPI00176642,IPI00796914                                     | 39,263.50  | 200 | 211 | DIKPENLLLGLK                              | R | G | 1,352.82 |
| 3570 | ADD1 Isoform 1 of Alpha-adducin                                                | IPI00019901,IPI00220158,IPI00376220                         | 80,937.90  | 200 | 209 | INLQGDIVDR                                | K | G | 1,142.62 |
| 3571 | PRDX6 Peroxiredoxin-6                                                          | IPI00220301                                                 | 25,018.10  | 200 | 204 | KLFPK                                     | K | G | 632.4131 |
| 3572 | CCT3 chaperonin containing TCP1, subunit 3 isoform b                           | IPI00290770,IPI00553185                                     | 60,446.30  | 200 | 215 | VEKIPGGIIEDSCVLR                          | R | G | 1,784.96 |



|      |                                                                        |                                     |           |     |     |                       |   |   |          |
|------|------------------------------------------------------------------------|-------------------------------------|-----------|-----|-----|-----------------------|---|---|----------|
| 3573 | CCT3 chaperonin containing TCP1, subunit 3 isoform b                   | IPI00290770,IPI00553185             | 60,446.30 | 200 | 215 | VEKIPGGIIEDSCVLR      | R | G | 1,784.96 |
| 3574 | AURKB Serine/threonine-protein kinase 12                               | IPI00176642,IPI00796914             | 39,263.50 | 200 | 215 | DIKPENLLLGLKGELK      | R | I | 1,780.06 |
| 3575 | CDK2 Cell division protein kinase 2                                    | IPI00031681                         | 33,912.70 | 200 | 214 | RALFPGDSEIDQLFR       | R | I | 1,763.91 |
| 3576 | SF3A3 Splicing factor 3A subunit 3                                     | IPI00029764                         | 58,833.30 | 200 | 212 | VKPLQDQNELFGK         | R | I | 1,515.82 |
| 3577 | CCT7 T-complex protein 1 subunit eta                                   | IPI00018465                         | 59,349.80 | 200 | 217 | VQGGALEDSQLVAGVAFK    | K | K | 1,788.95 |
| 3578 | MOBK1B Isoform 1 of Mps one binder kinase activator-like 1B            | IPI00301518                         | 25,062.60 | 200 | 210 | ELAPLQELIEK           | R | L | 1,282.73 |
| 3579 | GATAD2B Transcriptional repressor p66-beta                             | IPI00103554                         | 65,243.70 | 200 | 224 | TPVVQNAASIVQSPAHVGQ   | K | L | 2,513.35 |
| 3580 | PYCR2 Pyrroline-5-carboxylate reductase 2                              | IPI00470610,IPI00747534             | 33,619.80 | 200 | 215 | QGLSK                 |   |   |          |
| 3581 | WDR73 Putative uncharacterized protein WDR73                           | IPI00180704,IPI00873040             | 42,574.10 | 200 | 206 | RLAIQLGAQALLGAAK      | R | M | 1,593.98 |
| 3582 | ENO1 Isoform alpha-enolase of Alpha-enolase                            | IPI00465248                         | 47,152.20 | 200 | 228 | LGLVDTR               | R | Q | 773.4517 |
| 3583 | ENO1 Isoform alpha-enolase of Alpha-enolase                            | IPI00465248                         | 47,152.20 | 200 | 228 | YGKDATNVGDEGGFAPNILEN | K | T | 3,091.56 |
| 3584 | PGK1 Phosphoglycerate kinase 1                                         | IPI00169383                         | 44,597.30 | 200 | 216 | KEGLELLK              |   |   |          |
| 3585 | PITPNB Isoform 1 of Phosphatidylinositol transfer protein beta isoform | IPI00334907                         | 31,522.30 | 200 | 208 | YGKDATNVGDEGGFAPNILEN | K | T | 3,091.56 |
| 3586 | GAPDH Glyceraldehyde-3-phosphate dehydrogenase                         | IPI00219018                         | 36,035.30 | 201 | 215 | KEGLELLK              |   |   |          |
| 3587 | HDAC1 Histone deacetylase 1                                            | IPI00013774,IPI00289601             | 55,086.10 | 201 | 212 | ALESPERPFLAILGGAK     | K | V | 1,769.00 |
| 3588 | HNRNPA3 Isoform 1 of Heterogeneous nuclear ribonucleoprotein A3        | IPI00419373                         | 39,577.10 | 201 | 214 | FKWWGLQSK             | K | V | 1,179.63 |
| 3589 | PRDX4 Peroxiredoxin-4                                                  | IPI00011937,IPI00639945             | 30,523.10 | 201 | 208 | GALQNIIPASTGAAK       | R | A | 1,411.79 |
| 3590 | FEN1 Flap endonuclease 1                                               | IPI00026215                         | 42,576.20 | 201 | 211 | GLFIIDDK              | R | G | 920.509  |
| 3591 | PCBP1 Poly(rC)-binding protein 1                                       | IPI00016610                         | 37,480.20 | 201 | 237 | KLPIQEFHLSR           | K | I | 1,367.78 |
| 3592 | RPL7 60S ribosomal protein L7                                          | IPI00030179,IPI00472171,IPI00871827 | 29,209.70 | 201 | 212 | CSDAAGYPHATHDLEGPPLD  | R | L | 3,945.87 |
| 3593 | ACTR2 Actin-related protein 2                                          | IPI00005159                         | 44,743.70 | 201 | 214 | AYSIQGQHTISPLDLAK     | R | L | 1,540.79 |
| 3594 | PRDX4 Peroxiredoxin-4                                                  | IPI00011937,IPI00639945             | 30,523.10 | 201 | 212 | FKEANNFLWPFK          | R | L | 1,540.79 |
| 3595 | TIMM23 Mitochondrial import inner membrane translocase subunit Tim23   | IPI00007309                         | 21,926.20 | 202 | 209 | GYAFNHSADFETVR        | R | M | 1,613.73 |
| 3596 | SNRNP70 Isoform 2 of U1 small nuclear ribonucleoprotein 70 kDa         | IPI00219483,IPI00290204             | 50,601.30 | 202 | 209 | GLFIIDDKGILR          | R | Q | 1,359.80 |
| 3597 | PFKL Isoform 1 of 6-phosphofructokinase, liver type                    | IPI00332371,IPI00902982             | 85,001.20 | 202 | 210 | GSLQQSL               | K | - | 845.4728 |
| 3598 | FSCN1 Fascin                                                           | IPI00163187,IPI00747810             | 54,512.30 | 202 | 217 | GGADVNIIR             | R | H | 801.4214 |
| 3599 | HNRNPM Isoform 1 of Heterogeneous nuclear ribonucleoprotein M          | IPI00171903,IPI00383296             | 77,499.30 | 202 | 214 | TFVLEVMGR             | R | H | 1,051.56 |
| 3600 | ENO1 Isoform alpha-enolase of Alpha-enolase                            | IPI00465248                         | 47,152.20 | 203 | 221 | LVARPEPATGYTLEFR      | R | S | 1,819.97 |
| 3601 | EIF4A1 Eukaryotic initiation factor 4A-I                               | IPI00025491,IPI00871852             | 46,137.30 | 203 | 226 | LGSTVFVANLDYK         | R | V | 1,426.76 |
| 3602 | CCT3 chaperonin containing TCP1, subunit 3 isoform b                   | IPI00290770,IPI00553185             | 60,446.30 | 203 | 215 | DATNVGDEGGFAPNILENK   | K | E | 1,960.92 |
| 3603 | APEX1 DNA-(apurinic or apyrimidinic site) lyase                        | IPI00215911                         | 35,537.70 | 203 | 224 | LNSNTQVVLLSATMPSDVLEV | K | F | 2,603.40 |
| 3604 | BUB3 Mitotic checkpoint protein BUB3                                   | IPI00013468,IPI00514701,IPI00644108 | 37,136.70 | 203 | 216 | TKK                   |   |   |          |
| 3605 | BUB3 Mitotic checkpoint protein BUB3                                   | IPI00013468,IPI00514701,IPI00644108 | 37,136.70 | 203 | 216 | IPGGIIEDSCVLR         | K | G | 1,428.75 |
| 3606 | BUB3 Mitotic checkpoint protein BUB3                                   | IPI00013468,IPI00514701,IPI00644108 | 37,136.70 | 203 | 217 | KPLVLCGDLNVAHEEIDLRNP | R | G | 2,530.35 |
| 3607 | HAGH hydroxyacyl glutathione hydrolase isoform 1                       | IPI00003933,IPI00745553             | 33,787.50 | 203 | 210 | K                     |   |   |          |
| 3608 | NOP56 Nucleolar protein 5A                                             | IPI00411937                         | 66,034.00 | 203 | 212 | VAVEYLDPSPEVQK        | R | K | 1,573.81 |
| 3609 | APEX1 DNA-(apurinic or apyrimidinic site) lyase                        | IPI00215911                         | 35,537.70 | 203 | 221 | VAVEYLDPSPEVQK        | R | K | 1,573.81 |
| 3610 | ATP6V1A V-type proton ATPase catalytic subunit A                       | IPI00007682                         | 68,287.40 | 203 | 212 | VAVEYLDPSPEVQKK       | R | K | 1,701.91 |
| 3611 | ENO1 Isoform alpha-enolase of Alpha-enolase                            | IPI00465248                         | 47,152.20 | 203 | 228 | ALLEVLGR              | K | L | 870.5408 |
| 3612 | ENO1 Isoform alpha-enolase of Alpha-enolase                            | IPI00465248                         | 47,152.20 | 203 | 228 | IINDNATYCR            | K | L | 1,239.58 |
|      |                                                                        |                                     |           |     |     | KPLVLCGDLNVAHEEIDLR   | R | N | 2,191.15 |
|      |                                                                        |                                     |           |     |     | FTMVQVWPVR            | K | Q | 1,262.67 |
|      |                                                                        |                                     |           |     |     | DATNVGDEGGFAPNILENKEG | K | T | 2,743.38 |
|      |                                                                        |                                     |           |     |     | LELLK                 |   |   |          |
|      |                                                                        |                                     |           |     |     | DATNVGDEGGFAPNILENKEG | K | T | 2,743.38 |
|      |                                                                        |                                     |           |     |     | LELLK                 |   |   |          |

|      |                                                                               |                                     |            |     |     |                                    |   |          |
|------|-------------------------------------------------------------------------------|-------------------------------------|------------|-----|-----|------------------------------------|---|----------|
| 3613 | ENO1 Isoform alpha-enolase of Alpha-enolase                                   | IPI00465248                         | 47,152.20  | 203 | 228 | DATNVGDEGGFAPNILENKEG K<br>LELLK   | T | 2,743.38 |
| 3614 | RACGAP1 Rac GTPase-activating protein 1                                       | IPI00152946                         | 71,009.80  | 203 | 218 | SIGSAVDQGNESIVAK                   | R | 1,574.80 |
| 3615 | RPL10 60S ribosomal protein L10                                               | IPI00554723,IPI00646899,IPI00853161 | 24,586.60  | 204 | 210 | GPLDKWR                            | R | 871.4786 |
| 3616 | RNPS1 Isoform 1 of RNA-binding protein with serine-rich domain 1              | IPI00033561,IPI00479871,IPI00783594 | 34,191.60  | 204 | 218 | GYAYVEFENPDEAEK                    | K | 1,760.77 |
| 3617 | TSN Translin                                                                  | IPI00018768,IPI00917623             | 26,165.40  | 204 | 215 | KVEEVVYDLSIR                       | K | 1,449.79 |
| 3618 | DTWD2 DTW domain-containing protein 2                                         | IPI00168209                         | 33,398.60  | 204 | 213 | TSISSQYVIR                         | K | 1,153.62 |
| 3619 | TCP1 T-complex protein 1 subunit alpha                                        | IPI00290566                         | 60,327.20  | 204 | 227 | SQMESMLISGYALNCVVGSQ<br>GMPK       | R | 2,619.19 |
| 3620 | MDH2 Malate dehydrogenase, mitochondrial                                      | IPI00291006                         | 35,485.70  | 204 | 215 | TIIP LISQCTPK                      | K | 1,370.77 |
| 3621 | PSMB1 Proteasome subunit beta type-1                                          | IPI00025019                         | 26,472.50  | 205 | 213 | DVFISAAER                          | K | 1,007.52 |
| 3622 | HSP90AB1 Heat shock protein HSP 90-beta                                       | IPI00414676                         | 83,249.30  | 205 | 219 | HSQFIGYPITLYLEK                    | K | 1,808.96 |
| 3623 | HSP90AB1 Heat shock protein HSP 90-beta                                       | IPI00414676                         | 83,249.30  | 205 | 221 | HSQFIGYPITLYLEKER                  | K | 2,094.10 |
| 3624 | DNAJC7 DnaJ homolog subfamily C member 7                                      | IPI00329629                         | 56,424.90  | 205 | 216 | MDSTNADALYVR                       | R | 1,355.63 |
| 3625 | BCAP31 B-cell receptor-associated protein 31                                  | IPI00218200,IPI00642984             | 27,974.60  | 205 | 213 | AENQVLAMR                          | K | 1,031.53 |
| 3626 | BCAP31 B-cell receptor-associated protein 31                                  | IPI00218200,IPI00642984             | 27,974.60  | 205 | 213 | AENQVLAMR                          | K | 1,031.53 |
| 3627 | ACTN4 Alpha-actinin-4                                                         | IPI00013808                         | 104,839.20 | 205 | 216 | HRPELIEYDKLR                       | R | 1,568.85 |
| 3628 | GNB2L1 38 kDa protein                                                         | IPI00641950,IPI00848226             | 37,740.10  | 205 | 212 | VWNLANCK                           | K | 1,004.50 |
| 3629 | YBX1 Nuclease-sensitive element-binding protein 1                             | IPI00031812,IPI00643351             | 35,905.70  | 205 | 234 | RPQYSNPPVQGEVMEGADN<br>QGAGEQGRPVR | R | 3,223.53 |
| 3630 | PSMA7 Isoform 1 of Proteasome subunit alpha type-7                            | IPI00024175                         | 27,869.10  | 205 | 212 | NIELAVMR                           | K | 961.5136 |
| 3631 | PSMD7 26S proteasome non-ATPase regulatory subunit 7                          | IPI00019927                         | 37,007.50  | 205 | 209 | LLDIR                              | K | 629.3982 |
| 3632 | PRPS1 Ribose-phosphate pyrophosphokinase 1                                    | IPI00219616,IPI00917169             | 34,816.70  | 205 | 214 | MVLVGDKVDR                         | R | 1,131.62 |
| 3633 | ATP2A2 Isoform SERCA2A of Sarcoplasmic/endoplasmic reticulum calcium ATPase 2 | IPI00177817,IPI00219078,IPI00747443 | 109,674.90 | 206 | 218 | NMLFSGTNIAGK                       | K | 1,339.67 |
| 3634 | C14orf166 UPF0568 protein C14orf166                                           | IPI00006980                         | 28,051.30  | 206 | 213 | LLHIEELR                           | R | 1,022.60 |
| 3635 | MDH1 Malate dehydrogenase, cytoplasmic                                        | IPI00291005,IPI00915869             | 36,408.90  | 206 | 230 | EVGVYEALKDDSWLKGEFVT<br>TVQQR      | K | 2,897.47 |
| 3636 | DNAJA1 DnaJ homolog subfamily A member 1                                      | IPI00012535                         | 44,850.60  | 206 | 214 | KILEVHIDK                          | K | 1,094.66 |
| 3637 | SNRPA1 U2 small nuclear ribonucleoprotein A'                                  | IPI00297477                         | 28,399.10  | 206 | 219 | NAIANASTLAEVER                     | K | 1,458.75 |
| 3638 | CTPS2 CTP synthase 2                                                          | IPI00645702                         | 65,661.40  | 206 | 217 | GLGLSPDLIVCR                       | R | 1,299.71 |
| 3639 | OCIAD1 Isoform 1 of OCIA domain-containing protein 1                          | IPI00016405                         | 27,608.80  | 206 | 217 | NRESYEVSLTQK                       | K | 1,453.73 |
| 3640 | KDELRL2 ER lumen protein retaining receptor 2                                 | IPI00018248,IPI00028116             | 24,405.70  | 207 | 212 | KLSLPA                             | K | 628.4029 |
| 3641 | CCDC124 Coiled-coil domain-containing protein 124                             | IPI00060627                         | 25,817.70  | 207 | 215 | SPDNPMNQR                          | R | 1,074.46 |
| 3642 | XRCC6 ATP-dependent DNA helicase 2 subunit 1                                  | IPI00644712                         | 69,828.40  | 207 | 218 | KPGGFDISLFYR                       | K | 1,399.74 |
| 3643 | CKAP4 Isoform 1 of Cytoskeleton-associated protein 4                          | IPI00141318,IPI00604713             | 66,004.20  | 207 | 223 | LQNEILKDLSDGIHVVK                  | K | 1,921.08 |
| 3644 | HNRNPR heterogeneous nuclear ribonucleoprotein R isoform 1                    | IPI00644055                         | 71,197.20  | 207 | 216 | GYAFITFCGK                         | R | 1,163.56 |
| 3645 | HNRNPR heterogeneous nuclear ribonucleoprotein R isoform 1                    | IPI00644055                         | 71,197.20  | 207 | 216 | GYAFITFCGK                         | R | 1,163.56 |
| 3646 | PKM2 Isoform M1 of Pyruvate kinase isozymes M1/M2                             | IPI00220644,IPI00479186             | 58,044.60  | 207 | 230 | KGVNLPGAADVLPVSEKDIQ<br>DLK        | K | 2,477.36 |
| 3647 | HNRNPA1 Isoform A1-B of Heterogeneous nuclear ribonucleoprotein A1            | IPI00215965,IPI00465365             | 38,828.10  | 207 | 218 | GGGFGGNDNFGR                       | R | 1,154.50 |
| 3648 | PSMD10 26S proteasome non-ATPase regulatory subunit 10                        | IPI00003565,IPI00027699             | 24,410.20  | 207 | 213 | TPLQVAK                            | K | 756.4615 |
| 3649 | KPNB1 Importin subunit beta-1                                                 | IPI00001639                         | 97,153.30  | 207 | 215 | ANFDKESER                          | K | 1,095.51 |
| 3650 | CDC2 Putative uncharacterized protein DKFZp686L20222                          | IPI00026689                         | 34,762.10  | 207 | 221 | KPLFHGDSEIDQLFR                    | K | 1,801.92 |
| 3651 | CDC2 Putative uncharacterized protein DKFZp686L20222                          | IPI00026689                         | 34,762.10  | 207 | 221 | KPLFHGDSEIDQLFR                    | K | 1,801.92 |

|      |                                                                                 |                                                 |           |     |     |                       |   |   |          |
|------|---------------------------------------------------------------------------------|-------------------------------------------------|-----------|-----|-----|-----------------------|---|---|----------|
| 3652 | PAFAH1B3 Platelet-activating factor acetylhydrolase IB subunit gamma            | IPI00014808                                     | 25,715.60 | 207 | 214 | ALHSLLLR              | R | L | 922.5833 |
| 3653 | GTF2E2 Transcription initiation factor IIE subunit beta                         | IPI00019981                                     | 33,027.00 | 207 | 218 | SCQFSVDEEFQK          | K | L | 1,503.64 |
| 3654 | RDH11 Isoform 1 of Retinol dehydrogenase 11                                     | IPI00339384                                     | 35,368.50 | 207 | 218 | LANILFTQELAR          | K | R | 1,388.79 |
| 3655 | HNRNPK Isoform 1 of Heterogeneous nuclear ribonucleoprotein K                   | IPI00216049,IPI00216746,IPI00807545,IPI00910458 | 50,960.50 | 208 | 221 | IILDLISESPIKGR        | K | A | 1,553.93 |
| 3656 | HNRNPK Isoform 1 of Heterogeneous nuclear ribonucleoprotein K                   | IPI00216049,IPI00216746,IPI00807545,IPI00910458 | 50,960.50 | 208 | 221 | IILDLISESPIKGR        | K | A | 1,553.93 |
| 3657 | ARL8B cDNA FLJ56285, highly similar to ADP-ribosylation factor-like protein 8B  | IPI00018871                                     | 27,235.70 | 208 | 217 | EICCYSISCK            | R | E | 1,319.54 |
| 3658 | CLINT1 Isoform 1 of Clathrin interactor 1                                       | IPI00291930                                     | 68,242.50 | 208 | 218 | IGSTIDDTISK           | K | F | 1,149.60 |
| 3659 | RBMS1 Isoform 2 of RNA-binding motif, single-stranded-interacting protein 1     | IPI00033611,IPI00102991,IPI00237654,IPI00477694 | 44,119.00 | 208 | 222 | TPPGVSAPTEPLLCK       | K | F | 1,566.82 |
| 3660 | MCM6 DNA replication licensing factor MCM6                                      | IPI00031517                                     | 92,872.60 | 208 | 217 | IQETQAEPLR            | R | G | 1,184.63 |
| 3661 | FBL rRNA 2'-O-methyltransferase fibrillarin                                     | IPI00025039                                     | 33,766.10 | 208 | 218 | TNIIPVIEDAR           | R | H | 1,240.69 |
| 3662 | UGDH UDP-glucose 6-dehydrogenase                                                | IPI00031420                                     | 55,007.30 | 208 | 220 | ILTTNTWSSELSK         | K | L | 1,479.77 |
| 3663 | WDR82 WD repeat-containing protein 82                                           | IPI00152695                                     | 35,062.40 | 208 | 219 | LILISTNGSFIR          | K | L | 1,333.78 |
| 3664 | ATIC Bifunctional purine biosynthesis protein PURH                              | IPI00289499                                     | 64,598.50 | 208 | 225 | YGMNPHQTPAQLYTLQPK    | R | L | 2,103.03 |
| 3665 | C21orf70 Isoform A of Uncharacterized protein C21orf70                          | IPI00027898,IPI00217294                         | 25,438.70 | 208 | 220 | ASPLVAIGQTLAR         | R | Q | 1,296.76 |
| 3666 | NDFIP2 NEDD4 family-interacting protein 2                                       | IPI00385038,IPI00910797,IPI00911105             | 36,372.50 | 208 | 226 | IQEEECPPRDDFSDADQLR   | R | V | 2,320.02 |
| 3667 | RCC1 regulator of chromosome condensation 1 isoform a                           | IPI00001661,IPI00747309,IPI00787306             | 48,126.30 | 208 | 237 | VASGNDHLVMLTADGDLYTLG | K | V | 3,147.48 |
| 3668 | GNPDA1 Glucosamine-6-phosphate isomerase 1                                      | IPI00009305                                     | 32,651.40 | 209 | 214 | CFEQGQLGR             | K | A | 712.4028 |
| 3669 | TFRC Transferrin receptor protein 1                                             | IPI00022462                                     | 84,855.60 | 209 | 224 | LVYLVENPGGYVAYSK      | R | A | 1,771.93 |
| 3670 | ALDOC Fructose-bisphosphate aldolase C                                          | IPI00418262                                     | 39,438.20 | 209 | 215 | VLAAYYK               | K | A | 763.4712 |
| 3671 | ALDOA Fructose-bisphosphate aldolase A                                          | IPI00465439                                     | 39,402.60 | 209 | 215 | VLAAYYK               | K | A | 763.4712 |
| 3672 | RRM2 Ribonucleoside-diphosphate reductase M2 subunit                            | IPI00011118                                     | 51,076.50 | 209 | 219 | FSQEVQITEAR           | R | C | 1,307.66 |
| 3673 | ZC3H15 Similar to DRG family regulatory protein 1                               | IPI00000279                                     | 49,126.30 | 209 | 219 | HALPPGFVLKK           | R | D | 1,206.74 |
| 3674 | CLIC1 Chloride intracellular channel protein 1                                  | IPI00010896                                     | 26,905.30 | 209 | 216 | YLSNAYAR              | R | E | 957.4787 |
| 3675 | CCT6A T-complex protein 1 subunit zeta                                          | IPI00027626,IPI00552590                         | 58,007.30 | 209 | 217 | GLVLDHGAR             | R | H | 937.5215 |
| 3676 | FAR1 Fatty acyl-CoA reductase 1                                                 | IPI00478838                                     | 59,340.20 | 209 | 221 | ALAEYVVQQEGAK         | K | L | 1,405.73 |
| 3677 | TCEA1 Isoform 1 of Transcription elongation factor A protein 1                  | IPI00333215                                     | 33,952.60 | 209 | 222 | NVLCGNIPDLFAR         | K | M | 1,585.82 |
| 3678 | CTTN Src substrate cortactin                                                    | IPI00029601                                     | 61,567.40 | 209 | 218 | SAVGFEYQGK            | K | T | 1,085.53 |
| 3679 | EIF2B1 Translation initiation factor eIF-2B subunit alpha                       | IPI00221300                                     | 33,695.20 | 210 | 220 | IGTNQMAVCAK           | K | A | 1,208.58 |
| 3680 | HSP90AA1 heat shock protein 90kDa alpha (cytosolic), class A member 1 isoform 1 | IPI00382470,IPI00784295                         | 98,147.10 | 210 | 222 | TLTIVDTGIGMTK         | R | A | 1,365.73 |
| 3681 | HSP90AA1 heat shock protein 90kDa alpha (cytosolic), class A member 1 isoform 1 | IPI00382470,IPI00784295                         | 98,147.10 | 210 | 222 | TLTIVDTGIGMTK         | R | A | 1,365.73 |
| 3682 | BLVRA Biliverdin reductase A                                                    | IPI00294158                                     | 33,411.00 | 210 | 219 | KSPLSWIEEK            | K | G | 1,216.66 |
| 3683 | TIAL1 TIA-1 related protein isoform 2                                           | IPI00644708                                     | 43,429.80 | 210 | 220 | FEDVVNQSSPK           | R | N | 1,249.61 |
| 3684 | PSMB6 Proteasome subunit beta type-6                                            | IPI00000811,IPI00789119                         | 25,339.90 | 210 | 220 | LAAIAESGVER           | R | Q | 1,115.61 |
| 3685 | FAM98B Protein FAM98B                                                           | IPI00167572,IPI00760837                         | 37,174.50 | 210 | 221 | INDALSCEYEER          | R | R | 1,529.64 |
| 3686 | DDX17 DEAD box polypeptide 17 isoform 1                                         | IPI00023785,IPI00651653                         | 80,256.00 | 210 | 221 | DMVGIAQTGSGK          | R | T | 1,179.57 |
| 3687 | C14orf149 Probable proline racemase                                             | IPI00386591                                     | 38,149.60 | 211 | 224 | DLVDAASAVTEAVK        | R | A | 1,388.73 |
| 3688 | NPM1 Isoform 2 of Nucleophosmin                                                 | IPI00220740,IPI00549248                         | 29,446.90 | 211 | 219 | GPSSVEDIK             | K | A | 931.4732 |
| 3689 | ADRM1 Proteasomal ubiquitin receptor ADRM1                                      | IPI00033030,IPI00470921                         | 42,136.20 | 211 | 226 | SQSAAVTPSSTTSSTR      | R | A | 1,567.76 |
| 3690 | PCNA Proliferating cell nuclear antigen                                         | IPI00021700                                     | 28,751.30 | 211 | 217 | YLNFFTK               | R | A | 932.4876 |
| 3691 | ST13 Hsc70-interacting protein                                                  | IPI00032826                                     | 41,314.40 | 211 | 222 | LDYDEDASAMLK          | K | E | 1,370.61 |
| 3692 | PFKP 6-phosphofructokinase type C                                               | IPI00009790                                     | 85,579.40 | 211 | 219 | TFVLEVMSGR            | R | H | 1,051.56 |
| 3693 | KIAA1715 Isoform 1 of Protein lunapark                                          | IPI00028369,IPI00784901,IPI00785171             | 47,722.90 | 211 | 223 | TVTPALSSNVLPRL        | R | H | 1,354.77 |
| 3694 | NPM1 Isoform 2 of Nucleophosmin                                                 | IPI00220740,IPI00549248                         | 29,446.90 | 211 | 221 | GPSSVEDIKAK           | K | M | 1,130.61 |

|      |                                                                                           |                                                             |            |     |     |                        |   |   |          |
|------|-------------------------------------------------------------------------------------------|-------------------------------------------------------------|------------|-----|-----|------------------------|---|---|----------|
| 3695 | PPP6C Serine/threonine-protein phosphatase 6 catalytic subunit                            | IPI00012970,IPI00890743,IPI00890827                         | 35,126.80  | 211 | 219 | GAGWLFQAK              | R | V | 906.4833 |
| 3696 | COMT Isoform Membrane-bound of Catechol O-methyltransferase                               | IPI00011284,IPI00375513                                     | 30,019.60  | 212 | 234 | KGTVLLADNVICPGAPDFLAH  | R | G | 2,463.32 |
| 3697 | SFPQ Isoform Long of Splicing factor, proline- and glutamine-rich                         | IPI00010740                                                 | 76,131.50  | 212 | 236 | MPGGPKPGGGPGLSTPGGH    | K | G | 2,386.22 |
| 3698 | EMD Emerin                                                                                | IPI00032003                                                 | 28,976.90  | 212 | 221 | PKPPHR                 | R | Q | 941.4801 |
| 3699 | EIF4G2 cDNA FLJ59571, highly similar to Eukaryotic translation initiation factor 4gamma 2 | IPI00015952                                                 | 110,247.70 | 212 | 231 | APGAGLGQDR             | R | Q | 2,011.94 |
| 3700 | NOSIP Nitric oxide synthase-interacting protein                                           | IPI00006408                                                 | 33,154.00  | 212 | 217 | LAEDAPNFDGFAAEGQPQK    | R | S | 658.4247 |
| 3701 | TXNL1 Thioredoxin-like protein 1                                                          | IPI00305692,IPI00642032                                     | 32,233.40  | 212 | 234 | VGLITR                 | R | Y | 2,568.30 |
| 3702 | DIS3 Isoform 2 of Exosome complex exonuclease RRP44                                       | IPI00183462,IPI00746351                                     | 105,025.50 | 213 | 222 | SEPTQALELTEDDIKEDGIVPL | R | A | 1,129.56 |
| 3703 | CDC7 Cell division cycle 7-related protein kinase                                         | IPI00448121                                                 | 63,871.70  | 213 | 222 | R                      | K | C | 1,221.59 |
| 3704 | YWHAQ 14-3-3 protein theta                                                                | IPI00018146                                                 | 27,747.40  | 213 | 222 | FVQSEAQKER             | K | D | 1,205.66 |
| 3705 | YWHAZ 14-3-3 protein zeta/delta                                                           | IPI00021263                                                 | 27,727.90  | 213 | 222 | DSTLIMQLLR             | K | D | 1,205.66 |
| 3706 | YWHAB Isoform Short of 14-3-3 protein beta/alpha                                          | IPI00759832                                                 | 27,832.80  | 213 | 222 | DSTLIMQLLR             | K | D | 1,205.66 |
| 3707 | GNL2 Nucleolar GTP-binding protein 2                                                      | IPI00015808                                                 | 83,638.00  | 213 | 227 | VIDSSDVVVQVLDAR        | K | D | 1,614.87 |
| 3708 | CD2BP2 CD2 antigen cytoplasmic tail-binding protein 2                                     | IPI00006103                                                 | 37,629.20  | 213 | 222 | GNLGVYQETR             | R | E | 1,136.57 |
| 3709 | ABCE1 ATP-binding cassette sub-family E member 1                                          | IPI00303207                                                 | 67,298.40  | 213 | 224 | NVEDLSGGELQR           | R | F | 1,316.64 |
| 3710 | TPI1 Isoform 1 of Triosephosphate isomerase                                               | IPI00465028                                                 | 30,772.80  | 213 | 225 | TATPQQAQEVHEK          | K | L | 1,466.72 |
| 3711 | SLC2A1 Solute carrier family 2, facilitated glucose transporter member 1                  | IPI00220194,IPI00872375,IPI00909237                         | 54,067.30  | 213 | 218 | FLLINR                 | R | N | 775.4825 |
| 3712 | ATP1A1 Isoform Long of Sodium/potassium-transporting ATPase subunit alpha-1               | IPI00006482,IPI00646182                                     | 112,881.50 | 213 | 227 | VDNSSLTGESEPQTR        | K | S | 1,619.75 |
| 3713 | ATP6V1A V-type proton ATPase catalytic subunit A                                          | IPI00007682                                                 | 68,287.40  | 213 | 232 | QVRPVTEKLPANHPLLTGQR   | R | V | 2,254.28 |
| 3714 | UCHL1 Ubiquitin carboxyl-terminal hydrolase isozyme L1                                    | IPI00018352                                                 | 24,806.30  | 214 | 221 | FSAVALCK               | R | A | 895.4706 |
| 3715 | DFFA Isoform DFF45 of DNA fragmentation factor subunit alpha (Fragment)                   | IPI00010882                                                 | 36,504.50  | 214 | 229 | AAFGEVDAVDTGISR        | K | E | 1,636.78 |
| 3716 | HNRNPA2B1 43 kDa protein                                                                  | IPI00874030                                                 | 43,234.30  | 214 | 229 | RGFGFVTFDDHDPVVK       | K | I | 1,851.87 |
| 3717 | - cDNA FLJ52712, highly similar to Tubulin beta-6 chain                                   | IPI00908469                                                 | 46,683.90  | 214 | 223 | FPGQLNADLR             | R | K | 1,130.60 |
| 3718 | - cDNA FLJ52712, highly similar to Tubulin beta-6 chain                                   | IPI00908469                                                 | 46,683.90  | 214 | 224 | FPGQLNADLRK            | R | L | 1,258.69 |
| 3719 | PEX11B Peroxisomal membrane protein 11B                                                   | IPI00021978                                                 | 28,414.50  | 214 | 224 | NACDLFIPLDK            | R | L | 1,305.65 |
| 3720 | PSMD10 26S proteasome non-ATPase regulatory subunit 10                                    | IPI00003565,IPI00027699                                     | 24,410.20  | 214 | 222 | GGLGLILKR              | K | M | 926.6148 |
| 3721 | PSMD10 26S proteasome non-ATPase regulatory subunit 10                                    | IPI00003565,IPI00027699                                     | 24,410.20  | 214 | 221 | GGLGLILK               | K | R | 770.5137 |
| 3722 | SF3A2 SF3A2 protein (Fragment)                                                            | IPI00017341                                                 | 51,457.10  | 214 | 231 | MEKPPAPPSLPAGPPGVK     | K | R | 1,769.96 |
| 3723 | PABPC1 Isoform 1 of Polyadenylate-binding protein 1                                       | IPI00008524                                                 | 70,653.30  | 214 | 221 | FGPALSVK               | K | V | 818.4771 |
| 3724 | PAFAH1B3 Platelet-activating factor acetylhydrolase IB subunit gamma                      | IPI00014808                                                 | 25,715.60  | 215 | 231 | LLAQDQGGGAPLLEPAP      | R | - | 1,717.91 |
| 3725 | GNB2L1 38 kDa protein                                                                     | IPI00641950,IPI00848226                                     | 37,740.10  | 215 | 241 | TNHIGHTGYLNTVTVSPDGSL  | K | D | 2,743.31 |
| 3726 | RPS3 40S ribosomal protein S3                                                             | IPI00011253                                                 | 26,670.50  | 215 | 227 | CASGGK                 | K | G | 1,470.77 |
| 3727 | HNRNPU heterogeneous nuclear ribonucleoprotein U isoform a                                | IPI00644079                                                 | 90,567.20  | 215 | 238 | DEILPTTPISEQK          | K | G | 2,153.07 |
| 3728 | AHCY Adenosylhomocysteinase                                                               | IPI00012007                                                 | 47,699.10  | 215 | 226 | KAEGGGGGRRPGAPAAGDG    | K | G | 1,134.62 |
| 3729 | HNRNPA2B1 43 kDa protein                                                                  | IPI00874030                                                 | 43,234.30  | 215 | 229 | KTEQK                  | K | I | 1,695.77 |
| 3730 | BZW1 Isoform 2 of Basic leucine zipper and W2 domain-containing protein 1                 | IPI00180128,IPI00785096,IPI00916112,IPI00916503,IPI00918019 | 40,522.00  | 215 | 223 | VAVVAGYGDVVK           | R | Q | 1,062.57 |
| 3731 | ATG3 Isoform 1 of Autophagy-related protein 3                                             | IPI00022254                                                 | 35,846.20  | 215 | 224 | GFGFVTFDDHDPVVK        | R | Q | 1,326.65 |
| 3732 | HNRNPA2B1 43 kDa protein                                                                  | IPI00874030                                                 | 43,234.30  | 215 | 234 | LMELFPANK              | R | Y | 2,277.16 |
| 3733 | TSN Translin                                                                              | IPI00018768,IPI00917623                                     | 26,165.40  | 216 | 228 | LWLFYDEQR              | R | - | 1,424.68 |

|      |                                                                                         |                                     |            |     |     |                               |   |   |          |
|------|-----------------------------------------------------------------------------------------|-------------------------------------|------------|-----|-----|-------------------------------|---|---|----------|
| 3734 | YWHAE 14-3-3 protein epsilon                                                            | IPI00000816                         | 29,157.00  | 216 | 225 | DSTLIMQLLR                    | K | D | 1,205.66 |
| 3735 | NP cDNA FLJ25678 fis, clone TST04067, highly similar to PURINE NUCLEOSIDE PHOSPHORYLASE | IPI00017672,IPI00871140             | 32,533.50  | 216 | 233 | LGADAVGMSTVPEVIVAR            | K | H | 1,784.96 |
| 3736 | DDX42 Isoform 1 of ATP-dependent RNA helicase DDX42                                     | IPI00409671,IPI00829889             | 102,958.90 | 216 | 236 | NFYNEHEEITNLTPQQLIDLR         | K | H | 2,587.28 |
| 3737 | MDH2 Malate dehydrogenase, mitochondrial                                                | IPI00291006                         | 35,485.70  | 216 | 229 | VDFPQDQLTALTGR                | K | I | 1,560.80 |
| 3738 | TUBA1A Tubulin alpha-1A chain                                                           | IPI00180675                         | 50,117.70  | 216 | 229 | NLDIERPTYTNLNR                | R | L | 1,718.88 |
| 3739 | CCT3 chaperonin containing TCP1, subunit 3 isoform b                                    | IPI00290770,IPI00553185             | 60,446.30  | 216 | 227 | GVMINKDVTHPR                  | R | M | 1,382.72 |
| 3740 | CCT3 chaperonin containing TCP1, subunit 3 isoform b                                    | IPI00290770,IPI00553185             | 60,446.30  | 216 | 227 | GVMINKDVTHPR                  | R | M | 1,366.73 |
| 3741 | PDCD6IP PDCD6IP protein                                                                 | IPI00246058                         | 96,802.50  | 216 | 229 | LANQAADYFGDAFK                | K | Q | 1,530.72 |
| 3742 | BZW2 Basic leucine zipper and W2 domain-containing protein 2                            | IPI00022305,IPI00894416             | 48,146.00  | 216 | 224 | LLELFPVNR                     | R | Q | 1,100.65 |
| 3743 | CNP Isoform CNPI of 2',3'-cyclic-nucleotide 3'-phosphodiesterase                        | IPI00220993,IPI00306667             | 45,082.30  | 216 | 224 | MDLVTYFGK                     | K | R | 1,073.53 |
| 3744 | CAPZB Isoform 2 of F-actin-capping protein subunit beta                                 | IPI00642256                         | 30,611.70  | 216 | 225 | LVEDMENKIR                    | R | S | 1,246.65 |
| 3745 | RFC5 Replication factor C subunit 5                                                     | IPI00031514,IPI00373883             | 38,480.40  | 216 | 229 | ALNILQSTNMAFGK                | R | V | 1,523.79 |
| 3746 | YEATS4 YEATS domain-containing protein 4                                                | IPI00008536                         | 26,482.30  | 217 | 227 | KLEEDDQAKDI                   | R | - | 1,303.64 |
| 3747 | SEC23A Protein transport protein Sec23A                                                 | IPI00017375                         | 86,144.60  | 217 | 228 | GPQVQQPPPSNR                  | R | F | 1,304.67 |
| 3748 | TUBB2C Tubulin beta-2C chain                                                            | IPI00007752                         | 49,812.70  | 217 | 241 | LTTPTYGDLNHLVSATMSGVT         | K | F | 2,708.34 |
| 3749 | TUBB2C Tubulin beta-2C chain                                                            | IPI00007752                         | 49,812.70  | 217 | 241 | TCLR<br>LTTPTYGDLNHLVSATMSGVT | K | F | 2,708.34 |
| 3750 | TUBB Tubulin beta chain                                                                 | IPI00011654                         | 49,652.60  | 217 | 241 | TCLR<br>LTTPTYGDLNHLVSATMSGVT | K | F | 2,708.34 |
| 3751 | TUBB Tubulin beta chain                                                                 | IPI00011654                         | 49,652.60  | 217 | 241 | TCLR<br>LTTPTYGDLNHLVSATMSGVT | K | F | 2,708.34 |
| 3752 | TUBB2A Tubulin beta-2A chain                                                            | IPI00013475,IPI00031370             | 49,889.10  | 217 | 241 | TCLR<br>LTTPTYGDLNHLVSATMSGVT | K | F | 2,708.34 |
| 3753 | TUBB2A Tubulin beta-2A chain                                                            | IPI00013475,IPI00031370             | 49,889.10  | 217 | 241 | TCLR<br>LTTPTYGDLNHLVSATMSGVT | K | F | 2,708.34 |
| 3754 | MBD3 Isoform 1 of Methyl-CpG-binding domain protein 3                                   | IPI00439194,IPI00439195             | 32,826.30  | 217 | 226 | TCLR<br>AFMVTDEDIR            | K | K | 1,212.56 |
| 3755 | DDX5 Probable ATP-dependent RNA helicase DDX5                                           | IPI00017617                         | 69,131.70  | 217 | 227 | GVEICATPGR                    | R | L | 1,172.61 |
| 3756 | EIF2S2 Eukaryotic translation initiation factor 2 subunit 2                             | IPI00021728                         | 38,371.70  | 217 | 227 | TSFVNFTDICK                   | K | L | 1,331.63 |
| 3757 | RBM15 Isoform 1 of Putative RNA-binding protein 15                                      | IPI00102752,IPI00220716,IPI00220717 | 107,175.00 | 217 | 223 | VAFVNFR                       | R | R | 852.4725 |
| 3758 | PSMD3 26S proteasome non-ATPase regulatory subunit 3                                    | IPI00011603                         | 60,961.60  | 217 | 228 | VYEFDKLDVVR                   | R | S | 1,495.82 |
| 3759 | RNH1 Ribonuclease inhibitor                                                             | IPI00550069                         | 49,956.40  | 218 | 226 | DLCGIVASK                     | R | A | 962.4977 |
| 3760 | YWHAH 14-3-3 protein eta                                                                | IPI00216319                         | 28,201.60  | 218 | 227 | DSTLIMQLLR                    | K | D | 1,205.66 |
| 3761 | YWHAG 14-3-3 protein gamma                                                              | IPI00220642                         | 28,285.10  | 218 | 227 | DSTLIMQLLR                    | K | D | 1,205.66 |
| 3762 | PCNA Proliferating cell nuclear antigen                                                 | IPI00021700                         | 28,751.30  | 218 | 240 | ATPLSSTVTLSMSADVPLVVE         | K | I | 2,424.26 |
| 3763 | TAF9B;LOC728198 Transcription initiation factor TFIID subunit 9B                        | IPI00642105                         | 27,604.50  | 218 | 240 | YK<br>NILITTNMVSSQNTANEANPLK  | K | K | 2,545.30 |
| 3764 | CDK5 Cell division protein kinase 5                                                     | IPI00023530                         | 33,287.80  | 218 | 232 | LLGTPTEEQWPSMTK               | R | L | 1,733.84 |
| 3765 | RPA2 Isoform 1 of Replication protein A 32 kDa subunit                                  | IPI00013939,IPI00646500,IPI00647667 | 29,228.70  | 218 | 231 | ACPRPEGLNFQDLK                | K | N | 1,644.82 |
| 3766 | RBM39 Isoform 1 of RNA-binding protein 39                                               | IPI00163505,IPI00215801             | 59,363.40  | 218 | 232 | VLGVPIIVQASQAEK               | R | N | 1,551.91 |
| 3767 | ATP2A2 Isoform SERCA2A of Sarcoplasmic/endoplasmic reticulum calcium ATPase 2           | IPI00177817,IPI00219078,IPI00747443 | 109,674.90 | 219 | 234 | AMGVVATGVNTEIGK               | K | I | 1,561.83 |
| 3768 | CCT7 T-complex protein 1 subunit eta                                                    | IPI00018465                         | 59,349.80  | 219 | 230 | TFSYAGFEMQPK                  | K | K | 1,405.65 |
| 3769 | C14orf166 UPF0568 protein C14orf166                                                     | IPI00006980                         | 28,051.30  | 219 | 238 | INEAIVAVQAIADPKTDHR           | K | L | 2,174.19 |



|      |                                                                         |                                                             |                  |            |            |                                |          |          |                 |
|------|-------------------------------------------------------------------------|-------------------------------------------------------------|------------------|------------|------------|--------------------------------|----------|----------|-----------------|
| 3770 | EEF1A1 Elongation factor 1-alpha 1                                      | IPI00396485                                                 | 50,123.20        | 219        | 247        | KDGNASGTTLLEALDCILPPT RPTDKPLR | R        | L        | 3,149.66        |
| 3771 | PTBP1 Isoform 1 of Polypyrimidine tract-binding protein 1               | IPI00179964,IPI00183626,IPI00334175                         | 57,204.50        | 219        | 238        | NNQFQALLQYADPVSAQHAK           | K        | L        | 2,243.12        |
| 3772 | PITPNB Isoform 1 of Phosphatidylinositol transfer protein beta isoform  | IPI00334907                                                 | 31,522.30        | 219        | 226        | RIFTNFHR                       | K        | Q        | 1,090.59        |
| 3773 | HNRNPF Heterogeneous nuclear ribonucleoprotein F                        | IPI00003881                                                 | 45,653.80        | 219        | 224        | YIGIVK                         | R        | Q        | 692.4342        |
| 3774 | DDX3X ATP-dependent RNA helicase DDX3X                                  | IPI00215637                                                 | 73,227.70        | 219        | 230        | DLMACAQTGSGK                   | R        | T        | 1,254.55        |
| 3775 | C14orf166 UPF0568 protein C14orf166                                     | IPI00006980                                                 | 28,051.30        | 219        | 234        | INEAIVAVQAIADPK                | K        | T        | 1,664.96        |
| 3776 | VDAC3 Isoform 1 of Voltage-dependent anion-selective channel protein 3  | IPI00031804,IPI00294779                                     | 30,641.90        | 219        | 224        | FGIAAK                         | R        | Y        | 606.361         |
| 3777 | VDAC1 Voltage-dependent anion-selective channel protein 1               | IPI00216308                                                 | 30,755.90        | 219        | 224        | FGIAAK                         | R        | Y        | 606.361         |
| 3778 | <b>TSN Translin</b>                                                     | <b>IPI00018768,IPI00917623</b>                              | <b>26,165.40</b> | <b>220</b> | <b>228</b> | <b>ETAAACVEK</b>               | <b>K</b> | <b>-</b> | <b>978.4561</b> |
| 3779 | UBXN1 Isoform 1 of UBX domain-containing protein 1                      | IPI00027378,IPI00396563                                     | 33,307.40        | 220        | 231        | LPDGTSLTQTFR                   | R        | A        | 1,335.69        |
| 3780 | ACTR2 Actin-related protein 2                                           | IPI00005159                                                 | 44,743.70        | 220        | 232        | LCYVGYNIEQEYK                  | K        | L        | 1,643.77        |
| 3781 | EEF1D Elongation factor 1-delta                                         | IPI00023048                                                 | 31,103.90        | 220        | 232        | SIQLDGLVWGASK                  | R        | L        | 1,373.74        |
| 3782 | GAPDH Glyceraldehyde-3-phosphate dehydrogenase                          | IPI00219018                                                 | 36,035.30        | 220        | 227        | VIPELNGK                       | K        | L        | 869.5092        |
| 3783 | PPP6C Serine/threonine-protein phosphatase 6 catalytic subunit          | IPI00012970,IPI00890743,IPI00890827                         | 35,126.80        | 220        | 231        | VTNEFVHINNLK                   | K        | L        | 1,427.76        |
| 3784 | WDR36 WD repeat-containing protein 36                                   | IPI00169325                                                 | 105,307.90       | 220        | 235        | ILLGSEQSLQLWNVK                | K        | S        | 1,784.99        |
| 3785 | HSDL2 Isoform 2 of Hydroxysteroid dehydrogenase-like protein 2          | IPI00031107,IPI00414384                                     | 45,378.60        | 220        | 236        | KVDIADAAYSIFQKPK               | R        | S        | 1,907.06        |
| 3786 | QKI Isoform 3 of Protein quaking                                        | IPI00736672,IPI00759828                                     | 36,908.70        | 220        | 234        | IITGPAVLPPAALR                 | R        | T        | 1,485.92        |
| 3787 | SEC13 Protein SEC13 homolog                                             | IPI00375370,IPI00479141,IPI00789169,IPI00789755,IPI00853598 | 35,838.00        | 220        | 242        | DVAWAPSIGLPTSTIASCSQD GR       | R        | V        | 2,389.15        |
| 3788 | RPA1 Replication protein A 70 kDa DNA-binding subunit                   | IPI00020127                                                 | 68,121.00        | 221        | 234        | LFSLLEVDSEGEIR                 | K        | A        | 1,606.83        |
| 3789 | EIF2B1 Translation initiation factor eIF-2B subunit alpha               | IPI00221300                                                 | 33,695.20        | 221        | 234        | AQNKPFYVVAESFK                 | K        | F        | 1,627.85        |
| 3790 | MDH1 Malate dehydrogenase, cytoplasmic                                  | IPI00291005,IPI00915869                                     | 36,408.90        | 221        | 230        | GEFVTTVQQR                     | K        | G        | 1,164.60        |
| 3791 | CDK6 Cell division protein kinase 6                                     | IPI00023529                                                 | 36,920.80        | 221        | 230        | GSSDQVQLGK                     | R        | I        | 1,005.48        |
| 3792 | HSPA1A;HSPA1B Heat shock 70 kDa protein 1                               | IPI00304925                                                 | 70,036.00        | 221        | 236        | ATAGDTHLGGEDFDNR               | K        | L        | 1,675.73        |
| 3793 | ACSL3 Long-chain-fatty-acid--CoA ligase 3                               | IPI000031397                                                | 80,405.10        | 221        | 230        | LKDIVSLVPR                     | K        | L        | 1,139.71        |
| 3794 | HSPA8 Isoform 1 of Heat shock cognate 71 kDa protein                    | IPI00003865                                                 | 70,881.80        | 221        | 236        | STAGDTHLGGEDFDNR               | K        | M        | 1,691.73        |
| 3795 | CBR1 Carbonyl reductase [NADPH] 1                                       | IPI00295386                                                 | 30,356.80        | 221        | 232        | ILLNACCPGWVR                   | K        | T        | 1,458.73        |
| 3796 | EHD1 EH domain-containing protein 1                                     | IPI00017184                                                 | 60,611.10        | 221        | 231        | ADQIETQQLMR                    | K        | V        | 1,348.65        |
| 3797 | ATP6V1A V-type proton ATPase catalytic subunit A                        | IPI00007682                                                 | 68,287.40        | 221        | 232        | LPANHPLLTGQR                   | K        | V        | 1,316.74        |
| 3798 | <b>NUDT21 Cleavage and polyadenylation specificity factor subunit 5</b> | <b>IPI00646917</b>                                          | <b>26,210.10</b> | <b>222</b> | <b>227</b> | <b>FNFIYN</b>                  | <b>R</b> | <b>-</b> | <b>817.3878</b> |
| 3799 | SNRPA1 U2 small nuclear ribonucleoprotein A'                            | IPI00297477                                                 | 28,399.10        | 222        | 232        | GLLQSGQIPGR                    | K        | E        | 1,125.64        |
| 3800 | RPS4X 40S ribosomal protein S4, X isoform                               | IPI00217030                                                 | 29,581.30        | 222        | 230        | LSNIFVIGK                      | R        | G        | 990.5983        |
| 3801 | NPM1 Isoform 2 of Nucleophosmin                                         | IPI00220740,IPI00549248                                     | 29,446.90        | 222        | 228        | MQASIEK                        | K        | G        | 822.4027        |
| 3802 | GEMIN4 Component of gems 4                                              | IPI00027717                                                 | 119,975.10       | 222        | 229        | GLTQIQSR                       | R        | I        | 902.5055        |
| 3803 | HSPA4 Heat shock 70 kDa protein 4                                       | IPI00002966                                                 | 94,313.90        | 222        | 234        | VLATAFDTTLGGR                  | K        | K        | 1,321.71        |
| 3804 | HSPA4L Heat shock 70 kDa protein 4L                                     | IPI00295485,IPI00828021                                     | 94,470.40        | 222        | 234        | VLATTFDPYLGGR                  | K        | N        | 1,409.74        |
| 3805 | HSPH1 Isoform Beta of Heat shock protein 105 kDa                        | IPI00218993,IPI00513743                                     | 92,099.00        | 222        | 234        | VLGTAFDPPFLGGK                 | K        | N        | 1,321.72        |
| 3806 | GOLIM4 Golgi integral membrane protein 4                                | IPI00004962                                                 | 81,859.50        | 222        | 235        | SALAAAQTQVAEYK                 | K        | Q        | 1,450.75        |
| 3807 | RNPS1 Isoform 1 of RNA-binding protein with serine-rich domain 1        | IPI00033561,IPI00479871,IPI00783594                         | 34,191.60        | 222        | 248        | HMDGGQIDGQEITATAVLAPW PRPPPR   | K        | R        | 2,926.46        |
| 3808 | RFC4 Replication factor C subunit 4                                     | IPI00017381,IPI00792595                                     | 39,664.50        | 222        | 232        | ISDEGIAYLVK                    | K        | V        | 1,207.66        |
| 3809 | NPM1 Isoform 2 of Nucleophosmin                                         | IPI00220740,IPI00549248                                     | 29,446.90        | 222        | 234        | MQASIEKGGSLPK                  | K        | V        | 1,361.71        |

|      |                                                                                              |                                                                                     |            |     |     |                            |   |   |          |
|------|----------------------------------------------------------------------------------------------|-------------------------------------------------------------------------------------|------------|-----|-----|----------------------------|---|---|----------|
| 3810 | AKR7A2 Aflatoxin B1 aldehyde reductase member 2                                              | IPI00305978                                                                         | 39,571.00  | 222 | 236 | FYAYNPLAGLLTGK             | R | Y | 1,584.84 |
| 3811 | YWHAQ 14-3-3 protein theta                                                                   | IPI00018146                                                                         | 27,747.40  | 223 | 245 | DNLTWTSDSAGEECDAAEG        | R | - | 2,454.98 |
| 3812 | YWHAZ 14-3-3 protein zeta/delta                                                              | IPI00021263                                                                         | 27,727.90  | 223 | 245 | AEN<br>DNLTWTSDTQGDEAEAGEG | R | - | 2,409.00 |
| 3813 | YWHAB Isoform Short of 14-3-3 protein beta/alpha                                             | IPI00759832                                                                         | 27,832.80  | 223 | 244 | GEN<br>DNLTWTSENQGDGEDAGEG | R | - | 2,350.95 |
| 3814 | HNRNPH3 Isoform 1 of Heterogeneous nuclear ribonucleoprotein H3                              | IPI00013877,IPI00216492                                                             | 36,909.60  | 223 | 232 | VHIDIGADGR                 | R | A | 1,052.55 |
| 3815 | VIM Vimentin                                                                                 | IPI00418471                                                                         | 53,634.60  | 223 | 236 | KVESLQEEIAFLKK             | R | L | 1,661.95 |
| 3816 | HSP90AA1 heat shock protein 90kDa alpha (cytosolic), class A member 1 isoform 1              | IPI00382470,IPI00784295                                                             | 98,147.10  | 223 | 234 | ADLINNLGTIAK               | K | S | 1,242.71 |
| 3817 | HSP90AA1 heat shock protein 90kDa alpha (cytosolic), class A member 1 isoform 1              | IPI00382470,IPI00784295                                                             | 98,147.10  | 223 | 234 | ADLINNLGTIAK               | K | S | 1,242.71 |
| 3818 | TARS Threonyl-tRNA synthetase, cytoplasmic                                                   | IPI00329633,IPI00908949                                                             | 83,419.80  | 223 | 231 | KETLLAMFK                  | K | Y | 1,080.61 |
| 3819 | RBM14;RBM4 Isoform 1 of RNA-binding protein 14                                               | IPI00013174                                                                         | 69,474.30  | 224 | 238 | ASYVAPLTAQPATYR            | R | A | 1,608.84 |
| 3820 | TOP1 DNA topoisomerase 1                                                                     | IPI00413611                                                                         | 90,711.70  | 224 | 239 | GPVFAPPYEPLPENVK           | K | F | 1,753.92 |
| 3821 | NOL7 Isoform 1 of Nucleolar protein 7                                                        | IPI00007729                                                                         | 29,408.90  | 224 | 237 | AAVQFLNNAWGIQK             | R | K | 1,559.83 |
| 3822 | ACAT2 Acetyl-CoA acetyltransferase, cytosolic                                                | IPI00291419                                                                         | 41,332.40  | 224 | 233 | HGSNIEAMSK                 | R | L | 1,073.50 |
| 3823 | - cDNA FLJ52712, highly similar to Tubulin beta-6 chain                                      | IPI00908469                                                                         | 46,683.90  | 224 | 234 | KLAVNMVPPFR                | R | L | 1,271.73 |
| 3824 | NARG1 Isoform 1 of NMDA receptor-regulated protein 1                                         | IPI00386189                                                                         | 101,259.90 | 224 | 239 | LAVEETKGELLLQLCR           | K | L | 1,872.03 |
| 3825 | RARS Isoform Complexed of Arginyl-tRNA synthetase, cytoplasmic                               | IPI00004860                                                                         | 75,364.00  | 224 | 234 | LFEFAGYDVLRL               | R | L | 1,329.68 |
| 3826 | RPL7 60S ribosomal protein L7                                                                | IPI00030179,IPI00472171,IPI00871827                                                 | 29,209.70  | 224 | 242 | TTFVVEGGDAGNREDQINR        | K | L | 2,115.98 |
| 3827 | HAX1 cDNA FLJ53021, highly similar to HS1-associating protein X-1                            | IPI00010440,IPI00641973                                                             | 32,443.00  | 224 | 234 | ITKPDGIVEER                | K | R | 1,256.68 |
| 3828 | MGMT O-6-methylguanine-DNA methyltransferase                                                 | IPI00028618                                                                         | 25,031.90  | 225 | 238 | GAGATSGSPPAGRNL            | K | - | 1,199.58 |
| 3829 | FASN Fatty acid synthase                                                                     | IPI00026781                                                                         | 273,382.00 | 225 | 235 | SEGVVAVLLTK                | R | K | 1,115.67 |
| 3830 | FASN Fatty acid synthase                                                                     | IPI00026781                                                                         | 273,382.00 | 225 | 235 | SEGVVAVLLTK                | R | K | 1,115.67 |
| 3831 | - cDNA FLJ52712, highly similar to Tubulin beta-6 chain                                      | IPI00908469                                                                         | 46,683.90  | 225 | 234 | LAVNMVPPFR                 | K | L | 1,159.63 |
| 3832 | PHB2 Prohibitin-2                                                                            | IPI00027252                                                                         | 33,279.60  | 225 | 236 | IVQAEGEAEAAK               | K | M | 1,215.62 |
| 3833 | CDC2 Putative uncharacterized protein DKFZp686L20222                                         | IPI00026689                                                                         | 34,762.10  | 225 | 244 | ALGTPNNEVWPEVESLQDYK       | R | N | 2,289.10 |
| 3834 | MED25 Isoform 4 of Mediator of RNA polymerase II transcription subunit 25                    | IPI00163419,IPI00418271,IPI00479592,IPI00744110,IPI00867552,IPI00867722,IPI00873857 | 84,370.90  | 225 | 242 | GLVLPVGGGSAPGLQSK          | R | Q | 1,633.93 |
| 3835 | ILF3 Isoform 1 of Interleukin enhancer-binding factor 3                                      | IPI00298788                                                                         | 95,320.90  | 225 | 231 | SCVIVIR                    | K | V | 846.4866 |
| 3836 | VDAC1 Voltage-dependent anion-selective channel protein 1                                    | IPI00216308                                                                         | 30,755.90  | 225 | 236 | YQIDPDACFSAK               | K | V | 1,414.63 |
| 3837 | CDC2 Putative uncharacterized protein DKFZp686L20222                                         | IPI00026689                                                                         | 34,762.10  | 225 | 249 | ALGTPNNEVWPEVESLQDYK       | R | W | 2,876.41 |
| 3838 | YWHAE 14-3-3 protein epsilon                                                                 | IPI00000816                                                                         | 29,157.00  | 226 | 255 | DNLTWTSMDMQGDGEEQNK        | R | - | 3,451.47 |
| 3839 | CAPZB Isoform 2 of F-actin-capping protein subunit beta                                      | IPI00642256                                                                         | 30,611.70  | 226 | 235 | EALQDVEDENQ<br>STLNEIYFGK  | R | T | 1,171.60 |
| 3840 | UBA1 Ubiquitin-like modifier-activating enzyme 1                                             | IPI00645078                                                                         | 117,832.30 | 227 | 239 | DNPGVVTCLDEAR              | K | H | 1,445.67 |
| 3841 | RP6-213H19.1 Serine/threonine-protein kinase MST4                                            | IPI00292827,IPI00760722,IPI00844141,IPI00872588,IPI00911046                         | 46,512.40  | 227 | 233 | VLFLIPK                    | R | N | 829.5547 |
| 3842 | RPN1 Dolichyl-diphosphooligosaccharide--protein glycosyltransferase 67 kDa subunit precursor | IPI00025874                                                                         | 72,762.00  | 227 | 232 | LGNPTR                     | K | S | 657.3679 |
| 3843 | NUP43 cDNA FLJ38675 fis, clone IMR322000243, highly similar to Nucleoporin Nup43             | IPI00171664,IPI00742943                                                             | 48,466.40  | 227 | 243 | TIDNADSSTLHAVTFLR          | R | T | 1,860.95 |
| 3844 | EIF2S1 Eukaryotic translation initiation factor 2 subunit 1                                  | IPI00219678                                                                         | 36,094.70  | 227 | 234 | INLIAPPR                   | K | Y | 893.5568 |
| 3845 | VPS35 Vacuolar protein sorting-associated protein 35                                         | IPI00018931                                                                         | 91,692.00  | 227 | 237 | LSQLEGVNVER                | R | Y | 1,243.66 |

|             |                                                                                           |                                                                                                                                                 |            |     |     |                                        |   |   |          |
|-------------|-------------------------------------------------------------------------------------------|-------------------------------------------------------------------------------------------------------------------------------------------------|------------|-----|-----|----------------------------------------|---|---|----------|
| <b>3846</b> | <b>YWHAG 14-3-3 protein gamma</b>                                                         | IP100220642                                                                                                                                     | 28,285.10  | 228 | 247 | DNLTLTWSDQQDDGGEGN<br>N                | R | - | 2,193.88 |
| <b>3847</b> | RPS2 40S ribosomal protein S2                                                             | IP100013485,IP100888294,IP100888474                                                                                                             | 31,307.20  | 228 | 238 | GCTATLGNFAK                            | R | A | 1,139.55 |
| <b>3848</b> | RPS3A 40S ribosomal protein S3a                                                           | IP100419880,IP100472119                                                                                                                         | 29,927.30  | 228 | 240 | LMELHGGEGSSSGK                         | K | A | 1,347.62 |
| <b>3849</b> | CAMK2D Isoform Delta 6 of Calcium/calmodulin-dependent protein kinase type II delta chain | IP100172636,IP100430291,IP100827573,IP100827625,IP100876923                                                                                     | 54,111.10  | 228 | 246 | AGAYDFPSPEWDTVTPPEAK                   | K | D | 2,080.95 |
| <b>3850</b> | STXBP1 Isoform 2 of Syntaxin-binding protein 1                                            | IP100046057,IP100084828                                                                                                                         | 68,720.90  | 228 | 235 | SQLLILDR                               | R | G | 957.5729 |
| <b>3851</b> | EIF3I Eukaryotic translation initiation factor 3 subunit I                                | IP100012795                                                                                                                                     | 36,484.00  | 228 | 261 | TERPVNSAALSPNYDHVVLG<br>GGQEAMDVTTTSTR | R | I | 3,589.72 |
| <b>3852</b> | GAPDH Glyceraldehyde-3-phosphate dehydrogenase                                            | IP100219018                                                                                                                                     | 36,035.30  | 228 | 248 | LTGMAFRVPTANVSVDLTCR                   | K | L | 2,307.19 |
| <b>3853</b> | CAMK2G Isoform 4 of Calcium/calmodulin-dependent protein kinase type II gamma chain       | IP100172450,IP100172452,IP100296678,IP100334344,IP100336118,IP100556423,IP100646849,IP100908444,IP100915309,IP100915327,IP100915383,IP100915393 | 59,589.60  | 228 | 246 | AGAYDFPSPEWDTVTPPEAK                   | K | N | 2,080.95 |
| <b>3854</b> | KPNA2;LOC728860 Importin subunit alpha-2                                                  | IP100002214,IP100789457                                                                                                                         | 57,844.50  | 228 | 238 | NLTWTLNLPCR                            | R | N | 1,377.69 |
| <b>3855</b> | ATP1A1 Isoform Long of Sodium/potassium-transporting ATPase subunit alpha-1               | IP100006482,IP100646182                                                                                                                         | 112,881.50 | 228 | 240 | SPDFTNENPLETR                          | R | N | 1,519.70 |
| <b>3856</b> | BLVRA Biliverdin reductase A                                                              | IP100294158                                                                                                                                     | 33,411.00  | 228 | 234 | YLSFHFK                                | R | S | 941.4879 |
| <b>3857</b> | DDX5 Probable ATP-dependent RNA helicase DDX5                                             | IP100017617                                                                                                                                     | 69,131.70  | 228 | 236 | LIDFLECGK                              | R | T | 1,094.56 |
| <b>3858</b> | DDX5 Probable ATP-dependent RNA helicase DDX5                                             | IP100017617                                                                                                                                     | 69,131.70  | 228 | 236 | LIDFLECGK                              | R | T | 1,094.56 |
| <b>3859</b> | <b>PSMA6 Proteasome subunit alpha type-6</b>                                              | IP100029623                                                                                                                                     | 27,381.50  | 229 | 246 | ILTEAEIDAHLVALAERD                     | R | - | 1,979.04 |
| <b>3860</b> | DNAJC7 DnaJ homolog subfamily C member 7                                                  | IP100329629                                                                                                                                     | 56,424.90  | 229 | 238 | AVQFFVQALR                             | K | M | 1,178.67 |
| <b>3861</b> | AOF2 Isoform 2 of Lysine-specific histone demethylase 1                                   | IP100217540,IP100456631                                                                                                                         | 95,137.70  | 229 | 234 | VFLFIR                                 | K | N | 794.4923 |
| <b>3862</b> | DDX24 ATP-dependent RNA helicase DDX24                                                    | IP100006987                                                                                                                                     | 96,316.70  | 229 | 243 | DKLDILGAAETGSGK                        | R | T | 1,474.78 |
| <b>3863</b> | GNL3L Guanine nucleotide-binding protein-like 3-like protein                              | IP100005132,IP100871959                                                                                                                         | 65,555.30  | 229 | 238 | ACFGAENLMR                             | K | V | 1,184.52 |
| <b>3864</b> | TUBA1A Tubulin alpha-1A chain                                                             | IP100180675                                                                                                                                     | 50,117.70  | 230 | 243 | LIGQIVSSITASLR                         | R | F | 1,457.87 |
| <b>3865</b> | TUBA1C Tubulin alpha-1C chain                                                             | IP100218343                                                                                                                                     | 49,877.40  | 230 | 243 | LISQIVSSITASLR                         | R | F | 1,487.88 |
| <b>3866</b> | TUBA1B Tubulin alpha-1B chain                                                             | IP100387144,IP100792677                                                                                                                         | 50,133.70  | 230 | 243 | LISQIVSSITASLR                         | R | F | 1,487.88 |
| <b>3867</b> | TUBA1B Tubulin alpha-1B chain                                                             | IP100387144,IP100792677                                                                                                                         | 50,133.70  | 230 | 243 | LISQIVSSITASLR                         | R | F | 1,487.88 |
| <b>3868</b> | CCT3 chaperonin containing TCP1, subunit 3 isoform b                                      | IP100290770,IP100553185                                                                                                                         | 60,446.30  | 230 | 236 | RYIKNPR                                | R | I | 946.5581 |
| <b>3869</b> | STIP1 Stress-induced-phosphoprotein 1                                                     | IP100013894,IP100871856                                                                                                                         | 62,624.10  | 230 | 237 | ELGNDAYK                               | K | K | 909.4313 |
| <b>3870</b> | G3BP1 Ras GTPase-activating protein-binding protein 1                                     | IP100012442                                                                                                                                     | 52,144.80  | 230 | 247 | SSSPADIAQTVQEDLR                       | K | T | 1,884.93 |
| <b>3871</b> | GNL3 Isoform 2 of Guanine nucleotide-binding protein-like 3                               | IP100003886,IP100306380                                                                                                                         | 60,527.60  | 231 | 241 | LLGGFQETCSK                            | K | A | 1,239.60 |
| <b>3872</b> | TLL12 Tubulin--tyrosine ligase-like protein 12                                            | IP100290448,IP100879002                                                                                                                         | 74,385.70  | 231 | 240 | DLDTGEEVTR                             | R | D | 1,134.53 |
| <b>3873</b> | KPNA1 Importin subunit alpha-1                                                            | IP100303292                                                                                                                                     | 60,232.00  | 231 | 241 | NAVWALSNLPCR                           | R | G | 1,303.66 |
| <b>3874</b> | PRDX4 Peroxiredoxin-4                                                                     | IP100011937,IP100639945                                                                                                                         | 30,523.10  | 231 | 240 | LVQAFQYTDK                             | R | H | 1,212.63 |
| <b>3875</b> | LTA4H Isoform 1 of Leukotriene A-4 hydrolase                                              | IP100219077                                                                                                                                     | 69,269.10  | 231 | 243 | SAYEFSETESMLK                          | K | I | 1,537.67 |
| <b>3876</b> | MMACHC Methylmalonic aciduria and homocystinuria type C protein                           | IP100001053                                                                                                                                     | 31,710.90  | 231 | 258 | LALLGLAQSEKPSPPDLP<br>FTTPAK           | R | K | 2,859.55 |
| <b>3877</b> | TALDO1 Transaldolase                                                                      | IP100744692                                                                                                                                     | 37,523.70  | 231 | 239 | TIVMGASFR                              | K | N | 997.5136 |
| <b>3878</b> | UROD Uroporphyrinogen decarboxylase                                                       | IP100301489,IP100514944                                                                                                                         | 40,769.20  | 232 | 238 | FALPYIR                                | K | D | 879.5087 |
| <b>3879</b> | PSMB4 Proteasome subunit beta type-4                                                      | IP100555956                                                                                                                                     | 29,187.00  | 232 | 240 | FQIATVTEK                              | R | G | 1,036.57 |
| <b>3880</b> | PABPC1 Isoform 1 of Polyadenylate-binding protein 1                                       | IP100008524                                                                                                                                     | 70,653.30  | 232 | 240 | GFGFVSFER                              | K | H | 1,045.51 |
| <b>3881</b> | TP11 Isoform 1 of Triosephosphate isomerase                                               | IP100465028                                                                                                                                     | 30,772.80  | 232 | 243 | SNVSDAVAQSTR                           | K | I | 1,234.60 |
| <b>3882</b> | TP11 Isoform 1 of Triosephosphate isomerase                                               | IP100465028                                                                                                                                     | 30,772.80  | 232 | 243 | SNVSDAVAQSTR                           | K | I | 1,234.60 |
| <b>3883</b> | TP11 Isoform 1 of Triosephosphate isomerase                                               | IP100465028                                                                                                                                     | 30,772.80  | 232 | 243 | SNVSDAVAQSTR                           | K | I | 1,234.60 |
| <b>3884</b> | EHD1 EH domain-containing protein 1                                                       | IP100017184                                                                                                                                     | 60,611.10  | 232 | 242 | VYGALMWSLGK                            | R | I | 1,224.64 |
| <b>3885</b> | EIF4E2 Eukaryotic translation initiation factor 4E type 2                                 | IP100744211,IP100915774                                                                                                                         | 28,344.70  | 232 | 241 | LLFQNLWKPR                             | R | L | 1,314.77 |
| <b>3886</b> | UROD Uroporphyrinogen decarboxylase                                                       | IP100301489,IP100514944                                                                                                                         | 40,769.20  | 232 | 242 | FALPYIRDVAK                            | K | Q | 1,292.74 |



|      |                                                                                              |                                                 |            |     |     |                                      |   |   |          |
|------|----------------------------------------------------------------------------------------------|-------------------------------------------------|------------|-----|-----|--------------------------------------|---|---|----------|
| 3887 | FLOT1 Flotillin-1                                                                            | IPI00027438                                     | 47,336.80  | 232 | 244 | AQADLAYQLQVAK                        | R | T | 1,418.76 |
| 3888 | BCAP31 B-cell receptor-associated protein 31                                                 | IPI00218200,IPI00642984                         | 27,974.60  | 233 | 246 | LQAAVDGPMDDKKEE                      | K | - | 1,546.74 |
| 3889 | HNRNP3 Isoform 1 of Heterogeneous nuclear ribonucleoprotein H3                               | IPI00013877,IPI00216492                         | 36,909.60  | 233 | 253 | ATGEADVFEVTHEDAVAAMS<br>K            | R | D | 2,194.00 |
| 3890 | RPN1 Dolichyl-diphosphooligosaccharide--protein glycosyltransferase 67 kDa subunit precursor | IPI00025874                                     | 72,762.00  | 233 | 243 | SEDLLLDYGPFR                         | R | D | 1,311.62 |
| 3891 | HNRNPAB Isoform 3 of Heterogeneous nuclear ribonucleoprotein A/B                             | IPI00334713                                     | 30,570.20  | 233 | 245 | EVYQQQQYGSQGR                        | K | G | 1,499.69 |
| 3892 | HNRNPAB Isoform 3 of Heterogeneous nuclear ribonucleoprotein A/B                             | IPI00334713                                     | 30,570.20  | 233 | 245 | EVYQQQQYGSQGR                        | K | G | 1,499.69 |
| 3893 | HNRNPM Isoform 1 of Heterogeneous nuclear ribonucleoprotein M                                | IPI00171903,IPI00383296                         | 77,499.30  | 233 | 242 | ADILEDKDGK                           | R | S | 1,103.56 |
| 3894 | SNRNP40 cDNA FLJ56825, highly similar to WD repeat protein 57                                | IPI00006723                                     | 44,498.40  | 233 | 260 | GHADSVTGLSLSSEGSYLLS<br>NAMDNTVR     | R | V | 2,897.36 |
| 3895 | AGPAT1 1-acyl-sn-glycerol-3-phosphate acyltransferase alpha                                  | IPI00019141,IPI00902608                         | 31,699.10  | 233 | 253 | VLPVPTEGLTPDDVPALADR                 | R | V | 2,172.16 |
| 3896 | CCT4 T-complex protein 1 subunit delta                                                       | IPI00302927,IPI00873222                         | 57,907.90  | 233 | 240 | VNSNGITR                             | K | V | 833.4475 |
| 3897 | SEH1L Isoform A of Nucleoporin SEH1-like                                                     | IPI00185533,IPI00220609                         | 39,630.00  | 234 | 243 | SFHILAIATK                           | R | D | 1,100.65 |
| 3898 | ELAVL1 cDNA FLJ60076, highly similar to ELAV-like protein 1                                  | IPI00301936                                     | 38,979.00  | 234 | 244 | FGGPPVHHQAQR                         | R | F | 1,233.62 |
| 3899 | PWP2 Periodic tryptophan protein 2 homolog                                                   | IPI00300078                                     | 102,436.00 | 234 | 258 | ADLLQREEEEEEEEDQEGDR<br>ETTIR        | K | G | 3,048.35 |
| 3900 | GATAD2A Isoform 1 of Transcriptional repressor p66-alpha                                     | IPI00410330,IPI00444526,IPI00478128             | 68,044.80  | 234 | 249 | LGPQASSQVVMPLVR                      | K | G | 1,694.93 |
| 3901 | KPNA6 cDNA FLJ53229, highly similar to Importin alpha-7 subunit                              | IPI00747764                                     | 60,563.50  | 234 | 244 | NAVWALSNLCR                          | R | G | 1,303.66 |
| 3902 | NT5C3 Isoform 3 of Cytosolic 5'-nucleotidase 3                                               | IPI00100192,IPI00619911,IPI00647805,IPI00807412 | 32,672.60  | 234 | 246 | MADGVANVEHILK                        | R | I | 1,412.72 |
| 3903 | ACAT2 Acetyl-CoA acetyltransferase, cytosolic                                                | IPI00291419                                     | 41,332.40  | 234 | 265 | LKPYFLTDGTGTVTPANASGI<br>NDGAAAVVLMK | K | K | 3,192.66 |
| 3904 | ACAT2 Acetyl-CoA acetyltransferase, cytosolic                                                | IPI00291419                                     | 41,332.40  | 234 | 265 | LKPYFLTDGTGTVTPANASGI<br>NDGAAAVVLMK | K | K | 3,192.66 |
| 3905 | PDE12 Isoform 1 of 2',5'-phosphodiesterase 12                                                | IPI00174390,IPI00886797                         | 67,333.70  | 234 | 245 | VYTPSNADIGLR                         | R | L | 1,305.68 |
| 3906 | RPL8 60S ribosomal protein L8                                                                | IPI00012772                                     | 28,006.80  | 234 | 241 | KVGLIAAR                             | R | R | 827.5462 |
| 3907 | ENO1 Isoform alpha-enolase of Alpha-enolase                                                  | IPI00465248                                     | 47,152.20  | 234 | 253 | AGYTDKVVIGMDVAASEFFR                 | K | S | 2,192.07 |
| 3908 | TCP1 T-complex protein 1 subunit alpha                                                       | IPI00290566                                     | 60,327.20  | 234 | 243 | IACLDLFLSK                           | K | T | 1,194.62 |
| 3909 | MAT2A S-adenosylmethionine synthetase isoform type-2                                         | IPI00010157                                     | 43,642.80  | 235 | 249 | YLDEDTIYHLQPSGR                      | K | F | 1,806.87 |
| 3910 | RBM39 Isoform 1 of RNA-binding protein 39                                                    | IPI00163505,IPI00215801                         | 59,363.40  | 235 | 244 | AAAMANNLQK                           | R | G | 1,047.53 |
| 3911 | - cDNA FLJ52712, highly similar to Tubulin beta-6 chain                                      | IPI00908469                                     | 46,683.90  | 235 | 248 | LHFFMPGFAPLTSR                       | R | G | 1,636.83 |
| 3912 | KPNB1 Importin subunit beta-1                                                                | IPI00001639                                     | 97,153.30  | 235 | 243 | VAALQNLVK                            | R | I | 955.5935 |
| 3913 | HSPA4 Heat shock 70 kDa protein 4                                                            | IPI00002966                                     | 94,313.90  | 235 | 250 | KFDEVLVNHFCEEFQK                     | R | K | 1,997.94 |
| 3914 | H2AFY H2A histone family, member Y isoform 2                                                 | IPI00059366,IPI00304171,IPI00744148             | 39,472.70  | 235 | 248 | KGGKEFVEAVLELR                       | K | K | 1,574.89 |
| 3915 | HNRNPA2B1 43 kDa protein                                                                     | IPI00874030                                     | 43,234.30  | 235 | 246 | YHTINGHNAEVR                         | K | K | 1,410.69 |
| 3916 | HNRNPA2B1 43 kDa protein                                                                     | IPI00874030                                     | 43,234.30  | 235 | 246 | YHTINGHNAEVR                         | K | K | 1,410.69 |
| 3917 | LCLAT1 Isoform 1 of Lysocardiolipin acyltransferase                                          | IPI00419643,IPI00456786,IPI00910254             | 48,904.20  | 235 | 244 | TTGFTFVVDNR                          | R | L | 1,142.58 |
| 3918 | GAPDH Glyceraldehyde-3-phosphate dehydrogenase                                               | IPI00219018                                     | 36,035.30  | 235 | 248 | VPTANVSVVDLTCR                       | R | L | 1,530.79 |
| 3919 | GAPDH Glyceraldehyde-3-phosphate dehydrogenase                                               | IPI00219018                                     | 36,035.30  | 235 | 248 | VPTANVSVVDLTCR                       | R | L | 1,530.79 |
| 3920 | GAPDH Glyceraldehyde-3-phosphate dehydrogenase                                               | IPI00219018                                     | 36,035.30  | 235 | 248 | VPTANVSVVDLTCR                       | R | L | 1,530.79 |
| 3921 | BLVRA Biliverdin reductase A                                                                 | IPI00294158                                     | 33,411.00  | 235 | 248 | SGSLEPNVNVGVNK                       | K | N | 1,413.73 |
| 3922 | RPL7A 60S ribosomal protein L7a                                                              | IPI00299573                                     | 29,978.30  | 235 | 245 | RHWGGNVLGPK                          | R | S | 1,220.66 |
| 3923 | GNPDA1 Glucosamine-6-phosphate isomerase 1                                                   | IPI00009305                                     | 32,651.40  | 235 | 248 | TVFVCDDEATLELK                       | R | V | 1,639.79 |
| 3924 | EHD4 EH domain-containing protein 4                                                          | IPI00005578                                     | 61,159.60  | 235 | 245 | VYGALMWSLQK                          | R | V | 1,224.64 |
| 3925 | GAPDH Glyceraldehyde-3-phosphate dehydrogenase                                               | IPI00219018                                     | 36,035.30  | 235 | 254 | VPTANVSVVDLTCRLEKPAK                 | R | Y | 2,197.20 |

|             |                                                                             |                                                 |            |     |     |                       |   |   |          |
|-------------|-----------------------------------------------------------------------------|-------------------------------------------------|------------|-----|-----|-----------------------|---|---|----------|
| <b>3926</b> | <b>OCIAD1 Isoform 1 of OCIA domain-containing protein 1</b>                 | IPI00016405                                     | 27,608.80  | 236 | 245 | VNKYGDTWDE            | K | - | 1,226.53 |
| <b>3927</b> | EEF2 Elongation factor 2                                                    | IPI00186290                                     | 95,322.10  | 236 | 249 | FAAKGEGQLGPAER        | K | A | 1,430.74 |
| <b>3928</b> | CAPNS1 Calpain small subunit 1                                              | IPI00025084                                     | 28,298.60  | 236 | 241 | LDAMFR                | R | A | 752.376  |
| <b>3929</b> | YRDC YrdC domain-containing protein, mitochondrial                          | IPI00384180                                     | 29,310.30  | 236 | 248 | LGSTVVDSLSPGK         | R | F | 1,271.72 |
| <b>3930</b> | PSAT1 cDNA FLJ56437, highly similar to Phosphoserine aminotransferase       | IPI00001734                                     | 45,338.10  | 236 | 245 | FGVIFAGAQK            | K | N | 1,037.58 |
| <b>3931</b> | PSAT1 cDNA FLJ56437, highly similar to Phosphoserine aminotransferase       | IPI00001734                                     | 45,338.10  | 236 | 245 | FGVIFAGAQK            | K | N | 1,037.58 |
| <b>3932</b> | PRPS1 Ribose-phosphate pyrophosphokinase 1                                  | IPI00219616,IPI00917169                         | 34,816.70  | 236 | 243 | LLSAGATR              | K | V | 788.4625 |
| <b>3933</b> | PHGDH D-3-phosphoglycerate dehydrogenase                                    | IPI00011200                                     | 56,632.60  | 237 | 247 | GGIVDEGALLR           | R | A | 1,099.61 |
| <b>3934</b> | HUS1 Checkpoint protein HUS1                                                | IPI00004712                                     | 31,673.50  | 237 | 250 | LLQFLAGQQVNPTK        | K | A | 1,556.88 |
| <b>3935</b> | CCT7 T-complex protein 1 subunit eta                                        | IPI00018465                                     | 59,349.80  | 237 | 250 | IALLNVELELKAEK        | K | D | 1,582.94 |
| <b>3936</b> | MBD3 Isoform 1 of Methyl-CpG-binding domain protein 3                       | IPI00439194,IPI00439195                         | 32,826.30  | 237 | 256 | KRLEEALMADMLAHVEELAR  | R | D | 2,357.20 |
| <b>3937</b> | AOF2 Isoform 2 of Lysine-specific histone demethylase 1                     | IPI00217540,IPI00456631                         | 95,137.70  | 237 | 246 | TLQLWLDNPK            | R | I | 1,227.67 |
| <b>3938</b> | CCT3 chaperonin containing TCP1, subunit 3 isoform b                        | IPI00290770,IPI00553185                         | 60,446.30  | 237 | 247 | IVLLDSSLEYK           | R | K | 1,279.71 |
| <b>3939</b> | CCT3 chaperonin containing TCP1, subunit 3 isoform b                        | IPI00290770,IPI00553185                         | 60,446.30  | 237 | 247 | IVLLDSSLEYK           | R | K | 1,279.71 |
| <b>3940</b> | HSPA1A;HSPA1B Heat shock 70 kDa protein 1                                   | IPI00304925                                     | 70,036.00  | 237 | 247 | LVNHFVEEFKR           | R | K | 1,417.76 |
| <b>3941</b> | HSPA8 Isoform 1 of Heat shock cognate 71 kDa protein                        | IPI00003865                                     | 70,881.80  | 237 | 247 | MVNHFIAEFKR           | R | K | 1,407.72 |
| <b>3942</b> | VDAC1 Voltage-dependent anion-selective channel protein 1                   | IPI00216308                                     | 30,755.90  | 237 | 256 | VNNSSLIGLYTQTLKPGIK   | K | L | 2,103.18 |
| <b>3943</b> | PSMD4 Isoform Rpn10A of 26S proteasome non-ATPase regulatory subunit 4      | IPI00022694                                     | 40,719.20  | 237 | 262 | RAAAASAAEAGIATTGTEDSD | R | M | 2,476.22 |
| <b>3944</b> | EZR Ezrin                                                                   | IPI00746388,IPI00843975,IPI00872684             | 69,265.40  | 237 | 245 | DALLKIGFPWSEIR        | K | N | 1,104.58 |
| <b>3945</b> | DHX9 ATP-dependent RNA helicase A                                           | IPI00844578                                     | 140,943.50 | 237 | 248 | LAQSCALSIVR           | K | Q | 1,288.70 |
| <b>3946</b> | DHX9 ATP-dependent RNA helicase A                                           | IPI00844578                                     | 140,943.50 | 237 | 248 | LAQSCALSIVR           | K | Q | 1,288.70 |
| <b>3947</b> | TRUB2 Probable tRNA pseudouridine synthase 2                                | IPI00024151                                     | 36,677.20  | 237 | 247 | KLVHEIGLELK           | R | T | 1,278.78 |
| <b>3948</b> | CCT7 T-complex protein 1 subunit eta                                        | IPI00018465                                     | 59,349.80  | 237 | 256 | IALLNVELELKAEKDNAEIR  | K | V | 2,281.28 |
| <b>3949</b> | <b>ANP32A Acidic leucine-rich nuclear phosphoprotein 32 family member A</b> | IPI00025849                                     | 28,568.10  | 238 | 249 | KREPEDEGEDDD          | R | - | 1,433.57 |
| <b>3950</b> | ORC6L Origin recognition complex subunit 6                                  | IPI00001641                                     | 28,089.90  | 238 | 248 | KILENAASAQK           | R | A | 1,172.66 |
| <b>3951</b> | UTP18 U3 small nucleolar RNA-associated protein 18 homolog                  | IPI00000733                                     | 64,046.80  | 238 | 250 | TGNFISTSTSLPR         | R | G | 1,380.71 |
| <b>3952</b> | RCC1 regulator of chromosome condensation 1 isoform a                       | IPI00001661,IPI00747309,IPI00787306             | 48,126.30  | 238 | 245 | VPFLFANR              | R | G | 945.5152 |
| <b>3953</b> | STIP1 Stress-induced-phosphoprotein 1                                       | IPI00013894,IPI00871856                         | 62,624.10  | 238 | 246 | KKDFDTALK             | K | H | 1,065.59 |
| <b>3954</b> | SLC25A5 ADP/ATP translocase 2                                               | IPI00007188                                     | 32,878.50  | 238 | 244 | MMMQSGR               | R | K | 856.3475 |
| <b>3955</b> | SLC25A6 ADP/ATP translocase 3                                               | IPI00291467                                     | 32,849.10  | 238 | 244 | MMMQSGR               | R | K | 856.3475 |
| <b>3956</b> | DDAH2 N(G),N(G)-dimethylarginine dimethylaminohydrolase 2                   | IPI00000760                                     | 29,626.30  | 238 | 251 | GGGDLPSQEALQK         | R | L | 1,413.70 |
| <b>3957</b> | TROVE2 Isoform Long of 60 kDa SS-A/Ro ribonucleoprotein                     | IPI00019450,IPI00642416,IPI00646322,IPI00646813 | 60,654.10  | 238 | 252 | TRDELEVIHLEEHR        | R | L | 1,888.99 |
| <b>3958</b> | RDX Radixin, isoform CRA_a                                                  | IPI00017367,IPI00903145                         | 71,032.60  | 238 | 246 | IGFPWSEIR             | K | N | 1,104.58 |
| <b>3959</b> | MSN Moesin                                                                  | IPI00219365,IPI00872814                         | 67,803.80  | 238 | 246 | IGFPWSEIR             | K | N | 1,104.58 |
| <b>3960</b> | PCBP1 Poly(rC)-binding protein 1                                            | IPI00016610                                     | 37,480.20  | 238 | 243 | LNQVAR                | K | Q | 700.41   |
| <b>3961</b> | PCBP1 Poly(rC)-binding protein 1                                            | IPI00016610                                     | 37,480.20  | 238 | 243 | LNQVAR                | K | Q | 700.41   |
| <b>3962</b> | PSMC1 26S protease regulatory subunit 4                                     | IPI00011126                                     | 49,168.40  | 238 | 249 | AVANQTSATFLR          | K | V | 1,278.68 |
| <b>3963</b> | ACTR1A Alpha-centractin                                                     | IPI00029468,IPI00908883                         | 42,597.20  | 239 | 255 | AQYYLPDGGSTIEIGPSR    | K | F | 1,866.92 |
| <b>3964</b> | CCT8 T-complex protein 1 subunit theta                                      | IPI00784090                                     | 59,603.00  | 239 | 254 | IAYSCPFDMITETK        | K | G | 1,847.86 |
| <b>3965</b> | PTBP1 Isoform 1 of Polypyrimidine tract-binding protein 1                   | IPI00179964,IPI00183626,IPI00334175             | 57,204.50  | 239 | 254 | LSLDGQNIYNACCTLR      | K | I | 1,897.89 |

|      |                                                                                         |                                                                         |            |     |     |                                                      |   |   |          |
|------|-----------------------------------------------------------------------------------------|-------------------------------------------------------------------------|------------|-----|-----|------------------------------------------------------|---|---|----------|
| 3966 | DPYSL5 Dihydropyrimidinase-related protein 5                                            | IPI00335509                                                             | 61,402.90  | 239 | 261 | THCPIYLVNVSSISAGDVIAAA<br>K                          | R | M | 2,386.24 |
| 3967 | DNM1L Isoform 5 of Dynamin-1-like protein                                               | IPI00037283,IPI00146935,IPI00235412,IPI00473085,IPI00555883,IPI00871742 | 79,093.20  | 239 | 247 | LGIIGVVNR                                            | K | S | 940.5939 |
| 3968 | DNM1L Isoform 5 of Dynamin-1-like protein                                               | IPI00037283,IPI00146935,IPI00235412,IPI00473085,IPI00555883,IPI00871742 | 79,093.20  | 239 | 247 | LGIIGVVNR                                            | K | S | 940.5939 |
| 3969 | PAFAH1B1 Isoform 1 of Platelet-activating factor acetvlhdrolase IB subunit alpha        | IPI00218728                                                             | 46,619.40  | 239 | 259 | MVRPNQDGTLIASCSNDQTV<br>R                            | R | V | 2,362.12 |
| 3970 | NP cDNA FLJ25678 fis, clone TST04067, highly similar to PURINE NUCLEOSIDE PHOSPHORYLASE | IPI00017672,IPI00871140                                                 | 32,533.50  | 239 | 248 | VFGFSLITNK                                           | R | V | 1,125.63 |
| 3971 | EEF2 Elongation factor 2                                                                | IPI00186290                                                             | 95,322.10  | 240 | 249 | GEGQLGPAER                                           | K | A | 1,013.50 |
| 3972 | EEF2 Elongation factor 2                                                                | IPI00186290                                                             | 95,322.10  | 240 | 249 | GEGQLGPAER                                           | K | A | 1,013.50 |
| 3973 | EEF2 Elongation factor 2                                                                | IPI00186290                                                             | 95,322.10  | 240 | 249 | GEGQLGPAER                                           | K | A | 1,013.50 |
| 3974 | ACTN4 Alpha-actinin-4                                                                   | IPI00013808                                                             | 104,839.20 | 240 | 255 | MLDAEDIVNTARPDEK                                     | K | A | 1,816.87 |
| 3975 | UFD1L Isoform Short of Ubiquitin fusion degradation protein 1 homolog                   | IPI00218292,IPI00655754,IPI00873326                                     | 34,483.20  | 240 | 256 | KGVEPSPSPIKPGDIKR                                    | K | G | 1,805.03 |
| 3976 | NARG1 Isoform 1 of NMDA receptor-regulated protein 1                                    | IPI00386189                                                             | 101,259.90 | 240 | 248 | LEDAADVYR                                            | R | G | 1,051.51 |
| 3977 | RANGAP1 Ran GTPase-activating protein 1                                                 | IPI00294879                                                             | 63,525.30  | 240 | 251 | VINLNDNTFTEK                                         | R | G | 1,407.71 |
| 3978 | STIP1 Stress-induced-phosphoprotein 1                                                   | IPI00013894,IPI00871856                                                 | 62,624.10  | 240 | 246 | DFDTALK                                              | K | H | 809.4041 |
| 3979 | RNASEH2A Ribonuclease H2 subunit A                                                      | IPI00290192                                                             | 33,377.00  | 240 | 267 | TAQTILEKEAEDVIWEDSASE<br>NQEGLRK                     | R | I | 3,189.55 |
| 3980 | PPP2CA Serine/threonine-protein phosphatase 2A catalytic subunit alpha isoform          | IPI00008380                                                             | 35,576.50  | 240 | 254 | AHQLVMEGYNWCHDR                                      | R | N | 1,931.83 |
| 3981 | ENO1 Isoform alpha-enolase of Alpha-enolase                                             | IPI00465248                                                             | 47,152.20  | 240 | 253 | VVIGMDVAASEFFR                                       | K | S | 1,556.78 |
| 3982 | RPS3A 40S ribosomal protein S3a                                                         | IPI00419880,IPI00472119                                                 | 29,927.30  | 241 | 252 | ATGDETGAKVER                                         | K | A | 1,233.61 |
| 3983 | LMNA Isoform A of Lamin-A/C                                                             | IPI00021405                                                             | 74,122.60  | 241 | 249 | LADALQELR                                            | R | A | 1,028.57 |
| 3984 | ATP1A1 Isoform Long of Sodium/potassium-transporting ATPase subunit alpha-1             | IPI00006482,IPI00646182                                                 | 112,881.50 | 241 | 255 | NIAFFSTNCVEGTAR                                      | R | G | 1,686.79 |
| 3985 | CDC48 Borealin                                                                          | IPI00303099                                                             | 31,306.40  | 241 | 248 | LLASDLQR                                             | R | H | 915.5259 |
| 3986 | TTL12 Tubulin--tyrosine ligase-like protein 12                                          | IPI00029048,IPI00879002                                                 | 74,385.70  | 241 | 252 | DFAYGETDPLIR                                         | R | K | 1,396.67 |
| 3987 | RELA Isoform 2 of Transcription factor p65                                              | IPI00219084,IPI00386448,IPI00479470,IPI00883897                         | 58,789.60  | 241 | 254 | TPPYADPSLQAPVR                                       | R | V | 1,511.79 |
| 3988 | PCNA Proliferating cell nuclear antigen                                                 | IPI00021700                                                             | 28,751.30  | 241 | 248 | IADMGHK                                              | K | Y | 900.461  |
| 3989 | - Putative uncharacterized protein ENSP00000348237                                      | IPI00453476,IPI00549725                                                 | 28,832.80  | 242 | 251 | AMEAVAAQ GK                                          | K | A | 991.4878 |
| 3990 | MDH2 Malate dehydrogenase, mitochondrial                                                | IPI00291006                                                             | 35,485.70  | 242 | 257 | AGAGSATLSMAYAGAR                                     | K | F | 1,454.71 |
| 3991 | PCBP2 poly(rC) binding protein 2 isoform b                                              | IPI00012066,IPI00790627                                                 | 38,204.50  | 242 | 272 | LHQLAMQQSHFPMTHGNTG<br>FSGIESSSPEVK<br>DGQAMLWDLNEGK | K | G | 3,382.59 |
| 3992 | GNB2L1 38 kDa protein                                                                   | IPI00641950,IPI00848226                                                 | 37,740.10  | 242 | 254 | FPGQLNADLR                                           | R | K | 1,130.60 |
| 3993 | TUBB2C Tubulin beta-2C chain                                                            | IPI00007752                                                             | 49,812.70  | 242 | 251 | FPGQLNADLR                                           | R | K | 1,130.60 |
| 3994 | TUBB2C Tubulin beta-2C chain                                                            | IPI00007752                                                             | 49,812.70  | 242 | 251 | FPGQLNADLR                                           | R | K | 1,130.60 |
| 3995 | TUBB2C Tubulin beta-2C chain                                                            | IPI00007752                                                             | 49,812.70  | 242 | 251 | FPGQLNADLR                                           | R | K | 1,130.60 |
| 3996 | TUBB Tubulin beta chain                                                                 | IPI00011654                                                             | 49,652.60  | 242 | 251 | FPGQLNADLR                                           | R | K | 1,130.60 |
| 3997 | TUBB Tubulin beta chain                                                                 | IPI00011654                                                             | 49,652.60  | 242 | 251 | FPGQLNADLR                                           | R | K | 1,130.60 |
| 3998 | TUBB2A Tubulin beta-2A chain                                                            | IPI00013475,IPI00031370                                                 | 49,889.10  | 242 | 251 | FPGQLNADLR                                           | R | K | 1,130.60 |
| 3999 | TUBB2A Tubulin beta-2A chain                                                            | IPI00013475,IPI00031370                                                 | 49,889.10  | 242 | 251 | FPGQLNADLR                                           | R | K | 1,130.60 |
| 4000 | TUBB2C Tubulin beta-2C chain                                                            | IPI00007752                                                             | 49,812.70  | 242 | 252 | FPGQLNADLRK                                          | R | L | 1,258.69 |
| 4001 | TUBB2C Tubulin beta-2C chain                                                            | IPI00007752                                                             | 49,812.70  | 242 | 252 | FPGQLNADLRK                                          | R | L | 1,258.69 |
| 4002 | TUBB Tubulin beta chain                                                                 | IPI00011654                                                             | 49,652.60  | 242 | 252 | FPGQLNADLRK                                          | R | L | 1,258.69 |
| 4003 | TUBB Tubulin beta chain                                                                 | IPI00011654                                                             | 49,652.60  | 242 | 252 | FPGQLNADLRK                                          | R | L | 1,258.69 |
| 4004 | TUBB2A Tubulin beta-2A chain                                                            | IPI00013475,IPI00031370                                                 | 49,889.10  | 242 | 252 | FPGQLNADLRK                                          | R | L | 1,258.69 |
| 4005 | TUBB2A Tubulin beta-2A chain                                                            | IPI00013475,IPI00031370                                                 | 49,889.10  | 242 | 252 | FPGQLNADLRK                                          | R | L | 1,258.69 |
| 4006 | DDX5 Probable ATP-dependent RNA helicase DDX5                                           | IPI00017617                                                             | 69,131.70  | 242 | 252 | TTYLVLDEADR                                          | R | M | 1,295.65 |
| 4007 | HSD17B12 Estradiol 17-beta-dehydrogenase 12                                             | IPI00007676                                                             | 34,307.40  | 242 | 257 | IRKPTLDKPSPEFVK                                      | K | S | 1,856.06 |
| 4008 | C9orf64 UPPF0553 protein C9orf64                                                        | IPI00170972                                                             | 39,011.70  | 242 | 253 | LPQVLAHLGALK                                         | R | Y | 1,259.78 |

|      |                                                                           |                                                             |            |     |     |                          |   |   |          |
|------|---------------------------------------------------------------------------|-------------------------------------------------------------|------------|-----|-----|--------------------------|---|---|----------|
| 4009 | PSMA1 Isoform Short of Proteasome subunit alpha type-1                    | IPI00016832,IPI00472442                                     | 29,538.00  | 243 | 263 | KAQPAQPADEPAEKADPEME H   | R | - | 2,305.04 |
| 4010 | NOP2 Putative uncharacterized protein NOL1                                | IPI00294891,IPI00654555,IPI00872909                         | 93,966.90  | 243 | 251 | IQDIVGILR                | R | D | 1,026.63 |
| 4011 | EIF3G Eukaryotic translation initiation factor 3 subunit G                | IPI00290460                                                 | 35,593.90  | 243 | 251 | VTNLSEDTR                | R | E | 1,034.51 |
| 4012 | CKB Creatine kinase B-type                                                | IPI00022977                                                 | 42,627.10  | 243 | 252 | GGNMKEVFTR               | K | F | 1,154.56 |
| 4013 | SEC13 Protein SEC13 homolog                                               | IPI00375370,IPI00479141,IPI00789169,IPI00789755,IPI00853598 | 35,838.00  | 243 | 259 | VFIWTCDDASSNTWSPK        | R | L | 2,013.90 |
| 4014 | IGF2BP1 Insulin-like growth factor 2 mRNA-binding protein 1               | IPI00008557                                                 | 63,438.30  | 243 | 258 | AISVHSTPEGCSSACK         | K | M | 1,690.75 |
| 4015 | IGF2BP3 Isoform 1 of Insulin-like growth factor 2 mRNA-binding protein 3  | IPI00658000                                                 | 63,702.90  | 243 | 258 | SITILSTPEGTSAACK         | K | S | 1,635.83 |
| 4016 | PSMA1 Isoform Short of Proteasome subunit alpha type-1                    | IPI00016832,IPI00472442                                     | 29,538.00  | 244 | 256 | AQPAQPADEPAEK            | K | A | 1,351.65 |
| 4017 | RRM1 Ribonucleoside-diphosphate reductase large subunit                   | IPI00013871                                                 | 90,055.50  | 244 | 256 | SAGGIGVAVSCIR            | K | A | 1,246.66 |
| 4018 | PA2G4 Proliferation-associated protein 2G4                                | IPI00299000,IPI00794875                                     | 43,768.70  | 244 | 249 | TTIYKR                   | R | D | 781.4567 |
| 4019 | TP11 Isoform 1 of Triosephosphate isomerase                               | IPI00465028                                                 | 30,772.80  | 244 | 256 | IYGGSVTGATCK             | R | E | 1,326.67 |
| 4020 | TP11 Isoform 1 of Triosephosphate isomerase                               | IPI00465028                                                 | 30,772.80  | 244 | 256 | IYGGSVTGATCK             | R | E | 1,326.67 |
| 4021 | TP11 Isoform 1 of Triosephosphate isomerase                               | IPI00465028                                                 | 30,772.80  | 244 | 256 | IYGGSVTGATCK             | R | E | 1,326.67 |
| 4022 | C12orf10 UPF0160 protein MYG1                                             | IPI00029444,IPI00304163,IPI00796436,IPI00797519             | 42,428.00  | 244 | 253 | ALVEEALQR                | R | F | 1,099.61 |
| 4023 | AKR1B1 Aldose reductase                                                   | IPI00413641                                                 | 35,835.90  | 244 | 251 | TTAQVLR                  | K | F | 901.5466 |
| 4024 | TUBA1A Tubulin alpha-1A chain                                             | IPI00180675                                                 | 50,117.70  | 244 | 264 | FDGALNVDLTFQTNLVYPR      | R | I | 2,409.21 |
| 4025 | TUBA1C Tubulin alpha-1C chain                                             | IPI00218343                                                 | 49,877.40  | 244 | 264 | FDGALNVDLTFQTNLVYPR      | R | I | 2,409.21 |
| 4026 | TUBA1B Tubulin alpha-1B chain                                             | IPI00387144,IPI00792677                                     | 50,133.70  | 244 | 264 | FDGALNVDLTFQTNLVYPR      | R | I | 2,409.21 |
| 4027 | PRPS1 Ribose-phosphate pyrophosphokinase 1                                | IPI00219616,IPI00917169                                     | 34,816.70  | 244 | 260 | VYALTHGIFSGPAISR         | R | I | 1,802.00 |
| 4028 | CCT4 T-complex protein 1 subunit delta                                    | IPI00302927,IPI00873222                                     | 57,907.90  | 244 | 257 | AKIGLIQFCLSAPK           | K | T | 1,545.88 |
| 4029 | AKR1A1 Alcohol dehydrogenase [NADP+]                                      | IPI00220271                                                 | 36,555.60  | 244 | 251 | SPAQILLR                 | R | W | 897.5517 |
| 4030 | TES Isoform 1 of Testin                                                   | IPI00024097,IPI00216425,IPI00873055                         | 47,977.60  | 245 | 254 | EGDPAIYAER               | K | A | 1,120.53 |
| 4031 | SLC25A6 ADP/ATP translocase 3                                             | IPI00291467                                                 | 32,849.10  | 245 | 260 | KGADIMYGTVDWCWRK         | R | I | 1,916.90 |
| 4032 | SLC25A5 ADP/ATP translocase 2                                             | IPI00007188                                                 | 32,878.50  | 245 | 259 | KGTDIMYGTLDWCWR          | R | K | 1,832.83 |
| 4033 | FBL rRNA 2'-O-methyltransferase fibrillar                                 | IPI00025039                                                 | 33,766.10  | 245 | 255 | IVALNAHTFLR              | R | N | 1,254.73 |
| 4034 | - cDNA FLJ54408, highly similar to Heat shock 70 kDa protein 1            | IPI00911039                                                 | 63,907.90  | 245 | 256 | ARFEELCSDLFR             | R | S | 1,542.74 |
| 4035 | RBBP5 cDNA FLJ59722, highly similar to Retinoblastoma-binding protein 5   | IPI00478230,IPI00645975                                     | 55,054.60  | 245 | 251 | LQDLVNR                  | K | T | 857.484  |
| 4036 | GDI2 cDNA FLJ60299, highly similar to Rab GDP dissociation inhibitor beta | IPI00031461                                                 | 51,138.50  | 245 | 268 | LSAIYGGTYMLNKPIEIIVQN GK | R | V | 2,667.41 |
| 4037 | NUDCD3 NudC domain-containing protein 3                                   | IPI00238209                                                 | 40,803.60  | 246 | 259 | INTESSLWSLEPGK           | K | C | 1,560.79 |
| 4038 | RPS4X 40S ribosomal protein S4, X isoform                                 | IPI00217030                                                 | 29,581.30  | 246 | 252 | LTIAEER                  | R | D | 831.4571 |
| 4039 | PREP Prolyl endopeptidase                                                 | IPI00008164                                                 | 80,683.50  | 246 | 252 | YVLLSIR                  | R | E | 863.5349 |
| 4040 | PPAT Amidophosphoribosyltransferase                                       | IPI00029534                                                 | 57,381.30  | 246 | 260 | YYREVLPGEIVEISR          | R | H | 1,822.97 |
| 4041 | SLC25A6 ADP/ATP translocase 3                                             | IPI00291467                                                 | 32,849.10  | 246 | 259 | GADIMYGTVDWCWR           | K | K | 1,660.71 |
| 4042 | SLC25A5 ADP/ATP translocase 2                                             | IPI00007188                                                 | 32,878.50  | 246 | 259 | GTDIMYGTLDWCWR           | K | K | 1,704.74 |
| 4043 | TALDO1 Transaldolase                                                      | IPI00744692                                                 | 37,523.70  | 246 | 258 | ALAGCDFLTISPK            | K | L | 1,392.72 |
| 4044 | TNPO1 transportin 1 isoform 1                                             | IPI00024364,IPI00843876                                     | 102,340.80 | 246 | 254 | ALVMLLEVR                | R | M | 1,059.62 |
| 4045 | TCP1 T-complex protein 1 subunit alpha                                    | IPI00290566                                                 | 60,327.20  | 246 | 264 | MKLVGVQVVITDPEKLDQIR     | K | Q | 2,198.22 |
| 4046 | CCT4 T-complex protein 1 subunit delta                                    | IPI00302927,IPI00873222                                     | 57,907.90  | 246 | 257 | IGLIQFCLSAPK             | K | T | 1,346.75 |
| 4047 | PDIA4 Protein disulfide-isomerase A4                                      | IPI00009904                                                 | 72,916.00  | 247 | 256 | FDVSGYPTLK               | R | I | 1,126.58 |
| 4048 | PGK1 Phosphoglycerate kinase 1                                            | IPI00169383                                                 | 44,597.30  | 247 | 264 | VLNMEIGTSLFDEEGAK        | K | I | 1,966.94 |
| 4049 | BZW1 Isoform 2 of Basic leucine zipper and W2 domain-containing protein 1 | IPI00180128,IPI00785096,IPI00916112,IPI00916503,IPI00918019 | 40,522.00  | 247 | 254 | NQQTIGAR                 | R | K | 887.4694 |
| 4050 | PDLIM1 PDZ and LIM domain protein 1                                       | IPI00010414                                                 | 36,053.30  | 247 | 256 | VAASIGNAQK               | K | L | 958.5316 |
| 4051 | PPP1CA Serine/threonine-protein phosphatase PP1-alpha catalytic subunit   | IPI00550451                                                 | 37,495.90  | 247 | 261 | AHQVVEDGYEFFAKR          | R | Q | 1,795.88 |

|      |                                                                            |                                     |            |     |     |                             |   |   |          |
|------|----------------------------------------------------------------------------|-------------------------------------|------------|-----|-----|-----------------------------|---|---|----------|
| 4052 | - cDNA FLJ54408, highly similar to Heat shock 70 kDa protein 1             | IPI00911039                         | 63,907.90  | 247 | 256 | FEELCSDLFR                  | R | S | 1,315.60 |
| 4053 | NANS Sialic acid synthase                                                  | IPI00147874                         | 40,289.90  | 247 | 264 | GSDHSASLEPGELAEIVR          | K | S | 1,866.92 |
| 4054 | PHGDH D-3-phosphoglycerate dehydrogenase                                   | IPI00011200                         | 56,632.60  | 248 | 270 | ALQSGQCAGAALDVFTEEPP<br>RDR | R | A | 2,488.19 |
| 4055 | PLS3 plastin 3                                                             | IPI00216694                         | 70,795.90  | 248 | 256 | NEALAALLR                   | R | D | 970.568  |
| 4056 | CLINT1 Isoform 1 of Clathrin interactor 1                                  | IPI00291930                         | 68,242.50  | 248 | 260 | GEFKDEEETVTTK               | K | H | 1,512.71 |
| 4057 | CCT3 chaperonin containing TCP1, subunit 3 isoform b                       | IPI00290770,IPI00553185             | 60,446.30  | 248 | 265 | KGESQTDIEITREEDFTR          | K | I | 2,154.03 |
| 4058 | EEF1A2 Elongation factor 1-alpha 2                                         | IPI00014424                         | 50,452.60  | 248 | 255 | LPLQDVYK                    | R | I | 975.5511 |
| 4059 | EEF1A1 Elongation factor 1-alpha 1                                         | IPI00396485                         | 50,123.20  | 248 | 255 | LPLQDVYK                    | R | I | 975.5511 |
| 4060 | EEF1A1 Elongation factor 1-alpha 1                                         | IPI00396485                         | 50,123.20  | 248 | 255 | LPLQDVYK                    | R | I | 975.5511 |
| 4061 | G3BP1 Ras GTPase-activating protein-binding protein 1                      | IPI00012442                         | 52,144.80  | 248 | 257 | TFSWASVTSK                  | R | N | 1,113.56 |
| 4062 | TCP1 T-complex protein 1 subunit alpha                                     | IPI00290566                         | 60,327.20  | 248 | 264 | LGVQVVITDPEKLDQIR           | K | Q | 1,923.09 |
| 4063 | TCP1 T-complex protein 1 subunit alpha                                     | IPI00290566                         | 60,327.20  | 248 | 264 | LGVQVVITDPEKLDQIR           | K | Q | 1,923.09 |
| 4064 | HNRNPA2B1 43 kDa protein                                                   | IPI00874030                         | 43,234.30  | 248 | 261 | ALSRQEMQEVQSSR              | K | S | 1,664.80 |
| 4065 | ILF3 Isoform 1 of Interleukin enhancer-binding factor 3                    | IPI00298788                         | 95,320.90  | 248 | 257 | GWPELLLCEK                  | R | S | 1,244.63 |
| 4066 | PCNA Proliferating cell nuclear antigen                                    | IPI00021700                         | 28,751.30  | 249 | 261 | YYLAPKIEDEEGS               | K | - | 1,513.71 |
| 4067 | DDRGK1 Isoform 1 of Uncharacterized protein C20orf116                      | IPI00028387                         | 35,593.00  | 249 | 265 | IQDLLAEGTITGVIDDR           | R | G | 1,828.97 |
| 4068 | HNRNPL Heterogeneous nuclear ribonucleoprotein L                           | IPI00027834                         | 64,114.80  | 249 | 264 | ASLNGADIYSGCCTLK            | K | I | 1,729.79 |
| 4069 | PAPSS1 Bifunctional 3'-phosphoadenosine 5'-phosphosulfate synthetase 1     | IPI00011619                         | 70,815.20  | 249 | 258 | TDAETLPALK                  | K | I | 1,058.57 |
| 4070 | PCNA Proliferating cell nuclear antigen                                    | IPI00021700                         | 28,751.30  | 249 | 254 | YYLAPK                      | K | I | 754.4134 |
| 4071 | PCNA Proliferating cell nuclear antigen                                    | IPI00021700                         | 28,751.30  | 249 | 254 | YYLAPK                      | K | I | 754.4134 |
| 4072 | UHRF1 ubiquitin-like with PHD and ring finger domains 1 isoform 2          | IPI00797279,IPI00797945             | 91,082.30  | 249 | 258 | GFWYDAEISR                  | R | K | 1,243.57 |
| 4073 | NPM1 Isoform 2 of Nucleophosmin                                            | IPI00220740,IPI00549248             | 29,446.90  | 249 | 262 | MTDQEIQLDWQWR               | R | K | 1,819.84 |
| 4074 | BLVRA Biliverdin reductase A                                               | IPI00294158                         | 33,411.00  | 249 | 261 | NIFLKDQNFVQK                | K | L | 1,606.90 |
| 4075 | GAPDH Glyceraldehyde-3-phosphate dehydrogenase                             | IPI00219018                         | 36,035.30  | 249 | 260 | LEKPAKYDDIKK                | R | V | 1,447.82 |
| 4076 | YRDC YrdC domain-containing protein, mitochondrial                         | IPI00384180                         | 29,310.30  | 249 | 268 | FGIIRPGCALESTTAILQK         | K | Y | 2,203.19 |
| 4077 | FARSB Phenylalanyl-tRNA synthetase beta chain                              | IPI00300074                         | 66,114.60  | 250 | 262 | NIFIECTGTDFTK               | R | A | 1,545.73 |
| 4078 | AP3S1 AP-3 complex subunit sigma-1                                         | IPI00014624                         | 32,126.80  | 250 | 260 | SEAGLAGAPAR                 | K | A | 999.5218 |
| 4079 | UROD Uroporphyrinogen decarboxylase                                        | IPI00301489,IPI00514944             | 40,769.20  | 250 | 263 | EAGLAPVPMIIFAK              | R | D | 1,472.82 |
| 4080 | PRPSAP2 Phosphoribosyl pyrophosphate synthetase-associated protein 2       | IPI00003168                         | 40,908.60  | 250 | 263 | EKPPIITVVGVDVGGRR           | K | I | 1,423.79 |
| 4081 | MAT2A S-adenosylmethionine synthetase isoform type-2                       | IPI00010157                         | 43,642.80  | 250 | 264 | FVIGGPQGDAGLTGR             | R | K | 1,444.75 |
| 4082 | PRKACA Isoform 2 of cAMP-dependent protein kinase catalytic subunit alpha  | IPI00217960,IPI00396630             | 39,805.50  | 250 | 263 | FPSHFSSDLKDLLR              | R | N | 1,661.86 |
| 4083 | GART Isoform Long of Trifunctional purine biosynthetic protein adenosine-3 | IPI00025273                         | 107,750.40 | 250 | 257 | IKDTVLR                     | K | T | 972.5838 |
| 4084 | ASCC1 Isoform 2 of Activating signal cointegrator 1 complex subunit 1      | IPI00434390                         | 41,210.40  | 250 | 256 | LQELVDR                     | R | V | 872.4837 |
| 4085 | MTHFD1 C-1-tetrahydrofolate synthase, cytoplasmic                          | IPI00218342,IPI00794900             | 101,543.50 | 251 | 264 | KVVGVDVAYDEAKER             | R | A | 1,578.81 |
| 4086 | STIP1 Stress-induced-phosphoprotein 1                                      | IPI00013894,IPI00871856             | 62,624.10  | 251 | 272 | AKELDPTNMTYITNQAAYVFE<br>K  | K | G | 2,547.24 |
| 4087 | RRM2 Ribonucleoside-diphosphate reductase M2 subunit                       | IPI00011118                         | 51,076.50  | 251 | 264 | EFLFNAIETMPCVK              | R | K | 1,714.82 |
| 4088 | AKR7A2 Aflatoxin B1 aldehyde reductase member 2                            | IPI00305978                         | 39,571.00  | 251 | 261 | FFGNSWAETYR                 | R | N | 1,377.62 |
| 4089 | PPP6C Serine/threonine-protein phosphatase 6 catalytic subunit             | IPI00012970,IPI00890743,IPI00890827 | 35,126.80  | 252 | 264 | LVTVWSAPNYCYR               | K | C | 1,628.79 |

|      |                                                                                    |                                     |            |     |     |                              |   |   |          |
|------|------------------------------------------------------------------------------------|-------------------------------------|------------|-----|-----|------------------------------|---|---|----------|
| 4090 | ATIC Bifunctional purine biosynthesis protein PURH                                 | IPI00289499                         | 64,598.50  | 252 | 266 | ELKEALGIPAAASF               | K | H | 1,544.87 |
| 4091 | TUBB2C Tubulin beta-2C chain                                                       | IPI00007752                         | 49,812.70  | 252 | 262 | KLAVNMVPPFR                  | R | L | 1,287.72 |
| 4092 | TUBB2C Tubulin beta-2C chain                                                       | IPI00007752                         | 49,812.70  | 252 | 262 | KLAVNMVPPFR                  | R | L | 1,271.73 |
| 4093 | TUBB Tubulin beta chain                                                            | IPI00011654                         | 49,652.60  | 252 | 262 | KLAVNMVPPFR                  | R | L | 1,287.72 |
| 4094 | TUBB Tubulin beta chain                                                            | IPI00011654                         | 49,652.60  | 252 | 262 | KLAVNMVPPFR                  | R | L | 1,271.73 |
| 4095 | TUBB2A Tubulin beta-2A chain                                                       | IPI00013475,IPI00031370             | 49,889.10  | 252 | 262 | KLAVNMVPPFR                  | R | L | 1,287.72 |
| 4096 | TUBB2A Tubulin beta-2A chain                                                       | IPI00013475,IPI00031370             | 49,889.10  | 252 | 262 | KLAVNMVPPFR                  | R | L | 1,271.73 |
| 4097 | - cDNA FLJ54554, highly similar to Pyruvate kinase isozymes M1/M2                  | IPI00910979                         | 56,255.30  | 252 | 263 | IISKIENHEGVR                 | K | R | 1,394.78 |
| 4098 | ATP1B3 Sodium/potassium-transporting ATPase subunit beta-3                         | IPI00008167                         | 31,495.70  | 252 | 259 | IDGSANLK                     | K | S | 817.4415 |
| 4099 | CSE1L Isoform 1 of Exportin-2                                                      | IPI00022744,IPI00219994             | 110,403.90 | 252 | 268 | LLQTDDEEEAGLLELLK            | K | S | 1,929.01 |
| 4100 | HNRNPA2B1 43 kDa protein                                                           | IPI00874030                         | 43,234.30  | 252 | 261 | QEMQEVQSSR                   | R | S | 1,221.55 |
| 4101 | HNRNPA2B1 43 kDa protein                                                           | IPI00874030                         | 43,234.30  | 252 | 261 | QEMQEVQSSR                   | R | S | 1,221.55 |
| 4102 | HNRNPA2B1 43 kDa protein                                                           | IPI00874030                         | 43,234.30  | 252 | 261 | QEMQEVQSSR                   | R | S | 1,237.55 |
| 4103 | HNRNPA2B1 43 kDa protein                                                           | IPI00874030                         | 43,234.30  | 252 | 261 | QEMQEVQSSR                   | R | S | 1,237.55 |
| 4104 | PYCR2 Pyrroline-5-carboxylate reductase 2                                          | IPI00470610,IPI00747534             | 33,619.80  | 252 | 264 | LLINAVEASCIR                 | R | T | 1,445.78 |
| 4105 | STIP1 Stress-induced-phosphoprotein 1                                              | IPI00013894,IPI00871856             | 62,624.10  | 253 | 277 | ELDPTNMTYITNQAAYFEKG<br>DYNK | K | C | 2,941.36 |
| 4106 | TCEA1 Isoform 1 of Transcription elongation factor A protein 1                     | IPI00333215                         | 33,952.60  | 253 | 265 | TGGTQDTLFTCGK                | K | C | 1,385.64 |
| 4107 | STIP1 Stress-induced-phosphoprotein 1                                              | IPI00013894,IPI00871856             | 62,624.10  | 253 | 272 | ELDPTNMTYITNQAAYFEK          | K | G | 2,364.11 |
| 4108 | BXDC1 Brix domain-containing protein 1                                             | IPI00396329                         | 35,567.50  | 253 | 265 | NISHDTFGTTYGR                | K | I | 1,468.68 |
| 4109 | DDX5 Probable ATP-dependent RNA helicase DDX5                                      | IPI00017617                         | 69,131.70  | 253 | 263 | MLDMGFEPQIR                  | R | K | 1,352.63 |
| 4110 | CORO1C Coronin-1C_i3 protein                                                       | IPI00867509                         | 58,930.80  | 253 | 257 | VIDPR                        | R | K | 599.3512 |
| 4111 | TUBB2C Tubulin beta-2C chain                                                       | IPI00007752                         | 49,812.70  | 253 | 262 | LAVNMVPPFR                   | K | L | 1,159.63 |
| 4112 | TUBB2C Tubulin beta-2C chain                                                       | IPI00007752                         | 49,812.70  | 253 | 262 | LAVNMVPPFR                   | K | L | 1,159.63 |
| 4113 | TUBB2C Tubulin beta-2C chain                                                       | IPI00007752                         | 49,812.70  | 253 | 262 | LAVNMVPPFR                   | K | L | 1,159.63 |
| 4114 | TUBB Tubulin beta chain                                                            | IPI00011654                         | 49,652.60  | 253 | 262 | LAVNMVPPFR                   | K | L | 1,159.63 |
| 4115 | TUBB Tubulin beta chain                                                            | IPI00011654                         | 49,652.60  | 253 | 262 | LAVNMVPPFR                   | K | L | 1,159.63 |
| 4116 | TUBB Tubulin beta chain                                                            | IPI00011654                         | 49,652.60  | 253 | 262 | LAVNMVPPFR                   | K | L | 1,159.63 |
| 4117 | TUBB2A Tubulin beta-2A chain                                                       | IPI00013475,IPI00031370             | 49,889.10  | 253 | 262 | LAVNMVPPFR                   | K | L | 1,159.63 |
| 4118 | TUBB2A Tubulin beta-2A chain                                                       | IPI00013475,IPI00031370             | 49,889.10  | 253 | 262 | LAVNMVPPFR                   | K | L | 1,159.63 |
| 4119 | AASDHPPT L-aminoadipate-semialdehyde dehydrogenase-phosphopantetheinyl transferase | IPI00250297                         | 35,759.10  | 253 | 267 | HQDVPSQDDSKPTQR              | R | Q | 1,737.82 |
| 4120 | CKB Creatine kinase B-type                                                         | IPI00022977                         | 42,627.10  | 253 | 265 | FCTGLTQIETLFK                | R | S | 1,557.80 |
| 4121 | CTPS2 CTP synthase 2                                                               | IPI00645702                         | 65,661.40  | 253 | 264 | VPVLLLEEQSIVK                | R | Y | 1,353.80 |
| 4122 | TXLNA Alpha-taxilin                                                                | IPI00470779                         | 61,873.20  | 254 | 262 | SLKEEGVQR                    | R | A | 1,045.56 |
| 4123 | RUVBL2 RuvB-like 2                                                                 | IPI00009104                         | 51,140.10  | 254 | 273 | TQGFLALFSGDTGEIKSEVR         | R | E | 2,155.10 |
| 4124 | WDR54 Isoform 1 of WD repeat-containing protein 54                                 | IPI00029811                         | 35,872.20  | 254 | 266 | AICALDLASEVGK                | R | L | 1,346.70 |
| 4125 | TRIM28 Isoform 1 of Transcription intermediary factor 1-beta                       | IPI00438229,IPI00438230             | 88,531.00  | 254 | 262 | KLLASLVKR                    | R | L | 1,027.70 |
| 4126 | HNRNPAB Isoform 3 of Heterogeneous nuclear ribonucleoprotein A/B                   | IPI00334713                         | 30,570.20  | 254 | 271 | GSGGGGGGGGGQGSTNYGK          | R | S | 1,454.63 |
| 4127 | ENO1 Isoform alpha-enolase of Alpha-enolase                                        | IPI00465248                         | 47,152.20  | 254 | 262 | SGKYDLDFK                    | R | S | 1,072.53 |
| 4128 | ENO1 Isoform alpha-enolase of Alpha-enolase                                        | IPI00465248                         | 47,152.20  | 254 | 269 | SGKYDLDFKSPDDPSR             | R | Y | 1,826.86 |
| 4129 | ENO1 Isoform alpha-enolase of Alpha-enolase                                        | IPI00465248                         | 47,152.20  | 254 | 269 | SGKYDLDFKSPDDPSR             | R | Y | 1,826.86 |
| 4130 | DDX17 DEAD box polypeptide 17 isoform 1                                            | IPI00023785,IPI00651653             | 80,256.00  | 255 | 269 | ELAQQVQQVADDYQK              | R | C | 1,691.82 |
| 4131 | DDX17 DEAD box polypeptide 17 isoform 1                                            | IPI00023785,IPI00651653             | 80,256.00  | 255 | 269 | ELAQQVQQVADDYQK              | R | C | 1,691.82 |
| 4132 | PPP2CA Serine/threonine-protein phosphatase 2A catalytic subunit alpha isoform     | IPI00008380                         | 35,576.50  | 255 | 268 | NVVTIFAPNYCYR                | R | C | 1,703.82 |
| 4133 | C20orf43 cDNA FLJ52798                                                             | IPI00218962,IPI00297121,IPI00792834 | 37,482.10  | 255 | 266 | TGKPEEASLDSR                 | K | E | 1,289.63 |



|      |                                                                                                  |                                                                         |            |     |     |                                    |   |   |          |
|------|--------------------------------------------------------------------------------------------------|-------------------------------------------------------------------------|------------|-----|-----|------------------------------------|---|---|----------|
| 4134 | PRPF6 Pre-mRNA-processing factor 6                                                               | IPI00305068                                                             | 106,909.70 | 255 | 271 | LSQVSDSVSGQTVVDPK                  | R | G | 1,745.89 |
| 4135 | PSMD13 proteasome 26S non-ATPase subunit 13 isoform 2                                            | IPI00375380,IPI00549672                                                 | 42,924.90  | 255 | 272 | TAWGQQPDLAANEAQLLR                 | K | K | 1,982.01 |
| 4136 | GAPDH Glyceraldehyde-3-phosphate dehydrogenase                                                   | IPI00219018                                                             | 36,035.30  | 255 | 259 | YDDIK                              | K | K | 653.3142 |
| 4137 | PELO Protein pelota homolog                                                                      | IPI00106698                                                             | 43,358.40  | 255 | 265 | EALCDPTVASR                        | K | L | 1,218.58 |
| 4138 | APEX1 DNA-(apurinic or apyrimidinic site) lyase                                                  | IPI00215911                                                             | 35,537.70  | 255 | 274 | HLYPNTPYAYTFWYMMNAR                | R | S | 2,572.14 |
| 4139 | P4HB Protein disulfide-isomerase                                                                 | IPI00010796                                                             | 57,100.10  | 255 | 263 | THILLFLPK                          | K | S | 1,081.68 |
| 4140 | PTBP1 Isoform 1 of Polypyrimidine tract-binding protein 1                                        | IPI00179964,IPI00183626,IPI00334175                                     | 57,204.50  | 255 | 266 | IDFSKLTSLNVK                       | R | Y | 1,364.78 |
| 4141 | HNRNPU heterogeneous nuclear ribonucleoprotein U isoform a                                       | IPI00644079                                                             | 90,567.20  | 256 | 268 | GYFEYIEENKYSR                      | R | A | 1,697.78 |
| 4142 | AURKA Serine/threonine-protein kinase 6                                                          | IPI00298940                                                             | 45,791.80  | 256 | 271 | DIKPENLLLSAGELK                    | R | I | 1,696.95 |
| 4143 | DIS3 Isoform 2 of Exosome complex exonuclease RRP44                                              | IPI00183462,IPI00746351                                                 | 105,025.50 | 256 | 269 | AVHEDIVAVELLPK                     | R | S | 1,532.87 |
| 4144 | DHRS7B Dehydrogenase/reductase SDR family member 7B                                              | IPI00550165,IPI00871975                                                 | 35,101.90  | 256 | 267 | YGVMDTTTAQGR                       | R | S | 1,315.59 |
| 4145 | PFKM cDNA FLJ44241 fis, clone THYMU3008436, highly similar to 6-phosphofructokinase, muscle type | IPI00465179,IPI00743142                                                 | 93,203.30  | 256 | 272 | IMEIVDAITTTAQSHQR                  | R | T | 1,929.97 |
| 4146 | EEF1A2 Elongation factor 1-alpha 2                                                               | IPI00014424                                                             | 50,452.60  | 256 | 266 | IGGIGTVPVGR                        | K | V | 1,025.61 |
| 4147 | EEF1A1 Elongation factor 1-alpha 1                                                               | IPI00396485                                                             | 50,123.20  | 256 | 266 | IGGIGTVPVGR                        | K | V | 1,025.61 |
| 4148 | EEF1A1 Elongation factor 1-alpha 1                                                               | IPI00396485                                                             | 50,123.20  | 256 | 266 | IGGIGTVPVGR                        | K | V | 1,025.61 |
| 4149 | EEF1A1 Elongation factor 1-alpha 1                                                               | IPI00396485                                                             | 50,123.20  | 256 | 266 | IGGIGTVPVGR                        | K | V | 1,025.61 |
| 4150 | EEF1A1 Elongation factor 1-alpha 1                                                               | IPI00396485                                                             | 50,123.20  | 256 | 266 | IGGIGTVPVGR                        | K | V | 1,025.61 |
| 4151 | TPI1 Isoform 1 of Triosephosphate isomerase                                                      | IPI00465028                                                             | 30,772.80  | 257 | 285 | ELASQPDVDGFLVGGASLKP<br>EFVDIINAK  | K | - | 3,029.58 |
| 4152 | TPI1 Isoform 1 of Triosephosphate isomerase                                                      | IPI00465028                                                             | 30,772.80  | 257 | 286 | ELASQPDVDGFLVGGASLKP<br>EFVDIINAKQ | K | - | 3,157.64 |
| 4153 | NUDC Nuclear migration protein nudC                                                              | IPI00550746                                                             | 38,225.70  | 257 | 268 | LVSSDPEINTKK                       | R | I | 1,330.72 |
| 4154 | NUDC Nuclear migration protein nudC                                                              | IPI00550746                                                             | 38,225.70  | 257 | 267 | LVSSDPEINTK                        | R | K | 1,202.63 |
| 4155 | BZW2 Basic leucine zipper and W2 domain-containing protein 2                                     | IPI00022305,IPI00894416                                                 | 48,146.00  | 257 | 265 | ELQKELQER                          | K | L | 1,172.63 |
| 4156 | VDAC1 Voltage-dependent anion-selective channel protein 1                                        | IPI00216308                                                             | 30,755.90  | 257 | 274 | LTLALLDGKKNVAGGHK                  | K | L | 1,808.00 |
| 4157 | PSMD3 26S proteasome non-ATPase regulatory subunit 3                                             | IPI00011603                                                             | 60,961.60  | 257 | 269 | NYLHYSLYDQAEK                      | R | L | 1,643.77 |
| 4158 | VDAC3 Isoform 1 of Voltage-dependent anion-selective channel protein 3                           | IPI00031804,IPI00294779                                                 | 30,641.90  | 257 | 266 | LTLALIDGK                          | K | N | 1,030.61 |
| 4159 | VDAC1 Voltage-dependent anion-selective channel protein 1                                        | IPI00216308                                                             | 30,755.90  | 257 | 266 | LTLALLDGK                          | K | N | 1,030.61 |
| 4160 | VDAC1 Voltage-dependent anion-selective channel protein 1                                        | IPI00216308                                                             | 30,755.90  | 257 | 266 | LTLALLDGK                          | K | N | 1,030.61 |
| 4161 | CNN3 Calponin-3                                                                                  | IPI00216682,IPI00873410,IPI00909623                                     | 36,396.60  | 257 | 265 | GMSVYGLGR                          | K | Q | 955.4667 |
| 4162 | GNB1 Guanine nucleotide-binding protein G(I)/G(S)/G(T) subunit beta-1                            | IPI00026268                                                             | 37,359.50  | 257 | 280 | ADQELMTYSHDNIICGITSVSF<br>SK       | R | S | 2,716.26 |
| 4163 | VDAC2 Isoform 2 of Voltage-dependent anion-selective channel protein 2                           | IPI00024145,IPI00216026,IPI00455531,IPI00737171,IPI00888783,IPI00902560 | 30,395.00  | 257 | 266 | LTLALVDGK                          | K | S | 1,016.60 |
| 4164 | DDX27 Probable ATP-dependent RNA helicase DDX27                                                  | IPI00293078                                                             | 89,820.10  | 257 | 268 | DICACAATGTGK                       | K | T | 1,224.54 |
| 4165 | NONO Non-POU domain-containing octamer-binding protein                                           | IPI00304596                                                             | 54,213.60  | 257 | 270 | FAQPGSFYEYAMR                      | R | W | 1,695.75 |
| 4166 | YBX1 Nuclease-sensitive element-binding protein 1                                                | IPI00031812,IPI00643351                                                 | 35,905.70  | 257 | 280 | EDGNEEDKENQGDETGGQQ<br>PPQRR       | R | Y | 2,784.21 |
| 4167 | EXOSC9 Isoform 2 of Exosome complex exonuclease RRP45                                            | IPI00029697,IPI00654592                                                 | 50,786.00  | 258 | 267 | VAEITELILK                         | K | A | 1,128.69 |
| 4168 | DDX21 Isoform 1 of Nucleolar RNA helicase 2                                                      | IPI00015953                                                             | 87,328.00  | 258 | 270 | GRAPQVLVLAPTR                      | R | E | 1,377.83 |
| 4169 | NSUN2 tRNA (cytosine-5-)-methyltransferase NSUN2                                                 | IPI00306369                                                             | 86,454.80  | 258 | 264 | EILFYDR                            | K | I | 955.4884 |

|      |                                                                                                                      |                                                             |            |     |     |                             |   |   |          |
|------|----------------------------------------------------------------------------------------------------------------------|-------------------------------------------------------------|------------|-----|-----|-----------------------------|---|---|----------|
| 4170 | PSMD14 26S proteasome non-ATPase regulatory subunit 14                                                               | IPI00024821                                                 | 34,558.60  | 258 | 273 | AVEEEDKMTPEQLAIK            | K | N | 1,846.91 |
| 4171 | IGF2BP1 Insulin-like growth factor 2 mRNA-binding protein 1                                                          | IPI00008557                                                 | 63,438.30  | 259 | 266 | MILEIMHK                    | K | E | 1,014.55 |
| 4172 | PSMD11 Proteasome 26S non-ATPase subunit 11 variant (Fragment)                                                       | IPI00105598                                                 | 47,519.40  | 259 | 274 | IMLNTPEDVQALVSGK            | K | L | 1,714.90 |
| 4173 | TALDO1 Transaldolase                                                                                                 | IPI00744692                                                 | 37,523.70  | 259 | 269 | LLGELLQDNAK                 | K | L | 1,213.68 |
| 4174 | LMNB1 Lamin-B1                                                                                                       | IPI00217975                                                 | 66,391.60  | 259 | 271 | LYKEELEQTYHAK               | R | L | 1,651.83 |
| 4175 | PSMC5 26S protease regulatory subunit 8                                                                              | IPI00023919,IPI00745502                                     | 45,609.10  | 259 | 271 | LEGGSGGDSEVQR               | R | T | 1,290.59 |
| 4176 | BZW1 Isoform 2 of Basic leucine zipper and W2 domain-containing protein 1                                            | IPI00180128,IPI00785096,IPI00916112,IPI00916503,IPI00918019 | 40,522.00  | 260 | 267 | ELQEQMSR                    | K | G | 1,020.48 |
| 4177 | CCT8 T-complex protein 1 subunit theta                                                                               | IPI00784090                                                 | 59,603.00  | 261 | 281 | TAEELMNFSGKEENLMDAQQV<br>K  | K | A | 2,416.10 |
| 4178 | CDK5 Cell division protein kinase 5                                                                                  | IPI00023530                                                 | 33,287.80  | 261 | 268 | DLLQNLLK                    | R | C | 956.5777 |
| 4179 | CDK5 Cell division protein kinase 5                                                                                  | IPI00023530                                                 | 33,287.80  | 261 | 268 | DLLQNLLK                    | R | C | 956.5777 |
| 4180 | CLINT1 Isoform 1 of Clathrin interactor 1                                                                            | IPI00291930                                                 | 68,242.50  | 261 | 274 | HIHIQTATETTTTR              | K | H | 1,609.83 |
| 4181 | CDC2 Putative uncharacterized protein DKFZp686L20222                                                                 | IPI00026689                                                 | 34,762.10  | 261 | 272 | NLDENGLDLSK                 | K | M | 1,330.69 |
| 4182 | DDX56 Probable ATP-dependent RNA helicase DDX56                                                                      | IPI00302281                                                 | 61,573.50  | 261 | 270 | SLLFVNTLER                  | K | S | 1,191.67 |
| 4183 | EIF3D Eukaryotic translation initiation factor 3 subunit D                                                           | IPI00006181,IPI00791086                                     | 63,955.80  | 261 | 271 | SVYSWDIVVQR                 | R | V | 1,351.70 |
| 4184 | EIF3I Eukaryotic translation initiation factor 3 subunit I                                                           | IPI00012795                                                 | 36,484.00  | 262 | 268 | IGKFEAR                     | R | F | 820.4676 |
| 4185 | BLVRA Biliverdin reductase A                                                                                         | IPI00294158                                                 | 33,411.00  | 262 | 275 | LLGQFSEKELAAEK              | K | K | 1,562.84 |
| 4186 | IDE Insulin-degrading enzyme                                                                                         | IPI00220373                                                 | 117,956.00 | 262 | 273 | ESLDDLTLNLVVK               | R | L | 1,345.72 |
| 4187 | FAM98A Protein FAM98A                                                                                                | IPI00174442,IPI00872161                                     | 55,383.40  | 262 | 273 | TTISVAHLLAAR                | K | Q | 1,252.74 |
| 4188 | DDX24 ATP-dependent RNA helicase DDX24                                                                               | IPI00006987                                                 | 96,316.70  | 262 | 278 | NAAPPPSNTTEAPPGETR          | R | T | 1,705.81 |
| 4189 | DDX3X ATP-dependent RNA helicase DDX3X                                                                               | IPI00215637                                                 | 73,227.70  | 263 | 276 | RKQYPISLVLAPTR              | R | E | 1,641.98 |
| 4190 | TUBB2C Tubulin beta-2C chain                                                                                         | IPI00007752                                                 | 49,812.70  | 263 | 276 | LHFFMPGFAPLTSR              | R | G | 1,636.83 |
| 4191 | TUBB2C Tubulin beta-2C chain                                                                                         | IPI00007752                                                 | 49,812.70  | 263 | 276 | LHFFMPGFAPLTSR              | R | G | 1,636.83 |
| 4192 | TUBB2C Tubulin beta-2C chain                                                                                         | IPI00007752                                                 | 49,812.70  | 263 | 276 | LHFFMPGFAPLTSR              | R | G | 1,636.83 |
| 4193 | TUBB Tubulin beta chain                                                                                              | IPI00011654                                                 | 49,652.60  | 263 | 276 | LHFFMPGFAPLTSR              | R | G | 1,636.83 |
| 4194 | TUBB Tubulin beta chain                                                                                              | IPI00011654                                                 | 49,652.60  | 263 | 276 | LHFFMPGFAPLTSR              | R | G | 1,636.83 |
| 4195 | TUBB2A Tubulin beta-2A chain                                                                                         | IPI00013475,IPI00031370                                     | 49,889.10  | 263 | 276 | LHFFMPGFAPLTSR              | R | G | 1,636.83 |
| 4196 | TUBB2A Tubulin beta-2A chain                                                                                         | IPI00013475,IPI00031370                                     | 49,889.10  | 263 | 276 | LHFFMPGFAPLTSR              | R | G | 1,636.83 |
| 4197 | PDE12 Isoform 1 of 2',5'-phosphodiesterase 12                                                                        | IPI00174390,IPI00886797                                     | 67,333.70  | 263 | 282 | ELESVCVVEAGPGTCTFDHR        | R | H | 2,263.01 |
| 4198 | EZR Ezrin                                                                                                            | IPI00746388,IPI00843975,IPI00872684                         | 69,265.40  | 263 | 272 | APDFVIFYAPR                 | K | L | 1,182.59 |
| 4199 | HSPA5 HSPA5 protein                                                                                                  | IPI00003362                                                 | 72,405.60  | 263 | 269 | VMEHFIK                     | R | L | 903.4757 |
| 4200 | FUBP3 Isoform 1 of Far upstream element-binding protein 3                                                            | IPI00377261                                                 | 61,621.90  | 263 | 271 | FAVGIVIGR                   | R | N | 931.5724 |
| 4201 | GRHPR Glyoxylate reductase/hydroxypyruvate reductase                                                                 | IPI00037448                                                 | 35,651.10  | 263 | 286 | IAAAGLDVTSPEPLTNHPLLT<br>LK | K | N | 2,468.38 |
| 4202 | ENO1 Isoform alpha-enolase of Alpha-enolase                                                                          | IPI00465248                                                 | 47,152.20  | 263 | 281 | SPDDPSRYISPDQLADLYK         | K | S | 2,180.05 |
| 4203 | PAICS phosphoribosylaminoimidazole carboxylase, phosphoribosylaminoimidazole succinocarboxamide synthetase isoform 1 | IPI00815732                                                 | 47,941.00  | 263 | 268 | VELLLK                      | R | S | 714.4761 |
| 4204 | PSMD4 Isoform Rpn10A of 26S proteasome non-ATPase regulatory subunit 4                                               | IPI00022694                                                 | 40,719.20  | 263 | 272 | MTISQQEFGR                  | K | T | 1,196.57 |
| 4205 | HNRNPH1 Heterogeneous nuclear ribonucleoprotein H                                                                    | IPI00013881,IPI00479191                                     | 49,211.80  | 263 | 275 | DLNYCFSGMSDHR               | R | Y | 1,601.65 |
| 4206 | HNRNPH1 Heterogeneous nuclear ribonucleoprotein H                                                                    | IPI00013881,IPI00479191                                     | 49,211.80  | 263 | 275 | DLNYCFSGMSDHR               | R | Y | 1,601.65 |
| 4207 | HNRNPH2 Heterogeneous nuclear ribonucleoprotein H2                                                                   | IPI00026230                                                 | 49,246.10  | 263 | 275 | DLNYCFSGMSDHR               | R | Y | 1,601.65 |
| 4208 | HNRNPH2 Heterogeneous nuclear ribonucleoprotein H2                                                                   | IPI00026230                                                 | 49,246.10  | 263 | 275 | DLNYCFSGMSDHR               | R | Y | 1,601.65 |
| 4209 | HNRNPF Heterogeneous nuclear ribonucleoprotein F                                                                     | IPI00003881                                                 | 45,653.80  | 263 | 275 | DLSYCLSGMYDHR               | R | Y | 1,616.68 |



|      |                                                                       |                                                                                      |            |     |     |                                |   |   |          |
|------|-----------------------------------------------------------------------|--------------------------------------------------------------------------------------|------------|-----|-----|--------------------------------|---|---|----------|
| 4210 | SLC25A5 ADP/ATP translocase 2                                         | UPI00007188                                                                          | 32,878.50  | 264 | 272 | DEGGKAFFK                      | R | G | 998.4943 |
| 4211 | SLC25A6 ADP/ATP translocase 3                                         | UPI00291467                                                                          | 32,849.10  | 264 | 272 | DEGGKAFFK                      | R | G | 998.4943 |
| 4212 | - cDNA FLJ54554, highly similar to Pyruvate kinase isozymes M1/M2     | UPI00910979                                                                          | 56,255.30  | 264 | 279 | RFDEILEASDGIMVAR               | R | G | 1,837.91 |
| 4213 | RDX Radixin, isoform CRA_a                                            | UPI00017367,UPI00903145                                                              | 71,032.60  | 264 | 273 | APDFVIFYAPR                    | K | L | 1,182.59 |
| 4214 | MSN Moesin                                                            | UPI00219365,UPI00872814                                                              | 67,803.80  | 264 | 273 | APDFVIFYAPR                    | K | L | 1,182.59 |
| 4215 | DNAJB1 DnaJ homolog subfamily B member 1                              | UPI00015947                                                                          | 38,027.60  | 264 | 279 | EALCGCTVNVPTLDGR               | R | T | 1,761.83 |
| 4216 | TUBA1A Tubulin alpha-1A chain                                         | UPI00180675                                                                          | 50,117.70  | 265 | 280 | IHFPLATYAPVISA EK              | R | A | 1,756.96 |
| 4217 | TUBA1C Tubulin alpha-1C chain                                         | UPI00218343                                                                          | 49,877.40  | 265 | 280 | IHFPLATYAPVISA EK              | R | A | 1,756.96 |
| 4218 | TUBA1B Tubulin alpha-1B chain                                         | UPI00387144,UPI00792677                                                              | 50,133.70  | 265 | 280 | IHFPLATYAPVISA EK              | R | A | 1,756.96 |
| 4219 | DARS Aspartyl-tRNA synthetase, cytoplasmic                            | UPI00216951                                                                          | 57,118.70  | 265 | 273 | VFSIGPVFR                      | K | A | 1,021.58 |
| 4220 | DHPS Isoform Long of Deoxyhypusine synthase                           | UPI00026829                                                                          | 40,953.30  | 265 | 274 | LINTQAIFAK                     | R | C | 1,118.66 |
| 4221 | SF3A3 Splicing factor 3A subunit 3                                    | UPI00029764                                                                          | 58,833.30  | 265 | 273 | SALLALGLK                      | K | C | 885.5769 |
| 4222 | HNRNPA2B1 43 kDa protein                                              | UPI00874030                                                                          | 43,234.30  | 265 | 274 | GGNFGFGDSR                     | R | G | 1,013.44 |
| 4223 | HNRNPA2B1 43 kDa protein                                              | UPI00874030                                                                          | 43,234.30  | 265 | 274 | GGNFGFGDSR                     | R | G | 1,013.44 |
| 4224 | GATAD2B Transcriptional repressor p66-beta                            | UPI00103554                                                                          | 65,243.70  | 265 | 277 | VIAPNPAQLQGQR                  | R | G | 1,391.78 |
| 4225 | WARS Tryptophanyl-tRNA synthetase, cytoplasmic                        | UPI00295400                                                                          | 53,149.60  | 265 | 277 | GIFGFTDSDCIGK                  | K | I | 1,416.65 |
| 4226 | PRKAR1A cAMP-dependent protein kinase type I-alpha regulatory subunit | UPI00021831                                                                          | 42,964.40  | 265 | 281 | LTVADALEPVQFEDGQK              | R | I | 1,859.94 |
| 4227 | HNRNPL Heterogeneous nuclear ribonucleoprotein L                      | UPI00027834                                                                          | 64,114.80  | 265 | 272 | IEYAKPTR                       | K | L | 977.5415 |
| 4228 | HNRNPL Heterogeneous nuclear ribonucleoprotein L                      | UPI00027834                                                                          | 64,114.80  | 265 | 272 | IEYAKPTR                       | K | L | 977.5415 |
| 4229 | PSPC1 Isoform 1 of Paraspeckle component 1                            | UPI00103525,UPI00395775                                                              | 58,726.50  | 265 | 278 | FAQPGTFEFYASR                  | R | W | 1,649.76 |
| 4230 | AP2B1 Isoform 1 of AP-2 complex subunit beta-1                        | UPI00784156,UPI00784366,UPI00790702                                                  | 104,537.20 | 266 | 272 | FLELLPK                        | K | D | 859.5289 |
| 4231 | ATP6V1A V-type proton ATPase catalytic subunit A                      | UPI00007682                                                                          | 68,287.40  | 266 | 280 | YSNSDVIIYVCGGER                | K | G | 1,731.80 |
| 4232 | ZNF503 Isoform 1 of Zinc finger protein 503                           | UPI00304992                                                                          | 62,538.00  | 266 | 283 | GTGGASAEGGPTGLAHGR             | K | I | 1,552.75 |
| 4233 | PFKP 6-phosphofructokinase type C                                     | UPI00009790                                                                          | 85,579.40  | 266 | 287 | LNIIIVAEGAIDTQNKPITSEK         | R | I | 2,367.31 |
| 4234 | FBL rRNA 2'-O-methyltransferase fibrillar                             | UPI00025039                                                                          | 33,766.10  | 266 | 284 | ANCIDSTASAEAVFASEVK            | K | K | 1,969.92 |
| 4235 | UCHL5 Isoform 2 of Ubiquitin carboxyl-terminal hydrolase isozyme L5   | UPI00219512,UPI00219513,UPI002299313,UPI00549820,UPI00549849,UPI00641843,UPI00642374 | 36,061.70  | 266 | 276 | NQMLIEEEVQK                    | K | L | 1,376.67 |
| 4236 | UHRF1 ubiquitin-like with PHD and ring finger domains 1 isoform 2     | UPI00797279,UPI00797945                                                              | 91,082.30  | 267 | 283 | ELYANVVLGDDSLNDCR              | R | I | 1,952.90 |
| 4237 | TCP1 T-complex protein 1 subunit alpha                                | UPI00290566                                                                          | 60,327.20  | 267 | 274 | ESDITKER                       | R | I | 977.4899 |
| 4238 | AP3S1 AP-3 complex subunit sigma-1                                    | UPI00014624                                                                          | 32,126.80  | 267 | 275 | NMNLPEIPR                      | K | N | 1,083.56 |
| 4239 | PKM2 Isoform M1 of Pyruvate kinase isozymes M1/M2                     | UPI00220644,UPI00479186                                                              | 58,044.60  | 267 | 278 | IISKIENHEGVR                   | K | R | 1,394.78 |
| 4240 | EEF1A2 Elongation factor 1-alpha 2                                    | UPI00014424                                                                          | 50,452.60  | 267 | 290 | VETGILRPGMVVTFAPVNITTE R<br>VK | R | S | 2,587.42 |
| 4241 | EEF1A1 Elongation factor 1-alpha 1                                    | UPI00396485                                                                          | 50,123.20  | 267 | 290 | VETGVLPKGMVVTFAPVNVT R<br>TEVK | R | S | 2,515.38 |
| 4242 | EEF1A1 Elongation factor 1-alpha 1                                    | UPI00396485                                                                          | 50,123.20  | 267 | 290 | VETGVLPKGMVVTFAPVNVT R<br>TEVK | R | S | 2,531.38 |
| 4243 | EEF1A1 Elongation factor 1-alpha 1                                    | UPI00396485                                                                          | 50,123.20  | 267 | 290 | VETGVLPKGMVVTFAPVNVT R<br>TEVK | R | S | 2,515.38 |
| 4244 | ATIC Bifunctional purine biosynthesis protein PURH                    | UPI00289499                                                                          | 64,598.50  | 267 | 285 | HVSPAGA AVGIPLSEDEAK           | K | V | 1,847.95 |
| 4245 | PDIA6 Isoform 2 of Protein disulfide-isomerase A6                     | UPI00299571,UPI00644989                                                              | 53,883.90  | 267 | 283 | VKLA AVDATVNQVLASR             | K | Y | 1,755.01 |
| 4246 | LAP3 Isoform 1 of Cytosol aminopeptidase                              | UPI00419237,UPI00789806                                                              | 56,149.70  | 268 | 282 | GSPNANEPLV FVGK                | K | G | 1,525.80 |
| 4247 | YIF1B Isoform 3 of Protein YIF1B                                      | UPI00063544,UPI00735552,UPI00736813                                                  | 33,948.30  | 268 | 280 | ILADAAAEGVPVR                  | K | G | 1,281.72 |
| 4248 | RUVBL1 Isoform 1 of RuvB-like 1                                       | UPI00021187                                                                          | 50,211.40  | 268 | 276 | KTEITDKLR                      | K | G | 1,103.64 |
| 4249 | - cDNA FLJ54408, highly similar to Heat shock 70 kDa protein 1        | UPI00911039                                                                          | 63,907.90  | 268 | 287 | DAKLDKAIHDLVLVGGSTR            | R | I | 2,136.18 |
| 4250 | DHRS7B Dehydrogenase/reductase SDR family member 7B                   | UPI00550165,UPI00871975                                                              | 35,101.90  | 268 | 283 | SPVEVAQDVLA AVGKK              | R | K | 1,610.91 |
| 4251 | PTPN1 Tyrosine-protein phosphatase non-receptor type 1                | UPI00297261                                                                          | 49,949.70  | 269 | 279 | FSYLAVIEGAK                    | R | F | 1,197.65 |

|      |                                                                                                  |                                                 |            |     |     |                         |   |   |          |
|------|--------------------------------------------------------------------------------------------------|-------------------------------------------------|------------|-----|-----|-------------------------|---|---|----------|
| 4252 | PIP4K2C Phosphatidylinositol-5-phosphate 4-kinase type-2 gamma                                   | IPI00152303,IPI00896381                         | 47,268.90  | 269 | 277 | DVEFLVQLK               | R | I | 1,090.61 |
| 4253 | DDX27 Probable ATP-dependent RNA helicase DDX27                                                  | IPI00293078                                     | 89,820.10  | 269 | 279 | TAAFALPVLER             | K | L | 1,187.68 |
| 4254 | NOP5/NOP58 Nucleolar protein 5                                                                   | IPI00006379                                     | 59,562.20  | 269 | 278 | TQLYEYLQNR              | R | M | 1,327.66 |
| 4255 | NOP5/NOP58 Nucleolar protein 5                                                                   | IPI00006379                                     | 59,562.20  | 269 | 278 | TQLYEYLQNR              | R | M | 1,327.66 |
| 4256 | CTPS CTP synthase 1                                                                              | IPI00290142                                     | 66,672.70  | 269 | 276 | RLDLPIER                | R | Q | 1,011.59 |
| 4257 | EIF3I Eukaryotic translation initiation factor 3 subunit I                                       | IPI00012795                                     | 36,484.00  | 269 | 280 | FFHLAFEEEEFGR           | R | V | 1,528.72 |
| 4258 | PDIA6 Isoform 2 of Protein disulfide-isomerase A6                                                | IPI00299571,IPI00644989                         | 53,883.90  | 269 | 283 | LAAVDATVNQVLASR         | K | Y | 1,527.85 |
| 4259 | BUB3 Mitotic checkpoint protein BUB3                                                             | IPI00013468,IPI00514701,IPI00644108             | 37,136.70  | 269 | 274 | LCQFHR                  | R | Y | 860.4196 |
| 4260 | CSE1L Isoform 1 of Exportin-2                                                                    | IPI00022744,IPI00219994                         | 110,403.90 | 269 | 281 | SQICDNaALYAQK           | K | Y | 1,481.71 |
| 4261 | GTF2E2 Transcription initiation factor IIE subunit beta                                          | IPI00019981                                     | 33,027.00  | 270 | 291 | FKTHNEHLAGVLKDYSDITSS K | R | - | 2,490.26 |
| 4262 | - cDNA FLJ52712, highly similar to Tubulin beta-6 chain                                          | IPI00908469                                     | 46,683.90  | 270 | 278 | NMMAACDPR               | R | H | 1,065.43 |
| 4263 | SNX2 Sorting nexin-2                                                                             | IPI00299095                                     | 58,454.20  | 270 | 283 | AVNTQALSGAGILR          | R | M | 1,370.78 |
| 4264 | STK4 Isoform 1 of Serine/threonine-protein kinase 4                                              | IPI00011488,IPI00645585                         | 55,613.30  | 270 | 282 | ATATQLLQHPFVR           | R | S | 1,481.82 |
| 4265 | TCEA1 Isoform 1 of Transcription elongation factor A protein 1                                   | IPI00333215                                     | 33,952.60  | 270 | 279 | NCTYTQVQTR              | K | S | 1,270.58 |
| 4266 | HNRNPA0 Heterogeneous nuclear ribonucleoprotein A0                                               | IPI00011913                                     | 30,822.50  | 270 | 284 | SGGGGGGGSSWGGR          | K | S | 1,192.51 |
| 4267 | HNRNPA0 Heterogeneous nuclear ribonucleoprotein A0                                               | IPI00011913                                     | 30,822.50  | 270 | 284 | SGGGGGGGSSWGGR          | K | S | 1,192.51 |
| 4268 | ENO1 Isoform alpha-enolase of Alpha-enolase                                                      | IPI00465248                                     | 47,152.20  | 270 | 281 | YISPDQLADLYK            | R | S | 1,425.73 |
| 4269 | ENO1 Isoform alpha-enolase of Alpha-enolase                                                      | IPI00465248                                     | 47,152.20  | 270 | 281 | YISPDQLADLYK            | R | S | 1,425.73 |
| 4270 | DNAJB6 Isoform A of DnaJ homolog subfamily B member 6                                            | IPI00024523                                     | 36,070.20  | 271 | 287 | HAPHCLSEEEGEQDRPR       | R | A | 2,046.90 |
| 4271 | PHGDH D-3-phosphoglycerate dehydrogenase                                                         | IPI00011200                                     | 56,632.60  | 271 | 289 | ALVDHENVISCPHLGASTK     | R | E | 2,048.02 |
| 4272 | LCLAT1 Isoform 1 of Lysocardiolipin acyltransferase                                              | IPI00419643,IPI00456786,IPI00910254             | 48,904.20  | 271 | 279 | HLLQGDFPR               | K | E | 1,082.57 |
| 4273 | DDX59 Isoform 2 of Probable ATP-dependent RNA helicase DDX59                                     | IPI00010449,IPI00217157                         | 64,554.60  | 271 | 281 | TPSALILPTR              | K | E | 1,169.69 |
| 4274 | - cDNA FLJ54408, highly similar to Heat shock 70 kDa protein 1                                   | IPI00911039                                     | 63,907.90  | 271 | 287 | LDKAQIHDLVLVGGSTR       | K | I | 1,822.02 |
| 4275 | OLA1 Isoform 1 of Obg-like ATPase 1                                                              | IPI00290416,IPI00916847                         | 44,727.40  | 271 | 279 | LQELSAEER               | K | Q | 1,074.54 |
| 4276 | PRIM2 Isoform 1 of DNA primase large subunit                                                     | IPI00027705                                     | 58,791.20  | 271 | 282 | ISLDQIDLLSTK            | K | S | 1,345.76 |
| 4277 | KIF2A Isoform 1 of Kinesin-like protein KIF2A                                                    | IPI00010368,IPI00848334,IPI00867529,IPI00867746 | 77,731.80  | 272 | 284 | FTARPLVETIFER           | R | G | 1,578.86 |
| 4278 | NAPA Alpha-soluble NSF attachment protein                                                        | IPI00009253                                     | 33,216.10  | 272 | 282 | LDQWLTTMLLR             | R | I | 1,405.75 |
| 4279 | GAPDH Glyceraldehyde-3-phosphate dehydrogenase                                                   | IPI00219018                                     | 36,035.30  | 272 | 309 | GILGYTEHQVVSDFNSDTHS K  | R | L | 4,036.90 |
| 4280 | EHD4 EH domain-containing protein 4                                                              | IPI00005578                                     | 61,159.60  | 273 | 283 | LFEAEAQDLFR             | R | D | 1,338.67 |
| 4281 | STUB1 Isoform 1 of STIP1 homology and U box-containing protein 1                                 | IPI00025156                                     | 34,839.00  | 273 | 287 | SPLTQEQLIPNLAMK         | R | E | 1,682.91 |
| 4282 | SLC25A5 ADP/ATP translocase 2                                                                    | IPI00007188                                     | 32,878.50  | 273 | 280 | GAWSNVLR                | K | G | 902.4842 |
| 4283 | SLC25A6 ADP/ATP translocase 3                                                                    | IPI00291467                                     | 32,849.10  | 273 | 280 | GAWSNVLR                | K | G | 902.4842 |
| 4284 | DDX17 DEAD box polypeptide 17 isoform 1                                                          | IPI00023785,IPI00651653                         | 80,256.00  | 273 | 284 | LKSTCIYGGAPK            | R | G | 1,294.68 |
| 4285 | PFKM cDNA FLJ44241 fis, clone THYMU3008436, highly similar to 6-phosphofructokinase, muscle type | IPI00465179,IPI00743142                         | 93,203.30  | 273 | 281 | TFVLEVMGR               | R | H | 1,051.56 |
| 4286 | ACAT2 Acetyl-CoA acetyltransferase, cytosolic                                                    | IPI00291419                                     | 41,332.40  | 273 | 279 | GLTPLAR                 | R | I | 727.4462 |
| 4287 | CDC2 Putative uncharacterized protein DKFZp686L20222                                             | IPI00026689                                     | 34,762.10  | 273 | 281 | MLIYDPAKR               | K | I | 1,122.60 |
| 4288 | CCT6A T-complex protein 1 subunit zeta                                                           | IPI00027626,IPI00552590                         | 58,007.30  | 273 | 279 | KIIElKR                 | K | K | 899.6038 |
| 4289 | TKT cDNA FLJ54957, highly similar to Transketolase                                               | IPI00643920                                     | 68,725.40  | 273 | 289 | NMAEQIIQEIYSQIQSK       | K | K | 2,039.01 |
| 4290 | DCTN2 dynactin 2                                                                                 | IPI00220503,IPI00789792                         | 44,802.30  | 273 | 287 | VSALDLAVLDQVEAR         | K | L | 1,598.87 |

|      |                                                                                 |                                                                                     |           |     |     |                                      |   |   |          |
|------|---------------------------------------------------------------------------------|-------------------------------------------------------------------------------------|-----------|-----|-----|--------------------------------------|---|---|----------|
| 4291 | NONO Non-POU domain-containing octamer-binding protein                          | IPI00304596                                                                         | 54,213.60 | 273 | 287 | ALIEMEKQQQDQVDR                      | K | N | 1,830.90 |
| 4292 | IGF2BP1 Insulin-like growth factor 2 mRNA-binding protein 1                     | IPI00008557                                                                         | 63,438.30 | 273 | 280 | TADDEVPLK                            | K | T | 872.4725 |
| 4293 | - cDNA FLJ54408, highly similar to Heat shock 70 kDa protein 1                  | IPI00911039                                                                         | 63,907.90 | 274 | 287 | AQIHDLVLVGGSTR                       | K | I | 1,465.81 |
| 4294 | HNRPDL Isoform 1 of Heterogeneous nuclear ribonucleoprotein D-like              | IPI00011274,IPI00045498,IPI00845282                                                 | 46,420.60 | 274 | 289 | RGFCFITYTDEEPVKK                     | R | L | 1,989.97 |
| 4295 | HSP90AB1 Heat shock protein HSP 90-beta                                         | IPI00414676                                                                         | 83,249.30 | 274 | 284 | EKYIDQEELNK                          | K | T | 1,408.70 |
| 4296 | PSMD3 26S proteasome non-ATPase regulatory subunit 3                            | IPI00011603                                                                         | 60,961.60 | 274 | 287 | SVFPEQANNNEWAR                       | K | Y | 1,661.77 |
| 4297 | CDK5 Cell division protein kinase 5                                             | IPI00023530                                                                         | 33,287.80 | 275 | 292 | ISAEELQHPYFSDFCPP                    | R | - | 2,107.94 |
| 4298 | VDAC1 Voltage-dependent anion-selective channel protein 1                       | IPI00216308                                                                         | 30,755.90 | 275 | 283 | LGLGLEFQA                            | K | - | 947.5198 |
| 4299 | HNRNPA2B1 43 kDa protein                                                        | IPI00874030                                                                         | 43,234.30 | 275 | 289 | GGGGNFGPGPSNFR                       | R | G | 1,377.63 |
| 4300 | SMU1 WD40 repeat-containing protein SMU1                                        | IPI00305833                                                                         | 57,526.80 | 275 | 287 | DTEMLATGAQDGK                        | R | I | 1,336.61 |
| 4301 | GNB2L1 38 kDa protein                                                           | IPI00641950,IPI00848226                                                             | 37,740.10 | 275 | 286 | YWLCAATGPSIK                         | R | I | 1,366.68 |
| 4302 | ILF3 Isoform 1 of Interleukin enhancer-binding factor 3                         | IPI00298788                                                                         | 95,320.90 | 275 | 308 | VLECLASGIVMPDGSGIYDPC                | R | Q | 3,704.72 |
| 4303 | HNRNPH1 Heterogeneous nuclear ribonucleoprotein H                               | IPI00013881,IPI00479191                                                             | 49,211.80 | 276 | 294 | EKEATDAIGHLDR<br>YDGGGSTFQSTTGHCVHMR | R | G | 2,113.88 |
| 4304 | HNRNPH1 Heterogeneous nuclear ribonucleoprotein H                               | IPI00013881,IPI00479191                                                             | 49,211.80 | 276 | 294 | YDGGGSTFQSTTGHCVHMR                  | R | G | 2,113.88 |
| 4305 | HNRNPF Heterogeneous nuclear ribonucleoprotein F                                | IPI00003881                                                                         | 45,653.80 | 276 | 294 | YGDSEFTVQSTTGHCVHMR                  | R | G | 2,211.95 |
| 4306 | TRIP13 Isoform 1 of Thyroid receptor-interacting protein 13                     | IPI00003505                                                                         | 48,534.10 | 276 | 289 | VVNAVLTQIDQIKR                       | R | H | 1,596.94 |
| 4307 | NUDC Nuclear migration protein nudC                                             | IPI00550746                                                                         | 38,225.70 | 276 | 284 | LSDLSETR                             | K | S | 1,035.50 |
| 4308 | HSP90AA1 heat shock protein 90kDa alpha (cytosolic), class A member 1 isoform 1 | IPI00382470,IPI00784295                                                             | 98,147.10 | 276 | 295 | HNDDEQYAWESSAGGSFTV                  | K | T | 2,255.96 |
| 4309 | HSP90AB1 Heat shock protein HSP 90-beta                                         | IPI00414676                                                                         | 83,249.30 | 276 | 284 | YIDQEELNK                            | K | T | 1,151.56 |
| 4310 | PES1 Isoform 1 of Pescadillo homolog 1                                          | IPI00003768,IPI00554461,IPI00878536                                                 | 67,986.90 | 276 | 285 | LAALSALAR                            | K | V | 972.5836 |
| 4311 | XPNPEP1 Isoform 2 of Xaa-Pro aminopeptidase 1                                   | IPI00607814,IPI00645898,IPI00793375                                                 | 67,210.10 | 277 | 285 | ALCADLSPR                            | K | E | 1,002.50 |
| 4312 | LMNB1 Lamin-B1                                                                  | IPI00217975                                                                         | 66,391.60 | 277 | 290 | LSSEMNTSTVNSAR                       | R | E | 1,512.70 |
| 4313 | ANXA5 Annexin A5                                                                | IPI00329801,IPI00872379                                                             | 35,920.60 | 277 | 286 | SEIDLFNIRK                           | R | E | 1,234.68 |
| 4314 | GNL3L Guanine nucleotide-binding protein-like 3-like protein                    | IPI00005132,IPI00871959                                                             | 65,555.30 | 277 | 288 | ACSVGAVPGITK                         | R | F | 1,159.61 |
| 4315 | DDX3X ATP-dependent RNA helicase DDX3X                                          | IPI00215637                                                                         | 73,227.70 | 277 | 287 | ELAVQIYEER                           | R | K | 1,320.68 |
| 4316 | SRM Spermidine synthase                                                         | IPI00292020                                                                         | 33,806.50 | 278 | 285 | YNSDVHR                              | K | A | 1,053.47 |
| 4317 | PDLIM1 PDZ and LIM domain protein 1                                             | IPI00010414                                                                         | 36,053.30 | 278 | 294 | HRHPECYVCTDCGTNLK                    | R | Q | 2,146.92 |
| 4318 | G3BP2 Isoform A of Ras GTPase-activating protein-binding protein 2              | IPI00009057,IPI00179890                                                             | 54,102.30 | 278 | 290 | VEAKPEVQSQPPR                        | R | V | 1,464.78 |
| 4319 | TCP1 T-complex protein 1 subunit alpha                                          | IPI00290566                                                                         | 60,327.20 | 278 | 298 | ILATGANVILTTGGIDDMCLK                | K | Y | 2,192.13 |
| 4320 | BLVRA Biliverdin reductase A                                                    | IPI00294158                                                                         | 33,411.00 | 278 | 290 | ILHCLGLAEEIQK                        | R | Y | 1,523.83 |
| 4321 | PKM2 Isoform M1 of Pyruvate kinase isozymes M1/M2                               | IPI00220644,IPI00479186                                                             | 58,044.60 | 279 | 294 | RFDEILEASDGIMVAR                     | R | G | 1,837.91 |
| 4322 | AOF2 Isoform 2 of Lysine-specific histone demethylase 1                         | IPI00217540,IPI00456631                                                             | 95,137.70 | 279 | 289 | HGLINFGIYKR                          | R | I | 1,317.74 |
| 4323 | HNRNPK Isoform 1 of Heterogeneous nuclear ribonucleoprotein K                   | IPI00216049,IPI00216746,IPI00807545,IPI00910458                                     | 50,960.50 | 279 | 286 | DYDDMSPR                             | R | R | 1,014.38 |
| 4324 | AKR7A2 Aflatoxin B1 aldehyde reductase member 2                                 | IPI00305978                                                                         | 39,571.00 | 279 | 297 | ALQAAYGASAPSVTSAALR                  | K | W | 1,804.96 |
| 4325 | RANGAP1 Ran GTPase-activating protein 1                                         | IPI00294879                                                                         | 63,525.30 | 280 | 289 | GAVAIADAIR                           | K | G | 956.5524 |
| 4326 | SFPQ Isoform Long of Splicing factor, proline- and glutamine-rich               | IPI00010740                                                                         | 76,131.50 | 280 | 286 | ANLSLLR                              | K | R | 786.4832 |
| 4327 | UCLH5 Isoform 2 of Ubiquitin carboxyl-terminal hydrolase isozyme L5             | IPI00219512,IPI00219513,IPI00299313,IPI00549820,IPI00549849,IPI00641843,IPI00642374 | 36,061.70 | 280 | 286 | YKIENIR                              | R | R | 935.5309 |
| 4328 | PGK1 Phosphoglycerate kinase 1                                                  | IPI00169383                                                                         | 44,597.30 | 280 | 297 | ITLPVDFVTADKFDENAK                   | K | T | 2,023.04 |
| 4329 | - cDNA FLJ54554, highly similar to Pyruvate kinase isozymes M1/M2               | IPI00910979                                                                         | 56,255.30 | 280 | 290 | GDLGIEIPAEEK                         | R | V | 1,141.61 |

|      |                                                                                |                                     |            |     |     |                              |   |   |          |
|------|--------------------------------------------------------------------------------|-------------------------------------|------------|-----|-----|------------------------------|---|---|----------|
| 4330 | TUBA1A Tubulin alpha-1A chain                                                  | IPI00180675                         | 50,117.70  | 281 | 304 | AYHEQLSVAEITNACFEPANQ<br>MVK | K | C | 2,766.29 |
| 4331 | TUBA1A Tubulin alpha-1A chain                                                  | IPI00180675                         | 50,117.70  | 281 | 304 | AYHEQLSVAEITNACFEPANQ<br>MVK | K | C | 2,766.29 |
| 4332 | TUBA1B Tubulin alpha-1B chain                                                  | IPI00387144,IPI00792677             | 50,133.70  | 281 | 304 | AYHEQLSVAEITNACFEPANQ<br>MVK | K | C | 2,766.29 |
| 4333 | TUBA1C Tubulin alpha-1C chain                                                  | IPI00218343                         | 49,877.40  | 281 | 304 | AYHEQLTVAEITNACFEPANQ<br>MVK | K | C | 2,780.30 |
| 4334 | WDR82 WD repeat-containing protein 82                                          | IPI00152695                         | 35,062.40  | 281 | 293 | HTGPITCLQFNPK                | K | F | 1,512.76 |
| 4335 | LMNA Isoform A of Lamin-A/C                                                    | IPI00021405                         | 74,122.60  | 281 | 296 | NSNLVGAHAHEELQQSR            | R | I | 1,752.86 |
| 4336 | EIF3I Eukaryotic translation initiation factor 3 subunit I                     | IPI00012795                         | 36,484.00  | 281 | 298 | VKGHFGPINSVAFHPDGK           | R | S | 1,906.99 |
| 4337 | RQCD1 Cell differentiation protein RCD1 homolog                                | IPI00023101                         | 33,614.20  | 282 | 292 | NLQEGQVTDPR                  | K | G | 1,256.62 |
| 4338 | NUFIP2 Nuclear fragile X mental retardation-interacting protein 2              | IPI00002349                         | 76,103.10  | 282 | 291 | YETGPGGTSR                   | K | G | 1,024.47 |
| 4339 | EXOSC9 Isoform 2 of Exosome complex exonuclease RRP45                          | IPI00029697,IPI00654592             | 50,786.00  | 282 | 292 | FGFAESIANQR                  | K | I | 1,239.61 |
| 4340 | COPB2 Coatomer subunit beta'                                                   | IPI00220219                         | 102,471.10 | 282 | 298 | GSNNVALGYDEGSIIVK            | R | L | 1,735.89 |
| 4341 | IK Protein Red                                                                 | IPI00011875,IPI00883647             | 65,615.20  | 282 | 290 | LTQILSYLR                    | K | Q | 1,106.66 |
| 4342 | CCT8 T-complex protein 1 subunit theta                                         | IPI00784090                         | 59,603.00  | 282 | 296 | AIADTGANVVVTGGK              | K | V | 1,372.74 |
| 4343 | CSE1L Isoform 1 of Exportin-2                                                  | IPI00022744,IPI00219994             | 110,403.90 | 282 | 288 | YDEEFQR                      | K | Y | 986.4214 |
| 4344 | ILVBL Isoform 1 of Acetolactate synthase-like protein                          | IPI00554541,IPI00556135             | 67,849.10  | 283 | 305 | AKRPLMVLGSQLLTPTSADK<br>LR   | R | A | 2,482.42 |
| 4345 | XRCC5 ATP-dependent DNA helicase 2 subunit 2                                   | IPI00220834,IPI00871391             | 82,689.10  | 283 | 291 | TLKKEDIQK                    | K | E | 1,102.65 |
| 4346 | TUBB2C Tubulin beta-2C chain                                                   | IPI00007752                         | 49,812.70  | 283 | 297 | ALTVPELTQQMFDAK              | R | N | 1,691.87 |
| 4347 | TUBB2C Tubulin beta-2C chain                                                   | IPI00007752                         | 49,812.70  | 283 | 297 | ALTVPELTQQMFDAK              | R | N | 1,707.86 |
| 4348 | TUBB2A Tubulin beta-2A chain                                                   | IPI00013475,IPI00031370             | 49,889.10  | 283 | 297 | ALTVPELTQQMFDSK              | R | N | 1,723.86 |
| 4349 | TUBB2A Tubulin beta-2A chain                                                   | IPI00013475,IPI00031370             | 49,889.10  | 283 | 297 | ALTVPELTQQMFDSK              | R | N | 1,723.86 |
| 4350 | TUBB Tubulin beta chain                                                        | IPI00011654                         | 49,652.60  | 283 | 297 | ALTVPELTQQVFDAK              | R | N | 1,659.90 |
| 4351 | TUBB Tubulin beta chain                                                        | IPI00011654                         | 49,652.60  | 283 | 297 | ALTVPELTQQVFDAK              | R | N | 1,659.90 |
| 4352 | RBMX Heterogeneous nuclear ribonucleoprotein G                                 | IPI00304692                         | 42,315.70  | 283 | 292 | DSYESYGNSR                   | R | S | 1,177.48 |
| 4353 | VIM Vimentin                                                                   | IPI00418471                         | 53,634.60  | 283 | 292 | NLQEAEEWYK                   | K | S | 1,309.61 |
| 4354 | AARS Alanyl-tRNA synthetase, cytoplasmic                                       | IPI00027442,IPI00910701             | 106,795.20 | 283 | 296 | VGAEDADGIDMAYR               | K | V | 1,498.65 |
| 4355 | ZNF503 Isoform 1 of Zinc finger protein 503                                    | IPI00304992                         | 62,538.00  | 284 | 305 | ISCGGGINVDVNHQHPDGGPG<br>GK  | R | A | 2,134.99 |
| 4356 | DNAJA1 DnaJ homolog subfamily A member 1                                       | IPI00012535                         | 44,850.60  | 284 | 296 | TIVITSHPGQIVK                | R | H | 1,392.82 |
| 4357 | HSDL2 Isoform 2 of Hydroxysteroid dehydrogenase-like protein 2                 | IPI00031107,IPI00414384             | 45,378.60  | 284 | 298 | KVESTGAVPEFKEEK              | K | L | 1,677.87 |
| 4358 | ATP6V1H Isoform 1 of V-type proton ATPase subunit H                            | IPI00296191,IPI00414079,IPI00909198 | 55,865.40  | 284 | 290 | IILAAFR                      | R | N | 803.5138 |
| 4359 | PPP2CA Serine/threonine-protein phosphatase 2A catalytic subunit alpha isoform | IPI00008380                         | 35,576.50  | 284 | 294 | YSFLQFDPAPR                  | K | R | 1,340.66 |
| 4360 | PPP2CA Serine/threonine-protein phosphatase 2A catalytic subunit alpha isoform | IPI00008380                         | 35,576.50  | 284 | 294 | YSFLQFDPAPR                  | K | R | 1,340.66 |
| 4361 | HSPA9 Stress-70 protein, mitochondrial                                         | IPI00007765                         | 73,663.30  | 285 | 292 | HIVKEFKR                     | R | E | 1,056.63 |
| 4362 | OSBPL11 Oxysterol-binding protein-related protein 11                           | IPI00032970,IPI00789006             | 83,625.30  | 285 | 299 | GSLPSGTTIEWLEPK              | K | I | 1,614.84 |
| 4363 | TRUB2 Probable tRNA pseudouridine synthase 2                                   | IPI00024151                         | 36,677.20  | 285 | 296 | AATPQVAEELEK                 | R | S | 1,227.66 |
| 4364 | MCCC1 Methylcrotonoyl-CoA carboxylase subunit alpha, mitochondrial             | IPI00024580,IPI00792499             | 80,455.60  | 285 | 295 | IIEAPAPGIK                   | K | S | 1,137.65 |
| 4365 | PSMC2 26S protease regulatory subunit 7                                        | IPI00021435                         | 48,617.60  | 285 | 297 | FDDGAGGDNEVQR                | R | T | 1,379.58 |
| 4366 | NAPA Alpha-soluble NSF attachment protein                                      | IPI00009253                         | 33,216.10  | 286 | 295 | TIQGDEEDLR                   | K | - | 1,175.55 |
| 4367 | LCP1 Plastin-2                                                                 | IPI00010471                         | 70,274.10  | 286 | 297 | IGNFSTDIKDSK                 | K | A | 1,324.67 |
| 4368 | FBL rRNA 2'-O-methyltransferase fibrillar                                      | IPI00025039                         | 33,766.10  | 286 | 304 | MQQENMKPQEQLTLEPYER          | K | D | 2,424.12 |
| 4369 | KIAA1279 KIF1-binding protein                                                  | IPI00477355                         | 71,797.70  | 286 | 306 | ISATEDTPEAEGEVPPELYHQR       | K | K | 2,371.11 |
| 4370 | CDC2 Putative uncharacterized protein DKFZp686L20222                           | IPI00026689                         | 34,762.10  | 286 | 301 | MALNHPYFNLDLNQIK             | K | K | 1,948.92 |

|      |                                                                          |                                                 |           |     |     |                                                |   |   |          |
|------|--------------------------------------------------------------------------|-------------------------------------------------|-----------|-----|-----|------------------------------------------------|---|---|----------|
| 4371 | SSB Lupus La protein                                                     | IPI00009032,IPI00916802                         | 46,821.00 | 286 | 297 | AKDANNGNLQLR                                   | K | N | 1,313.69 |
| 4372 | KPNA2;LOC728860 Importin subunit alpha-2                                 | IPI00002214,IPI00789457                         | 57,844.50 | 286 | 291 | IGMVVK                                         | R | T | 646.3957 |
| 4373 | DDX24 ATP-dependent RNA helicase DDX24                                   | IPI00006987                                     | 96,316.70 | 287 | 318 | SPGKAEAESDALPDDTVIESE<br>ALPSDIAAEAR<br>AFNLVK | R | A | 3,254.56 |
| 4374 | U2AF2 Isoform 1 of Splicing factor U2AF 65 kDa subunit                   | IPI00031556,IPI00830039                         | 53,483.10 | 287 | 292 |                                                | K | D | 691.4137 |
| 4375 | CSDE1 Isoform Long of Cold shock domain-containing protein E1            | IPI00470891,IPI00844264,IPI00873244             | 88,867.00 | 287 | 295 | IKVDFVIK                                       | R | E | 1,058.66 |
| 4376 | DDX21 Isoform 1 of Nucleolar RNA helicase 2                              | IPI00015953                                     | 87,328.00 | 287 | 304 | LSVACFYGGTPYGGQFER                             | K | M | 2,008.92 |
| 4377 | HNRNP3 Isoform 1 of Heterogeneous nuclear ribonucleoprotein H3           | IPI00013877,IPI00216492                         | 36,909.60 | 288 | 301 | DGMDNQGGYGSVGR                                 | R | M | 1,412.59 |
| 4378 | SSB Lupus La protein                                                     | IPI00009032,IPI00916802                         | 46,821.00 | 288 | 297 | DANNGNLQLR                                     | K | N | 1,114.56 |
| 4379 | PFKP 6-phosphofructokinase type C                                        | IPI00009790                                     | 85,579.40 | 288 | 301 | IKELVVTQLGYDTR                                 | K | V | 1,634.91 |
| 4380 | EEF2 Elongation factor 2                                                 | IPI00186290                                     | 95,322.10 | 288 | 299 | TFCQLLDPIFK                                    | R | V | 1,494.80 |
| 4381 | WDR61 WD repeat-containing protein 61                                    | IPI00019269                                     | 33,562.80 | 289 | 305 | IVSVGDDQEIHIYDCPI                              | K | - | 1,972.93 |
| 4382 | PLS3 plastin 3                                                           | IPI00216694                                     | 70,795.90 | 289 | 300 | INNFSADIKDSK                                   | K | A | 1,351.69 |
| 4383 | PLS3 plastin 3                                                           | IPI00216694                                     | 70,795.90 | 289 | 297 | INNFSADIK                                      | K | D | 1,021.53 |
| 4384 | DDX1 ATP-dependent RNA helicase DDX1                                     | IPI00293655                                     | 82,415.10 | 289 | 296 | ALIVEPSR                                       | K | E | 884.52   |
| 4385 | TARS Threonyl-tRNA synthetase, cytoplasmic                               | IPI00329633,IPI00908949                         | 83,419.80 | 289 | 296 | ADMETLQR                                       | K | I | 979.4515 |
| 4386 | IGF2BP2 insulin-like growth factor 2 mRNA binding protein 2 isoform a    | IPI00179713,IPI00180983,IPI00743914             | 66,104.40 | 289 | 295 | LIGKEGR                                        | R | N | 772.4677 |
| 4387 | LTA4H Isoform 1 of Leukotriene A-4 hydrolase                             | IPI00219077                                     | 69,269.10 | 289 | 310 | SLSNVIAEISHSWTGNLVTN<br>K                      | K | T | 2,407.24 |
| 4388 | RARS Isoform Complexed of Arginyl-tRNA synthetase, cytoplasmic           | IPI00004860                                     | 75,364.00 | 290 | 306 | AYQCVVLLQGKNPDITK                              | R | A | 1,947.04 |
| 4389 | PRPF19 Pre-mRNA-processing factor 19                                     | IPI00004968                                     | 55,163.30 | 290 | 303 | IWSVNPASCVQVVR                                 | R | A | 1,614.84 |
| 4390 | PON2 Isoform 1 of Serum paraoxonase/arylesterase 2                       | IPI00014958,IPI00290945,IPI00742670,IPI00844348 | 39,380.70 | 290 | 305 | LFVYDPNPPSSEVLR                                | K | I | 1,846.93 |
| 4391 | UFD1L Isoform Short of Ubiquitin fusion degradation protein 1 homolog    | IPI00218292,IPI00655754,IPI00873326             | 34,483.20 | 290 | 301 | FVAFSGEGQSLR                                   | R | K | 1,297.65 |
| 4392 | RARS Isoform Complexed of Arginyl-tRNA synthetase, cytoplasmic           | IPI00004860                                     | 75,364.00 | 290 | 300 | AYQCVVLLQGK                                    | R | N | 1,278.69 |
| 4393 | GSPT1 G1 to S phase transition 1 isoform 2                               | IPI00909083,IPI00910513                         | 68,555.00 | 290 | 300 | HFTILDAPGHK                                    | K | S | 1,235.65 |
| 4394 | PFKP 6-phosphofructokinase type C                                        | IPI00009790                                     | 85,579.40 | 290 | 301 | ELVVTQLGYDTR                                   | K | V | 1,393.73 |
| 4395 | HSPD1 60 kDa heat shock protein, mitochondrial                           | IPI00784154                                     | 61,037.70 | 291 | 301 | LKVGLQVVAVK                                    | R | A | 1,153.77 |
| 4396 | ALDH3A2 Isoform 1 of Fatty aldehyde dehydrogenase                        | IPI00333619,IPI00394758                         | 54,831.80 | 291 | 299 | ILSLEGGK                                       | R | I | 1,000.60 |
| 4397 | DBR1 Isoform 1 of Lariat debranching enzyme                              | IPI00305545                                     | 61,538.00 | 291 | 301 | ATDDLINVTGR                                    | R | L | 1,174.61 |
| 4398 | TKT cDNA FLJ54957, highly similar to Transketolase                       | IPI00643920                                     | 68,725.40 | 291 | 310 | KILATPPQEDAPSVDIANIR                           | K | M | 2,148.17 |
| 4399 | IGF2BP1 Insulin-like growth factor 2 mRNA-binding protein 1              | IPI00008557                                     | 63,438.30 | 291 | 297 | LIGKEGR                                        | R | N | 772.4677 |
| 4400 | IGF2BP3 Isoform 1 of Insulin-like growth factor 2 mRNA-binding protein 3 | IPI00658000                                     | 63,702.90 | 291 | 297 | LIGKEGR                                        | R | N | 772.4677 |
| 4401 | KPNA6 cDNA FLJ53229, highly similar to Importin alpha-7 subunit          | IPI00747764                                     | 60,563.50 | 292 | 303 | IQAVIDSGVCRR                                   | K | L | 1,373.73 |
| 4402 | TKT cDNA FLJ54957, highly similar to Transketolase                       | IPI00643920                                     | 68,725.40 | 292 | 310 | ILATPPQEDAPSVDIANIR                            | K | M | 2,020.07 |
| 4403 | SF3A3 Splicing factor 3A subunit 3                                       | IPI00029764                                     | 58,833.30 | 292 | 303 | SLESLDTSLFAK                                   | K | N | 1,310.68 |
| 4404 | KPNA6 cDNA FLJ53229, highly similar to Importin alpha-7 subunit          | IPI00747764                                     | 60,563.50 | 292 | 302 | IQAVIDSGVCR                                    | K | R | 1,217.63 |
| 4405 | HSP90AB1 Heat shock protein HSP 90-beta                                  | IPI00414676                                     | 83,249.30 | 292 | 306 | NPDDITQEEYGEFYK                                | R | S | 1,847.80 |
| 4406 | MAT2B Isoform 1 of Methionine adenosyltransferase 2 subunit beta         | IPI00002324                                     | 37,533.60 | 292 | 308 | NAQLDCSKLETLGIGQR                              | R | T | 1,902.97 |
| 4407 | NDNL2 Melanoma-associated antigen G1                                     | IPI00217104                                     | 34,291.10 | 293 | 304 | ARQPSPGAPSS                                    | R | - | 1,151.58 |
| 4408 | LRRCS9 Leucine-rich repeat-containing protein 59                         | IPI00396321                                     | 34,913.40 | 293 | 307 | RHEILQWVLQTDSSQ                                | R | - | 1,880.96 |
| 4409 | HSPD1 60 kDa heat shock protein, mitochondrial                           | IPI00784154                                     | 61,037.70 | 293 | 301 | VGLQVVAVK                                      | K | A | 912.5877 |
| 4410 | HSPD1 60 kDa heat shock protein, mitochondrial                           | IPI00784154                                     | 61,037.70 | 293 | 301 | VGLQVVAVK                                      | K | A | 912.5877 |



|      |                                                                                                                            |                                                                                                                 |            |     |     |                            |   |   |          |
|------|----------------------------------------------------------------------------------------------------------------------------|-----------------------------------------------------------------------------------------------------------------|------------|-----|-----|----------------------------|---|---|----------|
| 4411 | USO1 Putative uncharacterized protein<br>DKFZp451D234                                                                      | IPI00031583                                                                                                     | 109,171.10 | 293 | 309 | VLVSPTNPPGATSSCQK          | R | A | 1,742.87 |
| 4412 | CCT7 T-complex protein 1 subunit eta                                                                                       | IPI00018465                                                                                                     | 59,349.80  | 293 | 306 | LPIGDVATQYFADR             | K | D | 1,565.80 |
| 4413 | PFKL Isoform 1 of 6-phosphofructokinase, liver type                                                                        | IPI00332371,IPI00902982                                                                                         | 85,001.20  | 293 | 301 | VTVLGHVQR                  | R | G | 1,008.59 |
| 4414 | PRPSAP2 Phosphoribosyl pyrophosphate<br>synthetase-associated protein 2                                                    | IPI00003168                                                                                                     | 40,908.60  | 293 | 308 | IFVMATHGLSSDAPR            | K | R | 1,730.89 |
| 4415 | SMU1 WD40 repeat-containing protein SMU1                                                                                   | IPI00305833                                                                                                     | 57,526.80  | 293 | 300 | IQSGQCLR                   | K | R | 961.4885 |
| 4416 | UBAP2L Isoform 2 of Ubiquitin-associated protein 2-<br>like                                                                | IPI00029019,IPI00181306,IPI00514856,IPI00646016                                                                 | 104,959.10 | 293 | 301 | IDLAVLLGK                  | R | T | 941.6032 |
| 4417 | UBAC2 Isoform 2 of Ubiquitin-associated domain-<br>containing protein 2                                                    | IPI00007034,IPI00168284,IPI00829996                                                                             | 34,858.90  | 294 | 309 | ASNNDLNVATNFLQHQ           | R | - | 1,770.88 |
| 4418 | CCT3 chaperonin containing TCP1, subunit 3<br>isoform b                                                                    | IPI00290770,IPI00553185                                                                                         | 60,446.30  | 294 | 305 | GISDLAQHYLMR               | K | A | 1,403.71 |
| 4419 | CCT3 chaperonin containing TCP1, subunit 3<br>isoform b                                                                    | IPI00290770,IPI00553185                                                                                         | 60,446.30  | 294 | 305 | GISDLAQHYLMR               | K | A | 1,419.71 |
| 4420 | GNB2L1 38 kDa protein                                                                                                      | IPI00641950,IPI00848226                                                                                         | 37,740.10  | 294 | 309 | IIVDELKQEVISTSSK           | K | A | 1,789.00 |
| 4421 | GNB2L1 38 kDa protein                                                                                                      | IPI00641950,IPI00848226                                                                                         | 37,740.10  | 294 | 309 | IIVDELKQEVISTSSK           | K | A | 1,789.00 |
| 4422 | - cDNA FLJ54408, highly similar to Heat shock 70<br>kDa protein 1                                                          | IPI00911039                                                                                                     | 63,907.90  | 294 | 302 | LLQDFFDGR                  | K | D | 1,110.56 |
| 4423 | NONO Non-POU domain-containing octamer-<br>binding protein                                                                 | IPI00304596                                                                                                     | 54,213.60  | 294 | 304 | EKLEMEEAAR                 | R | H | 1,368.61 |
| 4424 | GOT1 Aspartate aminotransferase, cytoplasmic                                                                               | IPI00219029                                                                                                     | 46,230.10  | 294 | 305 | ITWSNPPAQGAR               | R | I | 1,297.66 |
| 4425 | DDX17 DEAD box polypeptide 17 isoform 1                                                                                    | IPI00023785,IPI00651653                                                                                         | 80,256.00  | 294 | 304 | GVEICIATPGR                | R | L | 1,172.61 |
| 4426 | - cDNA FLJ54408, highly similar to Heat shock 70<br>kDa protein 1                                                          | IPI00911039                                                                                                     | 63,907.90  | 294 | 306 | LLQDFFDGRDLNK              | K | S | 1,580.81 |
| 4427 | PAICS phosphoribosylaminoimidazole carboxylase,<br>phosphoribosylaminoimidazole succinocarboxamide<br>synthetase isoform 1 | IPI00815732                                                                                                     | 47,941.00  | 294 | 305 | ACGNFGIPCELR               | K | V | 1,393.64 |
| 4428 | LIMS1 LIM and senescent cell antigen-like-<br>containing domain protein 1                                                  | IPI00788612,IPI00917064,IPI00917579                                                                             | 41,552.90  | 295 | 306 | VIEGDVVSALNK               | R | A | 1,243.69 |
| 4429 | DDX3X ATP-dependent RNA helicase DDX3X                                                                                     | IPI00215637                                                                                                     | 73,227.70  | 295 | 311 | VRPCVVYGGADIGQQIR          | R | D | 1,887.99 |
| 4430 | NARG1 Isoform 1 of NMDA receptor-regulated<br>protein 1                                                                    | IPI00386189                                                                                                     | 101,259.90 | 295 | 305 | RLPLNFLSGEK                | R | F | 1,273.73 |
| 4431 | GMPPA Isoform 1 of Mannose-1-phosphate<br>quanyltransferase alpha                                                          | IPI00101782,IPI00657888                                                                                         | 46,273.80  | 295 | 309 | VAPSAVLGPNVNSIGK           | K | G | 1,408.82 |
| 4432 | PPCS Phosphopantothenate--cysteine ligase                                                                                  | IPI00023987                                                                                                     | 33,988.00  | 295 | 302 | IVDNLQSR                   | K | H | 944.516  |
| 4433 | VIM Vimentin                                                                                                               | IPI00418471                                                                                                     | 53,634.60  | 295 | 304 | FADLSEAANR                 | K | N | 1,093.53 |
| 4434 | IGHA1;IGHV3OR16-13 SNC66 protein                                                                                           | IPI00383164,IPI00386879,IPI00423460,IPI00426060,IPI00430842,IPI<br>00449920,IPI00644497,IPI00719233,IPI00744561 | 53,069.40  | 295 | 309 | DASGVFTFTWTPSSGK           | R | S | 1,540.73 |
| 4435 | NCL Nucleolin                                                                                                              | IPI00604620                                                                                                     | 76,597.90  | 295 | 318 | KQKVEGTEPTTAFNLFVGNLN<br>K | S | S | 2,696.40 |
| 4436 | VEZF1 zinc finger protein 161                                                                                              | IPI00028912,IPI00878017                                                                                         | 56,912.00  | 295 | 306 | LLSAAAYITSHLK<br>FNK       | K | T | 1,316.76 |
| 4437 | DNAJB1 DnaJ homolog subfamily B member 1                                                                                   | IPI00015947                                                                                                     | 38,027.60  | 295 | 306 | RKVPGEGLPLPK               | R | T | 1,290.79 |
| 4438 | IPO7 Importin-7                                                                                                            | IPI00007402                                                                                                     | 119,501.50 | 295 | 306 | AFAVGVQQVLLK               | K | V | 1,272.77 |
| 4439 | PKM2 Isoform M1 of Pyruvate kinase isozymes<br>M1/M2                                                                       | IPI00220644,IPI00479186                                                                                         | 58,044.60  | 295 | 305 | GDLGIEIPA EK               | R | V | 1,141.61 |
| 4440 | CTPS CTP synthase 1                                                                                                        | IPI00290142                                                                                                     | 66,672.70  | 295 | 306 | LLETCSIALVGK               | R | Y | 1,303.73 |
| 4441 | ASCC1 Isoform 2 of Activating signal cointegrator 1<br>complex subunit 1                                                   | IPI00434390                                                                                                     | 41,210.40  | 295 | 303 | YNLYTAEGK                  | R | Y | 1,058.52 |
| 4442 | FKBP4 FK506-binding protein 4                                                                                              | IPI00219005                                                                                                     | 51,787.90  | 296 | 313 | IVSWLEYESSFSNEEAQK         | K | A | 2,146.00 |
| 4443 | BZW1 Isoform 2 of Basic leucine zipper and W2<br>domain-containing protein 1                                               | IPI00180128,IPI00785096,IPI00916112,IPI00916503,IPI00918019                                                     | 40,522.00  | 296 | 302 | IVVLFYK                    | K | A | 881.5495 |
| 4444 | EIF4A1 Eukaryotic initiation factor 4A-I                                                                                   | IPI00025491,IPI00871852                                                                                         | 46,137.30  | 296 | 311 | DFTVSAMHGDMQKER            | R | D | 1,898.80 |
| 4445 | CCT6A T-complex protein 1 subunit zeta                                                                                     | IPI00027626,IPI00552590                                                                                         | 58,007.30  | 296 | 307 | GIDPFSLDALSK               | K | E | 1,262.66 |
| 4446 | MCM6 DNA replication licensing factor MCM6                                                                                 | IPI00031517                                                                                                     | 92,872.60  | 296 | 309 | LVFLACCVAPTNPR             | R | F | 1,617.82 |
| 4447 | PM20D2 Peptidase M20 domain-containing protein<br>2                                                                        | IPI00217852                                                                                                     | 47,758.70  | 296 | 308 | AAALASGCTVEIK              | R | G | 1,290.67 |
| 4448 | ATG3 Isoform 1 of Autophagy-related protein 3                                                                              | IPI00022254                                                                                                     | 35,846.20  | 296 | 310 | FVQAVIPTIEYDYTR            | K | H | 1,814.93 |

|      |                                                                           |                                     |            |     |     |                                  |   |   |          |
|------|---------------------------------------------------------------------------|-------------------------------------|------------|-----|-----|----------------------------------|---|---|----------|
| 4449 | SLC25A3 Isoform A of Phosphate carrier protein, mitochondrial             | IPI00022202,IPI00215777,IPI00790115 | 40,077.90  | 296 | 305 | GSSASLVLR                        | K | L | 1,017.61 |
| 4450 | UNG Isoform 2 of Uracil-DNA glycosylase                                   | IPI00011069                         | 34,627.40  | 296 | 302 | TNELLQK                          | K | S | 845.4728 |
| 4451 | DNAJB1 DnaJ homolog subfamily B member 1                                  | IPI00015947                         | 38,027.60  | 296 | 306 | KVPGEGLPLPK                      | R | T | 1,134.69 |
| 4452 | SNX6 sorting nexin 6 isoform b                                            | IPI00298111                         | 47,787.80  | 296 | 309 | VSADEDLKLSDLLK                   | R | Y | 1,545.84 |
| 4453 | ILK Integrin-linked protein kinase                                        | IPI00013219                         | 51,401.70  | 297 | 303 | FALDMAR                          | K | G | 823.4131 |
| 4454 | PDLIM1 PDZ and LIM domain protein 1                                       | IPI00010414                         | 36,053.30  | 297 | 309 | GHFFVEDQIYCEK                    | K | H | 1,671.75 |
| 4455 | TARS Threonyl-tRNA synthetase, cytoplasmic                                | IPI00329633,IPI00908949             | 83,419.80  | 297 | 306 | IYGISFPDPK                       | R | M | 1,136.60 |
| 4456 | FLOT1 Flotillin-1                                                         | IPI00027438                         | 47,336.80  | 297 | 317 | LAEAEKSQLIMQAEAEAASVR            | R | M | 2,261.14 |
| 4457 | CORO1C Coronin-1C_i3 protein                                              | IPI00867509                         | 58,930.80  | 297 | 304 | QLALWNP                          | R | N | 969.5517 |
| 4458 | RBBP4 Histone-binding protein RBBP4                                       | IPI00328319,IPI00645329             | 47,637.80  | 297 | 304 | TVALWDLR                         | K | N | 973.5466 |
| 4459 | PSMD3 26S proteasome non-ATPase regulatory subunit 3                      | IPI00011603                         | 60,961.60  | 297 | 306 | AIQLEYSEAR                       | K | R | 1,179.60 |
| 4460 | PDE12 Isoform 1 of 2',5'-phosphodiesterase 12                             | IPI00174390,IPI00886797             | 67,333.70  | 297 | 314 | TVSYNILADTYAQTEFSR               | R | T | 2,079.00 |
| 4461 | SLC30A7 Zinc transporter 7                                                | IPI00302605,IPI00646270,IPI00843795 | 41,608.80  | 297 | 311 | TPLLENSLPQCYQR                   | R | V | 1,815.91 |
| 4462 | LCP1 Plastin-2                                                            | IPI00010471                         | 70,274.10  | 298 | 326 | AYYHLLQVAPKGDDEGVPAV<br>VIDMSGLR | K | E | 3,172.60 |
| 4463 | NOP5/NOP58 Nucleolar protein 5                                            | IPI00006379                         | 59,562.20  | 298 | 310 | LIAHAGSLLNLAK                    | R | H | 1,320.80 |
| 4464 | NOP5/NOP58 Nucleolar protein 5                                            | IPI00006379                         | 59,562.20  | 298 | 310 | LIAHAGSLLNLAK                    | R | H | 1,320.80 |
| 4465 | TUBB2C Tubulin beta-2C chain                                              | IPI00007752                         | 49,812.70  | 298 | 306 | NMMAACDPR                        | K | H | 1,081.42 |
| 4466 | TUBB2C Tubulin beta-2C chain                                              | IPI00007752                         | 49,812.70  | 298 | 306 | NMMAACDPR                        | K | H | 1,065.43 |
| 4467 | TUBB Tubulin beta chain                                                   | IPI00011654                         | 49,652.60  | 298 | 306 | NMMAACDPR                        | K | H | 1,081.42 |
| 4468 | TUBB Tubulin beta chain                                                   | IPI00011654                         | 49,652.60  | 298 | 306 | NMMAACDPR                        | K | H | 1,065.43 |
| 4469 | TUBB2A Tubulin beta-2A chain                                              | IPI00013475,IPI00031370             | 49,889.10  | 298 | 306 | NMMAACDPR                        | K | H | 1,081.42 |
| 4470 | TUBB2A Tubulin beta-2A chain                                              | IPI00013475,IPI00031370             | 49,889.10  | 298 | 306 | NMMAACDPR                        | K | H | 1,065.43 |
| 4471 | DRG2 Developmentally-regulated GTP-binding protein 2                      | IPI00022697,IPI00794194             | 40,729.80  | 298 | 310 | GQRPDFDAILLR                     | R | K | 1,501.81 |
| 4472 | CLTC Isoform 1 of Clathrin heavy chain 1                                  | IPI00024067,IPI00455383             | 191,600.90 | 298 | 320 | ISGETIFVTAPHEATAGIIVNR           | R | K | 2,353.25 |
| 4473 | TXLNA Alpha-taxilin                                                       | IPI00470779                         | 61,873.20  | 298 | 308 | LRQENMELAER                      | K | L | 1,404.69 |
| 4474 | ILF3 Isoform 1 of Interleukin enhancer-binding factor 3                   | IPI00298788                         | 95,320.90  | 298 | 308 | EATDAIGHLDR                      | K | Q | 1,197.59 |
| 4475 | PCBP1 Poly(rC)-binding protein 1                                          | IPI00016610                         | 37,480.20  | 298 | 306 | QGANINEIR                        | R | Q | 1,014.53 |
| 4476 | GDI2 cDNA FLJ60299, highly similar to Rab GDP dissociation inhibitor beta | IPI00031461                         | 51,138.50  | 298 | 303 | VGQVIR                           | K | V | 671.4199 |
| 4477 | FASN Fatty acid synthase                                                  | IPI00026781                         | 273,382.00 | 299 | 310 | VGDPQELNGITR                     | K | A | 1,298.67 |
| 4478 | EIF3I Eukaryotic translation initiation factor 3 subunit I                | IPI00012795                         | 36,484.00  | 299 | 310 | SYSSGGEDGYVR                     | K | I | 1,276.54 |
| 4479 | SFPQ Isoform Long of Splicing factor, proline- and glutamine-rich         | IPI00010740                         | 76,131.50  | 299 | 315 | LFVGNLPADITEDEFKR                | R | L | 1,964.01 |
| 4480 | TCP1 T-complex protein 1 subunit alpha                                    | IPI00290566                         | 60,327.20  | 299 | 309 | YFVEAGAMAVR                      | K | R | 1,213.60 |
| 4481 | MARS Methionyl-tRNA synthetase, cytoplasmic                               | IPI00008240                         | 101,099.50 | 300 | 321 | LRQWNTLYLCGTDEYGTATE<br>TK       | R | A | 2,620.24 |
| 4482 | HSPA8 Isoform 1 of Heat shock cognate 71 kDa protein                      | IPI00003865                         | 70,881.80  | 300 | 311 | ARFEELNADLFR                     | R | G | 1,480.75 |
| 4483 | PLS1 Plastin-1                                                            | IPI00032304,IPI00789401             | 70,338.30  | 300 | 311 | AYFHLLNQIAPK                     | R | G | 1,414.78 |
| 4484 | HNRNPA2B1 43 kDa protein                                                  | IPI00874030                         | 43,234.30  | 300 | 327 | GFGDGYNGYGGGPGGGNFG<br>GSPGYGGGR | R | G | 2,495.04 |
| 4485 | PABPC1 Isoform 1 of Polyadenylate-binding protein 1                       | IPI00008524                         | 70,653.30  | 300 | 311 | NLDDGIDDERLR                     | K | K | 1,430.69 |
| 4486 | EEF2 Elongation factor 2                                                  | IPI00186290                         | 95,322.10  | 300 | 308 | VFDAIMNFK                        | K | K | 1,084.55 |
| 4487 | LDHB L-lactate dehydrogenase B chain                                      | IPI00219217                         | 36,620.60  | 300 | 308 | GLTSVINQK                        | R | L | 959.5521 |
| 4488 | PABPC1 Isoform 1 of Polyadenylate-binding protein 1                       | IPI00008524                         | 70,653.30  | 300 | 309 | NLDDGIDDER                       | K | L | 1,161.50 |
| 4489 | SNRNP40 cDNA FLJ56825, highly similar to WD repeat protein 57             | IPI00006723                         | 44,498.40  | 300 | 317 | IAAGSADRFBVYVWDTTSR              | K | R | 2,015.00 |
| 4490 | HSPA1A;HSPA1B Heat shock 70 kDa protein 1                                 | IPI00304925                         | 70,036.00  | 300 | 311 | ARFEELCSDLFR                     | R | S | 1,542.74 |

|      |                                                                                           |                                                             |            |     |     |                       |   |   |          |
|------|-------------------------------------------------------------------------------------------|-------------------------------------------------------------|------------|-----|-----|-----------------------|---|---|----------|
| 4491 | HNRNPF Heterogeneous nuclear ribonucleoprotein F                                          | IPI00003881                                                 | 45,653.80  | 300 | 316 | ATENDIYNFFSPLNPVR     | K | V | 1,996.98 |
| 4492 | HNRNPH1 Heterogeneous nuclear ribonucleoprotein H                                         | IPI00013881,IPI00479191                                     | 49,211.80  | 300 | 316 | ATENDIYNFFSPLNPVR     | R | V | 1,996.98 |
| 4493 | HNRNPH1 Heterogeneous nuclear ribonucleoprotein H                                         | IPI00013881,IPI00479191                                     | 49,211.80  | 300 | 316 | ATENDIYNFFSPLNPVR     | R | V | 1,996.98 |
| 4494 | SGTA Small glutamine-rich tetratricopeptide repeat-containing protein alpha               | IPI00013949                                                 | 34,045.90  | 301 | 313 | SRTPSASNDDQQE         | R | - | 1,434.61 |
| 4495 | SGTA Small glutamine-rich tetratricopeptide repeat-containing protein alpha               | IPI00013949                                                 | 34,045.90  | 301 | 313 | SRTPSASNDDQQE         | R | - | 1,434.61 |
| 4496 | KPNA2;LOC728860 Importin subunit alpha-2                                                  | IPI00002214,IPI00789457                                     | 57,844.50  | 301 | 315 | LLGASELPIVTPALR       | K | A | 1,549.93 |
| 4497 | PLS3 plastin 3                                                                            | IPI00216694                                                 | 70,795.90  | 301 | 312 | AYFHLLNQIAPK          | K | G | 1,414.78 |
| 4498 | P4HB Protein disulfide-isomerase                                                          | IPI00010796                                                 | 57,100.10  | 301 | 308 | ILEFFGLK              | R | K | 966.566  |
| 4499 | GNL3L Guanine nucleotide-binding protein-like 3-like protein                              | IPI00005132,IPI00871959                                     | 65,555.30  | 301 | 320 | LLDAPGIVPGPNSSEVGTILR | R | N | 2,018.13 |
| 4500 | AOF2 Isoform 2 of Lysine-specific histone demethylase 1                                   | IPI00217540,IPI00456631                                     | 95,137.70  | 301 | 315 | VIIIGSGVSGLAAAR       | K | Q | 1,383.83 |
| 4501 | MCCC1 Methylcrotonoyl-CoA carboxylase subunit alpha, mitochondrial                        | IPI00024580,IPI00792499                                     | 80,455.60  | 302 | 308 | LGEEAAVR              | K | A | 715.4097 |
| 4502 | SERPINB1 Leukocyte elastase inhibitor                                                     | IPI00027444                                                 | 42,725.80  | 302 | 311 | ADLSGMSGAR            | K | D | 980.4467 |
| 4503 | HSPA8 Isoform 1 of Heat shock cognate 71 kDa protein                                      | IPI00003865                                                 | 70,881.80  | 302 | 311 | FEELNADLFR            | R | G | 1,253.62 |
| 4504 | PFKP 6-phosphofructokinase type C                                                         | IPI00009790                                                 | 85,579.40  | 302 | 310 | VTILGHVQR             | R | G | 1,022.61 |
| 4505 | CAMK2D Isoform Delta 6 of Calcium/calmodulin-dependent protein kinase type II delta chain | IPI00172636,IPI00430291,IPI00827573,IPI00827625,IPI00876923 | 54,111.10  | 302 | 312 | GAILTTMLATR           | K | N | 1,147.65 |
| 4506 | HSPA1A;HSPA1B Heat shock 70 kDa protein 1                                                 | IPI00304925                                                 | 70,036.00  | 302 | 311 | FEELCSDLFR            | R | S | 1,315.60 |
| 4507 | PPCS Phosphopantothenate--cysteine ligase                                                 | IPI00023987                                                 | 33,988.00  | 303 | 311 | HTAFIGDRN             | R | - | 1,030.51 |
| 4508 | SNX17 Sorting nexin-17                                                                    | IPI00014219                                                 | 52,883.60  | 303 | 309 | LPGQQLR               | R | E | 811.4786 |
| 4509 | PRPF6 Pre-mRNA-processing factor 6                                                        | IPI00305068                                                 | 106,909.70 | 303 | 317 | ETNPHPPAWIASAR        | R | L | 1,683.84 |
| 4510 | BZW1 Isoform 2 of Basic leucine zipper and W2 domain-containing protein 1                 | IPI00180128,IPI00785096,IPI00916112,IPI00916503,IPI00918019 | 40,522.00  | 303 | 313 | AEVLSEEPILK           | K | W | 1,227.68 |
| 4511 | PSMD13 proteasome 26S non-ATPase subunit 13 isoform 2                                     | IPI00375380,IPI00549672                                     | 42,924.90  | 304 | 315 | ITVNEVELLMK           | K | A | 1,403.78 |
| 4512 | UGP2 Isoform 1 of UTP--glucose-1-phosphate uridylyltransferase                            | IPI00329331,IPI00395676,IPI00873223                         | 56,924.00  | 304 | 312 | LVEIAQVPK             | R | A | 996.6089 |
| 4513 | ILK Integrin-linked protein kinase                                                        | IPI00013219                                                 | 51,401.70  | 304 | 317 | GMAFLHTLEPLIPR        | R | H | 1,610.87 |
| 4514 | LAP3 Isoform 1 of Cytosol aminopeptidase                                                  | IPI00419237,IPI00789806                                     | 56,149.70  | 304 | 321 | ADMGGAATCSAIVSAK      | R | L | 1,709.82 |
| 4515 | GDI2 cDNA FLJ60299, highly similar to Rab GDP dissociation inhibitor beta                 | IPI00031461                                                 | 51,138.50  | 304 | 313 | VICILSHPIK            | R | N | 1,179.69 |
| 4516 | NCAPH Condensin complex subunit 2                                                         | IPI00299507                                                 | 82,547.10  | 304 | 313 | APLQQCAEDR            | K | Q | 1,187.55 |
| 4517 | TMPO Isoform Beta of Lamina-associated polypeptide 2, isoforms beta/gamma                 | IPI00030131                                                 | 50,653.40  | 304 | 319 | HASPILPITEFSDIPR      | K | R | 1,792.96 |
| 4518 | HSPA4L Heat shock 70 kDa protein 4L                                                       | IPI00295485,IPI00828021                                     | 94,470.40  | 304 | 316 | AQFEQLCASLLAR         | R | V | 1,506.77 |
| 4519 | ALDOA Fructose-bisphosphate aldolase A                                                    | IPI00465439                                                 | 39,402.60  | 305 | 312 | ALQASALK              | R | A | 801.4829 |
| 4520 | NONO Non-POU domain-containing octamer-binding protein                                    | IPI00304596                                                 | 54,213.60  | 305 | 313 | HEHQVMLMR             | R | Q | 1,196.57 |
| 4521 | DDX17 DEAD box polypeptide 17 isoform 1                                                   | IPI00023785,IPI00651653                                     | 80,256.00  | 305 | 313 | LIDFLESGK             | R | T | 1,021.56 |
| 4522 | DDX17 DEAD box polypeptide 17 isoform 1                                                   | IPI00023785,IPI00651653                                     | 80,256.00  | 305 | 313 | LIDFLESGK             | R | T | 1,021.56 |
| 4523 | DDX17 DEAD box polypeptide 17 isoform 1                                                   | IPI00023785,IPI00651653                                     | 80,256.00  | 305 | 313 | LIDFLESGK             | R | T | 1,021.56 |
| 4524 | ABCF2 ATP-binding cassette sub-family F member 2                                          | IPI00005045,IPI00068506                                     | 71,274.50  | 305 | 315 | YYTGNVDQYVK           | K | T | 1,413.63 |
| 4525 | GNB2 Guanine nucleotide-binding protein G(I)/G(S)/G(T) subunit beta-2                     | IPI00003348                                                 | 37,313.80  | 305 | 314 | AGVLAGHDNR            | R | V | 1,009.52 |
| 4526 | GNB1 Guanine nucleotide-binding protein G(I)/G(S)/G(T) subunit beta-1                     | IPI00026268                                                 | 37,359.50  | 305 | 314 | AGVLAGHDNR            | R | V | 1,009.52 |
| 4527 | CSDE1 Isoform Long of Cold shock domain-containing protein E1                             | IPI00470891,IPI00844264,IPI00873244                         | 88,867.00  | 306 | 317 | SKVTLLEGDHVR          | K | F | 1,353.75 |
| 4528 | HNRNPK Isoform 1 of Heterogeneous nuclear ribonucleoprotein K                             | IPI00216049,IPI00216746,IPI00807545,IPI00910458             | 50,960.50  | 306 | 316 | NLPLPPPPPPR           | R | G | 1,194.70 |
| 4529 | PPP4R2 55 kDa protein                                                                     | IPI00022904,IPI00103654                                     | 54,507.00  | 306 | 323 | NKHPDEDAVEAEGHEVKR    | K | L | 2,059.98 |



|      |                                                                                                 |                                                             |           |     |     |                       |   |   |          |
|------|-------------------------------------------------------------------------------------------------|-------------------------------------------------------------|-----------|-----|-----|-----------------------|---|---|----------|
| 4530 | PRKAR1A cAMP-dependent protein kinase type I-alpha regulatory subunit                           | IP100021831                                                 | 42,964.40 | 306 | 317 | RSENEEFVEVGR          | R | L | 1,450.69 |
| 4531 | LDHA Isoform 1 of L-lactate dehydrogenase A chain                                               | IP100217966                                                 | 36,671.20 | 306 | 315 | VTLTSEEEAR            | K | L | 1,134.56 |
| 4532 | LDHA Isoform 1 of L-lactate dehydrogenase A chain                                               | IP100217966                                                 | 36,671.20 | 306 | 315 | VTLTSEEEAR            | K | L | 1,134.56 |
| 4533 | NSUN2 tRNA (cytosine-5-)-methyltransferase                                                      | IP100306369                                                 | 86,454.80 | 306 | 315 | GAEQLAEGGR            | R | M | 987.4855 |
| 4534 | HSPA4 Heat shock 70 kDa protein 4                                                               | IP100002966                                                 | 94,313.90 | 306 | 316 | FLEMCNDLLAR           | K | V | 1,397.66 |
| 4535 | STIP1 Stress-induced-phosphoprotein 1                                                           | IP100013894,IP100871856                                     | 62,624.10 | 306 | 315 | IGNSYFKEEK            | R | Y | 1,214.61 |
| 4536 | DDX20 Probable ATP-dependent RNA helicase DDX20                                                 | IP100005904                                                 | 92,224.10 | 307 | 321 | IPFNQALVFSNLHSR       | R | A | 1,742.93 |
| 4537 | HSP90AB1 Heat shock protein HSP 90-beta                                                         | IP100414676                                                 | 83,249.30 | 307 | 319 | SLTNDWEDHLAVK         | K | H | 1,527.74 |
| 4538 | ENO1 Isoform alpha-enolase of Alpha-enolase                                                     | IP100465248                                                 | 47,152.20 | 307 | 327 | FTASAGIQVVGDDLTVTNPKR | K | I | 2,189.16 |
| 4539 | HSDL2 Isoform 2 of Hydroxysteroid dehydrogenase-like protein 2                                  | IP100031107,IP100414384                                     | 45,378.60 | 307 | 315 | SGAVEETFR             | R | I | 995.4792 |
| 4540 | PRKAR1A cAMP-dependent protein kinase type I-alpha regulatory subunit                           | IP100021831                                                 | 42,964.40 | 307 | 317 | SENEEFVEVGR           | R | L | 1,294.59 |
| 4541 | PCBP2 poly(rC) binding protein 2 isoform b                                                      | IP100012066,IP100790627                                     | 38,204.50 | 307 | 311 | INEIR                 | K | Q | 644.3726 |
| 4542 | ENO2 Gamma-enolase                                                                              | IP100216171                                                 | 47,251.70 | 307 | 326 | FTANVGIIQVGGDDLTVTNPK | K | R | 2,102.11 |
| 4543 | ENO1 Isoform alpha-enolase of Alpha-enolase                                                     | IP100465248                                                 | 47,152.20 | 307 | 326 | FTASAGIQVVGDDLTVTNPK  | K | R | 2,033.06 |
| 4544 | ENO1 Isoform alpha-enolase of Alpha-enolase                                                     | IP100465248                                                 | 47,152.20 | 307 | 326 | FTASAGIQVVGDDLTVTNPK  | K | R | 2,033.06 |
| 4545 | STK3 cDNA FLJ16404 fis, clone UTERU2008019, highly similar to Serine/threonine-protein kinase 3 | IP100411984                                                 | 59,445.20 | 308 | 316 | NAKPVSILR             | K | D | 997.6153 |
| 4546 | G3BP1 Ras GTPase-activating protein-binding protein 1                                           | IP100012442                                                 | 52,144.80 | 308 | 314 | INIPPQR               | R | G | 837.4942 |
| 4547 | CKB Creatine kinase B-type                                                                      | IP100022977                                                 | 42,627.10 | 308 | 314 | FSEVLKR               | K | L | 878.5094 |
| 4548 | HSP90AA1 heat shock protein 90kDa alpha (cytosolic), class A member 1 isoform 1                 | IP100382470,IP100784295                                     | 98,147.10 | 308 | 323 | VILHLKEDQTEYLEER      | K | R | 2,015.04 |
| 4549 | IGF2BP2 insulin-like growth factor 2 mRNA binding protein 2 isoform a                           | IP100179713,IP100180983,IP100743914                         | 66,104.40 | 308 | 323 | ITISSLQDLSIYNPER      | K | T | 1,848.97 |
| 4550 | SEC13 Protein SEC13 homolog                                                                     | IP100375370,IP100479141,IP100789169,IP100789755,IP100853598 | 35,838.00 | 309 | 325 | GQGSVSASVTEGQQNEQ     | K | - | 1,705.76 |
| 4551 | ATP6V1A V-type proton ATPase catalytic subunit A                                                | IP100007682                                                 | 68,287.40 | 309 | 323 | TALVANTSNPVVAAR       | R | E | 1,515.79 |
| 4552 | TUBA1A Tubulin alpha-1A chain                                                                   | IP100180675                                                 | 50,117.70 | 309 | 320 | HGKYMACECLLYR         | R | G | 1,587.72 |
| 4553 | TUBA1C Tubulin alpha-1C chain                                                                   | IP100218343                                                 | 49,877.40 | 309 | 320 | HGKYMACECLLYR         | R | G | 1,587.72 |
| 4554 | TUBA1B Tubulin alpha-1B chain                                                                   | IP100387144,IP100792677                                     | 50,133.70 | 309 | 320 | HGKYMACECLLYR         | R | G | 1,587.72 |
| 4555 | SERPINH1 Serpin H1                                                                              | IP100032140                                                 | 46,424.00 | 309 | 319 | GVVEVTHDLQK           | K | H | 1,224.66 |
| 4556 | CDC123 Cell division cycle protein 123 homolog                                                  | IP100005670                                                 | 39,118.10 | 309 | 321 | DFVDLSTGEDAHK         | K | L | 1,433.65 |
| 4557 | ILF3 Isoform 1 of Interleukin enhancer-binding factor 3                                         | IP100298788                                                 | 95,320.90 | 309 | 323 | QQREDITQSAQHALR       | R | L | 1,780.91 |
| 4558 | HOXD13 homeobox D13                                                                             | IP100793525,IP100871270                                     | 36,083.20 | 309 | 318 | ISAATNLSEER           | R | Q | 1,061.56 |
| 4559 | LDHB L-lactate dehydrogenase B chain                                                            | IP100219217                                                 | 36,620.60 | 309 | 319 | LKDDEVAQLKK           | K | S | 1,286.73 |
| 4560 | - cDNA FLJ52712, highly similar to Tubulin beta-6 chain                                         | IP100908469                                                 | 46,683.90 | 309 | 322 | NSSYFVEWIPNNVK        | K | V | 1,696.83 |
| 4561 | CTPS CTP synthase 1                                                                             | IP100290142                                                 | 66,672.70 | 310 | 319 | FDSYASVIK             | K | A | 1,116.56 |
| 4562 | RBMX Heterogeneous nuclear ribonucleoprotein G                                                  | IP100304692                                                 | 42,315.70 | 310 | 317 | YDDYSSSR              | R | D | 992.3955 |
| 4563 | TOMM40 Isoform 1 of Mitochondrial import receptor subunit TOM40 homolog                         | IP100014053                                                 | 37,875.10 | 310 | 315 | ANLLFK                | K | G | 705.4294 |
| 4564 | SERBP1 Isoform 1 of Plasminogen activator inhibitor 1 RNA-binding protein                       | IP100410693,IP100412714,IP100470497,IP100470498             | 44,947.80 | 310 | 321 | KPNEGADGQWKK          | R | G | 1,357.69 |
| 4565 | TUBB2A Tubulin beta-2A chain                                                                    | IP100013475,IP100031370                                     | 49,889.10 | 310 | 318 | YLTVAEIFR             | R | G | 1,053.61 |
| 4566 | TUBB2C Tubulin beta-2C chain                                                                    | IP100007752                                                 | 49,812.70 | 310 | 318 | YLTVAAVFR             | R | G | 1,039.59 |
| 4567 | TUBB2C Tubulin beta-2C chain                                                                    | IP100007752                                                 | 49,812.70 | 310 | 318 | YLTVAAVFR             | R | G | 1,039.59 |
| 4568 | TUBB2C Tubulin beta-2C chain                                                                    | IP100007752                                                 | 49,812.70 | 310 | 318 | YLTVAAVFR             | R | G | 1,039.59 |
| 4569 | TUBB Tubulin beta chain                                                                         | IP100011654                                                 | 49,652.60 | 310 | 318 | YLTVAAVFR             | R | G | 1,039.59 |
| 4570 | TUBB Tubulin beta chain                                                                         | IP100011654                                                 | 49,652.60 | 310 | 318 | YLTVAAVFR             | R | G | 1,039.59 |
| 4571 | TUBB Tubulin beta chain                                                                         | IP100011654                                                 | 49,652.60 | 310 | 318 | YLTVAAVFR             | R | G | 1,039.59 |

|      |                                                                              |                                                 |            |     |     |                                   |   |   |          |
|------|------------------------------------------------------------------------------|-------------------------------------------------|------------|-----|-----|-----------------------------------|---|---|----------|
| 4572 | RARS Isoform Complexed of Arginyl-tRNA synthetase, cytoplasmic               | IPI00004860                                     | 75,364.00  | 310 | 321 | LICDVSRQELNK                      | K | I | 1,474.77 |
| 4573 | SERBP1 Isoform 1 of Plasminogen activator inhibitor 1 RNA-binding protein    | IPI00410693,IPI00412714,IPI00470497,IPI00470498 | 44,947.80  | 310 | 320 | KPNEGADGQWK                       | R | K | 1,229.59 |
| 4574 | TOR1AIP1 Putative uncharacterized protein TOR1AIP1                           | IPI00792065                                     | 66,301.60  | 310 | 322 | SELGNQSPSTSSR                     | K | Q | 1,349.63 |
| 4575 | PLD3 Phospholipase D3                                                        | IPI00328243                                     | 54,688.00  | 310 | 319 | ALLNVVDNAR                        | K | S | 1,084.61 |
| 4576 | IGF2BP1 Insulin-like growth factor 2 mRNA-binding protein 1                  | IPI00008557                                     | 63,438.30  | 310 | 325 | ITISSLQDLTLYNPER                  | K | T | 1,862.99 |
| 4577 | TNPO3 Isoform 2 of Transportin-3                                             | IPI00395694,IPI00455125,IPI00455127,IPI00872398 | 104,186.30 | 310 | 322 | IVCTPGQGLGDLR                     | K | T | 1,385.72 |
| 4578 | GAPDH Glyceraldehyde-3-phosphate dehydrogenase                               | IPI00219018                                     | 36,035.30  | 310 | 323 | LISWYDNEFGYSNR                    | K | V | 1,763.80 |
| 4579 | ATP5B ATP synthase subunit beta, mitochondrial                               | IPI00303476                                     | 56,542.50  | 311 | 324 | FTQAGSEVSALLGR                    | R | I | 1,435.75 |
| 4580 | YARS Tyrosyl-tRNA synthetase, cytoplasmic                                    | IPI00007074                                     | 59,127.10  | 311 | 319 | NSVEVALNK                         | K | L | 973.5312 |
| 4581 | TKT cDNA FLJ54957, highly similar to Transketolase                           | IPI00643920                                     | 68,725.40  | 311 | 318 | MPSLPSYK                          | R | V | 938.4653 |
| 4582 | PLS1 Plastin-1                                                               | IPI00032304,IPI00789401                         | 70,338.30  | 312 | 334 | GGEDGPAIAIDLSGINETNDLKR           | K | A | 2,355.18 |
| 4583 | TUBA1A Tubulin alpha-1A chain                                                | IPI00180675                                     | 50,117.70  | 312 | 320 | YMACCLLYR                         | K | G | 1,249.55 |
| 4584 | TUBA1A Tubulin alpha-1A chain                                                | IPI00180675                                     | 50,117.70  | 312 | 320 | YMACCLLYR                         | K | G | 1,249.55 |
| 4585 | TUBA1C Tubulin alpha-1C chain                                                | IPI00218343                                     | 49,877.40  | 312 | 320 | YMACCLLYR                         | K | G | 1,249.55 |
| 4586 | TUBA1B Tubulin alpha-1B chain                                                | IPI00387144,IPI00792677                         | 50,133.70  | 312 | 320 | YMACCLLYR                         | K | G | 1,249.55 |
| 4587 | G3BP2 Isoform A of Ras GTPase-activating protein-binding protein 2           | IPI00009057,IPI00179890                         | 54,102.30  | 312 | 323 | GDMEQNDSNRR                       | R | I | 1,436.58 |
| 4588 | ATIC Bifunctional purine biosynthesis protein PURH                           | IPI00289499                                     | 64,598.50  | 312 | 331 | MSSFGDFVALSDVCDVPTAK              | R | I | 2,161.98 |
| 4589 | FAM54B cDNA FLJ55391                                                         | IPI00071826,IPI00645882                         | 35,260.70  | 312 | 322 | KFALKEEDISR                       | R | K | 1,335.73 |
| 4590 | ILF3 Isoform 1 of Interleukin enhancer-binding factor 3                      | IPI00298788                                     | 95,320.90  | 312 | 323 | EDITQSAQHALR                      | R | L | 1,368.69 |
| 4591 | TRIM28 Isoform 1 of Transcription intermediary factor 1-beta                 | IPI00438229,IPI00438230                         | 88,531.00  | 312 | 327 | VLVNDAAQKVTEGQQR                  | R | L | 1,813.94 |
| 4592 | LARP5 La-related protein 5                                                   | IPI00827634,IPI00847241                         | 80,535.10  | 312 | 321 | AIAINTFLPK                        | K | N | 1,087.65 |
| 4593 | GNL3 Isoform 2 of Guanine nucleotide-binding protein-like 3                  | IPI00003886,IPI00306380                         | 60,527.60  | 312 | 335 | SPASIEVVKPMEAASAILSQADAR          | R | Q | 2,457.27 |
| 4594 | RIC8A resistance to inhibitors of cholinesterase 8 homolog A                 | IPI00100106,IPI00746360,IPI00749304             | 60,354.80  | 312 | 319 | ALLIFLEK                          | R | R | 946.5973 |
| 4595 | RPA1 Replication protein A 70 kDa DNA-binding subunit                        | IPI00020127                                     | 68,121.00  | 312 | 324 | SKDSLVDIIGICK                     | K | S | 1,447.78 |
| 4596 | IMPDH2 Inosine-5'-monophosphate dehydrogenase 2                              | IPI00291510                                     | 55,788.40  | 312 | 322 | NLIDAGVDALR                       | K | V | 1,156.63 |
| 4597 | PDLIM1 PDZ and LIM domain protein 1                                          | IPI00010414                                     | 36,053.30  | 313 | 329 | ERVTPPEGYEVTVFPK                  | R | - | 1,947.02 |
| 4598 | EIF3F HCG1784554, isoform CRA_a                                              | IPI00654777                                     | 39,128.50  | 313 | 321 | VSADNTVGR                         | K | F | 918.4639 |
| 4599 | FAM54B cDNA FLJ55391                                                         | IPI00071826,IPI00645882                         | 35,260.70  | 313 | 322 | FALKEEDISR                        | K | K | 1,207.63 |
| 4600 | CDC5L Cell division cycle 5-like protein                                     | IPI00465294,IPI00909093                         | 92,236.10  | 313 | 321 | VGQASEIAR                         | K | Q | 930.5003 |
| 4601 | EIF2B3 Isoform 1 of Translation initiation factor eIF-2B subunit gamma       | IPI00006504                                     | 50,223.30  | 313 | 324 | VSTLGLYMEANR                      | R | Q | 1,353.68 |
| 4602 | PABPC4 Isoform 1 of Polyadenylate-binding protein 4                          | IPI00012726,IPI00555747,IPI00642904,IPI00642944 | 70,765.80  | 313 | 324 | EFSFPGSITSAK                      | K | V | 1,270.63 |
| 4603 | MAT2B Isoform 1 of Methionine adenosyltransferase 2 subunit beta             | IPI00002324                                     | 37,533.60  | 313 | 327 | IGIKESLWPFLLIDKR                  | R | W | 1,815.05 |
| 4604 | TALDO1 Transaldolase                                                         | IPI00744692                                     | 37,523.70  | 314 | 324 | KFAADAVKLER                       | R | M | 1,247.71 |
| 4605 | RBM4 Isoform 1 of RNA-binding protein 4                                      | IPI00003704                                     | 40,296.20  | 314 | 341 | ATAPVPTVGGEGYGYGHESEL             | R | N | 2,776.32 |
| 4606 | RBM4 Isoform 1 of RNA-binding protein 4                                      | IPI00003704                                     | 40,296.20  | 314 | 341 | SQASAAAR<br>ATAPVPTVGGEGYGYGHESEL | R | N | 2,776.32 |
| 4607 | RPA1 Replication protein A 70 kDa DNA-binding subunit                        | IPI00020127                                     | 68,121.00  | 314 | 324 | SQASAAAR<br>DSLVDIIGICK           | K | S | 1,232.66 |
| 4608 | PDLIM1 PDZ and LIM domain protein 1                                          | IPI00010414                                     | 36,053.30  | 315 | 329 | VTPPEGYEVTVFPK                    | R | - | 1,661.88 |
| 4609 | PCCA propionyl-Coenzyme A carboxylase, alpha polypeptide isoform a precursor | IPI00744115,IPI00796978,IPI00895869             | 80,041.20  | 315 | 325 | AMGEQAVALAR                       | R | A | 1,116.58 |

|      |                                                                           |                                                 |            |     |     |                        |   |   |          |
|------|---------------------------------------------------------------------------|-------------------------------------------------|------------|-----|-----|------------------------|---|---|----------|
| 4610 | KPNA6 cDNA FLJ53229, highly similar to Importin alpha-7 subunit           | IPI00747764                                     | 60,563.50  | 315 | 321 | VASPALR                | K | A | 713.4304 |
| 4611 | DDX47 Probable ATP-dependent RNA helicase DDX47                           | IPI00023972,IPI00397372                         | 50,630.40  | 315 | 325 | SILLATDVASR            | R | G | 1,145.65 |
| 4612 | TALDO1 Transaldolase                                                      | IPI00744692                                     | 37,523.70  | 315 | 324 | FAADAVKLER             | K | M | 1,119.62 |
| 4613 | CCDC86 Coiled-coil domain-containing protein 86                           | IPI00012199                                     | 40,218.10  | 315 | 323 | KADEVVQVIR             | R | N | 1,041.64 |
| 4614 | PCBP1 Poly(rC)-binding protein 1                                          | IPI00016610                                     | 37,480.20  | 315 | 325 | IANPVEGSSGR            | K | Q | 1,086.55 |
| 4615 | NUDC Nuclear migration protein nudC                                       | IPI00550746                                     | 38,225.70  | 316 | 327 | FMDQHPEMDFSK           | K | A | 1,543.62 |
| 4616 | HSDL2 Isoform 2 of Hydroxysteroid dehydrogenase-like protein 2            | IPI00031107,IPI00414384                         | 45,378.60  | 316 | 327 | IVKDSLSDDVVK           | R | A | 1,317.73 |
| 4617 | PSMD13 proteasome 26S non-ATPase subunit 13 isoform 2                     | IPI00375380,IPI00549672                         | 42,924.90  | 316 | 323 | ALSVGLVK               | K | G | 786.5084 |
| 4618 | TOMM40 Isoform 1 of Mitochondrial import receptor subunit TOM40 homolog   | IPI00014053                                     | 37,875.10  | 316 | 330 | GSVDSNWIVGATLEK        | K | K | 1,575.80 |
| 4619 | DDX3X ATP-dependent RNA helicase DDX3X                                    | IPI00215637                                     | 73,227.70  | 316 | 326 | GCHLLVATPGR            | R | L | 1,180.63 |
| 4620 | EIF2S2 Eukaryotic translation initiation factor 2 subunit 2               | IPI00021728                                     | 38,371.70  | 316 | 324 | TGFQAVTGK              | K | R | 908.4837 |
| 4621 | STIP1 Stress-induced-phosphoprotein 1                                     | IPI00013894,IPI00871856                         | 62,624.10  | 316 | 325 | YKDAIHFNK              | K | S | 1,298.65 |
| 4622 | CUL4B Isoform 1 of Cullin-4B                                              | IPI00179057,IPI00480142,IPI00643885             | 102,285.90 | 316 | 323 | AHIISDQK               | R | V | 911.4946 |
| 4623 | THOC6 Isoform 1 of THO complex subunit 6 homolog                          | IPI00328985,IPI00641826                         | 37,517.00  | 316 | 325 | VLTAAGNSCR             | K | V | 1,048.52 |
| 4624 | XRCC5 ATP-dependent DNA helicase 2 subunit 2                              | IPI00220834,IPI00871391                         | 82,689.10  | 316 | 325 | YGSDIVPFSK             | R | V | 1,112.56 |
| 4625 | XRCC5 ATP-dependent DNA helicase 2 subunit 2                              | IPI00220834,IPI00871391                         | 82,689.10  | 316 | 332 | YGSDIVPFSKVDDEEQMK     | R | Y | 1,987.93 |
| 4626 | HNRNPK Isoform 1 of Heterogeneous nuclear ribonucleoprotein K             | IPI00216049,IPI00216746,IPI00807545,IPI00910458 | 50,960.50  | 317 | 326 | GGDLMAYDRR             | R | G | 1,169.54 |
| 4627 | C12orf10 UPF0160 protein MYG1                                             | IPI00029444,IPI00304163,IPI00796436,IPI00797519 | 42,428.00  | 317 | 324 | LPLPEPWR               | R | G | 1,007.57 |
| 4628 | CALD1 Isoform 5 of Caldesmon                                              | IPI00333771                                     | 61,195.30  | 317 | 324 | VLEEEQR                | K | R | 1,031.50 |
| 4629 | CTTN Src substrate cortactin                                              | IPI00029601                                     | 61,567.40  | 317 | 336 | MDKNASTFEDVTQVSSAYQK   | R | T | 2,249.04 |
| 4630 | HNRNPH1 Heterogeneous nuclear ribonucleoprotein H                         | IPI00013881,IPI00479191                         | 49,211.80  | 317 | 326 | VHIEIGPDGR             | R | V | 1,092.58 |
| 4631 | HNRNPH2 Heterogeneous nuclear ribonucleoprotein H2                        | IPI00026230                                     | 49,246.10  | 317 | 326 | VHIEIGPDGR             | R | V | 1,092.58 |
| 4632 | TRAP1 Heat shock protein 75 kDa, mitochondrial                            | IPI00030275,IPI00646055                         | 80,094.90  | 317 | 326 | YVAQAHDKPR             | R | Y | 1,184.62 |
| 4633 | RUVBL1 Isoform 1 of RuvB-like 1                                           | IPI00021187                                     | 50,211.40  | 318 | 333 | ALESSIAPVIFASNR        | R | G | 1,687.94 |
| 4634 | SMU1 WD40 repeat-containing protein SMU1                                  | IPI00305833                                     | 57,526.80  | 318 | 332 | DSSQLSASFDTIR          | K | I | 1,667.82 |
| 4635 | EIF2S3 Eukaryotic translation initiation factor 2 subunit 3               | IPI00297982                                     | 51,092.20  | 318 | 342 | IVSLFAEHNDLQYAAPGGLIGV | K | I | 2,570.36 |
| 4636 | PKD3 [Pyruvate dehydrogenase [lipoamide]] kinase isozyme 3, mitochondrial | IPI00014849,IPI00915357                         | 46,922.70  | 318 | 332 | AAPLAGFGYGLPISR        | R | L | 1,489.82 |
| 4637 | SSB Lupus La protein                                                      | IPI00009032,IPI00916802                         | 46,821.00  | 318 | 330 | IIEDQQESLNKWK          | K | S | 1,630.84 |
| 4638 | ALDOA Fructose-bisphosphate aldolase A                                    | IPI00465439                                     | 39,402.60  | 319 | 331 | ENLKAAQEEYVKR          | K | A | 1,577.83 |
| 4639 | CSTF3 Cleavage stimulation factor 77 kDa subunit                          | IPI00015195                                     | 82,906.20  | 319 | 330 | LFSDEAANIYER           | K | A | 1,427.68 |
| 4640 | LDHA Isoform 1 of L-lactate dehydrogenase A chain                         | IPI00217966                                     | 36,671.20  | 319 | 328 | SADTLWGIQK             | K | E | 1,118.58 |
| 4641 | FKBP4 FK506-binding protein 4                                             | IPI00219005                                     | 51,787.90  | 319 | 331 | LASHLNLAMCHLK          | R | L | 1,507.79 |
| 4642 | TCEAL4 Isoform 2 of Transcription elongation factor A protein-like 4      | IPI00647163,IPI00657999,IPI00829838             | 40,560.50  | 319 | 327 | LGAFLWMQR              | K | N | 1,137.59 |
| 4643 | GARS Glycyl-tRNA synthetase                                               | IPI00783097,IPI00915808                         | 83,123.50  | 319 | 331 | LPFAAAQIGNSFR          | K | N | 1,391.74 |
| 4644 | HSP90AB1 Heat shock protein HSP 90-beta                                   | IPI00414676                                     | 83,249.30  | 320 | 330 | HFSVEGQLEFR            | K | A | 1,348.66 |
| 4645 | SERPINH1 Serpin H1                                                        | IPI00032140                                     | 46,424.00  | 320 | 334 | HLAGLGLTEAIDKNK        | K | A | 1,579.88 |
| 4646 | LDHB L-lactate dehydrogenase B chain                                      | IPI00219217                                     | 36,620.60  | 320 | 329 | SADTLWDIQK             | K | D | 1,176.59 |
| 4647 | LMNA Isoform A of Lamin-A/C                                               | IPI00021405                                     | 74,122.60  | 320 | 329 | LRDLEDLAR              | K | E | 1,187.64 |
| 4648 | USP14 Ubiquitin carboxyl-terminal hydrolase 14                            | IPI00219913,IPI00640357,IPI00871297,IPI00872664 | 56,052.30  | 320 | 330 | LPAYLIQMVR             | R | F | 1,304.74 |
| 4649 | PCBP2 poly(rC) binding protein 2 isoform b                                | IPI00012066,IPI00790627                         | 38,204.50  | 320 | 330 | IANPVEGSTDR            | K | Q | 1,158.58 |
| 4650 | PCBP2 poly(rC) binding protein 2 isoform b                                | IPI00012066,IPI00790627                         | 38,204.50  | 320 | 330 | IANPVEGSTDR            | K | Q | 1,158.58 |
| 4651 | PLS3 plastin 3                                                            | IPI00216694                                     | 70,795.90  | 321 | 336 | IDINMSGFNETDDLKR       | R | A | 1,883.88 |

|      |                                                                 |                                                             |           |     |     |                             |   |   |          |
|------|-----------------------------------------------------------------|-------------------------------------------------------------|-----------|-----|-----|-----------------------------|---|---|----------|
| 4652 | NOP56 Nucleolar protein 5A                                      | IPI00411937                                                 | 66,034.00 | 321 | 333 | YPASTVQILGAEK               | K | A | 1,376.74 |
| 4653 | TUBA1A Tubulin alpha-1A chain                                   | IPI00180675                                                 | 50,117.70 | 321 | 326 | GDVVVPK                     | R | D | 614.3509 |
| 4654 | TUBA1A Tubulin alpha-1A chain                                   | IPI00180675                                                 | 50,117.70 | 321 | 326 | GDVVVPK                     | R | D | 614.3509 |
| 4655 | TUBA1C Tubulin alpha-1C chain                                   | IPI00218343                                                 | 49,877.40 | 321 | 326 | GDVVVPK                     | R | D | 614.3509 |
| 4656 | TUBA1B Tubulin alpha-1B chain                                   | IPI00387144,IPI00792677                                     | 50,133.70 | 321 | 326 | GDVVVPK                     | R | D | 614.3509 |
| 4657 | TUBA1B Tubulin alpha-1B chain                                   | IPI00387144,IPI00792677                                     | 50,133.70 | 321 | 326 | GDVVVPK                     | R | D | 614.3509 |
| 4658 | LMNB1 Lamin-B1                                                  | IPI00217975                                                 | 66,391.60 | 321 | 330 | IQELEDLLAK                  | R | E | 1,171.66 |
| 4659 | KHSRP KH-type splicing regulatory protein                       | IPI00479786,IPI00855957                                     | 73,097.60 | 321 | 331 | IGGGIDVPVPR                 | R | H | 1,079.62 |
| 4660 | CKB Creatine kinase B-type                                      | IPI00022977                                                 | 42,627.10 | 321 | 341 | GTGGVDTAAVGGVFDVSNAD<br>R   | R | L | 1,964.93 |
| 4661 | TUBB2C Tubulin beta-2C chain                                    | IPI00007752                                                 | 49,812.70 | 321 | 336 | MSMKEVDEQMLNVQNK            | R | N | 1,971.88 |
| 4662 | TUBB2C Tubulin beta-2C chain                                    | IPI00007752                                                 | 49,812.70 | 321 | 336 | MSMKEVDEQMLNVQNK            | R | N | 1,923.90 |
| 4663 | TUBB Tubulin beta chain                                         | IPI00011654                                                 | 49,652.60 | 321 | 336 | MSMKEVDEQMLNVQNK            | R | N | 1,971.88 |
| 4664 | TUBB Tubulin beta chain                                         | IPI00011654                                                 | 49,652.60 | 321 | 336 | MSMKEVDEQMLNVQNK            | R | N | 1,923.90 |
| 4665 | TUBB2A Tubulin beta-2A chain                                    | IPI00013475,IPI00031370                                     | 49,889.10 | 321 | 336 | MSMKEVDEQMLNVQNK            | R | N | 1,971.88 |
| 4666 | TUBB2A Tubulin beta-2A chain                                    | IPI00013475,IPI00031370                                     | 49,889.10 | 321 | 336 | MSMKEVDEQMLNVQNK            | R | N | 1,923.90 |
| 4667 | G3BP1 Ras GTPase-activating protein-binding protein 1           | IPI00012442                                                 | 52,144.80 | 321 | 331 | EAGEQGDIEPR                 | R | R | 1,200.55 |
| 4668 | G3BP1 Ras GTPase-activating protein-binding protein 1           | IPI00012442                                                 | 52,144.80 | 321 | 331 | EAGEQGDIEPR                 | R | R | 1,200.55 |
| 4669 | TUBA1A Tubulin alpha-1A chain                                   | IPI00180675                                                 | 50,117.70 | 321 | 336 | GDVVPKDVAIAIATIK            | R | T | 1,610.91 |
| 4670 | TUBA1C Tubulin alpha-1C chain                                   | IPI00218343                                                 | 49,877.40 | 321 | 336 | GDVVPKDVAIAIATIK            | R | T | 1,610.91 |
| 4671 | TUBA1B Tubulin alpha-1B chain                                   | IPI00387144,IPI00792677                                     | 50,133.70 | 321 | 336 | GDVVPKDVAIAIATIK            | R | T | 1,610.91 |
| 4672 | CCT7 T-complex protein 1 subunit eta                            | IPI00018465                                                 | 59,349.80 | 322 | 344 | TMMACGGSIQTSVNALSADV<br>LGR | R | C | 2,355.11 |
| 4673 | SRP54 Signal recognition particle 54 kDa protein                | IPI00009822                                                 | 55,688.30 | 322 | 330 | LKHGQFTLR                   | K | D | 1,099.64 |
| 4674 | RNH1 Ribonuclease inhibitor                                     | IPI00550069                                                 | 49,956.40 | 322 | 341 | SCSFTAACCSHFSSVLAQNR        | K | F | 2,289.98 |
| 4675 | RARS Isoform Complexed of Arginyl-tRNA synthetase, cytoplasmic  | IPI00004860                                                 | 75,364.00 | 322 | 333 | IYDALDVSLIER                | K | G | 1,406.75 |
| 4676 | CDC123 Cell division cycle protein 123 homolog                  | IPI00005670                                                 | 39,118.10 | 322 | 327 | LIDFLK                      | K | L | 748.4605 |
| 4677 | ALDOA Fructose-bisphosphate aldolase A                          | IPI00465439                                                 | 39,402.60 | 323 | 331 | AAQEEYVKR                   | K | A | 1,093.56 |
| 4678 | HSPA1A;HSPA1B Heat shock 70 kDa protein 1                       | IPI00304925                                                 | 70,036.00 | 323 | 342 | DAKLDKAKIHDLVLVGGSTR        | R | I | 2,136.18 |
| 4679 | WDR26 Isoform 1 of WD repeat-containing protein 26              | IPI00414197,IPI00645819                                     | 72,106.50 | 323 | 340 | LDNNLDSVSLLDHVCSR           | K | R | 2,070.03 |
| 4680 | GAPDH Glyceraldehyde-3-phosphate dehydrogenase                  | IPI00219018                                                 | 36,035.30 | 324 | 334 | VVDLMAHMASK                 | R | - | 1,233.60 |
| 4681 | GAPDH Glyceraldehyde-3-phosphate dehydrogenase                  | IPI00219018                                                 | 36,035.30 | 324 | 335 | VVDLMAHMASKE                | R | - | 1,330.65 |
| 4682 | PGK1 Phosphoglycerate kinase 1                                  | IPI00169383                                                 | 44,597.30 | 324 | 330 | YAEAVTR                     | K | A | 809.4151 |
| 4683 | AP2M1 Isoform 1 of AP-2 complex subunit mu-1                    | IPI00022256,IPI00619900,IPI00798379                         | 49,637.70 | 324 | 339 | IPTPLNTSGVQVICMK            | R | G | 1,773.92 |
| 4684 | TLE3 Isoform 2 of Transducin-like enhancer protein 3            | IPI00177938,IPI00182478,IPI00219368,IPI00221206,IPI00867718 | 82,204.70 | 324 | 338 | NDAPTPTGTSTTPGLR            | R | S | 1,484.73 |
| 4685 | ILF3 Isoform 1 of Interleukin enhancer-binding factor 3         | IPI00298788                                                 | 95,320.90 | 324 | 332 | LAAFGQLHK                   | R | V | 984.5626 |
| 4686 | CPSF2 Cleavage and polyadenylation specificity factor subunit 2 | IPI00419531,IPI00902580                                     | 88,471.50 | 325 | 339 | VVLASQPDLCEGFSR             | K | D | 1,677.83 |
| 4687 | HNRNPU heterogeneous nuclear ribonucleoprotein U isoform a      | IPI00644079                                                 | 90,567.20 | 325 | 331 | ASYGVSK                     | R | G | 711.3671 |
| 4688 | EIF4A1 Eukaryotic initiation factor 4A-I                        | IPI00025491,IPI00871852                                     | 46,137.30 | 325 | 334 | VLITTDLLAR                  | R | G | 1,114.68 |
| 4689 | RPA1 Replication protein A 70 kDa DNA-binding subunit           | IPI00020127                                                 | 68,121.00 | 325 | 331 | SYEDATK                     | K | I | 813.3625 |
| 4690 | NCL Nucleolin                                                   | IPI00604620                                                 | 76,597.90 | 325 | 342 | TGISDVFAKNDLAVVDVR          | K | I | 1,919.02 |
| 4691 | NONO Non-POU domain-containing octamer-binding protein          | IPI00304596                                                 | 54,213.60 | 325 | 337 | RMEELHNQEVQKR               | R | K | 1,696.85 |
| 4692 | LPCAT1 1-acylglycerophosphocholine O-acyltransferase 1          | IPI00171626                                                 | 59,134.80 | 325 | 336 | LPADTCLLEFAR                | R | L | 1,405.71 |
| 4693 | TUBB2C Tubulin beta-2C chain                                    | IPI00007752                                                 | 49,812.70 | 325 | 336 | EVDEQMLNVQNK                | K | N | 1,462.68 |

|      |                                                                                           |                                                             |           |     |     |                        |   |   |          |
|------|-------------------------------------------------------------------------------------------|-------------------------------------------------------------|-----------|-----|-----|------------------------|---|---|----------|
| 4694 | TUBB2C Tubulin beta-2C chain                                                              | IPI00007752                                                 | 49,812.70 | 325 | 336 | EVDEQMLNVQNK           | K | N | 1,462.68 |
| 4695 | TUBB Tubulin beta chain                                                                   | IPI00011654                                                 | 49,652.60 | 325 | 336 | EVDEQMLNVQNK           | K | N | 1,462.68 |
| 4696 | TUBB Tubulin beta chain                                                                   | IPI00011654                                                 | 49,652.60 | 325 | 336 | EVDEQMLNVQNK           | K | N | 1,462.68 |
| 4697 | TUBB2A Tubulin beta-2A chain                                                              | IPI00013475,IPI00031370                                     | 49,889.10 | 325 | 336 | EVDEQMLNVQNK           | K | N | 1,462.68 |
| 4698 | TUBB2A Tubulin beta-2A chain                                                              | IPI00013475,IPI00031370                                     | 49,889.10 | 325 | 336 | EVDEQMLNVQNK           | K | N | 1,462.68 |
| 4699 | NONO Non-POU domain-containing octamer-binding protein                                    | IPI00304596                                                 | 54,213.60 | 325 | 336 | RMEELHNQEVQK           | R | R | 1,540.75 |
| 4700 | ACOT7 Isoform 1 of Cytosolic acyl coenzyme A thioester hydrolase                          | IPI00010415,IPI00219451,IPI00219452,IPI00395748             | 41,777.00 | 325 | 340 | AASAFFTYVLSQEGR        | R | S | 1,733.85 |
| 4701 | MCM5 DNA replication licensing factor MCM5                                                | IPI00018350,IPI00877948,IPI00878310,IPI00878587             | 82,270.30 | 325 | 337 | LAALPNVYEISK           | R | S | 1,416.81 |
| 4702 | THOC6 Isoform 1 of THO complex subunit 6 homolog                                          | IPI00328985,IPI00641826                                     | 37,517.00 | 326 | 335 | VDVFTNLGYR             | R | A | 1,183.61 |
| 4703 | EIF4A2 Isoform 1 of Eukaryotic initiation factor 4A-II                                    | IPI00328328,IPI00409717                                     | 46,385.60 | 326 | 335 | VLITDLLAR              | R | G | 1,114.68 |
| 4704 | HSPA1A;HSPA1B Heat shock 70 kDa protein 1                                                 | IPI00304925                                                 | 70,036.00 | 326 | 342 | LDKAIQIHDVLVGGSTR      | K | I | 1,822.02 |
| 4705 | HSPA1A;HSPA1B Heat shock 70 kDa protein 1                                                 | IPI00304925                                                 | 70,036.00 | 326 | 342 | LDKAIQIHDVLVGGSTR      | K | I | 1,822.02 |
| 4706 | HSPA8 Isoform 1 of Heat shock cognate 71 kDa protein                                      | IPI00003865                                                 | 70,881.80 | 326 | 342 | LDKSIQIHDIVLVGGSTR     | K | I | 1,838.01 |
| 4707 | NONO Non-POU domain-containing octamer-binding protein                                    | IPI00304596                                                 | 54,213.60 | 326 | 336 | MEELHNQEVQK            | R | R | 1,384.65 |
| 4708 | GMPS GMP synthase [glutamine-hydrolyzing]                                                 | IPI00029079                                                 | 76,698.70 | 326 | 336 | TLNMTTSPEEK            | K | R | 1,266.59 |
| 4709 | HSPA5 HSPA5 protein                                                                       | IPI00003362                                                 | 72,405.60 | 326 | 337 | AKFEELNMDLFR           | R | S | 1,512.75 |
| 4710 | PTBP1 Isoform 1 of Polypyrimidine tract-binding protein 1                                 | IPI00179964,IPI00183626,IPI00334175                         | 57,204.50 | 326 | 348 | IAIPGLAGAGNSVLLVSNLNPE | R | V | 2,275.28 |
| 4711 | PSMD11 Proteasome 26S non-ATPase subunit 11 variant (Fragment)                            | IPI00105598                                                 | 47,519.40 | 326 | 337 | LYDNLLEQLIR            | K | V | 1,503.82 |
| 4712 | HNRNPH2 Heterogeneous nuclear ribonucleoprotein H2                                        | IPI00026230                                                 | 49,246.10 | 327 | 347 | VTGEADVFEFATHEDAVAAMA  | R | D | 2,178.00 |
| 4713 | HNRNPH1 Heterogeneous nuclear ribonucleoprotein H                                         | IPI00013881,IPI00479191                                     | 49,211.80 | 327 | 347 | VTGEADVFEFATHEDAVAAMS  | R | D | 2,178.00 |
| 4714 | HNRNPH1 Heterogeneous nuclear ribonucleoprotein H                                         | IPI00013881,IPI00479191                                     | 49,211.80 | 327 | 347 | VTGEADVFEFATHEDAVAAMS  | R | D | 2,194.00 |
| 4715 | HNRNPF Heterogeneous nuclear ribonucleoprotein F                                          | IPI00003881                                                 | 45,653.80 | 327 | 347 | VTGEADVFEFATHEEAVAAMSK | R | D | 2,192.02 |
| 4716 | TKT cDNA FLJ54957, highly similar to Transketolase                                        | IPI00643920                                                 | 68,725.40 | 327 | 335 | KAYGQALAK              | R | L | 949.5466 |
| 4717 | NUSAP1 Isoform 2 of Nucleolar and spindle-associated protein 1                            | IPI00020484                                                 | 49,306.70 | 327 | 340 | TITGNSAAVITPFK         | K | L | 1,419.78 |
| 4718 | TUBA1A Tubulin alpha-1A chain                                                             | IPI00180675                                                 | 50,117.70 | 327 | 336 | DVNAAIATIK             | K | T | 1,015.58 |
| 4719 | TUBA1A Tubulin alpha-1A chain                                                             | IPI00180675                                                 | 50,117.70 | 327 | 336 | DVNAAIATIK             | K | T | 1,015.58 |
| 4720 | TUBA1A Tubulin alpha-1A chain                                                             | IPI00180675                                                 | 50,117.70 | 327 | 336 | DVNAAIATIK             | K | T | 1,015.58 |
| 4721 | TUBA1A Tubulin alpha-1A chain                                                             | IPI00180675                                                 | 50,117.70 | 327 | 336 | DVNAAIATIK             | K | T | 1,015.58 |
| 4722 | TUBA1C Tubulin alpha-1C chain                                                             | IPI00218343                                                 | 49,877.40 | 327 | 336 | DVNAAIATIK             | K | T | 1,015.58 |
| 4723 | TUBA1B Tubulin alpha-1B chain                                                             | IPI00387144,IPI00792677                                     | 50,133.70 | 327 | 336 | DVNAAIATIK             | K | T | 1,015.58 |
| 4724 | TUBA1B Tubulin alpha-1B chain                                                             | IPI00387144,IPI00792677                                     | 50,133.70 | 327 | 336 | DVNAAIATIK             | K | T | 1,015.58 |
| 4725 | GNL3L Guanine nucleotide-binding protein-like 3-like protein                              | IPI00005132,IPI00871959                                     | 65,555.30 | 328 | 341 | LADPVPVETILQR          | K | C | 1,551.87 |
| 4726 | - cDNA FLJ54554, highly similar to Pyruvate kinase isozymes M1/M2                         | IPI00910979                                                 | 56,255.30 | 328 | 361 | AEGSDVANAVLDGADCIMLS   | R | M | 3,510.64 |
| 4727 | PSMC3 26S protease regulatory subunit 6A                                                  | IPI00018398                                                 | 49,187.00 | 328 | 344 | GETAKGDYPLEAVR         | K | S | 1,850.09 |
| 4728 | HSPA1A;HSPA1B Heat shock 70 kDa protein 1                                                 | IPI00304925                                                 | 70,036.00 | 329 | 342 | AQIHDVLVGGSTR          | K | I | 1,465.81 |
| 4729 | HSPA1A;HSPA1B Heat shock 70 kDa protein 1                                                 | IPI00304925                                                 | 70,036.00 | 329 | 342 | AQIHDVLVGGSTR          | K | I | 1,465.81 |
| 4730 | HSPA8 Isoform 1 of Heat shock cognate 71 kDa protein                                      | IPI00003865                                                 | 70,881.80 | 329 | 342 | SQIHDIVLVGGSTR         | K | I | 1,481.81 |
| 4731 | CAMK2D Isoform Delta 6 of Calcium/calmodulin-dependent protein kinase type II delta chain | IPI00172636,IPI00430291,IPI00827573,IPI00827625,IPI00876923 | 54,111.10 | 329 | 346 | ESTESSNTTIEDEDVKAR     | K | K | 2,010.91 |
| 4732 | TXLNA Alpha-taxilin                                                                       | IPI00470779                                                 | 61,873.20 | 329 | 340 | HKDLQQQLVDAK           | K | L | 1,422.77 |
| 4733 | EIF4A3 Eukaryotic initiation factor 4A-III                                                | IPI00009328                                                 | 46,854.40 | 330 | 339 | VLISTDVWAR             | R | G | 1,159.65 |

|      |                                                                                 |                                                 |            |     |     |                       |   |   |          |
|------|---------------------------------------------------------------------------------|-------------------------------------------------|------------|-----|-----|-----------------------|---|---|----------|
| 4734 | EHD1 EH domain-containing protein 1                                             | IPI00017184                                     | 60,611.10  | 330 | 341 | ELVNNLGEIYQK          | K | I | 1,419.75 |
| 4735 | CCT3 chaperonin containing TCP1, subunit 3 isoform b                            | IPI00290770,IPI00553185                         | 60,446.30  | 330 | 353 | IVSRPEELREDDVGTGAGLLE | R | I | 2,624.43 |
| 4736 | CCT3 chaperonin containing TCP1, subunit 3 isoform b                            | IPI00290770,IPI00553185                         | 60,446.30  | 330 | 353 | IVSRPEELREDDVGTGAGLLE | R | I | 2,624.43 |
| 4737 | CCT3 chaperonin containing TCP1, subunit 3 isoform b                            | IPI00290770,IPI00553185                         | 60,446.30  | 330 | 352 | IVSRPEELREDDVGTGAGLLE | R | K | 2,496.33 |
| 4738 | CCT3 chaperonin containing TCP1, subunit 3 isoform b                            | IPI00290770,IPI00553185                         | 60,446.30  | 330 | 352 | IVSRPEELREDDVGTGAGLLE | R | K | 2,496.33 |
| 4739 | DDX17 DEAD box polypeptide 17 isoform 1                                         | IPI00023785,IPI00651653                         | 80,256.00  | 330 | 340 | MLDMGFPEQIR           | R | K | 1,352.63 |
| 4740 | RBM39 Isoform 1 of RNA-binding protein 39                                       | IPI00163505,IPI00215801                         | 59,363.40  | 330 | 346 | TDASSASSFLDSDELER     | R | T | 1,829.80 |
| 4741 | IGF2BP1 Insulin-like growth factor 2 mRNA-binding protein 1                     | IPI00008557                                     | 63,438.30  | 331 | 338 | GAIENCCR              | K | A | 979.4085 |
| 4742 | FSCN1 Fascin                                                                    | IPI00163187,IPI00747810                         | 54,512.30  | 331 | 341 | NASCYFDIEWR           | K | D | 1,460.63 |
| 4743 | HSP90AB1 Heat shock protein HSP 90-beta                                         | IPI00414676                                     | 83,249.30  | 331 | 337 | ALLFIPR               | R | R | 829.5295 |
| 4744 | HSP90AB1 Heat shock protein HSP 90-beta                                         | IPI00414676                                     | 83,249.30  | 331 | 337 | ALLFIPR               | R | R | 829.5295 |
| 4745 | ALDOA Fructose-bisphosphate aldolase A                                          | IPI00465439                                     | 39,402.60  | 331 | 342 | RALANSLACQGK          | K | Y | 1,288.68 |
| 4746 | ADD1 Isoform 1 of Alpha-adducin                                                 | IPI00019901,IPI00220158,IPI000376220            | 80,937.90  | 331 | 348 | TLASAGGPDNLVLLNPEK    | R | Y | 1,808.98 |
| 4747 | FKBP4 FK506-binding protein 4                                                   | IPI00219005                                     | 51,787.90  | 332 | 344 | LQAFSAAIESCNK         | K | A | 1,438.70 |
| 4748 | PABPC1 Isoform 1 of Polyadenylate-binding protein 1                             | IPI00008524                                     | 70,653.30  | 332 | 348 | SKGFGFVCFSSPEEATK     | R | A | 1,877.87 |
| 4749 | PABPC4 Isoform 1 of Polyadenylate-binding protein 4                             | IPI00012726,IPI00555747,IPI00642904,IPI00642944 | 70,765.80  | 332 | 348 | SKGFGFVCFSSPEEATK     | R | A | 1,877.87 |
| 4750 | HSP90AA1 heat shock protein 90kDa alpha (cytosolic), class A member 1 isoform 1 | IPI00382470,IPI00784295                         | 98,147.10  | 332 | 348 | HSQFIGYPITLFVEKER     | K | D | 2,064.09 |
| 4751 | PELO Protein pelota homolog                                                     | IPI00106698                                     | 43,358.40  | 332 | 344 | LVDSVKENAGTVR         | R | I | 1,387.75 |
| 4752 | PGD 6-phosphogluconate dehydrogenase, decarboxylating                           | IPI00219525,IPI00747533                         | 53,123.90  | 332 | 343 | IISYAQGFMLLR          | K | Q | 1,427.77 |
| 4753 | DDX5 Probable ATP-dependent RNA helicase DDX5                                   | IPI00017617                                     | 69,131.70  | 332 | 343 | LMEEIMSEKENK          | R | T | 1,512.69 |
| 4754 | HNRNPU heterogeneous nuclear ribonucleoprotein U isoform a                      | IPI00644079                                     | 90,567.20  | 332 | 339 | GKVCFEMK              | K | V | 998.4799 |
| 4755 | CSE1L Isoform 1 of Exportin-2                                                   | IPI00022744,IPI00219994                         | 110,403.90 | 332 | 346 | NLFEDQNTLTSICEK       | K | V | 1,811.85 |
| 4756 | ALDOA Fructose-bisphosphate aldolase A                                          | IPI00465439                                     | 39,402.60  | 332 | 342 | ALANSLACQGK           | R | Y | 1,132.58 |
| 4757 | EIF3CL;EIF3C Eukaryotic translation initiation factor 3 subunit C               | IPI00016910,IPI00646839,IPI00873286,IPI00910003 | 105,329.20 | 333 | 340 | LNEILQAR              | K | G | 956.5524 |
| 4758 | ILF3 Isoform 1 of Interleukin enhancer-binding factor 3                         | IPI00298788                                     | 95,320.90  | 333 | 342 | VLGMDPLPSK            | K | M | 1,056.58 |
| 4759 | SERPINB6 Putative uncharacterized protein DKFZp686I04222                        | IPI00413451,IPI00749398                         | 46,353.40  | 333 | 347 | ADFSGMSQTDLSLSK       | K | V | 1,602.73 |
| 4760 | GDI2 cDNA FLJ60299, highly similar to Rab GDP dissociation inhibitor beta       | IPI00031461                                     | 51,138.50  | 333 | 352 | KSDIYVCMISFAHNVAAGQK  | R | Y | 2,239.10 |
| 4761 | GDI2 cDNA FLJ60299, highly similar to Rab GDP dissociation inhibitor beta       | IPI00031461                                     | 51,138.50  | 333 | 352 | KSDIYVCMISFAHNVAAGQK  | R | Y | 2,239.10 |
| 4762 | PABPC1 Isoform 1 of Polyadenylate-binding protein 1                             | IPI00008524                                     | 70,653.30  | 334 | 348 | GFGFVCFSSPEEATK       | K | A | 1,662.75 |
| 4763 | PABPC4 Isoform 1 of Polyadenylate-binding protein 4                             | IPI00012726,IPI00555747,IPI00642904,IPI00642944 | 70,765.80  | 334 | 348 | GFGFVCFSSPEEATK       | K | A | 1,662.75 |
| 4764 | NCL Nucleolin                                                                   | IPI00604620                                     | 76,597.90  | 334 | 342 | NDLAVVDVR             | K | I | 1,000.54 |
| 4765 | LCP1 Plastin-2                                                                  | IPI00010471                                     | 70,274.10  | 334 | 343 | AECMLQQAER            | R | L | 1,251.55 |
| 4766 | RCC2 Protein RCC2                                                               | IPI00465044                                     | 56,066.80  | 334 | 350 | DVACGANHTLVLDSQKR     | R | V | 1,883.94 |
| 4767 | DDX3X ATP-dependent RNA helicase DDX3X                                          | IPI00215637                                     | 73,227.70  | 334 | 342 | GKIGLDFCK             | R | Y | 1,037.55 |
| 4768 | C1orf58 BRO1 domain-containing protein BROX                                     | IPI00065500                                     | 46,459.90  | 335 | 345 | IPTEAPQLELK           | K | A | 1,238.70 |
| 4769 | EEF1G cDNA FLJ56389, highly similar to Elongation factor 1-gamma                | IPI00000875,IPI00747497                         | 56,132.90  | 336 | 345 | STFVLDEFKR            | K | K | 1,241.65 |
| 4770 | AHCY Adenosylhomocysteinase                                                     | IPI00012007                                     | 47,699.10  | 336 | 343 | IILLAAGR              | R | L | 884.5565 |
| 4771 | DDX3X ATP-dependent RNA helicase DDX3X                                          | IPI00215637                                     | 73,227.70  | 336 | 342 | IGLDFCK               | K | Y | 852.4286 |
| 4772 | CTPS CTP synthase 1                                                             | IPI00290142                                     | 66,672.70  | 336 | 353 | YIDSADLEPITSQEEPVR    | K | Y | 2,062.00 |



|      |                                                                    |                                                                         |            |     |     |                           |   |   |          |
|------|--------------------------------------------------------------------|-------------------------------------------------------------------------|------------|-----|-----|---------------------------|---|---|----------|
| 4773 | MTHFD1 C-1-tetrahydrofolate synthase, cytoplasmic                  | IPI00218342,IPI00794900                                                 | 101,543.50 | 337 | 352 | EIGLLSEEVERYGETK          | R | A | 1,808.92 |
| 4774 | CNP Isoform CNPI of 2',3'-cyclic-nucleotide 3'-phosphodiesterase   | IPI00220993,IPI00306667                                                 | 45,082.30  | 337 | 349 | GGSRGEEVGLSR              | K | G | 1,332.65 |
| 4775 | JUP Junction plakoglobin                                           | IPI00554711                                                             | 81,727.90  | 337 | 359 | VLSVCP SNKPAIVEAGGMQAL GK | K | H | 2,326.23 |
| 4776 | PLS3 plastin 3                                                     | IPI00216694                                                             | 70,795.90  | 337 | 346 | AESMLQQADK                | R | L | 1,136.53 |
| 4777 | HNRNPA1 Isoform A1-B of Heterogeneous nuclear ribonucleoprotein A1 | IPI00215965,IPI00465365                                                 | 38,828.10  | 337 | 352 | SSGPYGGGGQYFAKPR          | R | N | 1,628.78 |
| 4778 | HAT1 Histone acetyltransferase type B catalytic subunit            | IPI00024719                                                             | 49,496.20  | 337 | 349 | LLVTDMSDAEQYR             | R | S | 1,556.73 |
| 4779 | TUBB2C Tubulin beta-2C chain                                       | IPI00007752                                                             | 49,812.70  | 337 | 350 | NSSYFVEWIPNNVK            | K | T | 1,696.83 |
| 4780 | TUBB2C Tubulin beta-2C chain                                       | IPI00007752                                                             | 49,812.70  | 337 | 350 | NSSYFVEWIPNNVK            | K | T | 1,696.83 |
| 4781 | TUBB2C Tubulin beta-2C chain                                       | IPI00007752                                                             | 49,812.70  | 337 | 350 | NSSYFVEWIPNNVK            | K | T | 1,696.83 |
| 4782 | TUBB Tubulin beta chain                                            | IPI00011654                                                             | 49,652.60  | 337 | 350 | NSSYFVEWIPNNVK            | K | T | 1,696.83 |
| 4783 | TUBB Tubulin beta chain                                            | IPI00011654                                                             | 49,652.60  | 337 | 350 | NSSYFVEWIPNNVK            | K | T | 1,696.83 |
| 4784 | TUBB Tubulin beta chain                                            | IPI00011654                                                             | 49,652.60  | 337 | 350 | NSSYFVEWIPNNVK            | K | T | 1,696.83 |
| 4785 | TUBB2A Tubulin beta-2A chain                                       | IPI00013475,IPI00031370                                                 | 49,889.10  | 337 | 350 | NSSYFVEWIPNNVK            | K | T | 1,696.83 |
| 4786 | TUBB2A Tubulin beta-2A chain                                       | IPI00013475,IPI00031370                                                 | 49,889.10  | 337 | 350 | NSSYFVEWIPNNVK            | K | T | 1,696.83 |
| 4787 | GNB2L1 38 kDa protein                                              | IPI00641950,IPI00848226                                                 | 37,740.10  | 338 | 346 | VWQVTIGTR                 | R | - | 1,059.59 |
| 4788 | EHD4 EH domain-containing protein 4                                | IPI00005578                                                             | 61,159.60  | 338 | 347 | LPEIYQLQR                 | R | E | 1,272.73 |
| 4789 | NOP5/NOP58 Nucleolar protein 5                                     | IPI00006379                                                             | 59,562.20  | 338 | 353 | YGLIYHASLVGQTSPK          | K | H | 1,733.92 |
| 4790 | HSP90AB1 Heat shock protein HSP 90-beta                            | IPI00414676                                                             | 83,249.30  | 338 | 348 | RAPFDLFENKK               | R | K | 1,364.73 |
| 4791 | PAF1 Isoform 1 of RNA polymerase II-associated factor 1 homolog    | IPI00300333                                                             | 59,958.00  | 339 | 352 | AGVQSGTNALLVVK            | K | H | 1,356.78 |
| 4792 | DARS Aspartyl-tRNA synthetase, cytoplasmic                         | IPI00216951                                                             | 57,118.70  | 339 | 345 | FLEPTLR                   | K | L | 875.4986 |
| 4793 | XRCC5 ATP-dependent DNA helicase 2 subunit 2                       | IPI00220834,IPI00871391                                                 | 82,689.10  | 339 | 347 | CFSVLGFCK                 | K | S | 1,117.52 |
| 4794 | COPG2 Coatomer subunit gamma-2                                     | IPI00002557                                                             | 97,606.50  | 339 | 350 | SIATLAITTLK               | R | T | 1,244.78 |
| 4795 | COPG Coatomer subunit gamma                                        | IPI00783982                                                             | 97,701.40  | 339 | 350 | SIATLAITTLK               | R | T | 1,244.78 |
| 4796 | TUBA1A Tubulin alpha-1A chain                                      | IPI00180675                                                             | 50,117.70  | 339 | 352 | RTIQFVDWCPTGFK            | K | V | 1,754.87 |
| 4797 | TUBA1C Tubulin alpha-1C chain                                      | IPI00218343                                                             | 49,877.40  | 339 | 352 | RTIQFVDWCPTGFK            | K | V | 1,754.87 |
| 4798 | HNRNPU heterogeneous nuclear ribonucleoprotein U isoform a         | IPI00644079                                                             | 90,567.20  | 340 | 347 | VTEKIPVR                  | K | H | 941.5779 |
| 4799 | HNRNPU heterogeneous nuclear ribonucleoprotein U isoform a         | IPI00644079                                                             | 90,567.20  | 340 | 347 | VTEKIPVR                  | K | H | 941.5779 |
| 4800 | MCCC1 Methylcrotonoyl-CoA carboxylase subunit alpha, mitochondrial | IPI00024580,IPI00792499                                                 | 80,455.60  | 340 | 361 | LQVEHPVTEMITGTDLVEWQL R   | R | I | 2,610.32 |
| 4801 | COPB1 Coatomer subunit beta                                        | IPI00295851                                                             | 107,128.00 | 340 | 351 | TLQLALDLVSSR              | K | N | 1,315.76 |
| 4802 | APEH Acylamino-acid-releasing enzyme                               | IPI00337741                                                             | 81,206.00  | 340 | 350 | VTSVVVDVPR                | K | Q | 1,169.69 |
| 4803 | LTA4H Isoform 1 of Leukotriene A-4 hydrolase                       | IPI00219077                                                             | 69,269.10  | 340 | 355 | HFNALGGWGELQNSVK          | R | T | 1,756.88 |
| 4804 | RUVBL1 Isoform 1 of RuvB-like 1                                    | IPI00021187                                                             | 50,211.40  | 340 | 357 | GTEDITSPHGIPLDLLDR        | R | V | 1,949.00 |
| 4805 | TUBA1B Tubulin alpha-1B chain                                      | IPI00387144,IPI00792677                                                 | 50,133.70  | 340 | 352 | SIQFVDWCPTGFK             | R | V | 1,584.75 |
| 4806 | TUBA1B Tubulin alpha-1B chain                                      | IPI00387144,IPI00792677                                                 | 50,133.70  | 340 | 352 | SIQFVDWCPTGFK             | R | V | 1,584.75 |
| 4807 | TUBA1A Tubulin alpha-1A chain                                      | IPI00180675                                                             | 50,117.70  | 340 | 352 | TIQFVDWCPTGFK             | R | V | 1,598.77 |
| 4808 | TUBA1A Tubulin alpha-1A chain                                      | IPI00180675                                                             | 50,117.70  | 340 | 352 | TIQFVDWCPTGFK             | R | V | 1,598.77 |
| 4809 | TUBA1C Tubulin alpha-1C chain                                      | IPI00218343                                                             | 49,877.40  | 340 | 352 | TIQFVDWCPTGFK             | R | V | 1,598.77 |
| 4810 | DNM1L Isoform 5 of Dynamin-1-like protein                          | IPI00037283,IPI00146935,IPI00235412,IPI00473085,IPI00555883,IPI00871742 | 79,093.20  | 340 | 353 | FATEYCNTIEGTAK            | K | Y | 1,604.73 |
| 4811 | DNM1L Isoform 5 of Dynamin-1-like protein                          | IPI00037283,IPI00146935,IPI00235412,IPI00473085,IPI00555883,IPI00871742 | 79,093.20  | 340 | 353 | FATEYCNTIEGTAK            | K | Y | 1,604.73 |
| 4812 | ZC3H15 Similar to DRG family regulatory protein 1                  | IPI00000279                                                             | 49,126.30  | 341 | 354 | DVDETGITVASLER            | R | F | 1,504.75 |
| 4813 | POLD2 DNA polymerase delta subunit 2                               | IPI00025616,IPI00909525                                                 | 51,272.00  | 341 | 354 | FLGTSGQNVSDIFR            | R | Y | 1,540.78 |
| 4814 | RARS Isoform Complexed of Arginyl-tRNA synthetase, cytoplasmic     | IPI00004860                                                             | 75,364.00  | 342 | 352 | MNDIVKEFEDR               | R | G | 1,411.65 |
| 4815 | PSMD13 proteasome 26S non-ATPase subunit 13 isoform 2              | IPI00375380,IPI00549672                                                 | 42,924.90  | 342 | 349 | VLDLQGIK                  | R | G | 956.5777 |
| 4816 | PRPF6 Pre-mRNA-processing factor 6                                 | IPI00305068                                                             | 106,909.70 | 342 | 351 | SEDVWLEAAR                | K | L | 1,175.57 |

|      |                                                                    |                                                                                                             |            |     |     |                                        |   |   |          |
|------|--------------------------------------------------------------------|-------------------------------------------------------------------------------------------------------------|------------|-----|-----|----------------------------------------|---|---|----------|
| 4817 | ILK Integrin-linked protein kinase                                 | IPI00013219                                                                                                 | 51,401.70  | 342 | 349 | FSFQCPCR                               | K | M | 998.4513 |
| 4818 | IGHA1;IGHV3OR16-13 SNC66 protein                                   | IPI00383164,IPI00386879,IPI00423460,IPI00426060,IPI00430842,IPI00449920,IPI00644497,IPI00719233,IPI00744561 | 53,069.40  | 342 | 353 | TFTCTAAYPESK                           | K | T | 1,375.62 |
| 4819 | RBM4 Isoform 1 of RNA-binding protein 4                            | IPI00003704                                                                                                 | 40,296.20  | 342 | 349 | NSLYDMAR                               | R | Y | 985.4408 |
| 4820 | RBM4 Isoform 1 of RNA-binding protein 4                            | IPI00003704                                                                                                 | 40,296.20  | 342 | 349 | NSLYDMAR                               | R | Y | 985.4408 |
| 4821 | ALDOA Fructose-bisphosphate aldolase A                             | IPI00465439                                                                                                 | 39,402.60  | 343 | 364 | YTPSGQAGAAASESLFVSNH<br>AY             | K | - | 2,228.03 |
| 4822 | LAP3 Isoform 1 of Cytosol aminopeptidase                           | IPI00419237,IPI00789806                                                                                     | 56,149.70  | 343 | 351 | ANKPGDVVR                              | K | A | 955.532  |
| 4823 | SFPQ Isoform Long of Splicing factor, proline- and glutamine-rich  | IPI00010740                                                                                                 | 76,131.50  | 343 | 358 | ALAEIAKAELDDTPMR                       | R | G | 1,743.89 |
| 4824 | PKM2 Isoform M1 of Pyruvate kinase isozymes M1/M2                  | IPI00220644,IPI00479186                                                                                     | 58,044.60  | 343 | 376 | AEGSDVANAVLDGADCIMLS<br>GETAKGDYPLEAVR | R | M | 3,510.64 |
| 4825 | DDX3X ATP-dependent RNA helicase DDX3X                             | IPI00215637                                                                                                 | 73,227.70  | 343 | 351 | YLVLDEADR                              | K | M | 1,093.55 |
| 4826 | TKT cDNA FLJ54957, highly similar to Transketolase                 | IPI00643920                                                                                                 | 68,725.40  | 343 | 351 | IIALDGDTK                              | R | N | 945.5254 |
| 4827 | ENO2 Gamma-enolase                                                 | IPI00216171                                                                                                 | 47,251.70  | 344 | 358 | VNQIGSVTEAIQACK                        | K | L | 1,617.83 |
| 4828 | ENO1 Isoform alpha-enolase of Alpha-enolase                        | IPI00465248                                                                                                 | 47,152.20  | 344 | 358 | VNQIGSVTESLQACK                        | K | L | 1,633.82 |
| 4829 | ENO1 Isoform alpha-enolase of Alpha-enolase                        | IPI00465248                                                                                                 | 47,152.20  | 344 | 358 | VNQIGSVTESLQACK                        | K | L | 1,633.82 |
| 4830 | ENO1 Isoform alpha-enolase of Alpha-enolase                        | IPI00465248                                                                                                 | 47,152.20  | 344 | 358 | VNQIGSVTESLQACK                        | K | L | 1,633.82 |
| 4831 | ENO1 Isoform alpha-enolase of Alpha-enolase                        | IPI00465248                                                                                                 | 47,152.20  | 344 | 358 | VNQIGSVTESLQACK                        | K | L | 1,633.82 |
| 4832 | ENO1 Isoform alpha-enolase of Alpha-enolase                        | IPI00465248                                                                                                 | 47,152.20  | 344 | 358 | VNQIGSVTESLQACK                        | K | L | 1,633.82 |
| 4833 | TTC4 Tetratricopeptide repeat protein 4                            | IPI00000606,IPI00514593                                                                                     | 44,662.10  | 344 | 354 | STLLQLVLQHQR                           | K | Y | 1,322.75 |
| 4834 | CORO1C Coronin-1C_i3 protein                                       | IPI00867509                                                                                                 | 58,930.80  | 345 | 364 | YFEITDESPYVHYLNTFSSK                   | R | E | 2,440.13 |
| 4835 | FKBP4 FK506-binding protein 4                                      | IPI00219005                                                                                                 | 51,787.90  | 345 | 354 | ALELDSNNEK                             | K | G | 1,132.55 |
| 4836 | HNRNPR heterogeneous nuclear ribonucleoprotein R isoform 1         | IPI00644055                                                                                                 | 71,197.20  | 345 | 349 | VLVFR                                  | K | N | 633.4082 |
| 4837 | HNRNPL Heterogeneous nuclear ribonucleoprotein L                   | IPI00027834                                                                                                 | 64,114.80  | 345 | 353 | MGPPVGGHR                              | R | R | 923.4518 |
| 4838 | CCT7 T-complex protein 1 subunit eta                               | IPI00018465                                                                                                 | 59,349.80  | 345 | 357 | CQVFEETQIGGER                          | R | Y | 1,552.71 |
| 4839 | TTL12 Tubulin--tyrosine ligase-like protein 12                     | IPI00029048,IPI00879002                                                                                     | 74,385.70  | 347 | 368 | LSQERPGVLLNQFPCENLLTV<br>K             | K | D | 2,555.37 |
| 4840 | EDC3 Enhancer of mRNA-decapping protein 3                          | IPI00018009                                                                                                 | 56,059.40  | 347 | 355 | GAQGISCGR                              | K | H | 905.4259 |
| 4841 | EHD4 EH domain-containing protein 4                                | IPI00005578                                                                                                 | 61,159.60  | 348 | 360 | EYQISAGDFPEVK                          | R | A | 1,482.71 |
| 4842 | NCL Nucleolin                                                      | IPI00604620                                                                                                 | 76,597.90  | 348 | 362 | KFGYVDFESAEDLEK                        | R | A | 1,776.83 |
| 4843 | TRIM28 Isoform 1 of Transcription intermediary factor 1-beta       | IPI00438229,IPI00438230                                                                                     | 88,531.00  | 348 | 365 | FASWALESNDNTALLLSK                     | R | K | 1,980.01 |
| 4844 | GNL3 Isoform 2 of Guanine nucleotide-binding protein-like 3        | IPI00003886,IPI00306380                                                                                     | 60,527.60  | 348 | 359 | NSLEFFTMLAQR                           | R | R | 1,472.72 |
| 4845 | NCL Nucleolin                                                      | IPI00604620                                                                                                 | 76,597.90  | 349 | 362 | FGYVDFESAEDLEK                         | K | A | 1,648.74 |
| 4846 | NUP107 Nuclear pore complex protein Nup107                         | IPI00028005                                                                                                 | 106,358.70 | 349 | 355 | YLFTLIR                                | K | A | 925.5506 |
| 4847 | HSPA1A;HSPA1B Heat shock 70 kDa protein 1                          | IPI00304925                                                                                                 | 70,036.00  | 349 | 357 | LLQDFFNGR                              | K | D | 1,109.57 |
| 4848 | HSPA1A;HSPA1B Heat shock 70 kDa protein 1                          | IPI00304925                                                                                                 | 70,036.00  | 349 | 357 | LLQDFFNGR                              | K | D | 1,109.57 |
| 4849 | HSPA1A;HSPA1B Heat shock 70 kDa protein 1                          | IPI00304925                                                                                                 | 70,036.00  | 349 | 357 | LLQDFFNGR                              | K | D | 1,109.57 |
| 4850 | HSPA8 Isoform 1 of Heat shock cognate 71 kDa protein               | IPI00003865                                                                                                 | 70,881.80  | 349 | 357 | LLQDFFN GK                             | K | E | 1,081.57 |
| 4851 | ACSL3 Long-chain-fatty-acid--CoA ligase 3                          | IPI00031397                                                                                                 | 80,405.10  | 349 | 363 | IGYSSPQTLADQSSK                        | R | I | 1,581.78 |
| 4852 | HSPA1A;HSPA1B Heat shock 70 kDa protein 1                          | IPI00304925                                                                                                 | 70,036.00  | 349 | 361 | LLQDFFNGRDLNK                          | K | S | 1,579.82 |
| 4853 | TOP1 DNA topoisomerase 1                                           | IPI00413611                                                                                                 | 90,711.70  | 350 | 362 | IANFKIEPPGLFR                          | R | G | 1,501.85 |
| 4854 | RDBP cDNA FLJ56180, highly similar to Negative elongation factor E | IPI00000858                                                                                                 | 43,907.90  | 350 | 362 | SVWGSGLAVQNSPK                         | K | G | 1,372.72 |
| 4855 | ILK Integrin-linked protein kinase                                 | IPI00013219                                                                                                 | 51,401.70  | 350 | 363 | MYAPAWVAPEALQK                         | R | K | 1,574.80 |
| 4856 | DNAJB12 DnaJ (Hsp40) homolog, subfamily B, member 12               | IPI00014400                                                                                                 | 45,472.60  | 350 | 360 | NVEDDYIANLR                            | R | N | 1,321.64 |
| 4857 | WARS Tryptophanyl-tRNA synthetase, cytoplasmic                     | IPI00295400                                                                                                 | 53,149.60  | 350 | 366 | MSASDPNSSIFLTD TAK                     | K | Q | 1,800.83 |
| 4858 | ZNHIT6 Zinc finger HIT domain-containing protein 6                 | IPI00100468,IPI00909739                                                                                     | 53,900.40  | 350 | 362 | LQFPQSQA EYIEK                         | K | R | 1,580.80 |
| 4859 | HNRNPR heterogeneous nuclear ribonucleoprotein R isoform 1         | IPI00644055                                                                                                 | 71,197.20  | 350 | 362 | NLATTVTEIELEK                          | R | S | 1,460.78 |



|      |                                                                                           |                                                                         |            |     |     |                            |   |   |          |
|------|-------------------------------------------------------------------------------------------|-------------------------------------------------------------------------|------------|-----|-----|----------------------------|---|---|----------|
| 4860 | HNRNPR heterogeneous nuclear ribonucleoprotein R isoform 1                                | IP100644055                                                             | 71,197.20  | 350 | 362 | NLATTVTEEILEK              | R | S | 1,460.78 |
| 4861 | TUBB2C Tubulin beta-2C chain                                                              | IP100007752                                                             | 49,812.70  | 351 | 359 | TAVCDIPPR                  | K | G | 1,028.52 |
| 4862 | TUBB2C Tubulin beta-2C chain                                                              | IP100007752                                                             | 49,812.70  | 351 | 359 | TAVCDIPPR                  | K | G | 1,028.52 |
| 4863 | TUBB2C Tubulin beta-2C chain                                                              | IP100007752                                                             | 49,812.70  | 351 | 359 | TAVCDIPPR                  | K | G | 1,028.52 |
| 4864 | TUBB Tubulin beta chain                                                                   | IP100011654                                                             | 49,652.60  | 351 | 359 | TAVCDIPPR                  | K | G | 1,028.52 |
| 4865 | TUBB Tubulin beta chain                                                                   | IP100011654                                                             | 49,652.60  | 351 | 359 | TAVCDIPPR                  | K | G | 1,028.52 |
| 4866 | TUBB Tubulin beta chain                                                                   | IP100011654                                                             | 49,652.60  | 351 | 359 | TAVCDIPPR                  | K | G | 1,028.52 |
| 4867 | TUBB2A Tubulin beta-2A chain                                                              | IP100013475,IP100031370                                                 | 49,889.10  | 351 | 359 | TAVCDIPPR                  | K | G | 1,028.52 |
| 4868 | TUBB2A Tubulin beta-2A chain                                                              | IP100013475,IP100031370                                                 | 49,889.10  | 351 | 359 | TAVCDIPPR                  | K | G | 1,028.52 |
| 4869 | COPG Coatomer subunit gamma                                                               | IP100783982                                                             | 97,701.40  | 351 | 359 | TGSESSIDR                  | K | L | 951.4378 |
| 4870 | COPB1 Coatomer subunit beta                                                               | IP100295851                                                             | 107,128.00 | 352 | 362 | NVEELVIVLKK                | R | E | 1,283.79 |
| 4871 | PSAT1 cDNA FLJ56437, highly similar to Phosphoserine aminotransferase                     | IP100001734                                                             | 45,338.10  | 352 | 364 | IGNAKGDDALEKR              | R | F | 1,386.73 |
| 4872 | MCM5 DNA replication licensing factor MCM5                                                | IP100018350,IP100877948,IP100878310,IP100878587                         | 82,270.30  | 352 | 362 | AIACLLFGGSR                | K | K | 1,164.62 |
| 4873 | LMNA Isoform A of Lamin-A/C                                                               | IP100021405                                                             | 74,122.60  | 352 | 366 | MQQQLDHEYQELLDIK           | R | L | 1,909.92 |
| 4874 | PHGDH D-3-phosphoglycerate dehydrogenase                                                  | IP100011200                                                             | 56,632.60  | 352 | 364 | GTIQVITQGTSLK              | K | N | 1,345.77 |
| 4875 | STIP1 Stress-induced-phosphoprotein 1                                                     | IP100013894,IP100871856                                                 | 62,624.10  | 352 | 364 | LAYINPDLALEEK              | R | N | 1,488.79 |
| 4876 | DDX3X ATP-dependent RNA helicase DDX3X                                                    | IP100215637                                                             | 73,227.70  | 352 | 362 | MLDMGFEPQIR                | R | R | 1,352.63 |
| 4877 | JUP cDNA FLJ60424, highly similar to Junction plakoglobin                                 | IP100789324                                                             | 62,599.00  | 352 | 360 | VLDLTLAR                   | R | T | 1,029.59 |
| 4878 | HNRNPU heterogeneous nuclear ribonucleoprotein U isoform a                                | IP100644079                                                             | 90,567.20  | 353 | 360 | DIDIHEVR                   | K | I | 996.511  |
| 4879 | CAMK2D Isoform Delta 6 of Calcium/calmodulin-dependent protein kinase type II delta chain | IP100172636,IP100430291,IP100827573,IP100827625,IP100876923             | 54,111.10  | 353 | 371 | VTEQLIEAINNGDFEAYTK        | K | I | 2,155.06 |
| 4880 | HNRNPA1 Isoform A1-B of Heterogeneous nuclear ribonucleoprotein A1                        | IP100215965,IP100465365                                                 | 38,828.10  | 353 | 370 | NQGGYGGSSSSSSSYGSGR        | R | R | 1,694.70 |
| 4881 | TUBA1A Tubulin alpha-1A chain                                                             | IP100180675                                                             | 50,117.70  | 353 | 370 | VGINYQPPTVPPGGDLAK         | K | V | 1,824.99 |
| 4882 | TUBA1A Tubulin alpha-1A chain                                                             | IP100180675                                                             | 50,117.70  | 353 | 370 | VGINYQPPTVPPGGDLAK         | K | V | 1,824.99 |
| 4883 | TUBA1A Tubulin alpha-1A chain                                                             | IP100180675                                                             | 50,117.70  | 353 | 370 | VGINYQPPTVPPGGDLAK         | K | V | 1,824.99 |
| 4884 | TUBA1A Tubulin alpha-1A chain                                                             | IP100180675                                                             | 50,117.70  | 353 | 370 | VGINYQPPTVPPGGDLAK         | K | V | 1,824.99 |
| 4885 | TUBA1C Tubulin alpha-1C chain                                                             | IP100218343                                                             | 49,877.40  | 353 | 370 | VGINYQPPTVPPGGDLAK         | K | V | 1,824.99 |
| 4886 | TUBA1B Tubulin alpha-1B chain                                                             | IP100387144,IP100792677                                                 | 50,133.70  | 353 | 370 | VGINYQPPTVPPGGDLAK         | K | V | 1,824.99 |
| 4887 | TUBA1B Tubulin alpha-1B chain                                                             | IP100387144,IP100792677                                                 | 50,133.70  | 353 | 370 | VGINYQPPTVPPGGDLAK         | K | V | 1,824.99 |
| 4888 | SH3GLB1 Isoform 1 of Endophilin-B1                                                        | IP100006558                                                             | 40,780.00  | 354 | 365 | GKVPITYLELLN               | K | - | 1,359.79 |
| 4889 | PSMD4 Isoform Rpn10A of 26S proteasome non-ATPase regulatory subunit 4                    | IP100022694                                                             | 40,719.20  | 354 | 365 | NAMGSLASQATK               | R | D | 1,194.58 |
| 4890 | DDX39 cDNA FLJ55484, highly similar to ATP-dependent RNA helicase DDX39                   | IP100641829,IP100644431,IP100848161                                     | 50,662.10  | 354 | 364 | RILVATNLFGR                | R | G | 1,259.76 |
| 4891 | DNM1L Isoform 5 of Dynamin-1-like protein                                                 | IP100037283,IP100146935,IP100235412,IP100473085,IP100555883,IP100871742 | 79,093.20  | 354 | 365 | YIETSELGGAR                | K | I | 1,355.63 |
| 4892 | DNM1L Isoform 5 of Dynamin-1-like protein                                                 | IP100037283,IP100146935,IP100235412,IP100473085,IP100555883,IP100871742 | 79,093.20  | 354 | 365 | YIETSELGGAR                | K | I | 1,355.63 |
| 4893 | ST13 Hsc70-interacting protein                                                            | IP100032826                                                             | 41,314.40  | 354 | 360 | VMNLISK                    | K | L | 804.4648 |
| 4894 | PFKP 6-phosphofructokinase type C                                                         | IP100009790                                                             | 85,579.40  | 355 | 369 | LPLMECVQMTQDVQK            | R | A | 1,819.88 |
| 4895 | DDX39 cDNA FLJ55484, highly similar to ATP-dependent RNA helicase DDX39                   | IP100641829,IP100644431,IP100848161                                     | 50,662.10  | 355 | 364 | ILVATNLFGR                 | R | G | 1,103.66 |
| 4896 | HNRNPA3 Isoform 1 of Heterogeneous nuclear ribonucleoprotein A3                           | IP100419373                                                             | 39,577.10  | 355 | 376 | SSGSPYGGGYGSGGGSGGY        | R | R | 1,910.79 |
| 4897 | HNRNPA3 Isoform 1 of Heterogeneous nuclear ribonucleoprotein A3                           | IP100419373                                                             | 39,577.10  | 355 | 376 | GSR<br>SSGSPYGGGYGSGGGSGGY | R | R | 1,910.79 |
| 4898 | KEAP1 Kelch-like ECH-associated protein 1                                                 | IP100106502,IP100642319                                                 | 69,646.70  | 355 | 362 | LADLQVPR                   | R | S | 911.531  |
| 4899 | CSE1L Isoform 1 of Exportin-2                                                             | IP100022744,IP100219994                                                 | 110,403.90 | 356 | 372 | AADEEAFEDNSEEYIRR          | R | D | 2,043.89 |
| 4900 | IRGQ Immunity-related GTPase family Q protein                                             | IP100103925                                                             | 62,700.50  | 356 | 368 | NAGGGGLENALSK              | K | G | 1,187.60 |
| 4901 | AP3M1 AP-3 complex subunit mu-1                                                           | IP100032459                                                             | 46,922.00  | 356 | 378 | GLVNLQSGAPKPEENPSLNIQ      | K | I | 2,480.31 |
| 4902 | PA2G4 Proliferation-associated protein 2G4                                                | IP100299000,IP100794875                                                 | 43,768.70  | 356 | 364 | FK<br>ALLQSSASR            | K | K | 932.5159 |

|      |                                                                                   |                                                             |            |     |     |                                         |   |   |          |
|------|-----------------------------------------------------------------------------------|-------------------------------------------------------------|------------|-----|-----|-----------------------------------------|---|---|----------|
| 4903 | HNRNPH1 Heterogeneous nuclear ribonucleoprotein H                                 | IPI00013881,IPI00479191                                     | 49,211.80  | 356 | 375 | YVELFLNSTAGASGGAYEHR                    | R | Y | 2,142.03 |
| 4904 | KPNA1 Importin subunit alpha-1                                                    | IPI00303292                                                 | 60,232.00  | 357 | 370 | EACWTISNITAGNR                          | K | A | 1,592.75 |
| 4905 | PABPC1 Isoform 1 of Polyadenylate-binding protein 1                               | IPI00008524                                                 | 70,653.30  | 357 | 370 | IVATKPLYVALAQR                          | R | K | 1,542.94 |
| 4906 | PABPC1 Isoform 1 of Polyadenylate-binding protein 1                               | IPI00008524                                                 | 70,653.30  | 357 | 370 | IVATKPLYVALAQR                          | R | K | 1,542.94 |
| 4907 | PABPC4 Isoform 1 of Polyadenylate-binding protein 4                               | IPI00012726,IPI00555747,IPI00642904,IPI00642944             | 70,765.80  | 357 | 370 | IVGSKPLYVALAQR                          | R | K | 1,514.91 |
| 4908 | PDXDC1 Isoform 1 of Pyridoxal-dependent decarboxylase domain-containing protein 1 | IPI00384689,IPI00645809                                     | 86,690.10  | 357 | 366 | IKHACQLSQR                              | R | L | 1,240.66 |
| 4909 | LAP3 Isoform 1 of Cytosol aminopeptidase                                          | IPI00419237,IPI00789806                                     | 56,149.70  | 357 | 368 | TIQVDNTDAEGR                            | K | L | 1,318.62 |
| 4910 | RCC1 regulator of chromosome condensation 1 isoform a                             | IPI00001661,IPI00747309,IPI00787306                         | 48,126.30  | 357 | 366 | LGLGEGAE EK                             | R | S | 1,002.51 |
| 4911 | GLUL Glutamine synthetase                                                         | IPI00010130                                                 | 42,046.90  | 358 | 373 | TCLLNETGDEPFQYKN                        | R | - | 1,928.87 |
| 4912 | CCT7 T-complex protein 1 subunit eta                                              | IPI00018465                                                 | 59,349.80  | 358 | 366 | YNFFTGPCPK                              | R | A | 1,133.51 |
| 4913 | PSMD2 26S proteasome non-ATPase regulatory subunit 2                              | IPI00012268                                                 | 100,184.20 | 358 | 369 | FGGSGSQVDSAR                            | R | M | 1,167.54 |
| 4914 | SEN3 Sentrin-specific protease 3                                                  | IPI00171525                                                 | 64,992.70  | 358 | 369 | GLVLQLIQSYQR                            | K | M | 1,417.82 |
| 4915 | ZC3H14 Isoform 1 of Zinc finger CCCH domain-containing protein 14                 | IPI00397376,IPI00426049,IPI00890689,IPI00890821,IPI00903256 | 82,858.10  | 358 | 368 | AISEAQESVTK                             | K | T | 1,162.60 |
| 4916 | ABCF1 Isoform 2 of ATP-binding cassette sub-family F member 1                     | IPI00013495,IPI00873899                                     | 91,664.60  | 358 | 376 | RLQGQLEQGDDTAAERLEK                     | R | V | 2,157.09 |
| 4917 | CKB Creatine kinase B-type                                                        | IPI00022977                                                 | 42,627.10  | 359 | 381 | LLIEMEQRLEQQAIDDLMPA<br>QK              | K | - | 2,701.35 |
| 4918 | FKBP4 FK506-binding protein 4                                                     | IPI00219005                                                 | 51,787.90  | 359 | 373 | RGEAHLAVNDFELAR                         | R | A | 1,697.87 |
| 4919 | PES1 Isoform 1 of Pescadillo homolog 1                                            | IPI00003768,IPI00554461,IPI00878536                         | 67,986.90  | 359 | 372 | SLCIGATYDVTD SR                         | K | I | 1,557.72 |
| 4920 | RRM2 Ribonucleoside-diphosphate reductase M2 subunit                              | IPI00011118                                                 | 51,076.50  | 359 | 371 | IEQEFLTEALPVK                           | R | L | 1,516.83 |
| 4921 | HNRNPL Heterogeneous nuclear ribonucleoprotein L                                  | IPI00027834                                                 | 64,114.80  | 359 | 393 | YGPQYGHPPPPPPPEYGP H<br>ADSPVLMVYGLDQSK | R | M | 3,784.81 |
| 4922 | ENO1 Isoform alpha-enolase of Alpha-enolase                                       | IPI00465248                                                 | 47,152.20  | 359 | 372 | LAQANGWGVMSHR                           | K | S | 1,525.77 |
| 4923 | KPNA6 cDNA FLJ53229, highly similar to Importin alpha-7 subunit                   | IPI00747764                                                 | 60,563.50  | 360 | 373 | EACWTISNITAGNR                          | K | A | 1,592.75 |
| 4924 | PRPF6 Pre-mRNA-processing factor 6                                                | IPI00305068                                                 | 106,909.70 | 360 | 367 | AVVAQAVR                                | K | H | 813.494  |
| 4925 | SAAL1 Similar to Protein SAAL1. Isoform 2                                         | IPI00304935                                                 | 53,637.60  | 360 | 369 | VLQNMEQCQK                              | R | K | 1,277.60 |
| 4926 | ATP1A1 Isoform Long of Sodium/potassium-transporting ATPase subunit alpha-1       | IPI00006482,IPI00646182                                     | 112,881.50 | 360 | 385 | NLEAVETLSTSTICS DKTGTL<br>TQNR          | K | M | 2,796.37 |
| 4927 | NUP43 cDNA FLJ38675 fis, clone IMR322000243, highly similar to Nucleoporin Nup43  | IPI00171664,IPI00742943                                     | 48,466.40  | 360 | 368 | SSLFHQGG R                              | K | S | 988.4959 |
| 4928 | HSPH1 Isoform Beta of Heat shock protein 105 kDa                                  | IPI00218993,IPI00513743                                     | 92,099.00  | 361 | 374 | DISTTLNADEAVAR                          | K | G | 1,475.73 |
| 4929 | HSPA4L Heat shock 70 kDa protein 4L                                               | IPI00295485,IPI00828021                                     | 94,470.40  | 361 | 374 | DISTTLNADEAVAR                          | K | G | 1,475.73 |
| 4930 | HSPA4 Heat shock 70 kDa protein 4                                                 | IPI00002966                                                 | 94,313.90  | 361 | 374 | ELSTTLNADEAVTR                          | K | G | 1,519.76 |
| 4931 | CTPS CTP synthase 1                                                               | IPI00290142                                                 | 66,672.70  | 361 | 376 | LCSAHGVLPGGFGVR                         | K | G | 1,625.86 |
| 4932 | TOP2A Isoform 3 of DNA topoisomerase 2-alpha                                      | IPI00218753,IPI00414101,IPI00478232,IPI00879004             | 178,700.70 | 361 | 372 | HVDYVADQIVTK                            | R | L | 1,387.72 |
| 4933 | MSN Moesin                                                                        | IPI00219365,IPI00872814                                     | 67,803.80  | 361 | 370 | AQQELEEQTR                              | K | R | 1,231.59 |
| 4934 | MCCC1 Methylcrotonoyl-CoA carboxylase subunit alpha, mitochondrial                | IPI00024580,IPI00792499                                     | 80,455.60  | 362 | 385 | IAAGEKIPLSQEITLQGHAF E<br>AR            | R | I | 2,608.37 |
| 4935 | ACAT2 Acetyl-CoA acetyltransferase, cytosolic                                     | IPI00291419                                                 | 41,332.40  | 362 | 372 | ILVTL LHTLER                            | R | M | 1,307.80 |
| 4936 | ACAT2 Acetyl-CoA acetyltransferase, cytosolic                                     | IPI00291419                                                 | 41,332.40  | 362 | 372 | ILVTL LHTLER                            | R | M | 1,307.80 |
| 4937 | ACTR1A Alpha-centractin                                                           | IPI00029468,IPI00908883                                     | 42,597.20  | 362 | 369 | EYEEDGAR                                | K | S | 968.3956 |
| 4938 | KIAA1279 KIF1-binding protein                                                     | IPI00477355                                                 | 71,797.70  | 362 | 380 | AVQFGT GELCDAISAVEEK                    | K | V | 2,023.96 |
| 4939 | BZW2 Basic leucine zipper and W2 domain-containing protein 2                      | IPI00022305,IPI00894416                                     | 48,146.00  | 363 | 369 | IVVLFYK                                 | K | A | 881.5495 |
| 4940 | SRP54 Signal recognition particle 54 kDa protein                                  | IPI00009822                                                 | 55,688.30  | 363 | 371 | GNEQESMAR                               | K | L | 1,021.44 |
| 4941 | RUVBL1 Isoform 1 of RuvB-like 1                                                   | IPI00021187                                                 | 50,211.40  | 363 | 372 | TMLYTPQEMK                              | R | Q | 1,273.58 |
| 4942 | ZNF207 Isoform 1 of Zinc finger protein 207                                       | IPI00013457,IPI00219759,IPI00219760,IPI00788670,IPI00792837 | 50,733.10  | 363 | 375 | LIHPDEDISLEER                           | K | R | 1,565.78 |

|      |                                                                                                  |                                                             |            |     |     |                       |   |   |          |
|------|--------------------------------------------------------------------------------------------------|-------------------------------------------------------------|------------|-----|-----|-----------------------|---|---|----------|
| 4943 | - cDNA FLJ55764, highly similar to Apolipoprotein-L2                                             | IP100220007,IP100877964                                     | 49,748.50  | 363 | 373 | ISAEGGEQVER           | R | V | 1,174.57 |
| 4944 | PFKM cDNA FLJ44241 fis, clone THYMU3008436, highly similar to 6-phosphofructokinase, muscle type | IP100465179,IP100743142                                     | 93,203.30  | 364 | 372 | VTVLGHVQR             | R | G | 1,008.59 |
| 4945 | PRC1 Isoform 1 of Protein regulator of cytokinesis 1                                             | IP100022629,IP100399304,IP100748507,IP100871281,IP100915034 | 71,589.90  | 364 | 370 | LFLEFER               | R | K | 953.5091 |
| 4946 | NONO Non-POU domain-containing octamer-binding protein                                           | IP100304596                                                 | 54,213.60  | 365 | 378 | RQQEGFKGTFPDAR        | R | E | 1,636.82 |
| 4947 | ANAPC7 anaphase-promoting complex subunit 7                                                      | IP100008248,IP100915282                                     | 66,839.70  | 365 | 379 | AIQLNSNSVQALLLK       | K | G | 1,611.94 |
| 4948 | ANAPC7 anaphase-promoting complex subunit 7                                                      | IP100008248,IP100915282                                     | 66,839.70  | 365 | 379 | AIQLNSNSVQALLLK       | K | G | 1,611.94 |
| 4949 | STIP1 Stress-induced-phosphoprotein 1                                                            | IP100013894,IP100871856                                     | 62,624.10  | 365 | 381 | NKGNECFQKGDYPQAMK     | K | H | 2,014.91 |
| 4950 | ATP6V1A V-type proton ATPase catalytic subunit A                                                 | IP100007682                                                 | 68,287.40  | 365 | 381 | LAEMPADSGYPAYLGAR     | R | L | 1,781.85 |
| 4951 | PREPL Isoform 1 of Prolyl endopeptidase-like                                                     | IP100442171,IP100880064                                     | 83,911.80  | 365 | 382 | HSNLLYVNVIGLADDSVR    | K | S | 1,985.05 |
| 4952 | TRIM28 Isoform 1 of Transcription intermediary factor 1-beta                                     | IP100438229,IP100438230                                     | 88,531.00  | 366 | 374 | KLIYFQLHR             | K | A | 1,217.72 |
| 4953 | G3BP2 Isoform A of Ras GTPase-activating protein-binding protein 2                               | IP100009057,IP100179890                                     | 54,102.30  | 366 | 387 | GVGGKLPNFGFVFFDDSEPV  | K | I | 2,364.20 |
| 4954 | CCDC99 Isoform 1 of Coiled-coil domain-containing protein 99                                     | IP100030845,IP100061356                                     | 58,945.50  | 366 | 380 | DACVNNSALGGEVYR       | K | L | 1,624.74 |
| 4955 | SFPQ Isoform Long of Splicing factor, proline- and glutamine-rich                                | IP100010740                                                 | 76,131.50  | 366 | 376 | FATHAAALSVR           | R | N | 1,143.63 |
| 4956 | DDX52 Probable ATP-dependent RNA helicase                                                        | IP100032423                                                 | 67,450.30  | 366 | 379 | LNLDNVISVIGAR         | K | N | 1,470.83 |
| 4957 | ABCF2 ATP-binding cassette sub-family F member 2                                                 | IP100005045,IP100068506                                     | 71,274.50  | 366 | 374 | MMASGLTER             | K | V | 1,027.45 |
| 4958 | PGK1 Phosphoglycerate kinase 1                                                                   | IP100169383                                                 | 44,597.30  | 366 | 382 | GCITIIGGGDTATCCAK     | R | W | 1,754.79 |
| 4959 | CKB Creatine kinase B-type                                                                       | IP100022977                                                 | 42,627.10  | 367 | 381 | LEQQQAIDDLMPAQK       | R | - | 1,672.82 |
| 4960 | PSMC2 26S protease regulatory subunit 7                                                          | IP100021435                                                 | 48,617.60  | 367 | 375 | DIRFELLAR             | R | L | 1,132.65 |
| 4961 | COPB1 Coatomer subunit beta                                                                      | IP100295851                                                 | 107,128.00 | 367 | 380 | TNNVSEHEDTDKYR        | K | Q | 1,707.76 |
| 4962 | EEF2 Elongation factor 2                                                                         | IP100186290                                                 | 95,322.10  | 367 | 386 | YRCELLYEGPPDDEAAMGIK  | K | S | 2,343.06 |
| 4963 | TARS Threonyl-tRNA synthetase, cytoplasmic                                                       | IP100329633,IP100908949                                     | 83,419.80  | 368 | 381 | GFQEVVTPNIFNSR        | R | L | 1,607.82 |
| 4964 | OSBPL11 Oxysterol-binding protein-related protein 11                                             | IP100032970,IP100789006                                     | 83,625.30  | 368 | 378 | SVILHLLSQLK           | R | L | 1,250.78 |
| 4965 | DIS3 Isoform 2 of Exosome complex exonuclease RRP44                                              | IP100183462,IP100746351                                     | 105,025.50 | 368 | 377 | IIVADGWPR             | R | N | 1,139.66 |
| 4966 | JUP Junction plakoglobin                                                                         | IP100554711                                                 | 81,727.90  | 368 | 377 | LVQNCLWTLR            | R | N | 1,302.70 |
| 4967 | - cDNA FLJ54408, highly similar to Heat shock 70 kDa protein 1                                   | IP100911039                                                 | 63,907.90  | 369 | 392 | QTQIFTTYSDNQPGVLIQVYE | K | A | 2,786.36 |
| 4968 | PSAT1 cDNA FLJ56437, highly similar to Phosphoserine aminotransferase                            | IP100001734                                                 | 45,338.10  | 369 | 378 | ALELNMLSLK            | K | G | 1,147.64 |
| 4969 | CCT7 T-complex protein 1 subunit eta                                                             | IP100018465                                                 | 59,349.80  | 369 | 375 | TCTFILR               | K | G | 910.4816 |
| 4970 | UBA1 Ubiquitin-like modifier-activating enzyme 1                                                 | IP100645078                                                 | 117,832.30 | 369 | 384 | ALPAVQQNNLDEDLIR      | R | K | 1,808.95 |
| 4971 | TRIP13 Isoform 1 of Thyroid receptor-interacting protein 13                                      | IP100003505                                                 | 48,534.10  | 369 | 378 | LSLLLNDISR            | K | K | 1,143.67 |
| 4972 | - cDNA FLJ54554, highly similar to Pyruvate kinase isozymes M1/M2                                | IP100910979                                                 | 56,255.30  | 369 | 385 | EAEAAIYHLQLFEELRR     | R | L | 2,088.09 |
| 4973 | EEF2 Elongation factor 2                                                                         | IP100186290                                                 | 95,322.10  | 369 | 386 | CELLYEGPPDDEAAMGIK    | R | S | 2,023.90 |
| 4974 | GHDC Isoform 1 of GH3 domain-containing protein                                                  | IP100427501,IP100427502,IP100909449                         | 57,505.60  | 370 | 381 | VVGAYNQCPVVR          | R | F | 1,361.70 |
| 4975 | EIF4A2 Isoform 1 of Eukaryotic initiation factor 4A-II                                           | IP100328328,IP100409717                                     | 46,385.60  | 370 | 383 | KGVAINFVTEEDKR        | R | I | 1,605.86 |
| 4976 | SAAL1 Similar to Protein SAAL1. Isoform 2                                                        | IP100304935                                                 | 53,637.60  | 370 | 384 | KPENSAESNTEETKR       | K | T | 1,719.81 |
| 4977 | BZW2 Basic leucine zipper and W2 domain-containing protein 2                                     | IP100022305,IP100894416                                     | 48,146.00  | 370 | 380 | ADVLSEEAILK           | K | W | 1,187.65 |
| 4978 | LRRC47 Leucine-rich repeat-containing protein 47                                                 | IP100170935                                                 | 63,456.70  | 371 | 381 | TAATLATHLR            | R | A | 1,183.64 |
| 4979 | SSRP1 FACT complex subunit SSRP1                                                                 | IP100005154                                                 | 81,059.60  | 371 | 381 | FDEISFVNFR            | R | G | 1,344.66 |
| 4980 | NCL Nucleolin                                                                                    | IP100604620                                                 | 76,597.90  | 371 | 382 | VFGNEIKLEKPK          | K | G | 1,401.81 |
| 4981 | MTHFD1 C-1-tetrahydrofolate synthase, cytoplasmic                                                | IP100218342,IP100794900                                     | 101,543.50 | 371 | 386 | YVVVTGITPTPLGEGK      | K | S | 1,630.91 |

|      |                                                                          |                                     |            |     |     |                            |   |   |          |
|------|--------------------------------------------------------------------------|-------------------------------------|------------|-----|-----|----------------------------|---|---|----------|
| 4982 | IMMT Isoform 1 of Mitochondrial inner membrane protein                   | IPI00009960,IPI00470829,IPI00554469 | 83,661.00  | 372 | 385 | ELDSITPEVLPGWK             | R | G | 1,583.83 |
| 4983 | DHX15 Putative pre-mRNA-splicing factor ATP-dependent RNA helicase DHX15 | IPI00396435                         | 90,917.20  | 372 | 384 | EVDDLGPVEVDIK              | R | I | 1,385.68 |
| 4984 | ILF3 Isoform 1 of Interleukin enhancer-binding factor 3                  | IPI00298788                         | 95,320.90  | 372 | 385 | RPMEEDGEEKSPSK             | K | K | 1,618.74 |
| 4985 | DDX42 Isoform 1 of ATP-dependent RNA helicase DDX42                      | IPI00409671,IPI00829889             | 102,958.90 | 372 | 386 | ALQEGAEIVVCTPGR            | K | L | 1,599.82 |
| 4986 | HNRNPM Isoform 1 of Heterogeneous nuclear ribonucleoprotein M            | IPI00171903,IPI00383296             | 77,499.30  | 372 | 381 | INEILSNALK                 | R | R | 1,114.65 |
| 4987 | PSMD6 26S proteasome non-ATPase regulatory subunit 6                     | IPI00014151                         | 45,515.40  | 372 | 379 | KGDLLLR                    | K | V | 928.5576 |
| 4988 | DPYSL5 Dihydropyrimidinase-related protein 5                             | IPI00335509                         | 61,402.90  | 373 | 383 | FVAVTSSNAAK                | R | L | 1,094.58 |
| 4989 | CSE1L Isoform 1 of Exportin-2                                            | IPI00022744,IPI00219994             | 110,403.90 | 373 | 382 | DLEGSIDIOTR                | R | R | 1,120.51 |
| 4990 | CTNBL1 Isoform 1 of Beta-catenin-like protein 1                          | IPI00844214                         | 65,157.20  | 373 | 380 | FVDILGLR                   | K | T | 932.5565 |
| 4991 | EIF2B3 Isoform 1 of Translation initiation factor eIF-2B subunit gamma   | IPI00006504                         | 50,223.30  | 373 | 384 | SVIGSSCLIKDR               | R | V | 1,334.71 |
| 4992 | OLA1 Isoform 1 of Obg-like ATPase 1                                      | IPI00290416,IPI00916847             | 44,727.40  | 374 | 386 | NYIVEDGDIIFFK              | R | F | 1,572.79 |
| 4993 | FASN Fatty acid synthase                                                 | IPI00026781                         | 273,382.00 | 374 | 384 | LQVVDQPLPVR                | R | G | 1,263.74 |
| 4994 | FASN Fatty acid synthase                                                 | IPI00026781                         | 273,382.00 | 374 | 384 | LQVVDQPLPVR                | R | G | 1,263.74 |
| 4995 | MYH9 Isoform 1 of Myosin-9                                               | IPI00019502,IPI00395772             | 226,519.50 | 374 | 387 | VSHLLGINVTDFTFR            | K | G | 1,571.85 |
| 4996 | - cDNA FLJ55764, highly similar to Apolipoprotein-L2                     | IPI00220007,IPI00877964             | 49,748.50  | 374 | 384 | VVEGPAQAMSR                | R | G | 1,144.58 |
| 4997 | PREP Prolyl endopeptidase                                                | IPI00008164                         | 80,683.50  | 374 | 389 | TFPLDVGSIYGSGQK            | K | K | 1,667.86 |
| 4998 | TUBA1A Tubulin alpha-1A chain                                            | IPI00180675                         | 50,117.70  | 374 | 390 | AVCMLSNTTAIAEAWAR          | R | L | 1,864.90 |
| 4999 | TUBA1B Tubulin alpha-1B chain                                            | IPI00387144,IPI00792677             | 50,133.70  | 374 | 390 | AVCMLSNTTAIAEAWAR          | R | L | 1,864.90 |
| 5000 | TUBA1C Tubulin alpha-1C chain                                            | IPI00218343                         | 49,877.40  | 374 | 390 | AVCMLSNTTAVAEAWAR          | R | L | 1,866.88 |
| 5001 | UGDH UDP-glucose 6-dehydrogenase                                         | IPI000031420                        | 55,007.30  | 374 | 393 | EQIVVDLSHPGVSEDDQVSR       | R | L | 2,209.07 |
| 5002 | SRPR Signal recognition particle receptor subunit alpha                  | IPI00385267                         | 69,794.80  | 374 | 386 | VMGTFTVTSTVK               | K | Q | 1,373.70 |
| 5003 | RCC1 regulator of chromosome condensation 1 isoform a                    | IPI00001661,IPI00747309,IPI00787306 | 48,126.30  | 375 | 393 | LPAVSSVACGASVGYAVTK        | R | D | 1,836.95 |
| 5004 | GATA6 Isoform 1 of Transcription factor GATA-6                           | IPI00024236,IPI00915001             | 60,015.00  | 375 | 388 | GPSADLLEDLSESR             | R | E | 1,488.72 |
| 5005 | PSMD3 26S proteasome non-ATPase regulatory subunit 3                     | IPI00011603                         | 60,961.60  | 375 | 385 | FNQVLDQFGEK                | K | F | 1,324.65 |
| 5006 | DNAJA1 DnaJ homolog subfamily A member 1                                 | IPI00012535                         | 44,850.60  | 375 | 389 | HYNGEAYEDDEHPR             | R | G | 1,868.76 |
| 5007 | TFRC Transferrin receptor protein 1                                      | IPI00022462                         | 84,855.60  | 375 | 385 | LTVSNVLKEIK                | K | I | 1,243.76 |
| 5008 | PABPC1 Isoform 1 of Polyadenylate-binding protein 1                      | IPI00008524                         | 70,653.30  | 375 | 385 | QAHLTNQYMQR                | R | M | 1,405.66 |
| 5009 | HSPA4 Heat shock 70 kDa protein 4                                        | IPI00002966                         | 94,313.90  | 375 | 388 | GCALQCAILSPAFAK            | R | V | 1,535.77 |
| 5010 | HSPH1 Isoform Beta of Heat shock protein 105 kDa                         | IPI00218993,IPI00513743             | 92,099.00  | 375 | 388 | GCALQCAILSPAFAK            | R | V | 1,535.77 |
| 5011 | HSPA4L Heat shock 70 kDa protein 4L                                      | IPI00295485,IPI00828021             | 94,470.40  | 375 | 388 | GCALQCAILSPAFAK            | R | V | 1,535.77 |
| 5012 | GNL3L Guanine nucleotide-binding protein-like 3-like protein             | IPI00005132,IPI00871959             | 65,555.30  | 376 | 386 | GGLYSQEQAQK                | K | A | 1,151.57 |
| 5013 | CORO1C Coronin-1C_i3 protein                                             | IPI00867509                         | 58,930.80  | 376 | 387 | RGLDVNKCEIAR               | K | F | 1,430.75 |
| 5014 | HNRNPR heterogeneous nuclear ribonucleoprotein R isoform 1               | IPI00644055                         | 71,197.20  | 376 | 387 | LKDYAFVHFEDR               | K | G | 1,539.76 |
| 5015 | CCT7 T-complex protein 1 subunit eta                                     | IPI00018465                         | 59,349.80  | 376 | 387 | GGAEQFMEETER               | R | S | 1,383.58 |
| 5016 | CCT7 T-complex protein 1 subunit eta                                     | IPI00018465                         | 59,349.80  | 376 | 387 | GGAEQFMEETER               | R | S | 1,399.58 |
| 5017 | PA2G4 Proliferation-associated protein 2G4                               | IPI00299000,IPI00794875             | 43,768.70  | 377 | 394 | TAENATSGETLEENEAGD         | K | - | 1,837.76 |
| 5018 | MARS Methionyl-tRNA synthetase, cytoplasmic                              | IPI00008240                         | 101,099.50 | 377 | 388 | GFVLQDQVQLR                | R | C | 1,404.75 |
| 5019 | PLS3 plastin 3                                                           | IPI00216694                         | 70,795.90  | 377 | 398 | YPALTKPENQDIDWTLLEGET<br>R | K | E | 2,589.28 |
| 5020 | CCT3 chaperonin containing TCP1, subunit 3 isoform b                     | IPI00290770,IPI00553185             | 60,446.30  | 377 | 388 | GASKEILSEVER               | R | N | 1,317.70 |
| 5021 | CCT3 chaperonin containing TCP1, subunit 3 isoform b                     | IPI00290770,IPI00553185             | 60,446.30  | 377 | 388 | GASKEILSEVER               | R | N | 1,317.70 |

|      |                                                                         |                                                 |            |     |     |                            |   |   |          |
|------|-------------------------------------------------------------------------|-------------------------------------------------|------------|-----|-----|----------------------------|---|---|----------|
| 5022 | RUVBL1 Isoform 1 of RuvB-like 1                                         | IPI00021187                                     | 50,211.40  | 377 | 400 | IRAQTEGINISEEALNHLGEIG TK  | K | T | 2,593.36 |
| 5023 | PLS3 plastin 3                                                          | IPI00216694                                     | 70,795.90  | 377 | 401 | YPALTKPENQDIDWTLLEGET REER | K | T | 3,003.47 |
| 5024 | HNRNPK Isoform 1 of Heterogeneous nuclear ribonucleoprotein K           | IPI00216049,IPI00216746,IPI00807545,IPI00910458 | 50,960.50  | 378 | 396 | GSYGDLLGGPIITQVTIPK        | R | D | 1,917.03 |
| 5025 | RCC2 Protein RCC2                                                       | IPI00465044                                     | 56,066.80  | 378 | 384 | LFDFPGR                    | K | G | 851.4411 |
| 5026 | DGCR14 Protein DGCR14                                                   | IPI00165171                                     | 52,550.80  | 378 | 388 | VTENLASLTPK                | R | G | 1,172.65 |
| 5027 | ILKAP Integrin-linked kinase-associated serine/threonine phosphatase 2C | IPI00006164                                     | 42,889.20  | 378 | 389 | GSADNVTVMVVR               | R | I | 1,263.64 |
| 5028 | EHD1 EH domain-containing protein 1                                     | IPI00017184                                     | 60,611.10  | 378 | 392 | LLDVTDDMLANDIAR            | K | L | 1,674.84 |
| 5029 | UHRF1 ubiquitin-like with PHD and ring finger domains 1 isoform 2       | IPI00797279,IPI00797945                         | 91,082.30  | 378 | 389 | NDASEVVLAGER               | R | L | 1,259.62 |
| 5030 | RARS Isoform Complexed of Arginyl-tRNA synthetase. cytoplasmic          | IPI00004860                                     | 75,364.00  | 378 | 393 | SDGGYTYDTSDLAAIK           | K | Q | 1,676.77 |
| 5031 | PRPF6 Pre-mRNA-processing factor 6                                      | IPI00305068                                     | 106,909.70 | 379 | 387 | AAELETDIR                  | R | A | 1,017.52 |
| 5032 | FKBP4 FK506-binding protein 4                                           | IPI00219005                                     | 51,787.90  | 379 | 387 | VLQLYPNNK                  | K | A | 1,088.61 |
| 5033 | HSP90AB1 Heat shock protein HSP 90-beta                                 | IPI00414676                                     | 83,249.30  | 379 | 392 | GVVDEDLPLNISR              | R | E | 1,513.79 |
| 5034 | HSP90AB1 Heat shock protein HSP 90-beta                                 | IPI00414676                                     | 83,249.30  | 379 | 392 | GVVDEDLPLNISR              | R | E | 1,513.79 |
| 5035 | HSP90AB1 Heat shock protein HSP 90-beta                                 | IPI00414676                                     | 83,249.30  | 379 | 392 | GVVDEDLPLNISR              | R | E | 1,513.79 |
| 5036 | HSP90AB1 Heat shock protein HSP 90-beta                                 | IPI00414676                                     | 83,249.30  | 379 | 392 | GVVDEDLPLNISR              | R | E | 1,513.79 |
| 5037 | SRPK1 Isoform 2 of Serine/threonine-protein kinase SRPK1                | IPI00412344                                     | 92,430.40  | 379 | 399 | IIHTDIKPENILLSVNEQYIR      | R | R | 2,508.38 |
| 5038 | TCP1 T-complex protein 1 subunit alpha                                  | IPI00290566                                     | 60,327.20  | 379 | 390 | GANDFMCDEMER               | R | S | 1,506.53 |
| 5039 | RUVBL1 Isoform 1 of RuvB-like 1                                         | IPI00021187                                     | 50,211.40  | 379 | 400 | AQTEGINISEEALNHLGEIGTK     | R | T | 2,324.17 |
| 5040 | AP3M1 AP-3 complex subunit mu-1                                         | IPI00032459                                     | 46,922.00  | 379 | 388 | IQQLAISGLK                 | K | V | 1,070.66 |
| 5041 | FSCN1 Fascin                                                            | IPI00163187,IPI00747810                         | 54,512.30  | 380 | 389 | LINRPIIVFR                 | K | G | 1,240.79 |
| 5042 | GMPPA Isoform 1 of Mannose-1-phosphate quanyltransferase alpha          | IPI00101782,IPI00657888                         | 46,273.80  | 380 | 390 | LLPAITILGCR                | K | V | 1,226.73 |
| 5043 | EHD4 EH domain-containing protein 4                                     | IPI00005578                                     | 61,159.60  | 381 | 392 | LIEAVDNMLSNK               | K | I | 1,362.69 |
| 5044 | CCT3 chaperonin containing TCP1, subunit 3 isoform b                    | IPI00290770,IPI00553185                         | 60,446.30  | 381 | 388 | EILSEVER                   | K | N | 974.5153 |
| 5045 | CCT3 chaperonin containing TCP1, subunit 3 isoform b                    | IPI00290770,IPI00553185                         | 60,446.30  | 381 | 388 | EILSEVER                   | K | N | 974.5153 |
| 5046 | TUBB2C Tubulin beta-2C chain                                            | IPI00007752                                     | 49,812.70  | 381 | 390 | ISEQFTAMFR                 | R | R | 1,245.59 |
| 5047 | TUBB2C Tubulin beta-2C chain                                            | IPI00007752                                     | 49,812.70  | 381 | 390 | ISEQFTAMFR                 | R | R | 1,245.59 |
| 5048 | TUBB2C Tubulin beta-2C chain                                            | IPI00007752                                     | 49,812.70  | 381 | 390 | ISEQFTAMFR                 | R | R | 1,229.60 |
| 5049 | TUBB Tubulin beta chain                                                 | IPI00011654                                     | 49,652.60  | 381 | 390 | ISEQFTAMFR                 | R | R | 1,245.59 |
| 5050 | TUBB Tubulin beta chain                                                 | IPI00011654                                     | 49,652.60  | 381 | 390 | ISEQFTAMFR                 | R | R | 1,245.59 |
| 5051 | TUBB Tubulin beta chain                                                 | IPI00011654                                     | 49,652.60  | 381 | 390 | ISEQFTAMFR                 | R | R | 1,229.60 |
| 5052 | TUBB2A Tubulin beta-2A chain                                            | IPI00013475,IPI00031370                         | 49,889.10  | 381 | 390 | ISEQFTAMFR                 | R | R | 1,245.59 |
| 5053 | TUBB2A Tubulin beta-2A chain                                            | IPI00013475,IPI00031370                         | 49,889.10  | 381 | 390 | ISEQFTAMFR                 | R | R | 1,229.60 |
| 5054 | ATP6V1A V-type proton ATPase catalytic subunit A                        | IPI00007682                                     | 68,287.40  | 382 | 388 | LASFYER                    | R | A | 885.4464 |
| 5055 | CCT5 T-complex protein 1 subunit epsilon                                | IPI00010720,IPI00910316                         | 59,654.30  | 382 | 388 | AVTIFIR                    | R | G | 819.5087 |
| 5056 | HK2 Hexokinase-2                                                        | IPI00102864,IPI00917193                         | 102,363.30 | 382 | 396 | SASLCAATLAAVLQR            | R | I | 1,531.83 |
| 5057 | NOP56 Nucleolar protein 5A                                              | IPI00411937                                     | 66,034.00  | 382 | 396 | IDCFSEVPTSVFGEK            | R | L | 1,714.80 |
| 5058 | STIP1 Stress-induced-phosphoprotein 1                                   | IPI00013894,IPI00871856                         | 62,624.10  | 382 | 389 | HYTEAIKR                   | K | N | 1,017.55 |
| 5059 | CTPS CTP synthase 1                                                     | IPI00290142                                     | 66,672.70  | 382 | 389 | IQAIAWAR                   | K | N | 928.5363 |
| 5060 | HNRNPM Isoform 1 of Heterogeneous nuclear ribonucleoprotein M           | IPI00171903,IPI00383296                         | 77,499.30  | 382 | 388 | RGEIIAK                    | K | Q | 786.4833 |
| 5061 | CTPS2 CTP synthase 2                                                    | IPI00645702                                     | 65,661.40  | 382 | 389 | LQAISWAR                   | K | T | 944.5312 |
| 5062 | CSNK1E Casein kinase I isoform epsilon                                  | IPI00027729                                     | 47,299.00  | 383 | 396 | GAPANVSSSDLTGR             | R | Q | 1,331.66 |
| 5063 | API5 Isoform 2 of Apoptosis inhibitor 5                                 | IPI00554742,IPI00555572,IPI00855856             | 56,754.30  | 383 | 389 | GLQVYIR                    | R | Q | 848.4989 |
| 5064 | SH3GLB2 Isoform 1 of Endophilin-B2                                      | IPI00024540,IPI00398828                         | 43,957.20  | 384 | 395 | GKVPVTYLELLS               | K | - | 1,318.76 |



|      |                                                                              |                                                             |            |     |     |                               |   |   |          |
|------|------------------------------------------------------------------------------|-------------------------------------------------------------|------------|-----|-----|-------------------------------|---|---|----------|
| 5065 | CMAS Isoform 1 of N-acylneuraminat<br>cytidyltransferase                     | IPI00303158                                                 | 48,361.60  | 384 | 399 | VGLSGAPADACSTAQK              | R | A | 1,532.74 |
| 5066 | GDI2 cDNA FLJ60299, highly similar to Rab GDP<br>dissociation inhibitor beta | IPI00031461                                                 | 51,138.50  | 384 | 394 | FVSISDLLVPK                   | K | D | 1,217.71 |
| 5067 | GDI2 cDNA FLJ60299, highly similar to Rab GDP<br>dissociation inhibitor beta | IPI00031461                                                 | 51,138.50  | 384 | 394 | FVSISDLLVPK                   | K | D | 1,217.71 |
| 5068 | NONO Non-POU domain-containing octamer-<br>binding protein                   | IPI00304596                                                 | 54,213.60  | 384 | 398 | MGQMAMGGAMGINNR               | R | G | 1,570.66 |
| 5069 | FARSB Phenylalanyl-tRNA synthetase beta chain                                | IPI00300074                                                 | 66,114.60  | 384 | 395 | TYTIANQFPLNK                  | K | L | 1,409.74 |
| 5070 | RP6-213H19.1 Serine/threonine-protein kinase<br>MST4                         | IPI00292827,IPI00760722,IPI00844141,IPI00872588,IPI00911046 | 46,512.40  | 384 | 398 | SIAVAEAACPGITDK               | K | M | 1,502.75 |
| 5071 | ETF1 Eukaryotic peptide chain release factor<br>subunit 1                    | IPI00429191                                                 | 49,014.60  | 385 | 404 | FGATLEIVTDKLSQEGSQFVK         | K | G | 2,184.12 |
| 5072 | PPAT Amidophosphoribosyltransferase                                          | IPI00029534                                                 | 57,381.30  | 385 | 394 | IVLVDDSVIR                    | R | G | 1,128.66 |
| 5073 | HSP90B1 Endoplasmic                                                          | IPI00027230                                                 | 92,453.70  | 385 | 395 | SILFVPTSAPR                   | K | G | 1,187.68 |
| 5074 | KHSRP KH-type splicing regulatory protein                                    | IPI00479786,IPI00855957                                     | 73,097.60  | 385 | 394 | IINDLLQSLR                    | R | S | 1,184.70 |
| 5075 | - cDNA FLJ54554, highly similar to Pyruvate kinase<br>isozymes M1/M2         | IPI00910979                                                 | 56,255.30  | 386 | 407 | LAPITSDPTEATAVGAVEASFK        | R | C | 2,175.12 |
| 5076 | DDX24 ATP-dependent RNA helicase DDX24                                       | IPI00006987                                                 | 96,316.70  | 386 | 397 | RPLLGLVLTPTTR                 | K | E | 1,335.85 |
| 5077 | COPB1 Coatomer subunit beta                                                  | IPI00295851                                                 | 107,128.00 | 386 | 393 | TLHSCSVR                      | R | F | 959.4727 |
| 5078 | TFRC Transferrin receptor protein 1                                          | IPI00022462                                                 | 84,855.60  | 386 | 394 | ILNIFGVK                      | K | G | 1,016.65 |
| 5079 | PSMD3 26S proteasome non-ATPase regulatory<br>subunit 3                      | IPI00011603                                                 | 60,961.60  | 386 | 397 | FQADGTYTLIIR                  | K | L | 1,397.74 |
| 5080 | PFKP 6-phosphofructokinase type C                                            | IPI00009790                                                 | 85,579.40  | 386 | 395 | SFAGNLNTYK                    | R | R | 1,114.55 |
| 5081 | OSBPL11 Oxysterol-binding protein-related protein<br>11                      | IPI00032970,IPI00789006                                     | 83,625.30  | 386 | 396 | VVLPTFILEKR                   | R | S | 1,314.81 |
| 5082 | HNRNPA2B1 43 kDa protein                                                     | IPI00874030                                                 | 43,234.30  | 387 | 411 | NMGGPYGGGNYGPGGSGG<br>SGGYGGR | R | S | 2,189.91 |
| 5083 | DDX41 Probable ATP-dependent RNA helicase<br>DDX41                           | IPI00007208                                                 | 69,821.60  | 388 | 400 | SALVKPVTINVGR                 | K | A | 1,353.82 |
| 5084 | CCT7 T-complex protein 1 subunit eta                                         | IPI00018465                                                 | 59,349.80  | 388 | 398 | SLHDAIMIVRR                   | R | A | 1,326.73 |
| 5085 | G3BP2 Isoform A of Ras GTPase-activating protein-<br>binding protein 2       | IPI00009057,IPI00179890                                     | 54,102.30  | 388 | 397 | ILIAKPIMFR                    | R | G | 1,201.75 |
| 5086 | PSAT1 cDNA FLJ56437, highly similar to<br>Phosphoserine aminotransferase     | IPI00001734                                                 | 45,338.10  | 388 | 401 | ASLYNAVTIEDVQK                | R | L | 1,550.81 |
| 5087 | PSAT1 cDNA FLJ56437, highly similar to<br>Phosphoserine aminotransferase     | IPI00001734                                                 | 45,338.10  | 388 | 401 | ASLYNAVTIEDVQK                | R | L | 1,550.81 |
| 5088 | GOT1 Aspartate aminotransferase, cytoplasmic                                 | IPI00219029                                                 | 46,230.10  | 388 | 396 | INVSGLTTK                     | R | N | 932.5412 |
| 5089 | CCT7 T-complex protein 1 subunit eta                                         | IPI00018465                                                 | 59,349.80  | 388 | 397 | SLHDAIMIVR                    | R | R | 1,154.64 |
| 5090 | TRAP1 Heat shock protein 75 kDa, mitochondrial                               | IPI00030275,IPI00646055                                     | 80,094.90  | 389 | 402 | GVVSEDIPLNLSR                 | R | E | 1,513.79 |
| 5091 | DDX5 Probable ATP-dependent RNA helicase<br>DDX5                             | IPI00017617                                                 | 69,131.70  | 389 | 403 | HGKAPILIATDVASR               | K | G | 1,548.89 |
| 5092 | HARS Histidyl-tRNA synthetase, cytoplasmic                                   | IPI00021808                                                 | 57,394.40  | 389 | 396 | IFSIVEQR                      | R | L | 991.5571 |
| 5093 | AHCY Adenosylhomocysteinase                                                  | IPI00012007                                                 | 47,699.10  | 389 | 401 | KLDEAVAEAHLGK                 | K | L | 1,380.75 |
| 5094 | CCT3 chaperonin containing TCP1, subunit 3<br>isoform b                      | IPI00290770,IPI00553185                                     | 60,446.30  | 389 | 398 | NLQDAMQVCR                    | R | N | 1,250.56 |
| 5095 | CCT3 chaperonin containing TCP1, subunit 3<br>isoform b                      | IPI00290770,IPI00553185                                     | 60,446.30  | 389 | 398 | NLQDAMQVCR                    | R | N | 1,234.57 |
| 5096 | SMU1 WD40 repeat-containing protein SMU1                                     | IPI00305833                                                 | 57,526.80  | 389 | 408 | SLGSTAGTDITVNSVILLPK          | K | N | 1,986.11 |
| 5097 | RPA1 Replication protein A 70 kDa DNA-binding<br>subunit                     | IPI00020127                                                 | 68,121.00  | 390 | 412 | SLSVLSSTIIANPDPEAYKLR         | R | G | 2,474.35 |
| 5098 | ZNF148 Zinc finger protein 148                                               | IPI00010833                                                 | 88,958.40  | 390 | 394 | LVLKK                         | K | I | 600.4444 |
| 5099 | CSK Tyrosine-protein kinase CSK                                              | IPI00013212,IPI00910540                                     | 50,686.90  | 390 | 398 | IPLKDVVPR                     | R | V | 1,036.65 |
| 5100 | TUBA1A Tubulin alpha-1A chain                                                | IPI00180675                                                 | 50,117.70  | 391 | 402 | LDHKFDLMYAKR                  | R | A | 1,536.80 |
| 5101 | TUBA1C Tubulin alpha-1C chain                                                | IPI00218343                                                 | 49,877.40  | 391 | 402 | LDHKFDLMYAKR                  | R | A | 1,536.80 |
| 5102 | TUBA1B Tubulin alpha-1B chain                                                | IPI00387144,IPI00792677                                     | 50,133.70  | 391 | 402 | LDHKFDLMYAKR                  | R | A | 1,536.80 |
| 5103 | FKBP4 FK506-binding protein 4                                                | IPI00219005                                                 | 51,787.90  | 391 | 399 | TQLAVCQQR                     | K | I | 1,103.56 |
| 5104 | SARS Seryl-tRNA synthetase, cytoplasmic                                      | IPI00220637,IPI00514587                                     | 58,760.60  | 391 | 404 | ELVSCSNCTDYQAR                | R | R | 1,702.72 |

|      |                                                                                   |                         |           |     |     |                                   |   |   |          |
|------|-----------------------------------------------------------------------------------|-------------------------|-----------|-----|-----|-----------------------------------|---|---|----------|
| 5105 | TUBA1A Tubulin alpha-1A chain                                                     | IPI00180675             | 50,117.70 | 391 | 401 | LDHKFDLMYAK                       | R | R | 1,380.70 |
| 5106 | TUBA1C Tubulin alpha-1C chain                                                     | IPI00218343             | 49,877.40 | 391 | 401 | LDHKFDLMYAK                       | R | R | 1,380.70 |
| 5107 | TUBA1B Tubulin alpha-1B chain                                                     | IPI00387144,IPI00792677 | 50,133.70 | 391 | 401 | LDHKFDLMYAK                       | R | R | 1,380.70 |
| 5108 | TCP1 T-complex protein 1 subunit alpha                                            | IPI00290566             | 60,327.20 | 391 | 401 | SLHDALCVVKR                       | R | V | 1,297.70 |
| 5109 | PAFAH1B1 Isoform 1 of Platelet-activating factor acetvlhydrolase IB subunit alpha | IPI00218728             | 46,619.40 | 391 | 405 | TAPYVVVTGSVDQTVK                  | K | V | 1,564.82 |
| 5110 | ABCF2 ATP-binding cassette sub-family F member 2                                  | IPI00005045,IPI00068506 | 71,274.50 | 391 | 404 | IPPPVIMVQNVFSK                    | K | Y | 1,568.89 |
| 5111 | MSN Moesin                                                                        | IPI00219365,IPI00872814 | 67,803.80 | 392 | 408 | ERQEAEAKEALLQASR                  | K | D | 1,957.99 |
| 5112 | DDX5 Probable ATP-dependent RNA helicase DDX5                                     | IPI00017617             | 69,131.70 | 392 | 403 | APILIATDVASR                      | K | G | 1,226.71 |
| 5113 | DDX5 Probable ATP-dependent RNA helicase DDX5                                     | IPI00017617             | 69,131.70 | 392 | 403 | APILIATDVASR                      | K | G | 1,226.71 |
| 5114 | PDIA4 Protein disulfide-isomerase A4                                              | IPI00009904             | 72,916.00 | 392 | 400 | YALPLVGHR                         | K | K | 1,025.59 |
| 5115 | EEF2 Elongation factor 2                                                          | IPI00186290             | 95,322.10 | 392 | 400 | GPLMMYISK                         | K | M | 1,055.53 |
| 5116 | YARS Tyrosyl-tRNA synthetase, cytoplasmic                                         | IPI00007074             | 59,127.10 | 392 | 400 | IDVGEAEPR                         | K | T | 985.495  |
| 5117 | - cDNA FLJ54408, highly similar to Heat shock 70 kDa protein 1                    | IPI00911039             | 63,907.90 | 393 | 403 | AMTKDNNLLGR                       | R | F | 1,248.64 |
| 5118 | FLOT1 Flotillin-1                                                                 | IPI00027438             | 47,336.80 | 393 | 403 | VTGEVLDILTR                       | K | L | 1,215.69 |
| 5119 | CCT5 T-complex protein 1 subunit epsilon                                          | IPI00010720,IPI00910316 | 59,654.30 | 393 | 400 | MIIEEAKR                          | K | S | 989.5449 |
| 5120 | RUVBL2 RuvB-like 2                                                                | IPI00009104             | 51,140.10 | 393 | 400 | IGLETSLR                          | R | Y | 888.515  |
| 5121 | PIP4K2C Phosphatidylinositol-5-phosphate 4-kinase type-2 gamma                    | IPI00152303,IPI00896381 | 47,268.90 | 394 | 410 | HGAGAEISTVHPEQYAK                 | K | R | 1,794.88 |
| 5122 | DPYSL5 Dihydropyrimidinase-related protein 5                                      | IPI00335509             | 61,402.90 | 394 | 411 | IIPGADADVVDPEATK                  | R | T | 1,895.98 |
| 5123 | NOC3L Nucleolar complex protein 3 homolog                                         | IPI00102815,IPI00843861 | 92,534.20 | 394 | 403 | LGQASLGVK                         | K | V | 985.6042 |
| 5124 | HSPA9 Stress-70 protein, mitochondrial                                            | IPI00007765             | 73,663.30 | 395 | 405 | VQQTQVDLFGFR                      | K | A | 1,290.68 |
| 5125 | XRCC5 ATP-dependent DNA helicase 2 subunit 2                                      | IPI00220834,IPI00871391 | 82,689.10 | 395 | 400 | YAYDKR                            | R | A | 815.4046 |
| 5126 | TFRC Transferrin receptor protein 1                                               | IPI00022462             | 84,855.60 | 395 | 409 | GFVEPDHYVVGAQR                    | K | D | 1,672.84 |
| 5127 | TUBA1A Tubulin alpha-1A chain                                                     | IPI00180675             | 50,117.70 | 395 | 401 | FDLMYAK                           | K | R | 887.4332 |
| 5128 | TUBA1C Tubulin alpha-1C chain                                                     | IPI00218343             | 49,877.40 | 395 | 401 | FDLMYAK                           | K | R | 887.4332 |
| 5129 | TUBA1B Tubulin alpha-1B chain                                                     | IPI00387144,IPI00792677 | 50,133.70 | 395 | 401 | FDLMYAK                           | K | R | 887.4332 |
| 5130 | GDI2 cDNA FLJ60299, highly similar to Rab GDP dissociation inhibitor beta         | IPI00031461             | 51,138.50 | 395 | 406 | DLGTESQIFISR                      | K | T | 1,365.70 |
| 5131 | GDI2 cDNA FLJ60299, highly similar to Rab GDP dissociation inhibitor beta         | IPI00031461             | 51,138.50 | 395 | 406 | DLGTESQIFISR                      | K | T | 1,365.70 |
| 5132 | EEF1A1 Elongation factor 1-alpha 1                                                | IPI00396485             | 50,123.20 | 396 | 423 | SGDAAIVDMVPGKPMCVESF              | K | F | 3,027.39 |
| 5133 | EEF1A1 Elongation factor 1-alpha 1                                                | IPI00396485             | 50,123.20 | 396 | 423 | SDYPPPLGR<br>SGDAAIVDMVPGKPMCVESF | K | F | 3,011.40 |
| 5134 | EEF1A1 Elongation factor 1-alpha 1                                                | IPI00396485             | 50,123.20 | 396 | 423 | SDYPPPLGR<br>SGDAAIVDMVPGKPMCVESF | K | F | 3,027.39 |
| 5135 | EEF1A2 Elongation factor 1-alpha 2                                                | IPI00014424             | 50,452.60 | 396 | 423 | SDYPPPLGR<br>SGDAAIVEMVPGKPMCVESF | K | F | 3,054.44 |
| 5136 | CCT4 T-complex protein 1 subunit delta                                            | IPI00302927,IPI00873222 | 57,907.90 | 396 | 403 | SQYPPPLGR<br>LVIEEAER             | K | S | 958.5204 |
| 5137 | PSMC1 26S protease regulatory subunit 4                                           | IPI00011126             | 49,168.40 | 397 | 408 | AICTEAGLMALR                      | K | E | 1,305.67 |
| 5138 | - cDNA FLJ54408, highly similar to Heat shock 70 kDa protein 1                    | IPI00911039             | 63,907.90 | 397 | 403 | DNNLLGR                           | K | F | 801.4214 |
| 5139 | GOT1 Aspartate aminotransferase, cytoplasmic                                      | IPI00219029             | 46,230.10 | 397 | 411 | NLDYVATSIHEAVTK                   | K | I | 1,660.85 |
| 5140 | SF3A1 Splicing factor 3 subunit 1                                                 | IPI00017451             | 88,868.10 | 397 | 424 | ASKPLPPAPAPDEYLVSPITGE<br>KIPASK  | K | M | 2,873.57 |
| 5141 | FARSA Phenylalanyl-tRNA synthetase alpha chain                                    | IPI00031820,IPI00909657 | 57,546.50 | 398 | 404 | LGITQLR                           | K | F | 800.499  |
| 5142 | ACSL3 Long-chain-fatty-acid--CoA ligase 3                                         | IPI00031397             | 80,405.10 | 398 | 406 | VSEMSSFQR                         | K | N | 1,086.49 |
| 5143 | CCT7 T-complex protein 1 subunit eta                                              | IPI00018465             | 59,349.80 | 398 | 418 | RAIKNDSVVAGGGAIEMELSK             | R | Y | 2,161.13 |
| 5144 | HNRNPL Heterogeneous nuclear ribonucleoprotein L                                  | IPI00027834             | 64,114.80 | 399 | 411 | VFNVFCLYGNVEK                     | R | V | 1,588.78 |
| 5145 | DNAJB12 DnaJ (Hsp40) homolog, subfamily B, member 12                              | IPI00014400             | 45,472.60 | 400 | 409 | LSEVQASLHG                        | R | - | 1,040.54 |



|      |                                                                                 |                                     |            |     |     |                       |   |   |          |
|------|---------------------------------------------------------------------------------|-------------------------------------|------------|-----|-----|-----------------------|---|---|----------|
| 5146 | SFPQ Isoform Long of Splicing factor, proline- and glutamine-rich               | IPI00010740                         | 76,131.50  | 400 | 407 | AVVIVDDR              | R | G | 886.4993 |
| 5147 | XRCC5 ATP-dependent DNA helicase 2 subunit 2                                    | IPI00220834,IPI00871391             | 82,689.10  | 400 | 413 | RANPQVGVAFPHIK        | K | H | 1,533.86 |
| 5148 | DDX39 cDNA FLJ55484, highly similar to ATP-dependent RNA helicase DDX39         | IPI00641829,IPI00644431,IPI00848161 | 50,662.10  | 400 | 413 | GLAITFVSDENDAK        | K | I | 1,479.73 |
| 5149 | PPP5C Serine/threonine-protein phosphatase 5                                    | IPI00019812,IPI00793942             | 56,862.20  | 401 | 412 | GVSCQFGPDVTK          | R | A | 1,294.61 |
| 5150 | DDX41 Probable ATP-dependent RNA helicase DDX41                                 | IPI00007208                         | 69,821.60  | 401 | 420 | AGAASLDVIQEVEYVKEEAK  | R | M | 2,149.10 |
| 5151 | CCT5 T-complex protein 1 subunit epsilon                                        | IPI00010720,IPI00910316             | 59,654.30  | 401 | 410 | SLHDALCVIR            | R | N | 1,183.63 |
| 5152 | G3BP2 Isoform A of Ras GTPase-activating protein-binding protein 2              | IPI00009057,IPI00179890             | 54,102.30  | 402 | 407 | LNVEEK                | R | K | 731.3934 |
| 5153 | UTP18 U3 small nucleolar RNA-associated protein 18 homolog                      | IPI00000733                         | 64,046.80  | 402 | 412 | VAASTFSSDSK           | R | K | 1,099.53 |
| 5154 | UTP18 U3 small nucleolar RNA-associated protein 18 homolog                      | IPI00000733                         | 64,046.80  | 402 | 413 | VAASTFSSDSKK          | R | V | 1,227.62 |
| 5155 | KPNA6 cDNA FLJ53229, highly similar to Importin alpha-7 subunit                 | IPI00747764                         | 60,563.50  | 402 | 420 | EAAWAITNATSGGTPEQIR   | K | Y | 1,972.97 |
| 5156 | TUBA1A Tubulin alpha-1A chain                                                   | IPI00180675                         | 50,117.70  | 403 | 422 | AFVHWYVGGEMEEGEFSEA   | R | E | 2,346.01 |
| 5157 | TUBA1C Tubulin alpha-1C chain                                                   | IPI00218343                         | 49,877.40  | 403 | 422 | AFVHWYVGGEMEEGEFSEA   | R | E | 2,346.01 |
| 5158 | TUBA1B Tubulin alpha-1B chain                                                   | IPI00387144,IPI00792677             | 50,133.70  | 403 | 422 | AFVHWYVGGEMEEGEFSEA   | R | E | 2,346.01 |
| 5159 | RRM2 Ribonucleoside-diphosphate reductase M2 subunit                            | IPI00011118                         | 51,076.50  | 403 | 418 | VENPFDPMENISLEGK      | R | T | 1,884.87 |
| 5160 | RRP1 Ribosomal RNA processing protein 1 homolog A                               | IPI00550766                         | 52,822.60  | 404 | 415 | AEAGEQPFTAER          | R | A | 1,215.56 |
| 5161 | CCT4 T-complex protein 1 subunit delta                                          | IPI00302927,IPI00873222             | 57,907.90  | 404 | 413 | SIHDALCVIR            | R | C | 1,183.63 |
| 5162 | PTOV1 Isoform 1 of Prostate tumor overexpressed gene 1 protein                  | IPI00010118                         | 46,851.30  | 404 | 412 | NLEQEQQQR             | R | G | 1,172.57 |
| 5163 | NCL Nucleolin                                                                   | IPI00604620                         | 76,597.90  | 404 | 420 | VTQDELKEVFEDAAEIR     | K | L | 1,991.99 |
| 5164 | HSP90AA1 heat shock protein 90kDa alpha (cytosolic), class A member 1 isoform 1 | IPI00382470,IPI00784295             | 98,147.10  | 404 | 414 | EKYIDQEELNK           | K | T | 1,408.70 |
| 5165 | RUVBL1 Isoform 1 of RuvB-like 1                                                 | IPI00021187                         | 50,211.40  | 405 | 418 | YSVQLTPANLLAK         | R | I | 1,530.89 |
| 5166 | NOP56 Nucleolar protein 5A                                                      | IPI00411937                         | 66,034.00  | 405 | 415 | LSFYETGEIPR           | R | K | 1,311.66 |
| 5167 | ETF1 Eukaryotic peptide chain release factor subunit 1                          | IPI00429191                         | 49,014.60  | 405 | 414 | GFGGIGGILR            | K | Y | 946.5471 |
| 5168 | TOR1AIP1 Putative uncharacterized protein TOR1AIP1                              | IPI00792065                         | 66,301.60  | 406 | 417 | SQPAILLTAAR           | R | D | 1,253.76 |
| 5169 | HSPD1 60 kDa heat shock protein, mitochondrial                                  | IPI00784154                         | 61,037.70  | 406 | 417 | VGGTSDVEVNEK          | K | K | 1,233.60 |
| 5170 | HARS Histidyl-tRNA synthetase, cytoplasmic                                      | IPI00021808                         | 57,394.40  | 406 | 419 | TTETQVLVASAQQK        | R | L | 1,503.84 |
| 5171 | HSP90AA1 heat shock protein 90kDa alpha (cytosolic), class A member 1 isoform 1 | IPI00382470,IPI00784295             | 98,147.10  | 406 | 414 | YIDQEELNK             | K | T | 1,151.56 |
| 5172 | PGK1 Phosphoglycerate kinase 1                                                  | IPI00169383                         | 44,597.30  | 407 | 417 | VLPGVDAISNI           | K | - | 1,097.62 |
| 5173 | ARMC6 Armadillo repeat-containing protein 6                                     | IPI00020196,IPI00871811             | 54,123.50  | 407 | 422 | IIVEGGGAVAALQAMK      | R | A | 1,543.85 |
| 5174 | ENO1 Isoform alpha-enolase of Alpha-enolase                                     | IPI00465248                         | 47,152.20  | 407 | 420 | YNQLLRIEEEELGSK       | K | A | 1,691.90 |
| 5175 | STIP1 Stress-induced-phosphoprotein 1                                           | IPI00013894,IPI00871856             | 62,624.10  | 407 | 415 | LLEFQLALK             | K | D | 1,074.66 |
| 5176 | GDI2 cDNA FLJ60299, highly similar to Rab GDP dissociation inhibitor beta       | IPI00031461                         | 51,138.50  | 407 | 427 | TYDATTHFETTCDDIKNIYKR | R | M | 2,592.20 |
| 5177 | TRIM28 Isoform 1 of Transcription intermediary factor 1-beta                    | IPI00438229,IPI00438230             | 88,531.00  | 408 | 427 | IVAERPGTNSTGPAPMAPPR  | K | A | 2,035.04 |
| 5178 | G3BP1 Ras GTPase-activating protein-binding protein 1                           | IPI00012442                         | 52,144.80  | 408 | 413 | LNVEEK                | R | K | 731.3934 |
| 5179 | DDX3X ATP-dependent RNA helicase DDX3X                                          | IPI00215637                         | 73,227.70  | 408 | 418 | VGSTSENITQK           | R | V | 1,163.59 |
| 5180 | PRPF6 Pre-mRNA-processing factor 6                                              | IPI00305068                         | 106,909.70 | 409 | 420 | AAVELEEPEDAR          | K | I | 1,328.63 |
| 5181 | SMU1 WD40 repeat-containing protein SMU1                                        | IPI00305833                         | 57,526.80  | 409 | 418 | NPEHFVVCNR            | K | S | 1,271.59 |
| 5182 | PFKP 6-phosphofructokinase type C                                               | IPI00009790                         | 85,579.40  | 409 | 430 | TNCNVAVINVGAPAAGMNAAV | K | S | 2,170.09 |
| 5183 | FKBP4 FK506-binding protein 4                                                   | IPI00219005                         | 51,787.90  | 410 | 417 | LYANMFER              | K | L | 1,043.50 |

|      |                                                                                                  |                                     |            |     |     |                    |   |   |          |
|------|--------------------------------------------------------------------------------------------------|-------------------------------------|------------|-----|-----|--------------------|---|---|----------|
| 5184 | PTBP1 Isoform 1 of Polypyrimidine tract-binding protein 1                                        | IPI00179964,IPI00183626,IPI00334175 | 57,204.50  | 411 | 418 | HQNVQLPR           | K | E | 991.5432 |
| 5185 | TRMT1 Isoform 1 of N(2),N(2)-dimethylguanosine tRNA methyltransferase                            | IPI00020508,IPI00178861             | 72,215.30  | 411 | 421 | VLEAVSANPGR        | R | F | 1,112.61 |
| 5186 | NCL Nucleolin                                                                                    | IPI00604620                         | 76,597.90  | 411 | 420 | EVFEDAAEIR         | K | L | 1,178.57 |
| 5187 | FLOT1 Flotillin-1                                                                                | IPI00027438                         | 47,336.80  | 411 | 425 | LTGVVISQVNHKPLR    | R | T | 1,648.95 |
| 5188 | HSP90AB1 Heat shock protein HSP 90-beta                                                          | IPI00414676                         | 83,249.30  | 412 | 428 | CLELFSELAEDKENYKK  | K | F | 2,116.03 |
| 5189 | EZR Ezrin                                                                                        | IPI00746388,IPI00843975,IPI00872684 | 69,265.40  | 412 | 426 | SQEQLAAELAETYAK    | K | I | 1,651.82 |
| 5190 | UBA3 NEDD8-activating enzyme E1 catalytic subunit                                                | IPI00328154,IPI00375533             | 51,835.40  | 412 | 424 | TLYLQSVTSIEER      | R | T | 1,538.81 |
| 5191 | ENO1 Isoform alpha-enolase of Alpha-enolase                                                      | IPI00465248                         | 47,152.20  | 413 | 420 | IEEELGSK           | R | A | 904.4623 |
| 5192 | ENO2 Gamma-enolase                                                                               | IPI00216171                         | 47,251.70  | 413 | 422 | IEEELGDEAR         | R | F | 1,160.54 |
| 5193 | PPP5C Serine/threonine-protein phosphatase 5                                                     | IPI00019812,IPI00793942             | 56,862.20  | 413 | 425 | AFLEENLDYIIR       | K | S | 1,609.82 |
| 5194 | UHRF1 ubiquitin-like with PHD and ring finger domains 1 isoform 2                                | IPI00797279,IPI00797945             | 91,082.30  | 413 | 419 | GMACVGR            | K | T | 750.3386 |
| 5195 | ATP1A1 Isoform Long of Sodium/potassium-transporting ATPase subunit alpha-1                      | IPI00006482,IPI00646182             | 112,881.50 | 414 | 423 | TSATWLALSR         | K | I | 1,105.60 |
| 5196 | SFPQ Isoform Long of Splicing factor, proline- and glutamine-rich                                | IPI00010740                         | 76,131.50  | 414 | 425 | GIVEFASKPAAR       | K | K | 1,245.70 |
| 5197 | GORASP2 cDNA FLJ59712, highly similar to Golgi reassembly-stacking protein 2                     | IPI00743931,IPI00916299             | 48,657.10  | 416 | 432 | ADAASSLTVDPPTAK    | K | A | 1,643.85 |
| 5198 | GOLIM4 Golgi integral membrane protein 4                                                         | IPI00004962                         | 81,859.50  | 416 | 428 | LAVQQVEEAQQLR      | R | E | 1,511.82 |
| 5199 | IDE Insulin-degrading enzyme                                                                     | IPI00220373                         | 117,956.00 | 416 | 423 | DLNAVAFR           | K | F | 905.4839 |
| 5200 | SRP54 Signal recognition particle 54 kDa protein                                                 | IPI00009822                         | 55,688.30  | 416 | 426 | DVQELLTQYTK        | R | F | 1,337.69 |
| 5201 | STIP1 Stress-induced-phosphoprotein 1                                                            | IPI00013894,IPI00871856             | 62,624.10  | 416 | 429 | DCEECIQLEPTFIK     | K | G | 1,781.81 |
| 5202 | RIC8A resistance to inhibitors of cholinesterase 8 homolog A                                     | IPI00100106,IPI00746360,IPI00749304 | 60,354.80  | 416 | 429 | YTYGYNAAGLLAAR     | K | G | 1,397.72 |
| 5203 | EEF2 Elongation factor 2                                                                         | IPI00186290                         | 95,322.10  | 416 | 426 | VFSGLVSTGLK        | R | V | 1,107.64 |
| 5204 | EEF2 Elongation factor 2                                                                         | IPI00186290                         | 95,322.10  | 416 | 426 | VFSGLVSTGLK        | R | V | 1,107.64 |
| 5205 | EEF2 Elongation factor 2                                                                         | IPI00186290                         | 95,322.10  | 416 | 426 | VFSGLVSTGLK        | R | V | 1,107.64 |
| 5206 | EEF2 Elongation factor 2                                                                         | IPI00186290                         | 95,322.10  | 416 | 426 | VFSGLVSTGLK        | R | V | 1,107.64 |
| 5207 | PFKM cDNA FLJ44241 fis, clone THYMU3008436, highly similar to 6-phosphofructokinase, muscle type | IPI00465179,IPI00743142             | 93,203.30  | 417 | 427 | LPLMECVQVTK        | R | D | 1,333.69 |
| 5208 | OXR1 Serine/threonine-protein kinase OSR1                                                        | IPI00010080                         | 58,005.40  | 417 | 431 | TAQALSSGSGSQETK    | K | I | 1,451.70 |
| 5209 | LMNB2 Lamin-B2                                                                                   | IPI00009771,IPI00879819             | 69,931.40  | 417 | 430 | ATSSSSGSLSATGR     | R | L | 1,268.61 |
| 5210 | LPCAT1 1-acylglycerophosphocholine O-acyltransferase 1                                           | IPI00171626                         | 59,134.80  | 417 | 426 | TLDTIQLAFK         | R | M | 1,149.65 |
| 5211 | ATIC Bifunctional purine biosynthesis protein PURH                                               | IPI00289499                         | 64,598.50  | 417 | 426 | DLIVATIAVK         | R | Y | 1,042.65 |
| 5212 | CCNA2 Cyclin-A2                                                                                  | IPI00022865                         | 48,519.60  | 418 | 432 | YHGVSLNPPETLNL     | K | - | 1,666.88 |
| 5213 | DDX24 ATP-dependent RNA helicase DDX24                                                           | IPI00006987                         | 96,316.70  | 418 | 429 | TAILVGGMSTQK       | K | Q | 1,221.65 |
| 5214 | CALD1 Isoform 5 of Caldesmon                                                                     | IPI00333771                         | 61,195.30  | 418 | 429 | LEQYTSAIEGTK       | R | S | 1,339.67 |
| 5215 | EIF4B cDNA FLJ54492, highly similar to Eukaryotic translation initiation factor 4B               | IPI00012079,IPI00908588             | 69,710.40  | 418 | 435 | SRTGSESSQTGTSTTSSR | R | S | 1,816.83 |
| 5216 | RPN1 Dolichyl-diphosphooligosaccharide--protein glycosyltransferase 67 kDa subunit precursor     | IPI00025874                         | 72,762.00  | 419 | 430 | NIEIDSPYEISR       | K | A | 1,435.71 |
| 5217 | YARS Tyrosyl-tRNA synthetase, cytoplasmic                                                        | IPI00007074                         | 59,127.10  | 419 | 430 | LVVVLCNLKPQK       | R | M | 1,410.85 |
| 5218 | CCT7 T-complex protein 1 subunit eta                                                             | IPI00018465                         | 59,349.80  | 419 | 425 | YLRDYSR            | K | T | 972.4897 |
| 5219 | GARS Glycyl-tRNA synthetase                                                                      | IPI00783097,IPI00915808             | 83,123.50  | 420 | 428 | VGISPDKLR          | K | F | 984.5838 |
| 5220 | CCT4 T-complex protein 1 subunit delta                                                           | IPI00302927,IPI00873222             | 57,907.90  | 420 | 435 | ALIAGGGAPEIELALR   | R | L | 1,550.89 |
| 5221 | FAR1 Fatty acyl-CoA reductase 1                                                                  | IPI00478838                         | 59,340.20  | 420 | 426 | TFNIDVR            | K | Q | 864.4574 |
| 5222 | HSPD1 60 kDa heat shock protein, mitochondrial                                                   | IPI00784154                         | 61,037.70  | 421 | 429 | VTDALNATR          | R | A | 960.5109 |
| 5223 | HSPD1 60 kDa heat shock protein, mitochondrial                                                   | IPI00784154                         | 61,037.70  | 421 | 429 | VTDALNATR          | R | A | 960.5109 |
| 5224 | HSP90AA1 heat shock protein 90kDa alpha (cytosolic). class A member 1 isoform 1                  | IPI00382470,IPI00784295             | 98,147.10  | 422 | 436 | NPDDITNEEYGEFYK    | R | S | 1,833.78 |

|      |                                                                    |                                                             |            |     |     |                                     |   |          |          |
|------|--------------------------------------------------------------------|-------------------------------------------------------------|------------|-----|-----|-------------------------------------|---|----------|----------|
| 5225 | TUBA1A Tubulin alpha-1A chain                                      | IPI00180675                                                 | 50,117.70  | 423 | 451 | EDMAALEKDYEEVGVDSVEG R              | - | 3,236.31 |          |
| 5226 | TUBA1B Tubulin alpha-1B chain                                      | IPI00387144,IPI00792677                                     | 50,133.70  | 423 | 451 | EGEEEEGEY<br>EDMAALEKDYEEVGVDSVEG R | - | 3,236.31 |          |
| 5227 | RCC2 Protein RCC2                                                  | IPI00465044                                                 | 56,066.80  | 423 | 431 | AVQDLCGWR                           | K | I        | 1,104.53 |
| 5228 | DDX27 Probable ATP-dependent RNA helicase DDX27                    | IPI00293078                                                 | 89,820.10  | 423 | 436 | IFVNSNTDVAPFLR                      | R | Q        | 1,592.84 |
| 5229 | PSIP1 Isoform 1 of PC4 and SFRS1-interacting protein               | IPI00028122                                                 | 60,085.90  | 423 | 442 | FKNMFLVGEQDSVITQVLNK                | K | S        | 2,255.17 |
| 5230 | HSPA1A;HSPA1B Heat shock 70 kDa protein 1                          | IPI00304925                                                 | 70,036.00  | 424 | 447 | QTQIFTTYSDNQPGVLIQVYE               | K | A        | 2,786.36 |
| 5231 | HSPA8 Isoform 1 of Heat shock cognate 71 kDa protein               | IPI00003865                                                 | 70,881.80  | 424 | 447 | GER<br>QTQIFTTYSDNQPGVLIQVYE        | K | A        | 2,774.33 |
| 5232 | HNRNPU heterogeneous nuclear ribonucleoprotein U isoform a         | IPI00644079                                                 | 90,567.20  | 424 | 433 | GER<br>NGQDLGVAFK                   | K | I        | 1,048.54 |
| 5233 | CHAF1B Chromatin assembly factor 1 subunit B                       | IPI00011857                                                 | 61,474.80  | 424 | 438 | TQDPSSPGTTTPQAR                     | R | Q        | 1,539.74 |
| 5234 | DDX21 Isoform 1 of Nucleolar RNA helicase 2                        | IPI00015953                                                 | 87,328.00  | 424 | 432 | AAVIGDVIR                           | R | V        | 913.5466 |
| 5235 | EIF2A Isoform 1 of Eukaryotic translation initiation factor 2A     | IPI00902564                                                 | 64,973.20  | 425 | 441 | TITYQAVPSEVPNEEPK                   | K | V        | 1,901.95 |
| 5236 | CSE1L Isoform 1 of Exportin-2                                      | IPI00022744,IPI00219994                                     | 110,403.90 | 426 | 440 | HKDAAIYLVTSLASK                     | K | A        | 1,616.90 |
| 5237 | PSMD3 26S proteasome non-ATPase regulatory subunit 3               | IPI00011603                                                 | 60,961.60  | 426 | 440 | LQLDSPEDAEIFIVAK                    | K | A        | 1,674.86 |
| 5238 | CCT7 T-complex protein 1 subunit eta                               | IPI00018465                                                 | 59,349.80  | 426 | 440 | TIPGKQQLLIGAYAK                     | R | A        | 1,600.94 |
| 5239 | NARS Asparaginyl-tRNA synthetase, cytoplasmic                      | IPI00306960                                                 | 62,926.20  | 426 | 439 | LMTDTINEPILLCR                      | R | F        | 1,704.87 |
| 5240 | TOP1 DNA topoisomerase 1                                           | IPI00413611                                                 | 90,711.70  | 426 | 434 | YIMLNPPSSR                          | K | I        | 1,096.55 |
| 5241 | RRM2 Ribonucleoside-diphosphate reductase M2 subunit               | IPI00011118                                                 | 51,076.50  | 426 | 431 | VGEYQR                              | R | M        | 751.3733 |
| 5242 | SFRS4 Splicing factor, arginine/serine-rich 4                      | IPI00000015                                                 | 56,662.00  | 426 | 441 | EGRGESENAGTNQETR                    | R | S        | 1,734.76 |
| 5243 | ENO1 Isoform alpha-enolase of Alpha-enolase                        | IPI00465248                                                 | 47,152.20  | 427 | 434 | NFRNPLAK                            | R | -        | 959.5421 |
| 5244 | CCT3 chaperonin containing TCP1, subunit 3 isoform b               | IPI00290770,IPI00553185                                     | 60,446.30  | 427 | 437 | AMTGVQWQPYR                         | K | A        | 1,353.63 |
| 5245 | EIF2S3 Eukaryotic translation initiation factor 2 subunit 3        | IPI00297982                                                 | 51,092.20  | 427 | 440 | IVLTPVCTEVEGK                       | K | I        | 1,558.81 |
| 5246 | NOP5/NOP58 Nucleolar protein 5                                     | IPI00006379                                                 | 59,562.20  | 427 | 441 | TYDPSGDSTLPTCSK                     | K | K        | 1,628.71 |
| 5247 | NOP5/NOP58 Nucleolar protein 5                                     | IPI00006379                                                 | 59,562.20  | 427 | 441 | TYDPSGDSTLPTCSK                     | K | K        | 1,628.71 |
| 5248 | ATIC Bifunctional purine biosynthesis protein PURH                 | IPI00289499                                                 | 64,598.50  | 427 | 437 | YTQNSVVCYAK                         | K | N        | 1,320.59 |
| 5249 | EZR Ezrin                                                          | IPI00746388,IPI00843975,IPI00872684                         | 69,265.40  | 427 | 434 | IALLEEAR                            | K | R        | 914.5306 |
| 5250 | FKBP4 FK506-binding protein 4                                      | IPI00219005                                                 | 51,787.90  | 427 | 445 | AEASSGDHPTDTEMKEEQK                 | K | S        | 2,105.89 |
| 5251 | ADAR Isoform 2 of Double-stranded RNA-specific adenosine deaminase | IPI00025057,IPI00025058,IPI00394665,IPI00394668,IPI00760588 | 103,627.20 | 427 | 441 | YLNTNPVGGLLLEYAR                    | R | S        | 1,679.88 |
| 5252 | PDCD6IP PDCD6IP protein                                            | IPI00246058                                                 | 96,802.50  | 428 | 443 | SVIEQGGIQTVDQLIK                    | R | E        | 1,727.95 |
| 5253 | RDX Radixin, isoform CRA_a                                         | IPI00017367,IPI00903145                                     | 71,032.60  | 428 | 436 | IALLEEAKK                           | K | K        | 1,014.62 |
| 5254 | ZMPSTE24 CAAX prenyl protease 1 homolog                            | IPI00027180                                                 | 54,798.00  | 428 | 437 | AKDLYSALIK                          | K | L        | 1,121.66 |
| 5255 | RACGAP1 Rac GTPase-activating protein 1                            | IPI00152946                                                 | 71,009.80  | 428 | 437 | NLKEPLTFR                           | R | L        | 1,230.72 |
| 5256 | MSN Moesin                                                         | IPI00219365,IPI00872814                                     | 67,803.80  | 428 | 435 | ISQLEMAR                            | R | Q        | 947.4979 |
| 5257 | TBL2 Transducin beta-like 2 protein                                | IPI00000948                                                 | 49,780.50  | 428 | 440 | LQQQLTQAQETLK                       | R | S        | 1,528.83 |
| 5258 | TFRC Transferrin receptor protein 1                                | IPI00022462                                                 | 84,855.60  | 429 | 439 | LAQMFSDMVLK                         | K | D        | 1,314.64 |
| 5259 | EEF2 Elongation factor 2                                           | IPI00186290                                                 | 95,322.10  | 429 | 439 | IMGPNYTPGKK                         | R | E        | 1,205.63 |
| 5260 | RUVBL2 RuvB-like 2                                                 | IPI00009104                                                 | 51,140.10  | 429 | 438 | VYSLFLDESR                          | R | S        | 1,228.62 |
| 5261 | EEF2 Elongation factor 2                                           | IPI00186290                                                 | 95,322.10  | 429 | 449 | IMGPNYTPGKKEDLYLKPIQR               | R | T        | 2,477.32 |
| 5262 | HSPD1 60 kDa heat shock protein, mitochondrial                     | IPI00784154                                                 | 61,037.70  | 430 | 446 | AAVEEGIVLGGGCALLR                   | R | C        | 1,684.91 |
| 5263 | TOMM70A Mitochondrial import receptor subunit TOM70                | IPI00015602                                                 | 67,439.20  | 430 | 441 | LRPESALAAQAK                        | R | C        | 1,311.74 |
| 5264 | RHOT2 Isoform 1 of Mitochondrial Rho GTPase 2                      | IPI00465059                                                 | 68,099.60  | 430 | 439 | SAFLQAFLGR                          | K | G        | 1,109.61 |
| 5265 | HNRNPM Isoform 1 of Heterogeneous nuclear ribonucleoprotein M      | IPI00171903,IPI00383296                                     | 77,499.30  | 430 | 436 | VGSEIER                             | R | M        | 789.4101 |

|      |                                                                                                  |                                                             |            |     |     |                         |   |   |          |
|------|--------------------------------------------------------------------------------------------------|-------------------------------------------------------------|------------|-----|-----|-------------------------|---|---|----------|
| 5266 | EIF2AK2 Interferon-induced, double-stranded RNA-activated protein kinase                         | IPI00019463,IPI00385404                                     | 62,079.10  | 430 | 440 | IGDFGLVTSLK             | K | N | 1,149.65 |
| 5267 | CALD1 Isoform 5 of Caldesmon                                                                     | IPI00333771                                                 | 61,195.30  | 430 | 449 | SAKPTKPAASDLPVPAEGVR    | K | N | 1,991.09 |
| 5268 | GNL3 Isoform 2 of Guanine nucleotide-binding protein-like 3                                      | IPI00003886,IPI00306380                                     | 60,527.60  | 430 | 463 | AIKGPLANSILFQSSGLTNGII  | R | R | 3,698.98 |
| 5269 | NCL Nucleolin                                                                                    | IPI00604620                                                 | 76,597.90  | 430 | 437 | EEKDIHEELPK<br>GIAYIEFK | K | T | 940.5139 |
| 5270 | EEF1A1 Elongation factor 1-alpha 1                                                               | IPI00396485                                                 | 50,123.20  | 431 | 439 | QTVAVGVK                | R | A | 914.567  |
| 5271 | RCC1 regulator of chromosome condensation 1 isoform a                                            | IPI00001661,IPI00747309,IPI00787306                         | 48,126.30  | 431 | 447 | VVLSVSSGGQHTVLLVK       | R | D | 1,723.01 |
| 5272 | EEF1A2 Elongation factor 1-alpha 2                                                               | IPI00014424                                                 | 50,452.60  | 431 | 439 | QTVAVGVK                | R | N | 914.567  |
| 5273 | HSPH1 Isoform Beta of Heat shock protein 105 kDa                                                 | IPI00218993,IPI00513743                                     | 92,099.00  | 431 | 436 | VLTFLLR                 | K | R | 748.4716 |
| 5274 | ATAD3A Isoform 2 of ATPase family AAA domain-containing protein 3A                               | IPI00295992,IPI00643435,IPI00646144                         | 66,201.40  | 431 | 439 | ATLNAFLYR               | R | T | 1,068.58 |
| 5275 | MPP6 MAGUK p55 subfamily member 6                                                                | IPI00303280,IPI00916455,IPI00917964                         | 61,100.80  | 431 | 442 | TCILDVNPQALK            | R | V | 1,371.73 |
| 5276 | CUGBP1 Isoform 1 of CUG-BP- and ETR-3-like factor 1                                              | IPI00034015,IPI00218388,IPI00218389,IPI00853009             | 52,046.00  | 432 | 442 | VFDIKQTNLSK             | K | C | 1,292.72 |
| 5277 | PDE12 Isoform 1 of 2',5'-phosphodiesterase 12                                                    | IPI00174390,IPI00886797                                     | 67,333.70  | 432 | 444 | SSVLQVSVLQSTK           | R | D | 1,375.78 |
| 5278 | RHOT1 Isoform 3 of Mitochondrial Rho GTPase 1                                                    | IPI00217536,IPI00432452,IPI00651681,IPI00759714,IPI00759775 | 79,531.40  | 432 | 441 | SGVLQALLGR              | K | N | 1,013.61 |
| 5279 | STIP1 Stress-induced-phosphoprotein 1                                                            | IPI00013894,IPI00871856                                     | 62,624.10  | 434 | 446 | KAAALEAMKDYTK           | R | A | 1,439.76 |
| 5280 | TARS Threonyl-tRNA synthetase, cytoplasmic                                                       | IPI00329633,IPI00908949                                     | 83,419.80  | 434 | 442 | LADFGVLHR               | R | N | 1,027.57 |
| 5281 | TCP1 T-complex protein 1 subunit alpha                                                           | IPI00290566                                                 | 60,327.20  | 434 | 443 | EQLAIAEFAR              | R | S | 1,147.61 |
| 5282 | CAMK2D Isoform Delta 6 of Calcium/calmodulin-dependent protein kinase type II delta chain        | IPI00172636,IPI00430291,IPI00827573,IPI00827625,IPI00876923 | 54,111.10  | 434 | 445 | LTQYMDGSGMPK            | R | T | 1,359.59 |
| 5283 | TARS Threonyl-tRNA synthetase, cytoplasmic                                                       | IPI00329633,IPI00908949                                     | 83,419.80  | 434 | 454 | LADFGVLHRNELSGALTGLTR   | R | V | 2,240.21 |
| 5284 | STIP1 Stress-induced-phosphoprotein 1                                                            | IPI00013894,IPI00871856                                     | 62,624.10  | 435 | 446 | AAALEAMKDYTK            | K | A | 1,327.66 |
| 5285 | NONO Non-POU domain-containing octamer-binding protein                                           | IPI00304596                                                 | 54,213.60  | 435 | 456 | FGQAATMEGIGAIGGTPPAFN   | R | A | 2,179.06 |
| 5286 | HSP90B1 Endoplasmic                                                                              | IPI00027230                                                 | 92,453.70  | 435 | 448 | GVVSDDDLPLNVSR          | K | E | 1,485.75 |
| 5287 | CORO1C Coronin-1C_i3 protein                                                                     | IPI00867509                                                 | 58,930.80  | 435 | 444 | NADPILISLK              | K | H | 1,083.64 |
| 5288 | PFKP 6-phosphofructokinase type C                                                                | IPI00009790                                                 | 85,579.40  | 435 | 442 | VGIADGHR                | R | M | 824.4374 |
| 5289 | DHX9 ATP-dependent RNA helicase A                                                                | IPI00844578                                                 | 140,943.50 | 435 | 446 | AAECNIVVTQPR            | R | R | 1,357.69 |
| 5290 | DHX9 ATP-dependent RNA helicase A                                                                | IPI00844578                                                 | 140,943.50 | 435 | 446 | AAECNIVVTQPR            | R | R | 1,357.69 |
| 5291 | RARS Isoform Complexed of Arginyl-tRNA synthetase, cytoplasmic                                   | IPI00004860                                                 | 75,364.00  | 436 | 451 | VFHAGFGVVLGEDKKK        | R | F | 1,730.96 |
| 5292 | SARS Seryl-tRNA synthetase, cytoplasmic                                                          | IPI00220637,IPI00514587                                     | 58,760.60  | 436 | 448 | TICAILENYQTEK           | R | G | 1,582.78 |
| 5293 | GMPS GMP synthase [glutamine-hydrolyzing]                                                        | IPI00029079                                                 | 76,698.70  | 436 | 446 | HPFPGPLAIR              | R | V | 1,161.65 |
| 5294 | GDI1 Rab GDP dissociation inhibitor alpha                                                        | IPI00010154,IPI00910113                                     | 50,566.10  | 437 | 447 | KQNDVFGAEAQ             | R | - | 1,264.58 |
| 5295 | PFKM cDNA FLJ44241 fis, clone THYMU3008436, highly similar to 6-phosphofructokinase, muscle type | IPI00465179,IPI00743142                                     | 93,203.30  | 437 | 445 | KFDEALKLR               | K | G | 1,119.65 |
| 5296 | HSP90AA1 heat shock protein 90kDa alpha (cytosolic), class A member 1 isoform 1                  | IPI00382470,IPI00784295                                     | 98,147.10  | 437 | 449 | SLTNDWEDHLAVK           | K | H | 1,527.74 |
| 5297 | ATP2A2 Isoform SERCA2A of Sarcoplasmic/endoplasmic reticulum calcium ATPase 2                    | IPI00177817,IPI00219078,IPI00747443                         | 109,674.90 | 437 | 451 | VGEATETALTCLVEK         | K | M | 1,620.82 |
| 5298 | UTP18 U3 small nucleolar RNA-associated protein 18 homolog                                       | IPI00000733                                                 | 64,046.80  | 437 | 452 | FVDEGSLYGLSIATSR        | R | N | 1,714.86 |
| 5299 | MCCC1 Methylcrotonoyl-CoA carboxylase subunit alpha, mitochondrial                               | IPI00024580,IPI00792499                                     | 80,455.60  | 437 | 444 | LVVWAADR                | K | Q | 929.5203 |
| 5300 | ACTN4 Alpha-actinin-4                                                                            | IPI00013808                                                 | 104,839.20 | 438 | 450 | HRDYETATLSDIK           | K | A | 1,548.77 |
| 5301 | ATIC Bifunctional purine biosynthesis protein PURH                                               | IPI00289499                                                 | 64,598.50  | 438 | 451 | NGQVIGIGAGQQSR          | K | I | 1,384.73 |
| 5302 | NCL Nucleolin                                                                                    | IPI00604620                                                 | 76,597.90  | 438 | 449 | TEADAEKTFEEK            | K | Q | 1,397.64 |
| 5303 | DDX5 Probable ATP-dependent RNA helicase DDX5                                                    | IPI00017617                                                 | 69,131.70  | 438 | 451 | TGTAYTFFTPNNIK          | K | Q | 1,574.79 |
| 5304 | CCT3 chaperonin containing TCP1, subunit 3 isoform b                                             | IPI00290770,IPI00553185                                     | 60,446.30  | 438 | 448 | AVAQALEVIPR             | R | T | 1,166.69 |

|      |                                                                                 |                                                 |            |     |     |                                 |   |   |          |
|------|---------------------------------------------------------------------------------|-------------------------------------------------|------------|-----|-----|---------------------------------|---|---|----------|
| 5305 | CCT3 chaperonin containing TCP1, subunit 3 isoform b                            | IPI00290770,IPI00553185                         | 60,446.30  | 438 | 448 | AVAQALEVIPR                     | R | T | 1,166.69 |
| 5306 | KPNA1 Importin subunit alpha-1                                                  | IPI00303292                                     | 60,232.00  | 439 | 452 | IVQVALNGLLENILR                 | K | L | 1,551.92 |
| 5307 | EEF2 Elongation factor 2                                                        | IPI00186290                                     | 95,322.10  | 439 | 449 | KEDLYLKPIQR                     | K | T | 1,402.81 |
| 5308 | - cDNA FLJ53381, highly similar to Monocarboxylate transporter 1                | IPI00910164                                     | 51,820.20  | 440 | 459 | ESKEEETSIDVAGKPNEVTK            | K | A | 2,190.08 |
| 5309 | - cDNA FLJ53381, highly similar to Monocarboxylate transporter 1                | IPI00910164                                     | 51,820.20  | 440 | 459 | ESKEEETSIDVAGKPNEVTK            | K | A | 2,190.08 |
| 5310 | CCT8 T-complex protein 1 subunit theta                                          | IPI00784090                                     | 59,603.00  | 440 | 450 | KFAEAFEAIPIR                    | K | A | 1,278.68 |
| 5311 | CCT8 T-complex protein 1 subunit theta                                          | IPI00784090                                     | 59,603.00  | 441 | 450 | FAEAFEAIPIR                     | K | A | 1,150.59 |
| 5312 | SMU1 WD40 repeat-containing protein SMU1                                        | IPI00305833                                     | 57,526.80  | 441 | 453 | EGGDFVCCALSPR                   | R | G | 1,467.64 |
| 5313 | CCT7 T-complex protein 1 subunit eta                                            | IPI00018465                                     | 59,349.80  | 441 | 447 | ALEIIPR                         | K | Q | 811.5037 |
| 5314 | BRD2 Isoform 1 of Bromodomain-containing protein 2                              | IPI00014414,IPI00797929,IPI00893088,IPI00893622 | 88,045.30  | 441 | 449 | KLQDVFEFR                       | R | Y | 1,181.63 |
| 5315 | CCT4 T-complex protein 1 subunit delta                                          | IPI00302927,IPI00873222                         | 57,907.90  | 442 | 452 | TLSGMESYCVR                     | R | A | 1,302.58 |
| 5316 | KPNA6 cDNA FLJ53229, highly similar to Importin alpha-7 subunit                 | IPI00747764                                     | 60,563.50  | 442 | 455 | IVQVALNGLLENILR                 | K | L | 1,551.92 |
| 5317 | SRP72 Signal recognition particle 72 kDa protein                                | IPI00215888                                     | 74,590.30  | 443 | 451 | SPAHLSLIR                       | K | E | 993.584  |
| 5318 | PFKP 6-phosphofructokinase type C                                               | IPI00009790                                     | 85,579.40  | 443 | 455 | MLAIYDGFDFGFAK                  | R | G | 1,447.69 |
| 5319 | TARS Threonyl-tRNA synthetase, cytoplasmic                                      | IPI00329633,IPI00908949                         | 83,419.80  | 443 | 454 | NELSGALTGLTR                    | R | V | 1,231.66 |
| 5320 | ATP6V1A V-type proton ATPase catalytic subunit A                                | IPI00007682                                     | 68,287.40  | 443 | 456 | KHFPSVNWLISYSK                  | R | Y | 1,705.91 |
| 5321 | TCP1 T-complex protein 1 subunit alpha                                          | IPI00290566                                     | 60,327.20  | 444 | 466 | LLLVIPNTLAVNAAQDSTDLVA          | R | L | 2,353.30 |
| 5322 | PTBP1 Isoform 1 of Polypyrimidine tract-binding protein 1                       | IPI00179964,IPI00183626,IPI00334175             | 57,204.50  | 445 | 471 | NFQNIFFPSATLHLSNIPPSVS<br>EEDLK | K | V | 2,994.52 |
| 5323 | RUVBL1 Isoform 1 of RuvB-like 1                                                 | IPI00021187                                     | 50,211.40  | 446 | 456 | ILADQQDKYMK                     | K | - | 1,368.68 |
| 5324 | FKBP4 FK506-binding protein 4                                                   | IPI00219005                                     | 51,787.90  | 446 | 459 | SNTAGSQSQVETEA                  | K | - | 1,408.62 |
| 5325 | ATP1A1 Isoform Long of Sodium/potassium-transporting ATPase subunit alpha-1     | IPI00006482,IPI00646182                         | 112,881.50 | 446 | 458 | AVAGDASESALLK                   | R | C | 1,231.65 |
| 5326 | GEMIN4 Component of gems 4                                                      | IPI00027717                                     | 119,975.10 | 446 | 456 | ALFREPDVLVLR                    | R | L | 1,328.77 |
| 5327 | - cDNA FLJ54408, highly similar to Heat shock 70 kDa protein 1                  | IPI00911039                                     | 63,907.90  | 446 | 454 | ITITNDKGR                       | K | L | 1,017.57 |
| 5328 | SEPT9 septin 9 isoform a                                                        | IPI00784614,IPI00784808,IPI00784936             | 65,384.30  | 446 | 454 | ADTLTLEER                       | K | V | 1,047.53 |
| 5329 | STIP1 Stress-induced-phosphoprotein 1                                           | IPI00013894,IPI00871856                         | 62,624.10  | 447 | 453 | AMDVYQK                         | K | A | 870.4027 |
| 5330 | TKT cDNA FLJ54957, highly similar to Transketolase                              | IPI00643920                                     | 68,725.40  | 447 | 464 | SVPTSTVFYPSDGVATEK              | R | A | 1,884.92 |
| 5331 | ACSL3 Long-chain-fatty-acid--CoA ligase 3                                       | IPI00031397                                     | 80,405.10  | 447 | 461 | LLLCGGAPLSATTQR                 | R | F | 1,557.84 |
| 5332 | GMPS GMP synthase [glutamine-hydrolyzing]                                       | IPI00029079                                     | 76,698.70  | 447 | 467 | VICAEPEYICKDFPETNNILK           | R | I | 2,553.24 |
| 5333 | XRN2 Isoform 1 of 5'-3' exoribonuclease 2                                       | IPI00100151,IPI00788157                         | 108,567.60 | 447 | 458 | NSPGSQVASNPR                    | R | Q | 1,213.59 |
| 5334 | DDX27 Probable ATP-dependent RNA helicase DDX27                                 | IPI00293078                                     | 89,820.10  | 447 | 460 | EGDREAIVAALLTR                  | R | T | 1,513.83 |
| 5335 | HSPA1A;HSPA1B Heat shock 70 kDa protein 1                                       | IPI00304925                                     | 70,036.00  | 448 | 458 | AMTKDNLLGR                      | R | F | 1,248.64 |
| 5336 | CCT7 T-complex protein 1 subunit eta                                            | IPI00018465                                     | 59,349.80  | 448 | 463 | QLCDNAGFDATNILNK                | R | L | 1,793.85 |
| 5337 | EZR Ezrin                                                                       | IPI00746388,IPI00843975,IPI00872684             | 69,265.40  | 448 | 457 | AKEAQDDLK                       | R | T | 1,116.59 |
| 5338 | API5 Isoform 2 of Apoptosis inhibitor 5                                         | IPI00554742,IPI00555572,IPI00855856             | 56,754.30  | 449 | 455 | VEIQKQR                         | K | A | 829.4891 |
| 5339 | CCT3 chaperonin containing TCP1, subunit 3 isoform b                            | IPI00290770,IPI00553185                         | 60,446.30  | 449 | 460 | TLIQNCGASTIR                    | R | L | 1,333.69 |
| 5340 | CCT3 chaperonin containing TCP1, subunit 3 isoform b                            | IPI00290770,IPI00553185                         | 60,446.30  | 449 | 460 | TLIQNCGASTIR                    | R | L | 1,333.69 |
| 5341 | KHSRP KH-type splicing regulatory protein                                       | IPI00479786,IPI00855957                         | 73,097.60  | 449 | 462 | AINQQTGAFVEISR                  | K | Q | 1,533.80 |
| 5342 | HNRNPL Heterogeneous nuclear ribonucleoprotein L                                | IPI00027834                                     | 64,114.80  | 449 | 455 | LNVCVSK                         | K | Q | 819.4393 |
| 5343 | MSN Moesin                                                                      | IPI00219365,IPI00872814                         | 67,803.80  | 449 | 458 | AQMVQEDLEK                      | K | T | 1,206.57 |
| 5344 | HSPA5 HSPA5 protein                                                             | IPI00003362                                     | 72,405.60  | 449 | 465 | SQIFSTASDNQPTVTIK               | K | V | 1,836.93 |
| 5345 | HSP90AA1 heat shock protein 90kDa alpha (cytosolic), class A member 1 isoform 1 | IPI00382470,IPI00784295                         | 98,147.10  | 450 | 460 | HFSVEGQLEFR                     | K | A | 1,348.66 |
| 5346 | CCT6A T-complex protein 1 subunit zeta                                          | IPI00027626,IPI00552590                         | 58,007.30  | 450 | 465 | VLAQNSGFDLQETLVK                | K | I | 1,761.94 |



|      |                                                                                |                                                                         |            |     |     |                               |   |   |          |
|------|--------------------------------------------------------------------------------|-------------------------------------------------------------------------|------------|-----|-----|-------------------------------|---|---|----------|
| 5347 | HNRNPUL1 Isoform 1 of Heterogeneous nuclear ribonucleoprotein U-like protein 1 | IPI00013070,IPI00167147                                                 | 95,721.70  | 450 | 461 | YNILGTNAIMDK                  | K | M | 1,368.68 |
| 5348 | DHX15 Putative pre-mRNA-splicing factor ATP-dependent RNA helicase DHX15       | IPI00396435                                                             | 90,917.20  | 451 | 463 | IRVESLLVTAISK                 | R | A | 1,428.88 |
| 5349 | EEF1G cDNA FLJ56389, highly similar to Elongation factor 1-gamma               | IPI00000875,IPI00747497                                                 | 56,132.90  | 451 | 464 | KLDPGSEETQTLVR                | R | E | 1,572.82 |
| 5350 | UBA1 Ubiquitin-like modifier-activating enzyme 1                               | IPI00645078                                                             | 117,832.30 | 451 | 465 | YDQQVAVFGSDLQEK               | R | L | 1,655.79 |
| 5351 | DDX42 Isoform 1 of ATP-dependent RNA helicase DDX42                            | IPI00409671,IPI00829889                                                 | 102,958.90 | 451 | 458 | DILIDPIR                      | R | V | 954.5621 |
| 5352 | HSP90AB1 Heat shock protein HSP 90-beta                                        | IPI00414676                                                             | 83,249.30  | 451 | 456 | LSELLR                        | R | Y | 730.4458 |
| 5353 | HSP90AB1 Heat shock protein HSP 90-beta                                        | IPI00414676                                                             | 83,249.30  | 451 | 456 | LSELLR                        | R | Y | 730.4458 |
| 5354 | EEF1G cDNA FLJ56389, highly similar to Elongation factor 1-gamma               | IPI00000875,IPI00747497                                                 | 56,132.90  | 452 | 464 | LDPGSEETQTLVR                 | K | E | 1,444.73 |
| 5355 | TTL12 Tubulin-tyrosine ligase-like protein 12                                  | IPI00029048,IPI00879002                                                 | 74,385.70  | 452 | 461 | YIESPVLFLR                    | K | E | 1,236.70 |
| 5356 | HSPA1A;HSPA1B Heat shock 70 kDa protein 1                                      | IPI00304925                                                             | 70,036.00  | 452 | 458 | DNNLLGR                       | K | F | 801.4214 |
| 5357 | HSPA1A;HSPA1B Heat shock 70 kDa protein 1                                      | IPI00304925                                                             | 70,036.00  | 452 | 458 | DNNLLGR                       | K | F | 801.4214 |
| 5358 | DDX3X ATP-dependent RNA helicase DDX3X                                         | IPI00215637                                                             | 73,227.70  | 452 | 475 | KGADSLEDFLYHEGYACTSIH<br>GDR  | K | S | 2,741.23 |
| 5359 | IGF2BP1 Insulin-like growth factor 2 mRNA-binding protein 1                    | IPI00008557                                                             | 63,438.30  | 453 | 465 | MVIITGPPEAQFK                 | R | A | 1,446.77 |
| 5360 | IGF2BP3 Isoform 1 of Insulin-like growth factor 2 mRNA-binding protein 3       | IPI00658000                                                             | 63,702.90  | 453 | 465 | MVIITGPPEAQFK                 | R | A | 1,446.77 |
| 5361 | PARP1 Poly [ADP-ribose] polymerase 1                                           | IPI00449049                                                             | 113,069.80 | 453 | 467 | VVSEDFLQDVSASTK               | R | S | 1,624.81 |
| 5362 | PARP1 Poly [ADP-ribose] polymerase 1                                           | IPI00449049                                                             | 113,069.80 | 453 | 467 | VVSEDFLQDVSASTK               | R | S | 1,624.81 |
| 5363 | STIP1 Stress-induced-phosphoprotein 1                                          | IPI00013894,IPI00871856                                                 | 62,624.10  | 454 | 470 | ALDLSSCKEADGYQR               | K | C | 1,898.86 |
| 5364 | STIP1 Stress-induced-phosphoprotein 1                                          | IPI00013894,IPI00871856                                                 | 62,624.10  | 454 | 462 | ALDLSSCK                      | K | E | 1,008.47 |
| 5365 | LOC442497;SLC3A2 4F2 cell-surface antigen heavy chain                          | IPI00027493,IPI00554481,IPI00554611,IPI00554702,IPI00554722,IPI00604710 | 57,929.40  | 455 | 461 | HWDQNER                       | R | F | 984.4282 |
| 5366 | - cDNA FLJ54408, highly similar to Heat shock 70 kDa protein 1                 | IPI00911039                                                             | 63,907.90  | 455 | 462 | LSKEEIER                      | R | M | 1,003.54 |
| 5367 | COPG Coatamer subunit gamma                                                    | IPI00783982                                                             | 97,701.40  | 455 | 465 | ILHLLGQEGPK                   | R | T | 1,204.71 |
| 5368 | LCP1 Plastin-2                                                                 | IPI00010471                                                             | 70,274.10  | 456 | 468 | KLENCNYAVELGK                 | K | N | 1,537.77 |
| 5369 | PFKP 6-phosphofructokinase type C                                              | IPI00009790                                                             | 85,579.40  | 456 | 480 | GQIKEIGWTDVGGWTGQGG<br>SILGTK | K | R | 2,545.31 |
| 5370 | HNRNPM Isoform 1 of Heterogeneous nuclear ribonucleoprotein M                  | IPI00171903,IPI00383296                                                 | 77,499.30  | 457 | 471 | MGPLGLDHMASSIER               | R | M | 1,645.77 |
| 5371 | HSP90AB1 Heat shock protein HSP 90-beta                                        | IPI00414676                                                             | 83,249.30  | 457 | 475 | YHTSQSGDEMTSLSEYVSR           | R | M | 2,192.94 |
| 5372 | PLS1 Plastin-1                                                                 | IPI00032304,IPI00789401                                                 | 70,338.30  | 457 | 469 | KIENCNYAVELGK                 | K | N | 1,537.77 |
| 5373 | LCP1 Plastin-2                                                                 | IPI00010471                                                             | 70,274.10  | 457 | 468 | LENCNYAVELGK                  | K | N | 1,409.67 |
| 5374 | NONO Non-POU domain-containing octamer-binding protein                         | IPI00304596                                                             | 54,213.60  | 457 | 468 | AAPGAEFAPNKR                  | R | R | 1,228.64 |
| 5375 | KIF2C Isoform 1 of Kinesin-like protein KIF2C                                  | IPI00290435,IPI00645758                                                 | 81,296.50  | 457 | 469 | TSGQTFANSNSSR                 | R | S | 1,356.61 |
| 5376 | ANXA6 annexin VI isoform 2                                                     | IPI00002459,IPI00221226                                                 | 75,262.70  | 457 | 465 | ALIEILATR                     | K | T | 999.6198 |
| 5377 | EEF2 Elongation factor 2                                                       | IPI00186290                                                             | 95,322.10  | 457 | 481 | YVEPIEDVPCGNIVGLVGDQ<br>FLVK  | R | T | 2,759.43 |
| 5378 | RIC8A resistance to inhibitors of cholinesterase 8 homolog A                   | IPI00100106,IPI00746360,IPI00749304                                     | 60,354.80  | 457 | 465 | ASINPVTGR                     | K | V | 914.5054 |
| 5379 | PLS1 Plastin-1                                                                 | IPI00032304,IPI00789401                                                 | 70,338.30  | 458 | 469 | IENCNYAVELGK                  | K | N | 1,409.67 |
| 5380 | PLS3 plastin 3                                                                 | IPI00216694                                                             | 70,795.90  | 459 | 471 | KLENCNYAVELGK                 | K | H | 1,537.77 |
| 5381 | SLC2A1 Solute carrier family 2, facilitated glucose transporter member 1       | IPI00220194,IPI00872375,IPI00909237                                     | 54,067.30  | 459 | 468 | TFDEIASGFR                    | R | Q | 1,142.55 |
| 5382 | PLS3 plastin 3                                                                 | IPI00216694                                                             | 70,795.90  | 460 | 471 | LENCNYAVELGK                  | K | H | 1,409.67 |
| 5383 | CCT8 T-complex protein 1 subunit theta                                         | IPI00784090                                                             | 59,603.00  | 460 | 466 | ANEVISK                       | K | L | 760.4199 |
| 5384 | PFKP 6-phosphofructokinase type C                                              | IPI00009790                                                             | 85,579.40  | 460 | 480 | EIGWTDVGGWTGQGG<br>SILGT<br>K | K | R | 2,119.05 |
| 5385 | ATP6V1A V-type proton ATPase catalytic subunit A                               | IPI00007682                                                             | 68,287.40  | 460 | 476 | ALDEYYDKHFTEFVPLR             | R | T | 2,143.05 |
| 5386 | ILF3 Isoform 1 of Interleukin enhancer-binding factor 3                        | IPI00298788                                                             | 95,320.90  | 461 | 474 | VLQDMGLPTGAEGR                | K | D | 1,443.73 |

|      |                                                                                 |                                                 |            |     |     |                                      |   |   |          |
|------|---------------------------------------------------------------------------------|-------------------------------------------------|------------|-----|-----|--------------------------------------|---|---|----------|
| 5387 | EIF2S3 Eukaryotic translation initiation factor 2 subunit 3                     | IP100297982                                     | 51,092.20  | 462 | 472 | GVTIKPTVDDD                          | R | - | 1,159.58 |
| 5388 | HSPH1 Isoform Beta of Heat shock protein 105 kDa                                | IP100218993,IP100513743                         | 92,099.00  | 462 | 471 | FVVQNVSAQK                           | R | D | 1,119.62 |
| 5389 | ATIC Bifunctional purine biosynthesis protein PURH                              | IP100289499                                     | 64,598.50  | 462 | 468 | ANYWWLR                              | K | H | 1,008.50 |
| 5390 | TOM1 cDNA FLJ54710, highly similar to Target of Myb protein 1                   | IP100023191,IP100879680,IP100913835,IP100913911 | 54,814.10  | 462 | 487 | AADRLPNLSSPSAEGPPGPP<br>SGPAPR       | K | K | 2,495.26 |
| 5391 | PHGDH D-3-phosphoglycerate dehydrogenase                                        | IP100011200                                     | 56,632.60  | 462 | 469 | DLPLLLFR                             | R | T | 986.6035 |
| 5392 | - cDNA FLJ54408, highly similar to Heat shock 70 kDa protein 1                  | IP100911039                                     | 63,907.90  | 463 | 471 | MVQEAEKYK                            | R | A | 1,141.56 |
| 5393 | STIP1 Stress-induced-phosphoprotein 1                                           | IP100013894,IP100871856                         | 62,624.10  | 463 | 470 | EAADGYQR                             | K | C | 909.4061 |
| 5394 | - cDNA FLJ54408, highly similar to Heat shock 70 kDa protein 1                  | IP100911039                                     | 63,907.90  | 463 | 478 | MVQEAEKYKAEDEVQR                     | R | E | 1,952.94 |
| 5395 | IGF2BP2 insulin-like growth factor 2 mRNA binding protein 2 isoform a           | IP100179713,IP100180983,IP100743914             | 66,104.40  | 463 | 474 | IAPAEGPDVSER                         | K | M | 1,240.62 |
| 5396 | TMPO Lamina-associated polypeptide 2, isoform alpha                             | IP100216230                                     | 75,475.80  | 463 | 478 | TVVSHSLTTLGLEVAK                     | K | Q | 1,654.94 |
| 5397 | HSPD1 60 kDa heat shock protein, mitochondrial                                  | IP100784154                                     | 61,037.70  | 463 | 470 | IGIEIKR                              | K | T | 941.6144 |
| 5398 | HSPD1 60 kDa heat shock protein, mitochondrial                                  | IP100784154                                     | 61,037.70  | 463 | 470 | IGIEIKR                              | K | T | 941.6144 |
| 5399 | HNRNPU heterogeneous nuclear ribonucleoprotein U isoform a                      | IP100644079                                     | 90,567.20  | 463 | 484 | EKPYFPIPEEYTFIQNVPLEDR               | K | V | 2,724.36 |
| 5400 | WARS Tryptophanyl-tRNA synthetase, cytoplasmic                                  | IP100295400                                     | 53,149.60  | 465 | 471 | KLSFDFQ                              | R | - | 884.4513 |
| 5401 | GARS Glycyl-tRNA synthetase                                                     | IP100783097,IP100915808                         | 83,123.50  | 465 | 474 | SCYDLSCHAR                           | R | A | 1,268.51 |
| 5402 | TKT cDNA FLJ54957, highly similar to Transketolase                              | IP100643920                                     | 68,725.40  | 465 | 473 | AVELAANTK                            | K | G | 916.5098 |
| 5403 | GATAD2A Isoform 1 of Transcriptional repressor p66-alpha                        | IP100410330,IP100444526,IP100478128             | 68,044.80  | 465 | 475 | ALQQEQEIEQR                          | K | L | 1,371.69 |
| 5404 | UHRF1 ubiquitin-like with PHD and ring finger domains 1 isoform 2               | IP100797279,IP100797945                         | 91,082.30  | 466 | 497 | SNDGAYSLVLAGGYEDDVDH<br>GNFFTYTGSGGR | R | D | 3,341.46 |
| 5405 | HSPA5 HSPA5 protein                                                             | IP100003362                                     | 72,405.60  | 466 | 475 | VYEGERPLTK                           | K | D | 1,191.64 |
| 5406 | DDX17 DEAD box polypeptide 17 isoform 1                                         | IP100023785,IP100651653                         | 80,256.00  | 466 | 480 | SGKAPILIATDVASR                      | R | G | 1,498.86 |
| 5407 | XRCC5 ATP-dependent DNA helicase 2 subunit 2                                    | IP100220834,IP100871391                         | 82,689.10  | 466 | 481 | KDEKTDLTLEDLFPPTK                    | K | I | 1,880.95 |
| 5408 | JUP Junction plakoglobin                                                        | IP100554711                                     | 81,727.90  | 466 | 477 | HPEAEMAQNSVR                         | R | L | 1,384.63 |
| 5409 | CTPS CTP synthase 1                                                             | IP100290142                                     | 66,672.70  | 467 | 477 | LYGDADYLEER                          | K | H | 1,343.61 |
| 5410 | GPI Glucose-6-phosphate isomerase                                               | IP100027497                                     | 63,130.40  | 467 | 481 | VFEGNRPTNSIVFTK                      | K | L | 1,708.90 |
| 5411 | CCT8 T-complex protein 1 subunit theta                                          | IP100784090                                     | 59,603.00  | 467 | 476 | LYAVHQEGNK                           | K | N | 1,158.59 |
| 5412 | PDE12 Isoform 1 of 2',5'-phosphodiesterase 12                                   | IP100174390,IP100886797                         | 67,333.70  | 468 | 479 | LIQMAVALAHIR                         | R | H | 1,335.79 |
| 5413 | HSP90AA1 heat shock protein 90kDa alpha (cytosolic), class A member 1 isoform 1 | IP100382470,IP100784295                         | 98,147.10  | 468 | 477 | RAPFDLFENR                           | R | K | 1,264.64 |
| 5414 | GATAD2B Transcriptional repressor p66-beta                                      | IP100103554                                     | 65,243.70  | 468 | 478 | ALQQEQEIEQR                          | K | L | 1,371.69 |
| 5415 | ATP2A2 Isoform SERCA2A of Sarcoplasmic/endoplasmic reticulum calcium ATPase 2   | IP100177817,IP100219078,IP100747443             | 109,674.90 | 468 | 476 | ANACNSVIK                            | R | Q | 976.488  |
| 5416 | MARS Methionyl-tRNA synthetase, cytoplasmic                                     | IP100008240                                     | 101,099.50 | 468 | 483 | TLPGSDWTPNAQFTR                      | R | S | 1,803.90 |
| 5417 | DDX17 DEAD box polypeptide 17 isoform 1                                         | IP100023785,IP100651653                         | 80,256.00  | 469 | 480 | APILIATDVASR                         | K | G | 1,226.71 |
| 5418 | DDX17 DEAD box polypeptide 17 isoform 1                                         | IP100023785,IP100651653                         | 80,256.00  | 469 | 480 | APILIATDVASR                         | K | G | 1,226.71 |
| 5419 | FASN Fatty acid synthase                                                        | IP100026781                                     | 273,382.00 | 469 | 477 | GYAVLGGER                            | R | G | 921.4789 |
| 5420 | TCP1 T-complex protein 1 subunit alpha                                          | IP100290566                                     | 60,327.20  | 469 | 480 | AFHNEAQVNPER                         | R | K | 1,411.67 |
| 5421 | HSP90AA1 heat shock protein 90kDa alpha (cytosolic), class A member 1 isoform 1 | IP100382470,IP100784295                         | 98,147.10  | 469 | 477 | APFDLFENR                            | R | K | 1,108.54 |
| 5422 | TCP1 T-complex protein 1 subunit alpha                                          | IP100290566                                     | 60,327.20  | 469 | 481 | AFHNEAQVNPERK                        | R | N | 1,539.77 |
| 5423 | HSPA9 Stress-70 protein, mitochondrial                                          | IP100007765                                     | 73,663.30  | 469 | 485 | SQVFSTAADGQTQVEIK                    | K | V | 1,808.90 |
| 5424 | SRP54 Signal recognition particle 54 kDa protein                                | IP100009822                                     | 55,688.30  | 470 | 485 | VLHHMGGMAGLQSMRR                     | R | Q | 1,819.81 |
| 5425 | DDX5 Probable ATP-dependent RNA helicase DDX5                                   | IP100017617                                     | 69,131.70  | 471 | 478 | LLQLVEDR                             | K | G | 985.5678 |
| 5426 | DDX5 Probable ATP-dependent RNA helicase DDX5                                   | IP100017617                                     | 69,131.70  | 471 | 478 | LLQLVEDR                             | K | G | 985.5678 |



|      |                                                                       |                                                 |            |     |     |                                                                         |             |             |                                  |
|------|-----------------------------------------------------------------------|-------------------------------------------------|------------|-----|-----|-------------------------------------------------------------------------|-------------|-------------|----------------------------------|
| 5427 | HSPD1 60 kDa heat shock protein, mitochondrial                        | IPI00784154                                     | 61,037.70  | 471 | 481 | TLKIPAMTIK                                                              | R           | N           | 1,186.72                         |
| 5428 | TRIM28 Isoform 1 of Transcription intermediary factor 1-beta          | IPI00438229,IPI00438230                         | 88,531.00  | 473 | 483 | SGEGEVSGLMR                                                             | R           | K           | 1,137.52                         |
| 5429 | TTL12 Tubulin--tyrosine ligase-like protein 12                        | IPI00029048,IPI00879002                         | 74,385.70  | 473 | 478 | YIVLLR                                                                  | R           | S           | 776.5029                         |
| 5430 | LCP1 Plastin-2                                                        | IPI00010471                                     | 70,274.10  | 473 | 488 | FSLVGIGGQDLNEG NR                                                       | K           | T           | 1,675.84                         |
| 5431 | LRRC40 Leucine-rich repeat-containing protein 40                      | IPI00152998                                     | 68,236.30  | 474 | 480 | LTFDLR                                                                  | K           | N           | 877.5143                         |
| 5432 | CKAP4 Isoform 1 of Cytoskeleton-associated protein 4                  | IPI00141318,IPI00604713                         | 66,004.20  | 474 | 491 | SLGETQLVLYGDVEELKR                                                      | R           | S           | 2,049.09                         |
| 5433 | RPA1 Replication protein A 70 kDa DNA-binding subunit                 | IPI00020127                                     | 68,121.00  | 474 | 489 | ENCMYQACPTQDCNKK                                                        | K           | V           | 2,046.81                         |
| 5434 | IGF2BP2 insulin-like growth factor 2 mRNA binding protein 2 isoform a | IPI00179713,IPI00180983,IPI00743914             | 66,104.40  | 475 | 487 | MVIITGPPEAQFK                                                           | R           | A           | 1,446.77                         |
| 5435 | - cDNA FLJ54554, highly similar to Pyruvate kinase isozymes M1/M2     | IPI00910979                                     | 56,255.30  | 475 | 483 | VNFAMNVGK                                                               | R           | A           | 995.4979                         |
| 5436 | ILF3 Isoform 1 of Interleukin enhancer-binding factor 3               | IPI00298788                                     | 95,320.90  | 475 | 523 | DSSKGEDSAEETEAKPAVVAP<br>APVVEAVSTPSAAFPDATAE<br>QGPILTK<br>GQLESIVENIR | R<br>R<br>K | H<br>H<br>I | 4,852.39<br>4,852.39<br>1,257.68 |
| 5437 | PFKL Isoform 1 of 6-phosphofructokinase, liver type                   | IPI00332371,IPI00902982                         | 85,001.20  | 475 | 485 | GQLESIVENIR                                                             | K           | I           | 1,257.68                         |
| 5438 | XRCC6 ATP-dependent DNA helicase 2 subunit 1                          | IPI00644712                                     | 69,828.40  | 475 | 488 | SDSFENPVLQQHFR                                                          | R           | N           | 1,703.81                         |
| 5439 | GARS Glycyl-tRNA synthetase                                           | IPI00783097,IPI00915808                         | 83,123.50  | 475 | 490 | ATKVPLVAEKPLKEPK                                                        | R           | T           | 1,748.07                         |
| 5440 | GARS Glycyl-tRNA synthetase                                           | IPI00783097,IPI00915808                         | 83,123.50  | 475 | 490 | ATKVPLVAEKPLKEPK                                                        | R           | T           | 1,748.07                         |
| 5441 | GATAD2A Isoform 1 of Transcriptional repressor p66-alpha              | IPI00410330,IPI00444526,IPI00478128             | 68,044.80  | 476 | 487 | LLQQGTAPAQAK                                                            | R           | A           | 1,225.69                         |
| 5442 | TOP2A Isoform 3 of DNA topoisomerase 2-alpha                          | IPI00218753,IPI00414101,IPI00478232,IPI00879004 | 178,700.70 | 477 | 486 | LDDANDAGGR                                                              | K           | N           | 1,003.44                         |
| 5443 | AARS Alanyl-tRNA synthetase, cytoplasmic                              | IPI00027442,IPI00910701                         | 106,795.20 | 477 | 486 | GLEVTDDSPK                                                              | R           | Y           | 1,060.52                         |
| 5444 | CDC5L Cell division cycle 5-like protein                              | IPI00465294,IPI00909093                         | 92,236.10  | 478 | 487 | LGLLGLPAPK                                                              | R           | N           | 978.6349                         |
| 5445 | NAMPT Isoform 1 of Nicotinamide phosphoribosyltransferase             | IPI00018873                                     | 55,504.50  | 479 | 491 | NAQLNIELEAAHH                                                           | K           | -           | 1,459.73                         |
| 5446 | HNRNPM Isoform 1 of Heterogeneous nuclear ribonucleoprotein M         | IPI00171903,IPI00383296                         | 77,499.30  | 479 | 485 | IGSGVER                                                                 | R           | M           | 717.389                          |
| 5447 | GATAD2B Transcriptional repressor p66-beta                            | IPI00103554                                     | 65,243.70  | 479 | 498 | LQQQAALSPTTAPAVSSVSK                                                    | R           | Q           | 1,984.07                         |
| 5448 | COPG Coatomer subunit gamma                                           | IPI00783982                                     | 97,701.40  | 480 | 488 | VVLEHEEVR                                                               | R           | A           | 1,109.59                         |
| 5449 | COPG2 Coatomer subunit gamma-2                                        | IPI00002557                                     | 97,606.50  | 480 | 488 | VVLENEAVR                                                               | R           | A           | 1,028.57                         |
| 5450 | ADD1 Isoform 1 of Alpha-adducin                                       | IPI00019901,IPI00220158,IPI00376220             | 80,937.90  | 480 | 497 | TSTSAVPNLFVPLNTNPK                                                      | R           | E           | 1,900.02                         |
| 5451 | DDX52 Probable ATP-dependent RNA helicase DDX52                       | IPI00032423                                     | 67,450.30  | 480 | 499 | GVNLVINYDFPTSSVEYIHR                                                    | K           | I           | 2,323.17                         |
| 5452 | HSD17B4 Peroxisomal multifunctional enzyme type 2                     | IPI00019912                                     | 79,670.40  | 480 | 506 | VAVAIIPNRPPDAVLTDTTSLNQ<br>AALYR                                        | K<br>R      | L<br>V      | 2,866.54<br>2,508.21             |
| 5453 | TKT cDNA FLJ54957, highly similar to Transketolase                    | IPI00643920                                     | 68,725.40  | 480 | 501 | TSRPENAIYNNNEDFQVGQA<br>K                                               | R<br>K      | V<br>W      | 2,508.21<br>1,762.78             |
| 5454 | SFPQ Isoform Long of Splicing factor, proline- and glutamine-rich     | IPI00010740                                     | 76,131.50  | 480 | 493 | FAQHGTFEYEYSQR                                                          | R           | W           | 1,762.78                         |
| 5455 | HSPD1 60 kDa heat shock protein, mitochondrial                        | IPI00784154                                     | 61,037.70  | 482 | 493 | NAGVEGSLIVEK                                                            | K           | I           | 1,215.66                         |
| 5456 | GTF3C3 Isoform 1 of General transcription factor 3C polypeptide 3     | IPI00015806                                     | 101,258.20 | 482 | 493 | VVDLAPLHLDAR                                                            | K           | I           | 1,318.75                         |
| 5457 | PABPC1 Isoform 1 of Polyadenylate-binding protein 1                   | IPI00008524                                     | 70,653.30  | 482 | 506 | VANTSTQTMGPRPAAAAAAA<br>TPAVR                                           | R<br>K      | T<br>V      | 2,397.23<br>2,391.18             |
| 5458 | HSP90AB1 Heat shock protein HSP 90-beta                               | IPI00414676                                     | 83,249.30  | 482 | 502 | SIYYITGESKEQVANSFVER                                                    | K           | V           | 2,391.18                         |
| 5459 | EEF2 Elongation factor 2                                              | IPI00186290                                     | 95,322.10  | 482 | 495 | TGTITTFEHAHNMR                                                          | K           | V           | 1,615.76                         |
| 5460 | GNL3L Guanine nucleotide-binding protein-like 3-like protein          | IPI00005132,IPI00871959                         | 65,555.30  | 483 | 495 | IGDLTGYCTNPNR                                                           | K           | H           | 1,480.69                         |
| 5461 | RARS Isoform Complexed of Arginyl-tRNA synthetase, cytoplasmic        | IPI00004860                                     | 75,364.00  | 483 | 504 | DKVLTAEELNAAQTSVAYGCI<br>K                                              | R<br>K      | Y<br>V      | 2,381.20<br>1,253.68             |
| 5462 | USP14 Ubiquitin carboxyl-terminal hydrolase 14                        | IPI00219913,IPI00640357,IPI00871297,IPI00872664 | 56,052.30  | 484 | 494 | RVEIMEESEQ                                                              | R           | -           | 1,394.61                         |
| 5463 | IGF2BP1 Insulin-like growth factor 2 mRNA-binding protein 1           | IPI00008557                                     | 63,438.30  | 484 | 493 | EEVKLETHIR                                                              | K           | V           | 1,253.68                         |
| 5464 | MAGED2 Isoform 1 of Melanoma-associated antigen D2                    | IPI00009542,IPI00337823,IPI00477809             | 64,938.00  | 485 | 494 | AAEAEEAEAK                                                              | K           | A           | 902.4577                         |

|      |                                                                                                  |                         |            |     |     |                            |   |   |          |
|------|--------------------------------------------------------------------------------------------------|-------------------------|------------|-----|-----|----------------------------|---|---|----------|
| 5465 | - cDNA FLJ54408, highly similar to Heat shock 70 kDa protein 1                                   | IPI00911039             | 63,907.90  | 485 | 495 | NALESYAFNMK                | K | S | 1,287.60 |
| 5466 | RARS Isoform Complexed of Arginyl-tRNA synthetase, cytoplasmic                                   | IPI00004860             | 75,364.00  | 485 | 504 | VLTAEEELNAAQTSVAYGCIK      | K | Y | 2,138.08 |
| 5467 | HNRNPM Isoform 1 of Heterogeneous nuclear ribonucleoprotein M                                    | IPI00171903,IPI00383296 | 77,499.30  | 486 | 496 | MGAGMGFGLER                | R | M | 1,157.51 |
| 5468 | CPNE8 cDNA FLJ25727 fis, clone TST05479                                                          | IPI00334276,IPI00384746 | 62,217.10  | 487 | 495 | DIVQFVPPFR                 | R | D | 1,120.62 |
| 5469 | PFKP 6-phosphofructokinase type C                                                                | IPI00009790             | 85,579.40  | 487 | 496 | YLEEIATQMR                 | K | T | 1,253.62 |
| 5470 | EHD1 EH domain-containing protein 1                                                              | IPI00017184             | 60,611.10  | 487 | 509 | LADVDDKDGLLDDEEFALANHL IK  | K | V | 2,554.30 |
| 5471 | KPNA2;LOC728860 Importin subunit alpha-2                                                         | IPI00002214,IPI00789457 | 57,844.50  | 487 | 494 | ASLSLIEK                   | K | Y | 860.5088 |
| 5472 | KIF2C Isoform 1 of Kinesin-like protein KIF2C                                                    | IPI00290435,IPI00645758 | 81,296.50  | 488 | 498 | FSLVDLAGNER                | K | G | 1,220.63 |
| 5473 | TRIM28 Isoform 1 of Transcription intermediary factor 1-beta                                     | IPI00438229,IPI00438230 | 88,531.00  | 488 | 507 | VSLERLDDLTLADSQPPVFK       | R | V | 2,243.19 |
| 5474 | COPG2 Coatomer subunit gamma-2                                                                   | IPI00002557             | 97,606.50  | 489 | 497 | AAAVSALAK                  | R | F | 801.4828 |
| 5475 | DDX3X ATP-dependent RNA helicase DDX3X                                                           | IPI00215637             | 73,227.70  | 489 | 503 | SGKSPILVATAVAAR            | R | G | 1,440.85 |
| 5476 | STIP1 Stress-induced-phosphoprotein 1                                                            | IPI00013894,IPI00871856 | 62,624.10  | 489 | 505 | AMADPEVQQIMSDPAMR          | R | L | 1,889.86 |
| 5477 | MTHFD1 C-1-tetrahydrofolate synthase, cytoplasmic                                                | IPI00218342,IPI00794900 | 101,543.50 | 489 | 495 | FSDIQIR                    | R | R | 878.4731 |
| 5478 | OXSRI Serine/threonine-protein kinase OSR1                                                       | IPI00010080             | 58,005.40  | 489 | 497 | IVEEPQSNR                  | K | S | 1,071.54 |
| 5479 | EIF3L Eukaryotic translation initiation factor 3, subunit E interacting protein                  | IPI00465233,IPI00745266 | 70,886.50  | 489 | 504 | VFSDEVQQQAQLSTIR           | K | S | 1,848.95 |
| 5480 | TOP1 DNA topoisomerase 1                                                                         | IPI00413611             | 90,711.70  | 489 | 508 | AGNEKEEGETADTVGCCSLR       | R | V | 2,182.93 |
| 5481 | XRCC5 ATP-dependent DNA helicase 2 subunit 2                                                     | IPI00220834,IPI00871391 | 82,689.10  | 490 | 497 | LFQCLLHR                   | R | A | 1,086.59 |
| 5482 | PKM2 Isoform M1 of Pyruvate kinase isozymes M1/M2                                                | IPI00220644,IPI00479186 | 58,044.60  | 490 | 498 | VNFAMNVGK                  | R | A | 995.4979 |
| 5483 | RPA1 Replication protein A 70 kDa DNA-binding subunit                                            | IPI00020127             | 68,121.00  | 490 | 499 | VIDQQNGLYR                 | K | C | 1,205.63 |
| 5484 | CCT4 T-complex protein 1 subunit delta                                                           | IPI00302927,IPI00873222 | 57,907.90  | 490 | 496 | TAGINVR                    | K | K | 730.4206 |
| 5485 | QRICH1 Glutamine-rich protein 1                                                                  | IPI00328200             | 86,415.20  | 490 | 500 | NAELEKDAQNR                | K | L | 1,287.63 |
| 5486 | KIFC1 Kinesin-like protein KIFC1                                                                 | IPI00306400             | 73,730.10  | 490 | 503 | AGPGSEELVTNAR              | R | Y | 1,401.70 |
| 5487 | LMNA Isoform A of Lamin-A/C                                                                      | IPI00021405             | 74,122.60  | 491 | 515 | AGQVVTIWAAGAGATHSPPT DLVWK | K | A | 2,533.32 |
| 5488 | GARS Glycyl-tRNA synthetase                                                                      | IPI00783097,IPI00915808 | 83,123.50  | 491 | 501 | TVNVVQFEPESK               | K | G | 1,247.66 |
| 5489 | DDX3X ATP-dependent RNA helicase DDX3X                                                           | IPI00215637             | 73,227.70  | 492 | 503 | SPILVATAVAAR               | K | G | 1,168.70 |
| 5490 | HSP90AB1 Heat shock protein HSP 90-beta                                                          | IPI00414676             | 83,249.30  | 492 | 502 | EQVANSAFVER                | K | V | 1,249.62 |
| 5491 | HSP90AB1 Heat shock protein HSP 90-beta                                                          | IPI00414676             | 83,249.30  | 492 | 502 | EQVANSAFVER                | K | V | 1,249.62 |
| 5492 | HSP90AB1 Heat shock protein HSP 90-beta                                                          | IPI00414676             | 83,249.30  | 492 | 502 | EQVANSAFVER                | K | V | 1,249.62 |
| 5493 | TRIM28 Isoform 1 of Transcription intermediary factor 1-beta                                     | IPI00438229,IPI00438230 | 88,531.00  | 493 | 507 | LDLTLADSQPPVFK             | R | V | 1,658.86 |
| 5494 | MCM2 DNA replication licensing factor MCM2                                                       | IPI00184330             | 101,880.10 | 494 | 505 | GLALALFGGEPK               | R | N | 1,172.67 |
| 5495 | IGF2BP3 Isoform 1 of Insulin-like growth factor 2 mRNA-binding protein 3                         | IPI00658000             | 63,702.90  | 494 | 501 | VPSFAAGR                   | R | V | 804.4362 |
| 5496 | SFPQ Isoform Long of Splicing factor, proline- and glutamine-rich                                | IPI00010740             | 76,131.50  | 496 | 505 | SLDEMEKQQR                 | K | E | 1,279.59 |
| 5497 | - cDNA FLJ54408, highly similar to Heat shock 70 kDa protein 1                                   | IPI00911039             | 63,907.90  | 496 | 504 | SAVEDEGLK                  | K | G | 947.4681 |
| 5498 | - cDNA FLJ54408, highly similar to Heat shock 70 kDa protein 1                                   | IPI00911039             | 63,907.90  | 496 | 506 | SAVEDEGLKGGK               | K | I | 1,132.58 |
| 5499 | PFKM cDNA FLJ44241 fis, clone THYMU3008436, highly similar to 6-phosphofructokinase, muscle type | IPI00465179,IPI00743142 | 93,203.30  | 496 | 503 | IGLIQGNR                   | R | V | 870.5157 |
| 5500 | MATR3 Matrin-3                                                                                   | IPI00017297,IPI00789551 | 94,608.70  | 497 | 515 | VIHLSNLPHSGYSDSAVLK        | R | L | 2,037.08 |
| 5501 | TCP1 T-complex protein 1 subunit alpha                                                           | IPI00290566             | 60,327.20  | 497 | 510 | DNKQAGVFPEPTIVK            | R | V | 1,545.83 |
| 5502 | HNRNPM Isoform 1 of Heterogeneous nuclear ribonucleoprotein M                                    | IPI00171903,IPI00383296 | 77,499.30  | 497 | 503 | MAAPIDR                    | R | V | 773.3975 |
| 5503 | ACTN4 Alpha-actinin-4                                                                            | IPI00013808             | 104,839.20 | 498 | 512 | ICDQWDALGSLTHSR            | K | R | 1,758.82 |

|      |                                                                                                  |                                                 |            |     |     |                              |   |   |          |
|------|--------------------------------------------------------------------------------------------------|-------------------------------------------------|------------|-----|-----|------------------------------|---|---|----------|
| 5504 | RRM1 Ribonucleoside-diphosphate reductase large subunit                                          | IPI00013871                                     | 90,055.50  | 498 | 516 | HRPIGIGVQGLADAFILMR          | R | Y | 2,080.15 |
| 5505 | ATP6V1A V-type proton ATPase catalytic subunit A                                                 | IPI00007682                                     | 68,287.40  | 499 | 513 | ASLAETDKITLEVAK              | K | L | 1,588.88 |
| 5506 | PSMD3 26S proteasome non-ATPase regulatory subunit 3                                             | IPI00011603                                     | 60,961.60  | 500 | 511 | SYNKDLESAEER                 | K | R | 1,440.66 |
| 5507 | CCT7 T-complex protein 1 subunit eta                                                             | IPI00018465                                     | 59,349.80  | 500 | 524 | INALTAASEAACLIVSVDETIKN PR   | R | S | 2,656.40 |
| 5508 | RANGAP1 Ran GTPase-activating protein 1                                                          | IPI00294879                                     | 63,525.30  | 501 | 515 | AFNSSSFNSNTFLTR              | K | L | 1,692.80 |
| 5509 | HSPA8 Isoform 1 of Heat shock cognate 71 kDa protein                                             | IPI00003865                                     | 70,881.80  | 501 | 509 | ITITNDKGR                    | K | L | 1,017.57 |
| 5510 | HSPA1A;HSPA1B Heat shock 70 kDa protein 1                                                        | IPI00304925                                     | 70,036.00  | 501 | 509 | ITITNDKGR                    | K | L | 1,017.57 |
| 5511 | TMPO Lamina-associated polypeptide 2, isoform alpha                                              | IPI00216230                                     | 75,475.80  | 501 | 511 | VIEEWWQQVDR                  | K | Q | 1,430.69 |
| 5512 | HNRNPUL1 Isoform 1 of Heterogeneous nuclear ribonucleoprotein U-like protein 1                   | IPI00013070,IPI00167147                         | 95,721.70  | 501 | 515 | NYILDQTNVYGSAQR              | R | R | 1,741.85 |
| 5513 | LCP1 Plastin-2                                                                                   | IPI00010471                                     | 70,274.10  | 502 | 515 | YTLNILEEIGGGQK               | R | V | 1,534.81 |
| 5514 | TOP2A Isoform 3 of DNA topoisomerase 2-alpha                                                     | IPI00218753,IPI00414101,IPI00478232,IPI00879004 | 178,700.70 | 503 | 514 | TLAVSGLGVVGR                 | K | D | 1,128.67 |
| 5515 | TOP2A Isoform 3 of DNA topoisomerase 2-alpha                                                     | IPI00218753,IPI00414101,IPI00478232,IPI00879004 | 178,700.70 | 503 | 514 | TLAVSGLGVVGR                 | K | D | 1,128.67 |
| 5516 | CORO1C Coronin-1C_i3 protein                                                                     | IPI00867509                                     | 58,930.80  | 503 | 514 | SIKDTICNQDER                 | K | I | 1,478.69 |
| 5517 | CORO1C Coronin-1C_i3 protein                                                                     | IPI00867509                                     | 58,930.80  | 503 | 514 | SIKDTICNQDER                 | K | I | 1,478.69 |
| 5518 | PFKM cDNA FLJ44241 fis, clone THYMU3008436, highly similar to 6-phosphofructokinase, muscle type | IPI00465179,IPI00743142                         | 93,203.30  | 504 | 516 | VLVVDHGFEGFLAK               | R | G | 1,383.76 |
| 5519 | HNRNPM Isoform 1 of Heterogeneous nuclear ribonucleoprotein M                                    | IPI00171903,IPI00383296                         | 77,499.30  | 504 | 510 | VGQTIER                      | R | M | 802.4418 |
| 5520 | PLS3 plastin 3                                                                                   | IPI00216694                                     | 70,795.90  | 505 | 518 | YTLNVLEDLGDGQK               | R | A | 1,564.79 |
| 5521 | EIF4G2 cDNA FLJ59571, highly similar to Eukaryotic translation initiation factor 4gamma 2        | IPI00015952                                     | 110,247.70 | 505 | 528 | SQGLSQLYHNQSQGLLSQLQ         | K | D | 2,629.33 |
| 5522 | HSP90AB1 Heat shock protein HSP 90-beta                                                          | IPI00414676                                     | 83,249.30  | 505 | 526 | GQSK<br>KRGFEVVMTEPIDEYCVQQ  | R | E | 2,732.34 |
| 5523 | MTHFD1 C-1-tetrahydrofolate synthase, cytoplasmic                                                | IPI00218342,IPI00794900                         | 101,543.50 | 505 | 517 | LK<br>TDPPTLTDEEINR          | K | F | 1,504.71 |
| 5524 | RARS Isoform Complexed of Arginyl-tRNA synthetase, cytoplasmic                                   | IPI00004860                                     | 75,364.00  | 505 | 512 | YADLSHNR                     | K | L | 975.4642 |
| 5525 | TARS Threonyl-tRNA synthetase, cytoplasmic                                                       | IPI00329633,IPI00908949                         | 83,419.80  | 505 | 517 | FLGDIEVWDQAEK                | K | Q | 1,549.75 |
| 5526 | TKT cDNA FLJ54957, highly similar to Transketolase                                               | IPI00643920                                     | 68,725.40  | 506 | 532 | SKDDQVTVIGAGVTLHEALAA        | K | E | 2,777.54 |
| 5527 | LAP3 Isoform 1 of Cytosol aminopeptidase                                                         | IPI00419237,IPI00789806                         | 56,149.70  | 506 | 513 | AELLKK<br>TLIEFLLR           | R | F | 1,004.61 |
| 5528 | CKAP4 Isoform 1 of Cytoskeleton-associated protein 4                                             | IPI00141318,IPI00604713                         | 66,004.20  | 506 | 523 | VQEQVHTLLSQDQAQAAR           | K | L | 2,022.04 |
| 5529 | HSP90AB1 Heat shock protein HSP 90-beta                                                          | IPI00414676                                     | 83,249.30  | 507 | 526 | GFEVVMTEPIDEYCVQQLK          | R | E | 2,464.14 |
| 5530 | CCT3 chaperonin containing TCP1, subunit 3 isoform b                                             | IPI00290770,IPI00553185                         | 60,446.30  | 507 | 517 | TAVETAVLLLR                  | K | I | 1,185.72 |
| 5531 | CCT3 chaperonin containing TCP1, subunit 3 isoform b                                             | IPI00290770,IPI00553185                         | 60,446.30  | 507 | 517 | TAVETAVLLLR                  | K | I | 1,185.72 |
| 5532 | JUP Junction plakoglobin                                                                         | IPI00554711                                     | 81,727.90  | 507 | 526 | NLALCPANHAPLQEAIVPR          | R | L | 2,155.14 |
| 5533 | EEF2 Elongation factor 2                                                                         | IPI00186290                                     | 95,322.10  | 507 | 519 | VAVEAKNPADLPK                | R | L | 1,351.76 |
| 5534 | HSP90AB1 Heat shock protein HSP 90-beta                                                          | IPI00414676                                     | 83,249.30  | 507 | 531 | GFEVVMTEPIDEYCVQQLK<br>EFDGK | R | S | 3,040.40 |
| 5535 | NARS Asparaginyl-tRNA synthetase, cytoplasmic                                                    | IPI00306960                                     | 62,926.20  | 508 | 522 | YGTCPHGGYGLGLER              | K | F | 1,636.75 |
| 5536 | TRIM28 Isoform 1 of Transcription intermediary factor 1-beta                                     | IPI00438229,IPI00438230                         | 88,531.00  | 508 | 524 | VFPGSTTEDYNLIVIER            | K | G | 1,953.00 |
| 5537 | IGF2BP3 Isoform 1 of Insulin-like growth factor 2 mRNA-binding protein 3                         | IPI00658000                                     | 63,702.90  | 509 | 525 | TVNELQNLSSAEVVVPR            | K | D | 1,854.99 |
| 5538 | IGF2BP1 Insulin-like growth factor 2 mRNA-binding protein 1                                      | IPI00008557                                     | 63,438.30  | 509 | 525 | TVNELQNLTAEEVVVPR            | K | D | 1,853.01 |
| 5539 | HSP90AA1 heat shock protein 90kDa alpha (cytosolic), class A member 1 isoform 1                  | IPI00382470,IPI00784295                         | 98,147.10  | 509 | 522 | GVVDSDELPLNISR               | R | E | 1,513.79 |
| 5540 | HSP90AA1 heat shock protein 90kDa alpha (cytosolic), class A member 1 isoform 1                  | IPI00382470,IPI00784295                         | 98,147.10  | 509 | 522 | GVVDSDELPLNISR               | R | E | 1,513.79 |

|      |                                                                                 |                                                                                                                                                                                                                                                                        |            |     |     |                        |   |   |          |
|------|---------------------------------------------------------------------------------|------------------------------------------------------------------------------------------------------------------------------------------------------------------------------------------------------------------------------------------------------------------------|------------|-----|-----|------------------------|---|---|----------|
| 5541 | HNRNPUL2 Heterogeneous nuclear ribonucleoprotein U-like protein 2               | IP100456887                                                                                                                                                                                                                                                            | 85,087.20  | 509 | 521 | DLLVQQASQCLSK          | R | L | 1,489.77 |
| 5542 | CXorf15 Gamma-taxilin                                                           | IP100019994                                                                                                                                                                                                                                                            | 60,568.50  | 510 | 528 | SAVQKPPSTGSAPAIESVD    | R | - | 1,840.93 |
| 5543 | ZGPAT Isoform 1 of Zinc finger CCCH-type with G patch domain-containing protein | IP100553175,IP100641397,IP100719070                                                                                                                                                                                                                                    | 57,340.70  | 510 | 520 | AQEAGLQQEQR            | R | K | 1,257.62 |
| 5544 | HSPA8 Isoform 1 of Heat shock cognate 71 kDa protein                            | IP100003865                                                                                                                                                                                                                                                            | 70,881.80  | 510 | 517 | LSKEDIER               | R | M | 989.5263 |
| 5545 | HSPA1A;HSPA1B Heat shock 70 kDa protein 1                                       | IP100304925                                                                                                                                                                                                                                                            | 70,036.00  | 510 | 517 | LSKEEIER               | R | M | 1,003.54 |
| 5546 | ACACA Isoform 1 of Acetyl-CoA carboxylase 1                                     | IP100011569,IP100396015,IP100396018,IP100793409,IP100847501                                                                                                                                                                                                            | 265,538.40 | 510 | 532 | ITSENPDGEGFKPSSGTVQELN | R | S | 2,552.23 |
| 5547 | CCT8 T-complex protein 1 subunit theta                                          | IP100784090                                                                                                                                                                                                                                                            | 59,603.00  | 510 | 520 | LATNAAVTVLR            | K | V | 1,128.67 |
| 5548 | RDX Radixin, isoform CRA_a                                                      | IP100017367,IP100903145                                                                                                                                                                                                                                                | 71,032.60  | 510 | 523 | SEEEVRTETQKNER         | R | V | 1,734.83 |
| 5549 | DDX3X ATP-dependent RNA helicase DDX3X                                          | IP100215637                                                                                                                                                                                                                                                            | 73,227.70  | 512 | 528 | HVINFDLPSDIEEYVHR      | K | I | 2,083.02 |
| 5550 | HSP90B1 Endoplasmic                                                             | IP100027230                                                                                                                                                                                                                                                            | 92,453.70  | 512 | 530 | FQSSHPTDITSLDQYVER     | R | M | 2,260.06 |
| 5551 | DDX52 Probable ATP-dependent RNA helicase DDX52                                 | IP100032423                                                                                                                                                                                                                                                            | 67,450.30  | 512 | 525 | AITFFTEDDKPLLR         | K | S | 1,665.88 |
| 5552 | XPNPEP1 Isoform 2 of Xaa-Pro aminopeptidase 1                                   | IP100607814,IP100645898,IP100793375                                                                                                                                                                                                                                    | 67,210.10  | 512 | 522 | IENVVLVVPVK            | R | T | 1,208.76 |
| 5553 | TCP1 T-complex protein 1 subunit alpha                                          | IP100290566                                                                                                                                                                                                                                                            | 60,327.20  | 513 | 526 | SLKFATEAAITILR         | K | I | 1,533.90 |
| 5554 | EEF2 Elongation factor 2                                                        | IP100186290                                                                                                                                                                                                                                                            | 95,322.10  | 513 | 519 | NPADLPK                | K | L | 754.4095 |
| 5555 | RARS Isoform Complexed of Arginyl-tRNA synthetase, cytoplasmic                  | IP100004860                                                                                                                                                                                                                                                            | 75,364.00  | 513 | 522 | LNDYIFSFDK             | R | M | 1,261.61 |
| 5556 | TCP1 T-complex protein 1 subunit alpha                                          | IP100290566                                                                                                                                                                                                                                                            | 60,327.20  | 516 | 526 | FATEAAITILR            | K | I | 1,205.69 |
| 5557 | LMNA Isoform A of Lamin-A/C                                                     | IP100021405                                                                                                                                                                                                                                                            | 74,122.60  | 516 | 527 | AQNTWGCNLSLR           | K | T | 1,363.62 |
| 5558 | DDX5 Probable ATP-dependent RNA helicase DDX5                                   | IP100017617                                                                                                                                                                                                                                                            | 69,131.70  | 517 | 524 | GYSSLLKR               | R | D | 923.5309 |
| 5559 | HNRNPU heterogeneous nuclear ribonucleoprotein U isoform a                      | IP100644079                                                                                                                                                                                                                                                            | 90,567.20  | 517 | 536 | HAAENPGKYNILGTNTIMDK   | K | M | 2,187.09 |
| 5560 | RRM1 Ribonucleoside-diphosphate reductase large subunit                         | IP100013871                                                                                                                                                                                                                                                            | 90,055.50  | 517 | 529 | YPFESAEQLLNK           | R | Q | 1,509.76 |
| 5561 | HSPA8 Isoform 1 of Heat shock cognate 71 kDa protein                            | IP100003865                                                                                                                                                                                                                                                            | 70,881.80  | 518 | 526 | MVQEAKEYK              | R | A | 1,141.56 |
| 5562 | HSPA1A;HSPA1B Heat shock 70 kDa protein 1                                       | IP100304925                                                                                                                                                                                                                                                            | 70,036.00  | 518 | 526 | MVQEAKEYK              | R | A | 1,141.56 |
| 5563 | HSPA1A;HSPA1B Heat shock 70 kDa protein 1                                       | IP100304925                                                                                                                                                                                                                                                            | 70,036.00  | 518 | 533 | MVQEAKEYKAEDEVQR       | R | E | 1,952.94 |
| 5564 | RBM14;RBM4 Isoform 1 of RNA-binding protein 14                                  | IP100013174                                                                                                                                                                                                                                                            | 69,474.30  | 518 | 541 | TQSSASLAASYAAQQHPQAA   | R | G | 2,465.18 |
| 5565 | CCT3 chaperonin containing TCP1, subunit 3 isoform b                            | IP100290770,IP100553185                                                                                                                                                                                                                                                | 60,446.30  | 518 | 526 | IDDIVSGHK              | R | K | 983.5158 |
| 5566 | HNRNPUL1 Isoform 1 of Heterogeneous nuclear ribonucleoprotein U-like protein 1  | IP100013070,IP100167147                                                                                                                                                                                                                                                | 95,721.70  | 518 | 526 | MRPFEGFQR              | K | K | 1,183.57 |
| 5567 | AIFM1 Isoform 1 of Apoptosis-inducing factor 1, mitochondrial                   | IP100000690,IP100157908                                                                                                                                                                                                                                                | 66,883.50  | 519 | 529 | SATEQSGTGIR            | K | S | 1,106.54 |
| 5568 | PLS3 plastin 3                                                                  | IP100216694                                                                                                                                                                                                                                                            | 70,795.90  | 519 | 530 | ANDDIIVNVVNR           | K | T | 1,428.72 |
| 5569 | BRD2 Isoform 1 of Bromodomain-containing protein 2                              | IP100014414,IP100797929,IP100893088,IP100893622                                                                                                                                                                                                                        | 88,045.30  | 520 | 528 | LAELQEQLR              | R | A | 1,099.61 |
| 5570 | UHRF1 ubiquitin-like with PHD and ring finger domains 1 isoform 2               | IP100797279,IP100797945                                                                                                                                                                                                                                                | 91,082.30  | 520 | 538 | ALALNCFAPINDQEGAEAK    | R | D | 2,031.98 |
| 5571 | UHRF1 ubiquitin-like with PHD and ring finger domains 1 isoform 2               | IP100797279,IP100797945                                                                                                                                                                                                                                                | 91,082.30  | 520 | 541 | ALALNCFAPINDQEGAEAKD   | R | S | 2,489.19 |
| 5572 | MTHFD1 C-1-tetrahydrofolate synthase, cytoplasmic                               | IP100218342,IP100794900                                                                                                                                                                                                                                                | 101,543.50 | 521 | 532 | LDIDPETITWQR           | R | V | 1,486.75 |
| 5573 | NCL Nucleolin                                                                   | IP100604620                                                                                                                                                                                                                                                            | 76,597.90  | 522 | 537 | SKGYAFIEFASFEDAK       | K | E | 1,809.87 |
| 5574 | PGM1 Isoform 2 of Phosphoglucomutase-1                                          | IP100217872,IP100219526,IP100844159                                                                                                                                                                                                                                    | 63,775.10  | 522 | 533 | LSGTGSAGATIR           | R | L | 1,090.59 |
| 5575 | SLC1A5 Neutral amino acid transporter B(0)                                      | IP100019472                                                                                                                                                                                                                                                            | 56,581.80  | 523 | 541 | HYRGPAGDATVASEKESVM    | K | - | 2,020.94 |
| 5576 | CDC2L2 Isoform SV7 of PITSLRE serine/threonine-protein kinase CDC2L2            | IP100024414,IP100070809,IP100071185,IP100071188,IP100071189,IP10099746,IP100215999,IP100219508,IP100334381,IP100337617,IP100376979,IP100376980,IP100376983,IP100395687,IP100641338,IP100642438,IP100736011,IP100759690,IP100816795,IP100829719,IP100847441,IP100871359 | 90,614.30  | 523 | 530 | TLMIQLLR               | K | G | 987.6021 |
| 5577 | XRN2 Isoform 1 of 5'-3' exoribonuclease 2                                       | IP100100151,IP100788157                                                                                                                                                                                                                                                | 108,567.60 | 523 | 535 | NKFDVDAADEKFR          | K | R | 1,554.75 |
| 5578 | ILF3 Isoform 1 of Interleukin enhancer-binding factor 3                         | IP100298788                                                                                                                                                                                                                                                            | 95,320.90  | 524 | 535 | HGKNPVMELNEK           | K | R | 1,395.71 |

|      |                                                                                 |                                                 |            |     |     |                      |   |   |          |
|------|---------------------------------------------------------------------------------|-------------------------------------------------|------------|-----|-----|----------------------|---|---|----------|
| 5579 | DDX18 ATP-dependent RNA helicase DDX18                                          | IPI00301323                                     | 75,391.70  | 524 | 539 | GHALLILRPEELGFLR     | R | Y | 1,834.07 |
| 5580 | PSMD1 Isoform 1 of 26S proteasome non-ATPase regulatory subunit 1               | IPI00299608,IPI00456695                         | 105,821.20 | 525 | 543 | NAQAIEDMVGYAQETQHEK  | K | I | 2,161.98 |
| 5581 | HNRNPM Isoform 1 of Heterogeneous nuclear ribonucleoprotein M                   | IPI00171903,IPI00383296                         | 77,499.30  | 525 | 531 | MGLSMER              | R | M | 855.37   |
| 5582 | HNRNPU heterogeneous nuclear ribonucleoprotein U isoform a                      | IPI00644079                                     | 90,567.20  | 525 | 536 | YNILGTNTIMDK         | K | M | 1,398.69 |
| 5583 | SLC1A5 Neutral amino acid transporter B(0)                                      | IPI00019472                                     | 56,581.80  | 526 | 541 | GPAGDATVASEKESVM     | R | - | 1,564.72 |
| 5584 | DDX52 Probable ATP-dependent RNA helicase DDX52                                 | IPI00032423                                     | 67,450.30  | 526 | 543 | SVANVIQQAGCPVPEYIK   | R | G | 1,973.02 |
| 5585 | IGF2BP1 Insulin-like growth factor 2 mRNA-binding protein 1                     | IPI00008557                                     | 63,438.30  | 526 | 538 | DQTPDENDQVIVK        | R | I | 1,500.72 |
| 5586 | IGF2BP3 Isoform 1 of Insulin-like growth factor 2 mRNA-binding protein 3        | IPI00658000                                     | 63,702.90  | 526 | 538 | DQTPDENDQVVVK        | R | I | 1,486.70 |
| 5587 | KPNB1 Importin subunit beta-1                                                   | IPI00001639                                     | 97,153.30  | 526 | 537 | SSAYESLMEIVK         | R | N | 1,356.67 |
| 5588 | JUP Junction plakoglobin                                                        | IPI00554711                                     | 81,727.90  | 527 | 533 | LVQLLVK              | R | A | 812.5605 |
| 5589 | ARCN1 Putative uncharacterized protein DKFZp686M09245                           | IPI00298520,IPI00514053                         | 61,581.40  | 527 | 537 | VTQVDGNSPVR          | K | F | 1,171.61 |
| 5590 | SND1 Staphylococcal nuclease domain-containing protein 1                        | IPI00140420,IPI00910438                         | 101,980.50 | 527 | 539 | SEAVVEYVFSGSR        | R | L | 1,429.70 |
| 5591 | SRP68 Isoform 2 of Signal recognition particle 68 kDa protein                   | IPI00102936,IPI00168388                         | 67,287.70  | 527 | 539 | FETFCLDPSLVTK        | R | Q | 1,556.77 |
| 5592 | UBA1 Ubiquitin-like modifier-activating enzyme 1                                | IPI00645078                                     | 117,832.30 | 527 | 537 | LKSDTAAAVR           | K | Q | 1,102.62 |
| 5593 | HNRNPUL1 Isoform 1 of Heterogeneous nuclear ribonucleoprotein U-like protein 1  | IPI00013070,IPI00167147                         | 95,721.70  | 527 | 541 | KAIVICPTDEDLKDR      | R | T | 1,772.92 |
| 5594 | CCT4 T-complex protein 1 subunit delta                                          | IPI00302927,IPI00873222                         | 57,907.90  | 528 | 539 | SILKIDDVVNTR         | R | - | 1,372.78 |
| 5595 | LMNA Isoform A of Lamin-A/C                                                     | IPI00021405                                     | 74,122.60  | 528 | 541 | TALINSTGEEVAMR       | R | K | 1,491.75 |
| 5596 | COPG Coatamer subunit gamma                                                     | IPI00783982                                     | 97,701.40  | 528 | 538 | ATFYLNVLQEK          | R | Q | 1,325.71 |
| 5597 | COPG2 Coatamer subunit gamma-2                                                  | IPI00002557                                     | 97,606.50  | 528 | 538 | ATFYLNVLQQR          | R | Q | 1,352.73 |
| 5598 | GNL3L Guanine nucleotide-binding protein-like 3-like protein                    | IPI00005132,IPI00871959                         | 65,555.30  | 529 | 546 | IMETDPLQQGQALASALK   | R | N | 1,930.00 |
| 5599 | BRD2 Isoform 1 of Bromodomain-containing protein 2                              | IPI00014414,IPI00797929,IPI00893088,IPI00893622 | 88,045.30  | 529 | 546 | AVHEQLAALSQGPISKPK   | R | R | 1,874.05 |
| 5600 | ZNF503 Isoform 1 of Zinc finger protein 503                                     | IPI00304992                                     | 62,538.00  | 529 | 540 | FATSEELLSHLR         | R | T | 1,402.73 |
| 5601 | CPNE8 cDNA FLJ25727 fis, clone TST05479                                         | IPI00334276,IPI00384746                         | 62,217.10  | 531 | 552 | GIKPSPAPPYPPTHVLQTQI | R | - | 2,339.28 |
| 5602 | STIP1 Stress-induced-phosphoprotein 1                                           | IPI00013894,IPI00871856                         | 62,624.10  | 531 | 543 | IQKLMVDVGLAIR        | K | - | 1,485.88 |
| 5603 | ATIC Bifunctional purine biosynthesis protein PURH                              | IPI00289499                                     | 64,598.50  | 531 | 550 | LTEVSISSDAFFPFRDNVDR | K | A | 2,315.13 |
| 5604 | IGF2BP2 insulin-like growth factor 2 mRNA binding protein 2 isoform a           | IPI00179713,IPI00180983,IPI00743914             | 66,104.40  | 531 | 547 | TVNELQNLTSAEVIVPR    | K | D | 1,883.02 |
| 5605 | EIF3L Eukaryotic translation initiation factor 3, subunit E interacting protein | IPI00465233,IPI00745266                         | 70,886.50  | 531 | 537 | IQLLVFK              | R | H | 860.5605 |
| 5606 | CCT4 T-complex protein 1 subunit delta                                          | IPI00302927,IPI00873222                         | 57,907.90  | 532 | 539 | IDDVVNTR             | K | - | 931.4844 |
| 5607 | ADD1 Isoform 1 of Alpha-adducin                                                 | IPI00019901,IPI00220158,IPI00376220             | 80,937.90  | 532 | 543 | SLVQGELVTASK         | R | A | 1,231.69 |
| 5608 | IRGQ Immunity-related GTPase family Q protein                                   | IPI00103925                                     | 62,700.50  | 533 | 544 | ALGLASGELAAR         | R | A | 1,128.64 |
| 5609 | XRCC5 ATP-dependent DNA helicase 2 subunit 2                                    | IPI00220834,IPI00871391                         | 82,689.10  | 533 | 543 | IKTLFPLIEAK          | K | K | 1,272.79 |
| 5610 | XRCC5 ATP-dependent DNA helicase 2 subunit 2                                    | IPI00220834,IPI00871391                         | 82,689.10  | 533 | 543 | IKTLFPLIEAK          | K | K | 1,272.79 |
| 5611 | HSPH1 Isoform Beta of Heat shock protein 105 kDa                                | IPI00218993,IPI00513743                         | 92,099.00  | 533 | 541 | KVDQPPEAK            | K | K | 1,011.55 |
| 5612 | LMNB1 Lamin-B1                                                                  | IPI00217975                                     | 66,391.60  | 533 | 542 | NSQGEVAQR            | K | S | 1,117.52 |
| 5613 | STIP1 Stress-induced-phosphoprotein 1                                           | IPI00013894,IPI00871856                         | 62,624.10  | 534 | 543 | LMDVGLAIR            | K | - | 1,100.65 |
| 5614 | SEC23A Protein transport protein Sec23A                                         | IPI00017375                                     | 86,144.60  | 534 | 544 | AETEEGPDVLR          | R | W | 1,215.59 |
| 5615 | DDX17 DEAD box polypeptide 17 isoform 1                                         | IPI00023785,IPI00651653                         | 80,256.00  | 536 | 547 | VLEEANQAINPK         | K | L | 1,325.71 |
| 5616 | DDX17 DEAD box polypeptide 17 isoform 1                                         | IPI00023785,IPI00651653                         | 80,256.00  | 536 | 547 | VLEEANQAINPK         | K | L | 1,325.71 |
| 5617 | EIF3B Isoform 1 of Eukaryotic translation initiation factor 3 subunit B         | IPI00396370,IPI00719752                         | 92,464.80  | 536 | 548 | GTQGVVTFEIFR         | K | M | 1,467.76 |
| 5618 | ATP6V1A V-type proton ATPase catalytic subunit A                                | IPI00007682                                     | 68,287.40  | 537 | 552 | TVGMLSNMIAFYDMAR     | K | R | 1,867.84 |

|      |                                                                               |                                     |            |     |     |                             |   |   |          |
|------|-------------------------------------------------------------------------------|-------------------------------------|------------|-----|-----|-----------------------------|---|---|----------|
| 5619 | CTTN Src substrate cortactin                                                  | IPI00029601                         | 61,567.40  | 538 | 549 | YGLFPANYVELR                | R | - | 1,441.75 |
| 5620 | CTTN Src substrate cortactin                                                  | IPI00029601                         | 61,567.40  | 538 | 550 | YGLFPANYVELRQ               | R | - | 1,569.81 |
| 5621 | KPNB1 Importin subunit beta-1                                                 | IPI00001639                         | 97,153.30  | 538 | 549 | NSAKDCYPVAVQK               | K | T | 1,380.66 |
| 5622 | PLS3 plastin 3                                                                | IPI00216694                         | 70,795.90  | 538 | 547 | STSIQSFKDK                  | K | T | 1,140.59 |
| 5623 | TCP1 T-complex protein 1 subunit alpha                                        | IPI00290566                         | 60,327.20  | 539 | 556 | DDKHGSYEDAVHSGALND          | K | - | 1,929.82 |
| 5624 | NOP2 Putative uncharacterized protein NOL1                                    | IPI00294891,IPI00654555,IPI00872909 | 93,966.90  | 539 | 553 | LVPTGLDFGQEGFTR             | R | F | 1,636.83 |
| 5625 | IGF2BP1 Insulin-like growth factor 2 mRNA-binding protein 1                   | IPI00008557                         | 63,438.30  | 539 | 551 | IIGHFYASQMAQR               | K | K | 1,521.76 |
| 5626 | TKT cDNA FLJ54957, highly similar to Transketolase                            | IPI00643920                         | 68,725.40  | 539 | 550 | VLDPFTIKPLDR                | R | K | 1,413.81 |
| 5627 | TKT cDNA FLJ54957, highly similar to Transketolase                            | IPI00643920                         | 68,725.40  | 539 | 551 | VLDPFTIKPLDRK               | R | L | 1,541.91 |
| 5628 | HSPA8 Isoform 1 of Heat shock cognate 71 kDa protein                          | IPI00003865                         | 70,881.80  | 540 | 550 | NSLESYAFNMK                 | K | A | 1,319.59 |
| 5629 | HSPA1A;HSPA1B Heat shock 70 kDa protein 1                                     | IPI00304925                         | 70,036.00  | 540 | 550 | NALESYAFNMK                 | K | S | 1,303.60 |
| 5630 | HSPA1A;HSPA1B Heat shock 70 kDa protein 1                                     | IPI00304925                         | 70,036.00  | 540 | 550 | NALESYAFNMK                 | K | S | 1,287.60 |
| 5631 | HSPA1A;HSPA1B Heat shock 70 kDa protein 1                                     | IPI00304925                         | 70,036.00  | 540 | 550 | NALESYAFNMK                 | K | S | 1,287.60 |
| 5632 | HSPA1A;HSPA1B Heat shock 70 kDa protein 1                                     | IPI00304925                         | 70,036.00  | 540 | 550 | NALESYAFNMK                 | K | S | 1,303.60 |
| 5633 | HSPA1A;HSPA1B Heat shock 70 kDa protein 1                                     | IPI00304925                         | 70,036.00  | 540 | 550 | NALESYAFNMK                 | K | S | 1,287.60 |
| 5634 | - cDNA FLJ54408, highly similar to Heat shock 70 kDa protein 1                | IPI00911039                         | 63,907.90  | 541 | 573 | RKELEQVCNPIISGLYQGAGG       | K | G | 3,339.69 |
| 5635 | ABCE1 ATP-binding cassette sub-family E member 1                              | IPI00303207                         | 67,298.40  | 542 | 557 | NTVANSPQTLLAGMNK            | K | F | 1,674.85 |
| 5636 | - cDNA FLJ54408, highly similar to Heat shock 70 kDa protein 1                | IPI00911039                         | 63,907.90  | 542 | 573 | KELEQVCNPIISGLYQGAGGP       | R | G | 3,183.59 |
| 5637 | HNRNPL Heterogeneous nuclear ribonucleoprotein L                              | IPI00027834                         | 64,114.80  | 542 | 552 | PGPGFGAQQGPK<br>SSSGLLEWESK | R | S | 1,222.60 |
| 5638 | - cDNA FLJ54408, highly similar to Heat shock 70 kDa protein 1                | IPI00911039                         | 63,907.90  | 543 | 573 | ELEQVCNPIISGLYQGAGGPG       | K | G | 3,055.49 |
| 5639 | MTHFD1 C-1-tetrahydrofolate synthase, cytoplasmic                             | IPI00218342,IPI00794900             | 101,543.50 | 543 | 553 | PGPGFGAQQGPK<br>KITIGQAPTEK | R | G | 1,185.68 |
| 5640 | TARS Threonyl-tRNA synthetase, cytoplasmic                                    | IPI00329633,IPI00908949             | 83,419.80  | 544 | 554 | IDIQIKDAIGR                 | K | Y | 1,241.72 |
| 5641 | DDX18 ATP-dependent RNA helicase DDX18                                        | IPI00301323                         | 75,391.70  | 546 | 557 | VPLSEFDVSWSK                | K | I | 1,441.70 |
| 5642 | XRCC5 ATP-dependent DNA helicase 2 subunit 2                                  | IPI00220834,IPI00871391             | 82,689.10  | 546 | 565 | DQVTAQEIFQDNHEDGPTAK        | K | K | 2,243.02 |
| 5643 | EIF2A Isoform 1 of Eukaryotic translation initiation factor 2A                | IPI00902564                         | 64,973.20  | 546 | 558 | AIEQLKEQAATGK               | K | Q | 1,386.76 |
| 5644 | DCP1A 63 kDa protein                                                          | IPI00164672,IPI00795655,IPI00871439 | 63,419.20  | 547 | 558 | SQLQDTLIHLIK                | K | N | 1,408.82 |
| 5645 | DDX42 Isoform 1 of ATP-dependent RNA helicase DDX42                           | IPI00409671,IPI00829889             | 102,958.90 | 548 | 560 | DIPVLVATDVAAR               | K | G | 1,339.76 |
| 5646 | SHQ1 Protein SHQ1 homolog                                                     | IPI00465265,IPI00784283             | 65,108.70  | 548 | 556 | TTVQVSEPK                   | K | G | 988.531  |
| 5647 | IGF2BP2 insulin-like growth factor 2 mRNA binding protein 2 isoform a         | IPI00179713,IPI00180983,IPI00743914 | 66,104.40  | 548 | 560 | DQTPDENEEVIVR               | R | I | 1,543.72 |
| 5648 | FMR1 Isoform 8 of Fragile X mental retardation 1 protein                      | IPI00645666                         | 66,228.40  | 548 | 558 | TLQNTSSEGSR                 | K | L | 1,179.56 |
| 5649 | RRM1 Ribonucleoside-diphosphate reductase large subunit                       | IPI00013871                         | 90,055.50  | 549 | 563 | EQGPYETIEGSPVSK             | K | G | 1,670.75 |
| 5650 | ATP2A2 Isoform SERCA2A of Sarcoplasmic/endoplasmic reticulum calcium ATPase 2 | IPI00177817,IPI00219078,IPI00747443 | 109,674.90 | 550 | 559 | EWGSGSDTLR                  | R | C | 1,107.51 |
| 5651 | KPNB1 Importin subunit beta-1                                                 | IPI00001639                         | 97,153.30  | 550 | 557 | TTLVIMER                    | K | L | 962.534  |
| 5652 | HSPA1A;HSPA1B Heat shock 70 kDa protein 1                                     | IPI00304925                         | 70,036.00  | 551 | 559 | SAVEDEGLK                   | K | G | 947.4681 |
| 5653 | HSPA1A;HSPA1B Heat shock 70 kDa protein 1                                     | IPI00304925                         | 70,036.00  | 551 | 561 | SAVEDEGLKGGK                | K | I | 1,132.58 |
| 5654 | HSPA1A;HSPA1B Heat shock 70 kDa protein 1                                     | IPI00304925                         | 70,036.00  | 551 | 561 | SAVEDEGLKGGK                | K | I | 1,132.58 |
| 5655 | GATAD2A Isoform 1 of Transcriptional repressor p66-alpha                      | IPI00410330,IPI00444526,IPI00478128 | 68,044.80  | 551 | 563 | LQNSASATALVSR               | K | T | 1,317.71 |
| 5656 | NCL Nucleolin                                                                 | IPI00604620                         | 76,597.90  | 552 | 561 | AIRLELQGPR                  | R | G | 1,152.68 |
| 5657 | IGF2BP1 Insulin-like growth factor 2 mRNA-binding protein 1                   | IPI00008557                         | 63,438.30  | 552 | 561 | KIRDILAQVK                  | R | Q | 1,183.75 |



|      |                                                                                              |                                                 |            |     |     |                                             |   |   |          |
|------|----------------------------------------------------------------------------------------------|-------------------------------------------------|------------|-----|-----|---------------------------------------------|---|---|----------|
| 5658 | EXOC7 Isoform 3 of Exocyst complex component 7                                               | IPI00103064,IPI00172532,IPI00641168,IPI00877965 | 83,367.10  | 552 | 563 | VLGNLQLNLLSK                                | K | S | 1,311.80 |
| 5659 | IPO8 Importin-8                                                                              | IPI00007401                                     | 119,959.60 | 553 | 565 | ETENDDVTVNIQK                               | R | M | 1,504.71 |
| 5660 | IGF2BP1 Insulin-like growth factor 2 mRNA-binding protein 1                                  | IPI00008557                                     | 63,438.30  | 553 | 561 | IRDILAQVK                                   | K | Q | 1,055.66 |
| 5661 | DNAJC2 Isoform 2 of DnaJ homolog subfamily C member 2                                        | IPI00455199,IPI00830108                         | 65,797.90  | 555 | 565 | AAQEQLVNASR                                 | K | A | 1,186.62 |
| 5662 | STT3A Dolichyl-diphosphooligosaccharide--protein glycosyltransferase subunit STT3A           | IPI00297492                                     | 80,514.80  | 555 | 565 | VGQAMASTEEL                                 | R | A | 1,166.54 |
| 5663 | ILF3 Isoform 1 of Interleukin enhancer-binding factor 3                                      | IPI00298788                                     | 95,320.90  | 555 | 565 | FVMEVEVDGQK                                 | R | F | 1,280.62 |
| 5664 | NCL Nucleolin                                                                                | IPI00604620                                     | 76,597.90  | 555 | 561 | LELQGPR                                     | R | G | 812.4626 |
| 5665 | DDX3X ATP-dependent RNA helicase DDX3X                                                       | IPI00215637                                     | 73,227.70  | 555 | 564 | DLLDLLVEAK                                  | K | Q | 1,128.65 |
| 5666 | CD2AP CD2-associated protein                                                                 | IPI00412771,IPI00872533                         | 71,436.00  | 558 | 570 | ANTTAFLTPLEIK                               | K | A | 1,418.79 |
| 5667 | HNRNPM Isoform 1 of Heterogeneous nuclear ribonucleoprotein M                                | IPI00171903,IPI00383296                         | 77,499.30  | 558 | 565 | MGANNLER                                    | R | M | 920.4255 |
| 5668 | ABCE1 ATP-binding cassette sub-family E member 1                                             | IPI00303207                                     | 67,298.40  | 558 | 567 | FLSQLEITFR                                  | K | R | 1,253.69 |
| 5669 | HNRNPU heterogeneous nuclear ribonucleoprotein U isoform a                                   | IPI00644079                                     | 90,567.20  | 559 | 565 | APQCLGK                                     | R | F | 773.3976 |
| 5670 | DNTTIP2 Deoxynucleotidyltransferase terminal-interacting protein 2                           | IPI00290410                                     | 90,654.40  | 559 | 571 | LTSSSIDPGLSIK                               | K | Q | 1,317.73 |
| 5671 | FARSB Phenylalanyl-tRNA synthetase beta chain                                                | IPI00300074                                     | 66,114.60  | 561 | 571 | LGVLHPDVITK                                 | K | F | 1,191.71 |
| 5672 | NOP56 Nucleolar protein 5A                                                                   | IPI00411937                                     | 66,034.00  | 561 | 578 | KFSKEEPVSSGPPEAVGK                          | R | S | 1,904.96 |
| 5673 | WDR3 WD repeat-containing protein 3                                                          | IPI00009471                                     | 106,084.50 | 563 | 574 | LLAVSLLDCTVK                                | K | I | 1,331.76 |
| 5674 | RPN1 Dolichyl-diphosphooligosaccharide--protein glycosyltransferase 67 kDa subunit precursor | IPI00025874                                     | 72,762.00  | 564 | 575 | ALTSEIALLQSR                                | K | L | 1,301.74 |
| 5675 | RARS Isoform Complexed of Arginyl-tRNA synthetase, cytoplasmic                               | IPI00004860                                     | 75,364.00  | 564 | 573 | ILLDHEKEWK                                  | K | L | 1,310.71 |
| 5676 | TKT cDNA FLJ54957, highly similar to Transketolase                                           | IPI00643920                                     | 68,725.40  | 564 | 602 | ILTVEDHYEGGIGEAVSSAVV R                     | R | S | 4,105.14 |
| 5677 | TKT cDNA FLJ54957, highly similar to Transketolase                                           | IPI00643920                                     | 68,725.40  | 564 | 599 | GEPGIVTHLAVNRVPR<br>ILTVEDHYEGGIGEAVSSAVV R | R | V | 3,752.91 |
| 5678 | ATP6V1A V-type proton ATPase catalytic subunit A                                             | IPI00007682                                     | 68,287.40  | 565 | 571 | GEPGIVTHLAVNR<br>ITWSIIR                    | K | E | 888.5302 |
| 5679 | TOR1AIP1 Putative uncharacterized protein TOR1AIP1                                           | IPI00792065                                     | 66,301.60  | 565 | 580 | ISHLVLPVQPENALKR                            | R | G | 1,814.06 |
| 5680 | LARP5 La-related protein 5                                                                   | IPI00827634,IPI00847241                         | 80,535.10  | 566 | 582 | TLSADASVNTLPVVVSR                           | R | E | 1,728.95 |
| 5681 | PABPC1 Isoform 1 of Polyadenylate-binding protein 1                                          | IPI00008524                                     | 70,653.30  | 566 | 580 | LFPLIQAMHPTLAGK                             | R | I | 1,652.92 |
| 5682 | HNRNPU heterogeneous nuclear ribonucleoprotein U isoform a                                   | IPI00644079                                     | 90,567.20  | 566 | 572 | FIEIAAR                                     | K | K | 819.4723 |
| 5683 | HNRNPU heterogeneous nuclear ribonucleoprotein U isoform a                                   | IPI00644079                                     | 90,567.20  | 566 | 572 | FIEIAAR                                     | K | K | 819.4723 |
| 5684 | HSP90AB1 Heat shock protein HSP 90-beta                                                      | IPI00414676                                     | 83,249.30  | 566 | 574 | LMKEILDKK                                   | K | V | 1,117.67 |
| 5685 | XRCC5 ATP-dependent DNA helicase 2 subunit 2                                                 | IPI00220834,IPI00871391                         | 82,689.10  | 567 | 599 | LKTEQGGAHFSVSSLAEGSV<br>TSVGSVNPANFR        | K | V | 3,362.66 |
| 5686 | DDX1 ATP-dependent RNA helicase DDX1                                                         | IPI00293655                                     | 82,415.10  | 568 | 577 | FLICTDVAAR                                  | R | G | 1,165.60 |
| 5687 | IGF2BP3 Isoform 1 of Insulin-like growth factor 2 mRNA-binding protein 3                     | IPI00658000                                     | 63,702.90  | 568 | 577 | ALQSGPPQSR                                  | K | R | 1,040.55 |
| 5688 | XRCC5 ATP-dependent DNA helicase 2 subunit 2                                                 | IPI00220834,IPI00871391                         | 82,689.10  | 569 | 599 | TEQGGAHFSVSSLAEGSVTS<br>VGSVNPANFR          | K | V | 3,121.48 |
| 5689 | CWC22 Nucampholin homolog                                                                    | IPI00177381,IPI00917297                         | 105,521.30 | 570 | 580 | LSEETTTSSSR                                 | K | I | 1,197.56 |
| 5690 | HNRNPM Isoform 1 of Heterogeneous nuclear ribonucleoprotein M                                | IPI00171903,IPI00383296                         | 77,499.30  | 571 | 578 | MGANSLER                                    | R | M | 893.4146 |
| 5691 | EEF2 Elongation factor 2                                                                     | IPI00186290                                     | 95,322.10  | 572 | 580 | KSDPVVSYR                                   | K | E | 1,050.56 |
| 5692 | EEF2 Elongation factor 2                                                                     | IPI00186290                                     | 95,322.10  | 573 | 580 | SDPVVSYR                                    | K | E | 922.4628 |
| 5693 | UNC45A Isoform 1 of Protein unc-45 homolog A                                                 | IPI00072534,IPI00735181                         | 103,060.90 | 573 | 579 | ALFQLSR                                     | K | L | 834.4832 |
| 5694 | RAD21 Double-strand-break repair protein rad21 homolog                                       | IPI00006715                                     | 71,673.60  | 574 | 586 | TGAESISLLELCR                               | K | N | 1,448.74 |



|      |                                                                                           |                                                             |            |     |     |                            |   |   |          |
|------|-------------------------------------------------------------------------------------------|-------------------------------------------------------------|------------|-----|-----|----------------------------|---|---|----------|
| 5695 | PABPC4 Isoform 1 of Polyadenylate-binding protein 4                                       | IPI00012726,IPI00555747,IPI00642904,IPI00642944             | 70,765.80  | 575 | 589 | LFPLIQTMHSNLAGK            | R | I | 1,685.90 |
| 5696 | AOF2 Isoform 2 of Lysine-specific histone demethylase 1                                   | IPI00217540,IPI00456631                                     | 95,137.70  | 575 | 592 | HWDQDDDFEFTGSHLTVR         | K | N | 2,204.96 |
| 5697 | PAK4 Isoform 1 of Serine/threonine-protein kinase PAK 4                                   | IPI00014068                                                 | 64,054.80  | 575 | 586 | AGPPASIVPLMR               | K | Q | 1,224.68 |
| 5698 | ABCF2 ATP-binding cassette sub-family F member 2                                          | IPI00005045,IPI00068506                                     | 71,274.50  | 575 | 588 | LIQQVAQEIWVCEK             | R | Q | 1,743.91 |
| 5699 | RPA1 Replication protein A 70 kDa DNA-binding subunit                                     | IPI00020127                                                 | 68,121.00  | 576 | 586 | VKVETYNDESR                | R | I | 1,339.65 |
| 5700 | HNRNPU heterogeneous nuclear ribonucleoprotein U isoform a                                | IPI00644079                                                 | 90,567.20  | 576 | 590 | NFILDQTNVSAQAQR            | R | R | 1,647.84 |
| 5701 | TOP1 DNA topoisomerase 1                                                                  | IPI00413611                                                 | 90,711.70  | 576 | 587 | HLQDLMEGLTAK               | K | V | 1,371.69 |
| 5702 | SMEK1 Isoform 1 of Serine/threonine-protein phosphatase 4 regulatory subunit 3A           | IPI00217013,IPI00384714,IPI00479778,IPI00792955             | 95,354.30  | 577 | 585 | SFLFEPVVK                  | K | A | 1,065.60 |
| 5703 | NCL Nucleolin                                                                             | IPI00604620                                                 | 76,597.90  | 578 | 597 | GLSEDTTEETLKESFDGSR        | K | A | 2,200.03 |
| 5704 | COPG2 Coatomer subunit gamma-2                                                            | IPI00002557                                                 | 97,606.50  | 578 | 590 | SIPLAMAPVFEQK              | K | A | 1,446.77 |
| 5705 | ILF3 Isoform 1 of Interleukin enhancer-binding factor 3                                   | IPI00298788                                                 | 95,320.90  | 578 | 587 | AYAALAALEK                 | K | L | 1,020.57 |
| 5706 | TLE3 Isoform 2 of Transducin-like enhancer protein 3                                      | IPI00177938,IPI00182478,IPI00219368,IPI00221206,IPI00867718 | 82,204.70  | 578 | 600 | VCFSCSDGNIIVWDLHNQT<br>LVR | K | Q | 2,751.24 |
| 5707 | HSPA4L Heat shock 70 kDa protein 4L                                                       | IPI00295485,IPI00828021                                     | 94,470.40  | 579 | 590 | SIDLPIQSSLCR               | K | Q | 1,388.72 |
| 5708 | EIF4G2 cDNA FLJ59571, highly similar to Eukaryotic translation initiation factor 4gamma 2 | IPI00015952                                                 | 110,247.70 | 579 | 593 | TQTPPLGQTPQLGLK            | R | T | 1,578.89 |
| 5709 | EEF2 Elongation factor 2                                                                  | IPI00186290                                                 | 95,322.10  | 581 | 594 | ETVSEESNVLCCLSK            | R | S | 1,594.76 |
| 5710 | EEF2 Elongation factor 2                                                                  | IPI00186290                                                 | 95,322.10  | 581 | 594 | ETVSEESNVLCCLSK            | R | S | 1,594.76 |
| 5711 | NPEPPS Puromycin-sensitive aminopeptidase                                                 | IPI00026216                                                 | 103,261.10 | 581 | 590 | LNLGTVGFYR                 | K | T | 1,139.62 |
| 5712 | HSP90AA1 heat shock protein 90kDa alpha (cytosolic), class A member 1 isoform 1           | IPI00382470,IPI00784295                                     | 98,147.10  | 581 | 586 | LSELLR                     | K | Y | 730.4458 |
| 5713 | IMMT Isoform 1 of Mitochondrial inner membrane protein                                    | IPI00009960,IPI00470829,IPI00554469                         | 83,661.00  | 582 | 600 | TSSAETPTIPLGSAVEAIK        | K | A | 1,872.00 |
| 5714 | ANXA6 annexin VI isoform 2                                                                | IPI00002459,IPI00221226                                     | 75,262.70  | 582 | 592 | DAFVAIVQSVK                | R | N | 1,176.66 |
| 5715 | GSPT1 G1 to S phase transition 1 isoform 2                                                | IPI00909083,IPI00910513                                     | 68,555.00  | 583 | 593 | FVKQDQVCIAR                | R | L | 1,363.72 |
| 5716 | GSPT1 G1 to S phase transition 1 isoform 2                                                | IPI00909083,IPI00910513                                     | 68,555.00  | 583 | 593 | FVKQDQVCIAR                | R | L | 1,363.72 |
| 5717 | HSP90AB1 Heat shock protein HSP 90-beta                                                   | IPI00414676                                                 | 83,249.30  | 584 | 604 | LVSSPCCIVTSTYGTANMER       | R | I | 2,432.10 |
| 5718 | UHRF1 ubiquitin-like with PHD and ring finger domains 1 isoform 2                         | IPI00797279,IPI00797945                                     | 91,082.30  | 584 | 590 | SGFLVWR                    | K | Y | 864.4726 |
| 5719 | POR NADPH--cytochrome P450 reductase                                                      | IPI00470467,IPI00792395,IPI00880028,IPI00903331             | 76,672.90  | 585 | 597 | DGALTQLNVAFSR              | R | E | 1,391.73 |
| 5720 | ACTN4 Alpha-actinin-4                                                                     | IPI00013808                                                 | 104,839.20 | 585 | 592 | EAILAIHK                   | R | E | 894.5408 |
| 5721 | TRMT1 Isoform 1 of N(2),N(2)-dimethylguanosine tRNA methyltransferase                     | IPI00020508,IPI00178861                                     | 72,215.30  | 587 | 597 | RKEPPEDVAQR                | K | A | 1,324.70 |
| 5722 | EXOC7 Isoform 3 of Exocyst complex component 7                                            | IPI00103064,IPI00172532,IPI00641168,IPI00877965             | 83,367.10  | 587 | 602 | SLEKSELIQLVAVTQK           | K | T | 1,786.03 |
| 5723 | VCP Transitional endoplasmic reticulum ATPase                                             | IPI00022774                                                 | 89,306.80  | 587 | 599 | GGNIGDGGGAADR              | R | V | 1,116.50 |
| 5724 | RACGAP1 Rac GTPase-activating protein 1                                                   | IPI00152946                                                 | 71,009.80  | 588 | 597 | TPSSSSLSQR                 | K | V | 1,049.52 |
| 5725 | TFRC Transferrin receptor protein 1                                                       | IPI00022462                                                 | 84,855.60  | 589 | 600 | AAAEVAGQFVIK               | R | L | 1,203.67 |
| 5726 | PSMD2 26S proteasome non-ATPase regulatory subunit 2                                      | IPI00012268                                                 | 100,184.20 | 589 | 608 | SFANTLVDVCAYAGSGNVLK       | R | V | 2,086.03 |
| 5727 | TOP1 DNA topoisomerase 1                                                                  | IPI00413611                                                 | 90,711.70  | 591 | 603 | TYNASITLQQQLK              | R | E | 1,507.81 |
| 5728 | HNRNPU heterogeneous nuclear ribonucleoprotein U isoform a                                | IPI00644079                                                 | 90,567.20  | 591 | 601 | RKMCLFAGFQR                | R | K | 1,429.72 |
| 5729 | HSPH1 Isoform Beta of Heat shock protein 105 kDa                                          | IPI00218993,IPI00513743                                     | 92,099.00  | 592 | 602 | NAVEEYVYEFR                | K | D | 1,418.66 |
| 5730 | HNRNPM Isoform 1 of Heterogeneous nuclear ribonucleoprotein M                             | IPI00171903,IPI00383296                                     | 77,499.30  | 592 | 606 | MGPAMGPALGAGIER            | R | M | 1,459.70 |
| 5731 | UBA1 Ubiquitin-like modifier-activating enzyme 1                                          | IPI00645078                                                 | 117,832.30 | 593 | 604 | KPLLESGLTGTK               | R | G | 1,243.73 |
| 5732 | HNRNPU heterogeneous nuclear ribonucleoprotein U isoform a                                | IPI00644079                                                 | 90,567.20  | 593 | 601 | MCLFAGFQR                  | K | K | 1,145.52 |
| 5733 | KPNB1 Importin subunit beta-1                                                             | IPI00001639                                                 | 97,153.30  | 594 | 613 | KVQHQDALQISDVVMASLLR       | R | M | 2,267.22 |

|      |                                                                                 |                         |            |     |     |                       |   |   |          |
|------|---------------------------------------------------------------------------------|-------------------------|------------|-----|-----|-----------------------|---|---|----------|
| 5734 | UHRF1 ubiquitin-like with PHD and ring finger domains 1 isoform 2               | IPI00797279,IPI00797945 | 91,082.30  | 595 | 605 | RDDDEPGPWTK           | R | E | 1,315.59 |
| 5735 | KPNB1 Importin subunit beta-1                                                   | IPI00001639             | 97,153.30  | 595 | 613 | VQHQDALQISDVVMASLLR   | K | M | 2,139.12 |
| 5736 | MTHFD1 C-1-tetrahydrofolate synthase, cytoplasmic                               | IPI00218342,IPI00794900 | 101,543.50 | 596 | 616 | KGEPVSAEDLGVSGALTVLM  | K | D | 2,101.12 |
| 5737 | HSPA1A;HSPA1B Heat shock 70 kDa protein 1                                       | IPI00304925             | 70,036.00  | 596 | 628 | RKELEQVCNPIISGLYQGAGG | K | G | 3,339.69 |
| 5738 | XRCC6 ATP-dependent DNA helicase 2 subunit 1                                    | IPI00644712             | 69,828.40  | 596 | 605 | PGPGGFGAQQGPK         |   |   |          |
| 5739 | HSPA1A;HSPA1B Heat shock 70 kDa protein 1                                       | IPI00304925             | 70,036.00  | 597 | 628 | KQELLEALTK            | K | H | 1,172.69 |
| 5740 | RAD21 Double-strand-break repair protein rad21 homolog                          | IPI00006715             | 71,673.60  | 597 | 604 | KELEQVCNPIISGLYQGAGGP | R | G | 3,183.59 |
| 5741 | ACTN4 Alpha-actinin-4                                                           | IPI00013808             | 104,839.20 | 597 | 604 | PGPGGFGAQQGPK         |   |   |          |
| 5742 | LCP1 Plastin-2                                                                  | IPI00010471             | 70,274.10  | 597 | 610 | FYSFLVLK              | K | K | 1,016.58 |
| 5743 | DIS3 Isoform 2 of Exosome complex exonuclease RRP44                             | IPI00183462,IPI00746351 | 105,025.50 | 598 | 608 | IAESNHIK              | R | L | 911.4945 |
| 5744 | HSPA1A;HSPA1B Heat shock 70 kDa protein 1                                       | IPI00304925             | 70,036.00  | 598 | 628 | VYALPEDLVEVNP         | K | M | 1,585.85 |
| 5745 | PLS1 Plastin-1                                                                  | IPI00032304,IPI00789401 | 70,338.30  | 598 | 611 | GALTLSSPEVR           | K | F | 1,129.62 |
| 5746 | NCL Nucleolin                                                                   | IPI00604620             | 76,597.90  | 600 | 610 | ELEQVCNPIISGLYQGAGGPG | K | G | 3,055.49 |
| 5747 | PLS3 plastin 3                                                                  | IPI00216694             | 70,795.90  | 600 | 613 | PGGFGAQQGPK           |   |   |          |
| 5748 | TFRC Transferrin receptor protein 1                                             | IPI00022462             | 84,855.60  | 601 | 613 | IYALPDDLVEVKPK        | R | M | 1,599.90 |
| 5749 | PSMD1 Isoform 1 of 26S proteasome non-ATPase regulatory subunit 1               | IPI00299608,IPI00456695 | 105,821.20 | 602 | 616 | IVTDRETGSSK           | R | G | 1,192.62 |
| 5750 | CSE1L Isoform 1 of Exportin-2                                                   | IPI00022744,IPI00219994 | 110,403.90 | 602 | 607 | VYALPEDLVEVKPK        | R | M | 1,599.90 |
| 5751 | COPB1 Coatamer subunit beta                                                     | IPI00295851             | 107,128.00 | 603 | 612 | LTHDELNLDYER          | K | Y | 1,616.79 |
| 5752 | DDX3X ATP-dependent RNA helicase DDX3X                                          | IPI00215637             | 73,227.70  | 604 | 617 | LLHVAVSDVNDVRR        | R | A | 1,707.91 |
| 5753 | PABPC1 Isoform 1 of Polyadenylate-binding protein 1                             | IPI00008524             | 70,653.30  | 605 | 620 | LLAVSK                | K | N | 630.4185 |
| 5754 | ACTN4 Alpha-actinin-4                                                           | IPI00013808             | 104,839.20 | 605 | 622 | KPITDDVDVDR           | K | I | 1,173.57 |
| 5755 | EEF2 Elongation factor 2                                                        | IPI00186290             | 95,322.10  | 606 | 625 | QSSGASSSFSSSR         | R | A | 1,361.59 |
| 5756 | EEF2 Elongation factor 2                                                        | IPI00186290             | 95,322.10  | 606 | 629 | SKVDEAVAVLQAHQAK      | R | E | 1,693.92 |
| 5757 | HNRNPM Isoform 1 of Heterogeneous nuclear ribonucleoprotein M                   | IPI00171903,IPI00383296 | 77,499.30  | 607 | 621 | LSGSNPYTTVTPQIINSK    | K | W | 1,920.01 |
| 5758 | PRPF6 Pre-mRNA-processing factor 6                                              | IPI00305068             | 106,909.70 | 607 | 616 | ARFPDGLAEDIDKGEVSAR   | K | Q | 2,143.08 |
| 5759 | TUBGCP4 Gamma-tubulin complex component 4                                       | IPI00004389,IPI00793078 | 76,072.90  | 608 | 617 | ARFPDGLAEDIDKGEVSAR   | K | Q | 2,641.36 |
| 5760 | NCL Nucleolin                                                                   | IPI00604620             | 76,597.90  | 611 | 624 | QELK                  |   |   |          |
| 5761 | LCP1 Plastin-2                                                                  | IPI00010471             | 70,274.10  | 611 | 622 | MGLAMGGGGGASFDR       | R | A | 1,415.60 |
| 5762 | TKT cDNA FLJ54957, highly similar to Transketolase                              | IPI00643920             | 68,725.40  | 612 | 625 | AEVLWLMGAK            | K | S | 1,117.61 |
| 5763 | PLS1 Plastin-1                                                                  | IPI00032304,IPI00789401 | 70,338.30  | 612 | 623 | GAAQLSILVK            | R | G | 999.6198 |
| 5764 | HSP90AA1 heat shock protein 90kDa alpha (cytosolic), class A member 1 isoform 1 | IPI00382470,IPI00784295 | 98,147.10  | 612 | 632 | GFGFVDFNSEEDAK        | K | A | 1,561.68 |
| 5765 | HSP90AB1 Heat shock protein HSP 90-beta                                         | IPI00414676             | 83,249.30  | 613 | 623 | MVMTVFACLMGK          | K | G | 1,419.65 |
| 5766 | PLS3 plastin 3                                                                  | IPI00216694             | 70,795.90  | 614 | 625 | MFGIDRDAIAQAVR        | K | G | 1,562.81 |
| 5767 | PFKP 6-phosphofructokinase type C                                               | IPI00009790             | 85,579.40  | 614 | 625 | MVMTVFACLMGK          | K | G | 1,419.65 |
| 5768 | NPEPPS Puromycin-sensitive aminopeptidase                                       | IPI00026216             | 103,261.10 | 616 | 627 | HIYYITGETKDQVANSFVER  | K | L | 2,441.21 |
| 5769 | HSPA4 Heat shock 70 kDa protein 4                                               | IPI00002966             | 94,313.90  | 619 | 629 | DNSTMGYMMAK           | R | K | 1,264.50 |
| 5770 | HNRNPU heterogeneous nuclear ribonucleoprotein U isoform a                      | IPI00644079             | 90,567.20  | 620 | 635 | MVMTVFACLMGR          | K | G | 1,447.66 |
| 5771 | HSP90AA1 heat shock protein 90kDa alpha (cytosolic), class A member 1 isoform 1 | IPI00382470,IPI00784295 | 98,147.10  | 622 | 632 | DLQSNVEHLTEK          | R | M | 1,412.70 |
| 5772 | HSP90AA1 heat shock protein 90kDa alpha (cytosolic), class A member 1 isoform 1 | IPI00382470,IPI00784295 | 98,147.10  | 622 | 632 | LGLQNDLFLSLAR         | R | A | 1,346.74 |
| 5773 | HSPA5 HSPA5 protein                                                             | IPI00003362             | 72,405.60  | 623 | 634 | NAVEEYVYEMR           | K | D | 1,418.63 |
| 5774 | HSPH1 Isoform Beta of Heat shock protein 105 kDa                                | IPI00218993,IPI00513743 | 92,099.00  | 624 | 641 | KAEVEGKDLPEHAVLK      | K | M | 1,762.97 |
|      |                                                                                 |                         |            |     |     | DQVANSFVER            | K | L | 1,235.60 |
|      |                                                                                 |                         |            |     |     | DQVANSFVER            | K | L | 1,235.60 |
|      |                                                                                 |                         |            |     |     | ELEEIVQPIISK          | K | L | 1,397.79 |
|      |                                                                                 |                         |            |     |     | LLTETEDWLYEEGEDQAK    | R | Q | 2,168.99 |

|      |                                                                                   |                                                 |            |     |     |                      |   |   |          |
|------|-----------------------------------------------------------------------------------|-------------------------------------------------|------------|-----|-----|----------------------|---|---|----------|
| 5775 | MCCC1 Methylcrotonoyl-CoA carboxylase subunit alpha, mitochondrial                | IPI00024580,IPI00792499                         | 80,455.60  | 624 | 635 | EGSIEIDIPVPK         | K | Y | 1,296.70 |
| 5776 | HSP90AB1 Heat shock protein HSP 90-beta                                           | IPI00414676                                     | 83,249.30  | 625 | 639 | HLEINPDHPIVETLR      | K | Q | 1,782.95 |
| 5777 | HSPA9 Stress-70 protein, mitochondrial                                            | IPI00007765                                     | 73,663.30  | 625 | 634 | KDSETGENIR           | R | Q | 1,148.55 |
| 5778 | RRM1 Ribonucleoside-diphosphate reductase large subunit                           | IPI00013871                                     | 90,055.50  | 628 | 643 | RVLSGEFQIVNPHLLK     | R | D | 1,850.06 |
| 5779 | LMNA Isoform A of Lamin-A/C                                                       | IPI00021405                                     | 74,122.60  | 628 | 644 | SVGGSGGGSGFDNLVTR    | R | S | 1,566.75 |
| 5780 | RRM1 Ribonucleoside-diphosphate reductase large subunit                           | IPI00013871                                     | 90,055.50  | 629 | 643 | VLSGFEQIVNPHLLK      | R | D | 1,693.96 |
| 5781 | NSUN2 tRNA (cytosine-5-)-methyltransferase NSUN2                                  | IPI00306369                                     | 86,454.80  | 629 | 639 | ILLTQENPFFR          | K | K | 1,377.75 |
| 5782 | COPG2 Coatomer subunit gamma-2                                                    | IPI00002557                                     | 97,606.50  | 630 | 646 | SSEPVQLTEAETEYFVR    | K | C | 1,984.95 |
| 5783 | ATP1A1 Isoform Long of Sodium/potassium-transporting ATPase subunit alpha-1       | IPI00006482,IPI00646182                         | 112,881.50 | 630 | 647 | GVGIISEGNETVEDIAAR   | K | L | 1,829.92 |
| 5784 | RBM14;RBM4 Isoform 1 of RNA-binding protein 14                                    | IPI00013174                                     | 69,474.30  | 631 | 636 | SSLDYR               | K | R | 740.3573 |
| 5785 | COPG Coatomer subunit gamma                                                       | IPI00783982                                     | 97,701.40  | 632 | 649 | SSPEPVALTESETEYVIR   | K | C | 2,006.99 |
| 5786 | ACTN4 Alpha-actinin-4                                                             | IPI00013808                                     | 104,839.20 | 633 | 643 | RDHALLLEEQSK         | K | Q | 1,325.68 |
| 5787 | QRICH1 Glutamine-rich protein 1                                                   | IPI00328200                                     | 86,415.20  | 633 | 637 | YFLLK                | K | T | 683.4127 |
| 5788 | EEF2 Elongation factor 2                                                          | IPI00186290                                     | 95,322.10  | 634 | 647 | YLAEKYEWVVAEAR       | R | K | 1,742.84 |
| 5789 | RARS Isoform Complexed of Arginyl-tRNA synthetase, cytoplasmic                    | IPI00004860                                     | 75,364.00  | 635 | 647 | MLLCEAVAAMAK         | R | G | 1,422.72 |
| 5790 | HSP90AA1 heat shock protein 90kDa alpha (cytosolic), class A member 1 isoform 1   | IPI00382470,IPI00784295                         | 98,147.10  | 636 | 656 | HGLEVIYMIPEIDYCVQQLK | K | E | 2,593.27 |
| 5791 | DDX24 ATP-dependent RNA helicase DDX24                                            | IPI00006987                                     | 96,316.70  | 636 | 649 | LEDCVLLATDVAAR       | R | G | 1,545.79 |
| 5792 | SART1 U4/U6.U5 tri-snRNP-associated protein 1                                     | IPI00021417                                     | 90,239.10  | 637 | 648 | GLAAALLLCQNK         | R | G | 1,271.71 |
| 5793 | JUP Junction plakoglobin                                                          | IPI00554711                                     | 81,727.90  | 638 | 651 | NEGATYAAAVLFR        | R | I | 1,483.75 |
| 5794 | EEF2 Elongation factor 2                                                          | IPI00186290                                     | 95,322.10  | 639 | 647 | YEWVVAEAR            | K | K | 1,138.52 |
| 5795 | GARS Glycyl-tRNA synthetase                                                       | IPI00783097,IPI00915808                         | 83,123.50  | 641 | 657 | HGVSHKVDSSGSIGRR     | R | Y | 1,793.90 |
| 5796 | MARS Methionyl-tRNA synthetase, cytoplasmic                                       | IPI00008240                                     | 101,099.50 | 642 | 656 | NNSELLNNLGNFINR      | K | A | 1,731.88 |
| 5797 | EIF3CL;EIF3C Eukaryotic translation initiation factor 3 subunit C                 | IPI00016910,IPI00646839,IPI00873286,IPI00910003 | 105,329.20 | 642 | 653 | AKELLGQGLLLR         | R | S | 1,310.82 |
| 5798 | TARS Threonyl-tRNA synthetase, cytoplasmic                                        | IPI00329633,IPI00908949                         | 83,419.80  | 646 | 661 | FMADIDLDPGCTLNKK     | K | I | 1,837.88 |
| 5799 | TARS Threonyl-tRNA synthetase, cytoplasmic                                        | IPI00329633,IPI00908949                         | 83,419.80  | 646 | 660 | FMADIDLDPGCTLNK      | K | K | 1,709.79 |
| 5800 | C12orf11 Uncharacterized protein C12orf11                                         | IPI00550986                                     | 80,207.70  | 647 | 660 | SKGPVSLLSLWSNR       | K | I | 1,543.86 |
| 5801 | RARS Isoform Complexed of Arginyl-tRNA synthetase, cytoplasmic                    | IPI00004860                                     | 75,364.00  | 648 | 659 | GFDILGIKPVQR         | K | - | 1,342.78 |
| 5802 | RBM14;RBM4 Isoform 1 of RNA-binding protein 14                                    | IPI00013174                                     | 69,474.30  | 648 | 657 | YSGSYNDYLR           | R | A | 1,237.55 |
| 5803 | KIAA1524 Isoform 1 of Protein CIP2A                                               | IPI00154283                                     | 102,171.30 | 648 | 656 | ALALAQADR            | K | L | 928.5211 |
| 5804 | WDR6 WD repeat-containing protein 6                                               | IPI00013953,IPI00794322,IPI00797612             | 121,705.90 | 648 | 658 | LHIVNCGGGHR          | K | S | 1,219.61 |
| 5805 | HNRNPM Isoform 1 of Heterogeneous nuclear ribonucleoprotein M                     | IPI00171903,IPI00383296                         | 77,499.30  | 651 | 658 | KACQIFVR             | R | N | 1,021.56 |
| 5806 | PREP Prolyl endopeptidase                                                         | IPI00008164                                     | 80,683.50  | 652 | 662 | FIATLQYIVGR          | K | S | 1,280.74 |
| 5807 | PCCA propionyl-Coenzyme A carboxylase, alpha polypeptide isoform a precursor      | IPI00744115,IPI00796978,IPI00895869             | 80,041.20  | 654 | 663 | VTEDTSSVLR           | K | S | 1,106.57 |
| 5808 | ATP2A2 Isoform SERCA2A of Sarcoplasmic/endoplasmic reticulum calcium ATPase 2     | IPI00177817,IPI00219078,IPI00747443             | 109,674.90 | 656 | 666 | EFDELNPSAQR          | R | D | 1,305.61 |
| 5809 | CHUK Inhibitor of nuclear factor kappa-B kinase subunit alpha                     | IPI00005104                                     | 84,638.10  | 656 | 664 | IACTQSSAR            | K | S | 993.4782 |
| 5810 | DDX24 ATP-dependent RNA helicase DDX24                                            | IPI00006987                                     | 96,316.70  | 656 | 666 | VQHVHIYQVPR          | K | T | 1,375.76 |
| 5811 | MCM2 DNA replication licensing factor MCM2                                        | IPI00184330                                     | 101,880.10 | 657 | 664 | FDILCVVR             | R | D | 1,021.55 |
| 5812 | NASP Isoform 1 of Nuclear autoantigenic sperm protein                             | IPI00179953,IPI00219821,IPI00332499             | 85,217.50  | 662 | 671 | SGNVAELALK           | R | A | 1,001.56 |
| 5813 | PDXDC1 Isoform 1 of Pyridoxal-dependent decarboxylase domain-containing protein 1 | IPI00384689,IPI00645809                         | 86,690.10  | 662 | 680 | TFNLTAGSLESTEPIYVYK  | R | A | 2,133.08 |
| 5814 | JUP Junction plakoglobin                                                          | IPI00554711                                     | 81,727.90  | 664 | 674 | VVELTNSLFLK          | R | H | 1,236.68 |
| 5815 | AARS Alanyl-tRNA synthetase, cytoplasmic                                          | IPI00027442,IPI00910701                         | 106,795.20 | 665 | 677 | AVYTQDCPLAAAK        | K | A | 1,407.69 |

|      |                                                                                                  |                                                                              |            |     |     |                       |   |   |          |
|------|--------------------------------------------------------------------------------------------------|------------------------------------------------------------------------------|------------|-----|-----|-----------------------|---|---|----------|
| 5816 | HNRNPU heterogeneous nuclear ribonucleoprotein U isoform a                                       | UPI00644079                                                                  | 90,567.20  | 665 | 675 | LLEQYKEESKK           | K | A | 1,394.75 |
| 5817 | BRD2 Isoform 1 of Bromodomain-containing protein 2                                               | UPI00014414, IPI00797929, IPI00893088, IPI00893622                           | 88,045.30  | 665 | 672 | VVHIIQAR              | R | E | 935.5785 |
| 5818 | SRPK1 Isoform 2 of Serine/threonine-protein kinase SRPK1                                         | UPI00412344                                                                  | 92,430.40  | 665 | 676 | IADLGACWVHK           | K | H | 1,383.68 |
| 5819 | APEH Acylamino-acid-releasing enzyme                                                             | UPI00337741                                                                  | 81,206.00  | 665 | 676 | TPLLMLGQEDR           | K | R | 1,401.74 |
| 5820 | APEH Acylamino-acid-releasing enzyme                                                             | UPI00337741                                                                  | 81,206.00  | 665 | 676 | TPLLMLGQEDR           | K | R | 1,401.74 |
| 5821 | ATP2A2 Isoform SERCA2A of Sarcoplasmic/endoplasmic reticulum calcium ATPase 2                    | UPI00177817, IPI00219078, IPI00747443                                        | 109,674.90 | 667 | 673 | DACLNAR               | R | C | 819.3778 |
| 5822 | DDX27 Probable ATP-dependent RNA helicase DDX27                                                  | UPI00293078                                                                  | 89,820.10  | 667 | 676 | ALQEFDLALR            | K | G | 1,175.64 |
| 5823 | SFPQ Isoform Long of Splicing factor, proline- and glutamine-rich                                | UPI00010740                                                                  | 76,131.50  | 667 | 681 | FGQQGAGPVGGQGPR       | R | G | 1,341.67 |
| 5824 | DDX21 Isoform 1 of Nucleolar RNA helicase 2                                                      | UPI00015953                                                                  | 87,328.00  | 671 | 676 | GMVFLK                | K | G | 694.3957 |
| 5825 | HSPH1 Isoform Beta of Heat shock protein 105 kDa                                                 | UPI00218993, IPI00513743                                                     | 92,099.00  | 671 | 678 | MFEELGQR              | K | L | 1,009.48 |
| 5826 | DDX17 DEAD box polypeptide 17 isoform 1                                                          | UPI00023785, IPI00651653                                                     | 80,256.00  | 671 | 684 | SSQSSSQFSGIGR         | R | S | 1,455.68 |
| 5827 | EIF4G2 cDNA FLJ59571, highly similar to Eukaryotic translation initiation factor 4gamma 2        | UPI00015952                                                                  | 110,247.70 | 673 | 681 | ASSLISLLK             | K | Q | 931.5823 |
| 5828 | PFKM cDNA FLJ44241 fis, clone THYMU3008436, highly similar to 6-phosphofructokinase, muscle type | UPI00465179, IPI00743142                                                     | 93,203.30  | 675 | 686 | DLQANVEHLVQK          | R | M | 1,393.74 |
| 5829 | TFRC Transferrin receptor protein 1                                                              | UPI00022462                                                                  | 84,855.60  | 678 | 693 | VMRVEYHFLSPYVSPK      | R | E | 1,968.00 |
| 5830 | UBA1 Ubiquitin-like modifier-activating enzyme 1                                                 | UPI00645078                                                                  | 117,832.30 | 679 | 693 | LAGTQPLEVLEAVQR       | R | S | 1,623.91 |
| 5831 | UBA1 Ubiquitin-like modifier-activating enzyme 1                                                 | UPI00645078                                                                  | 117,832.30 | 679 | 693 | LAGTQPLEVLEAVQR       | R | S | 1,623.91 |
| 5832 | DDX21 Isoform 1 of Nucleolar RNA helicase 2                                                      | UPI00015953                                                                  | 87,328.00  | 679 | 696 | LGVCFDVPTASVTEIQEK    | K | W | 1,992.99 |
| 5833 | TARS Threonyl-tRNA synthetase, cytoplasmic                                                       | UPI00329633, IPI00908949                                                     | 83,419.80  | 682 | 689 | ISGTVNIR              | K | T | 859.4996 |
| 5834 | SEC23A Protein transport protein Sec23A                                                          | UPI00017375                                                                  | 86,144.60  | 683 | 699 | HLLQAPVDDAQEILHSR     | R | F | 1,942.01 |
| 5835 | UHRF1 ubiquitin-like with PHD and ring finger domains 1 isoform 2                                | UPI00797279, IPI00797945                                                     | 91,082.30  | 684 | 698 | VEPYSLTAQQSSLIR       | K | E | 1,691.90 |
| 5836 | MTHFD1 C-1-tetrahydrofolate synthase, cytoplasmic                                                | UPI00218342, IPI00794900                                                     | 101,543.50 | 687 | 702 | YSGLCPHVVLVATVR       | R | A | 1,769.97 |
| 5837 | PREP Prolyl endopeptidase                                                                        | UPI00008164                                                                  | 80,683.50  | 689 | 702 | VIEEVSDMFAFIAR        | K | C | 1,642.81 |
| 5838 | XRCC5 ATP-dependent DNA helicase 2 subunit 2                                                     | UPI00220834, IPI00871391                                                     | 82,689.10  | 689 | 703 | EEASGSSVTAEAAK        | K | F | 1,522.72 |
| 5839 | EEF2 Elongation factor 2                                                                         | UPI00186290                                                                  | 95,322.10  | 689 | 698 | EGALCEENMR            | K | G | 1,208.50 |
| 5840 | XRCC5 ATP-dependent DNA helicase 2 subunit 2                                                     | UPI00220834, IPI00871391                                                     | 82,689.10  | 689 | 702 | EEASGSSVTAEAAK        | K | K | 1,394.63 |
| 5841 | UNC45A Isoform 1 of Protein unc-45 homolog A                                                     | UPI00072534, IPI00735181                                                     | 103,060.90 | 692 | 707 | ALIPLALEGTDVGQTK      | R | A | 1,625.91 |
| 5842 | DNM1L Isoform 5 of Dynamin-1-like protein                                                        | UPI00037283, IPI00146935, IPI00235412, IPI00473085, IPI00555883, IPI00871742 | 79,093.20  | 693 | 705 | ALQGASQIIAEIR         | K | E | 1,369.78 |
| 5843 | PRPF6 Pre-mRNA-processing factor 6                                                               | UPI00305068                                                                  | 106,909.70 | 693 | 703 | AAQDLCEEALR           | R | H | 1,275.60 |
| 5844 | SFPQ Isoform Long of Splicing factor, proline- and glutamine-rich                                | UPI00010740                                                                  | 76,131.50  | 694 | 706 | GREEYEGPNKKPR         | R | - | 1,559.79 |
| 5845 | STAU1 Isoform Short of Double-stranded RNA-binding protein Staufen homolog 1                     | UPI00218609, IPI00643664, IPI_WendyP53Mut                                    | 124,563.80 | 696 | 705 | ILQNEPLPER            | R | L | 1,208.66 |
| 5846 | COPG Coatomer subunit gamma                                                                      | UPI00783982                                                                  | 97,701.40  | 697 | 714 | SLPYNQPGTCYTLVALPK    | R | E | 2,022.04 |
| 5847 | CSE1L Isoform 1 of Exportin-2                                                                    | UPI00022744, IPI00219994                                                     | 110,403.90 | 698 | 706 | TGNIPALVR             | R | L | 940.5575 |
| 5848 | PFKL Isoform 1 of 6-phosphofructokinase, liver type                                              | UPI00332371, IPI00902982                                                     | 85,001.20  | 699 | 713 | VFANAPDSACVIGLK       | R | K | 1,561.80 |
| 5849 | RRM1 Ribonucleoside-diphosphate reductase large subunit                                          | UPI00013871                                                                  | 90,055.50  | 699 | 719 | GAFIDQSQSLNIHIAEPNYGK | R | L | 2,302.15 |
| 5850 | APEH Acylamino-acid-releasing enzyme                                                             | UPI00337741                                                                  | 81,206.00  | 699 | 704 | LLLYPK                | R | S | 746.4812 |
| 5851 | XPO1 Exportin-1                                                                                  | UPI00298961, IPI00893013                                                     | 123,370.90 | 701 | 712 | AVGHFPVIQLGR          | K | I | 1,293.74 |
| 5852 | PSMD2 26S proteasome non-ATPase regulatory subunit 2                                             | UPI00012268                                                                  | 100,184.20 | 704 | 712 | LNILDTLISK            | R | F | 1,016.60 |
| 5853 | EIF4G2 cDNA FLJ59571, highly similar to Eukaryotic translation initiation factor 4gamma 2        | UPI00015952                                                                  | 110,247.70 | 705 | 713 | LEVDIPLVK             | K | S | 1,025.62 |

|      |                                                                                           |                                                                                                                                                                                                                                                                                                                                     |            |     |     |                       |   |   |          |
|------|-------------------------------------------------------------------------------------------|-------------------------------------------------------------------------------------------------------------------------------------------------------------------------------------------------------------------------------------------------------------------------------------------------------------------------------------|------------|-----|-----|-----------------------|---|---|----------|
| 5854 | CTNND1 Isoform 1AB of Catenin delta-1                                                     | UPI00182469,UPI00182540,UPI00219725,UPI00219726,UPI00219727,UPI00219728,UPI00219730,UPI00219731,UPI00219732,UPI00219733,UPI00219734,UPI00219735,UPI00219737,UPI00219738,UPI00219739,UPI00219741,UPI00219742,UPI00219868,UPI00219869,UPI00219870,UPI00219872,UPI00219873,UPI00219875,UPI00419482,UPI00845246,UPI00845519,UPI00848265 | 107,403.00 | 705 | 719 | ALSAIADLLTNEHER       | K | V | 1,652.86 |
| 5855 | CSE1L Isoform 1 of Exportin-2                                                             | UPI00022744,UPI00219994                                                                                                                                                                                                                                                                                                             | 110,403.90 | 707 | 714 | LLQAFLEER             | R | G | 989.5779 |
| 5856 | MCCC1 Methylcrotonoyl-CoA carboxylase subunit alpha, mitochondrial                        | UPI00024580,UPI00792499                                                                                                                                                                                                                                                                                                             | 80,455.60  | 708 | 725 | HTPLVFEFEESDKRESE     | R | - | 2,189.98 |
| 5857 | DDX42 Isoform 1 of ATP-dependent RNA helicase DDX42                                       | UPI00409671,UPI00829889                                                                                                                                                                                                                                                                                                             | 102,958.90 | 709 | 720 | SHFVAASLSNQK          | K | A | 1,288.66 |
| 5858 | PFKP 6-phosphofructokinase type C                                                         | UPI00009790                                                                                                                                                                                                                                                                                                                         | 85,579.40  | 711 | 724 | FTTDDSDICVLGISK       | K | R | 1,555.77 |
| 5859 | IDE Insulin-degrading enzyme                                                              | UPI00220373                                                                                                                                                                                                                                                                                                                         | 117,956.00 | 712 | 722 | LKAFIPQLLSR           | R | L | 1,285.80 |
| 5860 | ATP2A2 Isoform SERCA2A of Sarcoplasmic/endoplasmic reticulum calcium ATPase 2             | UPI00177817,UPI00219078,UPI00747443                                                                                                                                                                                                                                                                                                 | 109,674.90 | 712 | 727 | KAEIGIAMGSGTAVAK      | K | T | 1,519.82 |
| 5861 | EIF4G2 cDNA FLJ59571, highly similar to Eukaryotic translation initiation factor 4gamma 2 | UPI00015952                                                                                                                                                                                                                                                                                                                         | 110,247.70 | 714 | 722 | SYLAQFAAR             | K | A | 1,026.54 |
| 5862 | HSP90AA1 heat shock protein 90kDa alpha (cytosolic), class A member 1 isoform 1           | UPI00382470,UPI00784295                                                                                                                                                                                                                                                                                                             | 98,147.10  | 714 | 734 | LVTSPCCIVTSTYGWTANMER | R | I | 2,446.12 |
| 5863 | CSE1L Isoform 1 of Exportin-2                                                             | UPI00022744,UPI00219994                                                                                                                                                                                                                                                                                                             | 110,403.90 | 715 | 736 | GSNTIASAAADKIPGLLGVFQ | R | L | 2,158.19 |
| 5864 | UHRF1 ubiquitin-like with PHD and ring finger domains 1 isoform 2                         | UPI00797279,UPI00797945                                                                                                                                                                                                                                                                                                             | 91,082.30  | 716 | 730 | KDRPASGSPFQLFLSK      | K | V | 1,649.86 |
| 5865 | TLE3 Isoform 2 of Transducin-like enhancer protein 3                                      | UPI00177938,UPI00182478,UPI00219368,UPI00221206,UPI00867718                                                                                                                                                                                                                                                                         | 82,204.70  | 717 | 727 | TPYGASIFQSK           | R | E | 1,198.61 |
| 5866 | SEC23A Protein transport protein Sec23A                                                   | UPI00017375                                                                                                                                                                                                                                                                                                                         | 86,144.60  | 717 | 721 | FLLSK                 | R | V | 607.3814 |
| 5867 | MTHFD1 C-1-tetrahydrofolate synthase, cytoplasmic                                         | UPI00218342,UPI00794900                                                                                                                                                                                                                                                                                                             | 101,543.50 | 722 | 733 | AYIQENLELVEK          | K | G | 1,448.76 |
| 5868 | MCM6 DNA replication licensing factor MCM6                                                | UPI00031517                                                                                                                                                                                                                                                                                                                         | 92,872.60  | 723 | 732 | ISNLIVLHLR            | R | K | 1,177.74 |
| 5869 | PFKP 6-phosphofructokinase type C                                                         | UPI00009790                                                                                                                                                                                                                                                                                                                         | 85,579.40  | 726 | 736 | NVIFQPVAELK           | R | K | 1,257.72 |
| 5870 | PFKP 6-phosphofructokinase type C                                                         | UPI00009790                                                                                                                                                                                                                                                                                                                         | 85,579.40  | 726 | 737 | NVIFQPVAELKK          | R | Q | 1,385.82 |
| 5871 | EEF2 Elongation factor 2                                                                  | UPI00186290                                                                                                                                                                                                                                                                                                                         | 95,322.10  | 727 | 739 | RCLYASVLTAQPR         | R | L | 1,534.82 |
| 5872 | ATP1A1 Isoform Long of Sodium/potassium-transporting ATPase subunit alpha-1               | UPI00006482,UPI00646182                                                                                                                                                                                                                                                                                                             | 112,881.50 | 727 | 743 | KADIGVAMGIAGSDVSK     | K | Q | 1,618.85 |
| 5873 | EEF2 Elongation factor 2                                                                  | UPI00186290                                                                                                                                                                                                                                                                                                                         | 95,322.10  | 728 | 739 | CLYASVLTAQPR          | R | L | 1,378.71 |
| 5874 | ATP1A1 Isoform Long of Sodium/potassium-transporting ATPase subunit alpha-1               | UPI00006482,UPI00646182                                                                                                                                                                                                                                                                                                             | 112,881.50 | 728 | 743 | ADIGVAMGIAGSDVSK      | K | Q | 1,506.75 |
| 5875 | AARS Alanyl-tRNA synthetase, cytoplasmic                                                  | UPI00027442,UPI00910701                                                                                                                                                                                                                                                                                                             | 106,795.20 | 730 | 747 | NSSHAGAFVIVTEEIAIAK   | R | G | 1,843.95 |
| 5876 | ACTN4 Alpha-actinin-4                                                                     | UPI00013808                                                                                                                                                                                                                                                                                                                         | 104,839.20 | 734 | 745 | VGWEQLLTTIAR          | R | T | 1,386.77 |
| 5877 | BRD2 Isoform 1 of Bromodomain-containing protein 2                                        | UPI00014414,UPI00797929,UPI00893088,UPI00893622                                                                                                                                                                                                                                                                                     | 88,045.30  | 740 | 751 | LQDVSGQLNSTK          | R | K | 1,289.67 |
| 5878 | RRM1 Ribonucleoside-diphosphate reductase large subunit                                   | UPI00013871                                                                                                                                                                                                                                                                                                                         | 90,055.50  | 741 | 754 | TRPAANPIQFTLNK        | R | E | 1,570.87 |
| 5879 | HSPH1 Isoform Beta of Heat shock protein 105 kDa                                          | UPI00218993,UPI00513743                                                                                                                                                                                                                                                                                                             | 92,099.00  | 745 | 762 | IKELNNTCEPVVTQPKPK    | K | I | 2,095.12 |
| 5880 | ACTN4 Alpha-actinin-4                                                                     | UPI00013808                                                                                                                                                                                                                                                                                                                         | 104,839.20 | 746 | 757 | TINEVENQILTR          | R | D | 1,429.76 |
| 5881 | COPB2 Coatomer subunit beta'                                                              | UPI00220219                                                                                                                                                                                                                                                                                                                         | 102,471.10 | 748 | 759 | TGRLPEAAFLAR          | R | T | 1,301.73 |
| 5882 | TRIM28 Isoform 1 of Transcription intermediary factor 1-beta                              | UPI00438229,UPI00438230                                                                                                                                                                                                                                                                                                             | 88,531.00  | 751 | 767 | LSPPYSSPQEFAQDVGR     | K | M | 1,877.90 |
| 5883 | ABCF1 Isoform 2 of ATP-binding cassette sub-family F member 1                             | UPI00013495,UPI00873899                                                                                                                                                                                                                                                                                                             | 91,664.60  | 752 | 762 | GAVIVVSHDAR           | K | L | 1,123.62 |
| 5884 | DIS3 Isoform 2 of Exosome complex exonuclease RRP44                                       | UPI00183462,UPI00746351                                                                                                                                                                                                                                                                                                             | 105,025.50 | 752 | 759 | YADVIVHR              | R | L | 972.5261 |
| 5885 | QRICH1 Glutamine-rich protein 1                                                           | UPI00328200                                                                                                                                                                                                                                                                                                                         | 86,415.20  | 757 | 761 | ILVIR                 | R | E | 613.4396 |
| 5886 | STAU1 Isoform Short of Double-stranded RNA-binding protein Staufen homolog 1              | UPI00218609,UPI00643664,UPI_WendyP53Mut                                                                                                                                                                                                                                                                                             | 124,563.80 | 757 | 769 | VSVGEFVGELEGK         | K | S | 1,293.63 |
| 5887 | ACTN4 Alpha-actinin-4                                                                     | UPI00013808                                                                                                                                                                                                                                                                                                                         | 104,839.20 | 761 | 771 | GISQEQMQEFR           | K | A | 1,368.62 |
| 5888 | MTHFD1 C-1-tetrahydrofolate synthase, cytoplasmic                                         | UPI00218342,UPI00794900                                                                                                                                                                                                                                                                                                             | 101,543.50 | 761 | 772 | TDTESELDLISR          | K | L | 1,378.67 |
| 5889 | QRICH1 Glutamine-rich protein 1                                                           | UPI00328200                                                                                                                                                                                                                                                                                                                         | 86,415.20  | 762 | 776 | EIQEAIIVANASTMH       | R | - | 1,600.76 |

|      |                                                                                                  |                                                 |            |     |     |                            |   |   |          |
|------|--------------------------------------------------------------------------------------------------|-------------------------------------------------|------------|-----|-----|----------------------------|---|---|----------|
| 5890 | PSMD2 26S proteasome non-ATPase regulatory subunit 2                                             | IPI00012268                                     | 100,184.20 | 764 | 773 | LAQGLTHLGK                 | R | G | 1,037.61 |
| 5891 | PFKP 6-phosphofructokinase type C                                                                | IPI00009790                                     | 85,579.40  | 766 | 784 | ASYDVSDSGQLLEHVQPWSV       | K | - | 2,103.96 |
| 5892 | ATP1A1 Isoform Long of Sodium/potassium-transporting ATPase subunit alpha-1                      | IPI00006482,IPI00646182                         | 112,881.50 | 767 | 774 | LIFDNLKK                   | R | S | 990.5984 |
| 5893 | UHRF1 ubiquitin-like with PHD and ring finger domains 1 isoform 2                                | IPI00797279,IPI00797945                         | 91,082.30  | 767 | 776 | AQVFSCPACR                 | R | Y | 1,195.53 |
| 5894 | EEF2 Elongation factor 2                                                                         | IPI00186290                                     | 95,322.10  | 768 | 785 | GHVFEESQVAGTPMFVVK         | R | A | 1,961.98 |
| 5895 | PFKM cDNA FLJ44241 fis, clone THYMU3008436, highly similar to 6-phosphofructokinase, muscle type | IPI00465179,IPI00743142                         | 93,203.30  | 771 | 785 | IFANTPDSGCVLGMR            | R | K | 1,653.77 |
| 5896 | HSPA4 Heat shock 70 kDa protein 4                                                                | IPI00002966                                     | 94,313.90  | 772 | 789 | IKELTSTCSPHISKPKPK         | K | V | 2,027.16 |
| 5897 | PWP2 Periodic tryptophan protein 2 homolog                                                       | IPI00300078                                     | 102,436.00 | 774 | 784 | LVQEALAVPR                 | K | G | 1,224.69 |
| 5898 | TNPO1 transportin 1 isoform 1                                                                    | IPI00024364,IPI00843876                         | 102,340.80 | 774 | 785 | TLENTAITIGR                | K | L | 1,301.74 |
| 5899 | TRIM28 Isoform 1 of Transcription intermediary factor 1-beta                                     | IPI00438229,IPI00438230                         | 88,531.00  | 775 | 790 | LTEDKADVQSIIGLQR           | K | F | 1,785.97 |
| 5900 | STAU1 Isoform Short of Double-stranded RNA-binding protein Staufen homolog 1                     | IPI00218609,IPI00643664,IPI_WendyP53Mut         | 124,563.80 | 777 | 788 | NAAIAVLEELKK               | K | L | 1,298.77 |
| 5901 | EIF4G2 cDNA FLJ59571, highly similar to Eukaryotic translation initiation factor 4gamma 2        | IPI00015952                                     | 110,247.70 | 777 | 787 | MLPEIDQNKDR                | K | M | 1,374.67 |
| 5902 | NOC3L Nucleolar complex protein 3 homolog                                                        | IPI00102815,IPI00843861                         | 92,534.20  | 779 | 793 | YSSEVATESPLDFTK            | R | Y | 1,673.79 |
| 5903 | MATR3 Matrin-3                                                                                   | IPI00017297,IPI00789551                         | 94,608.70  | 781 | 798 | IGPYQPNVPVGVIDYVIPK        | R | T | 1,969.08 |
| 5904 | NARG1 Isoform 1 of NMDA receptor-regulated protein 1                                             | IPI00386189                                     | 101,259.90 | 783 | 797 | AIELATTLDESLTNR            | R | N | 1,646.86 |
| 5905 | EEF2 Elongation factor 2                                                                         | IPI00186290                                     | 95,322.10  | 786 | 801 | AYLPVNESFGFTADLR           | K | S | 1,799.90 |
| 5906 | EEF2 Elongation factor 2                                                                         | IPI00186290                                     | 95,322.10  | 786 | 801 | AYLPVNESFGFTADLR           | K | S | 1,799.90 |
| 5907 | EEF2 Elongation factor 2                                                                         | IPI00186290                                     | 95,322.10  | 786 | 801 | AYLPVNESFGFTADLR           | K | S | 1,799.90 |
| 5908 | SMEK1 Isoform 1 of Serine/threonine-protein phosphatase 4 regulatory subunit 3A                  | IPI00217013,IPI00384714,IPI00479778,IPI00792955 | 95,354.30  | 787 | 797 | NTSQTAAITTK                | K | G | 1,135.60 |
| 5909 | ABCF1 Isoform 2 of ATP-binding cassette sub-family F member 1                                    | IPI00013495,IPI00873899                         | 91,664.60  | 792 | 807 | EVLEALGEVMVSRPRE           | R | - | 1,813.95 |
| 5910 | SART1 U4/U6.U5 tri-snRNP-associated protein 1                                                    | IPI00021417                                     | 90,239.10  | 792 | 800 | SMNANTITK                  | K | - | 995.4827 |
| 5911 | ACTN4 Alpha-actinin-4                                                                            | IPI00013808                                     | 104,839.20 | 792 | 813 | ACLISLGYDVENDRQGEAEF<br>NR | K | I | 2,556.18 |
| 5912 | MTHFD1 C-1-tetrahydrofolate synthase, cytoplasmic                                                | IPI00218342,IPI00794900                         | 101,543.50 | 794 | 804 | GALALAQAVQR                | K | A | 1,097.64 |
| 5913 | MCM3 cDNA FLJ55599, highly similar to DNA replication licensing factor MCM3                      | IPI00013214                                     | 95,892.30  | 794 | 801 | VALLDVFR                   | K | E | 932.5564 |
| 5914 | TRIM28 Isoform 1 of Transcription intermediary factor 1-beta                                     | IPI00438229,IPI00438230                         | 88,531.00  | 796 | 804 | MNEAFGDTK                  | R | F | 1,028.44 |
| 5915 | COPG Coatomer subunit gamma                                                                      | IPI00783982                                     | 97,701.40  | 796 | 806 | TLEEAVGNIVK                | K | F | 1,172.65 |
| 5916 | MTHFD1 C-1-tetrahydrofolate synthase, cytoplasmic                                                | IPI00218342,IPI00794900                         | 101,543.50 | 805 | 819 | AAQAPSSFQLLYDLK            | R | L | 1,651.87 |
| 5917 | MATR3 Matrin-3                                                                                   | IPI00017297,IPI00789551                         | 94,608.70  | 805 | 817 | LCSLFYTNEEVAK              | K | N | 1,573.76 |
| 5918 | MARS Methionyl-tRNA synthetase, cytoplasmic                                                      | IPI00008240                                     | 101,099.50 | 805 | 814 | LENDQIESLR                 | K | Q | 1,216.62 |
| 5919 | STAU1 Isoform Short of Double-stranded RNA-binding protein Staufen homolog 1                     | IPI00218609,IPI00643664,IPI_WendyP53Mut         | 124,563.80 | 806 | 827 | TKPIVKPQTSPEYGGGINPISR     | K | L | 2,410.31 |
| 5920 | USO1 Putative uncharacterized protein DKFZp451D234                                               | IPI00031583                                     | 109,171.10 | 810 | 821 | SQLNSQSVEITK               | K | L | 1,333.70 |
| 5921 | MTHFD1 C-1-tetrahydrofolate synthase, cytoplasmic                                                | IPI00218342,IPI00794900                         | 101,543.50 | 820 | 827 | LPVEDKIR                   | K | I | 969.5729 |
| 5922 | UNC45A Isoform 1 of Protein unc-45 homolog A                                                     | IPI00072534,IPI00735181                         | 103,060.90 | 822 | 836 | LLVLYSGEDELLEQR            | K | A | 1,762.92 |
| 5923 | PSMD1 Isoform 1 of 26S proteasome non-ATPase regulatory subunit 1                                | IPI00299608,IPI00456695                         | 105,821.20 | 828 | 838 | VSTAVLSITAK                | K | A | 1,089.65 |
| 5924 | STAU1 Isoform Short of Double-stranded RNA-binding protein Staufen homolog 1                     | IPI00218609,IPI00643664,IPI_WendyP53Mut         | 124,563.80 | 828 | 835 | LAQIQQAK                   | R | K | 899.531  |
| 5925 | DIS3 Isoform 2 of Exosome complex exonuclease RRP44                                              | IPI00183462,IPI00746351                         | 105,025.50 | 828 | 836 | NAIVVLIPK                  | K | Y | 966.6347 |
| 5926 | COPG2 Coatomer subunit gamma-2                                                                   | IPI00002557                                     | 97,606.50  | 833 | 840 | GGYDLLVR                   | R | S | 892.4888 |



|      |                                                                              |                                                 |            |      |      |                  |   |   |          |
|------|------------------------------------------------------------------------------|-------------------------------------------------|------------|------|------|------------------|---|---|----------|
| 5927 | STAU1 Isoform Short of Double-stranded RNA-binding protein Staufen homolog 1 | IPI00218609,IPI00643664,IPL_WendyP53Mut         | 124,563.80 | 836  | 848  | KEKEPEYLLTER     | K | G | 1,635.86 |
| 5928 | ACTN4 Alpha-actinin-4                                                        | IPI00013808                                     | 104,839.20 | 838  | 853  | ETDTDADQVIASFK   | R | V | 1,741.81 |
| 5929 | USO1 Putative uncharacterized protein DKFZp451D234                           | IPI00031583                                     | 109,171.10 | 839  | 853  | SVEVQGETETIIATK  | K | T | 1,604.84 |
| 5930 | COPG Coatomer subunit gamma                                                  | IPI00783982                                     | 97,701.40  | 846  | 859  | LLLLDVTMQVTAR    | R | S | 1,589.89 |
| 5931 | PSMD2 26S proteasome non-ATPase regulatory subunit 2                         | IPI00012268                                     | 100,184.20 | 846  | 860  | VGQAVDVVGQAGKPK  | R | T | 1,452.82 |
| 5932 | EIF3CL;EIF3C Eukaryotic translation initiation factor 3 subunit C            | IPI00016910,IPI00646839,IPI00873286,IPI00910003 | 105,329.20 | 847  | 862  | TEPTAQQLALQLAEK  | R | L | 1,754.93 |
| 5933 | CSE1L Isoform 1 of Exportin-2                                                | IPI00022744,IPI00219994                         | 110,403.90 | 849  | 863  | LLTECPPMMDTEYTK  | K | L | 1,860.81 |
| 5934 | AOF2 Isoform 2 of Lysine-specific histone demethylase 1                      | IPI00217540,IPI00456631                         | 95,137.70  | 849  | 862  | IADQFLGAMYTLPR   | R | Q | 1,595.83 |
| 5935 | EPRS Bifunctional aminoacyl-tRNA synthetase                                  | IPI00013452,IPI00909383                         | 170,632.20 | 850  | 861  | INEAVECLLSLK     | K | A | 1,388.75 |
| 5936 | IDE Insulin-degrading enzyme                                                 | IPI00220373                                     | 117,956.00 | 863  | 872  | VEAFLITMEK       | R | S | 1,196.62 |
| 5937 | EIF3CL;EIF3C Eukaryotic translation initiation factor 3 subunit C            | IPI00016910,IPI00646839,IPI00873286,IPI00910003 | 105,329.20 | 863  | 872  | LGSLVENNER       | K | V | 1,130.58 |
| 5938 | MTHFD1 C-1-tetrahydrofolate synthase, cytoplasmic                            | IPI00218342,IPI00794900                         | 101,543.50 | 867  | 878  | THLSLSHNPEQK     | K | G | 1,390.71 |
| 5939 | ACTN4 Alpha-actinin-4                                                        | IPI00013808                                     | 104,839.20 | 870  | 882  | ELPPDQAEYCIAR    | R | M | 1,561.73 |
| 5940 | SND1 Staphylococcal nuclease domain-containing protein 1                     | IPI00140420,IPI00910438                         | 101,980.50 | 874  | 886  | VITEYLNAQESAK    | K | S | 1,465.75 |
| 5941 | MTHFD1 C-1-tetrahydrofolate synthase, cytoplasmic                            | IPI00218342,IPI00794900                         | 101,543.50 | 879  | 889  | GVPTGFILPIR      | K | D | 1,169.70 |
| 5942 | CLTC Isoform 1 of Clathrin heavy chain 1                                     | IPI00024067,IPI00455383                         | 191,600.90 | 882  | 892  | IYIDSNNNPER      | K | F | 1,334.63 |
| 5943 | ACTN4 Alpha-actinin-4                                                        | IPI00013808                                     | 104,839.20 | 883  | 899  | MAPYQGPDVPGALDYK | R | S | 1,792.86 |
| 5944 | PRPF6 Pre-mRNA-processing factor 6                                           | IPI00305068                                     | 106,909.70 | 884  | 898  | FELQHGTEEQEEVR   | K | K | 1,858.86 |
| 5945 | XRN2 Isoform 1 of 5'-3' exoribonuclease 2                                    | IPI00100151,IPI00788157                         | 108,567.60 | 884  | 895  | GVGAEPLLPWNR     | R | M | 1,308.71 |
| 5946 | CSE1L Isoform 1 of Exportin-2                                                | IPI00022744,IPI00219994                         | 110,403.90 | 913  | 925  | EHDPVGQMVNNPK    | K | I | 1,480.69 |
| 5947 | CSE1L Isoform 1 of Exportin-2                                                | IPI00022744,IPI00219994                         | 110,403.90 | 935  | 942  | LSTACPGR         | K | V | 861.4248 |
| 5948 | STAU1 Isoform Short of Double-stranded RNA-binding protein Staufen homolog 1 | IPI00218609,IPI00643664,IPL_WendyP53Mut         | 124,563.80 | 986  | 994  | ATVTAMIAR        | K | E | 949.5136 |
| 5949 | STAU1 Isoform Short of Double-stranded RNA-binding protein Staufen homolog 1 | IPI00218609,IPI00643664,IPL_WendyP53Mut         | 124,563.80 | 995  | 1010 | ELLYGGTSPTAETILK | R | N | 1,692.91 |
| 5950 | UBA1 Ubiquitin-like modifier-activating enzyme 1                             | IPI00645078                                     | 117,832.30 | 1011 | 1021 | LDQPMTEIVSR      | R | V | 1,288.66 |
| 5951 | STAU1 Isoform Short of Double-stranded RNA-binding protein Staufen homolog 1 | IPI00218609,IPI00643664,IPL_WendyP53Mut         | 124,563.80 | 1089 | 1102 | LLSELDQQSTEMPR   | K | T | 1,646.81 |
| 5952 | STAU1 Isoform Short of Double-stranded RNA-binding protein Staufen homolog 1 | IPI00218609,IPI00643664,IPL_WendyP53Mut         | 124,563.80 | 1103 | 1113 | TGNGPMSVCGR      | R | - | 1,151.49 |
| 5953 | CLTC Isoform 1 of Clathrin heavy chain 1                                     | IPI00024067,IPI00455383                         | 191,600.90 | 1216 | 1226 | LLYNNVSNFGR      | K | L | 1,296.67 |
| 5954 | FASN Fatty acid synthase                                                     | IPI00026781                                     | 273,382.00 | 1852 | 1866 | VVVQVLAEEPEAVLK  | K | G | 1,622.94 |
| 5955 | MYH9 Isoform 1 of Myosin-9                                                   | IPI00019502,IPI00395772                         | 226,519.50 | 1923 | 1932 | RGDLFPVVPR       | R | R | 1,155.66 |
| 5956 | FASN Fatty acid synthase                                                     | IPI00026781                                     | 273,382.00 | 2383 | 2396 | VLEALLPLKGLEER   | R | V | 1,579.94 |
